# Supplementary material for: Characterization of the Gene Expression Profile Response to Drought Stress in Populus ussuriensis Using PacBio SMRT and Illumina Sequencing
Source: MDPI journal article supplement (doi:10.3390/ijms23073840), 2022-03-30
Supplement: s1 [file s1]

**Table S2.** Overview of the RNA sequencing in *Populus ussuriensis*.

| Sample | Raw Reads (Mb) | Clean Reads (Mb) | Clean Bases (Gb) | Raw Reads Q30 Rate (%) | Clean Reads Q30 Rate (%) | Mapped Reads (Mb) | Mapping Rate (%) | MultiMap Reads | MultiMap Rate (%) |
|--------|----------------|------------------|------------------|------------------------|--------------------------|-------------------|------------------|----------------|-------------------|
| CK-1   | 48,208,730     | 45,944,066       | 6,891,609,900    | 93.68                  | 94.06                    | 38,310,710        | 69.2             | 16,044,354     | 29                |
| CK-2   | 48,830,500     | 47,039,462       | 7,055,919,300    | 93.15                  | 93.57                    | 35,657,838        | 69               | 14,657,924     | 28.4              |
| CK-3   | 48,375,674     | 46,727,552       | 7,009,132,800    | 93.27                  | 93.65                    | 37,126,730        | 69               | 15,274,430     | 28.4              |
| 6h-1   | 49,867,122     | 47,883,300       | 7,182,495,000    | 93.64                  | 94.02                    | 42,069,514        | 69               | 17,311,578     | 28.4              |
| 6h-2   | 44,300,200     | 42,766,150       | 6,414,922,500    | 93.75                  | 94.13                    | 28,971,568        | 67.7             | 11,726,844     | 27.4              |
| 6h-3   | 45,803,258     | 44,312,524       | 6,646,878,600    | 93.81                  | 94.17                    | 30,016,678        | 67.7             | 11,958,736     | 27                |
| 12h-1  | 47,748,878     | 46,123,956       | 6,918,593,400    | 93.45                  | 93.9                     | 34,486,470        | 69.5             | 14,351,696     | 28.9              |
| 12h-2  | 48,434,624     | 46,612,778       | 6,991,916,700    | 93.08                  | 93.52                    | 35,768,146        | 70.1             | 14,822,522     | 29.1              |
| 12h-3  | 47,057,384     | 45,601,728       | 6,840,259,200    | 93.58                  | 94.02                    | 39,586,310        | 69.6             | 16,183,546     | 28.5              |
| 24h-1  | 46,949,778     | 45,693,072       | 6,853,960,800    | 93.57                  | 94                       | 38,723,896        | 69.2             | 16,165,064     | 28.9              |
| 24h-2  | 43,221,040     | 41,994,706       | 6,299,205,900    | 93.43                  | 93.86                    | 29,422,946        | 70.1             | 12,379,056     | 29.5              |
| 24h-3  | 47,272,212     | 45,457,082       | 6,818,562,300    | 93.45                  | 93.83                    | 40,184,286        | 68.8             | 16,574,466     | 28.4              |
| 48h-1  | 48,535,886     | 47,402,184       | 7,110,327,600    | 93.24                  | 93.61                    | 33,966,164        | 69.4             | 14,152,508     | 28.9              |
| 48h-2  | 45,470,182     | 44,043,960       | 6,606,594,000    | 93.67                  | 94.04                    | 31,610,744        | 70               | 13,251,100     | 29.1              |
| 48h-3  | 47,702,118     | 46,572,610       | 6,985,891,500    | 93.64                  | 94.02                    | 35,259,468        | 69.8             | 14,830,386     | 29.4              |
| 120h-1 | 45,605,356     | 44,001,044       | 6,600,156,600    | 93.94                  | 94.28                    | 34,757,258        | 69.9             | 14,718,010     | 29.6              |
| 120h-2 | 43,465,462     | 41,885,968       | 6,282,895,200    | 94.35                  | 94.66                    | 29,328,332        | 70               | 12,377,788     | 29.6              |
| 120h-3 | 48,166,758     | 46,727,276       | 7,009,091,400    | 93.95                  | 94.33                    | 36,410,966        | 69.9             | 15,255,106     | 29.3              |
