# Supplementary material for: Characterization of the Gene Expression Profile Response to Drought Stress in Populus ussuriensis Using PacBio SMRT and Illumina Sequencing
Source: MDPI journal article supplement (doi:10.3390/ijms23073840), 2022-03-30
Supplement: s1 [file s1]

**Table S1.** Primers for quantitative PCR in *Populus ussuriensis*.

| Gene_id          | Function annotated | Primer orientation | Primer sequence         |
|------------------|--------------------|--------------------|-------------------------|
| f2p30_1011_11035 | CML38              | forward            | GTCACACTCAGTTTCATCCTC   |
|                  |                    | reverse            | CTGCGTGGTTATTGTCGGGT    |
| f5p60_1300_26955 | MAPKKK1<br>8       | forward            | GGAGAATTTAACAAGCAAATTG  |
|                  |                    | reverse            | GGACCAAGACCAGGCTCTCC    |
| f2p21_2499_2742  | NCED3              | forward            | CGAGACACTCCCTCTCCTGTTG  |
|                  |                    | reverse            | GGGTAGAGGGTGTGACGTTT    |
| f7p60_2856_19557 | KT2                | forward            | AGGGTGGTACTTTTGCATTG    |
|                  |                    | reverse            | GTGGAGAGTGATTTCATCTGC   |
| f2p60_2293_3245  | NCL                | forward            | GTGTAGGAGGTGGCACTCCTG   |
|                  |                    | reverse            | GACTCCCCCATCACTCTCTC    |
| f3p60_1980_22126 | CAX7               | forward            | CCAATGAGCCAGAAGTCACC    |
|                  |                    | reverse            | CCCAATATTAGACTTGATGTAC  |
| f2p60_1369_7946  | RAB18              | forward            | CCATTTCAAAGAGAGAAAAAAG  |
|                  |                    | reverse            | GTCTCACCCCTGCGCTCATC    |
| f2p37_1282_27056 | LEA29              | forward            | CGTTCTTCAACCCCGACAGAAG  |
|                  |                    | reverse            | CATTCGGCCCATGACTCGGTGG  |
| f2p60_820_32228  | DNJ11              | forward            | GTATCGTTAGTGTATTTTCAATC |
|                  |                    | reverse            | GGAAGCGAATGAGGCTGATTGG  |
| f2p59_1311_26810 | PER4               | forward            | GTAACCTTGGCCATCCTAG     |
|                  |                    | reverse            | CTGCTGAAAAGAGATGTGGGC   |
| f2p60_894_312621 | GSTXC              | forward            | GAAGTGGTTCTACTGGATTTTG  |
|                  |                    | reverse            | GCTCAAGTCCTCCACCTGAG    |
| f2p28_837_12827  | SODC               | forward            | GTGCTCTGAGAACAATGGTG    |
|                  |                    | reverse            | GCTTAAGACCAGAAAGGTTTC   |
| f8p60_1108_28852 | ERF017             | forward            | GGTGGGCAGTCACTTAGTTTCG  |
|                  |                    | reverse            | GATTCACCTCTCATAGCAGTC   |
| f2p24_969_11433  | ZAT11              | forward            | GAAGAGAGATAGAGAACAGGC   |
|                  |                    | reverse            | CGGTGCTGCTGCTGCTGCTG    |
| f2p60_1403_7712  | HB7                | forward            | GACTACAGCATGCTACGAGC    |
|                  |                    | reverse            | CACTCTCCTTCCTCTACCGG    |
| f3p60_1224_9210  | MYB58              | forward            | CTTGCAATCTAATGAAGTTC    |
|                  |                    | reverse            | CCAATATTATATGCATCTCC    |
| f7p60_1432_25632 | NAC35              | forward            | CATCCAACAGATGATGAGTTGG  |
|                  |                    | reverse            | CTTGTAAGATCAATCTCAGC    |
| f2p37_1325_26690 | WRKY75             | forward            | CACCATCATCACTAAACATG    |
|                  |                    | reverse            | GCATCCAAATGTTGAAACCTAC  |

|                  |       |         |                           |
|------------------|-------|---------|---------------------------|
| f2p60_1764_23398 | UBQ10 | forward | GGAGTCAACCCTTCACTTGGTGC   |
|                  |       | reverse | GAGGACAAGGTGAAGGGTGGACTCC |

---
