# Supplementary material for: Characterization of the Gene Expression Profile Response to Drought Stress in Populus ussuriensis Using PacBio SMRT and Illumina Sequencing
Source: MDPI journal article supplement (doi:10.3390/ijms23073840), 2022-03-30
Supplement: s1 [file s1]

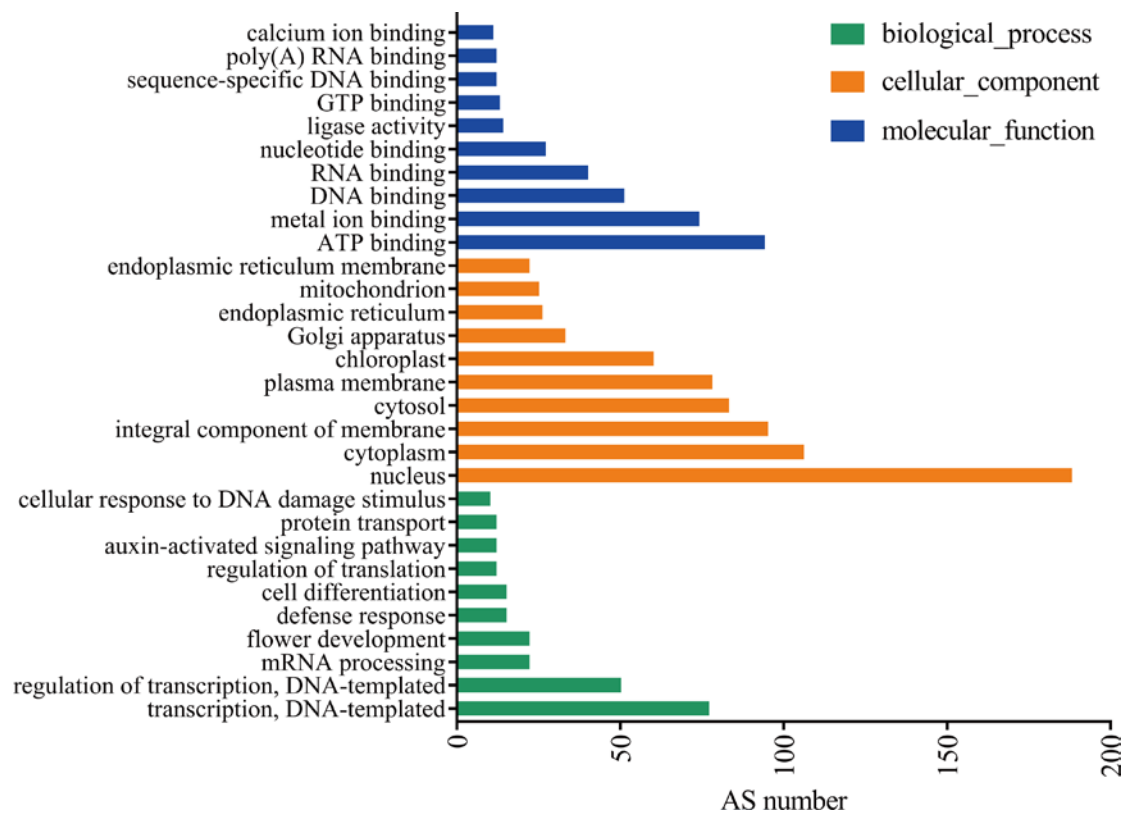

**Figure S1.** Gene ontology classification of alternative splicing (AS).

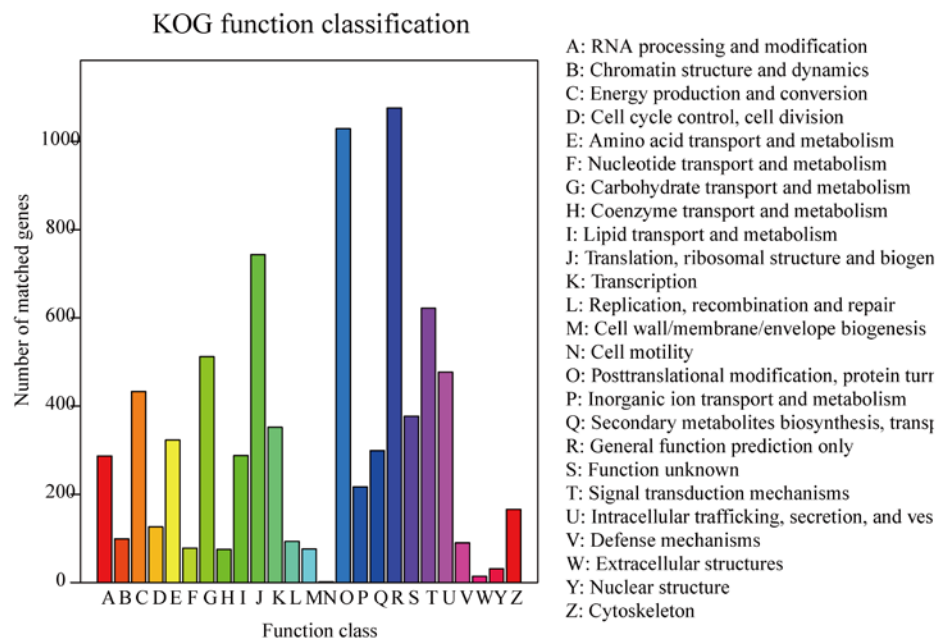

**Figure S2.** The euKaryotic Ortholog Groups annotation.

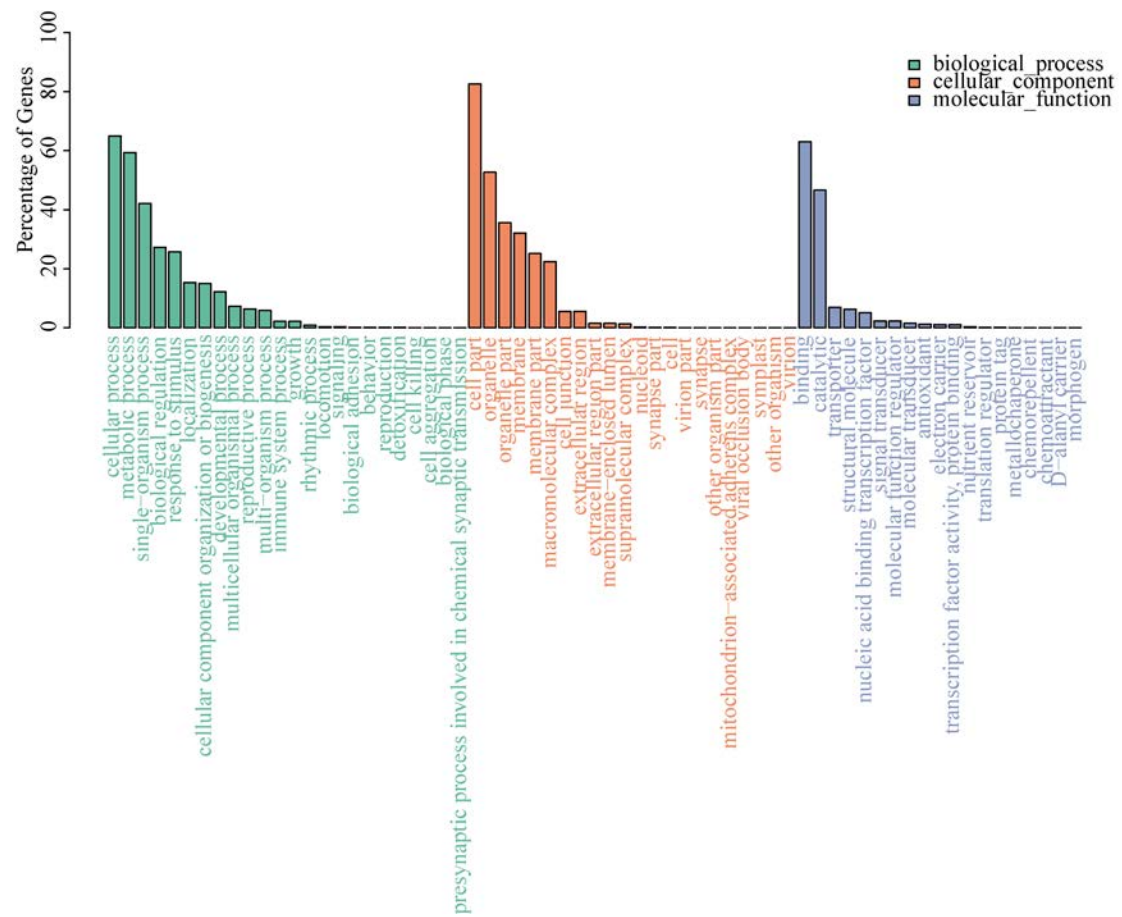

**Figure S3.** Gene ontology classification of all genes.

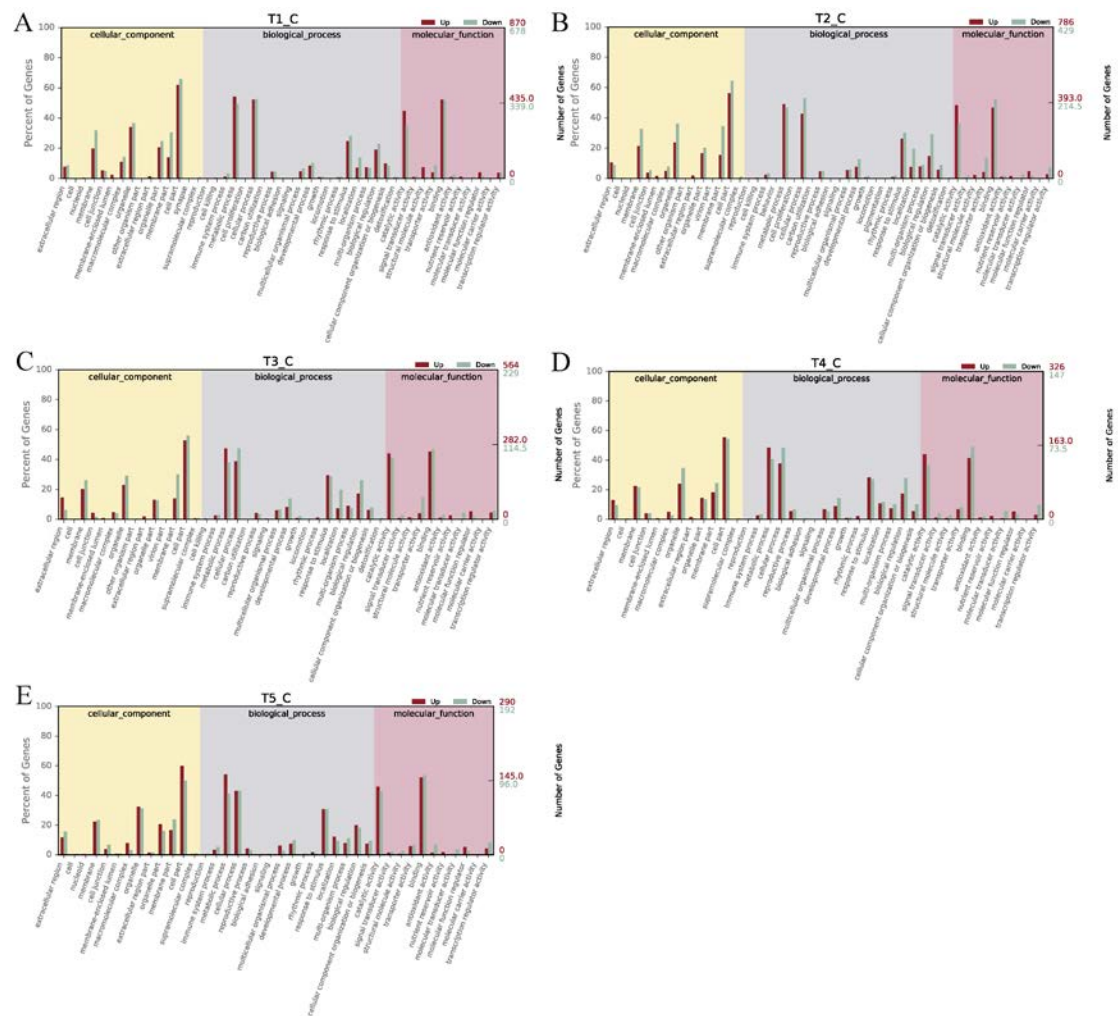

**Figure S4.** Gene ontology classification of differentially expressed genes.

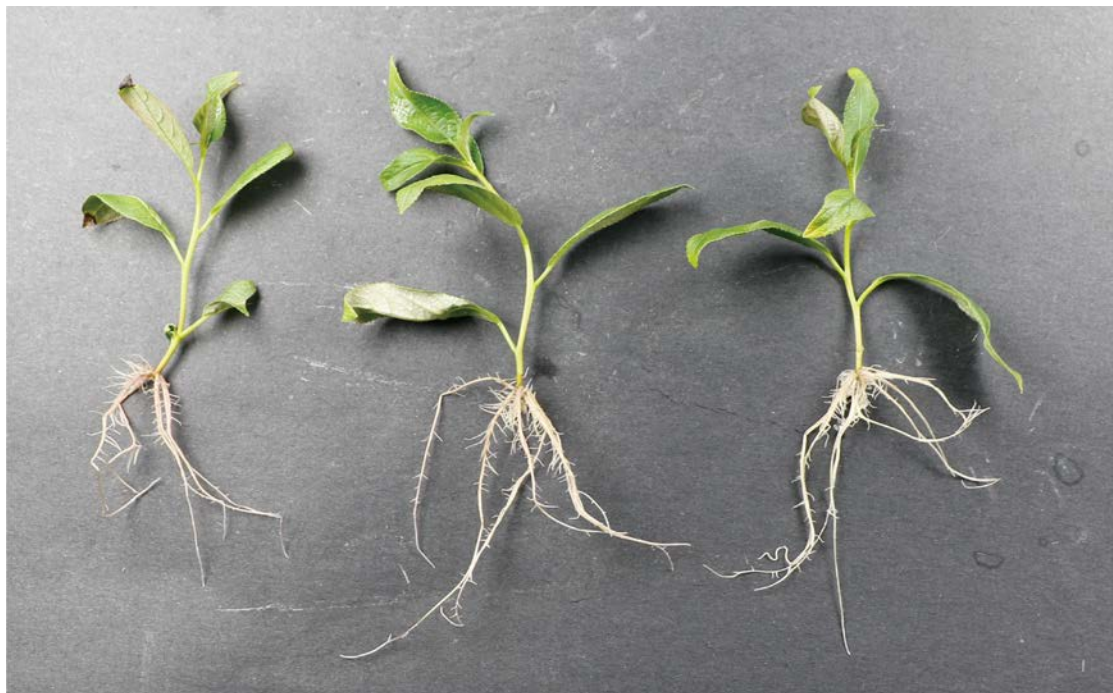

**Figure S5.** Three-week-old *Populus ussuriensis* seedlings.

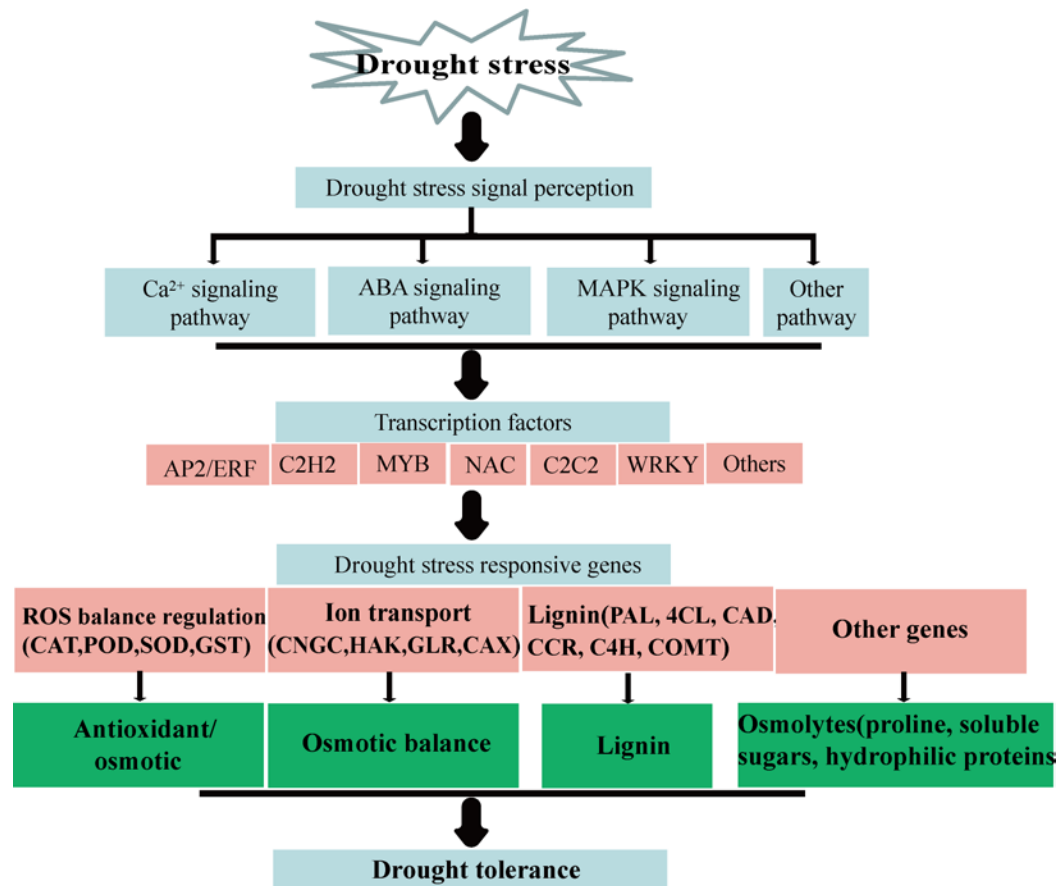

**Figure S6.** A hypothetical model of drought responses in *Populus ussuriensis*.
