# Supplementary material for: Characterization of the Gene Expression Profile Response to Drought Stress in Populus ussuriensis Using PacBio SMRT and Illumina Sequencing
Source: Int J Mol Sci. 2022 Mar 30;23(7):3840. doi: 10.3390/ijms23073840 (PMC8998571; doi:10.3390/ijms23073840)
Supplement: Supplementary file 1 [file ijms-23-03840-s001.zip]

Archive with 19 entries (19 files):
- Figure S1.tif
- Figure S2.tif
- Figure S3.tif
- Figure S4.tif
- Figure S5.tif
- Figure S6.tif
- Figures S1-S6 containg caption.pdf
- Table S1.pdf
- Table S10.xls
- Table S11.xls
- Table S12.xls
- Table S2.pdf
- Table S3.xls
- Table S4.xls
- Table S5.xls
- Table S6.xls
- Table S7.xls
- Table S8.xls
- Table S9.xls
