# Supplementary material for: Characterization of the Gene Expression Profile Response to Drought Stress in Populus ussuriensis Using PacBio SMRT and Illumina Sequencing
Source: Int J Mol Sci. 2022 Mar 30;23(7):3840. doi: 10.3390/ijms23073840 (PMC8998571; doi:10.3390/ijms23073840)
Supplement: Supplementary file 1 [file ijms-23-03840-s001.zip › Table S3.xls]

## Sheet: Sheet1
Table S3 Identification of SSRs in Populus ussuriensis
Gene	Number	MotifLength	Motif	Repeats	Start	End	Distance	SeqLength
f2p40_5894_22	1	3	GCA	7	2739	2759	3135	5894
f2p40_5894_22	2	3	CAG	10	4821	4850	1044	5894
f2p45_5806_27	1	3	GCA	7	2737	2757	3049	5806
f2p45_5806_27	2	3	CAG	10	4818	4847	959	5806
f3p60_5789_30	1	2	GA	11	1	22	5767	5789
f2p34_5755_34	1	3	GCA	6	2739	2756	2999	5755
f2p34_5755_34	2	3	CAG	6	4038	4055	1700	5755
f2p34_5755_34	3	3	CAG	6	4851	4868	887	5755
f2p19_5592_42	1	3	CAG	7	4454	4474	1118	5592
f2p38_5532_48	1	3	TAT	8	4371	4394	1138	5532
f4p60_5160_80	1	2	GA	9	6	23	5137	5160
f2p36_5154_81	1	2	GA	9	232	249	4905	5154
f2p47_4852_110	1	2	TC	9	143	160	4692	4852
f2p34_4869_112	1	3	ATT	6	184	201	4668	4869
f2p9_4830_126	1	3	AAT	6	4760	4777	53	4830
f2p60_4764_129	1	3	GAG	6	456	473	4291	4764
f3p45_4721_137	1	4	GAAG	5	185	204	4517	4721
f2p60_4543_172	1	3	TGG	7	720	740	3803	4543
f2p26_4002_187	1	3	CTT	6	316	333	3669	4002
f2p10_4522_197	1	3	CAA	6	399	416	4106	4522
f4p60_4481_199	1	2	AG	9	1	18	4463	4481
f3p49_4455_201	1	2	AG	9	1	18	4437	4455
f2p35_4437_209	1	3	CAG	7	3303	3323	1114	4437
f3p60_4432_212	1	2	AG	13	1	26	4406	4432
f3p60_4450_218	1	2	AG	13	1	26	4424	4450
f3p22_4425_219	1	2	AT	16	4250	4281	144	4425
f2p44_4409_225	1	2	AT	16	4238	4269	140	4409
f2p26_4408_226	1	3	CAG	6	978	995	3413	4408
f2p26_4408_226	2	3	GCA	10	2595	2624	1784	4408
f2p44_4435_228	1	3	AAG	8	153	176	4259	4435
f3p60_4391_230	1	2	CT	9	37	54	4337	4391
f2p27_4356_235	1	3	GAA	6	1867	1884	2472	4356
f2p45_4365_240	1	2	AG	15	4185	4214	151	4365
f3p33_4352_247	1	2	CT	9	34	51	4301	4352
f2p16_4326_253	1	2	AT	11	4055	4076	250	4326
f2p20_4301_259	1	3	AAG	8	112	135	4166	4301
f2p14_4277_291	1	2	TA	10	4053	4072	205	4277
f3p60_4226_299	1	2	CT	9	34	51	4175	4226
f2p26_4226_301	1	3	CCA	8	143	166	4060	4226
f2p41_4197_309	1	2	CT	9	34	51	4146	4197
f2p13_4209_311	1	3	CAG	9	805	831	3378	4209
f2p13_4257_313	1	4	CTCC	6	159	182	4075	4257
f3p60_4190_315	1	4	TTTC	5	3931	3950	240	4190
f3p60_4162_332	1	3	GAC	7	708	728	3434	4162
f2p16_4232_339	1	3	CAG	6	2551	2568	1664	4232
f2p16_4232_339	2	3	CAG	7	2572	2592	1640	4232
f2p16_4232_339	3	3	CAG	6	2599	2616	1616	4232
f2p16_4232_339	4	3	CAG	6	2623	2640	1592	4232
f2p16_4232_339	5	3	CAG	6	2665	2682	1550	4232
f2p16_4232_339	6	3	CAG	6	3187	3204	1028	4232
f2p16_4232_339	7	3	CAG	10	3256	3285	947	4232
f2p16_4232_339	8	3	CAG	8	3298	3321	911	4232
f2p16_4232_339	9	3	CAG	6	3331	3348	884	4232
f2p16_4232_339	10	3	CAG	9	3361	3387	845	4232
f2p29_4127_351	1	3	TCT	6	74	91	4036	4127
f7p60_4107_367	1	2	AG	11	18	39	4068	4107
f2p60_4086_381	1	4	TTTC	5	3842	3861	225	4086
f3p60_4071_382	1	2	GA	12	39	62	4009	4071
f2p9_4122_388	1	2	AT	10	242	261	3861	4122
f2p59_4066_390	1	3	CAC	7	149	169	3897	4066
f4p53_4059_393	1	3	CAC	7	218	238	3821	4059
f2p59_4076_395	1	3	AAG	8	151	174	3902	4076
f3p60_4039_405	1	3	TCT	6	32	49	3990	4039
f3p60_4054_409	1	4	TTTC	5	3844	3863	191	4054
f2p60_4047_412	1	2	GA	10	6	25	4022	4047
f2p60_4059_418	1	3	GAC	7	654	674	3385	4059
f2p58_4017_426	1	3	AAT	6	3947	3964	53	4017
f2p23_4065_448	1	2	TA	10	3951	3970	95	4065
f3p60_3962_463	1	3	CCA	9	143	169	3793	3962
f2p60_4004_467	1	2	AG	9	9	26	3978	4004
f4p60_3967_477	1	3	AGA	6	107	124	3843	3967
f4p60_3967_477	2	4	CTTT	5	194	213	3754	3967
f3p60_3940_489	1	3	GCT	6	121	138	3802	3940
f2p60_3919_494	1	2	CA	9	19	36	3883	3919
f4p60_3936_496	1	3	CCA	9	143	169	3767	3936
f4p60_3909_499	1	2	GA	12	64	87	3822	3909
f4p60_3909_499	2	3	TCT	6	287	304	3605	3909
f10p60_3954_500	1	3	GCT	6	125	142	3812	3954
f2p11_3925_501	1	2	TG	11	3663	3684	241	3925
f11p60_3895_506	1	2	TG	10	3665	3684	211	3895
f3p59_3920_508	1	3	CCA	8	143	166	3754	3920
f3p53_3890_512	1	2	AT	10	62	81	3809	3890
f3p60_3911_513	1	2	TA	9	3847	3864	47	3911
f2p60_3916_516	1	4	CTCC	5	57	76	3840	3916
f3p60_3871_530	1	4	CTCC	5	57	76	3795	3871
f8p60_3859_539	1	4	CTCC	5	60	79	3780	3859
f2p60_3598_545	1	3	AAC	8	198	221	3377	3598
f2p52_3850_558	1	3	CAG	10	1434	1463	2387	3850
f2p11_3897_562	1	4	TTTC	5	80	99	3798	3897
f2p12_3851_564	1	2	AG	9	67	84	3767	3851
f2p12_3851_564	2	4	CTTT	5	86	105	3746	3851
f4p60_3849_568	1	3	AGA	6	106	123	3726	3849
f4p60_3849_568	2	4	CTTT	5	194	213	3636	3849
f3p60_3802_583	1	4	AATA	5	108	127	3675	3802
f2p37_3814_584	1	3	TCC	6	119	136	3678	3814
f2p60_3800_591	1	3	GAA	8	678	701	3099	3800
f2p47_3797_598	1	2	CT	16	33	64	3733	3797
f2p54_3836_609	1	3	CCA	9	143	169	3667	3836
f4p56_3768_613	1	3	TCC	6	3545	3562	206	3768
f2p60_3778_614	1	2	GA	10	777	796	2982	3778
f2p33_3781_618	1	3	GAA	6	592	609	3172	3781
f2p33_3781_618	2	3	TTA	6	3717	3734	47	3781
f2p46_3780_621	1	4	TTTC	5	1926	1945	1835	3780
f5p60_3757_634	1	3	TCC	6	160	177	3580	3757
f2p50_3732_647	1	3	GAA	6	600	617	3115	3732
f3p18_3718_674	1	2	CT	14	33	60	3658	3718
f4p25_3736_677	1	2	GA	10	778	797	2939	3736
f2p16_3743_682	1	2	CA	15	3414	3443	300	3743
f5p60_3675_715	1	3	CAG	11	1374	1406	2269	3675
f5p60_3675_715	2	3	CAT	7	1407	1427	2248	3675
f5p60_3675_715	3	3	CAG	11	1428	1460	2215	3675
f2p38_3664_716	1	3	GAA	6	593	610	3054	3664
f3p60_3672_723	1	3	AAG	9	153	179	3493	3672
f2p5_3809_733	1	2	AT	9	1986	2003	1806	3809
f2p13_3679_735	1	3	TTG	10	215	244	3435	3679
f2p23_3646_749	1	2	AG	9	3136	3153	493	3646
f2p56_3643_751	1	3	TTC	6	567	584	3059	3643
f3p60_3639_758	1	3	AAG	9	96	122	3517	3639
f2p23_3637_767	1	2	AG	10	53	72	3565	3637
f2p30_3621_770	1	3	CAA	11	105	137	3484	3621
f6p36_3664_771	1	2	CT	15	36	65	3599	3664
f2p60_3624_775	1	2	AT	15	3420	3449	175	3624
f4p32_3632_785	1	3	AAG	9	96	122	3510	3632
f4p60_3615_790	1	2	CT	10	106	125	3490	3615
f2p24_3646_791	1	2	TC	11	41	62	3584	3646
f7p60_3637_798	1	2	AG	11	34	55	3582	3637
f2p49_3617_800	1	3	CAG	11	1373	1405	2212	3617
f2p49_3617_800	2	3	CAT	7	1406	1426	2191	3617
f2p49_3617_800	3	3	CAG	9	1427	1453	2164	3617
f5p60_2998_810	1	2	CT	9	76	93	2905	2998
f6p60_3596_820	1	3	AAG	8	96	119	3477	3596
f2p21_3573_851	1	2	CT	9	835	852	2721	3573
f2p21_3573_851	2	4	TTTG	5	1480	1499	2074	3573
f2p20_3556_867	1	3	AAC	8	198	221	3335	3556
f3p55_3546_874	1	2	CT	9	30	47	3499	3546
f2p14_3530_884	1	2	CT	9	31	48	3482	3530
f2p26_3524_888	1	2	AT	9	2394	2411	1113	3524
f2p30_3531_889	1	3	GCA	7	310	330	3201	3531
f2p30_3531_889	2	3	CAG	10	1595	1624	1907	3531
f7p60_3508_891	1	2	GA	16	48	79	3429	3508
f2p60_3564_895	1	2	CT	9	43	60	3504	3564
f4p28_3539_898	1	2	CT	9	75	92	3447	3539
f2p60_3534_911	1	2	AT	11	1993	2014	1520	3534
f2p37_3520_915	1	2	CT	9	27	44	3476	3520
f16p60_3522_920	1	3	AAC	8	162	185	3337	3522
f2p59_3516_921	1	2	CT	15	31	60	3456	3516
f2p60_3501_927	1	3	TAT	9	97	123	3378	3501
f3p33_3491_950	1	2	CT	9	76	93	3398	3491
f5p60_3479_973	1	2	TC	10	30	49	3430	3479
f3p60_3455_981	1	3	ATG	6	886	903	2552	3455
f3p60_3455_982	1	2	TA	11	168	189	3266	3455
f45p60_3412_983	1	2	TC	10	27	46	3366	3412
f4p60_3426_1008	1	2	GA	10	76	95	3331	3426
f2p24_3453_1010	1	2	AG	24	376	423	3030	3453
f2p60_3444_1011	1	2	GA	17	76	109	3335	3444
f22p60_3493_1013	1	2	CT	9	115	132	3361	3493
f6p60_3434_1015	1	2	GA	17	44	77	3357	3434
f2p7_3462_1017	1	2	AG	17	378	411	3051	3462
f2p36_3419_1023	1	3	TTC	7	46	66	3353	3419
f5p60_3423_1026	1	3	CAC	7	80	100	3323	3423
f2p50_3407_1033	1	3	AAG	9	1	27	3380	3407
f2p25_3393_1046	1	3	CAG	11	473	505	2888	3393
f2p25_3393_1046	2	3	CAA	13	506	544	2849	3393
f2p25_3393_1046	3	3	CAG	10	587	616	2777	3393
f2p25_3393_1046	4	3	CAA	6	638	655	2738	3393
f2p25_3393_1046	5	3	CAG	17	662	712	2681	3393
f2p25_3393_1046	6	3	CAG	8	1589	1612	1781	3393
f2p25_3393_1046	7	3	GCA	8	1615	1638	1755	3393
f2p25_3393_1046	8	3	CAG	7	1694	1714	1679	3393
f2p18_3426_1051	1	3	GCC	6	355	372	3054	3426
f2p18_3426_1051	2	4	GCTA	6	2051	2074	1352	3426
f12p60_3396_1056	1	2	TC	10	30	49	3347	3396
f3p44_3469_1058	1	3	AGC	6	108	125	3344	3469
f3p60_3368_1067	1	3	TAT	6	56	73	3295	3368
f3p40_3388_1068	1	3	AGC	9	336	362	3026	3388
f2p22_3405_1080	1	3	AAG	6	258	275	3130	3405
f3p60_3373_1083	1	3	AGC	7	729	749	2624	3373
f6p60_3362_1089	1	2	TC	14	42	69	3293	3362
f2p60_3373_1093	1	3	CTT	6	3	20	3353	3373
f2p30_3373_1094	1	2	TC	10	27	46	3327	3373
f15p60_3348_1113	1	2	AG	12	30	53	3295	3348
f3p60_3353_1132	1	2	AG	17	295	328	3025	3353
f2p16_3336_1140	1	2	AT	9	3288	3305	31	3336
f2p39_3335_1143	1	3	CAC	7	319	339	2996	3335
f2p60_3418_1160	1	3	TCT	7	19	39	3379	3418
f3p26_3298_1192	1	2	CT	13	35	60	3238	3298
f2p60_3313_1193	1	2	AT	22	1571	1614	1699	3313
f2p46_3297_1194	1	2	GA	16	15	46	3251	3297
f2p60_3331_1196	1	2	TC	12	89	112	3219	3331
f7p60_3315_1197	1	4	TTTC	5	308	327	2988	3315
f2p47_3270_1208	1	2	TC	19	36	73	3197	3270
f3p60_3293_1212	1	2	CT	19	36	73	3220	3293
f2p60_3280_1241	1	2	TC	15	42	71	3209	3280
f2p60_3323_1242	1	3	GAT	7	204	224	3099	3323
f2p34_3257_1248	1	3	CAG	7	2122	2142	1115	3257
f2p60_3259_1255	1	2	CT	19	31	68	3191	3259
f2p60_3257_1269	1	2	CT	9	77	94	3163	3257
f2p33_3262_1271	1	2	AT	9	121	138	3124	3262
f3p53_3245_1274	1	2	AG	17	7	40	3205	3245
f2p31_3336_1276	1	2	GA	14	66	93	3243	3336
f2p60_3246_1296	1	2	CA	15	3035	3064	182	3246
f2p48_3215_1309	1	2	CT	13	32	57	3158	3215
f2p60_3232_1321	1	3	CAG	6	2516	2533	699	3232
f3p22_3231_1332	1	3	GAT	7	258	278	2953	3231
f2p14_3268_1338	1	2	CT	13	36	61	3207	3268
f8p60_3235_1343	1	4	TTCC	6	289	312	2923	3235
f8p60_3235_1343	2	4	CCCT	5	366	385	2850	3235
f2p60_3189_1349	1	3	ATC	7	88	108	3081	3189
f3p60_3205_1358	1	4	AATC	7	91	118	3087	3205
f2p60_3185_1368	1	2	CT	12	34	57	3128	3185
f2p60_3185_1368	2	3	TGC	7	433	453	2732	3185
f2p19_3161_1416	1	2	GA	10	48	67	3094	3161
f2p38_3164_1417	1	3	GAG	6	96	113	3051	3164
f2p26_3172_1421	1	3	GCA	11	528	560	2612	3172
f2p26_3172_1421	2	3	CAG	14	574	615	2557	3172
f2p26_3172_1421	3	3	CAG	9	619	645	2527	3172
f2p26_3172_1421	4	3	CAG	13	1435	1473	1699	3172
f11p60_3186_1422	1	2	GA	15	15	44	3142	3186
f2p50_3159_1431	1	3	TCT	7	35	55	3104	3159
f2p60_3184_1432	1	2	CT	9	53	70	3114	3184
f2p37_3111_1457	1	3	CAG	7	996	1016	2095	3111
f4p42_3109_1467	1	3	CAC	6	222	239	2870	3109
f4p42_3109_1467	2	3	CTC	7	248	268	2841	3109
f2p60_3115_1472	1	3	TTC	8	327	350	2765	3115
f2p33_3109_1475	1	3	TCT	7	19	39	3070	3109
f2p60_3179_1479	1	2	TA	18	344	379	2800	3179
f2p29_3148_1495	1	3	CTT	7	241	261	2887	3148
f2p56_3113_1496	1	2	GA	10	1	20	3093	3113
f3p47_3094_1502	1	2	AG	10	120	139	2955	3094
f3p47_3094_1502	2	3	GAA	6	631	648	2446	3094
f3p47_3094_1502	3	4	TAGA	5	103	122	2972	3094
f2p60_3105_1512	1	2	CA	15	2890	2919	186	3105
f2p60_3094_1517	1	2	TC	16	252	283	2811	3094
f2p60_3095_1527	1	2	GT	14	2883	2910	185	3095
f4p60_3071_1529	1	2	AG	11	113	134	2937	3071
f6p60_3104_1542	1	3	CAG	6	2514	2531	573	3104
f2p60_3063_1546	1	2	TG	14	1296	1323	1740	3063
f2p60_3071_1547	1	2	GA	10	47	66	3005	3071
f2p38_3060_1549	1	2	TA	9	293	310	2750	3060
f2p60_3076_1552	1	2	GA	11	16	37	3039	3076
f2p24_3065_1553	1	2	TC	13	38	63	3002	3065
f13p60_3101_1555	1	3	CTT	7	204	224	2877	3101
f3p60_3054_1566	1	4	TGAT	5	2795	2814	240	3054
f6p60_3061_1576	1	2	TC	16	248	279	2782	3061
f3p43_3059_1581	1	3	CTC	6	69	86	2973	3059
f2p60_3046_1586	1	2	TA	9	285	302	2744	3046
f3p60_3047_1598	1	3	CCA	10	1581	1610	1437	3047
f3p60_3044_1600	1	3	GCC	6	225	242	2802	3044
f11p60_3039_1607	1	2	CT	12	69	92	2947	3039
f4p60_3055_1611	1	2	TA	18	254	289	2766	3055
f2p60_3022_1634	1	3	CAG	9	207	233	2789	3022
f2p25_3049_1638	1	3	CCA	6	343	360	2689	3049
f6p60_3081_1640	1	2	TA	11	298	319	2762	3081
f18p60_3005_1660	1	4	GAGG	5	54	73	2932	3005
f2p60_2999_1665	1	2	AG	12	177	200	2799	2999
f2p60_2999_1666	1	2	TC	15	30	59	2940	2999
f2p60_3013_1668	1	2	TC	13	39	64	2949	3013
f2p60_3034_1671	1	2	TC	10	235	254	2780	3034
f4p60_2985_1674	1	2	TC	13	38	63	2922	2985
f2p20_2997_1676	1	3	GTA	7	2887	2907	90	2997
f2p20_2997_1676	2	4	CCCT	5	40	59	2938	2997
f2p60_2968_1713	1	3	CAG	10	217	246	2722	2968
f3p35_2991_1718	1	3	AGG	6	474	491	2500	2991
f3p60_2967_1722	1	2	GA	9	35	52	2915	2967
f2p47_2991_1723	1	2	TC	18	36	71	2920	2991
f2p48_2957_1748	1	3	GGC	6	186	203	2754	2957
f2p60_2955_1752	1	3	GCT	10	96	125	2830	2955
f2p60_2955_1752	2	3	AAC	6	234	251	2704	2955
f2p58_2925_1753	1	2	AG	14	58	85	2840	2925
f4p60_2936_1790	1	2	GA	9	1	18	2918	2936
f2p20_2915_1791	1	2	TC	12	1920	1943	972	2915
f2p20_2915_1791	2	2	TA	11	1944	1965	950	2915
f2p16_2935_1796	1	3	AGA	6	18	35	2900	2935
f2p60_2924_1801	1	2	GA	10	1	20	2904	2924
f5p60_2982_1819	1	2	AG	9	39	56	2926	2982
f3p60_2942_1820	1	2	AG	16	346	377	2565	2942
f2p60_2941_1824	1	3	GAT	8	258	281	2660	2941
f2p60_2894_1826	1	2	CT	9	218	235	2659	2894
f2p44_2915_1830	1	2	CT	10	93	112	2803	2915
f2p44_2915_1830	2	3	CCT	6	242	259	2656	2915
f2p60_2927_1836	1	2	AG	13	8	33	2894	2927
f2p60_2924_1842	1	2	AG	9	51	68	2856	2924
f2p60_2924_1842	2	3	GAA	6	349	366	2558	2924
f2p52_2989_1845	1	3	TTC	7	196	216	2773	2989
f3p50_2906_1849	1	2	AG	17	2616	2649	257	2906
f3p60_2903_1850	1	3	CTG	7	201	221	2682	2903
f2p60_2905_1852	1	2	AG	16	2570	2601	304	2905
f2p48_2900_1864	1	3	CTT	6	115	132	2768	2900
f2p60_2892_1868	1	3	CCA	8	401	424	2468	2892
f2p39_2901_1877	1	3	AAG	8	41	64	2837	2901
f14p60_2895_1884	1	2	GA	10	1	20	2875	2895
f4p60_2879_1891	1	2	AG	24	27	74	2805	2879
f4p60_2855_1917	1	2	AT	10	2779	2798	57	2855
f10p60_2881_1929	1	3	CTT	6	126	143	2738	2881
f2p60_2860_1937	1	2	AG	10	109	128	2732	2860
f6p60_2856_1939	1	2	AC	15	10	39	2817	2856
f2p60_2885_1953	1	3	AGG	6	410	427	2458	2885
f7p60_2854_1965	1	3	GAT	8	2048	2071	783	2854
f10p60_2840_1971	1	2	AG	11	5	26	2814	2840
f2p60_2841_1975	1	3	TGC	6	2400	2417	424	2841
f2p32_2842_1981	1	3	AAT	6	2777	2794	48	2842
f2p28_2828_1982	1	2	GA	9	172	189	2639	2828
f2p12_2879_1993	1	2	CT	10	91	110	2769	2879
f2p12_2879_1993	2	3	CCT	6	240	257	2622	2879
f2p23_2837_1995	1	2	AG	15	10	39	2798	2837
f2p23_2837_1995	2	3	CTT	7	2359	2379	458	2837
f5p60_2814_2014	1	3	GCA	7	1329	1349	1465	2814
f2p60_2816_2027	1	2	CT	10	42	61	2755	2816
f2p55_2815_2028	1	3	CTT	6	120	137	2678	2815
f3p60_2816_2063	1	2	AG	14	20	47	2769	2816
f2p35_2831_2071	1	2	AC	13	1	26	2805	2831
f2p57_2800_2074	1	2	TA	9	2600	2617	183	2800
f2p60_2770_2090	1	3	TTA	6	2706	2723	47	2770
f3p60_2769_2092	1	3	TCT	7	127	147	2622	2769
f3p60_2769_2092	2	3	GAA	8	1163	1186	1583	2769
f3p53_2771_2099	1	2	AG	10	227	246	2525	2771
f2p41_2782_2104	1	3	GCA	7	1330	1350	1432	2782
f2p60_2768_2123	1	3	GGT	6	543	560	2208	2768
f2p59_2778_2153	1	2	AG	10	15	34	2744	2778
f2p15_2799_2175	1	2	CT	13	100	125	2674	2799
f2p60_2734_2193	1	2	GA	12	378	401	2333	2734
f2p60_2734_2193	2	4	TATT	5	615	634	2100	2734
f2p33_2708_2219	1	2	AG	17	19	52	2656	2708
f2p33_2708_2219	2	3	CAG	8	163	186	2522	2708
f2p24_2683_2244	1	2	GA	15	2	31	2652	2683
f2p24_2683_2244	2	3	CTT	7	224	244	2439	2683
f2p60_2699_2259	1	2	AG	11	10	31	2668	2699
f2p37_2774_2277	1	2	AG	11	5	26	2748	2774
f2p60_2682_2293	1	3	GCA	6	1784	1801	881	2682
f2p41_2677_2301	1	3	CAC	6	200	217	2460	2677
f2p41_2677_2301	2	3	CTC	7	226	246	2431	2677
f3p60_2674_2302	1	2	GA	16	7	38	2636	2674
f3p60_2674_2302	2	3	CTT	7	231	251	2423	2674
f2p36_2700_2328	1	2	GA	24	7	54	2646	2700
f2p36_2700_2328	2	3	CTT	13	247	285	2415	2700
f2p48_2657_2346	1	2	GA	10	180	199	2458	2657
f2p22_2660_2355	1	2	TA	18	253	288	2372	2660
f2p60_2705_2358	1	3	TAA	6	380	397	2308	2705
f9p60_2656_2360	1	2	AT	21	2442	2483	173	2656
f12p60_2680_2370	1	3	CAC	6	260	277	2403	2680
f12p60_2680_2370	2	3	CTC	7	286	306	2374	2680
f5p60_2664_2372	1	2	GA	14	1	28	2636	2664
f3p60_2648_2374	1	2	CT	19	23	60	2588	2648
f6p60_2644_2393	1	2	CT	12	24	47	2597	2644
f3p60_2631_2403	1	2	AG	13	81	106	2525	2631
f2p52_2632_2404	1	2	GA	15	7	36	2596	2632
f2p52_2632_2404	2	3	CTT	7	229	249	2383	2632
f2p33_2645_2413	1	3	AGA	9	55	81	2564	2645
f2p22_2627_2428	1	2	TG	17	24	57	2570	2627
f2p22_2627_2428	2	2	GA	18	61	96	2531	2627
f3p60_2633_2433	1	3	ACA	6	152	169	2464	2633
f3p60_2627_2434	1	2	CT	14	16	43	2584	2627
f3p60_2627_2434	2	3	CAA	8	323	346	2281	2627
f3p60_2627_2434	3	3	ACA	6	370	387	2240	2627
f3p60_2632_2447	1	3	CAG	6	2178	2195	437	2632
f2p60_2668_2448	1	2	AG	9	35	52	2616	2668
f4p60_2642_2451	1	2	CT	9	36	53	2589	2642
f2p60_2664_2453	1	2	AT	18	2487	2522	142	2664
f2p60_2615_2458	1	3	CGA	6	28	45	2570	2615
f2p60_2615_2458	2	3	CAT	6	129	146	2469	2615
f7p60_2649_2461	1	3	AAC	8	674	697	1952	2649
f3p60_2648_2476	1	3	CGA	6	88	105	2543	2648
f3p60_2648_2476	2	3	CAT	6	189	206	2442	2648
f2p54_2606_2481	1	2	TG	10	24	43	2563	2606
f2p54_2606_2481	2	2	GA	15	47	76	2530	2606
f4p60_2706_2490	1	2	AG	25	9	58	2648	2706
f3p60_2590_2507	1	2	TC	9	2336	2353	237	2590
f2p60_2612_2522	1	3	TGC	6	923	940	1672	2612
f3p60_2590_2523	1	3	TCG	12	182	217	2373	2590
f2p60_2588_2530	1	2	TA	15	958	987	1601	2588
f3p60_2592_2531	1	2	TC	13	2207	2232	360	2592
f3p60_2586_2543	1	2	AG	20	29	68	2518	2586
f2p60_2607_2546	1	2	AG	10	42	61	2546	2607
f2p60_2607_2546	2	2	AT	9	2320	2337	270	2607
f2p19_2569_2557	1	2	AG	9	78	95	2474	2569
f2p19_2569_2557	2	3	AAG	6	259	276	2293	2569
f2p60_2581_2563	1	2	TC	11	51	72	2509	2581
f2p60_2581_2563	2	3	ACC	6	653	670	1911	2581
f2p60_2577_2566	1	2	AC	9	2054	2071	506	2577
f2p46_2571_2567	1	3	AGA	6	117	134	2437	2571
f2p46_2571_2567	2	3	AGC	7	234	254	2317	2571
f10p60_2582_2570	1	2	AG	9	48	65	2517	2582
f10p60_2582_2570	2	3	AAG	6	229	246	2336	2582
f10p60_2582_2570	3	3	TAA	8	2514	2537	45	2582
f5p60_2573_2578	1	2	AG	10	2199	2218	355	2573
f2p34_2563_2596	1	3	GCA	8	459	482	2081	2563
f2p34_2563_2596	2	3	CAG	6	1746	1763	800	2563
f2p60_2550_2628	1	2	AT	27	2029	2082	468	2550
f4p60_2568_2636	1	2	TA	11	2356	2377	191	2568
f2p47_2574_2638	1	3	AAG	6	173	190	2384	2574
f2p47_2574_2638	2	3	TAA	8	2458	2481	93	2574
f2p52_2569_2650	1	2	AG	20	3	42	2527	2569
f3p60_2551_2656	1	2	GA	9	11	28	2523	2551
f3p60_2533_2669	1	3	ATC	7	90	110	2423	2533
f3p60_2524_2674	1	2	AT	11	198	219	2305	2524
f3p60_2541_2675	1	2	TA	10	70	89	2452	2541
f2p25_2530_2677	1	2	AG	11	57	78	2452	2530
f2p60_2536_2682	1	2	AG	9	43	60	2476	2536
f3p60_2542_2690	1	3	AGA	6	53	70	2472	2542
f3p60_2542_2690	2	3	AGC	7	170	190	2352	2542
f3p57_2529_2698	1	2	CT	10	148	167	2362	2529
f2p17_2523_2700	1	3	TCA	6	108	125	2398	2523
f2p60_2506_2709	1	2	TC	9	292	309	2197	2506
f4p60_2537_2718	1	3	TTA	12	2470	2505	32	2537
f5p60_2520_2719	1	3	CTC	7	75	95	2425	2520
f5p60_2520_2719	2	3	CCA	10	95	124	2396	2520
f2p23_2606_2745	1	4	AGAC	5	80	99	2507	2606
f9p60_2512_2752	1	2	TC	9	292	309	2203	2512
f3p59_2484_2758	1	3	AAG	6	316	333	2151	2484
f4p60_2509_2765	1	2	AG	9	154	171	2338	2509
f2p50_2536_2766	1	3	ACA	6	326	343	2193	2536
f2p34_2588_2771	1	3	GTG	7	664	684	1904	2588
f2p60_2490_2777	1	3	ATC	7	91	111	2379	2490
f2p17_2485_2791	1	2	TC	10	80	99	2386	2485
f2p60_2519_2798	1	3	GAA	6	185	202	2317	2519
f2p60_2488_2803	1	3	CAT	6	98	115	2373	2488
f3p60_2516_2804	1	2	CT	9	46	63	2453	2516
f3p60_2516_2804	2	3	AGC	6	162	179	2337	2516
f2p60_2479_2805	1	2	CT	9	44	61	2418	2479
f3p60_2470_2818	1	2	GA	13	6	31	2439	2470
f2p60_2472_2826	1	3	CAC	6	224	241	2231	2472
f2p60_2472_2826	2	3	CTC	7	250	270	2202	2472
f2p53_2472_2835	1	2	TC	13	2216	2241	231	2472
f3p36_2498_2840	1	3	AAG	6	192	209	2289	2498
f2p60_2452_2866	1	3	CAG	6	224	241	2211	2452
f6p60_2474_2868	1	2	GA	9	13	30	2444	2474
f2p51_2457_2874	1	3	ATC	7	91	111	2346	2457
f4p60_2455_2880	1	3	ATC	11	91	123	2332	2455
f2p47_2500_2883	1	3	CAG	6	1556	1573	927	2500
f2p60_2457_2890	1	3	ACA	7	282	302	2155	2457
f3p60_2436_2891	1	2	TC	13	436	461	1975	2436
f4p60_2439_2896	1	3	ATC	7	91	111	2328	2439
f2p28_2446_2927	1	3	AAG	6	95	112	2334	2446
f2p28_2446_2927	2	3	TAA	8	2380	2403	43	2446
f10p60_2411_2930	1	2	GT	14	1	28	2383	2411
f10p60_2411_2930	2	2	GA	16	29	60	2351	2411
f3p29_2445_2932	1	3	CAG	7	191	211	2234	2445
f2p60_2476_2934	1	2	TC	10	82	101	2375	2476
f3p42_2415_2945	1	3	CAG	13	652	690	1725	2415
f2p60_2440_2947	1	2	AG	10	18	37	2403	2440
f2p47_2416_2948	1	3	ACC	8	506	529	1887	2416
f4p60_2123_2950	1	2	CT	12	39	62	2061	2123
f2p60_2424_2955	1	4	GCAG	6	65	88	2336	2424
f2p60_2404_2960	1	2	GA	18	1	36	2368	2404
f2p60_2486_2985	1	3	CCT	8	214	237	2249	2486
f2p60_2486_2985	2	4	CCCT	5	332	351	2135	2486
f3p46_2408_2986	1	3	CTC	9	343	369	2039	2408
f2p27_2408_3011	1	3	GCT	6	397	414	1994	2408
f2p28_2400_3019	1	2	CT	9	39	56	2344	2400
f2p28_2400_3019	2	3	AGC	6	154	171	2229	2400
f3p60_2379_3033	1	3	CTC	9	251	277	2102	2379
f7p60_2365_3046	1	3	GCT	6	377	394	1971	2365
f4p60_2356_3047	1	2	GT	14	1	28	2328	2356
f4p60_2356_3047	2	2	GA	13	29	54	2302	2356
f3p60_2378_3053	1	2	AG	9	38	55	2323	2378
f2p60_2131_3056	1	3	AAG	9	43	69	2062	2131
f3p60_2386_3059	1	3	CTG	7	282	302	2084	2386
f2p60_2376_3065	1	3	CCT	6	25	42	2334	2376
f3p60_2366_3070	1	3	GCA	7	652	672	1694	2366
f2p60_2399_3073	1	3	CCT	6	304	321	2078	2399
f2p60_2399_3073	2	3	CTG	8	320	343	2056	2399
f2p60_2363_3074	1	3	CTC	8	129	152	2211	2363
f12p60_2428_3077	1	3	TCT	6	2206	2223	205	2428
f5p60_2355_3078	1	3	CAG	10	636	665	1690	2355
f2p30_2399_3086	1	3	AAG	6	1556	1573	826	2399
f2p60_2362_3092	1	2	CT	11	29	50	2312	2362
f2p60_2356_3094	1	3	CAT	6	467	484	1872	2356
f2p60_2357_3098	1	3	ACC	7	105	125	2232	2357
f2p60_2345_3107	1	3	AGC	6	435	452	1893	2345
f2p12_2356_3110	1	3	CAC	6	465	482	1874	2356
f2p40_2356_3119	1	3	TGC	6	657	674	1682	2356
f2p60_2418_3125	1	3	TCC	6	134	151	2267	2418
f4p56_2343_3131	1	3	GCT	6	381	398	1945	2343
f2p55_2354_3133	1	4	TTTC	5	2135	2154	200	2354
f4p60_2314_3149	1	3	ATT	7	55	75	2239	2314
f3p60_2336_3150	1	3	AGC	6	86	103	2233	2336
f2p60_2340_3160	1	3	GAT	7	1768	1788	552	2340
f2p60_2322_3193	1	2	TC	9	418	435	1887	2322
f2p60_2322_3193	2	3	TGC	9	618	644	1678	2322
f2p60_2334_3254	1	3	AGC	6	69	86	2248	2334
f2p24_2313_3271	1	2	AG	9	34	51	2262	2313
f12p60_2284_3290	1	3	TTG	10	472	501	1783	2284
f12p60_2284_3290	2	3	TTA	7	518	538	1746	2284
f2p34_2277_3314	1	2	TC	18	166	201	2076	2277
f3p60_2264_3339	1	2	CT	10	72	91	2173	2264
f3p60_2268_3361	1	2	AG	19	19	56	2212	2268
f4p51_2317_3371	1	3	ATC	7	146	166	2151	2317
f4p60_2269_3381	1	3	AAG	6	49	66	2203	2269
f2p41_2257_3382	1	2	AG	10	37	56	2201	2257
f5p60_2262_3386	1	2	TC	10	65	84	2178	2262
f2p60_2267_3387	1	3	TTG	10	395	424	1843	2267
f2p60_2267_3387	2	3	TTA	7	441	461	1806	2267
f2p40_2284_3392	1	3	CTT	9	49	75	2209	2284
f2p40_2284_3392	2	3	CTA	6	146	163	2121	2284
f2p60_2262_3399	1	3	TTG	10	395	424	1838	2262
f2p60_2262_3399	2	3	TTA	7	441	461	1801	2262
f3p60_2263_3407	1	3	CAA	8	1885	1908	355	2263
f2p60_2268_3422	1	3	ATC	11	83	115	2153	2268
f6p60_2235_3424	1	2	AG	9	35	52	2183	2235
f2p45_2296_3431	1	3	TGG	6	158	175	2121	2296
f5p60_2294_3437	1	3	GAT	7	1771	1791	503	2294
f2p32_2230_3450	1	3	CAC	6	335	352	1878	2230
f4p60_2260_3466	1	3	ATT	9	13	39	2221	2260
f2p60_2227_3475	1	3	CTT	9	48	74	2153	2227
f2p60_2227_3475	2	3	CTA	6	145	162	2065	2227
f2p53_2233_3482	1	2	TC	9	21	38	2195	2233
f2p60_2215_3483	1	3	AGC	6	182	199	2016	2215
f2p39_2227_3485	1	2	AG	14	21	48	2179	2227
f2p39_2227_3485	2	3	CCA	6	1763	1780	447	2227
f3p18_2227_3488	1	3	TTG	10	467	496	1731	2227
f3p18_2227_3488	2	3	TTA	7	513	533	1694	2227
f2p21_2276_3499	1	3	GAT	6	429	446	1830	2276
f2p60_2217_3516	1	3	AAG	8	332	355	1862	2217
f2p28_2224_3518	1	3	GCA	7	1641	1661	563	2224
f2p28_2224_3518	2	3	GAT	7	1662	1682	542	2224
f4p60_2213_3524	1	2	TC	10	167	186	2027	2213
f3p60_2228_3536	1	2	TC	18	167	202	2026	2228
f2p60_2210_3539	1	3	GCA	7	1641	1661	549	2210
f2p60_2210_3539	2	3	GAT	7	1662	1682	528	2210
f2p40_2219_3552	1	2	CT	16	10	41	2178	2219
f2p60_2210_3571	1	3	AGC	9	133	159	2051	2210
f4p60_2235_3576	1	2	CT	16	69	100	2135	2235
f2p30_1985_3584	1	3	TCT	7	65	85	1900	1985
f3p53_2176_3596	1	2	CT	24	1881	1928	248	2176
f2p38_2187_3597	1	2	CT	11	33	54	2133	2187
f2p60_2200_3600	1	4	AAAT	5	1821	1840	360	2200
f2p58_2179_3617	1	3	AAG	7	40	60	2119	2179
f2p44_2315_3622	1	2	AG	9	59	76	2239	2315
f3p34_2179_3640	1	4	TCCC	5	252	271	1908	2179
f2p39_2162_3650	1	3	AGC	9	127	153	2009	2162
f2p60_2180_3651	1	3	ATT	9	20	46	2134	2180
f2p60_2186_3667	1	2	AG	17	75	108	2078	2186
f6p60_2177_3673	1	3	ATC	11	95	127	2050	2177
f6p60_2168_3677	1	3	CAC	8	471	494	1674	2168
f2p57_2167_3682	1	4	TTTA	5	2100	2119	48	2167
f5p60_2166_3691	1	3	ATC	7	90	110	2056	2166
f2p60_2165_3696	1	3	GCT	6	190	207	1958	2165
f2p60_2156_3702	1	3	TTC	7	351	371	1785	2156
f2p60_2151_3719	1	4	TTTG	5	1878	1897	254	2151
f6p60_2155_3741	1	3	AGC	9	134	160	1995	2155
f2p60_2139_3751	1	3	AAG	8	41	64	2075	2139
f2p48_2138_3762	1	2	TC	9	20	37	2101	2138
f5p60_2144_3764	1	2	CT	9	330	347	1797	2144
f2p40_2133_3778	1	3	CCT	6	45	62	2071	2133
f6p60_2128_3783	1	3	AAG	8	48	71	2057	2128
f2p21_2114_3804	1	3	CGA	7	244	264	1850	2114
f2p60_2111_3834	1	2	GA	11	7	28	2083	2111
f3p60_2101_3846	1	2	GA	16	1	32	2069	2101
f3p60_2111_3868	1	2	AC	9	31	48	2063	2111
f7p60_2208_3872	1	4	TGTC	5	2037	2056	152	2208
f2p42_2102_3881	1	3	CAG	7	1245	1265	837	2102
f2p60_2087_3895	1	3	TCT	6	1992	2009	78	2087
f2p47_2098_3896	1	4	GAAA	5	131	150	1948	2098
f2p15_2111_3912	1	2	AG	9	74	91	2020	2111
f2p60_2083_3917	1	2	TA	26	1761	1812	271	2083
f3p60_2099_3948	1	2	GA	18	72	107	1992	2099
f3p60_2078_3951	1	2	GA	14	36	63	2015	2078
f2p19_2080_3956	1	2	TG	13	34	59	2021	2080
f3p60_2060_3978	1	3	ACG	6	123	140	1920	2060
f3p60_2060_3978	2	3	AAG	6	585	602	1458	2060
f3p60_2072_3983	1	3	TCC	6	88	105	1967	2072
f2p23_2072_3984	1	3	CCA	10	258	287	1785	2072
f2p47_2073_3989	1	2	TC	10	28	47	2026	2073
f3p60_2089_4005	1	2	GA	13	308	333	1756	2089
f2p60_2072_4007	1	2	AG	16	38	69	2003	2072
f8p60_2054_4008	1	4	ATAA	5	16	35	2019	2054
f2p45_2060_4011	1	2	TC	11	117	138	1922	2060
f2p45_2060_4011	2	3	AAG	7	1277	1297	763	2060
f2p45_2060_4011	3	3	AAG	8	1511	1534	526	2060
f2p41_2061_4016	1	3	TGG	8	1563	1586	475	2061
f2p60_2068_4022	1	4	AGCG	5	161	180	1888	2068
f3p60_2060_4024	1	4	GAAA	5	133	152	1908	2060
f2p60_2071_4053	1	2	GA	12	6	29	2042	2071
f2p60_2067_4060	1	3	TTG	10	270	299	1768	2067
f2p60_2067_4060	2	3	TTA	7	316	336	1731	2067
f4p60_2060_4068	1	3	CAC	7	101	121	1939	2060
f4p60_2051_4069	1	3	GTG	6	326	343	1708	2051
f2p33_2052_4076	1	3	GCT	6	1224	1241	811	2052
f2p37_2049_4110	1	2	GA	9	161	178	1871	2049
f7p60_2049_4131	1	3	CCT	7	21	41	2008	2049
f2p60_2042_4139	1	2	CA	10	230	249	1793	2042
f2p60_2042_4139	2	2	TC	10	1477	1496	546	2042
f2p60_2040_4147	1	3	GCT	6	1225	1242	798	2040
f2p45_2049_4158	1	3	TGG	8	1578	1601	448	2049
f4p60_2026_4160	1	4	GAAA	5	133	152	1874	2026
f3p60_2019_4168	1	2	GA	16	286	317	1702	2019
f2p60_2020_4170	1	3	ATC	6	38	55	1965	2020
f5p60_2035_4179	1	2	TC	9	87	104	1931	2035
f2p60_2011_4202	1	3	CTT	6	150	167	1844	2011
f3p60_2017_4229	1	2	AG	12	121	144	1873	2017
f5p60_2009_4232	1	3	TCT	6	63	80	1929	2009
f3p60_2051_4233	1	3	TCT	7	163	183	1868	2051
f2p60_2042_4251	1	3	ACC	6	96	113	1929	2042
f2p60_2007_4254	1	3	GAG	9	136	162	1845	2007
f2p60_2010_4257	1	3	ATT	6	182	199	1811	2010
f3p60_1999_4295	1	3	TGA	12	1784	1819	180	1999
f2p31_1994_4299	1	2	CA	11	228	249	1745	1994
f2p31_1994_4299	2	2	TC	17	1478	1511	483	1994
f2p26_1992_4300	1	2	CA	10	233	252	1740	1992
f2p26_1992_4300	2	2	TC	10	1480	1499	493	1992
f2p18_1996_4309	1	3	CCT	7	21	41	1955	1996
f4p60_1995_4331	1	2	AG	18	3	38	1957	1995
f2p18_2015_4351	1	3	CAC	11	57	89	1926	2015
f2p60_1978_4371	1	4	AATC	7	145	172	1806	1978
f3p52_1981_4378	1	2	CA	10	228	247	1734	1981
f3p52_1981_4378	2	2	TC	10	1475	1494	487	1981
f3p60_1982_4384	1	4	CTGT	7	1807	1834	148	1982
f3p60_1968_4398	1	2	CT	10	35	54	1914	1968
f2p60_1970_4403	1	3	AGA	7	1733	1753	217	1970
f2p60_1963_4413	1	2	AG	10	139	158	1805	1963
f9p60_2008_4427	1	3	TCT	6	40	57	1951	2008
f2p60_1965_4431	1	3	TGA	10	1784	1813	152	1965
f3p60_1963_4441	1	3	ACC	8	93	116	1847	1963
f4p33_1984_4447	1	3	CAC	9	374	400	1584	1984
f4p33_1984_4447	2	3	CCA	6	424	441	1543	1984
f5p60_1970_4450	1	2	TC	9	83	100	1870	1970
f2p59_1962_4472	1	3	GAT	6	100	117	1845	1962
f2p59_1962_4472	2	3	TGG	6	196	213	1749	1962
f4p60_1939_4507	1	3	CGG	7	570	590	1349	1939
f2p60_1947_4525	1	3	TGG	8	1470	1493	454	1947
f2p60_1954_4535	1	2	CT	11	38	59	1895	1954
f2p60_1935_4546	1	3	AAG	8	1850	1873	62	1935
f2p38_1928_4573	1	3	TCT	6	109	126	1802	1928
f2p20_1937_4575	1	2	TA	9	1674	1691	246	1937
f2p60_1968_4576	1	3	CTC	9	93	119	1849	1968
f2p60_1980_4613	1	3	GAA	6	310	327	1653	1980
f8p60_1932_4615	1	2	AG	9	49	66	1866	1932
f2p60_1919_4660	1	3	GAA	6	28	45	1874	1919
f3p41_1913_4673	1	2	TC	17	43	76	1837	1913
f2p14_1902_4696	1	2	GA	14	36	63	1839	1902
f2p28_1919_4698	1	3	ACC	6	96	113	1806	1919
f11p60_1918_4703	1	3	AAG	8	1851	1874	44	1918
f2p60_1908_4729	1	2	TC	12	24	47	1861	1908
f3p60_1909_4739	1	3	CCT	7	23	43	1866	1909
f2p19_1913_4749	1	2	TC	9	130	147	1766	1913
f33p60_1920_4766	1	2	AC	10	1	20	1900	1920
f2p60_1893_4810	1	3	TCT	8	301	324	1569	1893
f2p60_1880_4817	1	2	CT	10	460	479	1401	1880
f3p50_1863_4819	1	2	TA	9	1634	1651	212	1863
f13p60_1871_4829	1	3	GGA	6	408	425	1446	1871
f3p60_1964_4855	1	2	CT	18	48	83	1881	1964
f12p60_1877_4856	1	3	TAG	6	277	294	1583	1877
f2p34_1903_4867	1	2	AG	14	16	43	1860	1903
f2p60_1860_4877	1	3	TGA	9	1787	1813	47	1860
f2p60_1879_4879	1	3	ATT	6	145	162	1717	1879
f2p60_1869_4893	1	3	TTC	6	87	104	1765	1869
f4p57_1882_4900	1	2	GA	15	126	155	1727	1882
f2p26_1857_4922	1	3	CAG	6	356	373	1484	1857
f2p26_1857_4922	2	3	ATC	6	456	473	1384	1857
f6p60_1861_4937	1	3	TAG	7	275	295	1566	1861
f2p24_1860_4948	1	3	GAG	7	150	170	1690	1860
f6p60_1876_4958	1	2	GA	15	126	155	1721	1876
f3p60_1856_4965	1	2	CT	9	153	170	1686	1856
f8p60_1927_4967	1	2	GA	9	1	18	1909	1927
f2p60_1851_4979	1	2	AG	10	26	45	1806	1851
f2p60_1844_5007	1	4	TGTC	5	1676	1695	149	1844
f2p27_1840_5052	1	3	CAG	10	1177	1206	634	1840
f4p60_1846_5058	1	3	GAG	6	49	66	1780	1846
f3p51_1830_5082	1	3	CCA	6	692	709	1121	1830
f3p51_1830_5082	2	3	CCA	6	893	910	920	1830
f8p60_1831_5094	1	2	GA	15	37	66	1765	1831
f2p60_1825_5106	1	2	AG	11	26	47	1778	1825
f2p57_1830_5111	1	2	TC	10	60	79	1751	1830
f3p60_1815_5113	1	3	CAT	6	122	139	1676	1815
f2p12_1738_5119	1	3	AGC	8	39	62	1676	1738
f3p34_1791_5146	1	2	AT	10	1582	1601	190	1791
f2p60_1828_5151	1	3	GGT	8	113	136	1692	1828
f2p45_1815_5172	1	3	AGC	6	27	44	1771	1815
f2p60_1812_5186	1	3	TCC	9	721	747	1065	1812
f2p60_1823_5187	1	3	CAA	7	837	857	966	1823
f2p48_1810_5191	1	3	GGT	7	162	182	1628	1810
f4p60_1721_5210	1	2	GA	12	1	24	1697	1721
f2p26_1806_5222	1	3	AAG	7	160	180	1626	1806
f6p60_1816_5234	1	3	TTA	9	1583	1609	207	1816
f2p60_1805_5238	1	3	AAG	7	311	331	1474	1805
f2p43_1803_5241	1	4	CTCC	5	35	54	1749	1803
f2p60_1826_5246	1	2	TC	9	269	286	1540	1826
f9p60_1789_5252	1	3	AAG	7	1088	1108	681	1789
f2p38_1799_5266	1	3	CAC	6	371	388	1411	1799
f3p22_1799_5271	1	3	AAC	7	266	286	1513	1799
f7p60_1797_5301	1	2	TC	12	595	618	1179	1797
f7p60_1797_5301	2	2	TA	11	826	847	950	1797
f2p60_1806_5302	1	2	GA	14	36	63	1743	1806
f4p60_1797_5320	1	3	TAG	6	201	218	1579	1797
f3p60_1788_5325	1	2	TA	11	1611	1632	156	1788
f4p60_1801_5347	1	3	TAG	7	170	190	1611	1801
f2p60_1778_5406	1	3	ATG	6	865	882	896	1778
f5p60_1809_5416	1	3	AAG	7	1104	1124	685	1809
f2p39_1785_5424	1	2	CT	10	141	160	1625	1785
f2p22_1782_5433	1	2	GA	10	101	120	1662	1782
f2p60_1765_5455	1	3	CCT	6	234	251	1514	1765
f7p60_1784_5468	1	3	CCA	6	559	576	1208	1784
f7p60_1784_5468	2	3	CCA	6	760	777	1007	1784
f2p24_1805_5469	1	3	CAC	8	230	253	1552	1805
f19p60_1757_5478	1	2	TC	14	23	50	1707	1757
f3p60_1749_5503	1	3	CCT	6	238	255	1494	1749
f2p60_1825_5514	1	3	AGA	6	1268	1285	540	1825
f3p60_1744_5535	1	4	AATA	5	205	224	1520	1744
f4p60_1747_5577	1	2	GA	16	12	43	1704	1747
f2p60_1740_5581	1	2	CT	10	136	155	1585	1740
f3p60_1764_5589	1	2	CT	19	114	151	1613	1764
f2p60_1756_5630	1	3	TTC	6	40	57	1699	1756
f2p59_1732_5655	1	3	GGT	8	113	136	1596	1732
f3p60_1744_5679	1	3	ATT	7	1532	1552	192	1744
f2p60_1725_5694	1	2	TC	10	1223	1242	483	1725
f5p60_1728_5699	1	2	CT	10	141	160	1568	1728
f17p60_1722_5707	1	3	CCA	6	555	572	1150	1722
f17p60_1722_5707	2	3	CCA	6	756	773	949	1722
f2p60_1770_5716	1	3	ATA	7	1570	1590	180	1770
f3p60_1722_5721	1	3	TAG	6	265	282	1440	1722
f13p60_1763_5728	1	3	TTA	10	1581	1610	153	1763
f2p43_1720_5742	1	3	TTA	6	133	150	1570	1720
f3p60_1718_5821	1	2	AG	9	248	265	1453	1718
f211p60_1696_5824	1	3	CCA	6	555	572	1124	1696
f211p60_1696_5824	2	3	CCA	6	756	773	923	1696
f4p60_1710_5863	1	3	CCT	6	89	106	1604	1710
f2p32_1708_5887	1	3	CCT	7	421	441	1267	1708
f2p32_1708_5887	2	3	AAT	6	1592	1609	99	1708
f2p14_1717_5889	1	3	CAC	6	69	86	1631	1717
f2p41_1696_5904	1	3	GAA	6	117	134	1562	1696
f2p60_1691_5907	1	3	CCT	6	286	303	1388	1691
f2p23_1695_5908	1	3	CAG	9	1349	1375	320	1695
f2p60_1706_5909	1	3	GGT	6	615	632	1074	1706
f2p60_1693_5946	1	2	AG	13	22	47	1646	1693
f2p60_1717_5961	1	3	CAG	9	1348	1374	343	1717
f2p46_1679_5965	1	3	GAG	6	634	651	1028	1679
f4p60_1681_5972	1	3	CCT	7	422	442	1239	1681
f4p60_1681_5972	2	3	AAT	6	1591	1608	73	1681
f2p60_1683_5973	1	2	TC	23	1433	1478	205	1683
f2p60_1686_5977	1	3	TCT	9	137	163	1523	1686
f2p60_1692_5981	1	3	GTG	6	464	481	1211	1692
f3p60_1686_5988	1	3	TAG	6	94	111	1575	1686
f2p35_1675_6008	1	3	CAA	7	133	153	1522	1675
f3p60_1668_6028	1	2	GA	13	10	35	1633	1668
f2p46_1472_6038	1	2	GA	9	124	141	1331	1472
f2p60_1669_6044	1	3	AGA	6	96	113	1556	1669
f2p60_1665_6047	1	2	TA	12	1607	1630	35	1665
f2p60_1663_6057	1	3	CCT	6	239	256	1407	1663
f2p60_1671_6080	1	3	CTC	6	136	153	1518	1671
f2p16_1667_6081	1	3	GAA	6	118	135	1532	1667
f2p54_1669_6105	1	2	AG	11	1375	1396	273	1669
f5p60_1642_6151	1	2	AC	12	1	24	1618	1642
f2p60_1648_6154	1	2	GA	11	279	300	1348	1648
f2p60_1648_6168	1	2	GA	11	10	31	1617	1648
f3p60_1655_6175	1	3	CAT	6	239	256	1399	1655
f4p60_1644_6186	1	3	TCT	8	301	324	1320	1644
f2p60_1654_6189	1	3	CAG	9	1348	1374	280	1654
f3p60_1641_6194	1	3	TAG	7	39	59	1582	1641
f2p58_1659_6206	1	3	GAA	8	26	49	1610	1659
f2p51_1632_6229	1	3	CCA	6	487	504	1128	1632
f2p51_1632_6229	2	3	CCA	6	688	705	927	1632
f2p60_1649_6232	1	3	CAA	6	112	129	1520	1649
f7p60_1626_6247	1	2	TA	9	1428	1445	181	1626
f7p60_1626_6247	2	3	CCA	6	561	578	1048	1626
f4p60_1670_6252	1	3	GAA	6	94	111	1559	1670
f3p60_1641_6270	1	2	AT	11	1558	1579	62	1641
f10p60_1629_6281	1	3	CCA	6	557	574	1055	1629
f10p60_1629_6281	2	3	CCA	6	758	775	854	1629
f2p60_1617_6310	1	2	AT	21	1527	1568	49	1617
f4p60_1633_6313	1	2	CT	17	90	123	1510	1633
f4p56_1635_6327	1	3	GAA	6	94	111	1524	1635
f2p60_1623_6349	1	2	GA	14	6	33	1590	1623
f2p60_1609_6350	1	2	AG	10	32	51	1558	1609
f11p60_1621_6371	1	3	GAA	6	117	134	1487	1621
f2p60_1616_6380	1	3	GAG	7	904	924	692	1616
f3p60_1607_6387	1	2	AG	15	1268	1297	310	1607
f4p60_1604_6400	1	2	GA	21	75	116	1488	1604
f2p60_1609_6405	1	3	CCA	6	559	576	1033	1609
f2p60_1609_6405	2	3	CCA	6	760	777	832	1609
f3p60_1616_6407	1	2	AG	12	88	111	1505	1616
f3p60_1610_6408	1	2	CT	13	174	199	1411	1610
f4p60_1604_6423	1	3	CTT	11	78	110	1494	1604
f4p60_1604_6423	2	3	TGC	6	419	436	1168	1604
f2p60_1598_6443	1	2	AT	10	1265	1284	314	1598
f2p60_1598_6443	2	4	CATA	5	1248	1267	331	1598
f7p60_1587_6463	1	2	TA	9	1432	1449	138	1587
f7p60_1587_6463	2	3	CCA	6	565	582	1005	1587
f2p60_1604_6478	1	3	CAG	9	102	128	1476	1604
f2p60_1604_6478	2	3	AGA	8	139	162	1442	1604
f5p40_1605_6494	1	3	GAG	8	353	376	1229	1605
f3p51_1587_6495	1	2	AG	11	33	54	1533	1587
f4p60_1537_6497	1	3	CTT	8	107	130	1407	1537
f2p60_1591_6510	1	2	AT	11	1459	1480	111	1591
f3p60_1587_6528	1	2	TG	10	1474	1493	94	1587
f2p60_1582_6536	1	2	TC	13	29	54	1528	1582
f13p60_1573_6538	1	3	CCA	6	555	572	1001	1573
f13p60_1573_6538	2	3	CCA	6	756	773	800	1573
f2p60_1588_6559	1	3	GAA	6	64	81	1507	1588
f2p60_1596_6561	1	3	CAG	6	335	352	1244	1596
f4p60_1594_6586	1	3	CAC	9	101	127	1467	1594
f2p60_1586_6625	1	3	AAT	9	82	108	1478	1586
f3p60_1579_6628	1	4	CTGT	7	1400	1427	152	1579
f128p60_1568_6636	1	2	TA	9	1430	1447	121	1568
f128p60_1568_6636	2	3	CCA	6	563	580	988	1568
f2p60_1561_6641	1	3	CCA	6	422	439	1122	1561
f2p60_1561_6641	2	3	CCA	6	623	640	921	1561
f4p60_1580_6649	1	4	TTAT	5	1499	1518	62	1580
f3p60_1561_6653	1	3	GAA	6	115	132	1429	1561
f2p60_1562_6670	1	2	AG	10	90	109	1453	1562
f2p60_1562_6670	2	2	TC	14	1232	1259	303	1562
f3p60_1560_6679	1	2	CT	9	1310	1327	233	1560
f5p60_1564_6707	1	2	GT	14	1450	1477	87	1564
f3p60_1552_6711	1	3	GAG	7	703	723	829	1552
f2p60_1566_6729	1	2	GT	14	1436	1463	103	1566
f2p60_1558_6748	1	3	AAT	11	3	35	1523	1558
f4p60_1584_6757	1	3	TGC	6	188	205	1379	1584
f14p60_1580_6765	1	3	TGC	8	1476	1499	81	1580
f2p51_1540_6776	1	3	GCA	6	617	634	906	1540
f2p52_1545_6778	1	3	GTC	8	98	121	1424	1545
f2p51_1544_6797	1	3	GAA	6	66	83	1461	1544
f2p60_1542_6800	1	2	GA	21	59	100	1442	1542
f2p60_1539_6842	1	3	CCA	6	555	572	967	1539
f2p60_1539_6842	2	3	CCA	6	756	773	766	1539
f3p60_1533_6843	1	2	AG	12	33	56	1477	1533
f4p60_1564_6854	1	3	AGA	8	102	125	1439	1564
f10p60_1535_6862	1	3	CAG	6	64	81	1454	1535
f10p60_1535_6862	2	3	CAA	8	424	447	1088	1535
f2p60_1537_6863	1	2	AG	13	51	76	1461	1537
f2p60_1545_6866	1	3	CCT	7	138	158	1387	1545
f3p60_1528_6867	1	3	AAT	6	1465	1482	46	1528
f3p60_1539_6871	1	3	GCA	7	40	60	1479	1539
f3p60_1539_6871	2	3	CGG	7	122	142	1397	1539
f2p36_1530_6885	1	2	TC	13	1287	1312	218	1530
f6p60_1540_6887	1	2	AG	12	24	47	1493	1540
f2p60_1569_6890	1	3	AAG	6	64	81	1488	1569
f2p53_1527_6912	1	2	AG	12	24	47	1480	1527
f2p60_1524_6917	1	3	CTC	6	971	988	536	1524
f2p60_1524_6917	2	3	CTC	6	1061	1078	446	1524
f4p60_1457_6921	1	3	CCA	6	566	583	874	1457
f2p20_1522_6925	1	2	AG	15	30	59	1463	1522
f7p60_1528_6951	1	2	AT	26	1138	1189	339	1528
f7p60_1528_6951	2	2	AT	12	1290	1313	215	1528
f2p13_1549_6968	1	2	TC	9	31	48	1501	1549
f2p13_1549_6968	2	3	AGG	7	286	306	1243	1549
f2p13_1549_6968	3	3	GAT	6	550	567	982	1549
f2p37_1525_6975	1	3	AAT	11	82	114	1411	1525
f4p60_1519_6997	1	3	TGC	6	1421	1438	81	1519
f3p60_1506_7014	1	2	CT	9	159	176	1330	1506
f3p60_1509_7018	1	2	AG	9	9	26	1483	1509
f5p60_1506_7019	1	3	TGC	6	305	322	1184	1506
f5p60_1512_7023	1	2	AG	12	33	56	1456	1512
f3p60_1498_7041	1	2	AT	18	1137	1172	326	1498
f3p60_1498_7041	2	2	AT	11	1273	1294	204	1498
f2p60_1500_7058	1	2	AG	15	30	59	1441	1500
f2p60_1508_7067	1	3	GTC	8	98	121	1387	1508
f9p60_1502_7073	1	2	TA	9	1369	1386	116	1502
f9p60_1502_7073	2	3	CCA	6	562	579	923	1502
f5p60_1502_7078	1	2	TA	9	1432	1449	53	1502
f5p60_1502_7078	2	3	CCA	6	565	582	920	1502
f2p32_1525_7084	1	2	CA	10	247	266	1259	1525
f2p60_1508_7106	1	4	TTTC	5	1369	1388	120	1508
f2p43_1493_7110	1	3	GAG	7	463	483	1010	1493
f2p37_1507_7173	1	3	CCA	6	559	576	931	1507
f2p60_1488_7183	1	3	AGC	8	445	468	1020	1488
f10p60_1436_7188	1	4	ATAG	5	10	29	1407	1436
f2p41_1477_7209	1	2	AG	9	9	26	1451	1477
f2p50_1473_7211	1	2	AG	11	46	67	1406	1473
f2p60_1474_7214	1	2	TC	11	56	77	1397	1474
f2p60_1487_7243	1	2	AG	9	38	55	1432	1487
f3p60_1473_7261	1	4	AATC	5	31	50	1423	1473
f9p60_1472_7262	1	2	TC	9	41	58	1414	1472
f9p60_1472_7262	2	3	TCT	6	110	127	1345	1472
f3p55_1467_7265	1	2	TA	24	1279	1326	141	1467
f3p55_1467_7265	2	2	AG	17	1326	1359	108	1467
f4p60_1000_7280	1	2	CT	10	460	479	521	1000
f6p60_1477_7303	1	2	AT	23	1139	1184	293	1477
f6p60_1477_7303	2	2	AT	12	1285	1308	169	1477
f2p8_1495_7321	1	2	AG	17	1162	1195	300	1495
f2p46_1461_7323	1	3	GAC	6	226	243	1218	1461
f2p60_1462_7325	1	3	AAG	7	140	160	1302	1462
f2p60_1453_7329	1	2	AG	10	47	66	1387	1453
f2p53_1469_7340	1	2	AG	12	20	43	1426	1469
f7p60_1474_7349	1	3	TTA	7	1232	1252	222	1474
f7p60_1452_7359	1	2	CT	18	24	59	1393	1452
f7p60_1409_7371	1	2	CT	18	24	59	1350	1409
f2p34_1446_7373	1	3	CCA	6	309	326	1120	1446
f2p34_1446_7373	2	3	CCA	6	510	527	919	1446
f2p60_1443_7385	1	3	AAG	8	60	83	1360	1443
f4p60_1447_7393	1	3	GAG	7	463	483	964	1447
f2p35_1440_7403	1	2	AG	12	200	223	1217	1440
f2p60_1457_7420	1	2	AG	23	3	48	1409	1457
f2p42_1437_7432	1	2	AG	10	48	67	1370	1437
f3p60_1435_7453	1	3	CCA	9	70	96	1339	1435
f9p60_1440_7455	1	2	AG	12	226	249	1191	1440
f2p60_1437_7477	1	3	GCC	6	385	402	1035	1437
f3p60_1433_7478	1	2	CT	17	24	57	1376	1433
f4p60_1434_7492	1	3	CCA	6	561	578	856	1434
f4p60_1450_7505	1	3	GGC	7	756	776	674	1450
f2p60_1431_7524	1	3	GAG	7	31	51	1380	1431
f2p30_1432_7525	1	3	TTC	7	90	110	1322	1432
f5p60_1420_7539	1	2	GA	13	12	37	1383	1420
f2p60_1430_7549	1	3	AGC	8	442	465	965	1430
f2p60_1418_7553	1	3	AGC	6	989	1006	412	1418
f2p60_1437_7561	1	3	TGC	6	272	289	1148	1437
f4p60_1430_7570	1	3	CTT	6	188	205	1225	1430
f2p57_1424_7576	1	4	CTGT	7	1245	1272	152	1424
f5p60_1433_7588	1	2	TA	9	1332	1349	84	1433
f2p60_1418_7595	1	3	GCT	7	33	53	1365	1418
f6p60_1417_7602	1	3	AAT	7	1352	1372	45	1417
f2p60_1413_7607	1	2	AG	14	289	316	1097	1413
f2p60_1428_7632	1	4	CTCC	5	1206	1225	203	1428
f2p60_1422_7633	1	2	TA	12	1294	1317	105	1422
f2p60_1422_7633	2	3	AGC	6	1005	1022	400	1422
f3p60_1411_7634	1	2	GA	14	1	28	1383	1411
f2p60_1429_7640	1	3	AGA	6	30	47	1382	1429
f3p48_1301_7643	1	3	CAC	8	38	61	1240	1301
f2p60_1411_7673	1	3	CAC	6	86	103	1308	1411
f2p60_1425_7698	1	3	CCA	6	481	498	927	1425
f2p50_1398_7737	1	4	TCCC	6	153	176	1222	1398
f2p12_1399_7741	1	3	CAG	7	622	642	757	1399
f2p12_1399_7741	2	3	GCA	6	723	740	659	1399
f2p30_1400_7748	1	2	GA	20	23	62	1338	1400
f2p60_1398_7750	1	2	GA	9	41	58	1340	1398
f2p60_1387_7764	1	2	AC	14	1	28	1359	1387
f2p60_1397_7767	1	2	AG	11	204	225	1172	1397
f2p47_1391_7771	1	3	CAA	6	421	438	953	1391
f3p60_1402_7782	1	2	GA	10	83	102	1300	1402
f3p60_1402_7782	2	2	GA	10	1240	1259	143	1402
f9p60_1393_7784	1	3	GCT	7	65	85	1308	1393
f6p60_1404_7812	1	3	CTC	10	54	83	1321	1404
f6p60_1404_7812	2	3	TAT	9	1326	1352	52	1404
f4p60_1386_7813	1	4	TCCC	5	157	176	1210	1386
f2p60_1394_7823	1	2	GA	15	9	38	1356	1394
f2p60_1399_7830	1	2	GA	13	31	56	1343	1399
f3p60_1392_7837	1	2	CT	16	49	80	1312	1392
f2p60_1376_7874	1	2	AG	9	22	39	1337	1376
f5p60_1335_7888	1	3	ACC	6	1140	1157	178	1335
f2p60_1236_7900	1	3	CCA	7	422	442	794	1236
f2p60_1415_7914	1	3	AGA	8	55	78	1337	1415
f2p60_1404_7921	1	2	AT	23	1165	1210	194	1404
f3p60_1373_7925	1	2	GA	21	22	63	1310	1373
f3p60_1363_7945	1	2	TC	22	35	78	1285	1363
f2p60_1367_7948	1	3	CAG	6	246	263	1104	1367
f3p60_1369_7974	1	3	ACC	6	1133	1150	219	1369
f2p14_1384_7981	1	3	ACC	6	1134	1151	233	1384
f2p30_1360_7982	1	3	GAG	7	463	483	877	1360
f2p60_1366_7985	1	3	CCA	6	1145	1162	204	1366
f2p60_1361_7991	1	2	GA	15	3	32	1329	1361
f2p60_1366_8040	1	2	AG	15	39	68	1298	1366
f2p31_1362_8056	1	2	GA	11	65	86	1276	1362
f2p41_1376_8082	1	2	TA	9	1185	1202	174	1376
f2p60_1348_8109	1	3	AGA	10	378	407	941	1348
f2p60_1368_8129	1	3	TAA	6	383	400	968	1368
f6p60_1343_8130	1	2	TC	21	1117	1158	185	1343
f5p60_1353_8139	1	2	TC	10	26	45	1308	1353
f3p60_1336_8152	1	3	ACC	6	1132	1149	187	1336
f2p60_1339_8181	1	3	CTC	6	298	315	1024	1339
f4p60_1325_8200	1	3	CCA	6	476	493	832	1325
f2p60_1380_8213	1	2	TC	14	1114	1141	239	1380
f2p60_1380_8213	2	2	TA	9	1156	1173	207	1380
f2p35_1327_8230	1	3	TAA	6	311	328	999	1327
f2p59_1337_8249	1	3	TGA	6	1033	1050	287	1337
f3p24_1342_8250	1	3	TTC	6	334	351	991	1342
f2p60_1318_8257	1	3	GCA	8	299	322	996	1318
f2p60_1318_8257	2	3	TTA	8	1061	1084	234	1318
f2p60_1318_8257	3	3	TTA	8	1148	1171	147	1318
f2p60_1340_8266	1	3	ATG	6	1247	1264	76	1340
f2p60_1325_8270	1	3	TGC	8	1227	1250	75	1325
f2p60_1319_8330	1	4	CCTC	5	82	101	1218	1319
f3p60_1314_8336	1	3	TTC	7	51	71	1243	1314
f2p60_1345_8350	1	2	TA	10	1164	1183	162	1345
f2p60_1324_8360	1	3	AGG	7	1038	1058	266	1324
f6p60_1310_8380	1	2	TC	13	1117	1142	168	1310
f6p60_1310_8380	2	2	TA	9	1157	1174	136	1310
f2p60_1310_8386	1	4	AATA	5	1175	1194	116	1310
f2p60_1308_8392	1	4	TGTC	5	1138	1157	151	1308
f5p60_1309_8408	1	3	AGC	8	474	497	812	1309
f6p60_1320_8417	1	2	TA	9	1188	1205	115	1320
f6p60_1320_8417	2	3	CCA	6	321	338	982	1320
f3p60_1303_8424	1	4	TCTT	5	196	215	1088	1303
f2p60_1339_8441	1	3	GCA	7	126	146	1193	1339
f2p60_1304_8455	1	4	TGTT	5	1114	1133	171	1304
f3p60_1275_8474	1	2	AT	23	1037	1082	193	1275
f3p60_1311_8503	1	4	AGCT	5	37	56	1255	1311
f2p49_1291_8570	1	3	TTC	6	1103	1120	171	1291
f2p60_1299_8602	1	3	TTC	7	59	79	1220	1299
f3p60_1281_8622	1	3	TGC	6	1158	1175	106	1281
f12p60_1256_8637	1	3	CAT	6	1002	1019	237	1256
f9p60_1305_8671	1	3	CAG	7	533	553	752	1305
f2p45_1271_8684	1	3	CTC	6	162	179	1092	1271
f3p60_1266_8712	1	3	TTC	6	1104	1121	145	1266
f4p60_1288_8731	1	2	TC	14	31	58	1230	1288
f2p60_1266_8745	1	2	AG	12	5	28	1238	1266
f2p60_1272_8754	1	2	TC	17	51	84	1188	1272
f8p60_1270_8755	1	2	GA	14	91	118	1152	1270
f3p60_1268_8765	1	3	CTC	6	962	979	289	1268
f6p60_1277_8781	1	2	AG	15	97	126	1151	1277
f2p60_1267_8835	1	3	CAG	7	419	439	828	1267
f3p60_1272_8854	1	3	CAC	8	153	176	1096	1272
f2p60_1268_8891	1	2	TA	9	1200	1217	51	1268
f2p60_1262_8903	1	3	AAG	11	68	100	1162	1262
f3p60_1292_8924	1	3	GCA	8	339	362	930	1292
f2p29_1247_8952	1	3	AAT	7	18	38	1209	1247
f3p60_1239_8954	1	3	TGA	6	982	999	240	1239
f2p60_1248_8964	1	2	TC	9	51	68	1180	1248
f4p60_1263_8981	1	2	AC	14	30	57	1206	1263
f3p60_1232_8984	1	2	TC	17	50	83	1149	1232
f5p60_1243_8997	1	3	AAG	11	71	103	1140	1243
f2p60_1259_9054	1	2	CT	12	73	96	1163	1259
f2p60_1257_9079	1	3	CAC	8	34	57	1200	1257
f2p60_1263_9088	1	4	AGCT	5	33	52	1211	1263
f2p45_1229_9091	1	3	CCA	6	201	218	1011	1229
f2p60_1220_9098	1	3	CCG	9	900	926	294	1220
f8p60_1221_9120	1	3	CTC	6	960	977	244	1221
f3p60_1243_9127	1	2	AG	18	39	74	1169	1243
f3p60_1223_9146	1	2	TC	16	31	62	1161	1223
f5p60_1223_9149	1	2	GA	18	27	62	1161	1223
f2p60_1218_9162	1	3	AGC	8	474	497	721	1218
f9p60_1224_9173	1	3	TTC	6	338	355	869	1224
f2p60_1216_9186	1	3	CAG	7	1	21	1195	1216
f9p60_1228_9221	1	2	TA	9	1093	1110	118	1228
f9p60_1228_9221	2	3	CCA	6	226	243	985	1228
f2p60_1213_9230	1	3	GAC	10	200	229	984	1213
f5p60_1215_9266	1	3	TTC	6	1050	1067	148	1215
f2p19_1203_9285	1	3	CTC	6	960	977	226	1203
f2p60_1229_9287	1	3	GTT	9	450	476	753	1229
f4p60_1202_9290	1	3	CCA	8	139	162	1040	1202
f2p60_1204_9326	1	2	GA	21	17	58	1146	1204
f2p60_1208_9329	1	3	AAT	6	10	27	1181	1208
f3p60_1195_9336	1	2	GA	15	27	56	1139	1195
f2p60_1203_9344	1	4	GGAA	6	29	52	1151	1203
f2p60_1206_9345	1	3	CCA	7	424	444	762	1206
f2p60_1206_9345	2	3	CAA	6	572	589	617	1206
f2p60_1212_9360	1	3	TTC	7	7	27	1185	1212
f7p60_1200_9379	1	3	TCT	7	176	196	1004	1200
f3p60_1194_9387	1	3	GAG	6	821	838	356	1194
f2p60_1245_9414	1	3	GAC	6	724	741	504	1245
f2p60_1232_9421	1	3	GAC	6	870	887	345	1232
f2p50_1207_9422	1	2	CT	12	43	66	1141	1207
f2p60_1218_9437	1	3	TCC	6	253	270	948	1218
f4p60_1202_9444	1	3	GGT	6	161	178	1024	1202
f2p60_1199_9473	1	2	AG	12	29	52	1147	1199
f2p47_1178_9503	1	3	GAC	9	196	222	956	1178
f2p60_1177_9539	1	3	GAC	9	206	232	945	1177
f2p59_1174_9543	1	3	AAG	8	50	73	1101	1174
f11p60_1043_9561	1	3	AAG	7	37	57	986	1043
f2p60_1173_9567	1	3	TCA	7	23	43	1130	1173
f2p60_1193_9594	1	2	CT	10	6	25	1168	1193
f3p60_1199_9596	1	4	ATCG	5	76	95	1104	1199
f3p60_1169_9603	1	3	ATA	8	1076	1099	70	1169
f2p60_1161_9607	1	3	TGC	8	419	442	719	1161
f5p60_1170_9615	1	3	CAG	8	557	580	590	1170
f2p60_1167_9642	1	2	TA	9	970	987	180	1167
f2p60_1167_9642	2	3	CCA	6	103	120	1047	1167
f4p60_1149_9683	1	2	AT	23	976	1021	128	1149
f3p60_1152_9692	1	3	CAC	6	188	205	947	1152
f2p38_1164_9705	1	3	GGC	7	759	779	385	1164
f6p60_1159_9720	1	3	AAG	8	77	100	1059	1159
f2p60_1149_9721	1	3	GAC	6	829	846	303	1149
f2p60_1162_9730	1	3	CCT	10	39	68	1094	1162
f2p56_1148_9746	1	3	AGA	6	688	705	443	1148
f93p60_1153_9777	1	3	AAG	11	77	109	1044	1153
f2p60_1163_9798	1	4	ATCG	5	81	100	1063	1163
f2p60_1142_9806	1	2	TC	15	958	987	155	1142
f3p60_1180_9836	1	3	TTC	7	6	26	1154	1180
f5p60_1134_9856	1	3	TTC	6	337	354	780	1134
f2p60_1139_9860	1	2	CT	11	33	54	1085	1139
f3p60_1146_9865	1	3	CCT	9	40	66	1080	1146
f2p60_1134_9885	1	2	TA	12	926	949	185	1134
f6p60_1136_9886	1	3	CAA	6	722	739	397	1136
f4p60_1142_9890	1	2	AT	10	441	460	682	1142
f4p60_1142_9890	2	3	CCG	6	845	862	280	1142
f5p60_1130_9895	1	3	TGC	8	1029	1052	78	1130
f2p32_1140_9896	1	3	TCC	8	78	101	1039	1140
f2p24_1158_9932	1	3	GGC	6	718	735	423	1158
f4p60_1131_9947	1	3	TGA	6	637	654	477	1131
f2p60_1134_9966	1	2	AG	13	62	87	1047	1134
f2p60_1119_9974	1	2	GA	14	47	74	1045	1119
f2p60_1140_9978	1	3	TCT	7	291	311	829	1140
f5p60_1132_9982	1	3	CAG	8	551	574	558	1132
f2p41_1127_9985	1	4	TCCC	6	72	95	1032	1127
f2p53_1118_9998	1	4	AGAA	7	17	44	1074	1118
f3p60_1159_10004	1	3	AAG	11	44	76	1083	1159
f2p60_1127_10014	1	3	TCT	7	176	196	931	1127
f42p60_1117_10030	1	3	AAG	8	75	98	1019	1117
f2p60_1136_10052	1	3	AAG	6	51	68	1068	1136
f2p60_1136_10052	2	4	GATT	5	83	102	1034	1136
f2p60_1108_10058	1	3	TGC	8	1029	1052	56	1108
f2p60_1117_10065	1	3	CAC	10	343	372	745	1117
f2p60_1108_10068	1	2	GA	14	47	74	1034	1108
f12p60_1132_10073	1	3	CAT	6	1003	1020	112	1132
f7p60_1124_10077	1	3	AAG	6	149	166	958	1124
f2p53_1109_10103	1	3	CCT	9	36	62	1047	1109
f2p11_1147_10132	1	3	CAC	7	155	175	972	1147
f2p60_1104_10138	1	3	AAG	6	169	186	918	1104
f3p60_1102_10193	1	4	TGCT	5	835	854	248	1102
f15p60_1109_10215	1	2	GA	10	122	141	968	1109
f4p60_1102_10217	1	3	CCG	9	784	810	292	1102
f2p60_1061_10232	1	3	AGC	8	265	288	773	1061
f4p60_1103_10273	1	2	CT	15	103	132	971	1103
f2p60_1095_10323	1	3	GCG	8	403	426	669	1095
f2p60_1095_10323	2	3	ATC	6	631	648	447	1095
f2p12_1139_10332	1	3	TCT	7	147	167	972	1139
f2p20_1096_10336	1	4	AAAG	7	23	50	1046	1096
f33p60_1092_10337	1	3	AAG	8	81	104	988	1092
f3p60_1079_10340	1	2	TG	11	730	751	328	1079
f4p60_1085_10352	1	3	CCT	7	67	87	998	1085
f5p60_1089_10359	1	2	CT	14	967	994	95	1089
f2p9_1081_10363	1	2	AC	9	56	73	1008	1081
f2p59_1077_10374	1	3	AGA	6	39	56	1021	1077
f6p60_1093_10380	1	3	CCT	9	39	65	1028	1093
f2p15_1086_10387	1	3	AAG	6	190	207	879	1086
f2p60_1072_10406	1	2	CT	10	25	44	1028	1072
f3p60_1080_10416	1	2	AG	17	10	43	1037	1080
f3p60_1080_10416	2	3	TTC	10	559	588	492	1080
f2p60_1078_10419	1	2	AG	9	13	30	1048	1078
f2p60_1095_10434	1	3	GGT	6	715	732	363	1095
f3p60_1078_10439	1	4	CCCT	5	110	129	949	1078
f2p60_1145_10448	1	2	TC	21	916	957	188	1145
f7p60_1098_10450	1	3	AGC	8	34	57	1041	1098
f2p60_1082_10452	1	2	CT	14	918	945	137	1082
f2p60_1085_10453	1	2	TA	18	993	1028	57	1085
f2p30_1060_10460	1	3	TCC	9	150	176	884	1060
f6p60_1086_10471	1	3	CAA	7	720	740	346	1086
f7p60_1077_10490	1	4	TGCT	5	835	854	223	1077
f4p60_1068_10501	1	2	TA	9	937	954	114	1068
f4p60_1068_10501	2	3	CCA	6	70	87	981	1068
f2p60_1062_10514	1	2	CT	9	36	53	1009	1062
f4p60_1054_10520	1	2	CT	15	66	95	959	1054
f2p17_1065_10522	1	3	TGA	6	633	650	415	1065
f3p60_1057_10528	1	3	GCT	6	172	189	868	1057
f14p60_1068_10554	1	2	CT	13	922	947	121	1068
f2p60_1060_10607	1	3	CCG	9	805	831	229	1060
f10p60_1083_10642	1	3	CAG	8	551	574	509	1083
f2p60_1044_10663	1	2	GA	14	48	75	969	1044
f5p60_1041_10728	1	3	AAT	11	967	999	42	1041
f2p60_1054_10731	1	2	AG	9	76	93	961	1054
f2p45_1046_10735	1	4	TGCT	5	835	854	192	1046
f3p60_1043_10745	1	3	CAC	7	155	175	868	1043
f10p60_1037_10775	1	3	CCT	9	68	94	943	1037
f3p33_860_10781	1	2	TC	10	31	50	810	860
f3p60_1037_10811	1	3	GAC	6	667	684	353	1037
f4p60_1025_10834	1	3	AAG	8	37	60	965	1025
f2p60_1034_10841	1	3	GCC	6	161	178	856	1034
f2p52_1024_10847	1	3	TCC	9	250	276	748	1024
f2p60_1067_10875	1	3	AGG	6	134	151	916	1067
f2p60_1023_10880	1	2	TA	9	858	875	148	1023
f8p60_1039_10901	1	3	TCC	9	550	576	463	1039
f2p60_1020_10919	1	2	TC	14	10	37	983	1020
f4p45_1027_10925	1	2	AG	11	33	54	973	1027
f4p60_1017_10946	1	2	AC	10	84	103	914	1017
f3p60_1000_10949	1	3	AAG	7	37	57	943	1000
f2p60_1029_10982	1	2	TA	9	856	873	156	1029
f2p60_1004_11000	1	2	GA	9	32	49	955	1004
f2p60_1004_11000	2	3	CTC	7	280	300	704	1004
f3p60_1015_11002	1	3	GGT	6	715	732	283	1015
f5p60_1015_11013	1	4	TGCT	5	835	854	161	1015
f5p60_1010_11024	1	3	CAA	7	720	740	270	1010
f3p60_1072_11041	1	4	TTTC	5	849	868	204	1072
f3p60_1011_11047	1	2	TA	10	748	767	244	1011
f2p60_992_11062	1	3	CAG	6	561	578	414	992
f2p60_1011_11073	1	2	CT	14	922	949	62	1011
f3p60_1044_11074	1	2	TC	13	28	53	991	1044
f2p14_1039_11081	1	3	TCC	8	535	558	481	1039
f13p60_1021_11089	1	2	AG	9	122	139	882	1021
f6p60_1010_11098	1	3	CAT	12	390	425	585	1010
f8p60_498_11106	1	2	GA	17	17	50	448	498
f3p60_945_11144	1	2	CT	9	86	103	842	945
f3p60_1008_11167	1	3	GAC	9	206	232	776	1008
f3p60_987_11201	1	3	CGC	8	130	153	834	987
f3p60_983_11216	1	2	TA	25	822	871	112	983
f2p60_985_11217	1	3	AAG	6	87	104	881	985
f2p60_973_11232	1	2	AG	9	25	42	931	973
f2p60_995_11298	1	2	CT	10	23	42	953	995
f7p60_979_11307	1	3	CAA	6	719	736	243	979
f2p60_966_11309	1	2	TA	9	804	821	145	966
f7p60_974_11323	1	3	CCA	6	35	52	922	974
f2p60_980_11331	1	3	TGA	6	408	425	555	980
f2p60_980_11331	2	4	GATC	5	52	71	909	980
f2p60_965_11333	1	3	CCA	7	133	153	812	965
f2p60_1019_11335	1	3	TGA	7	648	668	351	1019
f7p60_944_11358	1	2	AG	14	30	57	887	944
f6p60_976_11361	1	3	CAG	8	99	122	854	976
f2p60_973_11379	1	3	CTC	8	25	48	925	973
f2p60_996_11381	1	2	CT	10	31	50	946	996
f2p60_967_11387	1	3	CAG	6	562	579	388	967
f3p51_931_11388	1	4	CCAG	7	101	128	803	931
f2p21_944_11411	1	2	TA	10	857	876	68	944
f2p25_971_11413	1	2	GA	10	70	89	882	971
f2p60_1014_11422	1	2	TA	10	835	854	160	1014
f9p60_951_11428	1	2	AC	10	1	20	931	951
f2p46_955_11442	1	2	TC	9	250	267	688	955
f2p60_958_11450	1	2	CT	15	67	96	862	958
f2p55_984_11468	1	4	AATC	5	119	138	846	984
f3p25_958_11481	1	3	ATG	6	876	893	65	958
f3p31_979_11517	1	3	CAT	6	121	138	841	979
f2p60_931_11558	1	3	CCA	7	129	149	782	931
f2p43_958_11593	1	3	CTC	6	704	721	237	958
f6p60_955_11596	1	2	AG	15	30	59	896	955
f9p60_949_11626	1	3	CAC	6	177	194	755	949
f3p60_933_11631	1	2	CT	20	36	75	858	933
f2p60_953_11648	1	2	AG	18	52	87	866	953
f8p60_933_11661	1	2	AC	10	57	76	857	933
f4p60_945_11687	1	3	ATG	6	887	904	41	945
f2p60_924_11689	1	2	TC	11	677	698	226	924
f2p60_935_11711	1	2	AG	10	16	35	900	935
f4p60_972_11723	1	2	AT	9	1	18	954	972
f2p60_944_11755	1	2	CT	18	98	133	811	944
f4p60_932_11796	1	2	AG	13	52	77	855	932
f3p60_937_11800	1	3	CAC	6	193	210	727	937
f2p60_941_11802	1	3	ATG	7	599	619	322	941
f2p60_918_11834	1	3	CAC	6	97	114	804	918
f31p60_910_11842	1	3	AAT	8	846	869	41	910
f2p60_900_11853	1	2	GA	17	49	82	818	900
f2p60_918_11887	1	2	AG	10	18	37	881	918
f2p60_892_11909	1	2	TC	12	34	57	835	892
f2p36_899_11922	1	2	GA	10	1	20	879	899
f2p53_897_11956	1	2	TC	10	30	49	848	897
f3p60_928_11978	1	3	CAT	6	197	214	714	928
f3p60_928_11978	2	3	TCT	9	214	240	688	928
f11p60_941_12028	1	2	AG	19	47	84	857	941
f3p60_890_12040	1	3	CAC	9	544	570	320	890
f2p60_894_12050	1	4	TGCT	5	835	854	40	894
f2p60_912_12069	1	3	CAT	6	112	129	783	912
f2p52_876_12088	1	2	GA	9	30	47	829	876
f3p60_885_12148	1	2	TA	11	823	844	41	885
f15p60_898_12156	1	2	TC	13	715	740	158	898
f2p60_909_12209	1	2	TC	10	30	49	860	909
f5p60_875_12212	1	3	CAG	8	24	47	828	875
f2p60_884_12218	1	4	CATC	5	717	736	148	884
f2p60_871_12260	1	2	GA	9	30	47	824	871
f3p60_874_12265	1	2	AG	10	1	20	854	874
f3p60_868_12287	1	2	CT	10	34	53	815	868
f2p60_859_12333	1	3	GAA	7	146	166	693	859
f2p60_859_12373	1	2	GA	12	24	47	812	859
f2p50_853_12374	1	2	AG	11	60	81	772	853
f4p60_849_12393	1	2	GA	12	1	24	825	849
f2p58_850_12456	1	3	ATT	6	789	806	44	850
f5p60_843_12467	1	2	TC	10	30	49	794	843
f4p60_847_12479	1	2	TC	13	710	735	112	847
f2p60_841_12491	1	3	TGC	6	734	751	90	841
f2p42_865_12494	1	3	CAG	6	232	249	616	865
f2p42_865_12494	2	3	GCA	6	294	311	554	865
f2p42_865_12494	3	3	GCA	13	360	398	467	865
f2p42_865_12494	4	3	CAG	7	424	444	421	865
f2p60_845_12507	1	4	TTTC	5	606	625	220	845
f3p60_900_12535	1	2	GA	9	84	101	799	900
f2p60_850_12594	1	2	AG	16	32	63	787	850
f2p60_850_12594	2	3	AGA	12	334	369	481	850
f3p60_827_12606	1	2	TC	11	522	543	284	827
f11p60_831_12621	1	2	GA	9	34	51	780	831
f3p60_827_12683	1	2	GA	9	73	90	737	827
f2p60_824_12686	1	3	CAT	12	222	257	567	824
f2p38_822_12698	1	4	CCAG	7	48	75	747	822
f2p60_830_12701	1	2	AT	22	429	472	358	830
f5p60_826_12729	1	4	AATT	5	770	789	37	826
f2p60_833_12731	1	4	TGCT	5	551	570	263	833
f2p60_821_12736	1	2	AT	9	753	770	51	821
f2p60_819_12737	1	3	GGC	6	498	515	304	819
f2p60_844_12771	1	3	GAA	7	296	316	528	844
f2p60_840_12778	1	3	ATT	9	782	808	32	840
f2p28_837_12827	1	2	TC	10	24	43	794	837
f2p60_823_12843	1	2	AG	10	83	102	721	823
f5p60_814_12844	1	2	AG	13	39	64	750	814
f2p60_805_12871	1	2	AT	24	428	475	330	805
f3p60_827_12878	1	2	TA	10	769	788	39	827
f2p60_804_12889	1	2	TC	10	42	61	743	804
f3p60_806_12944	1	2	AG	11	35	56	750	806
f2p60_796_12947	1	3	ATA	9	701	727	69	796
f2p32_743_12948	1	2	CT	9	49	66	677	743
f2p32_743_12948	2	2	AT	11	73	94	649	743
f3p60_789_12950	1	2	AG	17	35	68	721	789
f11p60_797_12958	1	2	TC	12	19	42	755	797
f2p60_800_12981	1	3	TGG	7	571	591	209	800
f2p60_796_12997	1	2	TC	10	33	52	744	796
f3p60_793_13020	1	3	TCA	11	35	67	726	793
f28p60_788_13049	1	3	CCG	6	495	512	276	788
f2p60_799_13091	1	2	AT	9	696	713	86	799
f3p60_787_13121	1	3	TGA	6	634	651	136	787
f2p60_787_13126	1	2	AG	11	64	85	702	787
f5p60_770_13138	1	3	ATA	9	693	719	51	770
f5p60_796_13151	1	2	AG	17	37	70	726	796
f6p60_773_13170	1	3	AGG	8	11	34	739	773
f7p60_774_13210	1	2	AG	14	59	86	688	774
f2p60_790_13219	1	2	GA	9	15	32	758	790
f23p60_769_13260	1	2	TC	13	61	86	683	769
f3p60_770_13267	1	3	AGC	7	96	116	654	770
f6p60_776_13296	1	2	AG	11	37	58	718	776
f5p60_786_13303	1	2	AG	16	34	65	721	786
f2p60_766_13311	1	3	AAT	11	694	726	40	766
f5p60_757_13349	1	4	AATA	5	698	717	40	757
f7p60_727_13377	1	3	TTA	9	655	681	46	727
f3p60_751_13406	1	2	AG	12	6	29	722	751
f3p60_776_13407	1	4	TGTC	5	608	627	149	776
f25p60_751_13410	1	2	AT	9	696	713	38	751
f10p60_750_13424	1	2	AG	10	35	54	696	750
f4p60_747_13426	1	3	CAG	7	75	95	652	747
f3p60_748_13456	1	3	CTT	10	582	611	137	748
f2p57_753_13497	1	3	GGC	6	467	484	269	753
f46p60_737_13499	1	3	TGA	6	652	669	68	737
f5p60_733_13516	1	3	CCG	6	495	512	221	733
f2p40_737_13517	1	3	ATA	7	57	77	660	737
f2p6_797_13518	1	3	GTT	6	753	770	27	797
f2p60_744_13559	1	3	TTA	9	659	685	59	744
f3p60_731_13572	1	2	AG	11	36	57	674	731
f2p60_737_13585	1	2	TA	9	593	610	127	737
f3p60_732_13600	1	2	TC	10	32	51	681	732
f3p60_733_13631	1	2	TC	11	23	44	689	733
f2p60_733_13634	1	4	TGCT	5	510	529	204	733
f2p60_726_13645	1	3	TGC	8	649	672	54	726
f3p60_691_13665	1	3	AAG	6	1	18	673	691
f2p60_751_13683	1	3	TGC	8	104	127	624	751
f13p60_733_13688	1	2	AG	14	59	86	647	733
f2p60_731_13692	1	3	CTC	7	35	55	676	731
f2p60_731_13710	1	2	TC	10	65	84	647	731
f2p60_737_13729	1	3	AGC	6	60	77	660	737
f2p60_719_13747	1	2	AG	18	7	42	677	719
f5p60_732_13757	1	4	CTTT	6	488	511	221	732
f2p60_723_13762	1	2	GA	18	7	42	681	723
f8p60_707_13784	1	3	TTA	7	657	677	30	707
f4p60_733_13785	1	4	AATC	6	93	116	617	733
f2p60_708_13853	1	2	TA	9	585	602	106	708
f2p60_708_13873	1	2	CT	9	112	129	579	708
f2p60_713_13884	1	2	AT	30	545	604	109	713
f2p17_710_13901	1	3	AGC	6	428	445	265	710
f2p60_724_13947	1	4	TTGT	6	570	593	131	724
f2p60_706_13955	1	2	GA	10	105	124	582	706
f2p60_737_13977	1	2	AG	11	31	52	685	737
f3p60_723_13989	1	3	ATA	6	33	50	673	723
f2p22_699_14013	1	3	AAT	6	543	560	139	699
f8p60_699_14014	1	2	AG	14	59	86	613	699
f2p60_689_14045	1	4	ATTA	5	636	655	34	689
f7p60_691_14095	1	2	TG	9	483	500	191	691
f5p57_706_14108	1	2	GA	10	62	81	625	706
f5p57_706_14108	2	2	GA	10	432	451	255	706
f4p60_623_14129	1	3	TGG	7	295	315	308	623
f2p60_677_14172	1	3	CAC	6	161	178	499	677
f2p60_677_14172	2	3	CAC	9	449	475	202	677
f3p60_683_14173	1	2	GA	12	15	38	645	683
f6p60_675_14174	1	2	TC	12	24	47	628	675
f205p60_600_14215	1	2	TG	9	483	500	100	600
f2p43_671_14227	1	3	TAT	7	377	397	274	671
f3p60_661_14260	1	3	AAT	6	559	576	85	661
f4p60_674_14277	1	2	AG	14	57	84	590	674
f5p60_663_14299	1	3	TGC	8	561	584	79	663
f12p60_649_14309	1	3	GGC	6	319	336	313	649
f2p60_671_14325	1	3	GAA	6	104	121	550	671
f2p26_665_14357	1	3	CTT	6	33	50	615	665
f108p60_656_14394	1	2	AG	14	59	86	570	656
f2p60_678_14409	1	3	GCA	7	7	27	651	678
f2p60_662_14421	1	3	GAA	7	516	536	126	662
f3p60_685_14425	1	4	TGCT	5	416	435	250	685
f2p60_662_14537	1	3	ATC	6	191	208	454	662
f12p60_636_14569	1	3	AAT	6	548	565	71	636
f5p60_635_14608	1	3	GCA	7	7	27	608	635
f2p60_637_14616	1	3	GCA	6	39	56	581	637
f5p60_638_14628	1	3	AAT	14	544	585	53	638
f3p60_650_14657	1	2	TG	10	485	504	146	650
f2p52_620_14677	1	2	TA	9	466	483	137	620
f2p60_626_14752	1	2	TA	9	73	90	536	626
f4p60_621_14765	1	2	TG	9	483	500	121	621
f4p60_620_14798	1	3	CTC	7	25	45	575	620
f4p60_629_14802	1	2	GA	10	53	72	557	629
f3p60_614_14806	1	2	GA	12	15	38	576	614
f4p60_613_14842	1	3	GCA	8	8	31	582	613
f4p60_611_14868	1	3	AGC	6	64	81	530	611
f6p60_648_14909	1	2	TC	10	32	51	597	648
f2p60_608_14938	1	2	TC	15	222	251	357	608
f6p60_604_14946	1	3	GGT	7	72	92	512	604
f18p60_602_14959	1	2	GA	9	62	79	523	602
f18p60_602_14959	2	2	GA	10	430	449	153	602
f4p60_633_15035	1	2	GA	10	59	78	555	633
f2p60_596_15037	1	3	AAG	8	531	554	42	596
f2p54_592_15038	1	3	GGT	7	34	54	538	592
f18p60_592_15042	1	2	GA	12	15	38	554	592
f2p60_591_15048	1	3	AGC	6	62	79	512	591
f24p60_655_15098	1	2	TG	10	557	576	79	655
f3p60_579_15142	1	3	CTC	6	231	248	331	579
f2p19_578_15197	1	2	GA	16	424	455	123	578
f8p60_604_15211	1	2	GA	17	427	460	144	604
f2p60_572_15254	1	3	TGC	6	366	383	189	572
f5p60_559_15259	1	2	AT	17	391	424	135	559
f2p44_567_15269	1	3	TCC	9	208	234	333	567
f2p60_565_15279	1	2	TG	9	487	504	61	565
f2p60_560_15303	1	3	TGC	7	321	341	219	560
f2p60_560_15398	1	2	TC	13	425	450	110	560
f3p60_566_15399	1	2	AG	11	55	76	490	566
f2p45_538_15406	1	3	TAA	8	466	489	49	538
f2p60_567_15463	1	2	AG	13	58	83	484	567
f3p47_570_15483	1	3	CTC	6	305	322	248	570
f2p60_547_15486	1	2	AT	10	329	348	199	547
f2p60_540_15500	1	2	AT	11	450	471	69	540
f2p60_529_15549	1	3	CAC	8	148	171	358	529
f2p60_532_15569	1	2	GA	10	47	66	466	532
f2p55_536_15574	1	3	TTA	9	476	502	34	536
f2p60_537_15582	1	4	TTTG	5	317	336	201	537
f2p60_530_15597	1	4	TGTT	5	354	373	157	530
f6p60_528_15612	1	3	CTC	6	231	248	280	528
f2p48_547_15625	1	2	TA	13	472	497	50	547
f3p60_535_15637	1	3	TTC	6	57	74	461	535
f5p60_521_15664	1	3	CAT	6	396	413	108	521
f6p60_527_15672	1	3	CCA	7	239	259	268	527
f40p60_525_15675	1	3	CTT	9	179	205	320	525
f3p60_525_15685	1	3	CTT	10	71	100	425	525
f2p60_522_15696	1	3	TCT	7	311	331	191	522
f2p60_509_15741	1	3	GGC	6	71	88	421	509
f2p16_511_15749	1	2	TC	13	254	279	232	511
f3p60_519_15789	1	2	AG	14	25	52	467	519
f2p60_510_15792	1	3	CTC	6	270	287	223	510
f2p60_515_15837	1	2	CT	14	392	419	96	515
f2p29_495_15854	1	3	GAC	6	115	132	363	495
f2p60_496_15857	1	3	TGG	7	1	21	475	496
f6p60_493_15904	1	3	CTC	6	235	252	241	493
f8p60_515_15938	1	3	TGC	8	321	344	171	515
f9p60_480_15996	1	2	TG	9	366	383	97	480
f4p60_474_16041	1	2	TA	9	340	357	117	474
f2p46_477_16075	1	4	TGCT	5	209	228	249	477
f7p60_475_16138	1	3	TGC	8	315	338	137	475
f2p60_447_16196	1	3	TAG	6	186	203	244	447
f2p60_464_16213	1	3	TCC	9	213	239	225	464
f3p60_447_16229	1	3	GGC	6	77	94	353	447
f5p60_453_16238	1	2	TA	9	195	212	241	453
f2p60_432_16310	1	3	TGC	7	246	266	166	432
f2p60_435_16312	1	3	AAT	7	353	373	62	435
f2p10_430_16332	1	3	GGC	6	26	43	387	430
f4p60_439_16353	1	2	TG	10	331	350	89	439
f4p60_441_16402	1	2	TG	9	257	274	167	441
f2p60_400_16471	1	3	TGC	6	308	325	75	400
f2p60_408_16473	1	2	TA	9	195	212	196	408
f22p60_483_16595	1	3	TGC	8	315	338	145	483
f4p60_387_16603	1	2	TG	9	197	214	173	387
f3p60_390_16647	1	3	CTT	9	45	71	319	390
f2p27_357_16707	1	2	TC	15	220	249	108	357
f2p60_356_16727	1	3	ATT	6	174	191	165	356
f2p60_350_16808	1	4	CTGT	7	174	201	149	350
f8p60_355_16828	1	3	GGC	6	26	43	312	355
f2p60_332_16897	1	3	GGC	6	6	23	309	332
f2p60_303_17080	1	3	ATT	6	140	157	146	303
f2p60_300_17118	1	2	TC	13	34	59	241	300
f2p60_295_17134	1	3	TTA	7	15	35	260	295
f4p60_293_17157	1	2	TG	10	197	216	77	293
f2p60_267_17232	1	2	TA	9	36	53	214	267
f2p60_259_17282	1	2	TC	16	114	145	114	259
f4p60_243_17412	1	2	TA	9	98	115	128	243
f2p60_240_17443	1	4	AATT	5	188	207	33	240
f2p60_219_17516	1	3	TGA	6	84	101	118	219
f2p34_211_17527	1	3	ATT	9	11	37	174	211
f6p57_200_17612	1	2	TG	10	91	110	90	200
f3p60_189_17620	1	2	CT	12	69	92	97	189
f2p38_195_17623	1	4	TCTG	5	1	20	175	195
f5p60_182_17653	1	2	TC	12	29	52	130	182
f2p60_178_17664	1	2	AT	13	70	95	83	178
f2p40_169_17690	1	2	TG	9	68	85	84	169
f3p60_116_17732	1	2	CT	11	59	80	36	116
f3p60_7253_17735	1	3	CAG	9	466	492	6761	7253
f2p53_6784_17742	1	2	TC	9	61	78	6706	6784
f3p50_6426_17748	1	3	CTT	9	173	199	6227	6426
f3p60_5790_17761	1	2	AG	12	7	30	5760	5790
f2p58_5756_17764	1	3	GCA	6	2735	2752	3004	5756
f2p58_5756_17764	2	3	CAG	6	4034	4051	1705	5756
f2p58_5756_17764	3	3	CAG	6	4847	4864	892	5756
f2p18_5575_17774	1	3	CAG	7	4438	4458	1117	5575
f2p16_5327_17796	1	3	CAG	8	3722	3745	1582	5327
f2p16_5327_17796	2	3	CAG	8	3749	3772	1555	5327
f2p16_5327_17796	3	3	CAG	6	3800	3817	1510	5327
f2p16_5327_17796	4	3	CAG	6	3842	3859	1468	5327
f2p16_5327_17796	5	3	CAG	14	4364	4405	922	5327
f2p16_5327_17796	6	3	CAG	6	4409	4426	901	5327
f2p16_5327_17796	7	3	CAG	7	4520	4540	787	5327
f2p16_5327_17796	8	3	CAG	9	4553	4579	748	5327
f3p60_5204_17808	1	2	GA	9	50	67	5137	5204
f2p17_5053_17817	1	2	CT	17	161	194	4859	5053
f3p60_4958_17829	1	2	TC	12	28	51	4907	4958
f3p50_4939_17832	1	2	GA	9	6	23	4916	4939
f2p26_4837_17845	1	3	CTG	11	397	429	4408	4837
f2p18_4725_17862	1	4	GAAG	5	185	204	4521	4725
f4p60_4700_17865	1	4	GAAG	5	185	204	4496	4700
f2p23_4677_17868	1	2	TG	13	447	472	4205	4677
f2p60_4489_17893	1	3	CTC	7	51	71	4418	4489
f6p60_4441_17915	1	2	AG	15	1	30	4411	4441
f2p52_4454_17916	1	3	CTC	7	54	74	4380	4454
f2p34_4410_17930	1	3	CAG	6	979	996	3414	4410
f2p34_4410_17930	2	3	GCA	10	2595	2624	1786	4410
f2p60_4400_17934	1	3	CAG	9	997	1023	3377	4400
f3p60_4398_17936	1	2	CT	9	37	54	4344	4398
f3p22_4340_17955	1	2	AT	16	4165	4196	144	4340
f2p46_4233_17987	1	3	CCA	8	143	166	4067	4233
f2p13_4233_17992	1	3	TGA	8	1493	1516	2717	4233
f2p33_4218_17993	1	4	TTTC	5	3980	3999	219	4218
f3p30_4166_18006	1	3	CTT	11	751	783	3383	4166
f2p60_4140_18026	1	2	AG	10	36	55	4085	4140
f3p60_4129_18030	1	2	AT	11	243	264	3865	4129
f3p60_4121_18035	1	3	GAC	7	719	739	3382	4121
f2p60_4094_18046	1	3	CCT	7	103	123	3971	4094
f2p60_4086_18061	1	3	CAG	10	2170	2199	1887	4086
f2p24_4090_18062	1	3	TCT	6	31	48	4042	4090
f3p60_4085_18070	1	2	AG	9	27	44	4041	4085
f4p60_4058_18072	1	3	CAC	7	218	238	3820	4058
f2p19_4039_18089	1	2	TA	10	3807	3826	213	4039
f3p60_4039_18090	1	3	GAA	8	821	844	3195	4039
f3p60_4040_18091	1	3	TCT	6	31	48	3992	4040
f2p60_4032_18094	1	2	TC	13	727	752	3280	4032
f4p60_4026_18101	1	4	TCCC	5	68	87	3939	4026
f10p60_4029_18103	1	2	AG	9	249	266	3763	4029
f10p60_4029_18103	2	3	AGA	7	175	195	3834	4029
f10p60_4029_18103	3	4	CTTT	5	268	287	3742	4029
f2p60_3971_18143	1	2	TA	10	3862	3881	90	3971
f16p60_3964_18148	1	2	AG	11	16	37	3927	3964
f2p60_3968_18150	1	2	TG	11	3663	3684	284	3968
f4p60_3958_18154	1	3	CCA	9	143	169	3789	3958
f6p60_3949_18156	1	3	GCT	6	124	141	3808	3949
f2p60_3953_18159	1	3	TGC	6	3478	3495	458	3953
f2p60_3953_18159	2	3	TGA	7	3496	3516	437	3953
f2p60_3944_18164	1	3	CCA	8	143	166	3778	3944
f3p40_3938_18170	1	3	CCA	9	143	169	3769	3938
f2p46_3877_18181	1	3	GAA	8	699	722	3155	3877
f6p60_3917_18186	1	2	TG	11	3663	3684	233	3917
f3p60_3904_18192	1	3	GAA	8	698	721	3183	3904
f3p60_3919_18193	1	3	CCA	8	143	166	3753	3919
f2p44_3901_18196	1	3	CCA	8	72	95	3806	3901
f4p60_3890_18208	1	2	AG	11	11	32	3858	3890
f2p38_3872_18215	1	2	TG	13	3663	3688	184	3872
f2p15_3861_18228	1	2	AG	16	43	74	3787	3861
f2p15_3861_18228	2	3	TCT	6	281	298	3563	3861
f2p60_3858_18235	1	2	TA	14	3447	3474	384	3858
f2p60_3858_18235	2	2	AG	14	3474	3501	357	3858
f2p60_3858_18235	3	3	GAA	7	148	168	3690	3858
f9p60_3899_18237	1	4	CTCC	5	99	118	3781	3899
f2p60_3851_18239	1	3	CAG	9	449	475	3376	3851
f2p53_3837_18241	1	3	CCT	8	109	132	3705	3837
f2p45_3847_18242	1	2	AG	9	179	196	3651	3847
f2p45_3847_18242	2	3	AGA	8	106	129	3718	3847
f2p45_3847_18242	3	4	CTTT	5	198	217	3630	3847
f3p60_3839_18247	1	3	CCA	9	143	169	3670	3839
f2p60_3835_18248	1	3	CCT	6	852	869	2966	3835
f2p60_3835_18248	2	3	AGA	7	964	984	2851	3835
f4p60_3819_18270	1	3	AAT	6	3752	3769	50	3819
f4p60_3800_18271	1	2	TA	9	1984	2001	1799	3800
f4p60_3800_18271	2	4	TTAA	5	519	538	3262	3800
f2p54_3781_18298	1	3	GAA	6	591	608	3173	3781
f2p54_3781_18298	2	3	TTA	6	3715	3732	49	3781
f3p60_3768_18306	1	3	CAG	10	1535	1564	2204	3768
f2p60_3770_18307	1	3	TCC	6	3545	3562	208	3770
f3p21_3732_18329	1	3	GAA	6	598	615	3117	3732
f5p60_3730_18341	1	2	GA	10	779	798	2932	3730
f2p60_3731_18342	1	3	TTG	10	141	170	3561	3731
f2p60_3736_18343	1	2	CT	12	3191	3214	522	3736
f2p17_3726_18355	1	3	CAC	7	44	64	3662	3726
f3p60_3714_18362	1	2	CT	14	33	60	3654	3714
f2p60_3694_18373	1	3	CAC	6	44	61	3633	3694
f4p60_3676_18390	1	3	AAG	8	135	158	3518	3676
f4p60_3670_18392	1	3	CAG	12	1374	1409	2261	3670
f4p60_3670_18392	2	3	CAT	7	1410	1430	2240	3670
f4p60_3670_18392	3	3	CAG	9	1431	1457	2213	3670
f2p60_3665_18395	1	3	CAG	13	1430	1468	2197	3665
f2p60_3665_18395	2	3	CAT	7	1469	1489	2176	3665
f2p60_3665_18395	3	3	CAG	9	1490	1516	2149	3665
f2p60_3666_18403	1	2	AG	10	21	40	3626	3666
f5p60_3662_18408	1	2	AG	10	57	76	3586	3662
f2p16_3657_18411	1	2	AG	10	70	89	3568	3657
f3p60_3645_18419	1	3	AAG	8	134	157	3488	3645
f4p60_3650_18420	1	2	CT	15	35	64	3586	3650
f2p53_3657_18425	1	3	AAT	8	2121	2144	1513	3657
f2p60_3644_18430	1	3	GCG	8	204	227	3417	3644
f2p60_3615_18437	1	3	CAG	12	1369	1404	2211	3615
f2p60_3615_18437	2	3	CAT	7	1405	1425	2190	3615
f2p60_3615_18437	3	3	CAG	9	1426	1452	2163	3615
f2p45_3621_18449	1	3	TCC	6	3394	3411	210	3621
f2p36_3618_18450	1	2	AG	9	86	103	3515	3618
f2p48_3598_18455	1	3	AGC	6	210	227	3371	3598
f3p60_3606_18462	1	3	CCT	6	649	666	2940	3606
f3p60_3606_18462	2	3	AGA	7	761	781	2825	3606
f2p38_3602_18465	1	3	AAG	6	408	425	3177	3602
f2p24_3599_18469	1	2	AT	24	3472	3519	80	3599
f2p34_3600_18471	1	3	AAG	8	106	129	3471	3600
f2p60_3596_18488	1	3	CAG	6	1336	1353	2243	3596
f2p60_3596_18488	2	3	CAG	8	1363	1386	2210	3596
f4p60_3564_18521	1	2	AG	10	21	40	3524	3564
f3p60_3556_18523	1	2	CT	9	76	93	3463	3556
f5p60_3550_18529	1	2	GA	17	76	109	3441	3550
f2p60_3546_18531	1	2	AG	9	44	61	3485	3546
f11p60_3541_18534	1	3	AAC	7	204	224	3317	3541
f2p31_3549_18540	1	3	AGC	6	101	118	3431	3549
f2p60_3526_18553	1	2	GA	17	48	81	3445	3526
f2p52_3528_18556	1	3	AGC	6	104	121	3407	3528
f2p34_3532_18559	1	3	GAC	7	3017	3037	495	3532
f3p42_3537_18562	1	3	AAC	8	162	185	3352	3537
f2p12_3536_18567	1	2	AT	15	3365	3394	142	3536
f17p60_3457_18569	1	3	AAC	6	141	158	3299	3457
f3p56_3519_18571	1	3	CCT	6	842	859	2660	3519
f2p9_3515_18575	1	2	TC	10	26	45	3470	3515
f2p27_3516_18576	1	4	AATT	7	123	150	3366	3516
f2p7_3514_18582	1	2	TA	9	1983	2000	1514	3514
f2p7_3514_18582	2	4	TTAA	5	519	538	2976	3514
f2p60_3499_18594	1	3	AAT	7	3424	3444	55	3499
f9p60_3507_18596	1	2	CT	9	33	50	3457	3507
f23p60_3438_18601	1	2	CT	9	77	94	3344	3438
f10p60_3488_18614	1	2	CT	9	31	48	3440	3488
f2p60_3452_18630	1	2	TA	28	3228	3283	169	3452
f2p49_3449_18634	1	2	GA	15	47	76	3373	3449
f4p60_3445_18638	1	2	GA	15	1	30	3415	3445
f2p60_3446_18647	1	2	AG	17	376	409	3037	3446
f6p60_3442_18649	1	2	GA	17	76	109	3333	3442
f3p60_3436_18659	1	2	GA	17	46	79	3357	3436
f3p60_3422_18662	1	3	CAC	7	59	79	3343	3422
f2p39_3433_18665	1	3	AGC	9	782	808	2625	3433
f2p33_3395_18691	1	3	CAG	7	2966	2986	409	3395
f3p60_3394_18697	1	2	GA	10	44	63	3331	3394
f8p60_3398_18699	1	2	TC	10	32	51	3347	3398
f4p60_3396_18701	1	3	AGC	6	337	354	3042	3396
f8p60_3401_18715	1	3	AGC	9	327	353	3048	3401
f2p60_3392_18723	1	2	TC	9	3065	3082	310	3392
f2p60_3392_18723	2	3	GAT	7	371	391	3001	3392
f3p43_3362_18726	1	2	TC	15	42	71	3291	3362
f2p16_3366_18737	1	2	GT	18	3142	3177	189	3366
f20p60_3355_18750	1	2	AG	12	7	30	3325	3355
f3p54_3461_18755	1	2	TA	12	173	196	3265	3461
f2p48_3352_18763	1	3	CAG	10	468	497	2855	3352
f2p48_3352_18763	2	3	CAA	13	498	536	2816	3352
f2p48_3352_18763	3	3	CAG	11	579	611	2741	3352
f2p48_3352_18763	4	3	CAA	6	633	650	2702	3352
f2p48_3352_18763	5	3	CAG	17	657	707	2645	3352
f2p48_3352_18763	6	3	CAG	8	1584	1607	1745	3352
f2p48_3352_18763	7	3	GCA	8	1610	1633	1719	3352
f2p48_3352_18763	8	3	CAG	7	1689	1709	1643	3352
f2p51_3354_18764	1	4	TGAT	5	2822	2841	513	3354
f3p60_3354_18767	1	3	AGC	9	357	383	2971	3354
f2p25_3350_18776	1	2	TC	10	531	550	2800	3350
f2p60_3340_18778	1	2	CT	19	30	67	3273	3340
f4p60_3300_18824	1	2	CT	16	30	61	3239	3300
f2p60_3297_18830	1	3	TCG	6	8	25	3272	3297
f2p60_3290_18844	1	3	AGC	6	403	420	2870	3290
f2p36_3293_18847	1	4	TTTC	5	284	303	2990	3293
f2p45_3280_18851	1	2	TC	14	42	69	3211	3280
f3p60_3284_18859	1	2	CT	17	35	68	3216	3284
f2p20_3231_18862	1	3	CAG	6	2517	2534	697	3231
f2p43_3268_18870	1	3	GAA	6	384	401	2867	3268
f4p60_3268_18876	1	2	GA	16	1	32	3236	3268
f2p60_3257_18878	1	2	TC	18	36	71	3186	3257
f3p60_3258_18889	1	2	CT	9	76	93	3165	3258
f2p22_3257_18892	1	2	CT	19	35	72	3185	3257
f7p60_3258_18895	1	4	TTCC	8	306	337	2921	3258
f2p60_3248_18907	1	2	GA	18	8	43	3205	3248
f2p36_3241_18917	1	4	TTCC	8	226	257	2984	3241
f4p60_3232_18924	1	2	GA	15	1	30	3202	3232
f2p60_3234_18928	1	3	CCT	6	280	297	2937	3234
f2p60_3234_18928	2	3	AGA	7	392	412	2822	3234
f3p16_3207_18938	1	4	CCTC	8	147	178	3029	3207
f3p44_3226_18940	1	2	CA	15	3007	3036	190	3226
f2p60_3225_18942	1	2	GA	10	45	64	3161	3225
f2p46_3213_18958	1	4	AATC	8	88	119	3094	3213
f9p60_3202_18974	1	2	GA	15	30	59	3143	3202
f2p29_3193_18979	1	2	CT	13	37	62	3131	3193
f2p38_3192_18982	1	3	CAC	6	201	218	2974	3192
f2p38_3192_18982	2	3	CTC	7	227	247	2945	3192
f2p31_3180_19000	1	3	GAT	6	1405	1422	1758	3180
f2p60_3154_19010	1	2	TA	9	293	310	2844	3154
f2p60_3162_19015	1	4	GAGG	5	200	219	2943	3162
f2p20_3146_19020	1	2	GA	10	193	212	2934	3146
f2p20_3159_19047	1	3	TGC	6	1107	1124	2035	3159
f2p60_3139_19054	1	2	GA	14	30	57	3082	3139
f3p60_3133_19060	1	4	TTCC	6	191	214	2919	3133
f3p60_3133_19060	2	4	CCCT	5	268	287	2846	3133
f3p25_3141_19069	1	3	GCA	10	482	511	2630	3141
f3p25_3141_19069	2	3	CAG	14	525	566	2575	3141
f3p25_3141_19069	3	3	CAG	9	570	596	2545	3141
f3p25_3141_19069	4	3	CAG	13	1386	1424	1717	3141
f3p60_3131_19071	1	3	TGC	8	2090	2113	1018	3131
f2p60_3122_19083	1	2	CT	9	131	148	2974	3122
f2p60_3116_19090	1	3	GCA	10	504	533	2583	3116
f2p60_3116_19090	2	3	CAG	11	558	590	2526	3116
f2p60_3116_19090	3	3	CAG	9	597	623	2493	3116
f2p60_3116_19090	4	3	CAG	11	1413	1445	1671	3116
f3p60_3104_19106	1	2	TA	11	296	317	2787	3104
f2p32_3119_19113	1	2	GA	13	46	71	3048	3119
f5p60_3099_19114	1	3	CAG	6	2516	2533	566	3099
f2p19_3118_19117	1	2	TA	18	251	286	2832	3118
f4p60_3094_19119	1	2	TA	11	254	275	2819	3094
f3p37_3098_19121	1	3	CAC	6	200	217	2881	3098
f3p37_3098_19121	2	3	CTC	7	226	246	2852	3098
f2p38_3094_19124	1	2	TC	13	38	63	3031	3094
f19p60_3178_19127	1	3	CTT	7	276	296	2882	3178
f2p60_3077_19146	1	3	CAG	7	1004	1024	2053	3077
f2p60_3084_19149	1	2	AG	12	23	46	3038	3084
f2p60_3071_19161	1	2	AG	11	113	134	2937	3071
f3p60_3080_19162	1	3	GCA	11	468	500	2580	3080
f3p60_3080_19162	2	3	CAG	12	520	555	2525	3080
f3p60_3080_19162	3	3	CAG	10	559	588	2492	3080
f3p60_3080_19162	4	3	CAG	12	1378	1413	1667	3080
f4p60_3061_19173	1	2	CT	9	54	71	2990	3061
f3p60_3058_19179	1	3	CTC	6	63	80	2978	3058
f2p60_3057_19182	1	3	CAC	6	191	208	2849	3057
f2p60_3057_19182	2	3	CTC	7	217	237	2820	3057
f5p60_3060_19188	1	2	TC	16	246	277	2783	3060
f8p60_3034_19189	1	2	CT	12	70	93	2941	3034
f2p60_3053_19192	1	2	TA	17	254	287	2766	3053
f2p60_3056_19194	1	3	AGA	7	32	52	3004	3056
f2p59_3045_19204	1	3	GCA	7	2172	2192	853	3045
f3p60_3036_19213	1	2	TA	18	295	330	2706	3036
f3p52_3036_19218	1	2	TC	10	229	248	2788	3036
f4p60_3034_19227	1	4	TGAT	5	2756	2775	259	3034
f2p16_3027_19240	1	4	TTTC	5	283	302	2725	3027
f2p60_3018_19245	1	3	AGA	6	37	54	2964	3018
f10p60_3011_19254	1	4	GAGG	6	56	79	2932	3011
f2p60_3014_19262	1	3	ATC	7	92	112	2902	3014
f2p60_3011_19266	1	3	GGC	6	242	259	2752	3011
f2p60_3011_19271	1	3	CCA	6	1567	1584	1427	3011
f2p60_3003_19274	1	2	CT	10	84	103	2900	3003
f2p45_3002_19277	1	3	AGG	6	471	488	2514	3002
f2p31_2991_19298	1	2	AT	16	2799	2830	161	2991
f2p60_2983_19313	1	3	CCA	8	434	457	2526	2983
f3p60_2978_19316	1	2	TC	13	42	67	2911	2978
f4p60_3061_19323	1	2	TC	13	53	78	2983	3061
f2p60_2970_19327	1	3	CTT	7	75	95	2875	2970
f2p60_2983_19331	1	2	GA	10	31	50	2933	2983
f2p60_2951_19351	1	3	CAG	6	2246	2263	688	2951
f2p60_2951_19351	2	3	GCA	6	2308	2325	626	2951
f2p60_2951_19351	3	3	GCA	12	2374	2409	542	2951
f2p60_2951_19351	4	3	CAG	7	2435	2455	496	2951
f2p22_2960_19355	1	3	CAG	9	212	238	2722	2960
f2p43_2949_19365	1	2	CT	10	93	112	2837	2949
f2p43_2949_19365	2	3	CCT	6	242	259	2690	2949
f2p59_2952_19375	1	3	CCA	8	354	377	2575	2952
f2p60_2932_19387	1	2	AG	23	25	70	2862	2932
f2p60_2933_19391	1	3	CCG	6	1096	1113	1820	2933
f2p29_2929_19398	1	2	AG	9	1	18	2911	2929
f2p47_2929_19400	1	3	AGA	6	29	46	2883	2929
f3p60_2936_19402	1	2	AG	14	8	35	2901	2936
f2p23_2926_19404	1	3	ATC	7	91	111	2815	2926
f2p60_2928_19409	1	2	AG	11	120	141	2787	2928
f2p60_2928_19409	2	3	GAA	6	633	650	2278	2928
f2p60_2928_19409	3	4	TAGA	5	103	122	2806	2928
f3p60_2928_19412	1	3	AGG	6	409	426	2502	2928
f2p60_2912_19433	1	3	CTT	6	119	136	2776	2912
f2p60_2932_19435	1	2	TC	9	54	71	2861	2932
f2p60_2904_19449	1	2	CT	9	49	66	2838	2904
f2p31_2897_19457	1	2	AG	12	2616	2639	258	2897
f2p60_2897_19458	1	3	CAG	6	1215	1232	1665	2897
f2p60_2897_19458	2	3	CAG	7	1236	1256	1641	2897
f2p60_2897_19458	3	3	CAG	6	1263	1280	1617	2897
f2p60_2897_19458	4	3	CAG	6	1287	1304	1593	2897
f2p60_2897_19458	5	3	CAG	6	1329	1346	1551	2897
f2p60_2897_19458	6	3	CAG	6	1851	1868	1029	2897
f2p60_2897_19458	7	3	CAG	10	1920	1949	948	2897
f2p60_2897_19458	8	3	CAG	8	1962	1985	912	2897
f2p60_2897_19458	9	3	CAG	6	1995	2012	885	2897
f2p60_2897_19458	10	3	CAG	9	2025	2051	846	2897
f3p60_2894_19464	1	3	AGG	6	410	427	2467	2894
f2p60_2891_19472	1	3	GAT	7	203	223	2668	2891
f2p60_2886_19475	1	3	CAG	7	2131	2151	735	2886
f2p60_2885_19479	1	3	AAG	6	118	135	2750	2885
f5p60_2860_19482	1	3	GAT	8	2049	2072	788	2860
f2p60_2885_19491	1	3	AGA	6	29	46	2839	2885
f2p60_2883_19494	1	3	AAG	6	232	249	2634	2883
f18p60_2876_19503	1	3	CTT	6	127	144	2732	2876
f5p60_2852_19507	1	2	AG	11	25	46	2806	2852
f2p43_2876_19508	1	2	CT	10	22	41	2835	2876
f3p60_2852_19550	1	3	CTT	6	127	144	2708	2852
f2p60_2851_19554	1	3	TGG	11	600	632	2219	2851
f2p24_2844_19559	1	2	GA	11	217	238	2606	2844
f4p60_2841_19580	1	2	AC	14	1	28	2813	2841
f2p60_2835_19585	1	2	AG	12	2504	2527	308	2835
f4p60_2828_19586	1	3	CTC	8	2044	2067	761	2828
f2p47_2829_19596	1	3	CAG	6	6	23	2806	2829
f2p60_2831_19599	1	3	GCA	7	1344	1364	1467	2831
f2p27_2818_19621	1	3	CAG	6	2280	2297	521	2818
f2p27_2818_19621	2	3	GCA	6	2342	2359	459	2818
f2p27_2818_19621	3	3	GCA	8	2396	2419	399	2818
f2p27_2818_19621	4	3	GCA	11	2423	2455	363	2818
f2p27_2818_19621	5	3	CAG	7	2481	2501	317	2818
f2p52_2813_19625	1	3	GCA	7	1266	1286	1527	2813
f2p60_2814_19628	1	3	CTT	6	124	141	2673	2814
f16p60_2843_19631	1	2	AG	11	7	28	2815	2843
f3p60_2810_19634	1	2	GA	11	11	32	2778	2810
f3p60_2810_19634	2	3	CTT	8	2366	2389	421	2810
f2p60_2804_19639	1	3	GCA	11	218	250	2554	2804
f2p60_2801_19647	1	3	GGT	6	548	565	2236	2801
f2p60_2787_19670	1	3	TTA	6	2721	2738	49	2787
f4p60_2797_19679	1	3	GAT	7	99	119	2678	2797
f2p60_2784_19685	1	3	TTA	6	157	174	2610	2784
f3p60_2775_19701	1	4	TTGA	5	396	415	2360	2775
f2p60_2778_19702	1	3	GAT	7	44	64	2714	2778
f2p37_2780_19709	1	2	AG	11	7	28	2752	2780
f2p34_2767_19713	1	3	AGC	6	458	475	2292	2767
f6p60_2852_19716	1	2	GA	10	1	20	2832	2852
f2p60_2752_19743	1	3	GCA	7	1265	1285	1467	2752
f2p60_2755_19752	1	3	GCA	6	1746	1763	992	2755
f2p12_2734_19755	1	2	AG	11	54	75	2659	2734
f2p60_2731_19772	1	3	CGA	6	87	104	2627	2731
f2p60_2731_19772	2	3	CAT	6	188	205	2526	2731
f2p60_2724_19798	1	2	TA	9	2513	2530	194	2724
f2p56_2725_19800	1	3	TTA	6	118	135	2590	2725
f2p60_2717_19805	1	3	ACA	6	549	566	2151	2717
f3p60_2709_19823	1	2	AG	10	163	182	2527	2709
f2p54_2718_19826	1	3	AAG	8	1	24	2694	2718
f4p60_2719_19837	1	3	CTT	9	195	221	2498	2719
f2p60_2701_19853	1	3	AGC	6	764	781	1920	2701
f2p60_2705_19858	1	3	TGG	11	600	632	2073	2705
f6p60_2704_19864	1	2	GA	23	7	52	2652	2704
f6p60_2704_19864	2	3	CTT	13	245	283	2421	2704
f3p60_2706_19865	1	2	CT	10	38	57	2649	2706
f2p49_2697_19880	1	3	ATA	6	224	241	2456	2697
f3p60_2657_19883	1	2	AG	14	21	48	2609	2657
f3p60_2657_19883	2	3	CCA	6	1764	1781	876	2657
f4p60_2695_19891	1	2	AG	19	23	60	2635	2695
f2p36_2689_19901	1	3	AAG	10	9	38	2651	2689
f2p60_2693_19910	1	3	CGA	6	85	102	2591	2693
f2p60_2693_19910	2	3	CAT	6	186	203	2490	2693
f2p60_2687_19924	1	2	GA	24	7	54	2633	2687
f2p60_2687_19924	2	3	CTT	14	247	288	2399	2687
f3p55_2673_19944	1	3	CAG	6	2219	2236	437	2673
f2p60_2671_19948	1	2	GA	23	9	54	2617	2671
f2p60_2671_19948	2	3	CTT	13	247	285	2386	2671
f5p60_2670_19955	1	3	CGA	6	89	106	2564	2670
f5p60_2670_19955	2	3	CAT	6	190	207	2463	2670
f2p60_2667_19958	1	3	GCA	8	564	587	2080	2667
f2p60_2667_19958	2	3	CAG	6	1849	1866	801	2667
f3p60_2669_19966	1	2	GA	15	7	36	2633	2669
f3p60_2669_19966	2	3	CTT	7	229	249	2420	2669
f11p60_2660_19992	1	2	AT	21	2442	2483	177	2660
f4p60_2649_20003	1	2	CT	19	22	59	2590	2649
f2p60_2657_20011	1	2	AG	11	59	80	2577	2657
f4p60_2633_20036	1	3	AAC	9	656	682	1951	2633
f3p60_2634_20043	1	2	CT	11	47	68	2566	2634
f10p60_2642_20047	1	2	CT	10	42	61	2581	2642
f2p60_2625_20063	1	2	GA	9	28	45	2580	2625
f4p60_2616_20067	1	2	AG	9	23	40	2576	2616
f4p60_2616_20067	2	4	TCCT	5	153	172	2444	2616
f3p60_2605_20079	1	3	CAC	6	200	217	2388	2605
f3p60_2605_20079	2	3	CTC	7	226	246	2359	2605
f3p60_2617_20084	1	2	TG	17	24	57	2560	2617
f3p60_2617_20084	2	2	GA	20	61	100	2517	2617
f2p60_2606_20113	1	3	TCT	6	96	113	2493	2606
f3p60_2607_20116	1	2	AG	9	60	77	2530	2607
f3p60_2607_20116	2	4	TCCT	5	190	209	2398	2607
f6p60_2613_20122	1	3	CAC	6	200	217	2396	2613
f6p60_2613_20122	2	3	CTC	7	226	246	2367	2613
f2p14_2612_20123	1	2	TG	10	24	43	2569	2612
f2p14_2612_20123	2	2	GA	15	47	76	2536	2612
f2p29_2582_20131	1	4	ACAT	5	1	20	2562	2582
f2p60_2591_20133	1	4	AGAC	5	69	88	2503	2591
f3p60_2594_20141	1	2	AG	19	29	66	2528	2594
f2p60_2575_20142	1	3	GCA	6	1852	1869	706	2575
f2p60_2591_20143	1	2	TC	9	2334	2351	240	2591
f4p60_2587_20155	1	2	TA	10	960	979	1608	2587
f4p42_2580_20167	1	2	AC	11	1	22	2558	2580
f2p50_2581_20176	1	2	AT	15	2487	2516	65	2581
f2p60_2582_20179	1	3	ATA	8	682	705	1877	2582
f2p33_2575_20185	1	2	TC	11	38	59	2516	2575
f2p33_2575_20185	2	3	ACC	6	640	657	1918	2575
f2p60_2570_20209	1	2	GA	9	1	18	2552	2570
f4p60_2572_20211	1	2	AG	9	214	231	2341	2572
f2p60_2562_20216	1	3	AGA	6	107	124	2438	2562
f2p60_2562_20216	2	3	AGC	7	224	244	2318	2562
f3p36_2571_20231	1	2	TC	11	38	59	2512	2571
f3p36_2571_20231	2	3	ACC	6	639	656	1915	2571
f6p60_2558_20232	1	2	AG	11	7	28	2530	2558
f2p23_2551_20241	1	2	TC	14	2166	2193	358	2551
f2p60_2550_20244	1	2	AG	9	154	171	2379	2550
f2p60_2546_20250	1	2	GA	9	10	27	2519	2546
f2p38_2545_20253	1	2	CT	10	148	167	2378	2545
f4p60_2564_20257	1	2	GA	13	55	80	2484	2564
f2p60_2547_20265	1	3	AGC	6	2140	2157	390	2547
f2p46_2542_20279	1	3	CAT	6	2189	2206	336	2542
f2p60_2534_20284	1	3	ATC	7	91	111	2423	2534
f2p60_2538_20286	1	3	ATC	11	91	123	2415	2538
f2p60_2526_20291	1	2	TC	9	282	299	2227	2526
f9p60_2514_20320	1	3	AAG	6	159	176	2338	2514
f9p60_2514_20320	2	3	TAA	8	2444	2467	47	2514
f4p60_2515_20327	1	3	ACA	7	299	319	2196	2515
f2p57_2515_20333	1	3	AGA	9	38	64	2451	2515
f5p60_2506_20343	1	4	AGAC	5	24	43	2463	2506
f3p60_2504_20349	1	2	CT	11	41	62	2442	2504
f3p60_2504_20349	2	3	AGC	6	152	169	2335	2504
f3p56_2510_20358	1	2	TC	9	17	34	2476	2510
f3p60_2494_20362	1	3	CCA	10	84	113	2381	2494
f3p60_2506_20370	1	3	ATC	7	156	176	2330	2506
f2p34_2509_20371	1	3	CAG	7	228	248	2261	2509
f7p60_2503_20372	1	2	TC	9	292	309	2194	2503
f2p60_2503_20380	1	2	AG	13	32	57	2446	2503
f2p34_2487_20396	1	2	AG	13	56	81	2406	2487
f2p19_2516_20398	1	3	CAG	7	1217	1237	1279	2516
f2p24_2494_20399	1	3	AGA	6	53	70	2424	2494
f2p24_2494_20399	2	3	AGC	7	170	190	2304	2494
f2p60_2489_20413	1	3	ATA	7	690	710	1779	2489
f3p60_2488_20421	1	2	TA	14	116	143	2345	2488
f3p60_2488_20421	2	2	AG	19	143	180	2308	2488
f2p60_2495_20422	1	2	TC	10	125	144	2351	2495
f3p45_2486_20425	1	3	TGA	6	471	488	1998	2486
f3p45_2486_20425	2	3	GAG	8	490	513	1973	2486
f2p60_2484_20430	1	2	TC	10	182	201	2283	2484
f2p60_2478_20443	1	2	TC	10	120	139	2339	2478
f4p60_2471_20446	1	2	GA	13	6	31	2440	2471
f5p60_2471_20450	1	2	GA	9	6	23	2448	2471
f2p60_2478_20453	1	3	GAA	8	864	887	1591	2478
f3p60_2455_20471	1	2	GA	10	31	50	2405	2455
f3p60_2482_20476	1	3	CAG	7	2070	2090	392	2482
f2p39_2454_20478	1	3	GAC	6	776	793	1661	2454
f3p60_2460_20479	1	3	CCT	8	202	225	2235	2460
f3p60_2460_20479	2	4	AGAA	5	7	26	2434	2460
f3p60_2460_20479	3	4	CCCT	5	320	339	2121	2460
f2p60_2468_20491	1	3	TGA	6	419	436	2032	2468
f2p60_2468_20491	2	3	GAG	8	438	461	2007	2468
f2p60_2451_20502	1	2	TC	11	36	57	2394	2451
f8p60_2448_20515	1	3	CTT	10	2215	2244	204	2448
f2p60_2447_20519	1	3	TCG	12	167	202	2245	2447
f2p25_2447_20529	1	2	GA	13	54	79	2368	2447
f5p60_2444_20533	1	3	ATC	11	90	122	2322	2444
f3p60_2446_20537	1	2	TC	13	439	464	1982	2446
f3p60_2450_20545	1	3	TTC	7	2223	2243	207	2450
f2p60_2422_20562	1	3	TCC	6	128	145	2277	2422
f2p60_2423_20569	1	2	GT	13	1	26	2397	2423
f2p60_2423_20569	2	2	GA	14	27	54	2369	2423
f3p60_2426_20574	1	2	TC	10	82	101	2325	2426
f2p60_2419_20576	1	3	TCT	8	2204	2227	192	2419
f2p35_2421_20579	1	2	AG	14	12	39	2382	2421
f2p60_2425_20589	1	2	TA	24	2269	2316	109	2425
f4p60_2415_20599	1	2	GA	21	3	44	2371	2415
f2p60_2419_20604	1	2	AC	12	1	24	2395	2419
f3p60_2410_20620	1	2	GT	14	2	29	2381	2410
f3p60_2410_20620	2	2	GA	15	30	59	2351	2410
f2p60_2406_20633	1	2	TC	10	78	97	2309	2406
f4p60_2394_20659	1	3	TTG	9	536	562	1832	2394
f4p60_2394_20659	2	3	TTA	7	579	599	1795	2394
f3p60_2377_20682	1	2	AC	10	2047	2066	311	2377
f2p60_2385_20691	1	2	CT	9	453	470	1915	2385
f11p60_2385_20697	1	3	GCT	6	398	415	1970	2385
f2p60_2212_20704	1	3	CCA	7	164	184	2028	2212
f3p60_2379_20716	1	3	CTC	8	130	153	2226	2379
f4p60_2362_20719	1	3	CAT	6	468	485	1877	2362
f2p43_2370_20736	1	3	CCT	6	265	282	2088	2370
f2p43_2370_20736	2	3	CTG	8	281	304	2066	2370
f2p56_2365_20738	1	2	TA	14	116	143	2222	2365
f2p56_2365_20738	2	2	AG	19	143	180	2185	2365
f2p40_2360_20758	1	2	TA	18	2281	2316	44	2360
f2p40_2360_20758	2	3	AGA	6	80	97	2263	2360
f2p57_2366_20778	1	2	GA	17	10	43	2323	2366
f2p25_2350_20780	1	2	GT	14	1	28	2322	2350
f2p25_2350_20780	2	2	GA	16	29	60	2290	2350
f2p60_2337_20793	1	3	TCC	6	130	147	2190	2337
f2p27_2344_20795	1	2	TC	9	98	115	2229	2344
f4p60_2350_20808	1	3	GCT	6	379	396	1954	2350
f2p60_2326_20821	1	3	GAC	6	57	74	2252	2326
f2p60_2332_20829	1	3	CAG	8	1217	1240	1092	2332
f2p60_2331_20839	1	2	AG	9	2161	2178	153	2331
f2p60_2331_20839	2	3	AGG	15	141	185	2146	2331
f2p60_2324_20855	1	3	CAC	6	426	443	1881	2324
f2p18_2323_20860	1	2	CT	9	401	418	1905	2323
f2p60_2319_20872	1	2	CT	11	48	69	2250	2319
f2p60_2347_20877	1	3	AGC	6	79	96	2251	2347
f2p29_2324_20878	1	2	AG	9	40	57	2267	2324
f2p60_2313_20883	1	2	AG	9	47	64	2249	2313
f2p60_2302_20912	1	3	CAA	6	1885	1902	400	2302
f2p60_2298_20914	1	3	GCA	7	1679	1699	599	2298
f2p60_2298_20914	2	3	GAT	7	1700	1720	578	2298
f2p60_2295_20926	1	3	GCT	6	371	388	1907	2295
f2p60_2282_20939	1	2	AG	9	21	38	2244	2282
f6p60_2284_20961	1	3	AGC	6	84	101	2183	2284
f18p60_2282_20964	1	3	TTG	10	468	497	1785	2282
f18p60_2282_20964	2	3	TTA	7	514	534	1748	2282
f2p60_2275_20983	1	3	ATC	11	89	121	2154	2275
f2p60_2273_20986	1	3	GCA	7	1641	1661	612	2273
f2p60_2273_20986	2	3	GAT	7	1662	1682	591	2273
f3p60_2276_20990	1	2	TC	9	371	388	1888	2276
f3p60_2276_20990	2	3	TGC	9	571	597	1679	2276
f2p60_2276_20993	1	2	AT	17	1951	1984	292	2276
f2p60_2276_20993	2	2	TA	11	1987	2008	268	2276
f4p60_2268_20995	1	3	AAT	6	2211	2228	40	2268
f2p60_2276_20997	1	3	TGA	6	475	492	1784	2276
f2p60_2276_20997	2	3	GAT	7	494	514	1762	2276
f2p60_2276_20997	3	3	TCT	6	2124	2141	135	2276
f3p60_2266_21004	1	3	AGC	6	88	105	2161	2266
f2p60_2267_21010	1	2	AG	10	42	61	2206	2267
f3p60_2263_21019	1	2	CT	9	55	72	2191	2263
f2p60_2260_21024	1	3	TTG	10	467	496	1764	2260
f2p60_2260_21024	2	3	TTA	7	513	533	1727	2260
f2p60_2256_21036	1	3	CTC	6	248	265	1991	2256
f3p60_2253_21049	1	3	GAT	7	1733	1753	500	2253
f6p60_2259_21050	1	3	ATT	9	13	39	2220	2259
f2p15_2253_21059	1	2	CT	9	21	38	2215	2253
f2p15_2253_21059	2	3	AGC	6	136	153	2100	2253
f2p60_2249_21067	1	2	GA	10	71	90	2159	2249
f2p55_2275_21074	1	3	GCA	7	1662	1682	593	2275
f2p55_2275_21074	2	3	GAT	7	1683	1703	572	2275
f2p31_2246_21079	1	2	TC	15	191	220	2026	2246
f2p55_2231_21113	1	3	TAG	6	579	596	1635	2231
f5p60_2237_21117	1	2	AG	9	52	69	2168	2237
f3p60_2231_21125	1	2	TC	11	87	108	2123	2231
f3p60_2231_21125	2	3	CTC	6	54	71	2160	2231
f4p60_2230_21131	1	2	TC	18	168	203	2027	2230
f3p60_2215_21186	1	2	TC	10	170	189	2026	2215
f2p60_2219_21192	1	3	GCA	7	1641	1661	558	2219
f2p60_2219_21192	2	3	GAT	7	1662	1682	537	2219
f2p60_2218_21199	1	2	AG	15	30	59	2159	2218
f2p60_2218_21199	2	3	CCA	6	1774	1791	427	2218
f2p60_2208_21216	1	3	AAG	7	41	61	2147	2208
f3p60_2215_21228	1	3	GCA	7	1665	1685	530	2215
f3p60_2215_21228	2	3	GAT	7	1686	1706	509	2215
f2p60_2202_21231	1	4	TGTC	5	2038	2057	145	2202
f2p60_2197_21254	1	3	CCT	13	147	185	2012	2197
f2p60_2213_21260	1	3	CCA	6	165	182	2031	2213
f2p60_2194_21264	1	2	AT	12	2023	2046	148	2194
f2p60_2194_21264	2	3	AGG	8	141	164	2030	2194
f4p60_2203_21265	1	3	AGC	9	142	168	2035	2203
f3p60_2191_21272	1	2	AT	25	2102	2151	40	2191
f2p36_2171_21328	1	3	TGG	7	719	739	1432	2171
f2p38_2171_21339	1	3	AGC	6	180	197	1974	2171
f2p60_2171_21340	1	3	CTT	12	611	646	1525	2171
[truncated: 1,123 more rows]
