# Supplementary material for: Characterization of the Gene Expression Profile Response to Drought Stress in Populus ussuriensis Using PacBio SMRT and Illumina Sequencing
Source: Int J Mol Sci. 2022 Mar 30;23(7):3840. doi: 10.3390/ijms23073840 (PMC8998571; doi:10.3390/ijms23073840)
Supplement: Supplementary file 1 [file ijms-23-03840-s001.zip › Table S4.xls]

## Sheet: Sheet1
Table S4 Identification of AS events in Populus ussuriensis
ID	Transcripts	Strand	AS_structure	AS_type	NT:Seq-id	NT:Score	NT:Evalue	NT:Description	NT_GENE-ID	NR:Seq-id	NR:Score	NR:Evalue	NR:Description	Uniprot:UniProtKB-AC	Uniprot:Score	Uniprot:Evalue	Uniprot:Description	COG:gene	COG:Score	COG:Eval	COG:num	Pfam:pfam_ID	Pfam:pfam_Name	Pfam:pfam_Description	GO:biological_process	GO:cellular_component	GO:molecular_function	KEGG:KO	KEGG:Description
PB.10022	PuSMRT_PB.10022.1_transcript16142_f5p0_1471_g1,PuSMRT_PB.10022.2_transcript19828_f2p0_1261_g1	-	1-,2-	Alternative 3' splice site(A3SS)	gi|566201835|ref|XM_002320645.2|	1317	0	Populus trichocarpa lecithin-cholesterol acyl transferase family protein (POPTR_0014s01470g) mRNA, complete cds	Potri.014G014400	gi|566201836|ref|XP_002320681.2|	2236	0	lecithin-cholesterol acyl transferase family protein [Populus trichocarpa]	Q9FZI8	527	0	Lecithin-cholesterol acyltransferase-like 1	.	.	.	.	pfam02450	LCAT	Lecithin:cholesterol acyltransferase. Lecithin:cholesterol acyltransferase (LCAT) is involved in extracellular metabolizm of plasma lipoproteins, including cholesterol.	GO:0006629|lipid metabolic process;	GO:0016021|integral component of membrane;GO:0005774|vacuolar membrane;GO:0005773|vacuole;	GO:0008374|O-acyltransferase activity;	.	.
PB.10031	PuSMRT_PB.10031.1_transcript9357_f2p0_2049_g1,PuSMRT_PB.10031.2_transcript10441_f7p0_1855_g1	+	0,1^2-	Retained intron(RI)	gi|566201878|ref|XM_002319998.2|	1395	0	Populus trichocarpa interferon-related developmental regulator family protein (POPTR_0014s01710g) mRNA, complete cds	Potri.014G016800	gi|566201879|ref|XP_002320034.2|	1918	0	interferon-related developmental regulator family protein [Populus trichocarpa]	.	.	.	.	.	.	.	.	pfam05004	IFRD	Interferon-related developmental regulator (IFRD). Interferon-related developmental regulator (IFRD1) is the human homologue of the rat early response protein PC4 and its murine homologue TIS7. The exact function of IFRD1 is unknown but it has been shown that PC4 is necessary to muscle differentiation and that it might have a role in signal transduction. This family also contains IFRD2 and its mu…	.	.	.	.	.
PB.10038	PuSMRT_PB.10038.2_transcript35840_f10p0_442_g1/PuSMRT_PB.10038.4_transcript39878_f2p0_291_g1,PuSMRT_PB.10038.3_transcript37092_f3p0_417_g1	-	1-,2-	Alternative 3' splice site(A3SS)	.	.	.	.	.	.	.	.	.	.	.	.	.	.	.	.	.	.	.	.	.	.	.	.	.
PB.10039	PuSMRT_PB.10039.2_transcript33652_f12p0_539_g1,PuSMRT_PB.10039.4_transcript8581_f2p0_2142_g1	-	1^,2^	Alternative 5' splice site(A5SS)	gi|566201904|ref|XM_002320666.2|	713	0	Populus trichocarpa hypothetical protein (POPTR_0014s01870g) mRNA, complete cds	Potri.014G018400	gi|224129914|ref|XP_002320702.1|	234	4e-22	hypothetical protein POPTR_0014s01870g [Populus trichocarpa]	O64818	62	3e-11	Uncharacterized protein At2g23090	.	.	.	.	pfam04419	4F5	4F5 protein family. Members of this family are short proteins that are rich in aspartate, glutamate, lysine and arginine. Although the function of these proteins is unknown, they are found to be ubiquitously expressed.	.	.	GO:0050660|flavin adenine dinucleotide binding;GO:0016491|oxidoreductase activity;	.	.
PB.10069	PuSMRT_PB.10069.1_transcript5041_f2p0_2730_g1/PuSMRT_PB.10069.3_transcript5676_f2p0_2619_g1/PuSMRT_PB.10069.6_transcript5773_f99p0_2544_g1/PuSMRT_PB.10069.8_transcript11539_f2p0_1831_g1/PuSMRT_PB.10069.9_transcript23261_f3p0_1057_g1,PuSMRT_PB.10069.7_transcript6088_f5p0_2535_g1	+	1-,2-	Alternative 3' splice site(A3SS)	gi|566202050|ref|XM_006374842.1|	2561	0	Populus trichocarpa hypothetical protein (POPTR_0014s02550g) mRNA, complete cds	Potri.014G025400	gi|566202051|ref|XP_006374904.1|	2837	0	hypothetical protein POPTR_0014s02550g [Populus trichocarpa]	Q9FXA2	788	0	Polyadenylate-binding protein 8	.	.	.	.	pfam00658	PABP	Poly-adenylate binding protein, unique domain. The region featured in this family is found towards the C-terminus of poly(A)-binding proteins (PABPs). These are eukaryotic proteins that, through their binding of the 3' poly(A) tail on mRNA, have very important roles in the pathways of gene expression. They seem to provide a scaffold on which other proteins can bind and mediate processes such as e…	GO:0006417|regulation of translation;GO:0046686|response to cadmium ion;GO:0016032|viral process;	GO:0005829|cytosol;GO:0005634|nucleus;	GO:0000166|nucleotide binding;GO:0003723|RNA binding;	K13126	PABPC; polyadenylate-binding protein
PB.10069	PuSMRT_PB.10069.2_transcript2930_f2p0_3230_g1,PuSMRT_PB.10069.3_transcript5676_f2p0_2619_g1	+	0,1^2-	Retained intron(RI)	gi|566202050|ref|XM_006374842.1|	2561	0	Populus trichocarpa hypothetical protein (POPTR_0014s02550g) mRNA, complete cds	Potri.014G025400	gi|566202051|ref|XP_006374904.1|	2837	0	hypothetical protein POPTR_0014s02550g [Populus trichocarpa]	Q9FXA2	788	0	Polyadenylate-binding protein 8	.	.	.	.	pfam00658	PABP	Poly-adenylate binding protein, unique domain. The region featured in this family is found towards the C-terminus of poly(A)-binding proteins (PABPs). These are eukaryotic proteins that, through their binding of the 3' poly(A) tail on mRNA, have very important roles in the pathways of gene expression. They seem to provide a scaffold on which other proteins can bind and mediate processes such as e…	GO:0006417|regulation of translation;GO:0046686|response to cadmium ion;GO:0016032|viral process;	GO:0005829|cytosol;GO:0005634|nucleus;	GO:0000166|nucleotide binding;GO:0003723|RNA binding;	K13126	PABPC; polyadenylate-binding protein
PB.10069	PuSMRT_PB.10069.2_transcript2930_f2p0_3230_g1,PuSMRT_PB.10069.4_transcript3158_f5p0_3162_g1	+	0,1^2-	Retained intron(RI)	gi|566202050|ref|XM_006374842.1|	2561	0	Populus trichocarpa hypothetical protein (POPTR_0014s02550g) mRNA, complete cds	Potri.014G025400	gi|566202051|ref|XP_006374904.1|	2837	0	hypothetical protein POPTR_0014s02550g [Populus trichocarpa]	Q9FXA2	788	0	Polyadenylate-binding protein 8	.	.	.	.	pfam00658	PABP	Poly-adenylate binding protein, unique domain. The region featured in this family is found towards the C-terminus of poly(A)-binding proteins (PABPs). These are eukaryotic proteins that, through their binding of the 3' poly(A) tail on mRNA, have very important roles in the pathways of gene expression. They seem to provide a scaffold on which other proteins can bind and mediate processes such as e…	GO:0006417|regulation of translation;GO:0046686|response to cadmium ion;GO:0016032|viral process;	GO:0005829|cytosol;GO:0005634|nucleus;	GO:0000166|nucleotide binding;GO:0003723|RNA binding;	K13126	PABPC; polyadenylate-binding protein
PB.10069	PuSMRT_PB.10069.3_transcript5676_f2p0_2619_g1,PuSMRT_PB.10069.1_transcript5041_f2p0_2730_g1/PuSMRT_PB.10069.6_transcript5773_f99p0_2544_g1/PuSMRT_PB.10069.7_transcript6088_f5p0_2535_g1/PuSMRT_PB.10069.8_transcript11539_f2p0_1831_g1	+	0,1^2-	Retained intron(RI)	gi|566202050|ref|XM_006374842.1|	2561	0	Populus trichocarpa hypothetical protein (POPTR_0014s02550g) mRNA, complete cds	Potri.014G025400	gi|566202051|ref|XP_006374904.1|	2837	0	hypothetical protein POPTR_0014s02550g [Populus trichocarpa]	Q9FXA2	788	0	Polyadenylate-binding protein 8	.	.	.	.	pfam00658	PABP	Poly-adenylate binding protein, unique domain. The region featured in this family is found towards the C-terminus of poly(A)-binding proteins (PABPs). These are eukaryotic proteins that, through their binding of the 3' poly(A) tail on mRNA, have very important roles in the pathways of gene expression. They seem to provide a scaffold on which other proteins can bind and mediate processes such as e…	GO:0006417|regulation of translation;GO:0046686|response to cadmium ion;GO:0016032|viral process;	GO:0005829|cytosol;GO:0005634|nucleus;	GO:0000166|nucleotide binding;GO:0003723|RNA binding;	K13126	PABPC; polyadenylate-binding protein
PB.10069	PuSMRT_PB.10069.4_transcript3158_f5p0_3162_g1,PuSMRT_PB.10069.1_transcript5041_f2p0_2730_g1/PuSMRT_PB.10069.6_transcript5773_f99p0_2544_g1/PuSMRT_PB.10069.8_transcript11539_f2p0_1831_g1	+	0,1^2-	Retained intron(RI)	gi|566202050|ref|XM_006374842.1|	2561	0	Populus trichocarpa hypothetical protein (POPTR_0014s02550g) mRNA, complete cds	Potri.014G025400	gi|566202051|ref|XP_006374904.1|	2837	0	hypothetical protein POPTR_0014s02550g [Populus trichocarpa]	Q9FXA2	788	0	Polyadenylate-binding protein 8	.	.	.	.	pfam00658	PABP	Poly-adenylate binding protein, unique domain. The region featured in this family is found towards the C-terminus of poly(A)-binding proteins (PABPs). These are eukaryotic proteins that, through their binding of the 3' poly(A) tail on mRNA, have very important roles in the pathways of gene expression. They seem to provide a scaffold on which other proteins can bind and mediate processes such as e…	GO:0006417|regulation of translation;GO:0046686|response to cadmium ion;GO:0016032|viral process;	GO:0005829|cytosol;GO:0005634|nucleus;	GO:0000166|nucleotide binding;GO:0003723|RNA binding;	K13126	PABPC; polyadenylate-binding protein
PB.10069	PuSMRT_PB.10069.4_transcript3158_f5p0_3162_g1,PuSMRT_PB.10069.7_transcript6088_f5p0_2535_g1	+	0,1^2-	Retained intron(RI)	gi|566202050|ref|XM_006374842.1|	2561	0	Populus trichocarpa hypothetical protein (POPTR_0014s02550g) mRNA, complete cds	Potri.014G025400	gi|566202051|ref|XP_006374904.1|	2837	0	hypothetical protein POPTR_0014s02550g [Populus trichocarpa]	Q9FXA2	788	0	Polyadenylate-binding protein 8	.	.	.	.	pfam00658	PABP	Poly-adenylate binding protein, unique domain. The region featured in this family is found towards the C-terminus of poly(A)-binding proteins (PABPs). These are eukaryotic proteins that, through their binding of the 3' poly(A) tail on mRNA, have very important roles in the pathways of gene expression. They seem to provide a scaffold on which other proteins can bind and mediate processes such as e…	GO:0006417|regulation of translation;GO:0046686|response to cadmium ion;GO:0016032|viral process;	GO:0005829|cytosol;GO:0005634|nucleus;	GO:0000166|nucleotide binding;GO:0003723|RNA binding;	K13126	PABPC; polyadenylate-binding protein
PB.10084	PuSMRT_PB.10084.2_transcript22591_f2p0_1085_g1,PuSMRT_PB.10084.1_transcript24360_f2p0_1000_g1	-	1-,2-	Alternative 3' splice site(A3SS)	gi|566202124|ref|XM_006374876.1|	1184	0	Populus trichocarpa hypothetical protein (POPTR_0014s02920g) mRNA, complete cds	Potri.014G029200	gi|566202129|ref|XP_006374940.1|	1223	2e-164	hypothetical protein POPTR_0014s02920g [Populus trichocarpa]	Q9C5C5	233	6e-72	Thioredoxin-like 4, chloroplastic	SPAC7D4.07c	49.3	2e-06	COG0526	pfam00085	Thioredoxin	Thioredoxin. Thioredoxins are small enzymes that participate in redox reactions, via the reversible oxidation of an active centre disulfide bond. Some members with only the active site are not separated from the noise.	GO:0045454|cell redox homeostasis;GO:0034599|cellular response to oxidative stress;GO:0006662|glycerol ether metabolic process;GO:0055114|oxidation-reduction process;GO:0006457|protein folding;GO:0000103|sulfate assimilation;	GO:0009507|chloroplast;GO:0009570|chloroplast stroma;GO:0005737|cytoplasm;	GO:0016671|oxidoreductase activity, acting on a sulfur group of donors, disulfide as acceptor;GO:0015035|protein disulfide oxidoreductase activity;	.	.
PB.10128	PuSMRT_PB.10128.1_transcript13188_f11p0_1684_g1,PuSMRT_PB.10128.2_transcript14030_f3p0_1633_g1	-	1-,2-	Alternative 3' splice site(A3SS)	gi|118485762|gb|EF146675.1|	1601	0	Populus trichocarpa clone WS01211_M01 unknown mRNA	Potri.014G041300	gi|118485763|gb|ABK94731.1|	1963	0	unknown [Populus trichocarpa]	Q9SK55	70.5	8e-12	Transcription factor JUNGBRUNNEN 1	.	.	.	.	pfam02365	NAM	No apical meristem (NAM) protein. This is a family of no apical meristem (NAM) proteins these are plant development proteins. Mutations in NAM result in the failure to develop a shoot apical meristem in petunia embryos. NAM is indicated as having a role in determining positions of meristems and primordial. One member of this family NAP (NAC-like, activated by AP3/PI) is encoded by the target gene…	GO:0009718|anthocyanin-containing compound biosynthetic process;GO:0010120|camalexin biosynthetic process;GO:0042538|hyperosmotic salinity response;GO:0010150|leaf senescence;GO:1900056|negative regulation of leaf senescence;GO:0006561|proline biosynthetic process;GO:0006351|transcription, DNA-templated;GO:0005992|trehalose biosynthetic process;	GO:0005634|nucleus;	GO:0003677|DNA binding;GO:0003700|transcription factor activity, sequence-specific DNA binding;	.	.
PB.10171	PuSMRT_PB.10171.2_transcript30757_f2p0_695_g1,PuSMRT_PB.10171.1_transcript33126_f5p0_542_g1	+	0,1^2-	Retained intron(RI)	gi|118482850|gb|EF145154.1|	558	0	Populus trichocarpa clone WS01121_B21 unknown mRNA	Potri.014G056600	gi|118482851|gb|ABK93340.1|	227	1e-21	unknown [Populus trichocarpa]	.	.	.	.	.	.	.	.	pfam10005	DUF2248	Uncharacterized protein conserved in bacteria (DUF2248). Members of this family of hypothetical bacterial proteins have no known function.	.	.	.	.	.
PB.10171	PuSMRT_PB.10171.3_transcript34154_f3p0_560_g1,PuSMRT_PB.10171.1_transcript33126_f5p0_542_g1	+	1-,2-	Alternative 3' splice site(A3SS)	gi|118482850|gb|EF145154.1|	558	0	Populus trichocarpa clone WS01121_B21 unknown mRNA	Potri.014G056600	gi|118482851|gb|ABK93340.1|	227	1e-21	unknown [Populus trichocarpa]	.	.	.	.	.	.	.	.	pfam10005	DUF2248	Uncharacterized protein conserved in bacteria (DUF2248). Members of this family of hypothetical bacterial proteins have no known function.	.	.	.	.	.
PB.1019	PuSMRT_PB.1019.3_transcript5328_f2p0_2663_g1,PuSMRT_PB.1019.2_transcript4613_f4p0_2805_g1	+	1^,2^	Alternative 5' splice site(A5SS)	gi|256782832|gb|AC237586.1|	697	0	Populus trichocarpa clone POP031-J10, complete sequence	Potri.001G305000	.	.	.	.	.	.	.	.	.	.	.	.	pfam05173	DapB_C	Dihydrodipicolinate reductase, C-terminus. Dihydrodipicolinate reductase (DapB) reduces the alpha,beta-unsaturated cyclic imine, dihydro-dipicolinate. This reaction is the second committed step in the biosynthesis of L-lysine and its precursor meso-diaminopimelate, which are critical for both protein and cell wall biosynthesis. The C-terminal domain of DapB has been proposed to be the substrate- …	.	.	.	.	.
PB.10204	PuSMRT_PB.10204.3_transcript3255_f2p0_3168_g1,PuSMRT_PB.10204.2_transcript7805_f3p0_2368_g1	-	1-,2-	Alternative 3' splice site(A3SS)	gi|566202959|ref|XM_002320697.2|	3091	0	Populus trichocarpa hypothetical protein (POPTR_0014s06710g) mRNA, complete cds	Potri.014G071400	gi|566202960|ref|XP_002320733.2|	4612	0	hypothetical protein POPTR_0014s06710g [Populus trichocarpa]	A5WW08	54.3	6e-06	E3 ubiquitin-protein ligase CHFR	.	.	.	.	pfam01576	Myosin_tail_1	Myosin tail. The myosin molecule is a multi-subunit complex made up of two heavy chains and four light chains it is a fundamental contractile protein found in all eukaryote cell types. This family consists of the coiled-coil myosin heavy chain tail region. The coiled-coil is composed of the tail from two molecules of myosin. These can then assemble into the macromolecular thick filament. The coil…	GO:0051301|cell division;GO:0007093|mitotic cell cycle checkpoint;GO:0007067|mitotic nuclear division;GO:0019941|modification-dependent protein catabolic process;GO:0000209|protein polyubiquitination;GO:0006511|ubiquitin-dependent protein catabolic process;	GO:0005634|nucleus;GO:0016605|PML body;	GO:0016874|ligase activity;GO:0000166|nucleotide binding;GO:0004842|ubiquitin-protein transferase activity;GO:0008270|zinc ion binding;	K10644	CHFR; E3 ubiquitin-protein ligase CHFR [EC:2.3.2.27]
PB.10223	PuSMRT_PB.10223.1_transcript11976_f2p0_1797_g1,PuSMRT_PB.10223.2_transcript11917_f2p0_1796_g1	+	1^,2^	Alternative 5' splice site(A5SS)	gi|566203034|ref|XM_002320053.2|	2104	0	Populus trichocarpa hypothetical protein (POPTR_0014s07170g) mRNA, complete cds	Potri.014G075600	gi|566203035|ref|XP_002320089.2|	2326	0	hypothetical protein POPTR_0014s07170g [Populus trichocarpa]	Q4V3D3	266	6e-79	Plant UBX domain-containing protein 9	.	.	.	.	pfam00789	UBX	UBX domain. This domain is present in ubiquitin-regulatory proteins and is a general Cdc48-interacting module.	GO:0010387|COP9 signalosome assembly;GO:0010388|cullin deneddylation;GO:0009793|embryo development ending in seed dormancy;GO:0006972|hyperosmotic response;GO:0006461|protein complex assembly;GO:0000338|protein deneddylation;GO:0009585|red, far-red light phototransduction;GO:0009646|response to absence of light;GO:0009651|response to salt stress;	GO:0008180|COP9 signalosome;GO:0005829|cytosol;	.	.	.
PB.10225	PuSMRT_PB.10225.1_transcript22233_f7p0_1100_g1,PuSMRT_PB.10225.5_transcript23360_f3p0_1044_g1	-	1-,2-	Alternative 3' splice site(A3SS)	gi|566203051|ref|XM_006375262.1|	1121	0	Populus trichocarpa hypothetical protein (POPTR_0014s07250g) mRNA, complete cds	Potri.014G076400	gi|224130140|ref|XP_002320762.1|	1127	2e-148	peroxisomal biogenesis factor 11 family protein [Populus trichocarpa]	O80845	391	2e-131	Peroxisomal membrane protein 11D	.	.	.	.	pfam05648	PEX11	Peroxisomal biogenesis factor 11 (PEX11). This family consists of several peroxisomal biogenesis factor 11 (PEX11) proteins from several eukaryotic species. The PEX11 peroxisomal membrane proteins promote peroxisome division in multiple eukaryotes.	GO:0016559|peroxisome fission;GO:0007031|peroxisome organization;GO:0044375|regulation of peroxisome size;	GO:0009507|chloroplast;GO:0005779|integral component of peroxisomal membrane;GO:0005739|mitochondrion;GO:0005777|peroxisome;	GO:0042802|identical protein binding;	.	.
PB.10239	PuSMRT_PB.10239.2_transcript6449_f21p0_2460_g1/PuSMRT_PB.10239.3_transcript7287_f3p0_2337_g1/PuSMRT_PB.10239.4_transcript25397_f5p0_943_g1,PuSMRT_PB.10239.1_transcript6378_f2p0_2484_g1	+	1^,2^	Alternative 5' splice site(A5SS)	.	.	.	.	.	.	.	.	.	.	.	.	.	.	.	.	.	.	.	.	.	.	.	.	.
PB.10251	PuSMRT_PB.10251.1_transcript17185_f2p0_1392_g1,PuSMRT_PB.10251.2_transcript20105_f2p0_1217_g1	-	1-,2-	Alternative 3' splice site(A3SS)	gi|743789517|ref|XM_011038246.1|	1186	0	PREDICTED: Populus euphratica uncharacterized LOC105134014 (LOC105134014), mRNA	Potri.014G086000	gi|224130304|ref|XP_002320804.1|	1527	0	hypothetical protein POPTR_0014s08180g [Populus trichocarpa]	Q8VY98	200	5e-59	ATG8-interacting protein 2	.	.	.	.	pfam06011	TRP	Transient receptor potential (TRP) ion channel. This family of proteins are transient receptor potential (TRP) ion channels. They are essential for cellular viability and are involved in cell growth and cell wall synthesis. The genes for these proteins are homologous to polycystic kidney disease related ion channel genes.	GO:0006914|autophagy;GO:0015031|protein transport;	GO:0005783|endoplasmic reticulum;GO:0005789|endoplasmic reticulum membrane;GO:0016021|integral component of membrane;GO:0043231|intracellular membrane-bounded organelle;	.	.	.
PB.1033	PuSMRT_PB.1033.2_transcript2364_f2p0_3402_g1,PuSMRT_PB.1033.1_transcript2806_f6p0_3226_g1	+	1^,2^	Alternative 5' splice site(A5SS)	gi|566152061|ref|XM_002300169.2|	3053	0	Populus trichocarpa hypothetical protein (POPTR_0001s31610g) mRNA, complete cds	Potri.001G308600	gi|743904644|ref|XP_011045702.1|	5067	0	PREDICTED: probable LRR receptor-like serine/threonine-protein kinase At1g07650 isoform X1 [Populus euphratica]	C0LGE0	912	0	Probable LRR receptor-like serine/threonine-protein kinase At1g07650	.	.	.	.	pfam07714	Pkinase_Tyr	Protein tyrosine kinase.	.	GO:0016021|integral component of membrane;GO:0005886|plasma membrane;	GO:0005524|ATP binding;GO:0004674|protein serine/threonine kinase activity;	.	.
PB.1033	PuSMRT_PB.1033.2_transcript2364_f2p0_3402_g1,PuSMRT_PB.1033.1_transcript2806_f6p0_3226_g1	+	0,1^2-	Retained intron(RI)	gi|566152061|ref|XM_002300169.2|	3053	0	Populus trichocarpa hypothetical protein (POPTR_0001s31610g) mRNA, complete cds	Potri.001G308600	gi|743904644|ref|XP_011045702.1|	5067	0	PREDICTED: probable LRR receptor-like serine/threonine-protein kinase At1g07650 isoform X1 [Populus euphratica]	C0LGE0	912	0	Probable LRR receptor-like serine/threonine-protein kinase At1g07650	.	.	.	.	pfam07714	Pkinase_Tyr	Protein tyrosine kinase.	.	GO:0016021|integral component of membrane;GO:0005886|plasma membrane;	GO:0005524|ATP binding;GO:0004674|protein serine/threonine kinase activity;	.	.
PB.10356	PuSMRT_PB.10356.2_transcript1865_f2p0_3603_g1,PuSMRT_PB.10356.1_transcript1954_f9p0_3527_g1	-	0,1^2-	Retained intron(RI)	.	.	.	.	.	.	.	.	.	.	.	.	.	.	.	.	.	.	.	.	.	.	.	.	.
PB.10379	PuSMRT_PB.10379.1_transcript3029_f3p0_3203_g1/PuSMRT_PB.10379.2_transcript3641_f2p0_3048_g1,PuSMRT_PB.10379.3_transcript6033_f2p0_2531_g1	+	1-,2-	Alternative 3' splice site(A3SS)	gi|566203744|ref|XM_002320246.2|	3096	0	Populus trichocarpa hypothetical protein (POPTR_0014s11310g) mRNA, complete cds	Potri.014G117800	gi|566203745|ref|XP_002320282.2|	4464	0	hypothetical protein POPTR_0014s11310g [Populus trichocarpa]	F4I8W1	195	4e-51	DUF724 domain-containing protein 2	.	.	.	.	pfam05266	DUF724	Protein of unknown function (DUF724). This family contains several uncharacterized proteins found in Arabidopsis thaliana and other plants. This region is often found associated with Agenet domains and may contain coiled-coil.	GO:0040008|regulation of growth;GO:0006810|transport;	.	.	.	.
PB.10379	PuSMRT_PB.10379.3_transcript6033_f2p0_2531_g1,PuSMRT_PB.10379.1_transcript3029_f3p0_3203_g1/PuSMRT_PB.10379.2_transcript3641_f2p0_3048_g1	+	0,1-2^	Skipped exon(SE)	gi|566203744|ref|XM_002320246.2|	3096	0	Populus trichocarpa hypothetical protein (POPTR_0014s11310g) mRNA, complete cds	Potri.014G117800	gi|566203745|ref|XP_002320282.2|	4464	0	hypothetical protein POPTR_0014s11310g [Populus trichocarpa]	F4I8W1	195	4e-51	DUF724 domain-containing protein 2	.	.	.	.	pfam05266	DUF724	Protein of unknown function (DUF724). This family contains several uncharacterized proteins found in Arabidopsis thaliana and other plants. This region is often found associated with Agenet domains and may contain coiled-coil.	GO:0040008|regulation of growth;GO:0006810|transport;	.	.	.	.
PB.10389	PuSMRT_PB.10389.1_transcript2918_f23p0_3195_g1,PuSMRT_PB.10389.3_transcript3338_f7p0_3120_g1	-	1-,2-	Alternative 3' splice site(A3SS)	gi|566203795|ref|XM_002320938.2|	3232	0	Populus trichocarpa hypothetical protein (POPTR_0014s11570g) mRNA, complete cds	Potri.014G120600	gi|566203796|ref|XP_002320974.2|	4905	0	hypothetical protein POPTR_0014s11570g [Populus trichocarpa]	Q8VZF3	1445	0	Probable glutamyl endopeptidase, chloroplastic	CC2671	579	0	COG1506	pfam00326	Peptidase_S9	Prolyl oligopeptidase family.	.	GO:0009507|chloroplast;GO:0009570|chloroplast stroma;	GO:0008236|serine-type peptidase activity;	.	.
PB.10420	PuSMRT_PB.10420.3_transcript15954_f2p0_1478_g1,PuSMRT_PB.10420.1_transcript15000_f3p0_1552_g1/PuSMRT_PB.10420.2_transcript16635_f30p0_1357_g1	+	0,1^2-	Retained intron(RI)	gi|743870277|ref|XM_011035231.1|	1230	0	PREDICTED: Populus euphratica caffeoylshikimate esterase-like (LOC105131989), mRNA	Potri.014G129000	gi|743870278|ref|XP_011033533.1|	1766	0	PREDICTED: caffeoylshikimate esterase-like [Populus euphratica]	Q9C942	209	1e-60	Caffeoylshikimate esterase	Rv0183	105	4e-24	COG2267	pfam12146	Hydrolase_4	Putative lysophospholipase. This domain is found in bacteria and eukaryotes and is approximately 110 amino acids in length. It is found in association with pfam00561. Many members are annotated as being lysophospholipases, and others as alpha-beta hydrolase fold-containing proteins.	GO:0009809|lignin biosynthetic process;GO:0006629|lipid metabolic process;GO:0046686|response to cadmium ion;GO:0042542|response to hydrogen peroxide;GO:0006979|response to oxidative stress;GO:0010043|response to zinc ion;	GO:0005783|endoplasmic reticulum;GO:0005794|Golgi apparatus;GO:0005886|plasma membrane;GO:0009506|plasmodesma;	GO:0003846|2-acylglycerol O-acyltransferase activity;GO:0090430|caffeoyl-CoA: alcohol caffeoyl transferase activity;GO:0016787|hydrolase activity;GO:0004622|lysophospholipase activity;	K18368	CSE; caffeoylshikimate esterase [EC:3.1.1.-]
PB.10443	PuSMRT_PB.10443.2_transcript2849_f2p0_3260_g1,PuSMRT_PB.10443.1_transcript2914_f2p0_3235_g1	+	1-,2-	Alternative 3' splice site(A3SS)	gi|224128627|ref|XM_002320343.1|	3978	0	Populus trichocarpa hypothetical protein (POPTR_0014s13140g) mRNA, complete cds	Potri.014G135700	gi|224128628|ref|XP_002320379.1|	6760	0	hypothetical protein POPTR_0014s13140g [Populus trichocarpa]	F4JI44	467	1e-143	Nodulin homeobox	.	.	.	.	pfam12726	SEN1_N	SEN1 N terminal. This domain is found at the N terminal of the helicase SEN1. SEN1 is a Pol II termination factor for noncoding RNA genes. The N terminal of SEN1, unlike the C terminal, is not required for growth.	GO:0009908|flower development;GO:0060195|negative regulation of antisense RNA transcription;	GO:0005730|nucleolus;GO:0005634|nucleus;	GO:0003697|single-stranded DNA binding;	.	.
PB.10443	PuSMRT_PB.10443.2_transcript2849_f2p0_3260_g1,PuSMRT_PB.10443.1_transcript2914_f2p0_3235_g1	+	1-,2-	Alternative 3' splice site(A3SS)	gi|224128627|ref|XM_002320343.1|	3978	0	Populus trichocarpa hypothetical protein (POPTR_0014s13140g) mRNA, complete cds	Potri.014G135700	gi|224128628|ref|XP_002320379.1|	6760	0	hypothetical protein POPTR_0014s13140g [Populus trichocarpa]	F4JI44	467	1e-143	Nodulin homeobox	.	.	.	.	pfam12726	SEN1_N	SEN1 N terminal. This domain is found at the N terminal of the helicase SEN1. SEN1 is a Pol II termination factor for noncoding RNA genes. The N terminal of SEN1, unlike the C terminal, is not required for growth.	GO:0009908|flower development;GO:0060195|negative regulation of antisense RNA transcription;	GO:0005730|nucleolus;GO:0005634|nucleus;	GO:0003697|single-stranded DNA binding;	.	.
PB.10443	PuSMRT_PB.10443.2_transcript2849_f2p0_3260_g1,PuSMRT_PB.10443.1_transcript2914_f2p0_3235_g1	+	1-,2-	Alternative 3' splice site(A3SS)	gi|224128627|ref|XM_002320343.1|	3978	0	Populus trichocarpa hypothetical protein (POPTR_0014s13140g) mRNA, complete cds	Potri.014G135700	gi|224128628|ref|XP_002320379.1|	6760	0	hypothetical protein POPTR_0014s13140g [Populus trichocarpa]	F4JI44	467	1e-143	Nodulin homeobox	.	.	.	.	pfam12726	SEN1_N	SEN1 N terminal. This domain is found at the N terminal of the helicase SEN1. SEN1 is a Pol II termination factor for noncoding RNA genes. The N terminal of SEN1, unlike the C terminal, is not required for growth.	GO:0009908|flower development;GO:0060195|negative regulation of antisense RNA transcription;	GO:0005730|nucleolus;GO:0005634|nucleus;	GO:0003697|single-stranded DNA binding;	.	.
PB.10468	PuSMRT_PB.10468.2_transcript10216_f2p0_1954_g1,PuSMRT_PB.10468.1_transcript15099_f6p0_1497_g1	-	0,1^2-	Retained intron(RI)	gi|566204140|ref|XM_002321029.2|	1438	0	Populus trichocarpa hypothetical protein (POPTR_0014s13660g) mRNA, complete cds	Potri.014G140500	gi|566204141|ref|XP_002321065.2|	1803	0	hypothetical protein POPTR_0014s13660g [Populus trichocarpa]	P25856	615	0	Glyceraldehyde-3-phosphate dehydrogenase GAPA1, chloroplastic	sll1342	399	1e-133	COG0057	pfam00044	Gp_dh_N	Glyceraldehyde 3-phosphate dehydrogenase, NAD binding domain. GAPDH is a tetrameric NAD-binding enzyme involved in glycolysis and glyconeogenesis. N-terminal domain is a Rossmann NAD(P) binding fold.	GO:0006006|glucose metabolic process;GO:0019253|reductive pentose-phosphate cycle;GO:0009409|response to cold;GO:0009416|response to light stimulus;GO:0009744|response to sucrose;	GO:0048046|apoplast;GO:0009507|chloroplast;GO:0009941|chloroplast envelope;GO:0031969|chloroplast membrane;GO:0009570|chloroplast stroma;GO:0009535|chloroplast thylakoid membrane;GO:0016020|membrane;GO:0010319|stromule;	GO:0047100|glyceraldehyde-3-phosphate dehydrogenase (NADP+) (phosphorylating) activity;GO:0051287|NAD binding;GO:0050661|NADP binding;	K05298	GAPA; glyceraldehyde-3-phosphate dehydrogenase (NADP+) (phosphorylating) [EC:1.2.1.13]
PB.10475	PuSMRT_PB.10475.2_transcript9270_f2p0_2074_g1,PuSMRT_PB.10475.1_transcript10361_f7p0_1939_g1	+	1-,2-	Alternative 3' splice site(A3SS)	gi|566204165|ref|XM_006375426.1|	2606	0	Populus trichocarpa hypothetical protein (POPTR_0014s13840g) mRNA, complete cds	Potri.014G141800	gi|566204166|ref|XP_006375488.1|	2751	0	hypothetical protein POPTR_0014s13840g [Populus trichocarpa]	Q84K11	944	0	Serine/threonine-protein phosphatase 5	SPBC3F6.01c_2	358	4e-114	COG0639	pfam00149	Metallophos	Calcineurin-like phosphoesterase. This family includes a diverse range of phosphoesterases, including protein phosphoserine phosphatases, nucleotidases, sphingomyelin phosphodiesterases and 2'-3' cAMP phosphodiesterases as well as nucleases such as bacterial SbcD or yeast MRE11. The most conserved regions in this superfamily centre around the metal chelating residues.	.	GO:0005789|endoplasmic reticulum membrane;GO:0016021|integral component of membrane;GO:0031965|nuclear membrane;GO:0016607|nuclear speck;	GO:0046872|metal ion binding;GO:0004721|phosphoprotein phosphatase activity;	K04460	PPP5C; serine/threonine-protein phosphatase 5 [EC:3.1.3.16]
PB.10478	PuSMRT_PB.10478.2_transcript24182_f2p0_1004_g1,PuSMRT_PB.10478.1_transcript17223_f8p0_1390_g1	+	1^,2^	Alternative 5' splice site(A5SS)	gi|118489592|gb|EF148636.1|	1384	0	Populus trichocarpa x Populus deltoides clone WS0135_H09 unknown mRNA	Potri.014G142200	gi|118489593|gb|ABK96598.1|	1681	0	unknown [Populus trichocarpa x Populus deltoides]	.	.	.	.	.	.	.	.	pfam03899	ATP_synt_I	ATP synthase I chain.	.	.	.	.	.
PB.10479	PuSMRT_PB.10479.2_transcript3797_f2p0_3000_g1,PuSMRT_PB.10479.1_transcript3621_f2p0_3047_g1	-	1-,2-	Alternative 3' splice site(A3SS)	gi|566204175|ref|XM_002321036.2|	3093	0	Populus trichocarpa hypothetical protein (POPTR_0014s13940g) mRNA, complete cds	Potri.014G142700	gi|224131388|ref|XP_002321072.1|	4301	0	hypothetical protein POPTR_0014s13940g [Populus trichocarpa]	Q9SIM9	347	3e-102	F-box protein MAX2	.	.	.	.	pfam14381	EDR1	Ethylene-responsive protein kinase Le-CTR1. EDR1 regulates disease resistance and ethylene-induced senescence, and is also involved in stress response signalling and cell death regulation.	GO:0009926|auxin polar transport;GO:0009734|auxin-activated signaling pathway;GO:0042335|cuticle development;GO:0010187|negative regulation of seed germination;GO:1902584|positive regulation of response to water deprivation;GO:0016567|protein ubiquitination;GO:0009934|regulation of meristem structural organization;GO:0009416|response to light stimulus;GO:0009414|response to water deprivation;GO:0…	GO:0005634|nucleus;GO:0019005|SCF ubiquitin ligase complex;	.	.	.
PB.10479	PuSMRT_PB.10479.2_transcript3797_f2p0_3000_g1,PuSMRT_PB.10479.1_transcript3621_f2p0_3047_g1	-	1-,2-	Alternative 3' splice site(A3SS)	gi|566204175|ref|XM_002321036.2|	3093	0	Populus trichocarpa hypothetical protein (POPTR_0014s13940g) mRNA, complete cds	Potri.014G142700	gi|224131388|ref|XP_002321072.1|	4301	0	hypothetical protein POPTR_0014s13940g [Populus trichocarpa]	Q9SIM9	347	3e-102	F-box protein MAX2	.	.	.	.	pfam14381	EDR1	Ethylene-responsive protein kinase Le-CTR1. EDR1 regulates disease resistance and ethylene-induced senescence, and is also involved in stress response signalling and cell death regulation.	GO:0009926|auxin polar transport;GO:0009734|auxin-activated signaling pathway;GO:0042335|cuticle development;GO:0010187|negative regulation of seed germination;GO:1902584|positive regulation of response to water deprivation;GO:0016567|protein ubiquitination;GO:0009934|regulation of meristem structural organization;GO:0009416|response to light stimulus;GO:0009414|response to water deprivation;GO:0…	GO:0005634|nucleus;GO:0019005|SCF ubiquitin ligase complex;	.	.	.
PB.10523	PuSMRT_PB.10523.1_transcript12678_f3p0_1730_g1,PuSMRT_PB.10523.2_transcript13561_f2p0_1666_g1	+	1^,2^	Alternative 5' splice site(A5SS)	gi|743907647|ref|XM_011048953.1|	258	1e-131	PREDICTED: Populus euphratica 5'-adenylylsulfate reductase 3, chloroplastic-like (LOC105141663), transcript variant X2, mRNA	Potri.014G154300	.	.	.	.	.	.	.	.	.	.	.	.	pfam10592	AIPR	AIPR protein. This family of proteins was identified in as an abortive infection phage resistance protein often found in restriction modification system operons.	.	.	.	.	.
PB.10525	PuSMRT_PB.10525.2_transcript3237_f4p0_3109_g1,PuSMRT_PB.10525.1_transcript3138_f2p0_3197_g1	+	0,1-2^	Skipped exon(SE)	gi|566204407|ref|XM_002321231.2|	3074	0	Populus trichocarpa hypothetical protein (POPTR_0014s15270g) mRNA, complete cds	Potri.014G154600	gi|566204408|ref|XP_002321267.2|	4020	0	hypothetical protein POPTR_0014s15270g [Populus trichocarpa]	P79051	427	1e-130	ATP-dependent helicase rhp16	.	.	.	.	pfam00176	SNF2_N	SNF2 family N-terminal domain. This domain is found in proteins involved in a variety of processes including transcription regulation (e.g., SNF2, STH1, brahma, MOT1), DNA repair (e.g., ERCC6, RAD16, RAD5), DNA recombination (e.g., RAD54), and chromatin unwinding (e.g., ISWI) as well as a variety of other proteins with little functional information (e.g., lodestar, ETL1).	GO:0006289|nucleotide-excision repair;GO:0006290|pyrimidine dimer repair;	GO:0000109|nucleotide-excision repair complex;GO:0005634|nucleus;	GO:0005524|ATP binding;GO:0003677|DNA binding;GO:0004386|helicase activity;GO:0008270|zinc ion binding;	.	.
PB.10553	PuSMRT_PB.10553.2_transcript17530_f4p0_1368_g1,PuSMRT_PB.10553.3_transcript18403_f2p0_1317_g1	+	1^,2^	Alternative 5' splice site(A5SS)	gi|743918977|ref|XM_011005200.1|	883	0	PREDICTED: Populus euphratica formate dehydrogenase, mitochondrial (LOC105110225), mRNA	Potri.014G161300	gi|743918978|ref|XP_011003502.1|	1197	3e-154	PREDICTED: formate dehydrogenase, mitochondrial [Populus euphratica]	Q07511	409	1e-133	Formate dehydrogenase, mitochondrial	SMa0478	203	7e-57	COG1052	pfam02826	2-Hacid_dh_C	D-isomer specific 2-hydroxyacid dehydrogenase, NAD binding domain. This domain is inserted into the catalytic domain, the large dehydrogenase and D-lactate dehydrogenase families in SCOP. N-terminal portion of which is represented by family pfam00389.	GO:0042183|formate catabolic process;	GO:0005739|mitochondrion;	GO:0008863|formate dehydrogenase (NAD+) activity;GO:0051287|NAD binding;GO:0016616|oxidoreductase activity, acting on the CH-OH group of donors, NAD or NADP as acceptor;	K00122	FDH; formate dehydrogenase [EC:1.2.1.2]
PB.10572	PuSMRT_PB.10572.2_transcript6960_f5p0_2402_g1/PuSMRT_PB.10572.4_transcript14445_f2p0_1642_g1,PuSMRT_PB.10572.1_transcript6224_f3p0_2503_g1/PuSMRT_PB.10572.3_transcript11346_f2p0_1853_g1/PuSMRT_PB.10572.5_transcript20630_f2p0_1200_g1	+	1-,2-	Alternative 3' splice site(A3SS)	gi|743922655|ref|XM_011007100.1|	1658	0	PREDICTED: Populus euphratica zinc finger CCCH domain-containing protein 18-like (LOC105111667), transcript variant X2, mRNA	Potri.014G165500	gi|743922654|ref|XP_011005401.1|	2594	0	PREDICTED: zinc finger CCCH domain-containing protein 18-like isoform X1 [Populus euphratica]	Q9SJ41	477	1e-156	Zinc finger CCCH domain-containing protein 18	.	.	.	.	pfam14259	RRM_6	RNA recognition motif (a.k.a. RRM, RBD, or RNP domain).	.	.	GO:0003677|DNA binding;GO:0046872|metal ion binding;GO:0004518|nuclease activity;GO:0000166|nucleotide binding;GO:0003723|RNA binding;	.	.
PB.10586	PuSMRT_PB.10586.1_transcript2987_f2p0_3230_g1,PuSMRT_PB.10586.4_transcript5416_f9p0_2583_g1	-	1-,2-	Alternative 3' splice site(A3SS)	gi|566204660|ref|XM_002321169.2|	2257	0	Populus trichocarpa long-chain-fatty-acid--CoA ligase family protein (POPTR_0014s16750g) mRNA, complete cds	Potri.014G169400	gi|743927786|ref|XP_011008078.1|	3588	0	PREDICTED: LOW QUALITY PROTEIN: long chain acyl-CoA synthetase 8 [Populus euphratica]	Q9SJD4	1051	0	Long chain acyl-CoA synthetase 8	SPBC18H10.02	357	6e-108	COG1022	pfam00501	AMP-binding	AMP-binding enzyme.	GO:0006631|fatty acid metabolic process;	GO:0009941|chloroplast envelope;GO:0005783|endoplasmic reticulum;GO:0005794|Golgi apparatus;	GO:0005524|ATP binding;GO:0004467|long-chain fatty acid-CoA ligase activity;	K01897	ACSL, fadD; long-chain acyl-CoA synthetase [EC:6.2.1.3]
PB.10601	PuSMRT_PB.10601.5_transcript23324_f2p0_1051_g1,PuSMRT_PB.10601.1_transcript19463_f2p0_1254_g1/PuSMRT_PB.10601.4_transcript21832_f304p0_1076_g1	-	0,1-2^	Skipped exon(SE)	gi|566204717|ref|XM_002321182.2|	1253	0	Populus trichocarpa chlorophyll A-B binding family protein (POPTR_0014s17070g) mRNA, complete cds	Potri.014G172400	gi|224131950|ref|XP_002321218.1|	1073	3e-141	chlorophyll A-B binding family protein [Populus trichocarpa]	P27522	368	3e-123	Chlorophyll a-b binding protein 8, chloroplastic	.	.	.	.	pfam00504	Chloroa_b-bind	Chlorophyll A-B binding protein.	GO:0009768|photosynthesis, light harvesting in photosystem I;GO:0018298|protein-chromophore linkage;GO:0009416|response to light stimulus;	GO:0009941|chloroplast envelope;GO:0009535|chloroplast thylakoid membrane;GO:0016021|integral component of membrane;GO:0009522|photosystem I;GO:0009523|photosystem II;GO:0010287|plastoglobule;	GO:0016168|chlorophyll binding;GO:0046872|metal ion binding;GO:0031409|pigment binding;	.	.
PB.10609	PuSMRT_PB.10609.2_transcript9637_f4p0_2016_g1,PuSMRT_PB.10609.1_transcript8341_f7p0_2173_g1	+	0,1-2^	Skipped exon(SE)	gi|566204764|ref|XM_002320523.2|	2426	0	Populus trichocarpa hypothetical protein (POPTR_0014s17360g) mRNA, complete cds	Potri.014G175200	gi|566204765|ref|XP_002320559.2|	2766	0	hypothetical protein POPTR_0014s17360g [Populus trichocarpa]	Q67ZB3	629	0	FRIGIDA-like protein 3	.	.	.	.	pfam07899	Frigida	Frigida-like protein. This family is composed of plant proteins that are similar to FRIGIDA protein expressed by Arabidopsis thaliana. This protein is probably nuclear and is required for the regulation of flowering time in the late-flowering phenotype. It is known to increase RNA levels of flowering locus C. Allelic variation at the FRIGIDA locus is a major determinant of natural variation in fl…	GO:0030154|cell differentiation;GO:0009908|flower development;	.	.	.	.
PB.10628	PuSMRT_PB.10628.1_transcript9046_f2p0_2144_g1,PuSMRT_PB.10628.2_transcript8736_f11p0_2110_g1	+	1-,2-	Alternative 3' splice site(A3SS)	gi|566204862|ref|XM_002320548.2|	1796	0	Populus trichocarpa ECERIFERUM 1 family protein (POPTR_0014s17850g) mRNA, complete cds	Potri.014G180300	gi|224129430|ref|XP_002320584.1|	3147	0	ECERIFERUM 1 family protein [Populus trichocarpa]	F4HVY0	773	0	Protein ECERIFERUM 1	.	.	.	.	pfam12076	Wax2_C	WAX2 C-terminal domain. This presumed domain is functionally uncharacterized. This domain is found in eukaryotes. This domain is about 170 amino acids in length. This domain is found associated with pfam04116. This domain has a conserved LEGW sequence motif. This region has similarity to short chain dehydrogenases.	GO:0006633|fatty acid biosynthetic process;GO:0006629|lipid metabolic process;	GO:0005789|endoplasmic reticulum membrane;GO:0016021|integral component of membrane;	GO:0005506|iron ion binding;GO:0016491|oxidoreductase activity;	K15404	K15404, CER1; aldehyde decarbonylase [EC:4.1.99.5]
PB.10628	PuSMRT_PB.10628.2_transcript8736_f11p0_2110_g1,PuSMRT_PB.10628.1_transcript9046_f2p0_2144_g1	+	1^,2^	Alternative 5' splice site(A5SS)	gi|566204862|ref|XM_002320548.2|	1796	0	Populus trichocarpa ECERIFERUM 1 family protein (POPTR_0014s17850g) mRNA, complete cds	Potri.014G180300	gi|224129430|ref|XP_002320584.1|	3147	0	ECERIFERUM 1 family protein [Populus trichocarpa]	F4HVY0	773	0	Protein ECERIFERUM 1	.	.	.	.	pfam12076	Wax2_C	WAX2 C-terminal domain. This presumed domain is functionally uncharacterized. This domain is found in eukaryotes. This domain is about 170 amino acids in length. This domain is found associated with pfam04116. This domain has a conserved LEGW sequence motif. This region has similarity to short chain dehydrogenases.	GO:0006633|fatty acid biosynthetic process;GO:0006629|lipid metabolic process;	GO:0005789|endoplasmic reticulum membrane;GO:0016021|integral component of membrane;	GO:0005506|iron ion binding;GO:0016491|oxidoreductase activity;	K15404	K15404, CER1; aldehyde decarbonylase [EC:4.1.99.5]
PB.10655	PuSMRT_PB.10655.1_transcript7608_f4p0_2276_g1,PuSMRT_PB.10655.2_transcript8826_f7p0_2069_g1	-	0,1^2-	Retained intron(RI)	gi|743940772|ref|XM_011016558.1|	1652	0	PREDICTED: Populus euphratica NACHT, LRR and PYD domains-containing protein 13 (LOC105118587), transcript variant X2, mRNA	Potri.014G194800	gi|566204977|ref|XP_002321304.2|	2500	0	hypothetical protein POPTR_0014s18520g [Populus trichocarpa]	.	.	.	.	.	.	.	.	pfam12799	LRR_4	Leucine Rich repeats (2 copies). Leucine rich repeats are short sequence motifs present in a number of proteins with diverse functions and cellular locations. These repeats are usually involved in protein-protein interactions. Each Leucine Rich Repeat is composed of a beta-alpha unit. These units form elongated non-globular structures. Leucine Rich Repeats are often flanked by cysteine rich domai…	.	.	.	.	.
PB.10665	PuSMRT_PB.10665.1_transcript16775_f5p0_1367_g1,PuSMRT_PB.10665.2_transcript18691_f2p0_1302_g1	-	1-,2-	Alternative 3' splice site(A3SS)	gi|566204733|ref|XM_002320514.2|	1122	0	Populus trichocarpa hypothetical protein (POPTR_0014s17170g) mRNA, complete cds	Potri.014G197500	gi|224129298|ref|XP_002320550.1|	1764	0	hypothetical protein POPTR_0014s17170g [Populus trichocarpa]	Q0WRW8	402	7e-137	Cytochrome b561 and DOMON domain-containing protein At3g07570	.	.	.	.	pfam03351	DOMON	DOMON domain. The DOMON (named after dopamine beta-monooxygenase N-terminal) domain is 110-125 residues long. It is predicted to form an all beta fold with up to 11 strands and is secreted to the extracellular compartment. The beta-strand folding produces a hydrophobic pocket which appears to bind soluble haem. This is consistent with the predominant architectures where the protein is associated …	GO:0055114|oxidation-reduction process;	GO:0016021|integral component of membrane;	GO:0046872|metal ion binding;	.	.
PB.10705	PuSMRT_PB.10705.1_transcript5269_f2p0_2674_g1/PuSMRT_PB.10705.2_transcript8806_f2p0_2128_g1,PuSMRT_PB.10705.3_transcript7821_f3p0_2258_g1	-	0,1^2-	Retained intron(RI)	gi|566205340|ref|XM_002321947.2|	2493	0	Populus trichocarpa hypothetical protein (POPTR_0015s01170g) mRNA, complete cds	Potri.015G009400	gi|566205341|ref|XP_002321983.2|	2674	0	hypothetical protein POPTR_0015s01170g [Populus trichocarpa]	Q9FN03	115	5e-26	Ultraviolet-B receptor UVR8	ECU04g1500	63.5	1e-09	COG5184	pfam00415	RCC1	Regulator of chromosome condensation (RCC1) repeat.	GO:0009649|entrainment of circadian clock;GO:0018298|protein-chromophore linkage;GO:0009411|response to UV;GO:0010224|response to UV-B;	GO:0000785|chromatin;GO:0005829|cytosol;GO:0005634|nucleus;	GO:0003682|chromatin binding;GO:0005085|guanyl-nucleotide exchange factor activity;GO:0009881|photoreceptor activity;GO:0042803|protein homodimerization activity;	.	.
PB.10727	PuSMRT_PB.10727.3_transcript1923_f2p0_3565_g1,PuSMRT_PB.10727.4_transcript8728_f2p0_2125_g1	-	0,1^2-	Retained intron(RI)	gi|566205406|ref|XM_006374040.1|	2641	0	Populus trichocarpa hypothetical protein (POPTR_0015s01610g) mRNA, complete cds	Potri.015G013700	gi|566205407|ref|XP_006374102.1|	2937	0	hypothetical protein POPTR_0015s01610g [Populus trichocarpa]	Q9M3B0	758	0	Probable pectinesterase/pectinesterase inhibitor 34	CAC3373	130	7e-32	COG4677	pfam01095	Pectinesterase	Pectinesterase.	GO:0042545|cell wall modification;GO:0045490|pectin catabolic process;	GO:0071944|cell periphery;GO:0005618|cell wall;GO:0016021|integral component of membrane;	GO:0045330|aspartyl esterase activity;GO:0030599|pectinesterase activity;GO:0046910|pectinesterase inhibitor activity;	.	.
PB.10752	PuSMRT_PB.10752.1_transcript33820_f4p0_498_g1,PuSMRT_PB.10752.2_transcript34095_f4p0_527_g1	-	0,1^2-	Retained intron(RI)	gi|160956850|emb|CU231360.1|	360	0	Populus EST from mild drought-stressed leaves	Potri.015G025500	gi|566206083|ref|XP_006374304.1|	384	2e-43	hypothetical protein POPTR_0015s05860g [Populus trichocarpa]	.	.	.	.	.	.	.	.	pfam09758	FPL	Uncharacterized conserved protein. This entry represents an N-terminal region of approximately 150 residues of a family of proteins of unknown function. It contains a highly conserved FPL motif.	.	.	.	.	.
PB.10811	PuSMRT_PB.10811.1_transcript431_f2p0_4625_g1,PuSMRT_PB.10811.2_transcript631_f4p0_4322_g1	-	1-,2-	Alternative 3' splice site(A3SS)	gi|566205752|ref|XM_002321465.2|	4520	0	Populus trichocarpa hypothetical protein (POPTR_0015s04160g) mRNA, complete cds	Potri.015G042500	gi|566205753|ref|XP_002321501.2|	5939	0	hypothetical protein POPTR_0015s04160g [Populus trichocarpa]	F4HYJ7	1627	0	DExH-box ATP-dependent RNA helicase DExH3	SPBC15C4.05	330	2e-91	COG1643	pfam04408	HA2	Helicase associated domain (HA2). This presumed domain is about 90 amino acid residues in length. It is found is a diverse set of RNA helicases. Its function is unknown, however it seems likely to be involved in nucleic acid binding.	.	.	GO:0005524|ATP binding;GO:0004386|helicase activity;GO:0003723|RNA binding;	K14442	DHX36, RHAU; ATP-dependent RNA helicase DHX36 [EC:3.6.4.13]
PB.10895	PuSMRT_PB.10895.3_transcript16392_f3p0_1449_g1,PuSMRT_PB.10895.2_transcript15399_f4p0_1522_g1	-	1^,2^	Alternative 5' splice site(A5SS)	gi|743850322|ref|XM_011030400.1|	1406	0	PREDICTED: Populus euphratica dnaJ homolog subfamily B member 1-like (LOC105128639), mRNA	Potri.015G066100	gi|224135657|ref|XP_002322128.1|	1599	0	DNAJ heat shock family protein [Populus trichocarpa]	O89114	225	1e-66	DnaJ homolog subfamily B member 5	.	.	.	.	pfam00226	DnaJ	DnaJ domain. DnaJ domains (J-domains) are associated with hsp70 heat-shock system and it is thought that this domain mediates the interaction. DnaJ-domain is therefore part of a chaperone (protein folding) system. The T-antigens, although not in Prosite are confirmed as DnaJ containing domains from literature.	GO:0000122|negative regulation of transcription from RNA polymerase II promoter;GO:0006457|protein folding;GO:0006986|response to unfolded protein;	GO:0005829|cytosol;GO:0005634|nucleus;	GO:0051087|chaperone binding;GO:0051082|unfolded protein binding;	K09511	DNAJB5; DnaJ homolog subfamily B member 5
PB.10899	PuSMRT_PB.10899.2_transcript1298_f2p0_3831_g1,PuSMRT_PB.10899.1_transcript2551_f4p0_3329_g1	+	0,1^2-	Retained intron(RI)	gi|743850205|ref|XM_011030368.1|	3119	0	PREDICTED: Populus euphratica transportin-3-like (LOC105128619), mRNA	Potri.015G068600	gi|743850206|ref|XP_011028670.1|	4904	0	PREDICTED: transportin-3-like [Populus euphratica]	Q8GUL2	1452	0	Transportin MOS14	.	.	.	.	pfam08389	Xpo1	Exportin 1-like protein. The sequences featured in this family are similar to a region close to the N-terminus of yeast exportin 1 (Xpo1, Crm1). This region is found just C-terminal to an importin-beta N-terminal domain (pfam03810) in many members of this family. Exportin 1 is a nuclear export receptor that interacts with leucine-rich nuclear export signal (NES) sequences, and Ran-GTP, and is inv…	GO:0006606|protein import into nucleus;GO:0043484|regulation of RNA splicing;	GO:0005737|cytoplasm;GO:0031965|nuclear membrane;GO:0005634|nucleus;	GO:0008139|nuclear localization sequence binding;GO:0008565|protein transporter activity;	K15436	TRPO3, MTR10; transportin-3
PB.10899	PuSMRT_PB.10899.2_transcript1298_f2p0_3831_g1,PuSMRT_PB.10899.1_transcript2551_f4p0_3329_g1	+	0,1^2-	Retained intron(RI)	gi|743850205|ref|XM_011030368.1|	3119	0	PREDICTED: Populus euphratica transportin-3-like (LOC105128619), mRNA	Potri.015G068600	gi|743850206|ref|XP_011028670.1|	4904	0	PREDICTED: transportin-3-like [Populus euphratica]	Q8GUL2	1452	0	Transportin MOS14	.	.	.	.	pfam08389	Xpo1	Exportin 1-like protein. The sequences featured in this family are similar to a region close to the N-terminus of yeast exportin 1 (Xpo1, Crm1). This region is found just C-terminal to an importin-beta N-terminal domain (pfam03810) in many members of this family. Exportin 1 is a nuclear export receptor that interacts with leucine-rich nuclear export signal (NES) sequences, and Ran-GTP, and is inv…	GO:0006606|protein import into nucleus;GO:0043484|regulation of RNA splicing;	GO:0005737|cytoplasm;GO:0031965|nuclear membrane;GO:0005634|nucleus;	GO:0008139|nuclear localization sequence binding;GO:0008565|protein transporter activity;	K15436	TRPO3, MTR10; transportin-3
PB.10899	PuSMRT_PB.10899.2_transcript1298_f2p0_3831_g1,PuSMRT_PB.10899.1_transcript2551_f4p0_3329_g1	+	1^,2^	Alternative 5' splice site(A5SS)	gi|743850205|ref|XM_011030368.1|	3119	0	PREDICTED: Populus euphratica transportin-3-like (LOC105128619), mRNA	Potri.015G068600	gi|743850206|ref|XP_011028670.1|	4904	0	PREDICTED: transportin-3-like [Populus euphratica]	Q8GUL2	1452	0	Transportin MOS14	.	.	.	.	pfam08389	Xpo1	Exportin 1-like protein. The sequences featured in this family are similar to a region close to the N-terminus of yeast exportin 1 (Xpo1, Crm1). This region is found just C-terminal to an importin-beta N-terminal domain (pfam03810) in many members of this family. Exportin 1 is a nuclear export receptor that interacts with leucine-rich nuclear export signal (NES) sequences, and Ran-GTP, and is inv…	GO:0006606|protein import into nucleus;GO:0043484|regulation of RNA splicing;	GO:0005737|cytoplasm;GO:0031965|nuclear membrane;GO:0005634|nucleus;	GO:0008139|nuclear localization sequence binding;GO:0008565|protein transporter activity;	K15436	TRPO3, MTR10; transportin-3
PB.10912	PuSMRT_PB.10912.1_transcript6538_f3p0_2451_g1,PuSMRT_PB.10912.2_transcript30246_f7p0_658_g1/PuSMRT_PB.10912.3_transcript34491_f2p0_556_g1	+	0,1^2-	Retained intron(RI)	.	.	.	.	Potri.015G072200	.	.	.	.	.	.	.	.	.	.	.	.	pfam10317	7TM_GPCR_Srd	Serpentine type 7TM GPCR chemoreceptor Srd. Chemoreception is mediated in Caenorhabditis elegans by members of the seven-transmembrane G-protein-coupled receptor class (7TM GPCRs) of proteins which are of the serpentine type. Srd is part of the larger Str superfamily of chemoreceptors. Chemoperception is one of the central senses of soil nematodes like C. elegans which are otherwise 'blind' and '…	.	.	.	.	.
PB.10932	PuSMRT_PB.10932.2_transcript4502_f2p0_2828_g1,PuSMRT_PB.10932.1_transcript10322_f2p0_1942_g1	+	0,1^2-	Retained intron(RI)	gi|566206653|ref|XM_006374456.1|	2087	0	Populus trichocarpa hypothetical protein (POPTR_0015s08730g) mRNA, complete cds	Potri.015G076100	gi|566206654|ref|XP_006374518.1|	2249	0	hypothetical protein POPTR_0015s08730g [Populus trichocarpa]	Q9FXT6	313	4e-96	Peroxisomal membrane protein PEX14	.	.	.	.	pfam04695	Pex14_N	Peroxisomal membrane anchor protein (Pex14p) conserved region. Family of peroxisomal membrane anchor proteins which bind the PTS1 (peroxisomal targeting signal) receptor and are required for the import of PTS1-containing proteins into peroxisomes. Loss of functional Pex14p results in defects in both the PTS1 and PTS2-dependent import pathways. Deletion analysis of this conserved region implicates…	GO:0007031|peroxisome organization;GO:0016560|protein import into peroxisome matrix, docking;GO:0006625|protein targeting to peroxisome;	GO:0005829|cytosol;GO:0016021|integral component of membrane;GO:0005739|mitochondrion;GO:0005778|peroxisomal membrane;GO:0005777|peroxisome;GO:0005886|plasma membrane;	GO:0008565|protein transporter activity;	K13343	PEX14; peroxin-14
PB.10945	PuSMRT_PB.10945.2_transcript16172_f2p0_1462_g1,PuSMRT_PB.10945.1_transcript15352_f2p0_1526_g1	-	0,1-2^	Skipped exon(SE)	gi|566206723|ref|XM_002322140.2|	1756	0	Populus trichocarpa hypothetical protein (POPTR_0015s09120g) mRNA, complete cds	Potri.015G079700	gi|566206724|ref|XP_002322176.2|	1773	0	hypothetical protein POPTR_0015s09120g [Populus trichocarpa]	.	.	.	.	.	.	.	.	pfam02889	Sec63	Sec63 Brl domain. This domain (also known as the Brl domain) is required for assembly of functional endoplasmic reticulum translocons.	.	.	.	.	.
PB.10976	PuSMRT_PB.10976.1_transcript7343_f2p0_2319_g1,PuSMRT_PB.10976.2_transcript7890_f7p0_2237_g1	+	0,1^2-	Retained intron(RI)	gi|566206841|ref|XM_002321623.2|	2227	0	Populus trichocarpa hypothetical protein (POPTR_0015s09960g) mRNA, complete cds	Potri.015G088200	gi|566206842|ref|XP_002321659.2|	3093	0	hypothetical protein POPTR_0015s09960g [Populus trichocarpa]	Q9STL8	769	0	Probable Ufm1-specific protease	.	.	.	.	pfam07910	Peptidase_C78	Peptidase family C78. This family formerly known as DUF1671 has been shown to be a cysteine peptidase called (Ufm1)-specific protease.	.	.	GO:0071567|UFM1 hydrolase activity;	.	.
PB.10998	PuSMRT_PB.10998.2_transcript817_f2p0_4137_g1,PuSMRT_PB.10998.1_transcript1035_f11p0_3961_g1	-	0,1^2-	Retained intron(RI)	gi|566206942|ref|XM_002322207.2|	4034	0	Populus trichocarpa hypothetical protein (POPTR_0015s10620g) mRNA, complete cds	Potri.015G094100	gi|566206943|ref|XP_002322243.2|	6025	0	hypothetical protein POPTR_0015s10620g [Populus trichocarpa]	F6QV99	234	2e-66	ATPase family AAA domain-containing protein 1	YGR028w	232	4e-66	COG0464	pfam00004	AAA	ATPase family associated with various cellular activities (AAA). AAA family proteins often perform chaperone-like functions that assist in the assembly, operation, or disassembly of protein complexes.	GO:0031122|cytoplasmic microtubule organization;GO:0007612|learning;GO:0007613|memory;GO:0051967|negative regulation of synaptic transmission, glutamatergic;GO:0002092|positive regulation of receptor internalization;	GO:0030054|cell junction;GO:0005634|nucleus;GO:0005777|peroxisome;GO:0045211|postsynaptic membrane;	GO:0005524|ATP binding;GO:0016887|ATPase activity;GO:0008568|microtubule-severing ATPase activity;	.	.
PB.11028	PuSMRT_PB.11028.11_transcript3232_f5p0_3148_g1,PuSMRT_PB.11028.8_transcript2819_f27p0_3207_g1	-	1^,2^	Alternative 5' splice site(A5SS)	gi|224136315|ref|XM_002322263.1|	3104	0	Populus trichocarpa ATP-dependent clp protease ATP-binding subunit clpA family protein (POPTR_0015s11640g) mRNA, complete cds	Potri.015G105100	gi|743894019|ref|XP_011040255.1|	4449	0	PREDICTED: chaperone protein ClpC, chloroplastic [Populus euphratica]	P35100	1528	0	Chaperone protein ClpC, chloroplastic	alr2999	1196	0	COG0542	pfam07724	AAA_2	AAA domain (Cdc48 subfamily). This Pfam entry includes some of the AAA proteins not detected by the pfam00004 model.	GO:0019538|protein metabolic process;	GO:0009507|chloroplast;	GO:0005524|ATP binding;	.	.
PB.11031	PuSMRT_PB.11031.2_transcript1094_f3p0_3955_g1,PuSMRT_PB.11031.1_transcript1009_f8p0_4003_g1/PuSMRT_PB.11031.3_transcript2074_f3p0_3516_g1	+	0,1-2^	Skipped exon(SE)	gi|743894050|ref|XM_011041970.1|	3726	0	PREDICTED: Populus euphratica protein MEI2-like 1 (LOC105136570), transcript variant X1, mRNA	Potri.015G106000	gi|743894051|ref|XP_011040272.1|	4746	0	PREDICTED: protein MEI2-like 1 isoform X1 [Populus euphratica]	Q8W4I9	767	0	Protein MEI2-like 1	.	.	.	.	pfam04059	RRM_2	RNA recognition motif 2.	GO:0051321|meiotic cell cycle;GO:0006355|regulation of transcription, DNA-templated;GO:0006351|transcription, DNA-templated;	.	GO:0000166|nucleotide binding;GO:0003723|RNA binding;	.	.
PB.11062	PuSMRT_PB.11062.5_transcript17141_f4p0_1393_g1,PuSMRT_PB.11062.1_transcript16569_f3p0_1435_g1	-	1-,2-	Alternative 3' splice site(A3SS)	gi|566207746|ref|XM_002322339.2|	1486	0	Populus trichocarpa hypothetical protein (POPTR_0015s15370g) mRNA, complete cds	Potri.015G121600	gi|566207747|ref|XP_002322375.2|	1941	0	hypothetical protein POPTR_0015s15370g [Populus trichocarpa]	P42620	305	3e-97	Glutathionyl-hydroquinone reductase YqjG	BMEI0455	321	8e-104	COG0435	pfam13410	GST_C_2	Glutathione S-transferase, C-terminal domain. This domain is closely related to pfam00043.	.	.	GO:0016491|oxidoreductase activity;	K07393	ECM4; putative glutathione S-transferase
PB.11106	PuSMRT_PB.11106.1_transcript18253_f3p0_1326_g1,PuSMRT_PB.11106.2_transcript26567_f6p0_884_g1	+	0,1^2-	Retained intron(RI)	gi|566207413|ref|XM_002321862.2|	890	0	Populus trichocarpa hypothetical protein (POPTR_0015s13440g) mRNA, complete cds	Potri.015G140500	gi|224134755|ref|XP_002321898.1|	846	4e-111	hypothetical protein POPTR_0015s13440g [Populus trichocarpa]	.	.	.	.	.	.	.	.	pfam04979	IPP-2	Protein phosphatase inhibitor 2 (IPP-2). Protein phosphotase inhibitor 2 (IPP-2) is a phosphoprotein conserved among all eukaryotes, and it appears in both the nucleus and cytoplasm of tissue culture cells.	.	.	.	.	.
PB.11139	PuSMRT_PB.11139.2_transcript2857_f2p0_3281_g1,PuSMRT_PB.11139.1_transcript2471_f3p0_3381_g1	-	1-,2-	Alternative 3' splice site(A3SS)	.	.	.	.	.	.	.	.	.	.	.	.	.	.	.	.	.	.	.	.	.	.	.	.	.
PB.11145	PuSMRT_PB.11145.1_transcript14137_f3p0_1617_g1,PuSMRT_PB.11145.2_transcript16805_f2p0_1423_g1	-	1-,2-	Alternative 3' splice site(A3SS)	gi|743893694|ref|XM_011041786.1|	1452	0	PREDICTED: Populus euphratica myb family transcription factor APL-like (LOC105136439), transcript variant X1, mRNA	Potri.016G001100	gi|743893695|ref|XP_011040088.1|	1480	0	PREDICTED: myb family transcription factor APL-like isoform X1 [Populus euphratica]	Q9SJW0	318	8e-101	Myb family transcription factor PHL7	.	.	.	.	pfam14379	Myb_CC_LHEQLE	MYB-CC type transfactor, LHEQLE motif. This family is found towards the C-terminus of Myb-CC type transcription factors, and carries a highly conserved LHEQLE sequence motif.	GO:0006355|regulation of transcription, DNA-templated;GO:0006351|transcription, DNA-templated;	GO:0005634|nucleus;	GO:0003677|DNA binding;GO:0003700|transcription factor activity, sequence-specific DNA binding;	.	.
PB.11171	PuSMRT_PB.11171.2_transcript2935_f2p0_3236_g1,PuSMRT_PB.11171.1_transcript2722_f2p0_3307_g1	-	0,1^2-	Retained intron(RI)	.	.	.	.	.	.	.	.	.	.	.	.	.	.	.	.	.	.	.	.	.	.	.	.	.
PB.11182	PuSMRT_PB.11182.2_transcript7752_f2p0_2242_g1,PuSMRT_PB.11182.1_transcript8643_f2p0_2135_g1	+	0,1^2-	Retained intron(RI)	gi|566208152|ref|XM_002322502.2|	2034	0	Populus trichocarpa transcription initiation factor IIF alpha subunit family protein (POPTR_0016s01680g) mRNA, complete cds	Potri.016G015100	gi|566208153|ref|XP_002322538.2|	2120	0	transcription initiation factor IIF alpha subunit family protein [Populus trichocarpa]	Q9SU25	529	2e-177	Transcription initiation factor IIF subunit alpha	.	.	.	.	pfam05793	TFIIF_alpha	Transcription initiation factor IIF, alpha subunit (TFIIF-alpha). Transcription initiation factor IIF, alpha subunit (TFIIF-alpha) or RNA polymerase II-associating protein 74 (RAP74) is the large subunit of transcription factor IIF (TFIIF), which is essential for accurate initiation and stimulates elongation by RNA polymerase II.	GO:0032968|positive regulation of transcription elongation from RNA polymerase II promoter;GO:0006367|transcription initiation from RNA polymerase II promoter;	GO:0005634|nucleus;	GO:0003824|catalytic activity;GO:0003677|DNA binding;GO:0008022|protein C-terminus binding;	K03138	TFIIF1, GTF2F1, TFG1; transcription initiation factor TFIIF subunit alpha
PB.11194	PuSMRT_PB.11194.2_transcript529_f2p0_4474_g1,PuSMRT_PB.11194.1_transcript516_f40p0_4430_g1	+	1-,2-	Alternative 3' splice site(A3SS)	gi|743913453|ref|XM_011002337.1|	4088	0	PREDICTED: Populus euphratica myosin-9-like (LOC105108142), mRNA	Potri.016G018700	gi|743913454|ref|XP_011000639.1|	5428	0	PREDICTED: myosin-9-like [Populus euphratica]	.	.	.	.	.	.	.	.	pfam01576	Myosin_tail_1	Myosin tail. The myosin molecule is a multi-subunit complex made up of two heavy chains and four light chains it is a fundamental contractile protein found in all eukaryote cell types. This family consists of the coiled-coil myosin heavy chain tail region. The coiled-coil is composed of the tail from two molecules of myosin. These can then assemble into the macromolecular thick filament. The coil…	.	.	.	.	.
PB.11202	PuSMRT_PB.11202.1_transcript13912_f5p0_1631_g1,PuSMRT_PB.11202.2_transcript15438_f6p0_1514_g1	-	0,1^2-	Retained intron(RI)	gi|224139597|ref|XM_002323151.1|	1464	0	Populus trichocarpa hypothetical protein (POPTR_0016s02180g) mRNA, complete cds	Potri.016G021100	gi|224139598|ref|XP_002323187.1|	2490	0	hypothetical protein POPTR_0016s02180g [Populus trichocarpa]	F8WKW1	568	0	7-deoxyloganetin glucosyltransferase	.	.	.	.	pfam00201	UDPGT	UDP-glucoronosyl and UDP-glucosyl transferase.	GO:0008152|metabolic process;	.	GO:0035251|UDP-glucosyltransferase activity;	.	.
PB.11209	PuSMRT_PB.11209.1_transcript4056_f12p0_2903_g1,PuSMRT_PB.11209.2_transcript4919_f2p0_2738_g1	+	1-,2-	Alternative 3' splice site(A3SS)	gi|566208269|ref|XM_002322532.2|	3000	0	Populus trichocarpa hypothetical protein (POPTR_0016s02330g) mRNA, complete cds	Potri.016G023000	gi|566208270|ref|XP_002322568.2|	3982	0	hypothetical protein POPTR_0016s02330g [Populus trichocarpa]	Q0WQF4	1261	0	Vacuolar protein sorting-associated protein 53 A	.	.	.	.	pfam04100	Vps53_N	Vps53-like, N-terminal. Vps53 complexes with Vps52 and Vps54 to form a multi- subunit complex involved in regulating membrane trafficking events.	GO:0010286|heat acclimation;GO:0007009|plasma membrane organization;GO:0015031|protein transport;GO:0042147|retrograde transport, endosome to Golgi;	GO:0005829|cytosol;GO:0010008|endosome membrane;GO:0000938|GARP complex;GO:0000139|Golgi membrane;	.	.	.
PB.11221	PuSMRT_PB.11221.1_transcript6831_f6p0_2324_g1,PuSMRT_PB.11221.2_transcript7982_f4p0_2218_g1	+	1-,2-	Alternative 3' splice site(A3SS)	gi|566208325|ref|XM_002322548.2|	2058	0	Populus trichocarpa hypothetical protein (POPTR_0016s02620g) mRNA, complete cds	Potri.016G025500	gi|566208326|ref|XP_002322584.2|	3285	0	hypothetical protein POPTR_0016s02620g [Populus trichocarpa]	Q9SG80	946	0	Alpha-L-arabinofuranosidase 1	CAC3436	290	6e-84	COG3534	pfam06964	Alpha-L-AF_C	Alpha-L-arabinofuranosidase C-terminus. This family represents the C-terminus (approximately 200 residues) of bacterial and eukaryotic alpha-L-arabinofuranosidase (EC:3.2.1.55). This catalyses the hydrolysis of nonreducing terminal alpha-L-arabinofuranosidic linkages in L-arabinose-containing polysaccharides.	GO:0046373|L-arabinose metabolic process;GO:0045493|xylan catabolic process;	GO:0048046|apoplast;GO:0009505|plant-type cell wall;GO:0005578|proteinaceous extracellular matrix;GO:0005773|vacuole;	GO:0046556|alpha-L-arabinofuranosidase activity;GO:0009044|xylan 1,4-beta-xylosidase activity;	K01209	E3.2.1.55, abfA; alpha-N-arabinofuranosidase [EC:3.2.1.55]
PB.11225	PuSMRT_PB.11225.1_transcript1819_f2p0_3638_g1,PuSMRT_PB.11225.2_transcript1946_f2p0_3557_g1	-	1-,2-	Alternative 3' splice site(A3SS)	gi|566208367|ref|XM_002323172.2|	3777	0	Populus trichocarpa hypothetical protein (POPTR_0016s02870g) mRNA, complete cds	Potri.016G028900	gi|566208368|ref|XP_002323208.2|	5210	0	hypothetical protein POPTR_0016s02870g [Populus trichocarpa]	Q8RXD9	1481	0	4-alpha-glucanotransferase DPE2	L94405	420	2e-132	COG1640	pfam02446	Glyco_hydro_77	4-alpha-glucanotransferase. These enzymes EC:2.4.1.25 transfer a segment of a (1,4)-alpha-D-glucan to a new 4-position in an acceptor, which may be glucose or (1,4)-alpha-D-glucan.	GO:0000025|maltose catabolic process;GO:0000023|maltose metabolic process;GO:0005976|polysaccharide metabolic process;GO:0005983|starch catabolic process;	GO:0005829|cytosol;	GO:0004134|4-alpha-glucanotransferase activity;GO:0010297|heteropolysaccharide binding;GO:2001070|starch binding;	K00705	malQ; 4-alpha-glucanotransferase [EC:2.4.1.25]
PB.11234	PuSMRT_PB.11234.2_transcript27452_f17p0_841_g1/PuSMRT_PB.11234.3_transcript34536_f2p0_560_g1,PuSMRT_PB.11234.1_transcript24563_f2p0_993_g1	+	0,1-2^	Skipped exon(SE)	gi|566208402|ref|XM_006373623.1|	1066	0	Populus trichocarpa hypothetical protein (POPTR_0016s03070g) mRNA, complete cds	Potri.016G030900	gi|566208403|ref|XP_006373685.1|	1121	1e-150	hypothetical protein POPTR_0016s03070g [Populus trichocarpa]	Q0JNR2	251	2e-79	Cysteine proteinase inhibitor 12	.	.	.	.	pfam00031	Cystatin	Cystatin domain. Very diverse family. Attempts to define separate sub-families failed. Typically, either the N-terminal or C-terminal end is very divergent. But splitting into two domains would make very short families. pfam00666 are related to this family but have not been included.	GO:0006952|defense response;GO:2000117|negative regulation of cysteine-type endopeptidase activity;	GO:0005576|extracellular region;	GO:0004869|cysteine-type endopeptidase inhibitor activity;GO:0002020|protease binding;	.	.
PB.11249	PuSMRT_PB.11249.3_transcript12975_f2p0_1737_g1,PuSMRT_PB.11249.1_transcript3703_f6p0_2980_g1/PuSMRT_PB.11249.2_transcript10189_f2p0_1957_g1/PuSMRT_PB.11249.4_transcript15681_f2p0_1499_g1	+	1-,2-	Alternative 3' splice site(A3SS)	gi|743913024|ref|XM_011002109.1|	2679	0	PREDICTED: Populus euphratica CDPK-related kinase 7-like (LOC105107984), mRNA	Potri.016G035500	gi|224137674|ref|XP_002322616.1|	3001	0	CDPK-related kinase 1 family protein [Populus trichocarpa]	O80673	962	0	CDPK-related kinase 1	.	.	.	.	pfam00069	Pkinase	Protein kinase domain.	GO:0010286|heat acclimation;GO:0046777|protein autophosphorylation;	GO:0005886|plasma membrane;	GO:0005524|ATP binding;GO:0005516|calmodulin binding;GO:0004683|calmodulin-dependent protein kinase activity;GO:0046872|metal ion binding;	.	.
PB.1125	PuSMRT_PB.1125.2_transcript10180_f2p0_1973_g1,PuSMRT_PB.1125.1_transcript13804_f2p0_1655_g1	-	0,1^2-	Retained intron(RI)	gi|743903653|ref|XM_011046878.1|	1479	0	PREDICTED: Populus euphratica thymidylate kinase (LOC105140164), transcript variant X5, mRNA	Potri.001G334900	gi|743903650|ref|XP_011045178.1|	1114	8e-146	PREDICTED: thymidylate kinase isoform X3 [Populus euphratica]	Q0WW55	314	7e-101	Thymidylate kinase	SPCC70.07c	169	1e-47	COG0125	pfam02223	Thymidylate_kin	Thymidylate kinase.	GO:0006233|dTDP biosynthetic process;	GO:0005739|mitochondrion;GO:0005654|nucleoplasm;	GO:0005524|ATP binding;GO:0004798|thymidylate kinase activity;	K00943	tmk, DTYMK; dTMP kinase [EC:2.7.4.9]
PB.11251	PuSMRT_PB.11251.2_transcript14470_f2p0_1589_g1,PuSMRT_PB.11251.1_transcript15128_f3p0_1529_g1	+	1-,2-	Alternative 3' splice site(A3SS)	gi|566208481|ref|XM_002322582.2|	1578	0	Populus trichocarpa hypothetical protein (POPTR_0016s03490g) mRNA, complete cds	Potri.016G035700	gi|224137682|ref|XP_002322618.1|	1802	0	hypothetical protein POPTR_0016s03490g [Populus trichocarpa]	Q9UNI6	225	3e-66	Dual specificity protein phosphatase 12	YIR026c	166	8e-45	COG2453	pfam00782	DSPc	Dual specificity phosphatase, catalytic domain. Ser/Thr and Tyr protein phosphatases. The enzyme's tertiary fold is highly similar to that of tyrosine-specific phosphatases, except for a "recognition" region.	GO:0006464|cellular protein modification process;GO:0016311|dephosphorylation;GO:0033133|positive regulation of glucokinase activity;	GO:0005737|cytoplasm;GO:0005829|cytosol;GO:0005634|nucleus;	GO:0016791|phosphatase activity;GO:0004725|protein tyrosine phosphatase activity;GO:0008138|protein tyrosine/serine/threonine phosphatase activity;GO:0008270|zinc ion binding;	K14819	DUSP12, YVH1; dual specificity phosphatase 12 [EC:3.1.3.16 3.1.3.48]
PB.11258	PuSMRT_PB.11258.1_transcript134_f12p0_5462_g1/PuSMRT_PB.11258.2_transcript1264_f3p0_3858_g1/PuSMRT_PB.11258.3_transcript1639_f2p0_3698_g1/PuSMRT_PB.11258.4_transcript2036_f3p0_3536_g1/PuSMRT_PB.11258.5_transcript4467_f2p0_2838_g1/PuSMRT_PB.11258.6_transcript5566_f3p0_2681_g1,PuSMRT_PB.11258.7_transcript6795_f2p0_2428_g1	+	1-,2-	Alternative 3' splice site(A3SS)	gi|743913067|ref|XM_011002129.1|	5150	0	PREDICTED: Populus euphratica ferredoxin-dependent glutamate synthase, chloroplastic-like (LOC105108000), mRNA	Potri.016G036900	gi|743913068|ref|XP_011000431.1|	8521	0	PREDICTED: ferredoxin-dependent glutamate synthase, chloroplastic-like [Populus euphratica]	Q9ZNZ7	2811	0	Ferredoxin-dependent glutamate synthase 1, chloroplastic/mitochondrial	alr4344_2	1062	0	COG0069	pfam01645	Glu_synthase	Conserved region in glutamate synthase. This family represents a region of the glutamate synthase protein. This region is expressed as a separate subunit in the glutamate synthase alpha subunit from archaebacteria, or part of a large multidomain enzyme in other organisms. The aligned region of these proteins contains a putative FMN binding site and Fe-S cluster.	GO:0019676|ammonia assimilation cycle;GO:0008652|cellular amino acid biosynthetic process;GO:0006537|glutamate biosynthetic process;GO:0097054|L-glutamate biosynthetic process;GO:0009853|photorespiration;GO:0080114|positive regulation of glycine hydroxymethyltransferase activity;GO:0009416|response to light stimulus;GO:0009744|response to sucrose;	GO:0048046|apoplast;GO:0009507|chloroplast;GO:0009941|chloroplast envelope;GO:0009570|chloroplast stroma;GO:0016020|membrane;GO:0005759|mitochondrial matrix;GO:0005739|mitochondrion;	GO:0051538|3 iron, 4 sulfur cluster binding;GO:0016041|glutamate synthase (ferredoxin) activity;GO:0046872|metal ion binding;	K00284	E1.4.7.1; glutamate synthase (ferredoxin) [EC:1.4.7.1]
PB.11258	PuSMRT_PB.11258.1_transcript134_f12p0_5462_g1/PuSMRT_PB.11258.2_transcript1264_f3p0_3858_g1/PuSMRT_PB.11258.4_transcript2036_f3p0_3536_g1/PuSMRT_PB.11258.5_transcript4467_f2p0_2838_g1/PuSMRT_PB.11258.6_transcript5566_f3p0_2681_g1/PuSMRT_PB.11258.7_transcript6795_f2p0_2428_g1,PuSMRT_PB.11258.3_transcript1639_f2p0_3698_g1	+	1^,2^	Alternative 5' splice site(A5SS)	gi|743913067|ref|XM_011002129.1|	5150	0	PREDICTED: Populus euphratica ferredoxin-dependent glutamate synthase, chloroplastic-like (LOC105108000), mRNA	Potri.016G036900	gi|743913068|ref|XP_011000431.1|	8521	0	PREDICTED: ferredoxin-dependent glutamate synthase, chloroplastic-like [Populus euphratica]	Q9ZNZ7	2811	0	Ferredoxin-dependent glutamate synthase 1, chloroplastic/mitochondrial	alr4344_2	1062	0	COG0069	pfam01645	Glu_synthase	Conserved region in glutamate synthase. This family represents a region of the glutamate synthase protein. This region is expressed as a separate subunit in the glutamate synthase alpha subunit from archaebacteria, or part of a large multidomain enzyme in other organisms. The aligned region of these proteins contains a putative FMN binding site and Fe-S cluster.	GO:0019676|ammonia assimilation cycle;GO:0008652|cellular amino acid biosynthetic process;GO:0006537|glutamate biosynthetic process;GO:0097054|L-glutamate biosynthetic process;GO:0009853|photorespiration;GO:0080114|positive regulation of glycine hydroxymethyltransferase activity;GO:0009416|response to light stimulus;GO:0009744|response to sucrose;	GO:0048046|apoplast;GO:0009507|chloroplast;GO:0009941|chloroplast envelope;GO:0009570|chloroplast stroma;GO:0016020|membrane;GO:0005759|mitochondrial matrix;GO:0005739|mitochondrion;	GO:0051538|3 iron, 4 sulfur cluster binding;GO:0016041|glutamate synthase (ferredoxin) activity;GO:0046872|metal ion binding;	K00284	E1.4.7.1; glutamate synthase (ferredoxin) [EC:1.4.7.1]
PB.1128	PuSMRT_PB.1128.1_transcript13997_f3p0_1627_g1/PuSMRT_PB.1128.3_transcript15903_f3p0_1492_g1/PuSMRT_PB.1128.4_transcript10898_f3p0_1886_g1/PuSMRT_PB.1128.5_transcript11569_f100p0_1802_g1/PuSMRT_PB.1128.8_transcript13243_f16p0_1679_g1,PuSMRT_PB.1128.6_transcript12411_f5p0_1724_g1	-	0,1^2-	Retained intron(RI)	gi|566153082|ref|XM_002298561.2|	1537	0	Populus trichocarpa lysine and histidine specific transporter family protein (POPTR_0001s36330g) mRNA, complete cds	Potri.001G335300	gi|566153083|ref|XP_002298597.2|	2132	0	lysine and histidine specific transporter family protein [Populus trichocarpa]	Q9FKS8	733	0	Lysine histidine transporter 1	.	.	.	.	pfam01490	Aa_trans	Transmembrane amino acid transporter protein. This transmembrane region is found in many amino acid transporters including UNC-47 and MTR. UNC-47 encodes a vesicular amino butyric acid (GABA) transporter, (VGAT). UNC-47 is predicted to have 10 transmembrane domains. MTR is a N system amino acid transporter system protein involved in methyltryptophan resistance. Other members of this family includ…	GO:0043090|amino acid import;GO:0080167|response to karrikin;	GO:0016021|integral component of membrane;GO:0005886|plasma membrane;	GO:0015171|amino acid transmembrane transporter activity;GO:0015293|symporter activity;	.	.
PB.11283	PuSMRT_PB.11283.2_transcript21026_f2p0_1174_g1,PuSMRT_PB.11283.1_transcript18879_f2p0_1292_g1/PuSMRT_PB.11283.3_transcript21262_f3p0_1155_g1/PuSMRT_PB.11283.4_transcript29559_f3p0_749_g1/PuSMRT_PB.11283.5_transcript33122_f2p0_592_g1	+	1^,2^	Alternative 5' splice site(A5SS)	gi|566208673|ref|XM_002322630.2|	1293	0	Populus trichocarpa hypothetical protein (POPTR_0016s04520g) mRNA, complete cds	Potri.016G045900	gi|566208674|ref|XP_002322666.2|	1446	0	hypothetical protein POPTR_0016s04520g [Populus trichocarpa]	Q8S9M1	365	4e-122	Probable plastid-lipid-associated protein 13, chloroplastic	.	.	.	.	pfam04755	PAP_fibrillin	PAP_fibrillin. This family identifies a conserved region found in a number of plastid lipid-associated proteins (PAPs), and in a number of putative fibrillin proteins.	.	GO:0009507|chloroplast;GO:0009570|chloroplast stroma;GO:0009534|chloroplast thylakoid;GO:0010287|plastoglobule;GO:0009579|thylakoid;	.	.	.
PB.11284	PuSMRT_PB.11284.1_transcript14867_f10p0_1508_g1/PuSMRT_PB.11284.4_transcript18236_f2p0_1349_g1,PuSMRT_PB.11284.3_transcript16072_f3p0_1471_g1	-	0,1-2^	Skipped exon(SE)	gi|743869221|ref|XM_011034916.1|	1406	0	PREDICTED: Populus euphratica omega-6 fatty acid desaturase, endoplasmic reticulum isozyme 2 (LOC105131774), mRNA	Potri.016G046200	gi|743869222|ref|XP_011033218.1|	2079	0	PREDICTED: omega-6 fatty acid desaturase, endoplasmic reticulum isozyme 2 [Populus euphratica]	Q8GZC3	695	0	Delta(12)-fatty-acid desaturase FAD2	all1597	237	9e-72	COG3239	pfam00487	FA_desaturase	Fatty acid desaturase.	GO:0006636|unsaturated fatty acid biosynthetic process;	GO:0005789|endoplasmic reticulum membrane;GO:0016021|integral component of membrane;	GO:0016717|oxidoreductase activity, acting on paired donors, with oxidation of a pair of donors resulting in the reduction of molecular oxygen to two molecules of water;	.	.
PB.11303	PuSMRT_PB.11303.1_transcript3107_f3p0_3179_g1,PuSMRT_PB.11303.2_transcript4700_f6p0_2782_g1	+	0,1^2-	Retained intron(RI)	gi|566208853|ref|XM_002322674.2|	2169	0	Populus trichocarpa alkaline alpha galactosidase family protein (POPTR_0016s05500g) mRNA, complete cds	Potri.016G054700	gi|224138022|ref|XP_002322710.1|	3351	0	alkaline alpha galactosidase family protein [Populus trichocarpa]	Q94A08	1056	0	Probable galactinol--sucrose galactosyltransferase 2	.	.	.	.	pfam05691	Raffinose_syn	Raffinose synthase or seed imbibition protein Sip1. This family consists of several raffinose synthase proteins, also known as seed imbibition (Sip1) proteins. Raffinose (O-alpha- D-galactopyranosyl- (1-->6)- O-alpha- D-glucopyranosyl-(1<-->2)- O-beta- D-fructofuranoside) is a widespread oligosaccharide in plant seeds and other tissues. Raffinose synthase (EC:2.4.1.82) is the key enzyme that chan…	GO:0034484|raffinose catabolic process;GO:0080167|response to karrikin;GO:0006979|response to oxidative stress;	GO:0009506|plasmodesma;	GO:0052692|raffinose alpha-galactosidase activity;GO:0016757|transferase activity, transferring glycosyl groups;	K06617	E2.4.1.82; raffinose synthase [EC:2.4.1.82]
PB.11313	PuSMRT_PB.11313.1_transcript2003_f2p0_3539_g1/PuSMRT_PB.11313.2_transcript4731_f2p0_2779_g1/PuSMRT_PB.11313.3_transcript12003_f2p0_1835_g1/PuSMRT_PB.11313.5_transcript21049_f2p0_1173_g1,PuSMRT_PB.11313.4_transcript17389_f2p0_1379_g1	+	1-,2-	Alternative 3' splice site(A3SS)	gi|743869652|ref|XM_011035038.1|	3057	0	PREDICTED: Populus euphratica villin-3-like (LOC105131856), transcript variant X1, mRNA	Potri.016G056200	gi|743869653|ref|XP_011033340.1|	4422	0	PREDICTED: villin-3-like isoform X1 [Populus euphratica]	O81644	1265	0	Villin-2	.	.	.	.	pfam02209	VHP	Villin headpiece domain.	GO:0051017|actin filament bundle assembly;GO:0051693|actin filament capping;	GO:0005737|cytoplasm;GO:0005856|cytoskeleton;	.	.	.
PB.11326	PuSMRT_PB.11326.2_transcript2294_f2p0_3455_g1,PuSMRT_PB.11326.1_transcript7485_f2p0_2306_g1	-	0,1^2-	Retained intron(RI)	gi|743891902|ref|XM_011041183.1|	3107	0	PREDICTED: Populus euphratica kinesin-like protein FLA10 (LOC105136029), transcript variant X3, mRNA	Potri.016G060400	gi|566208956|ref|XP_006373794.1|	4897	0	hypothetical protein POPTR_0016s06040g [Populus trichocarpa]	F4J8L3	1280	0	Kinesin-like protein KIN-7K, chloroplastic	SPBC1604.20c	222	2e-60	COG5059	pfam00225	Kinesin	Kinesin motor domain.	GO:0007018|microtubule-based movement;	GO:0009507|chloroplast;GO:0005874|microtubule;	GO:0005524|ATP binding;GO:0003777|microtubule motor activity;	K11498	CENPE; centromeric protein E
PB.11327	PuSMRT_PB.11327.1_transcript3878_f2p0_2978_g1/PuSMRT_PB.11327.3_transcript4793_f4p0_2769_g1,PuSMRT_PB.11327.2_transcript3412_f2p0_3128_g1	-	1^,2^	Alternative 5' splice site(A5SS)	.	.	.	.	.	.	.	.	.	.	.	.	.	.	.	.	.	.	.	.	.	.	.	.	.
PB.11339	PuSMRT_PB.11339.3_transcript5540_f2p0_2622_g1,PuSMRT_PB.11339.1_transcript3297_f2p0_3135_g1	+	1^,2^	Alternative 5' splice site(A5SS)	gi|566209071|ref|XM_006373755.1|	2115	0	Populus trichocarpa hypothetical protein (POPTR_0016s06620g) mRNA, complete cds	Potri.016G065900	gi|566209072|ref|XP_006373817.1|	3511	0	hypothetical protein POPTR_0016s06620g [Populus trichocarpa]	Q93YS4	959	0	ABC transporter G family member 22	.	.	.	.	pfam00005	ABC_tran	ABC transporter. ABC transporters for a large family of proteins responsible for translocation of a variety of compounds across biological membranes. ABC transporters are the largest family of proteins in many completely sequenced bacteria. ABC transporters are composed of two copies of this domain and two copies of a transmembrane domain pfam00664. These four domains may belong to a single polyp…	GO:0009414|response to water deprivation;GO:0010148|transpiration;	GO:0016021|integral component of membrane;GO:0005886|plasma membrane;	GO:0005524|ATP binding;GO:0042626|ATPase activity, coupled to transmembrane movement of substances;	.	.
PB.11339	PuSMRT_PB.11339.4_transcript1838_f2p0_3622_g1,PuSMRT_PB.11339.1_transcript3297_f2p0_3135_g1/PuSMRT_PB.11339.2_transcript4935_f3p0_2742_g1/PuSMRT_PB.11339.3_transcript5540_f2p0_2622_g1	+	0,1^2-	Retained intron(RI)	gi|566209071|ref|XM_006373755.1|	2115	0	Populus trichocarpa hypothetical protein (POPTR_0016s06620g) mRNA, complete cds	Potri.016G065900	gi|566209072|ref|XP_006373817.1|	3511	0	hypothetical protein POPTR_0016s06620g [Populus trichocarpa]	Q93YS4	959	0	ABC transporter G family member 22	.	.	.	.	pfam00005	ABC_tran	ABC transporter. ABC transporters for a large family of proteins responsible for translocation of a variety of compounds across biological membranes. ABC transporters are the largest family of proteins in many completely sequenced bacteria. ABC transporters are composed of two copies of this domain and two copies of a transmembrane domain pfam00664. These four domains may belong to a single polyp…	GO:0009414|response to water deprivation;GO:0010148|transpiration;	GO:0016021|integral component of membrane;GO:0005886|plasma membrane;	GO:0005524|ATP binding;GO:0042626|ATPase activity, coupled to transmembrane movement of substances;	.	.
PB.11341	PuSMRT_PB.11341.2_transcript19187_f3p0_1278_g1,PuSMRT_PB.11341.1_transcript14371_f3p0_1599_g1	+	1-,2-	Alternative 3' splice site(A3SS)	gi|566209074|ref|XM_002322729.2|	1466	0	Populus trichocarpa sucrose-phosphatase family protein (POPTR_0016s06640g) mRNA, complete cds	Potri.016G066100	gi|566209075|ref|XP_002322765.2|	2305	0	sucrose-phosphatase family protein [Populus trichocarpa]	Q5IH14	644	0	Sucrose-phosphatase 1	all0376	154	2e-42	COG0561	pfam05116	S6PP	Sucrose-6F-phosphate phosphohydrolase. This family consists of Sucrose-6F-phosphate phosphohydrolase proteins found in plants and cyanobacteria. Sucrose-6(F)-phosphate phosphohydrolase catalyses the final step in the pathway of sucrose biosynthesis.	GO:0005986|sucrose biosynthetic process;	.	GO:0000287|magnesium ion binding;GO:0050307|sucrose-phosphate phosphatase activity;	.	.
PB.11408	PuSMRT_PB.11408.1_transcript21976_f12p0_1114_g1/PuSMRT_PB.11408.3_transcript23932_f13p0_1012_g1,PuSMRT_PB.11408.2_transcript23601_f2p0_1038_g1	+	1-,2-	Alternative 3' splice site(A3SS)	gi|566209379|ref|XM_002322815.2|	802	0	Populus trichocarpa ascorbate peroxidase family protein (POPTR_0016s08580g) mRNA, complete cds	Potri.016G084800	gi|224138586|ref|XP_002322851.1|	1195	6e-160	ascorbate peroxidase family protein [Populus trichocarpa]	Q1PER6	403	5e-137	L-ascorbate peroxidase 2, cytosolic	YKR066c	161	2e-43	COG0376	pfam00141	peroxidase	Peroxidase.	GO:0034599|cellular response to oxidative stress;GO:0042744|hydrogen peroxide catabolic process;GO:0006979|response to oxidative stress;GO:0000302|response to reactive oxygen species;	GO:0005829|cytosol;	GO:0004130|cytochrome-c peroxidase activity;GO:0020037|heme binding;GO:0016688|L-ascorbate peroxidase activity;GO:0046872|metal ion binding;	K00434	E1.11.1.11; L-ascorbate peroxidase [EC:1.11.1.11]
PB.1141	PuSMRT_PB.1141.1_transcript1123_f2p0_3935_g1,PuSMRT_PB.1141.2_transcript1251_f2p0_3856_g1	+	1-,2-	Alternative 3' splice site(A3SS)	gi|743903754|ref|XM_011046932.1|	3652	0	PREDICTED: Populus euphratica uncharacterized LOC105140193 (LOC105140193), transcript variant X2, mRNA	Potri.001G338000	gi|743903755|ref|XP_011045234.1|	5413	0	PREDICTED: uncharacterized protein LOC105140193 isoform X2 [Populus euphratica]	Q2H102	203	1e-51	GPI inositol-deacylase	.	.	.	.	pfam07819	PGAP1	PGAP1-like protein. The sequences found in this family are similar to PGAP1. This is an endoplasmic reticulum membrane protein with a catalytic serine containing motif that is conserved in a number of lipases. PGAP1 functions as a GPI inositol-deacylase; this deacylation is important for the efficient transport of GPI-anchored proteins from the endoplasmic reticulum to the Golgi body.	GO:0015031|protein transport;	GO:0005789|endoplasmic reticulum membrane;GO:0016021|integral component of membrane;	GO:0016788|hydrolase activity, acting on ester bonds;	.	.
PB.11428	PuSMRT_PB.11428.1_transcript291_f2p0_4941_g1,PuSMRT_PB.11428.2_transcript310_f3p0_4885_g1/PuSMRT_PB.11428.3_transcript421_f2p0_4665_g1	+	0,1-2^	Skipped exon(SE)	gi|566209462|ref|XM_002322846.2|	4149	0	Populus trichocarpa hypothetical protein (POPTR_0016s09210g) mRNA, complete cds	Potri.016G090800	gi|566209463|ref|XP_002322882.2|	6274	0	hypothetical protein POPTR_0016s09210g [Populus trichocarpa]	Q9S814	1347	0	Ethylene-insensitive protein 2	BMEI0569	194	8e-52	COG1914	pfam01566	Nramp	Natural resistance-associated macrophage protein. The natural resistance-associated macrophage protein (NRAMP) family consists of Nramp1, Nramp2, and yeast proteins Smf1 and Smf2. The NRAMP family is a novel family of functional related proteins defined by a conserved hydrophobic core of ten transmembrane domains. This family of membrane proteins are divalent cation transporters. Nramp1 is an int…	GO:0009926|auxin polar transport;GO:0009734|auxin-activated signaling pathway;GO:0051301|cell division;GO:0071281|cellular response to iron ion;GO:0009736|cytokinin-activated signaling pathway;GO:0052544|defense response by callose deposition in cell wall;GO:0042742|defense response to bacterium;GO:0050832|defense response to fungus;GO:0001736|establishment of planar polarity;GO:0009873|ethylene-…	GO:0005789|endoplasmic reticulum membrane;GO:0016021|integral component of membrane;GO:0005634|nucleus;	GO:0005215|transporter activity;	K14513	EIN2; ethylene-insensitive protein 2
PB.11455	PuSMRT_PB.11455.1_transcript26161_f8p0_895_g1,PuSMRT_PB.11455.2_transcript26316_f13p0_896_g1/PuSMRT_PB.11455.3_transcript28315_f8p0_786_g1	+	1-,2-	Alternative 3' splice site(A3SS)	gi|566209613|ref|XM_002322880.2|	901	0	Populus trichocarpa 40S ribosomal protein S7 (POPTR_0016s10560g) mRNA, complete cds	Potri.016G100400	gi|566165801|ref|XP_006384193.1|	993	8e-132	hypothetical protein POPTR_0004s09830g, partial [Populus trichocarpa]	Q9ZNS1	322	4e-108	40S ribosomal protein S7	.	.	.	.	pfam01251	Ribosomal_S7e	Ribosomal protein S7e.	GO:0006412|translation;	GO:0005840|ribosome;	GO:0003735|structural constituent of ribosome;	.	.
PB.11460	PuSMRT_PB.11460.3_transcript20140_f9p0_1185_g1/PuSMRT_PB.11460.5_transcript27153_f2p0_886_g1/PuSMRT_PB.11460.6_transcript30049_f2p0_729_g1,PuSMRT_PB.11460.4_transcript26471_f2p0_921_g1	-	1^,2^	Alternative 5' splice site(A5SS)	gi|566209592|ref|XM_006373849.1|	1132	0	Populus trichocarpa hypothetical protein (POPTR_0016s10390g) mRNA, complete cds	Potri.016G102100	gi|566209593|ref|XP_006373911.1|	1594	0	hypothetical protein POPTR_0016s10390g [Populus trichocarpa]	Q0PGJ6	426	4e-146	Aldo-keto reductase family 4 member C9	slr0942	213	2e-63	COG0656	pfam00248	Aldo_ket_red	Aldo/keto reductase family. This family includes a number of K+ ion channel beta chain regulatory domains - these are reported to have oxidoreductase activity.	GO:0055114|oxidation-reduction process;GO:0009409|response to cold;GO:0009651|response to salt stress;GO:0009636|response to toxic substance;GO:0009414|response to water deprivation;	GO:0009507|chloroplast;	GO:0008106|alcohol dehydrogenase (NADP+) activity;GO:0004033|aldo-keto reductase (NADP) activity;GO:0070401|NADP+ binding;GO:0016229|steroid dehydrogenase activity;	.	.
PB.1147	PuSMRT_PB.1147.2_transcript5793_f2p0_2595_g1,PuSMRT_PB.1147.1_transcript6806_f6p0_2406_g1	+	0,1^2-	Retained intron(RI)	gi|566153008|ref|XM_002298536.2|	2470	0	Populus trichocarpa hypothetical protein (POPTR_0001s35880g) mRNA, complete cds	Potri.001G340300	gi|566153009|ref|XP_002298572.2|	3833	0	hypothetical protein POPTR_0001s35880g [Populus trichocarpa]	Q9SS87	719	0	Protein SIEVE ELEMENT OCCLUSION B	.	.	.	.	pfam14576	SEO_N	Sieve element occlusion N-terminus. Sieve element occlusion (SEO) proteins, or forisomes, are phloem proteins which accumulate during sieve element differentiation. This domain represents the N-terminus of SEO proteins.	GO:0010088|phloem development;	.	GO:0042803|protein homodimerization activity;GO:0043621|protein self-association;	.	.
PB.11473	PuSMRT_PB.11473.3_transcript14496_f2p0_1602_g1,PuSMRT_PB.11473.1_transcript14641_f7p0_1557_g1/PuSMRT_PB.11473.2_transcript16807_f12p0_1389_g1/PuSMRT_PB.11473.4_transcript12844_f4p0_1664_g1	+	0,1^2-	Retained intron(RI)	gi|566209776|ref|XM_002322910.2|	1708	0	Populus trichocarpa Chain D family protein (POPTR_0016s11610g) mRNA, complete cds	Potri.016G106900	gi|224138966|ref|XP_002322946.1|	1939	0	Chain D family protein [Populus trichocarpa]	P46275	632	0	Fructose-1,6-bisphosphatase, chloroplastic	VC2544	286	2e-89	COG0158	pfam00316	FBPase	Fructose-1-6-bisphosphatase.	GO:0006001|fructose catabolic process;GO:0019253|reductive pentose-phosphate cycle;	GO:0009570|chloroplast stroma;	GO:0042132|fructose 1,6-bisphosphate 1-phosphatase activity;GO:0046872|metal ion binding;	.	.
PB.11486	PuSMRT_PB.11486.2_transcript3212_f3p0_3176_g1,PuSMRT_PB.11486.1_transcript3214_f2p0_3193_g1	+	1-,2-	Alternative 3' splice site(A3SS)	gi|566209801|ref|XM_002322921.2|	3180	0	Populus trichocarpa hypothetical protein (POPTR_0016s11820g) mRNA, complete cds	Potri.016G110800	gi|566209802|ref|XP_002322957.2|	3294	0	hypothetical protein POPTR_0016s11820g [Populus trichocarpa]	F4IYM4	920	0	Protein DEFECTIVE IN EXINE FORMATION 1	.	.	.	.	pfam13517	VCBS	Repeat domain in Vibrio, Colwellia, Bradyrhizobium and Shewanella. This domain of about 100 residues is found in multiple (up to 35) copies in long proteins from several species of Vibrio, Colwellia, Bradyrhizobium, and Shewanella (hence the name VCBS) and in smaller copy numbers in proteins from several other bacteria. The large protein size and repeat copy numbers, species distribution, and sug…	GO:0071555|cell wall organization;GO:0010584|pollen exine formation;GO:0010208|pollen wall assembly;	GO:0005783|endoplasmic reticulum;GO:0016021|integral component of membrane;GO:0016020|membrane;GO:0005886|plasma membrane;	GO:0005509|calcium ion binding;	.	.
PB.1149	PuSMRT_PB.1149.1_transcript5622_f2p0_2607_g1,PuSMRT_PB.1149.2_transcript6193_f54p0_2481_g1	-	0,1^2-	Retained intron(RI)	gi|566153002|ref|XM_006369883.1|	2291	0	Populus trichocarpa hypothetical protein (POPTR_0001s35850g) mRNA, complete cds	Potri.001G340600	gi|566153003|ref|XP_006369945.1|	3884	0	hypothetical protein POPTR_0001s35850g [Populus trichocarpa]	Q9SS87	745	0	Protein SIEVE ELEMENT OCCLUSION B	.	.	.	.	pfam14576	SEO_N	Sieve element occlusion N-terminus. Sieve element occlusion (SEO) proteins, or forisomes, are phloem proteins which accumulate during sieve element differentiation. This domain represents the N-terminus of SEO proteins.	GO:0010088|phloem development;	.	GO:0042803|protein homodimerization activity;GO:0043621|protein self-association;	.	.
PB.11505	PuSMRT_PB.11505.3_transcript26055_f3p0_912_g1,PuSMRT_PB.11505.2_transcript26007_f6p0_911_g1	+	1^,2^	Alternative 5' splice site(A5SS)	gi|566209890|ref|XM_002322941.2|	858	0	Populus trichocarpa CPRD49 family protein (POPTR_0016s12310g) mRNA, complete cds	Potri.016G116000	gi|743940516|ref|XP_011014736.1|	1223	5e-167	PREDICTED: GDSL esterase/lipase CPRD49-like [Populus euphratica]	Q9SRM5	305	5e-101	GDSL esterase/lipase CPRD49	YOR126c	95.9	3e-22	COG2755	pfam00657	Lipase_GDSL	GDSL-like Lipase/Acylhydrolase.	GO:0016042|lipid catabolic process;	GO:0048046|apoplast;	GO:0016787|hydrolase activity;	.	.
PB.11505	PuSMRT_PB.11505.4_transcript22145_f2p0_1103_g1,PuSMRT_PB.11505.1_transcript21577_f8p0_1123_g1	+	1^,2^	Alternative 5' splice site(A5SS)	gi|743924848|ref|XM_011008251.1|	1009	0	PREDICTED: Populus euphratica GDSL esterase/lipase CPRD49-like (LOC105112528), transcript variant X1, mRNA	Potri.016G116100	gi|743924849|ref|XP_011006553.1|	1340	0	PREDICTED: GDSL esterase/lipase CPRD49-like isoform X1 [Populus euphratica]	Q9SRM5	338	1e-113	GDSL esterase/lipase CPRD49	YOR126c	98.2	7e-23	COG2755	pfam00657	Lipase_GDSL	GDSL-like Lipase/Acylhydrolase.	GO:0016042|lipid catabolic process;	GO:0048046|apoplast;	GO:0016787|hydrolase activity;	.	.
PB.11555	PuSMRT_PB.11555.3_transcript25462_f5p0_939_g1,PuSMRT_PB.11555.1_transcript26222_f3p0_902_g1	-	0,1^2-	Retained intron(RI)	gi|743866808|ref|XR_843408.1|	780	0	PREDICTED: Populus euphratica uncharacterized LOC105131343 (LOC105131343), ncRNA	Potri.016G130500	gi|566210177|ref|XP_002323041.2|	1068	1e-143	hypothetical protein POPTR_0016s13840g [Populus trichocarpa]	Q9LZX1	218	3e-67	Protein LURP-one-related 15	.	.	.	.	pfam04525	Tub_2	Tubby C 2. The structure of this family has been solved. It comprises a 12-stranded beta barrel with a central C-terminal alpha helix. This helix is thought to be a transmembrane helix. It is structurally similar to the C-terminal domain of the Tubby protein. In plants it plays a role in defense against pathogens.	GO:0006952|defense response;	GO:0009507|chloroplast;	.	.	.
PB.11596	PuSMRT_PB.11596.1_transcript7822_f5p0_2246_g1,PuSMRT_PB.11596.4_transcript9262_f2p0_2060_g1	-	0,1^2-	Retained intron(RI)	gi|566210360|ref|XM_002323660.2|	2143	0	Populus trichocarpa phosphoglycerate mutase family protein (POPTR_0016s14950g) mRNA, complete cds	Potri.016G142900	gi|224140653|ref|XP_002323696.1|	2804	0	phosphoglycerate mutase family protein [Populus trichocarpa]	P35493	999	0	2,3-bisphosphoglycerate-independent phosphoglycerate mutase	MA4007	288	1e-86	COG0696	pfam01676	Metalloenzyme	Metalloenzyme superfamily. This family includes phosphopentomutase and 2,3-bisphosphoglycerate-independent phosphoglycerate mutase. This family is also related to pfam00245. The alignment contains the most conserved residues that are probably involved in metal binding and catalysis.	GO:0006007|glucose catabolic process;GO:0006096|glycolytic process;	GO:0005737|cytoplasm;	GO:0030145|manganese ion binding;GO:0004619|phosphoglycerate mutase activity;	.	.
PB.1160	PuSMRT_PB.1160.4_transcript16130_f2p0_1465_g1,PuSMRT_PB.1160.1_transcript14380_f3p0_1599_g1/PuSMRT_PB.1160.2_transcript12273_f2p0_1765_g1	+	0,1^2-	Retained intron(RI)	gi|566152972|ref|XM_002300026.2|	968	0	Populus trichocarpa hypothetical protein (POPTR_0001s35620g) mRNA, complete cds	Potri.001G342600	gi|224060151|ref|XP_002300062.1|	1098	0	hypothetical protein POPTR_0001s35620g [Populus trichocarpa]	Q9LY84	312	2e-160	GDSL esterase/lipase At5g14450	.	.	.	.	pfam00657	Lipase_GDSL	GDSL-like Lipase/Acylhydrolase.	GO:0016042|lipid catabolic process;	GO:0005576|extracellular region;GO:0009505|plant-type cell wall;GO:0009506|plasmodesma;	GO:0016788|hydrolase activity, acting on ester bonds;	.	.
PB.11602	PuSMRT_PB.11602.2_transcript7312_f3p0_2326_g1/PuSMRT_PB.11602.3_transcript14565_f5p0_1569_g1/PuSMRT_PB.11602.8_transcript8966_f2p0_2097_g1,PuSMRT_PB.11602.4_transcript17838_f3p0_1365_g1	-	1^,2^	Alternative 5' splice site(A5SS)	.	.	.	.	.	.	.	.	.	.	.	.	.	.	.	.	.	.	.	.	.	.	.	.	.
PB.11614	PuSMRT_PB.11614.1_transcript11105_f2p0_1890_g1,PuSMRT_PB.11614.2_transcript11647_f3p0_1835_g1	-	1^,2^	Alternative 5' splice site(A5SS)	gi|566211253|ref|XM_002323676.2|	1945	0	Populus trichocarpa hypothetical protein (POPTR_0017s04020g) mRNA, complete cds	Potri.017G007400	gi|566211254|ref|XP_002323712.2|	1428	0	hypothetical protein POPTR_0017s04020g [Populus trichocarpa]	O80567	307	5e-94	La-related protein 6B	.	.	.	.	pfam05383	La	La domain. This presumed domain is found at the N-terminus of La RNA-binding proteins as well as other proteins. The function of this region is uncertain.	GO:0006355|regulation of transcription, DNA-templated;GO:0006396|RNA processing;GO:0006351|transcription, DNA-templated;	GO:0030529|ribonucleoprotein complex;GO:0005634|nucleus;	GO:0000166|nucleotide binding;GO:0003723|RNA binding;	K15191	LARP7; La-related protein 7
PB.11625	PuSMRT_PB.11625.1_transcript10827_f4p0_1890_g1,PuSMRT_PB.11625.2_transcript13414_f7p0_1671_g1/PuSMRT_PB.11625.3_transcript20633_f2p0_1186_g1	+	0,1^2-	Retained intron(RI)	gi|566211371|ref|XM_006372676.1|	877	0	Populus trichocarpa aminotransferase-related family protein (POPTR_0017s04600g) mRNA, complete cds	Potri.017G014200	gi|566211372|ref|XP_006372738.1|	1571	0	aminotransferase-related family protein [Populus trichocarpa]	Q9LVY1	375	5e-122	Tyrosine aminotransferase	ML2502	129	2e-31	COG0436	pfam00155	Aminotran_1_2	Aminotransferase class I and II.	GO:0009058|biosynthetic process;GO:0006520|cellular amino acid metabolic process;GO:0006559|L-phenylalanine catabolic process;	GO:0005829|cytosol;	GO:0080130|L-phenylalanine:2-oxoglutarate aminotransferase activity;GO:0004838|L-tyrosine:2-oxoglutarate aminotransferase activity;GO:0030170|pyridoxal phosphate binding;	K00815	TAT; tyrosine aminotransferase [EC:2.6.1.5]
PB.11648	PuSMRT_PB.11648.2_transcript2694_f2p0_3339_g1,PuSMRT_PB.11648.1_transcript2373_f2p0_3470_g1	+	1-,2-	Alternative 3' splice site(A3SS)	gi|566211557|ref|XM_006372769.1|	3205	0	Populus trichocarpa hypothetical protein (POPTR_0017s05480g) mRNA, complete cds	Potri.017G026200	gi|566211558|ref|XP_006372831.1|	3478	0	hypothetical protein POPTR_0017s05480g [Populus trichocarpa]	.	.	.	.	.	.	.	.	pfam06075	DUF936	Plant protein of unknown function (DUF936). This family consists of several hypothetical proteins from Arabidopsis thaliana and Oryza sativa. The function of this family is unknown.	.	.	.	.	.
PB.11661	PuSMRT_PB.11661.1_transcript7937_f3p0_2313_g1/PuSMRT_PB.11661.4_transcript10877_f2p0_1891_g1,PuSMRT_PB.11661.2_transcript9122_f2p0_2077_g1	-	1-,2-	Alternative 3' splice site(A3SS)	gi|566211679|ref|XM_006372830.1|	1494	0	Populus trichocarpa hypothetical protein (POPTR_0017s06050g) mRNA, complete cds	Potri.017G032000	gi|566211680|ref|XP_006372892.1|	2352	0	hypothetical protein POPTR_0017s06050g [Populus trichocarpa]	Q84RR0	710	0	Probable E3 ubiquitin-protein ligase ARI7	.	.	.	.	pfam01485	IBR	IBR domain. The IBR (In Between Ring fingers) domain is often found to occur between pairs of ring fingers (pfam00097). This domain has also been called the C6HC domain and DRIL (for double RING finger linked) domain. Proteins that contain two Ring fingers and an IBR domain (these proteins are also termed RBR family proteins) are thought to exist in all eukaryotic organisms. RBR family members pl…	GO:0032436|positive regulation of proteasomal ubiquitin-dependent protein catabolic process;GO:0000209|protein polyubiquitination;GO:0042787|protein ubiquitination involved in ubiquitin-dependent protein catabolic process;	GO:0005737|cytoplasm;GO:0000151|ubiquitin ligase complex;	GO:0016874|ligase activity;GO:0031624|ubiquitin conjugating enzyme binding;GO:0061630|ubiquitin protein ligase activity;GO:0008270|zinc ion binding;	K11968	ARIH1; ariadne-1 [EC:2.3.2.27]
PB.11671	PuSMRT_PB.11671.1_transcript14998_f2p0_1552_g1,PuSMRT_PB.11671.2_transcript15731_f5p0_1492_g1	-	0,1^2-	Retained intron(RI)	gi|566211787|ref|XM_006372884.1|	1318	0	Populus trichocarpa UBIQUITIN 11 family protein (POPTR_0017s06450g) mRNA, complete cds	Potri.017G036800	gi|823134063|ref|XP_012466865.1|	1956	0	PREDICTED: polyubiquitin-like [Gossypium raimondii]	P69322	753	0	Polyubiquitin	YLL039c	740	0	COG5272	pfam05691	Raffinose_syn	Raffinose synthase or seed imbibition protein Sip1. This family consists of several raffinose synthase proteins, also known as seed imbibition (Sip1) proteins. Raffinose (O-alpha- D-galactopyranosyl- (1-->6)- O-alpha- D-glucopyranosyl-(1<-->2)- O-beta- D-fructofuranoside) is a widespread oligosaccharide in plant seeds and other tissues. Raffinose synthase (EC:2.4.1.82) is the key enzyme that chan…	.	GO:0005737|cytoplasm;GO:0005634|nucleus;	.	.	.
PB.11671	PuSMRT_PB.11671.5_transcript16937_f16p0_1405_g1,PuSMRT_PB.11671.6_transcript17519_f35p0_1347_g1	-	0,1^2-	Retained intron(RI)	gi|566211787|ref|XM_006372884.1|	1318	0	Populus trichocarpa UBIQUITIN 11 family protein (POPTR_0017s06450g) mRNA, complete cds	Potri.017G036800	gi|823134063|ref|XP_012466865.1|	1956	0	PREDICTED: polyubiquitin-like [Gossypium raimondii]	P69322	753	0	Polyubiquitin	YLL039c	740	0	COG5272	pfam05691	Raffinose_syn	Raffinose synthase or seed imbibition protein Sip1. This family consists of several raffinose synthase proteins, also known as seed imbibition (Sip1) proteins. Raffinose (O-alpha- D-galactopyranosyl- (1-->6)- O-alpha- D-glucopyranosyl-(1<-->2)- O-beta- D-fructofuranoside) is a widespread oligosaccharide in plant seeds and other tissues. Raffinose synthase (EC:2.4.1.82) is the key enzyme that chan…	.	GO:0005737|cytoplasm;GO:0005634|nucleus;	.	.	.
PB.11673	PuSMRT_PB.11673.1_transcript18736_f2p0_1297_g1,PuSMRT_PB.11673.2_transcript19744_f3p0_1240_g1	+	0,1^2-	Retained intron(RI)	gi|566211807|ref|XM_006372894.1|	1297	0	Populus trichocarpa hypothetical protein (POPTR_0017s06550g) mRNA, complete cds	Potri.017G037900	gi|566211808|ref|XP_006372956.1|	1550	0	hypothetical protein POPTR_0017s06550g [Populus trichocarpa]	O23044	397	2e-134	Peroxidase 3	.	.	.	.	pfam00141	peroxidase	Peroxidase.	GO:0042744|hydrogen peroxide catabolic process;GO:0042538|hyperosmotic salinity response;GO:0009664|plant-type cell wall organization;GO:0009409|response to cold;GO:0009269|response to desiccation;GO:0006979|response to oxidative stress;	GO:0005783|endoplasmic reticulum;GO:0005576|extracellular region;GO:0009505|plant-type cell wall;	GO:0020037|heme binding;GO:0046872|metal ion binding;GO:0004601|peroxidase activity;	K00430	E1.11.1.7; peroxidase [EC:1.11.1.7]
PB.11735	PuSMRT_PB.11735.1_transcript3294_f2p0_3169_g1/PuSMRT_PB.11735.2_transcript3305_f3p0_3128_g1/PuSMRT_PB.11735.3_transcript11091_f2p0_1884_g1,PuSMRT_PB.11735.5_transcript8500_f2p0_2148_g1	-	1^,2^	Alternative 5' splice site(A5SS)	gi|566212184|ref|XM_006373013.1|	3098	0	Populus trichocarpa beta-galactosidase family protein (POPTR_0017s08470g) mRNA, complete cds	Potri.017G057900	gi|566212185|ref|XP_006373075.1|	4814	0	beta-galactosidase family protein [Populus trichocarpa]	Q9SCV3	1352	0	Beta-galactosidase 9	XF0840	156	9e-39	COG1874	pfam01301	Glyco_hydro_35	Glycosyl hydrolases family 35.	GO:0005975|carbohydrate metabolic process;	GO:0048046|apoplast;GO:0009505|plant-type cell wall;GO:0005774|vacuolar membrane;GO:0005773|vacuole;	GO:0004565|beta-galactosidase activity;GO:0030246|carbohydrate binding;	.	.
PB.11755	PuSMRT_PB.11755.2_transcript9725_f4p0_1966_g1/PuSMRT_PB.11755.3_transcript23618_f2p0_1036_g1,PuSMRT_PB.11755.1_transcript12101_f2p0_1784_g1	+	0,1^2-	Retained intron(RI)	gi|566212560|ref|XM_006373201.1|	2110	0	Populus trichocarpa hypothetical protein (POPTR_0017s10180g) mRNA, complete cds	Potri.017G066500	gi|566212561|ref|XP_006373263.1|	2677	0	hypothetical protein POPTR_0017s10180g [Populus trichocarpa]	B7ZUF3	103	2e-21	Histone-lysine N-methyltransferase setd3	.	.	.	.	pfam09273	Rubis-subs-bind	Rubisco LSMT substrate-binding. Members of this family adopt a multihelical structure, with an irregular array of long and short alpha-helices. They allow binding of the protein to substrate, such as the N-terminal tails of histones H3 and H4 and the large subunit of the Rubisco holoenzyme complex.	GO:0010452|histone H3-K36 methylation;GO:0051568|histone H3-K4 methylation;GO:0018027|peptidyl-lysine dimethylation;GO:0018026|peptidyl-lysine monomethylation;GO:0018023|peptidyl-lysine trimethylation;GO:0045944|positive regulation of transcription from RNA polymerase II promoter;GO:0045893|positive regulation of transcription, DNA-templated;GO:0006351|transcription, DNA-templated;	GO:0000790|nuclear chromatin;	GO:0046975|histone methyltransferase activity (H3-K36 specific);GO:0042800|histone methyltransferase activity (H3-K4 specific);GO:0003713|transcription coactivator activity;	K19199	SETD3; histone-lysine N-methyltransferase SETD3 [EC:2.1.1.43]
PB.11781	PuSMRT_PB.11781.1_transcript12242_f2p0_1785_g1,PuSMRT_PB.11781.2_transcript11655_f4p0_1807_g1	+	1^,2^	Alternative 5' splice site(A5SS)	gi|224140900|ref|XM_002323780.1|	1766	0	Populus trichocarpa hypothetical protein (POPTR_0017s11120g) mRNA, complete cds	Potri.017G074800	gi|224140901|ref|XP_002323816.1|	2300	0	hypothetical protein POPTR_0017s11120g [Populus trichocarpa]	.	.	.	.	.	.	.	.	pfam07059	DUF1336	Protein of unknown function (DUF1336). This family represents the C-terminus (approximately 250 residues) of a number of hypothetical plant proteins of unknown function.	.	.	.	.	.
PB.11785	PuSMRT_PB.11785.2_transcript8024_f2p0_2238_g1,PuSMRT_PB.11785.3_transcript7911_f3p0_2234_g1	-	1^,2^	Alternative 5' splice site(A5SS)	.	.	.	.	.	.	.	.	.	.	.	.	.	.	.	.	.	.	.	.	.	.	.	.	.
PB.11823	PuSMRT_PB.11823.6_transcript19789_f2p0_1237_g1,PuSMRT_PB.11823.7_transcript34708_f3p0_546_g1	+	0,1^2-	Retained intron(RI)	gi|566212888|ref|XM_006373271.1|	1972	0	Populus trichocarpa hypothetical protein (POPTR_0017s12240g) mRNA, complete cds	Potri.017G086500	gi|566212889|ref|XP_006373333.1|	2573	0	hypothetical protein POPTR_0017s12240g [Populus trichocarpa]	P55217	721	0	Cystathionine gamma-synthase 1, chloroplastic	BH1736	310	2e-97	COG0626	pfam01053	Cys_Met_Meta_PP	Cys/Met metabolizm PLP-dependent enzyme. This family includes enzymes involved in cysteine and methionine metabolizm. The following are members: Cystathionine gamma-lyase, Cystathionine gamma-synthase, Cystathionine beta-lyase, Methionine gamma-lyase, OAH/OAS sulfhydrylase, O-succinylhomoserine sulfhydrylase All of these members participate is slightly different reactions. All these enzymes use P…	GO:0071266|'de novo' L-methionine biosynthetic process;GO:0019343|cysteine biosynthetic process via cystathionine;GO:0009086|methionine biosynthetic process;GO:0001887|selenium compound metabolic process;GO:0019346|transsulfuration;	GO:0009507|chloroplast;GO:0009570|chloroplast stroma;	GO:0003962|cystathionine gamma-synthase activity;GO:0030170|pyridoxal phosphate binding;	K01739	metB; cystathionine gamma-synthase [EC:2.5.1.48]
PB.11832	PuSMRT_PB.11832.2_transcript1833_f2p0_3602_g1,PuSMRT_PB.11832.1_transcript2129_f4p0_3489_g1/PuSMRT_PB.11832.4_transcript4441_f2p0_2955_g1/PuSMRT_PB.11832.5_transcript7535_f2p0_2291_g1	-	0,1^2-	Retained intron(RI)	gi|566212948|ref|XM_002324053.2|	2477	0	Populus trichocarpa U-box domain-containing family protein (POPTR_0017s12530g) mRNA, complete cds	Potri.017G089600	gi|224141459|ref|XP_002324089.1|	5390	0	U-box domain-containing family protein [Populus trichocarpa]	Q9LF41	1538	0	Probable ubiquitin conjugation factor E4	SPAC20H4.10	348	6e-101	COG5113	pfam10408	Ufd2P_core	Ubiquitin elongating factor core. This is the most conserved part of the core region of Ufd2P ubiquitin elongating factor or E4, running from helix alpha-11 to alpha-38. It consists of 31 helices of variable length connected by loops of variable size forming a compact unit; the helical packing pattern of the compact unit consists of five structural repeats that resemble tandem Armadillo (ARM) rep…	GO:0006511|ubiquitin-dependent protein catabolic process;	GO:0005829|cytosol;GO:0005634|nucleus;GO:0000151|ubiquitin ligase complex;	GO:0016874|ligase activity;GO:0034450|ubiquitin-ubiquitin ligase activity;	K10597	UBE4B, UFD2; ubiquitin conjugation factor E4 B [EC:2.3.2.27]
PB.1190	PuSMRT_PB.1190.1_transcript3808_f7p0_2996_g1/PuSMRT_PB.1190.4_transcript9955_f3p0_1981_g1,PuSMRT_PB.1190.2_transcript4339_f2p0_2912_g1/PuSMRT_PB.1190.3_transcript10793_f2p0_1897_g1	+	0,1^2-	Retained intron(RI)	gi|743907745|ref|XM_011049004.1|	3009	0	PREDICTED: Populus euphratica serine/threonine-protein kinase BLUS1 (LOC105141697), transcript variant X1, mRNA	Potri.001G349300	gi|224060055|ref|XP_002300034.1|	3752	0	hypothetical protein POPTR_0001s34910g [Populus trichocarpa]	Q551H4	381	1e-112	Serine/threonine-protein kinase fray2	.	.	.	.	pfam00069	Pkinase	Protein kinase domain.	.	GO:0005737|cytoplasm;	GO:0005524|ATP binding;GO:0046872|metal ion binding;GO:0004702|receptor signaling protein serine/threonine kinase activity;	K08835	OXSR1, STK39; serine/threonine-protein kinase OSR1/STK39 [EC:2.7.11.1]
PB.11907	PuSMRT_PB.11907.2_transcript13283_f2p0_1683_g1,PuSMRT_PB.11907.3_transcript21565_f156p0_1116_g1/PuSMRT_PB.11907.4_transcript26332_f2p0_898_g1	-	0,1^2-	Retained intron(RI)	gi|566213235|ref|XM_006373384.1|	1230	0	Populus trichocarpa 14-3-3 family protein (POPTR_0017s13840g) mRNA, complete cds	Potri.017G113300	gi|566213236|ref|XP_006373446.1|	1374	0	14-3-3 family protein [Populus trichocarpa]	Q9SP07	484	4e-170	14-3-3-like protein	SPAC8E11.02c	368	5e-125	COG5040	pfam00244	41701	14-3-3 protein.	GO:0009649|entrainment of circadian clock;GO:0018298|protein-chromophore linkage;GO:0009411|response to UV;GO:0010224|response to UV-B;	GO:0000785|chromatin;GO:0005829|cytosol;GO:0005634|nucleus;	GO:0003682|chromatin binding;GO:0005085|guanyl-nucleotide exchange factor activity;GO:0009881|photoreceptor activity;GO:0042803|protein homodimerization activity;	.	.
PB.11910	PuSMRT_PB.11910.4_transcript16258_f2p0_1468_g1,PuSMRT_PB.11910.5_transcript15257_f2p0_1536_g1	-	0,1-2^	Skipped exon(SE)	gi|566171628|ref|XM_006383403.1|	1011	0	Populus trichocarpa hypothetical protein (POPTR_0005s15740g) mRNA, complete cds	Potri.017G114000	gi|743875852|ref|XP_011035051.1|	906	2e-148	PREDICTED: ubiquitin receptor RAD23d-like isoform X3 [Populus euphratica]	Q84L30	189	4e-95	Ubiquitin receptor RAD23d	SPBC2D10.12	90.9	5e-19	COG5272	pfam00240	ubiquitin	Ubiquitin family. This family contains a number of ubiquitin-like proteins: SUMO (smt3 homologue) Nedd8, Elongin B, Rub1, and Parkin. A number of them are thought to carry a distinctive five-residue motif termed the proteasome-interacting motif (PIM), which may have a biologically significant role in protein delivery to proteasomes and recruitment of proteasomes to transcription sites.	GO:0006289|nucleotide-excision repair;GO:0043161|proteasome-mediated ubiquitin-dependent protein catabolic process;GO:0009409|response to cold;	GO:0005737|cytoplasm;GO:0005829|cytosol;GO:0005634|nucleus;	GO:0003684|damaged DNA binding;GO:0031593|polyubiquitin binding;GO:0070628|proteasome binding;GO:0043130|ubiquitin binding;	K10839	RAD23, HR23; UV excision repair protein RAD23
PB.12013	PuSMRT_PB.12013.2_transcript10157_f4p0_1959_g1,PuSMRT_PB.12013.1_transcript10257_f3p0_1950_g1/PuSMRT_PB.12013.3_transcript12698_f2p0_1744_g1	-	1-,2-	Alternative 3' splice site(A3SS)	gi|566214153|ref|XM_006371774.1|	2428	0	Populus trichocarpa hypothetical protein (POPTR_0018s04090g) mRNA, complete cds	Potri.018G001900	gi|566214154|ref|XP_006371836.1|	2111	0	hypothetical protein POPTR_0018s04090g [Populus trichocarpa]	Q2MHE4	296	3e-90	Serine/threonine-protein kinase HT1	.	.	.	.	pfam07714	Pkinase_Tyr	Protein tyrosine kinase.	.	.	GO:0005524|ATP binding;GO:0004674|protein serine/threonine kinase activity;	.	.
PB.12057	PuSMRT_PB.12057.3_transcript1036_f4p0_3945_g1,PuSMRT_PB.12057.1_transcript2606_f4p0_3332_g1	-	0,1^2-	Retained intron(RI)	gi|566213900|ref|XM_002324305.2|	3355	0	Populus trichocarpa RNA recognition motif-containing family protein (POPTR_0018s02740g) mRNA, complete cds	Potri.018G017200	gi|566213901|ref|XP_002324341.2|	4251	0	RNA recognition motif-containing family protein [Populus trichocarpa]	Q9C5J3	1179	0	Protein RRC1	YBR212w	63.5	2e-09	COG0724	pfam01805	Surp	Surp module. This domain is also known as the SWAP domain. SWAP stands for Suppressor-of-White-APricot. It has been suggested that these domains may be RNA binding.	GO:0006397|mRNA processing;GO:0008380|RNA splicing;	GO:0016607|nuclear speck;	GO:0000166|nucleotide binding;GO:0003723|RNA binding;	K12842	SR140; U2-associated protein SR140
PB.12074	PuSMRT_PB.12074.3_transcript2061_f2p0_3519_g1,PuSMRT_PB.12074.1_transcript382_f2p0_4725_g1/PuSMRT_PB.12074.2_transcript1099_f2p0_3989_g1	+	0,1^2-	Retained intron(RI)	gi|743882101|ref|XM_011038351.1|	4356	0	PREDICTED: Populus euphratica CHD3-type chromatin-remodeling factor PICKLE (LOC105134082), transcript variant X1, mRNA	Potri.018G021100	gi|743882102|ref|XP_011036653.1|	7328	0	PREDICTED: CHD3-type chromatin-remodeling factor PICKLE isoform X1 [Populus euphratica]	Q9S775	1816	0	CHD3-type chromatin-remodeling factor PICKLE	.	.	.	.	pfam00176	SNF2_N	SNF2 family N-terminal domain. This domain is found in proteins involved in a variety of processes including transcription regulation (e.g., SNF2, STH1, brahma, MOT1), DNA repair (e.g., ERCC6, RAD16, RAD5), DNA recombination (e.g., RAD54), and chromatin unwinding (e.g., ISWI) as well as a variety of other proteins with little functional information (e.g., lodestar, ETL1).	GO:0008283|cell proliferation;GO:0016569|covalent chromatin modification;GO:0006338|chromatin remodeling;GO:0009736|cytokinin-activated signaling pathway;GO:0009788|negative regulation of abscisic acid-activated signaling pathway;GO:0045892|negative regulation of transcription, DNA-templated;GO:2000023|regulation of lateral root development;GO:0009733|response to auxin;GO:0009739|response to gibb…	GO:0005634|nucleus;	GO:0005524|ATP binding;GO:0003677|DNA binding;GO:0004386|helicase activity;GO:0008270|zinc ion binding;	K11643	CHD4, MI2B; chromodomain-helicase-DNA-binding protein 4 [EC:3.6.4.12]
PB.12088	PuSMRT_PB.12088.1_transcript11169_f2p0_1874_g1/PuSMRT_PB.12088.2_transcript5810_f2p0_2576_g1,PuSMRT_PB.12088.3_transcript10122_f2p0_1977_g1	+	0,1-2^	Skipped exon(SE)	gi|566213796|ref|XM_002324848.2|	1352	0	Populus trichocarpa hypothetical protein (POPTR_0018s02130g) mRNA, complete cds	Potri.018G023400	gi|224143217|ref|XP_002324884.1|	2118	0	hypothetical protein POPTR_0018s02130g [Populus trichocarpa]	Q6P6Q9	153	4e-38	Calcium uptake protein 1, mitochondrial	.	.	.	.	pfam13499	EF-hand_7	EF-hand domain pair.	GO:0070509|calcium ion import;GO:0036444|calcium ion transmembrane import into mitochondrion;GO:0051560|mitochondrial calcium ion homeostasis;GO:0006851|mitochondrial calcium ion transport;GO:0051561|positive regulation of mitochondrial calcium ion concentration;	GO:0034704|calcium channel complex;GO:0032592|integral component of mitochondrial membrane;GO:0005743|mitochondrial inner membrane;GO:0005758|mitochondrial intermembrane space;GO:1990246|uniplex complex;	GO:0005509|calcium ion binding;	.	.
PB.12143	PuSMRT_PB.12143.1_transcript8612_f2p0_2138_g1,PuSMRT_PB.12143.2_transcript9349_f2p0_2050_g1	-	0,1^2-	Retained intron(RI)	gi|566214794|ref|XM_002324182.2|	1749	0	Populus trichocarpa hypothetical protein (POPTR_0018s08050g) mRNA, complete cds	Potri.018G044400	gi|566214795|ref|XP_002324218.2|	2764	0	hypothetical protein POPTR_0018s08050g [Populus trichocarpa]	Q6PAV2	99	6e-20	Probable E3 ubiquitin-protein ligase HERC4	SPBC557.03c	72.4	2e-12	COG5184	pfam00415	RCC1	Regulator of chromosome condensation (RCC1) repeat.	GO:0030154|cell differentiation;GO:0016567|protein ubiquitination;GO:0042787|protein ubiquitination involved in ubiquitin-dependent protein catabolic process;GO:0007283|spermatogenesis;	GO:0005737|cytoplasm;GO:0005829|cytosol;GO:0005634|nucleus;	GO:0061630|ubiquitin protein ligase activity;GO:0004842|ubiquitin-protein transferase activity;	K10615	HERC4; E3 ubiquitin-protein ligase HERC4 [EC:2.3.2.26]
PB.12152	PuSMRT_PB.12152.2_transcript3140_f2p0_3197_g1,PuSMRT_PB.12152.1_transcript6248_f4p0_2471_g1/PuSMRT_PB.12152.7_transcript7097_f3p0_2376_g1/PuSMRT_PB.12152.8_transcript8356_f4p0_2162_g1	-	0,1^2-	Retained intron(RI)	gi|566214850|ref|XM_002324167.2|	2300	0	Populus trichocarpa small MutS related domain-containing family protein (POPTR_0018s08370g) mRNA, complete cds	Potri.018G047700	gi|224141701|ref|XP_002324203.1|	2918	0	small MutS related domain-containing family protein [Populus trichocarpa]	O64843	701	0	Polyadenylate-binding protein-interacting protein 7	.	.	.	.	pfam08590	DUF1771	Domain of unknown function (DUF1771). This domain is always found adjacent to pfam01713.	.	GO:0009507|chloroplast;	.	.	.
PB.12165	PuSMRT_PB.12165.2_transcript1843_f6p0_3579_g1,PuSMRT_PB.12165.1_transcript2011_f11p0_3492_g1	+	0,1^2-	Retained intron(RI)	gi|743879216|ref|XM_011037560.1|	2677	0	PREDICTED: Populus euphratica serine/threonine-protein kinase EDR1-like (LOC105133525), mRNA	Potri.018G053800	gi|743879217|ref|XP_011035862.1|	4860	0	PREDICTED: serine/threonine-protein kinase EDR1-like [Populus euphratica]	Q9FPR3	439	3e-133	Serine/threonine-protein kinase EDR1	.	.	.	.	pfam14381	EDR1	Ethylene-responsive protein kinase Le-CTR1. EDR1 regulates disease resistance and ethylene-induced senescence, and is also involved in stress response signalling and cell death regulation.	GO:0009738|abscisic acid-activated signaling pathway;GO:0008219|cell death;GO:0002229|defense response to oomycetes;GO:0009873|ethylene-activated signaling pathway;GO:0000165|MAPK cascade;GO:0009788|negative regulation of abscisic acid-activated signaling pathway;GO:0046777|protein autophosphorylation;GO:1900424|regulation of defense response to bacterium;GO:1900150|regulation of defense response…	GO:0005829|cytosol;GO:0005769|early endosome;GO:0005783|endoplasmic reticulum;GO:0005768|endosome;GO:0005634|nucleus;GO:0005886|plasma membrane;GO:0005802|trans-Golgi network;GO:0012510|trans-Golgi network transport vesicle membrane;	GO:0005524|ATP binding;GO:0016301|kinase activity;GO:0004709|MAP kinase kinase kinase activity;GO:0004712|protein serine/threonine/tyrosine kinase activity;	.	.
PB.1221	PuSMRT_PB.1221.1_transcript1835_f2p0_3626_g1,PuSMRT_PB.1221.2_transcript3041_f2p0_3201_g1	+	0,1^2-	Retained intron(RI)	gi|566153145|ref|XM_002298790.2|	4124	0	Populus trichocarpa hypothetical protein (POPTR_0001s36690g) mRNA, complete cds	Potri.001G356800	gi|743906606|ref|XP_011046726.1|	3569	0	PREDICTED: splicing factor, suppressor of white-apricot homolog isoform X2 [Populus euphratica]	Q12872	73.2	2e-11	Splicing factor, suppressor of white-apricot homolog	.	.	.	.	pfam09750	DRY_EERY	Alternative splicing regulator. This entry represents the conserved N-terminal region of SWAP (suppressor-of-white-apricot protein) proteins. This region contains two highly conserved motifs, viz: DRY and EERY, which appear to be the sites for alternative splicing of exons 2 and 3 of the SWAP mRNA. These proteins are thus thought to be involved in auto-regulation of pre-mRNA splicing. Most family…	GO:0000380|alternative mRNA splicing, via spliceosome;GO:0000395|mRNA 5'-splice site recognition;GO:0048025|negative regulation of mRNA splicing, via spliceosome;GO:0006355|regulation of transcription, DNA-templated;GO:0006351|transcription, DNA-templated;	GO:0005634|nucleus;	GO:0003723|RNA binding;	.	.
PB.12226	PuSMRT_PB.12226.2_transcript14392_f3p0_1622_g1,PuSMRT_PB.12226.1_transcript15001_f2p0_1602_g1	+	1-,2-	Alternative 3' splice site(A3SS)	gi|566214561|ref|XM_006371885.1|	2763	0	Populus trichocarpa hypothetical protein (POPTR_0018s06600g) mRNA, complete cds	Potri.018G070500	gi|566214562|ref|XP_006371947.1|	1256	2e-161	hypothetical protein POPTR_0018s06600g [Populus trichocarpa]	.	.	.	.	.	.	.	.	pfam07800	DUF1644	Protein of unknown function (DUF1644). This family consists of sequences found in a number of hypothetical plant proteins of unknown function. The region of interest contains nine highly conserved cysteine residues and is approximately 160 amino acids in length, and is probably a zinc-binding domain.	.	.	.	.	.
PB.12240	PuSMRT_PB.12240.2_transcript4103_f4p0_2922_g1,PuSMRT_PB.12240.3_transcript4361_f5p0_2861_g1	-	1-,2-	Alternative 3' splice site(A3SS)	gi|743900279|ref|XM_011045135.1|	2591	0	PREDICTED: Populus euphratica probable ADP-ribosylation factor GTPase-activating protein AGD14 (LOC105138902), transcript variant X1, mRNA	Potri.018G076200	gi|743900280|ref|XP_011043437.1|	3348	0	PREDICTED: probable ADP-ribosylation factor GTPase-activating protein AGD14 [Populus euphratica]	Q8RXE7	218	7e-59	Probable ADP-ribosylation factor GTPase-activating protein AGD14	SPAC824.09c	58.2	5e-08	COG5347	pfam01412	ArfGap	Putative GTPase activating protein for Arf. Putative zinc fingers with GTPase activating proteins (GAPs) towards the small GTPase, Arf. The GAP of ARD1 stimulates GTPase hydrolysis for ARD1 but not ARFs.	.	.	GO:0005096|GTPase activator activity;GO:0046872|metal ion binding;	.	.
PB.12261	PuSMRT_PB.12261.2_transcript3566_f4p0_2988_g1,PuSMRT_PB.12261.1_transcript2197_f2p0_3470_g1	-	1^,2^	Alternative 5' splice site(A5SS)	gi|566214924|ref|XM_002324965.2|	1029	0	Populus trichocarpa RNA-binding family protein (POPTR_0018s08970g) mRNA, complete cds	Potri.018G083100	gi|743909785|ref|XP_011048382.1|	1016	4e-132	PREDICTED: uncharacterized protein LOC105142447 isoform X1 [Populus euphratica]	Q92804	52.8	5e-06	TATA-binding protein-associated factor 2N	.	.	.	.	pfam00641	zf-RanBP	Zn-finger in Ran binding protein and others.	GO:0045893|positive regulation of transcription, DNA-templated;	GO:0005737|cytoplasm;GO:0005654|nucleoplasm;GO:0005634|nucleus;	GO:0003677|DNA binding;GO:0000166|nucleotide binding;GO:0044822|poly(A) RNA binding;GO:0008270|zinc ion binding;	K14651	TAF15, NPL3; transcription initiation factor TFIID subunit 15
PB.12277	PuSMRT_PB.12277.1_transcript5414_f3p0_2704_g1,PuSMRT_PB.12277.2_transcript5005_f2p0_2726_g1	+	1-,2-	Alternative 3' splice site(A3SS)	gi|566214965|ref|XM_002324402.2|	2764	0	Populus trichocarpa hypothetical protein (POPTR_0018s09250g) mRNA, complete cds	Potri.018G085500	gi|566214966|ref|XP_002324438.2|	3588	0	hypothetical protein POPTR_0018s09250g [Populus trichocarpa]	Q9FFN2	314	2e-94	Probable glycosyltransferase At5g03795	.	.	.	.	pfam03016	Exostosin	Exostosin family. The EXT family is a family of tumor suppressor genes. Mutations of EXT1 on 8q24.1, EXT2 on 11p11-13, and EXT3 on 19p have been associated with the autosomal dominant disorder known as hereditary multiple exostoses (HME). This is the most common known skeletal dysplasia. The chromosomal locations of other EXT genes suggest association with other forms of neoplasia. EXT1 and EXT2 …	GO:0071555|cell wall organization;	GO:0000139|Golgi membrane;GO:0016021|integral component of membrane;	GO:0016757|transferase activity, transferring glycosyl groups;	.	.
PB.12286	PuSMRT_PB.12286.2_transcript6054_f2p0_2522_g1,PuSMRT_PB.12286.1_transcript7291_f3p0_2333_g1/PuSMRT_PB.12286.3_transcript7725_f11p0_2200_g1/PuSMRT_PB.12286.4_transcript10312_f2p0_1967_g1/PuSMRT_PB.12286.5_transcript14603_f3p0_1599_g1/PuSMRT_PB.12286.8_transcript18567_f4p0_1291_g1	+	0,1^2-	Retained intron(RI)	gi|566214992|ref|XM_002324414.2|	1855	0	Populus trichocarpa hypothetical protein (POPTR_0018s09380g) mRNA, complete cds	Potri.018G086700	gi|224142207|ref|XP_002324450.1|	2853	0	hypothetical protein POPTR_0018s09380g [Populus trichocarpa]	P34105	1090	0	NADP-dependent malic enzyme	ZsfcA	406	1e-130	COG0281	pfam03949	Malic_M	Malic enzyme, NAD binding domain.	GO:0006108|malate metabolic process;	GO:0005737|cytoplasm;	GO:0004471|malate dehydrogenase (decarboxylating) (NAD+) activity;GO:0004473|malate dehydrogenase (decarboxylating) (NADP+) activity;GO:0046872|metal ion binding;GO:0051287|NAD binding;GO:0008948|oxaloacetate decarboxylase activity;	.	.
PB.12286	PuSMRT_PB.12286.2_transcript6054_f2p0_2522_g1,PuSMRT_PB.12286.3_transcript7725_f11p0_2200_g1	+	0,1^2-	Retained intron(RI)	gi|566214992|ref|XM_002324414.2|	1855	0	Populus trichocarpa hypothetical protein (POPTR_0018s09380g) mRNA, complete cds	Potri.018G086700	gi|224142207|ref|XP_002324450.1|	2853	0	hypothetical protein POPTR_0018s09380g [Populus trichocarpa]	P34105	1090	0	NADP-dependent malic enzyme	ZsfcA	406	1e-130	COG0281	pfam03949	Malic_M	Malic enzyme, NAD binding domain.	GO:0006108|malate metabolic process;	GO:0005737|cytoplasm;	GO:0004471|malate dehydrogenase (decarboxylating) (NAD+) activity;GO:0004473|malate dehydrogenase (decarboxylating) (NADP+) activity;GO:0046872|metal ion binding;GO:0051287|NAD binding;GO:0008948|oxaloacetate decarboxylase activity;	.	.
PB.12302	PuSMRT_PB.12302.1_transcript2747_f2p0_3305_g1,PuSMRT_PB.12302.4_transcript8267_f12p0_2176_g1	-	0,1^2-	Retained intron(RI)	gi|566215064|ref|XM_006372017.1|	1931	0	Populus trichocarpa hypothetical protein (POPTR_0018s09780g) mRNA, complete cds	Potri.018G090600	gi|566215061|ref|XP_006372077.1|	2995	0	hypothetical protein POPTR_0018s09760g [Populus trichocarpa]	Q9ZPI1	939	0	Lysine--tRNA ligase, cytoplasmic	SPBC17G9.03c	615	0	COG1190	pfam00152	tRNA-synt_2	tRNA synthetases class II (D, K and N).	GO:0006430|lysyl-tRNA aminoacylation;	GO:0005829|cytosol;GO:0009506|plasmodesma;	GO:0005524|ATP binding;GO:0003677|DNA binding;GO:0004824|lysine-tRNA ligase activity;GO:0046872|metal ion binding;	K04567	KARS, lysS; lysyl-tRNA synthetase, class II [EC:6.1.1.6]
PB.12318	PuSMRT_PB.12318.3_transcript3413_f2p0_3109_g1,PuSMRT_PB.12318.1_transcript12789_f5p0_1720_g1/PuSMRT_PB.12318.2_transcript25952_f3p0_917_g1	-	0,1^2-	Retained intron(RI)	gi|743901316|ref|XM_011045674.1|	269	9e-138	PREDICTED: Populus euphratica uncharacterized LOC105139289 (LOC105139289), transcript variant X3, mRNA	Potri.018G093300	.	.	.	.	.	.	.	.	.	.	.	.	pfam13575	DUF4135	Domain of unknown function (DUF4135). This presumed domain is functionally uncharacterized. This domain family is found in bacteria and archaea, and is approximately 380 amino acids in length. The family is found in association with pfam05147. This domain may be involved in synthesis of a lantibiotic compound.	.	.	.	.	.
PB.1236	PuSMRT_PB.1236.1_transcript4527_f3p0_2823_g1,PuSMRT_PB.1236.2_transcript18344_f10p0_1239_g1/PuSMRT_PB.1236.3_transcript18050_f4p0_1323_g1/PuSMRT_PB.1236.4_transcript24999_f2p0_964_g1	+	0,1^2-	Retained intron(RI)	gi|566153192|ref|XM_002298808.2|	721	0	Populus trichocarpa rcd1-like cell differentiation family protein (POPTR_0001s37000g) mRNA, complete cds	Potri.001G359300	gi|224056413|ref|XP_002298844.1|	912	2e-113	rcd1-like cell differentiation family protein [Populus trichocarpa]	Q6P819	255	5e-77	Cell differentiation protein RCD1 homolog	SPAC29B12.06c	233	2e-69	COG5209	pfam04078	Rcd1	Cell differentiation family, Rcd1-like. Two of the members in this family have been characterized as being involved in regulation of Ste11 regulated sex genes. Mammalian Rcd1 is a novel transcriptional cofactor that mediates retinoic acid-induced cell differentiation.	GO:0031047|gene silencing by RNA;GO:0006402|mRNA catabolic process;GO:0033147|negative regulation of intracellular estrogen receptor signaling pathway;GO:0017148|negative regulation of translation;GO:2000327|positive regulation of ligand-dependent nuclear receptor transcription coactivator activity;GO:0006355|regulation of transcription, DNA-templated;GO:0006351|transcription, DNA-templated;	GO:0030014|CCR4-NOT complex;GO:0030015|CCR4-NOT core complex;GO:0000932|cytoplasmic mRNA processing body;GO:0005634|nucleus;	.	K12606	RCD1, CNOT9, CAF40; CCR4-NOT transcription complex subunit 9
PB.1236	PuSMRT_PB.1236.3_transcript18050_f4p0_1323_g1,PuSMRT_PB.1236.1_transcript4527_f3p0_2823_g1/PuSMRT_PB.1236.2_transcript18344_f10p0_1239_g1	+	1-2^,3-4^	Mutually exclusive exons(MXE)	gi|566153192|ref|XM_002298808.2|	721	0	Populus trichocarpa rcd1-like cell differentiation family protein (POPTR_0001s37000g) mRNA, complete cds	Potri.001G359300	gi|224056413|ref|XP_002298844.1|	912	2e-113	rcd1-like cell differentiation family protein [Populus trichocarpa]	Q6P819	255	5e-77	Cell differentiation protein RCD1 homolog	SPAC29B12.06c	233	2e-69	COG5209	pfam04078	Rcd1	Cell differentiation family, Rcd1-like. Two of the members in this family have been characterized as being involved in regulation of Ste11 regulated sex genes. Mammalian Rcd1 is a novel transcriptional cofactor that mediates retinoic acid-induced cell differentiation.	GO:0031047|gene silencing by RNA;GO:0006402|mRNA catabolic process;GO:0033147|negative regulation of intracellular estrogen receptor signaling pathway;GO:0017148|negative regulation of translation;GO:2000327|positive regulation of ligand-dependent nuclear receptor transcription coactivator activity;GO:0006355|regulation of transcription, DNA-templated;GO:0006351|transcription, DNA-templated;	GO:0030014|CCR4-NOT complex;GO:0030015|CCR4-NOT core complex;GO:0000932|cytoplasmic mRNA processing body;GO:0005634|nucleus;	.	K12606	RCD1, CNOT9, CAF40; CCR4-NOT transcription complex subunit 9
PB.12362	PuSMRT_PB.12362.1_transcript2024_f2p0_3529_g1,PuSMRT_PB.12362.3_transcript5870_f3p0_2653_g1/PuSMRT_PB.12362.5_transcript7687_f2p0_2273_g1	-	0,1^2-	Retained intron(RI)	.	.	.	.	Potri.018G106200	.	.	.	.	.	.	.	.	.	.	.	.	pfam00902	TatC	Sec-independent protein translocase protein (TatC). The bacterial Tat system has a remarkable ability to transport folded proteins even enzyme complexes across the cytoplasmic membrane. It is structurally and mechanistically similar to the Delta pH-driven thylakoidal protein import pathway. A functional Tat system or Delta pH-dependent pathway requires three integral membrane proteins: TatA/Tha4,…	.	.	.	.	.
PB.1238	PuSMRT_PB.1238.1_transcript2514_f3p0_3356_g1/PuSMRT_PB.1238.2_transcript2649_f2p0_3319_g1,PuSMRT_PB.1238.3_transcript3110_f5p0_3202_g1	-	1-,2-	Alternative 3' splice site(A3SS)	gi|743908187|ref|XM_011049240.1|	3086	0	PREDICTED: Populus euphratica DNA topoisomerase 1-like (LOC105141862), transcript variant X1, mRNA	Potri.001G359700	gi|224061073|ref|XP_002300344.1|	3813	0	DNA topoisomerase family protein [Populus trichocarpa]	Q9FJ79	933	0	DNA topoisomerase 1 beta	SPBC1703.14c_1	404	3e-126	COG3569	pfam02919	Topoisom_I_N	Eukaryotic DNA topoisomerase I, DNA binding fragment. Topoisomerase I promotes the relaxation of DNA superhelical tension by introducing a transient single-stranded break in duplex DNA and are vital for the processes of replication, transcription, and recombination. This family may be more than one structural domain.	GO:0006338|chromatin remodeling;GO:0007059|chromosome segregation;GO:0006260|DNA replication;GO:0006265|DNA topological change;	GO:0016020|membrane;GO:0005730|nucleolus;GO:0031298|replication fork protection complex;	GO:0003677|DNA binding;GO:0003917|DNA topoisomerase type I activity;	K03163	TOP1; DNA topoisomerase I [EC:5.99.1.2]
PB.12402	PuSMRT_PB.12402.2_transcript3666_f2p0_3035_g1,PuSMRT_PB.12402.1_transcript4807_f6p0_2730_g1	-	0,1^2-	Retained intron(RI)	gi|743806523|ref|XM_011019629.1|	2344	0	PREDICTED: Populus euphratica large proline-rich protein bag6-B (LOC105121109), transcript variant X2, mRNA	Potri.018G115500	gi|743806524|ref|XP_011017931.1|	3414	0	PREDICTED: large proline-rich protein bag6-B isoform X2 [Populus euphratica]	A7X5R6	80.1	1e-13	Large proline-rich protein BAG6	SPAC26A3.16	75.5	2e-13	COG5272	pfam00240	ubiquitin	Ubiquitin family. This family contains a number of ubiquitin-like proteins: SUMO (smt3 homologue) Nedd8, Elongin B, Rub1, and Parkin. A number of them are thought to carry a distinctive five-residue motif termed the proteasome-interacting motif (PIM), which may have a biologically significant role in protein delivery to proteasomes and recruitment of proteasomes to transcription sites.	GO:0007420|brain development;GO:0030154|cell differentiation;GO:0016569|covalent chromatin modification;GO:0009790|embryo development;GO:0002376|immune system process;GO:0018393|internal peptidyl-lysine acetylation;GO:0042771|intrinsic apoptotic signaling pathway in response to DNA damage by p53 class mediator;GO:0070059|intrinsic apoptotic signaling pathway in response to endoplasmic reticulum s…	GO:0071818|BAT3 complex;GO:0005829|cytosol;GO:0005634|nucleus;	GO:0031593|polyubiquitin binding;GO:0070628|proteasome binding;GO:0043022|ribosome binding;	.	.
PB.12420	PuSMRT_PB.12420.1_transcript1828_f3p0_3616_g1,PuSMRT_PB.12420.2_transcript4427_f2p0_2864_g1	+	0,1^2-	Retained intron(RI)	gi|566259758|ref|XM_006389373.1|	2626	0	Populus trichocarpa chloride channel-like family protein (POPTR_0025s00680g) mRNA, complete cds	Potri.018G124100	gi|566259759|ref|XP_006389435.1|	3784	0	chloride channel-like family protein [Populus trichocarpa]	P60300	1167	0	Putative chloride channel-like protein CLC-g	SPBC19C7.11_1	102	1e-21	COG0038	pfam00654	Voltage_CLC	Voltage gated chloride channel. This family of ion channels contains 10 or 12 transmembrane helices. Each protein forms a single pore. It has been shown that some members of this family form homodimers. In terms of primary structure, they are unrelated to known cation channels or other types of anion channels. Three ClC subfamilies are found in animals. ClC-1 is involved in setting and restoring …	.	GO:0034707|chloride channel complex;	GO:0005247|voltage-gated chloride channel activity;	K05016	CLCN7; chloride channel 7
PB.12434	PuSMRT_PB.12434.4_transcript2755_f2p0_3303_g1,PuSMRT_PB.12434.2_transcript971_f5p0_4026_g1/PuSMRT_PB.12434.3_transcript2346_f2p0_3413_g1/PuSMRT_PB.12434.5_transcript2224_f2p0_3457_g1	+	1-,2-	Alternative 3' splice site(A3SS)	gi|566215558|ref|XM_002324605.2|	4082	0	Populus trichocarpa WD-40 repeat family protein (POPTR_0018s12810g) mRNA, complete cds	Potri.018G128000	gi|566215559|ref|XP_002324641.2|	5697	0	WD-40 repeat family protein [Populus trichocarpa]	Q27GK7	1645	0	Topless-related protein 4	.	.	.	.	pfam00400	WD40	WD domain, G-beta repeat.	GO:0010072|primary shoot apical meristem specification;GO:0006355|regulation of transcription, DNA-templated;GO:0006351|transcription, DNA-templated;	GO:0005634|nucleus;	.	.	.
PB.12434	PuSMRT_PB.12434.5_transcript2224_f2p0_3457_g1,PuSMRT_PB.12434.2_transcript971_f5p0_4026_g1/PuSMRT_PB.12434.3_transcript2346_f2p0_3413_g1/PuSMRT_PB.12434.4_transcript2755_f2p0_3303_g1/PuSMRT_PB.12434.6_transcript3946_f2p0_2962_g1/PuSMRT_PB.12434.7_transcript5169_f2p0_2695_g1	+	0,1^2-	Retained intron(RI)	gi|566215558|ref|XM_002324605.2|	4082	0	Populus trichocarpa WD-40 repeat family protein (POPTR_0018s12810g) mRNA, complete cds	Potri.018G128000	gi|566215559|ref|XP_002324641.2|	5697	0	WD-40 repeat family protein [Populus trichocarpa]	Q27GK7	1645	0	Topless-related protein 4	.	.	.	.	pfam00400	WD40	WD domain, G-beta repeat.	GO:0010072|primary shoot apical meristem specification;GO:0006355|regulation of transcription, DNA-templated;GO:0006351|transcription, DNA-templated;	GO:0005634|nucleus;	.	.	.
PB.1249	PuSMRT_PB.1249.2_transcript7537_f2p0_2304_g1,PuSMRT_PB.1249.1_transcript7336_f3p0_2339_g1	-	0,1-2^	Skipped exon(SE)	gi|743917005|ref|XM_011004185.1|	2597	0	PREDICTED: Populus euphratica putative DUF21 domain-containing protein At3g13070, chloroplastic (LOC105109463), transcript variant X1, mRNA	Potri.001G362100	gi|743917006|ref|XP_011002487.1|	3222	0	PREDICTED: putative DUF21 domain-containing protein At3g13070, chloroplastic isoform X1 [Populus euphratica]	Q84R21	858	0	DUF21 domain-containing protein At1g55930, chloroplastic	FN1486	214	6e-60	COG1253	pfam01595	DUF21	Domain of unknown function DUF21. This transmembrane region has no known function. Many of the sequences in this family are annotated as hemolysins, however this is due to a similarity to Treponema hyodysenteriae hemolysin C that does not contain this domain. This domain is found in the N-terminus of the proteins adjacent to two intracellular CBS domains pfam00571.	GO:0006810|transport;	GO:0009941|chloroplast envelope;GO:0031969|chloroplast membrane;GO:0016021|integral component of membrane;GO:0009536|plastid;	GO:0050660|flavin adenine dinucleotide binding;GO:0016614|oxidoreductase activity, acting on CH-OH group of donors;	.	.
PB.12490	PuSMRT_PB.12490.2_transcript9176_f2p0_2076_g1,PuSMRT_PB.12490.1_transcript7737_f2p0_2259_g1/PuSMRT_PB.12490.3_transcript8361_f8p0_2151_g1	+	1^,2^	Alternative 5' splice site(A5SS)	gi|743805159|ref|XM_011019254.1|	1955	0	PREDICTED: Populus euphratica uncharacterized LOC105120872 (LOC105120872), mRNA	Potri.018G151300	gi|566215947|ref|XP_006372268.1|	2799	0	hypothetical protein POPTR_0018s14820g [Populus trichocarpa]	.	.	.	.	.	.	.	.	pfam14259	RRM_6	RNA recognition motif (a.k.a. RRM, RBD, or RNP domain).	.	.	.	.	.
PB.12493	PuSMRT_PB.12493.1_transcript12650_f2p0_1732_g1,PuSMRT_PB.12493.2_transcript13719_f2p0_1667_g1	-	0,1^2-	Retained intron(RI)	gi|566222180|ref|XM_006370833.1|	1728	0	Populus trichocarpa hypothetical protein (POPTR_0019s01510g) mRNA, complete cds	Potri.019G001100	gi|566222181|ref|XP_006370895.1|	1741	0	hypothetical protein POPTR_0019s01510g [Populus trichocarpa]	Q8GWX2	429	9e-145	Probable magnesium transporter NIPA6	.	.	.	.	pfam05653	Mg_trans_NIPA	Magnesium transporter NIPA. NIPA (nonimprinted in Prader-Willi/Angelman syndrome) is a family of integral membrane proteins which function as magnesium transporters.	GO:0015693|magnesium ion transport;	GO:0005769|early endosome;GO:0016021|integral component of membrane;GO:0016020|membrane;GO:0005886|plasma membrane;	GO:0015095|magnesium ion transmembrane transporter activity;	.	.
PB.12522	PuSMRT_PB.12522.3_transcript327_f2p0_4866_g1,PuSMRT_PB.12522.1_transcript2647_f2p0_3317_g1/PuSMRT_PB.12522.2_transcript2030_f2p0_3540_g1	-	0,1^2-	Retained intron(RI)	gi|566228138|ref|XM_002325736.2|	4579	0	Populus trichocarpa hypothetical protein (POPTR_0019s03550g) mRNA, complete cds	Potri.019G018700	gi|566228139|ref|XP_002325772.2|	6494	0	hypothetical protein POPTR_0019s03550g [Populus trichocarpa]	C0SUT9	1261	0	Putative lysine-specific demethylase JMJ16	.	.	.	.	pfam02373	JmjC	JmjC domain, hydroxylase. The JmjC domain belongs to the Cupin superfamily. JmjC-domain proteins may be protein hydroxylases that catalyse a novel histone modification. This is confirmed to be a hydroxylase: the human JmjC protein named Tyw5p unexpectedly acts in the biosynthesis of a hypermodified nucleoside, hydroxy-wybutosine, in tRNA-Phe by catalyzing hydroxylation.	GO:0016569|covalent chromatin modification;GO:0006355|regulation of transcription, DNA-templated;GO:0006351|transcription, DNA-templated;	GO:0005634|nucleus;	GO:0051213|dioxygenase activity;GO:0046872|metal ion binding;GO:0003700|transcription factor activity, sequence-specific DNA binding;	K11446	KDM5, JARID1; histone demethylase JARID1 [EC:1.14.11.-]
PB.12543	PuSMRT_PB.12543.2_transcript3620_f2p0_3011_g1,PuSMRT_PB.12543.1_transcript2542_f7p0_3346_g1	+	1-,2-	Alternative 3' splice site(A3SS)	gi|566229821|ref|XM_002325332.2|	3091	0	Populus trichocarpa O-linked N-acetyl glucosamine transferase family protein (POPTR_0019s04230g) mRNA, complete cds	Potri.019G025600	gi|743916080|ref|XP_011002011.1|	5141	0	PREDICTED: probable UDP-N-acetylglucosamine--peptide N-acetylglucosaminyltransferase SEC [Populus euphratica]	Q9M8Y0	1689	0	Probable UDP-N-acetylglucosamine--peptide N-acetylglucosaminyltransferase SEC	CC1107	283	5e-81	COG3914	pfam13844	Glyco_transf_41	Glycosyl transferase family 41. This family of glycosyltransferases includes O-linked beta-N-acetylglucosamine (O-GlcNAc) transferase, an enzyme which catalyses the addition of O-GlcNAc to serine and threonine residues. In addition to its function as an O-GlcNAc transferase, human OGT also appears to proteolytically cleave the epigenetic cell-cycle regulator HCF-1.	GO:0007275|multicellular organismal development;GO:0006493|protein O-linked glycosylation;	.	GO:0016757|transferase activity, transferring glycosyl groups;	K09667	OGT; protein O-GlcNAc transferase [EC:2.4.1.255]
PB.12554	PuSMRT_PB.12554.1_transcript3001_f42p0_3173_g1/PuSMRT_PB.12554.2_transcript3823_f3p0_2978_g1/PuSMRT_PB.12554.3_transcript4253_f2p0_2889_g1/PuSMRT_PB.12554.5_transcript6300_f3p0_2481_g1/PuSMRT_PB.12554.6_transcript11534_f2p0_1826_g1,PuSMRT_PB.12554.4_transcript5400_f2p0_2649_g1	+	1-,2-	Alternative 3' splice site(A3SS)	gi|566231440|ref|XM_002325373.2|	2523	0	Populus trichocarpa hypothetical protein (POPTR_0019s04840g) mRNA, complete cds	Potri.019G032800	gi|566231441|ref|XP_002325409.2|	3977	0	hypothetical protein POPTR_0019s04840g [Populus trichocarpa]	O75175	204	4e-53	CCR4-NOT transcription complex subunit 3	SPAC1B3.05	159	2e-39	COG5665	pfam04065	Not3	Not1 N-terminal domain, CCR4-Not complex component.	GO:0006977|DNA damage response, signal transduction by p53 class mediator resulting in cell cycle arrest;GO:0031047|gene silencing by RNA;GO:0017148|negative regulation of translation;GO:0000288|nuclear-transcribed mRNA catabolic process, deadenylation-dependent decay;GO:0000289|nuclear-transcribed mRNA poly(A) tail shortening;GO:2000036|regulation of stem cell population maintenance;GO:0006355|r…	GO:0030014|CCR4-NOT complex;GO:0030015|CCR4-NOT core complex;GO:0000932|cytoplasmic mRNA processing body;GO:0005829|cytosol;GO:0005634|nucleus;	.	K12580	CNOT3, NOT3; CCR4-NOT transcription complex subunit 3
PB.12613	PuSMRT_PB.12613.1_transcript22148_f2p0_1107_g1,PuSMRT_PB.12613.2_transcript18340_f3p0_1347_g1/PuSMRT_PB.12613.3_transcript20993_f2p0_1165_g1	+	1-,2-	Alternative 3' splice site(A3SS)	gi|566234517|ref|XM_002325350.2|	1127	0	Populus trichocarpa hypothetical protein (POPTR_0019s07720g) mRNA, complete cds	Potri.019G050500	gi|566234518|ref|XP_002325386.2|	1741	0	hypothetical protein POPTR_0019s07720g [Populus trichocarpa]	.	.	.	.	.	.	.	.	pfam12805	FUSC-like	FUSC-like inner membrane protein yccS. This family has similarities to the fusaric acid resistance protein family. The proteins are lodged in the inner membrane.	.	.	.	.	.
PB.12613	PuSMRT_PB.12613.2_transcript18340_f3p0_1347_g1,PuSMRT_PB.12613.1_transcript22148_f2p0_1107_g1	+	1-,2-	Alternative 3' splice site(A3SS)	gi|566234517|ref|XM_002325350.2|	1127	0	Populus trichocarpa hypothetical protein (POPTR_0019s07720g) mRNA, complete cds	Potri.019G050500	gi|566234518|ref|XP_002325386.2|	1741	0	hypothetical protein POPTR_0019s07720g [Populus trichocarpa]	.	.	.	.	.	.	.	.	pfam12805	FUSC-like	FUSC-like inner membrane protein yccS. This family has similarities to the fusaric acid resistance protein family. The proteins are lodged in the inner membrane.	.	.	.	.	.
PB.12613	PuSMRT_PB.12613.3_transcript20993_f2p0_1165_g1,PuSMRT_PB.12613.1_transcript22148_f2p0_1107_g1	+	0,1^2-	Retained intron(RI)	gi|566234517|ref|XM_002325350.2|	1127	0	Populus trichocarpa hypothetical protein (POPTR_0019s07720g) mRNA, complete cds	Potri.019G050500	gi|566234518|ref|XP_002325386.2|	1741	0	hypothetical protein POPTR_0019s07720g [Populus trichocarpa]	.	.	.	.	.	.	.	.	pfam12805	FUSC-like	FUSC-like inner membrane protein yccS. This family has similarities to the fusaric acid resistance protein family. The proteins are lodged in the inner membrane.	.	.	.	.	.
PB.12613	PuSMRT_PB.12613.3_transcript20993_f2p0_1165_g1,PuSMRT_PB.12613.2_transcript18340_f3p0_1347_g1	+	0,1^2-	Retained intron(RI)	gi|566234517|ref|XM_002325350.2|	1127	0	Populus trichocarpa hypothetical protein (POPTR_0019s07720g) mRNA, complete cds	Potri.019G050500	gi|566234518|ref|XP_002325386.2|	1741	0	hypothetical protein POPTR_0019s07720g [Populus trichocarpa]	.	.	.	.	.	.	.	.	pfam12805	FUSC-like	FUSC-like inner membrane protein yccS. This family has similarities to the fusaric acid resistance protein family. The proteins are lodged in the inner membrane.	.	.	.	.	.
PB.12618	PuSMRT_PB.12618.1_transcript11412_f2p0_1855_g1,PuSMRT_PB.12618.2_transcript12544_f2p0_1742_g1	-	1-,2-	Alternative 3' splice site(A3SS)	.	.	.	.	.	.	.	.	.	.	.	.	.	.	.	.	.	.	.	.	.	.	.	.	.
PB.12619	PuSMRT_PB.12619.1_transcript1048_f2p0_4030_g1,PuSMRT_PB.12619.2_transcript1930_f2p0_3561_g1/PuSMRT_PB.12619.3_transcript4217_f2p0_2899_g1	+	1^,2^	Alternative 5' splice site(A5SS)	gi|566234717|ref|XM_002325424.2|	3804	0	Populus trichocarpa exportin1 family protein (POPTR_0019s07900g) mRNA, complete cds	Potri.019G052100	gi|566234718|ref|XP_002325460.2|	5662	0	exportin1 family protein [Populus trichocarpa]	Q9SMV6	1917	0	Protein EXPORTIN 1A	SPAC1805.17	951	0	COG5101	pfam08767	CRM1_C	CRM1 C terminal. CRM1 (also known as Exportin1) mediates the nuclear export of proteins bearing a leucine-rich nuclear export signal (NES). CRM1 forms a complex with the NES containing protein and the small GTPase Ran. This region forms an alpha helical structure formed by six helical hairpin motifs that are structurally similar to the HEAT repeat, but share little sequence similarity to the HEAT…	GO:0009553|embryo sac development;GO:0051028|mRNA transport;GO:0009555|pollen development;GO:0009846|pollen germination;GO:0009860|pollen tube growth;GO:0006611|protein export from nucleus;GO:0046825|regulation of protein export from nucleus;GO:0009408|response to heat;GO:0000055|ribosomal large subunit export from nucleus;GO:0000056|ribosomal small subunit export from nucleus;	GO:0005829|cytosol;GO:0031965|nuclear membrane;GO:0005643|nuclear pore;GO:0005634|nucleus;	GO:0005049|nuclear export signal receptor activity;GO:0004872|receptor activity;	K14290	XPO1, CRM1; exportin-1
PB.12623	PuSMRT_PB.12623.1_transcript4392_f2p0_2855_g1,PuSMRT_PB.12623.2_transcript17552_f2p0_1398_g1/PuSMRT_PB.12623.6_transcript14736_f5p0_1569_g1	-	0,1^2-	Retained intron(RI)	gi|566234983|ref|XM_002325868.2|	1512	0	Populus trichocarpa eIF4-gamma/eIF5/eIF2-epsilon domain-containing family protein (POPTR_0019s08080g) mRNA, complete cds	Potri.019G053600	gi|224146166|ref|XP_002325904.1|	2063	0	eIF4-gamma/eIF5/eIF2-epsilon domain-containing family protein [Populus trichocarpa]	Q2L4X1	228	8e-67	Basic leucine zipper and W2 domain-containing protein 2	.	.	.	.	pfam02020	W2	eIF4-gamma/eIF5/eIF2-epsilon. This domain of unknown function is found at the C-terminus of several translation initiation factors.	GO:0030154|cell differentiation;GO:0007399|nervous system development;	GO:0005913|cell-cell adherens junction;GO:0005737|cytoplasm;GO:0016020|membrane;	GO:0098641|cadherin binding involved in cell-cell adhesion;	.	.
PB.1263	PuSMRT_PB.1263.3_transcript7160_f2p0_2343_g1,PuSMRT_PB.1263.4_transcript7729_f2p0_2260_g1	+	1-,2-	Alternative 3' splice site(A3SS)	gi|566153312|ref|XM_006369942.1|	2400	0	Populus trichocarpa hypothetical protein (POPTR_0001s37610g) mRNA, complete cds	Potri.001G367400	gi|566153313|ref|XP_006370004.1|	1169	2e-144	hypothetical protein POPTR_0001s37610g [Populus trichocarpa]	.	.	.	.	.	.	.	.	pfam08766	DEK_C	DEK C terminal domain. DEK is a chromatin associated protein that is linked with cancers and autoimmune disease. This domain is found at the C terminal of DEK and is of clinical importance since it can reverse the characteristic abnormal DNA-mutagen sensitivity in fibroblasts from ataxia-telangiectasia (A-T) patients. The structure of this domain shows it to be homologous to the E2F/DP transcript…	.	.	.	.	.
PB.12631	PuSMRT_PB.12631.1_transcript11793_f2p0_1805_g1/PuSMRT_PB.12631.2_transcript13205_f4p0_1685_g1/PuSMRT_PB.12631.4_transcript12700_f6p0_1681_g1,PuSMRT_PB.12631.3_transcript12713_f2p0_1757_g1	-	0,1-2^	Skipped exon(SE)	gi|566235665|ref|XM_006371212.1|	1926	0	Populus trichocarpa hypothetical protein (POPTR_0019s08260g) mRNA, complete cds	Potri.019G055000	gi|566235666|ref|XP_006371274.1|	1367	0	hypothetical protein POPTR_0019s08260g [Populus trichocarpa]	Q9CYI4	90.1	5e-18	Putative RNA-binding protein Luc7-like 1	SPCC16A11.13	82	2e-16	COG5200	pfam03194	LUC7	LUC7 N_terminus. This family contains the N terminal region of several LUC7 protein homologues and only contains eukaryotic proteins. LUC7 has been shown to be a U1 snRNA associated protein with a role in splice site recognition. The family also contains human and mouse LUC7 like (LUC7L) proteins and human cisplatin resistance-associated overexpressed protein (CROP).	GO:0006376|mRNA splice site selection;GO:0045843|negative regulation of striated muscle tissue development;	GO:0005634|nucleus;GO:0005685|U1 snRNP;GO:0071004|U2-type prespliceosome;	GO:0042802|identical protein binding;GO:0003729|mRNA binding;GO:0050733|RS domain binding;	.	.
PB.12654	PuSMRT_PB.12654.2_transcript9603_f2p0_2038_g1,PuSMRT_PB.12654.1_transcript21704_f3p0_1134_g1	+	0,1^2-	Retained intron(RI)	gi|743911563|ref|XM_011001343.1|	1194	0	PREDICTED: Populus euphratica methylesterase 17 (LOC105107422), mRNA	Potri.019G061700	gi|566237776|ref|XP_002325617.2|	1476	0	hydrolase family protein [Populus trichocarpa]	Q9SG92	355	7e-119	Methylesterase 17	.	.	.	.	pfam12697	Abhydrolase_6	Alpha/beta hydrolase family. This family contains alpha/beta hydrolase enzymes of diverse specificity.	GO:0033473|indoleacetic acid conjugate metabolic process;GO:0048367|shoot system development;	.	GO:0016788|hydrolase activity, acting on ester bonds;GO:0080030|methyl indole-3-acetate esterase activity;	.	.
PB.12660	PuSMRT_PB.12660.5_transcript16433_f3p0_1445_g1,PuSMRT_PB.12660.4_transcript22407_f72p0_1050_g1	-	0,1^2-	Retained intron(RI)	gi|566238006|ref|XM_006371268.1|	695	0	Populus trichocarpa Chlorophyll a-b binding protein CP26 (POPTR_0019s09140g) mRNA, complete cds	Potri.019G063100	gi|566238007|ref|XP_006371330.1|	730	1e-88	Chlorophyll a-b binding protein CP26 [Populus trichocarpa]	Q9XF89	253	8e-78	Chlorophyll a-b binding protein CP26, chloroplastic	.	.	.	.	pfam00504	Chloroa_b-bind	Chlorophyll A-B binding protein.	GO:0010196|nonphotochemical quenching;GO:0015979|photosynthesis;GO:0009768|photosynthesis, light harvesting in photosystem I;GO:0010207|photosystem II assembly;GO:0018298|protein-chromophore linkage;GO:0009637|response to blue light;GO:0010218|response to far red light;GO:0010114|response to red light;	GO:0009507|chloroplast;GO:0009941|chloroplast envelope;GO:0009534|chloroplast thylakoid;GO:0009535|chloroplast thylakoid membrane;GO:0016021|integral component of membrane;GO:0016020|membrane;GO:0009522|photosystem I;GO:0009783|photosystem II antenna complex;GO:0010287|plastoglobule;GO:0009517|PSII associated light-harvesting complex II;GO:0009579|thylakoid;GO:0042651|thylakoid membrane;	GO:0016168|chlorophyll binding;GO:0046872|metal ion binding;GO:0031409|pigment binding;	K08916	LHCB5; light-harvesting complex II chlorophyll a/b binding protein 5
PB.12672	PuSMRT_PB.12672.5_transcript1841_f4p0_3566_g1,PuSMRT_PB.12672.1_transcript2366_f5p0_3425_g1	-	0,1^2-	Retained intron(RI)	gi|566238767|ref|XM_006371320.1|	3482	0	Populus trichocarpa hypothetical protein (POPTR_0019s09670g) mRNA, complete cds	Potri.019G068700	gi|566238768|ref|XP_006371382.1|	4181	0	hypothetical protein POPTR_0019s09670g [Populus trichocarpa]	Q9LQ55	1256	0	Dynamin-2B	YLL001w	93.6	2e-18	COG0699	pfam00350	Dynamin_N	Dynamin family.	GO:0072583|clathrin-mediated endocytosis;GO:0000266|mitochondrial fission;GO:2000114|regulation of establishment of cell polarity;GO:0009737|response to abscisic acid;GO:0048766|root hair initiation;	GO:0009504|cell plate;GO:0045334|clathrin-coated endocytic vesicle;GO:0005829|cytosol;GO:0005874|microtubule;GO:0005886|plasma membrane;GO:0009506|plasmodesma;GO:0005773|vacuole;	GO:0030276|clathrin binding;GO:0005525|GTP binding;GO:0003924|GTPase activity;GO:0008017|microtubule binding;	K01528	DNM; dynamin GTPase [EC:3.6.5.5]
PB.12680	PuSMRT_PB.12680.2_transcript31221_f2p0_685_g1,PuSMRT_PB.12680.1_transcript31979_f2p0_640_g1	+	1-,2-	Alternative 3' splice site(A3SS)	gi|566239241|ref|XM_002325471.2|	564	0	Populus trichocarpa hypothetical protein (POPTR_0019s10050g) mRNA, complete cds	Potri.019G071800	gi|566239242|ref|XP_002325507.2|	811	6e-108	hypothetical protein POPTR_0019s10050g [Populus trichocarpa]	.	.	.	.	.	.	.	.	pfam04003	Utp12	Dip2/Utp12 Family. This domain is found at the C-terminus of proteins containing WD40 repeats. These proteins are part of the U3 ribonucleoprotein the yeast protein is called Utp12 or DIP2.	.	.	.	.	.
PB.12681	PuSMRT_PB.12681.1_transcript4886_f5p0_2743_g1,PuSMRT_PB.12681.2_transcript5664_f3p0_2628_g1	+	0,1^2-	Retained intron(RI)	gi|743880632|ref|XM_011037956.1|	2414	0	PREDICTED: Populus euphratica far upstream element-binding protein 2-like (LOC105133829), transcript variant X1, mRNA	Potri.019G072500	gi|743880633|ref|XP_011036258.1|	2926	0	PREDICTED: far upstream element-binding protein 2-like [Populus euphratica]	Q96I24	96.7	3e-19	Far upstream element-binding protein 3	MK0513	50.1	6e-06	COG1094	pfam00013	KH_1	KH domain. KH motifs bind RNA in vitro. Autoantibodies to Nova, a KH domain protein, cause paraneoplastic opsoclonus ataxia.	GO:0010628|positive regulation of gene expression;GO:0045944|positive regulation of transcription from RNA polymerase II promoter;GO:0045893|positive regulation of transcription, DNA-templated;GO:0006351|transcription, DNA-templated;	GO:0005737|cytoplasm;GO:0016020|membrane;GO:0005634|nucleus;	GO:0044822|poly(A) RNA binding;GO:0000978|RNA polymerase II core promoter proximal region sequence-specific DNA binding;GO:0001077|transcriptional activator activity, RNA polymerase II core promoter proximal region sequence-specific binding;	K13210	FUBP; far upstream element-binding protein
PB.12728	PuSMRT_PB.12728.4_transcript1502_f2p0_3721_g1,PuSMRT_PB.12728.1_transcript204_f2p0_5216_g1/PuSMRT_PB.12728.2_transcript3032_f2p0_3214_g1/PuSMRT_PB.12728.3_transcript143_f2p0_5483_g1	-	0,1^2-	Retained intron(RI)	gi|743917052|ref|XM_011004205.1|	4908	0	PREDICTED: Populus euphratica putative 1-phosphatidylinositol-3-phosphate 5-kinase FAB1D (LOC105109482), transcript variant X1, mRNA	Potri.019G087000	gi|743917053|ref|XP_011002507.1|	7934	0	PREDICTED: putative 1-phosphatidylinositol-3-phosphate 5-kinase FAB1D [Populus euphratica]	Q9XID0	1187	0	Putative 1-phosphatidylinositol-3-phosphate 5-kinase FAB1D	YFR019w_3	240	3e-65	COG5253	pfam01504	PIP5K	Phosphatidylinositol-4-phosphate 5-Kinase. This family contains a region from the common kinase core found in the type I phosphatidylinositol-4-phosphate 5-kinase (PIP5K) family as described in. The family consists of various type I, II and III PIP5K enzymes. PIP5K catalyses the formation of phosphoinositol-4,5-bisphosphate via the phosphorylation of phosphatidylinositol-4-phosphate a precursor i…	.	.	GO:0000285|1-phosphatidylinositol-3-phosphate 5-kinase activity;GO:0005524|ATP binding;	K00921	PIKFYVE, FAB1; 1-phosphatidylinositol-3-phosphate 5-kinase [EC:2.7.1.150]
PB.12746	PuSMRT_PB.12746.1_transcript7310_f5p0_2321_g1,PuSMRT_PB.12746.2_transcript9740_f2p0_2015_g1	+	1-,2-	Alternative 3' splice site(A3SS)	gi|566242512|ref|XM_002325566.2|	2336	0	Populus trichocarpa calmodulin-binding family protein (POPTR_0019s12550g) mRNA, complete cds	Potri.019G095700	gi|566242513|ref|XP_002325602.2|	2329	0	calmodulin-binding family protein [Populus trichocarpa]	Q8LPG9	362	5e-111	Protein IQ-DOMAIN 14	.	.	.	.	pfam13178	DUF4005	Protein of unknown function (DUF4005). This is a C-terminal region of plant IQ-containing putative calmodulin-binding proteins.	GO:0002495|antigen processing and presentation of peptide antigen via MHC class II;GO:0006955|immune response;GO:0000209|protein polyubiquitination;	GO:0030659|cytoplasmic vesicle membrane;GO:0031901|early endosome membrane;GO:0005789|endoplasmic reticulum membrane;GO:0005768|endosome;GO:0016021|integral component of membrane;GO:0031902|late endosome membrane;GO:0005765|lysosomal membrane;GO:0005764|lysosome;GO:0005886|plasma membrane;GO:0032588|trans-Golgi network membrane;	GO:0016874|ligase activity;GO:0042287|MHC protein binding;GO:0061630|ubiquitin protein ligase activity;GO:0004842|ubiquitin-protein transferase activity;GO:0008270|zinc ion binding;	.	.
PB.12810	PuSMRT_PB.12810.2_transcript23379_f31p0_1004_g1/PuSMRT_PB.12810.4_transcript25827_f2p0_924_g1,PuSMRT_PB.12810.3_transcript26477_f2p0_908_g1	-	0,1^2-	Retained intron(RI)	gi|566245797|ref|XM_002325597.2|	618	0	Populus trichocarpa ubiquitin conjugating-like enzyme family protein (POPTR_0019s15200g) mRNA, complete cds	Potri.019G131400	gi|763772009|gb|KJB39132.1|	544	1e-61	hypothetical protein B456_007G025200 [Gossypium raimondii]	P35135	212	2e-62	Ubiquitin-conjugating enzyme E2-17 kDa	SPBC119.02	182	2e-52	COG5078	pfam00179	UQ_con	Ubiquitin-conjugating enzyme. Proteins destined for proteasome-mediated degradation may be ubiquitinated. Ubiquitination follows conjugation of ubiquitin to a conserved cysteine residue of UBC homologues. TSG101 is one of several UBC homologues that lacks this active site cysteine.	GO:0016567|protein ubiquitination;	.	GO:0005524|ATP binding;GO:0016740|transferase activity;	.	.
PB.12873	PuSMRT_PB.12873.2_transcript23129_f2p0_1065_g1,PuSMRT_PB.12873.1_transcript21763_f2p0_1125_g1	+	0,1^2-	Retained intron(RI)	gi|566160331|ref|XM_002303151.2|	901	0	Populus trichocarpa hypothetical protein (POPTR_0003s01790g) mRNA, complete cds	Potri.T125500	gi|566160332|ref|XP_002303187.2|	1139	5e-154	hypothetical protein POPTR_0003s01790g [Populus trichocarpa]	.	.	.	.	.	.	.	.	pfam14750	INTS2	Integrator complex subunit 2. This family of proteins are subunits of the integrator complex involved in snRNA transcription and processing.	.	.	.	.	.
PB.12874	PuSMRT_PB.12874.2_transcript27447_f3p0_858_g1,PuSMRT_PB.12874.1_transcript26681_f2p0_884_g1/PuSMRT_PB.12874.3_transcript21724_f3p0_1130_g1	-	1-,2-	Alternative 3' splice site(A3SS)	gi|743921818|ref|XM_011006676.1|	1896	0	PREDICTED: Populus euphratica serine/arginine-rich splicing factor SC35-like (LOC105111351), transcript variant X2, mRNA	Potri.T125700	gi|566160338|ref|XP_006385228.1|	582	3e-66	hypothetical protein POPTR_0003s01810g [Populus trichocarpa]	Q9FMG4	207	4e-59	Serine/arginine-rich splicing factor SC35	ssr1480	60.1	6e-10	COG0724	pfam00076	RRM_1	RNA recognition motif. (a.k.a. RRM, RBD, or RNP domain). The RRM motif is probably diagnostic of an RNA binding protein. RRMs are found in a variety of RNA binding proteins, including various hnRNP proteins, proteins implicated in regulation of alternative splicing, and protein components of snRNPs. The motif also appears in a few single stranded DNA binding proteins. The RRM structure consists o…	GO:0000398|mRNA splicing, via spliceosome;GO:0008380|RNA splicing;	GO:0005829|cytosol;GO:0016020|membrane;GO:0016607|nuclear speck;GO:0005681|spliceosomal complex;	GO:0000166|nucleotide binding;GO:0003723|RNA binding;	K12891	SFRS2; splicing factor, arginine/serine-rich 2
PB.1296	PuSMRT_PB.1296.3_transcript16540_f2p0_1435_g1,PuSMRT_PB.1296.1_transcript7883_f40p0_2142_g1/PuSMRT_PB.1296.2_transcript15435_f2p0_1519_g1/PuSMRT_PB.1296.4_transcript18119_f2p0_1377_g1/PuSMRT_PB.1296.5_transcript23301_f4p0_1031_g1	+	1^,2^	Alternative 5' splice site(A5SS)	gi|743912704|ref|XM_011001939.1|	993	0	PREDICTED: Populus euphratica uncharacterized LOC105107868 (LOC105107868), mRNA	Potri.001G375500	gi|743912705|ref|XP_011000241.1|	1260	0	PREDICTED: uncharacterized protein LOC105107868 [Populus euphratica]	.	.	.	.	.	.	.	.	pfam01699	Na_Ca_ex	Sodium/calcium exchanger protein. This is a family of sodium/calcium exchanger integral membrane proteins. This family covers the integral membrane regions of the proteins. Sodium/calcium exchangers regulate intracellular Ca2+ concentrations in many cells; cardiac myocytes, epithelial cells, neurons retinal rod photoreceptors and smooth muscle cells. Ca2+ is moved into or out of the cytosol depen…	.	.	.	.	.
PB.12967	PuSMRT_PB.12967.1_transcript12552_f2p0_1742_g1,PuSMRT_PB.12967.2_transcript11430_f12p0_1785_g1/PuSMRT_PB.12967.3_transcript20944_f3p0_1171_g1	+	1^,2^	Alternative 5' splice site(A5SS)	gi|566210669|ref|XM_006372352.1|	1270	0	Populus trichocarpa isocitrate dehydrogenase family protein (POPTR_0017s01410g) mRNA, complete cds	Potri.T059000	gi|743888315|ref|XP_011038412.1|	1796	0	PREDICTED: isocitrate dehydrogenase [NADP]-like isoform X2 [Populus euphratica]	P50218	655	0	Isocitrate dehydrogenase [NADP]	BMEI0791	470	6e-159	COG0538	pfam00180	Iso_dh	Isocitrate/isopropylmalate dehydrogenase.	GO:0006097|glyoxylate cycle;GO:0006102|isocitrate metabolic process;GO:0006099|tricarboxylic acid cycle;	GO:0005737|cytoplasm;	GO:0004450|isocitrate dehydrogenase (NADP+) activity;GO:0000287|magnesium ion binding;GO:0051287|NAD binding;	.	.
PB.13004	PuSMRT_PB.13004.2_transcript18166_f9p0_1295_g1,PuSMRT_PB.13004.1_transcript19614_f2p0_1260_g1	+	0,1^2-	Retained intron(RI)	gi|566210415|ref|XM_006372234.1|	1328	0	Populus trichocarpa hypothetical protein (POPTR_0017s00310g) mRNA, complete cds	Potri.T076700	gi|566210416|ref|XP_006372296.1|	1837	0	hypothetical protein POPTR_0017s00310g [Populus trichocarpa]	Q9SLN8	555	0	2-alkenal reductase (NADP(+)-dependent)	SA1989	261	7e-82	COG2130	pfam00107	ADH_zinc_N	Zinc-binding dehydrogenase.	.	.	GO:0016491|oxidoreductase activity;GO:0008270|zinc ion binding;	.	.
PB.1361	PuSMRT_PB.1361.2_transcript7702_f2p0_2264_g1,PuSMRT_PB.1361.1_transcript11178_f2p0_1884_g1	+	0,1^2-	Retained intron(RI)	gi|566153979|ref|XM_006370183.1|	1788	0	Populus trichocarpa hypothetical protein (POPTR_0001s40980g) mRNA, complete cds	Potri.001G399000	gi|566153980|ref|XP_006370245.1|	2590	0	hypothetical protein POPTR_0001s40980g [Populus trichocarpa]	B9N1F9	1003	0	Probable bifunctional methylthioribulose-1-phosphate dehydratase/enolase-phosphatase E1	aq_1977	176	8e-50	COG4229	pfam00596	Aldolase_II	Class II Aldolase and Adducin N-terminal domain. This family includes class II aldolases and adducins which have not been ascribed any enzymatic function.	GO:0019509|L-methionine biosynthetic process from methylthioadenosine;GO:0019284|L-methionine biosynthetic process from S-adenosylmethionine;	GO:0005737|cytoplasm;	GO:0043715|2,3-diketo-5-methylthiopentyl-1-phosphate enolase activity;GO:0043716|2-hydroxy-3-keto-5-methylthiopentenyl-1-phosphate phosphatase activity;GO:0043874|acireductone synthase activity;GO:0000287|magnesium ion binding;GO:0046570|methylthioribulose 1-phosphate dehydratase activity;GO:0008270|zinc ion binding;	K16054	DEP1; methylthioribulose 1-phosphate dehydratase / enolase-phosphatase E1 [EC:4.2.1.109 3.1.3.77]
PB.1401	PuSMRT_PB.1401.2_transcript3976_f2p0_2970_g1,PuSMRT_PB.1401.1_transcript4137_f4p0_2883_g1	+	0,1^2-	Retained intron(RI)	gi|566154289|ref|XM_006370338.1|	1744	0	Populus trichocarpa hypothetical protein (POPTR_0001s42260g) mRNA, complete cds	Potri.001G412000	gi|566154290|ref|XP_006370400.1|	4195	0	hypothetical protein POPTR_0001s42260g [Populus trichocarpa]	O81832	792	0	G-type lectin S-receptor-like serine/threonine-protein kinase At4g27290	BH2504_1	94	1e-19	COG0515	pfam07714	Pkinase_Tyr	Protein tyrosine kinase.	GO:0006952|defense response;GO:0006468|protein phosphorylation;GO:0048544|recognition of pollen;	GO:0005886|plasma membrane;GO:0009506|plasmodesma;	GO:0005524|ATP binding;GO:0005516|calmodulin binding;GO:0030246|carbohydrate binding;GO:0004674|protein serine/threonine kinase activity;	.	.
PB.1413	PuSMRT_PB.1413.2_transcript32629_f2p0_614_g1,PuSMRT_PB.1413.1_transcript32592_f17p0_586_g1	+	1-,2-	Alternative 3' splice site(A3SS)	gi|566154775|ref|XM_006370548.1|	350	0	Populus trichocarpa hypothetical protein (POPTR_0001s44220g) mRNA, complete cds	Potri.001G416500	gi|118481316|gb|ABK92601.1|	408	1e-63	unknown [Populus trichocarpa]	Q8LDI5	100	6e-25	Thioredoxin-like protein CXXS1	SPAC7D4.07c	41.2	3e-09	COG0526	pfam00085	Thioredoxin	Thioredoxin. Thioredoxins are small enzymes that participate in redox reactions, via the reversible oxidation of an active centre disulfide bond. Some members with only the active site are not separated from the noise.	GO:0045454|cell redox homeostasis;GO:0034599|cellular response to oxidative stress;GO:0006662|glycerol ether metabolic process;GO:0055114|oxidation-reduction process;GO:0000103|sulfate assimilation;	GO:0005829|cytosol;GO:0005886|plasma membrane;	GO:0016671|oxidoreductase activity, acting on a sulfur group of donors, disulfide as acceptor;GO:0003756|protein disulfide isomerase activity;GO:0015035|protein disulfide oxidoreductase activity;	K03671	trxA; thioredoxin 1
PB.1417	PuSMRT_PB.1417.1_transcript9989_f2p0_1979_g1,PuSMRT_PB.1417.2_transcript16146_f577p0_1426_g1	+	0,1^2-	Retained intron(RI)	gi|566154825|ref|XM_006370573.1|	1477	0	Populus trichocarpa hypothetical protein (POPTR_0001s44440g) mRNA, complete cds	Potri.001G418500	gi|731417327|ref|XP_002267206.2|	1972	0	PREDICTED: polyubiquitin-C-like [Vitis vinifera]	P69322	754	0	Polyubiquitin	.	.	.	.	pfam00240	ubiquitin	Ubiquitin family. This family contains a number of ubiquitin-like proteins: SUMO (smt3 homologue) Nedd8, Elongin B, Rub1, and Parkin. A number of them are thought to carry a distinctive five-residue motif termed the proteasome-interacting motif (PIM), which may have a biologically significant role in protein delivery to proteasomes and recruitment of proteasomes to transcription sites.	.	GO:0005737|cytoplasm;GO:0005634|nucleus;	.	.	.
PB.1417	PuSMRT_PB.1417.2_transcript16146_f577p0_1426_g1,PuSMRT_PB.1417.4_transcript24860_f2p0_971_g1	+	0,1^2-	Retained intron(RI)	gi|566154825|ref|XM_006370573.1|	1477	0	Populus trichocarpa hypothetical protein (POPTR_0001s44440g) mRNA, complete cds	Potri.001G418500	gi|731417327|ref|XP_002267206.2|	1972	0	PREDICTED: polyubiquitin-C-like [Vitis vinifera]	P69322	754	0	Polyubiquitin	.	.	.	.	pfam00240	ubiquitin	Ubiquitin family. This family contains a number of ubiquitin-like proteins: SUMO (smt3 homologue) Nedd8, Elongin B, Rub1, and Parkin. A number of them are thought to carry a distinctive five-residue motif termed the proteasome-interacting motif (PIM), which may have a biologically significant role in protein delivery to proteasomes and recruitment of proteasomes to transcription sites.	.	GO:0005737|cytoplasm;GO:0005634|nucleus;	.	.	.
PB.1475	PuSMRT_PB.1475.2_transcript3467_f6p0_3109_g1,PuSMRT_PB.1475.1_transcript3321_f2p0_3181_g1	-	1-,2-	Alternative 3' splice site(A3SS)	gi|743887050|ref|XM_011039718.1|	2916	0	PREDICTED: Populus euphratica uncharacterized LOC105135048 (LOC105135048), transcript variant X1, mRNA	Potri.001G452300	gi|566155080|ref|XP_002300521.2|	4177	0	hypothetical protein POPTR_0001s45660g [Populus trichocarpa]	.	.	.	.	.	.	.	.	pfam03800	Nuf2	Nuf2 family. Members of this family are components of the mitotic spindle. It has been shown that Nuf2 from yeast is part of a complex called the Ndc80p complex. This complex is thought to bind to the microtubules of the spindle. An arabidopsis protein has been included in this family that has previously not been identified as a member of this family. The match is not strong, but in common with o…	.	.	.	.	.
PB.1477	PuSMRT_PB.1477.2_transcript2078_f2p0_3511_g1,PuSMRT_PB.1477.1_transcript1805_f5p0_3581_g1	+	0,1-2^	Skipped exon(SE)	gi|47900629|gb|AC149298.1|	227	1e-114	Populus trichocarpa clone Pop1-021H24, complete sequence	Potri.001G453300	.	.	.	.	.	.	.	.	.	.	.	.	pfam03254	XG_FTase	Xyloglucan fucosyltransferase. Plant cell walls are crucial for development, signal transduction, and disease resistance in plants. Cell walls are made of cellulose, hemicelluloses, and pectins. Xyloglucan (XG), the principal load-bearing hemicellulose of dicotyledonous plants, has a terminal fucosyl residue. This fucosyltransferase adds this residue.	.	.	.	.	.
PB.1532	PuSMRT_PB.1532.3_transcript10730_f2p0_1906_g1,PuSMRT_PB.1532.1_transcript9605_f2p0_2036_g1/PuSMRT_PB.1532.2_transcript9838_f2p0_1948_g1	+	1-,2-	Alternative 3' splice site(A3SS)	gi|743893065|ref|XM_011041537.1|	1654	0	PREDICTED: Populus euphratica vacuolar cation/proton exchanger 2-like (LOC105136267), transcript variant X2, mRNA	Potri.001G469800	gi|743893062|ref|XP_011039838.1|	2236	0	PREDICTED: vacuolar cation/proton exchanger 2-like isoform X1 [Populus euphratica]	Q8L783	630	0	Vacuolar cation/proton exchanger 5	all0626	259	4e-78	COG0387	pfam01699	Na_Ca_ex	Sodium/calcium exchanger protein. This is a family of sodium/calcium exchanger integral membrane proteins. This family covers the integral membrane regions of the proteins. Sodium/calcium exchangers regulate intracellular Ca2+ concentrations in many cells; cardiac myocytes, epithelial cells, neurons retinal rod photoreceptors and smooth muscle cells. Ca2+ is moved into or out of the cytosol depen…	.	GO:0016021|integral component of membrane;GO:0005774|vacuolar membrane;	GO:0015369|calcium:proton antiporter activity;	K07300	chaA, CAX; Ca2+:H+ antiporter
PB.1548	PuSMRT_PB.1548.1_transcript3334_f3p0_3105_g1/PuSMRT_PB.1548.2_transcript4376_f2p0_2859_g1,PuSMRT_PB.1548.3_transcript4512_f2p0_2828_g1	-	1-,2-	Alternative 3' splice site(A3SS)	gi|566155412|ref|XM_006370734.1|	2489	0	Populus trichocarpa WRKY transcription factor 34 family protein (POPTR_0001s47670g) mRNA, complete cds	Potri.001G472800	gi|566155413|ref|XP_006370796.1|	3849	0	WRKY transcription factor 34 family protein [Populus trichocarpa]	Q9FG77	577	0	Probable WRKY transcription factor 2	.	.	.	.	pfam03106	WRKY	WRKY DNA -binding domain.	GO:0030010|establishment of cell polarity;GO:0009942|longitudinal axis specification;GO:0009555|pollen development;GO:0006355|regulation of transcription, DNA-templated;GO:0006351|transcription, DNA-templated;	GO:0005634|nucleus;	GO:0043565|sequence-specific DNA binding;GO:0003700|transcription factor activity, sequence-specific DNA binding;	K18835	WRKY2; WRKY transcription factor 2
PB.1554	PuSMRT_PB.1554.3_transcript12233_f2p0_1768_g1,PuSMRT_PB.1554.1_transcript13418_f3p0_1711_g1/PuSMRT_PB.1554.2_transcript15452_f2p0_1542_g1/PuSMRT_PB.1554.4_transcript12954_f4p0_1704_g1/PuSMRT_PB.1554.5_transcript25231_f2p0_963_g1	+	0,1^2-	Retained intron(RI)	gi|566155467|ref|XM_006386054.1|	1965	0	Populus trichocarpa hypothetical protein (POPTR_0002s00230g) mRNA, complete cds	Potri.002G000300	gi|566155466|ref|XP_002300601.2|	2145	0	hypothetical protein POPTR_0002s00230g [Populus trichocarpa]	Q8GYX8	568	0	Chaperone protein dnaJ 10	YER048c	140	6e-35	COG2214	pfam14308	DnaJ-X	X-domain of DnaJ-containing. IN certain plant and yeast proteins, the DnaJ-1 proteins have a three-domain structure. The x-domain lies between the N-terminal DnaJ and the C-terminal Z domains. The exact function is not known.	GO:0043132|NAD transport;GO:0044375|regulation of peroxisome size;GO:0006412|translation;	GO:0046861|glyoxysomal membrane;GO:0009514|glyoxysome;GO:0016021|integral component of membrane;GO:0005777|peroxisome;GO:0005774|vacuolar membrane;	GO:0015297|antiporter activity;GO:0003735|structural constituent of ribosome;	.	.
PB.1562	PuSMRT_PB.1562.2_transcript693_f4p0_4246_g1/PuSMRT_PB.1562.5_transcript597_f2p0_4220_g1,PuSMRT_PB.1562.1_transcript1211_f5p0_3881_g1/PuSMRT_PB.1562.3_transcript945_f5p0_4005_g1/PuSMRT_PB.1562.4_transcript909_f4p0_4053_g1	-	1-,2-	Alternative 3' splice site(A3SS)	gi|743874840|ref|XM_011036470.1|	3249	0	PREDICTED: Populus euphratica squamosa promoter-binding-like protein 14 (LOC105132784), transcript variant X2, mRNA	Potri.002G002400	gi|743874841|ref|XP_011034772.1|	4432	0	PREDICTED: squamosa promoter-binding-like protein 14 isoform X2 [Populus euphratica]	Q8RY95	685	0	Squamosa promoter-binding-like protein 14	.	.	.	.	pfam03110	SBP	SBP domain. SBP domains (for SQUAMOSA-pROMOTER BINDING PROTEIN) are found in plant proteins. It is a sequence specific DNA-binding domain. Members of family probably function as transcription factors involved in the control of early flower development. The domain contains 10 conserved cysteine and histidine residues that probably are zinc ligands.	GO:0042742|defense response to bacterium;GO:0045893|positive regulation of transcription, DNA-templated;GO:0006355|regulation of transcription, DNA-templated;GO:0006351|transcription, DNA-templated;	GO:0005737|cytoplasm;GO:0005634|nucleus;GO:0005886|plasma membrane;	GO:0003677|DNA binding;GO:0046872|metal ion binding;GO:0003700|transcription factor activity, sequence-specific DNA binding;	.	.
PB.1568	PuSMRT_PB.1568.1_transcript8146_f3p0_2206_g1,PuSMRT_PB.1568.2_transcript10603_f6p0_1903_g1	+	0,1^2-	Retained intron(RI)	gi|566155521|ref|XM_002300582.2|	2094	0	Populus trichocarpa hypothetical protein (POPTR_0002s00550g) mRNA, complete cds	Potri.002G003700	gi|566155522|ref|XP_002300618.2|	2324	0	hypothetical protein POPTR_0002s00550g [Populus trichocarpa]	Q0WNR6	451	2e-150	AT-rich interactive domain-containing protein 5	.	.	.	.	pfam01388	ARID	ARID/BRIGHT DNA binding domain. This domain is know as ARID for AT-Rich Interaction Domain, and also known as the BRIGHT domain.	.	GO:0005634|nucleus;	GO:0000977|RNA polymerase II regulatory region sequence-specific DNA binding;GO:0001228|transcriptional activator activity, RNA polymerase II transcription regulatory region sequence-specific binding;	.	.
PB.1568	PuSMRT_PB.1568.2_transcript10603_f6p0_1903_g1,PuSMRT_PB.1568.1_transcript8146_f3p0_2206_g1	+	1-,2-	Alternative 3' splice site(A3SS)	gi|566155521|ref|XM_002300582.2|	2094	0	Populus trichocarpa hypothetical protein (POPTR_0002s00550g) mRNA, complete cds	Potri.002G003700	gi|566155522|ref|XP_002300618.2|	2324	0	hypothetical protein POPTR_0002s00550g [Populus trichocarpa]	Q0WNR6	451	2e-150	AT-rich interactive domain-containing protein 5	.	.	.	.	pfam01388	ARID	ARID/BRIGHT DNA binding domain. This domain is know as ARID for AT-Rich Interaction Domain, and also known as the BRIGHT domain.	.	GO:0005634|nucleus;	GO:0000977|RNA polymerase II regulatory region sequence-specific DNA binding;GO:0001228|transcriptional activator activity, RNA polymerase II transcription regulatory region sequence-specific binding;	.	.
PB.1572	PuSMRT_PB.1572.1_transcript13201_f2p0_1713_g1,PuSMRT_PB.1572.3_transcript18200_f3p0_1328_g1	+	0,1-2^	Skipped exon(SE)	gi|123686056|emb|AM434559.1|	75	2e-29	Vitis vinifera contig VV78X092169.11, whole genome shotgun sequence	Potri.002G004700	.	.	.	.	.	.	.	.	.	.	.	.	pfam11023	DUF2614	Protein of unknown function (DUF2614). This is a family of proteins conserved in the Bacillaceae family. Some members are annotated as being protein YgzB. The function is not known.	.	.	.	.	.
PB.1572	PuSMRT_PB.1572.2_transcript6975_f2p0_2384_g1,PuSMRT_PB.1572.1_transcript13201_f2p0_1713_g1	+	0,1^2-	Retained intron(RI)	gi|123686056|emb|AM434559.1|	75	2e-29	Vitis vinifera contig VV78X092169.11, whole genome shotgun sequence	Potri.002G004700	.	.	.	.	.	.	.	.	.	.	.	.	pfam11023	DUF2614	Protein of unknown function (DUF2614). This is a family of proteins conserved in the Bacillaceae family. Some members are annotated as being protein YgzB. The function is not known.	.	.	.	.	.
PB.1577	PuSMRT_PB.1577.1_transcript4242_f2p0_2906_g1,PuSMRT_PB.1577.2_transcript4960_f16p0_2640_g1/PuSMRT_PB.1577.3_transcript5052_f3p0_2745_g1	+	0,1^2-	Retained intron(RI)	gi|743875054|ref|XM_011036524.1|	2617	0	PREDICTED: Populus euphratica monosaccharide-sensing protein 2-like (LOC105132819), transcript variant X1, mRNA	Potri.002G006200	gi|224061849|ref|XP_002300629.1|	3491	0	hypothetical protein POPTR_0002s00760g [Populus trichocarpa]	Q8LPQ8	885	0	Monosaccharide-sensing protein 2	.	.	.	.	pfam00083	Sugar_tr	Sugar (and other) transporter.	GO:0046323|glucose import;GO:0035428|hexose transmembrane transport;	GO:0005794|Golgi apparatus;GO:0005887|integral component of plasma membrane;GO:0005774|vacuolar membrane;GO:0005773|vacuole;	GO:0005355|glucose transmembrane transporter activity;GO:0005351|sugar:proton symporter activity;	.	.
PB.1578	PuSMRT_PB.1578.2_transcript8474_f2p0_2157_g1,PuSMRT_PB.1578.1_transcript8642_f22p0_2065_g1	+	0,1^2-	Retained intron(RI)	gi|118483702|gb|EF145601.1|	2075	0	Populus trichocarpa clone WS01126_N03 unknown mRNA	Potri.002G006600	gi|224061851|ref|XP_002300630.1|	3065	0	ribophorin 1 family protein [Populus trichocarpa]	Q9SFX3	817	0	Dolichyl-diphosphooligosaccharide--protein glycosyltransferase subunit 1A	.	.	.	.	pfam04597	Ribophorin_I	Ribophorin I. Ribophorin I is an essential subunit of oligosaccharyltransferase (OST), which is also known as Dolichyl-diphosphooligosaccharide--protein glycosyltransferase, (EC:2.4.1.119). OST catalyses the transfer of an oligosaccharide from dolichol pyrophosphate to selected asparagine residues of nascent polypeptides as they are translocated into the lumen of the rough endoplasmic reticulum. …	GO:0018279|protein N-linked glycosylation via asparagine;	GO:0005783|endoplasmic reticulum;GO:0016021|integral component of membrane;GO:0016020|membrane;GO:0008250|oligosaccharyltransferase complex;	GO:0004579|dolichyl-diphosphooligosaccharide-protein glycotransferase activity;	K12666	OST1, RPN1; oligosaccharyltransferase complex subunit alpha (ribophorin I)
PB.1582	PuSMRT_PB.1582.2_transcript773_f2p0_4180_g1,PuSMRT_PB.1582.1_transcript1379_f16p0_3725_g1/PuSMRT_PB.1582.4_transcript2203_f4p0_3466_g1	-	1^,2^	Alternative 5' splice site(A5SS)	gi|743875151|ref|XM_011036551.1|	3412	0	PREDICTED: Populus euphratica epidermal growth factor receptor substrate 15-like 1 (LOC105132837), transcript variant X1, mRNA	Potri.002G008600	gi|743875152|ref|XP_011034853.1|	5120	0	PREDICTED: epidermal growth factor receptor substrate 15-like 1 isoform X1 [Populus euphratica]	B3LF48	82.8	9e-15	EH domain-containing protein 2	.	.	.	.	pfam13254	DUF4045	Domain of unknown function (DUF4045). This presumed domain is functionally uncharacterized. This domain family is found in bacteria and eukaryotes, and is typically between 384 and 430 amino acids in length.	GO:0006897|endocytosis;GO:0051260|protein homooligomerization;GO:0032956|regulation of actin cytoskeleton organization;	GO:0005737|cytoplasm;GO:0010008|endosome membrane;GO:0043231|intracellular membrane-bounded organelle;GO:0016020|membrane;GO:0005634|nucleus;GO:0005886|plasma membrane;GO:0009506|plasmodesma;	GO:0005509|calcium ion binding;GO:0005525|GTP binding;GO:0016787|hydrolase activity;	K12483	EHD1; EH domain-containing protein 1
PB.1582	PuSMRT_PB.1582.2_transcript773_f2p0_4180_g1,PuSMRT_PB.1582.1_transcript1379_f16p0_3725_g1/PuSMRT_PB.1582.4_transcript2203_f4p0_3466_g1	-	0,1^2-	Retained intron(RI)	gi|743875151|ref|XM_011036551.1|	3412	0	PREDICTED: Populus euphratica epidermal growth factor receptor substrate 15-like 1 (LOC105132837), transcript variant X1, mRNA	Potri.002G008600	gi|743875152|ref|XP_011034853.1|	5120	0	PREDICTED: epidermal growth factor receptor substrate 15-like 1 isoform X1 [Populus euphratica]	B3LF48	82.8	9e-15	EH domain-containing protein 2	.	.	.	.	pfam13254	DUF4045	Domain of unknown function (DUF4045). This presumed domain is functionally uncharacterized. This domain family is found in bacteria and eukaryotes, and is typically between 384 and 430 amino acids in length.	GO:0006897|endocytosis;GO:0051260|protein homooligomerization;GO:0032956|regulation of actin cytoskeleton organization;	GO:0005737|cytoplasm;GO:0010008|endosome membrane;GO:0043231|intracellular membrane-bounded organelle;GO:0016020|membrane;GO:0005634|nucleus;GO:0005886|plasma membrane;GO:0009506|plasmodesma;	GO:0005509|calcium ion binding;GO:0005525|GTP binding;GO:0016787|hydrolase activity;	K12483	EHD1; EH domain-containing protein 1
PB.1584	PuSMRT_PB.1584.2_transcript26071_f3p0_901_g1,PuSMRT_PB.1584.1_transcript26677_f4p0_813_g1	-	0,1^2-	Retained intron(RI)	gi|566155605|ref|XM_006386073.1|	852	0	Populus trichocarpa hypothetical protein (POPTR_0002s01000g) mRNA, complete cds	Potri.002G009000	gi|224065681|ref|XP_002301918.1|	485	6e-57	HMG 1 family protein [Populus trichocarpa]	P93047	153	8e-44	High mobility group B protein 3	SPAC57A10.09c	60.1	2e-10	COG5648	pfam00505	HMG_box	HMG (high mobility group) box.	GO:0006333|chromatin assembly or disassembly;	GO:0000785|chromatin;GO:0005829|cytosol;GO:0005634|nucleus;	GO:0003682|chromatin binding;GO:0003677|DNA binding;GO:0030527|structural constituent of chromatin;GO:0003700|transcription factor activity, sequence-specific DNA binding;	.	.
PB.1588	PuSMRT_PB.1588.1_transcript3495_f2p0_3101_g1,PuSMRT_PB.1588.2_transcript5684_f6p0_2561_g1	+	0,1^2-	Retained intron(RI)	gi|743875251|ref|XM_011036579.1|	2867	0	PREDICTED: Populus euphratica BTB/POZ domain-containing protein At2g30600-like (LOC105132850), transcript variant X3, mRNA	Potri.002G010100	gi|224061877|ref|XP_002300643.1|	4076	0	BTB/POZ domain-containing family protein [Populus trichocarpa]	Q8LEV3	1110	0	BTB/POZ domain-containing protein At2g30600	.	.	.	.	pfam12248	Methyltransf_FA	Farnesoic acid 0-methyl transferase. This domain family is found in bacteria and eukaryotes, and is approximately 110 amino acids in length.Farnesoic acid O-methyl transferase (FAMeT) is the enzyme that catalyses the formation of methyl farnesoate (MF) from farnesoic acid (FA) in the biosynthetic pathway of juvenile hormone (JH).	GO:0043161|proteasome-mediated ubiquitin-dependent protein catabolic process;GO:0042787|protein ubiquitination involved in ubiquitin-dependent protein catabolic process;GO:0030162|regulation of proteolysis;	GO:0005737|cytoplasm;GO:0019005|SCF ubiquitin ligase complex;	GO:0031625|ubiquitin protein ligase binding;	.	.
PB.1689	PuSMRT_PB.1689.2_transcript5528_f2p0_2639_g1,PuSMRT_PB.1689.1_transcript5523_f4p0_2618_g1/PuSMRT_PB.1689.3_transcript6592_f36p0_2416_g1	+	0,1^2-	Retained intron(RI)	gi|566156087|ref|XM_002300735.2|	2925	0	Populus trichocarpa ribophorin 2 family protein (POPTR_0002s03790g) mRNA, complete cds	Potri.002G036600	gi|224062133|ref|XP_002300771.1|	3276	0	ribophorin 2 family protein [Populus trichocarpa]	Q93Z16	806	0	Dolichyl-diphosphooligosaccharide--protein glycosyltransferase subunit 2	.	.	.	.	pfam05817	Ribophorin_II	Oligosaccharyltransferase subunit Ribophorin II. This family contains eukaryotic Ribophorin II (RPN2) proteins. The mammalian oligosaccharyltransferase (OST) is a protein complex that effects the cotranslational N-glycosylation of newly synthesized polypeptides, and is composed of the following proteins: ribophorins I and II (RI and RII), OST48, and Dadl, N33/IAP, OST4, STT3. The family also incl…	GO:0006487|protein N-linked glycosylation;GO:0009409|response to cold;	GO:0005783|endoplasmic reticulum;GO:0005794|Golgi apparatus;GO:0016021|integral component of membrane;GO:0016020|membrane;GO:0005739|mitochondrion;GO:0008250|oligosaccharyltransferase complex;GO:0009505|plant-type cell wall;GO:0005886|plasma membrane;GO:0009506|plasmodesma;GO:0005774|vacuolar membrane;	GO:0016757|transferase activity, transferring glycosyl groups;	K12667	SWP1, RPN2; oligosaccharyltransferase complex subunit delta (ribophorin II)
PB.1703	PuSMRT_PB.1703.1_transcript20897_f3p0_1176_g1,PuSMRT_PB.1703.2_transcript24106_f2p0_998_g1	+	1-,2-	Alternative 3' splice site(A3SS)	gi|566156191|ref|XM_002300756.2|	977	0	Populus trichocarpa hypothetical protein (POPTR_0002s04370g) mRNA, complete cds	Potri.002G042600	gi|566156192|ref|XP_002300792.2|	1072	2e-139	hypothetical protein POPTR_0002s04370g [Populus trichocarpa]	Q54F15	251	3e-76	Iron-sulfur protein NUBPL	mlr5402	242	2e-72	COG0489	pfam10609	ParA	ParA/MinD ATPase like. This family contains ATPases involved in plasmid partitioning. It also contains the cytosolic Fe-S cluster assembling factor NBP35 which is required for biogenesis and export of both ribosomal subunits.	.	GO:0005739|mitochondrion;	GO:0005524|ATP binding;GO:0051536|iron-sulfur cluster binding;GO:0046872|metal ion binding;	K03593	mrp, NUBPL; ATP-binding protein involved in chromosome partitioning
PB.1729	PuSMRT_PB.1729.1_transcript22188_f3p0_1115_g1,PuSMRT_PB.1729.2_transcript21959_f4p0_1112_g1/PuSMRT_PB.1729.3_transcript25311_f4p0_941_g1	+	1-,2-	Alternative 3' splice site(A3SS)	gi|743840145|ref|XM_011027827.1|	1255	0	PREDICTED: Populus euphratica TP53-regulating kinase-like (LOC105126824), transcript variant X2, mRNA	Potri.002G049900	gi|224062379|ref|XP_002300825.1|	1034	2e-134	hypothetical protein POPTR_0002s05080g [Populus trichocarpa]	Q54W07	178	1e-49	EKC/KEOPS complex subunit bud32	SPAP27G11.07c	146	4e-39	COG3642	pfam01163	RIO1	RIO1 family. This is a family of atypical serine kinases which are found in archaea, bacteria and eukaryotes. Activity of Rio1 is vital in Saccharomyces cerevisiae for the processing of ribosomal RNA, as well as for proper cell cycle progression and chromosome maintenance. The structure of RIO1 has been determined.	GO:0006468|protein phosphorylation;GO:0008033|tRNA processing;GO:0070525|tRNA threonylcarbamoyladenosine metabolic process;	GO:0005829|cytosol;GO:0000408|EKC/KEOPS complex;GO:0005634|nucleus;	GO:0005524|ATP binding;GO:0016787|hydrolase activity;GO:0004674|protein serine/threonine kinase activity;	K08851	TP53RK, PRPK, BUD32; TP53 regulating kinase and related kinases [EC:2.7.11.1]
PB.1736	PuSMRT_PB.1736.2_transcript193_f2p0_5239_g1,PuSMRT_PB.1736.3_transcript228_f2p0_5151_g1/PuSMRT_PB.1736.5_transcript440_f3p0_4647_g1/PuSMRT_PB.1736.7_transcript319_f4p0_4870_g1	-	0,1^2-	Retained intron(RI)	gi|566156355|ref|XM_006386204.1|	5118	0	Populus trichocarpa hypothetical protein (POPTR_0002s05320g) mRNA, complete cds	Potri.002G052300	gi|566156356|ref|XP_006386266.1|	5326	0	hypothetical protein POPTR_0002s05320g [Populus trichocarpa]	Q94KE2	235	5e-61	Protein TIME FOR COFFEE	.	.	.	.	pfam03073	TspO_MBR	TspO/MBR family. Tryptophan-rich sensory protein (TspO) is an integral membrane protein that acts as a negative regulator of the expression of specific photosynthesis genes in response to oxygen/light. It is involved in the efflux of porphyrin intermediates from the cell. This reduces the activity of coproporphyrinogen III oxidase, which is thought to lead to the accumulation of a putative repres…	GO:0048511|rhythmic process;	GO:0005634|nucleus;	.	.	.
PB.1746	PuSMRT_PB.1746.1_transcript3197_f2p0_3160_g1,PuSMRT_PB.1746.2_transcript5679_f2p0_2597_g1	+	1-,2-	Alternative 3' splice site(A3SS)	gi|566156405|ref|XM_002300818.2|	3125	0	Populus trichocarpa hypothetical protein (POPTR_0002s05590g) mRNA, complete cds	Potri.002G055000	gi|566156406|ref|XP_002300854.2|	4440	0	hypothetical protein POPTR_0002s05590g [Populus trichocarpa]	Q9ZTX8	775	0	Auxin response factor 6	.	.	.	.	pfam06507	Auxin_resp	Auxin response factor. A conserved region of auxin-responsive transcription factors.	GO:0009734|auxin-activated signaling pathway;GO:0009908|flower development;GO:0009733|response to auxin;GO:0006351|transcription, DNA-templated;	GO:0005634|nucleus;	GO:0003677|DNA binding;GO:0003700|transcription factor activity, sequence-specific DNA binding;	.	.
PB.1748	PuSMRT_PB.1748.2_transcript5634_f2p0_2623_g1,PuSMRT_PB.1748.1_transcript7455_f9p0_2305_g1/PuSMRT_PB.1748.3_transcript8626_f4p0_2137_g1	-	0,1^2-	Retained intron(RI)	gi|743840416|ref|XM_011027897.1|	1459	0	PREDICTED: Populus euphratica probable polyamine oxidase 2 (LOC105126880), mRNA	Potri.002G055300	gi|743840417|ref|XP_011026199.1|	2148	0	PREDICTED: probable polyamine oxidase 2 [Populus euphratica]	Q9SKX5	721	0	Probable polyamine oxidase 2	.	.	.	.	pfam01593	Amino_oxidase	Flavin containing amine oxidoreductase. This family consists of various amine oxidases, including maze polyamine oxidase (PAO) and various flavin containing monoamine oxidases (MAO). The aligned region includes the flavin binding site of these enzymes. The family also contains phytoene dehydrogenases and related enzymes. In vertebrates MAO plays an important role regulating the intracellular leve…	GO:0006598|polyamine catabolic process;	GO:0005777|peroxisome;	GO:0046592|polyamine oxidase activity;	K17839	PAO4, PAO3, PAO2; polyamine oxidase [EC:1.5.3.17 1.5.3.-]
PB.1749	PuSMRT_PB.1749.2_transcript6306_f2p0_2512_g1,PuSMRT_PB.1749.1_transcript13046_f2p0_1701_g1/PuSMRT_PB.1749.3_transcript9893_f5p0_1986_g1/PuSMRT_PB.1749.4_transcript6491_f2p0_2461_g1	-	0,1^2-	Retained intron(RI)	gi|566156410|ref|XM_006386214.1|	1734	0	Populus trichocarpa hypothetical protein (POPTR_0002s05630g) mRNA, complete cds	Potri.002G055400	gi|566156411|ref|XP_006386276.1|	2359	0	hypothetical protein POPTR_0002s05630g [Populus trichocarpa]	Q84LH8	169	5e-44	Transcription factor PIF5	.	.	.	.	pfam00010	HLH	Helix-loop-helix DNA-binding domain.	GO:0009693|ethylene biosynthetic process;GO:0009585|red, far-red light phototransduction;GO:0010600|regulation of auxin biosynthetic process;GO:0010928|regulation of auxin mediated signaling pathway;GO:0010244|response to low fluence blue light stimulus by blue low-fluence system;GO:0006351|transcription, DNA-templated;	GO:0005634|nucleus;	GO:0003677|DNA binding;GO:0003700|transcription factor activity, sequence-specific DNA binding;	.	.
PB.1749	PuSMRT_PB.1749.4_transcript6491_f2p0_2461_g1,PuSMRT_PB.1749.2_transcript6306_f2p0_2512_g1/PuSMRT_PB.1749.3_transcript9893_f5p0_1986_g1	-	1-,2-	Alternative 3' splice site(A3SS)	gi|566156410|ref|XM_006386214.1|	1734	0	Populus trichocarpa hypothetical protein (POPTR_0002s05630g) mRNA, complete cds	Potri.002G055400	gi|566156411|ref|XP_006386276.1|	2359	0	hypothetical protein POPTR_0002s05630g [Populus trichocarpa]	Q84LH8	169	5e-44	Transcription factor PIF5	.	.	.	.	pfam00010	HLH	Helix-loop-helix DNA-binding domain.	GO:0009693|ethylene biosynthetic process;GO:0009585|red, far-red light phototransduction;GO:0010600|regulation of auxin biosynthetic process;GO:0010928|regulation of auxin mediated signaling pathway;GO:0010244|response to low fluence blue light stimulus by blue low-fluence system;GO:0006351|transcription, DNA-templated;	GO:0005634|nucleus;	GO:0003677|DNA binding;GO:0003700|transcription factor activity, sequence-specific DNA binding;	.	.
PB.1768	PuSMRT_PB.1768.1_transcript3912_f3p0_2976_g1,PuSMRT_PB.1768.2_transcript4400_f3p0_2861_g1	+	0,1^2-	Retained intron(RI)	gi|566156477|ref|XM_002300842.2|	3087	0	Populus trichocarpa hypothetical protein (POPTR_0002s06020g) mRNA, complete cds	Potri.002G059300	gi|224062715|ref|XP_002300878.1|	4556	0	hypothetical protein POPTR_0002s06020g [Populus trichocarpa]	.	.	.	.	.	.	.	.	pfam06972	DUF1296	Protein of unknown function (DUF1296). This family represents a conserved region approximately 60 residues long within a number of plant proteins of unknown function. Structural modelling suggests this domain may bind nucleic acids.	.	.	.	.	.
PB.1770	PuSMRT_PB.1770.2_transcript2378_f2p0_3405_g1,PuSMRT_PB.1770.1_transcript2411_f2p0_3415_g1	-	0,1^2-	Retained intron(RI)	gi|743840694|ref|XM_011027966.1|	3219	0	PREDICTED: Populus euphratica protein MEI2-like 2 (LOC105126924), transcript variant X2, mRNA	Potri.002G059800	gi|566156486|ref|XP_002302143.2|	4252	0	hypothetical protein POPTR_0002s06070g [Populus trichocarpa]	Q6ZI17	890	0	Protein MEI2-like 2	.	.	.	.	pfam04059	RRM_2	RNA recognition motif 2.	.	.	GO:0000166|nucleotide binding;GO:0003723|RNA binding;	.	.
PB.1785	PuSMRT_PB.1785.4_transcript23198_f2p0_1064_g1,PuSMRT_PB.1785.1_transcript23942_f2p0_1029_g1/PuSMRT_PB.1785.2_transcript22672_f3p0_1112_g1	-	1-,2-	Alternative 3' splice site(A3SS)	gi|566156529|ref|XM_002302118.2|	789	0	Populus trichocarpa hypothetical protein (POPTR_0002s06330g) mRNA, complete cds	Potri.002G062600	gi|566156530|ref|XP_002302154.2|	1234	8e-166	hypothetical protein POPTR_0002s06330g [Populus trichocarpa]	.	.	.	.	.	.	.	.	pfam07343	DUF1475	Protein of unknown function (DUF1475). This family consists of several hypothetical plant proteins of around 250 residues in length. Members of this family seem to be found exclusively in Arabidopsis thaliana. The function of this family is unknown.	.	.	.	.	.
PB.1787	PuSMRT_PB.1787.3_transcript839_f2p0_4152_g1,PuSMRT_PB.1787.2_transcript609_f3p0_4363_g1	+	1-,2-	Alternative 3' splice site(A3SS)	gi|566156566|ref|XM_002300865.2|	4416	0	Populus trichocarpa GIGANTEA family protein (POPTR_0002s06490g) mRNA, complete cds	Potri.002G064400	gi|566156567|ref|XP_002300901.2|	5965	0	GIGANTEA family protein [Populus trichocarpa]	Q9SQI2	1625	0	Protein GIGANTEA	.	.	.	.	pfam10459	Peptidase_S46	Peptidase S46. Dipeptidyl-peptidase 7 (DPP-7) is the best characterized member of this family. It is a serine peptidase that is located on the cell surface and is predicted to have two N-terminal transmembrane domains.	GO:0030154|cell differentiation;GO:0007623|circadian rhythm;GO:0009908|flower development;GO:0048578|positive regulation of long-day photoperiodism, flowering;GO:0009585|red, far-red light phototransduction;GO:0042752|regulation of circadian rhythm;GO:0006355|regulation of transcription, DNA-templated;GO:0009637|response to blue light;GO:0009409|response to cold;GO:0010218|response to far red lig…	GO:0005737|cytoplasm;GO:0005654|nucleoplasm;GO:0005634|nucleus;	.	K12124	GI; GIGANTEA
PB.1819	PuSMRT_PB.1819.2_transcript15347_f4p0_1524_g1,PuSMRT_PB.1819.10_transcript18130_f17p0_1330_g1/PuSMRT_PB.1819.1_transcript15141_f11p0_1534_g1/PuSMRT_PB.1819.3_transcript17902_f2p0_1347_g1/PuSMRT_PB.1819.4_transcript18709_f11p0_1298_g1	-	0,1^2-	Retained intron(RI)	gi|566156707|ref|XM_002302159.2|	1229	0	Populus trichocarpa hypothetical protein (POPTR_0002s07290g) mRNA, complete cds	Potri.002G072100	gi|224066747|ref|XP_002302195.1|	1710	0	hypothetical protein POPTR_0002s07290g [Populus trichocarpa]	P25141	580	0	Alcohol dehydrogenase 1	YPO1502	353	2e-114	COG1062	pfam08240	ADH_N	Alcohol dehydrogenase GroES-like domain. This is the catalytic domain of alcohol dehydrogenases. Many of them contain an inserted zinc binding domain. This domain has a GroES-like structure.	.	GO:0005737|cytoplasm;	GO:0004022|alcohol dehydrogenase (NAD) activity;GO:0008270|zinc ion binding;	.	.
PB.1835	PuSMRT_PB.1835.2_transcript2505_f13p0_3355_g1,PuSMRT_PB.1835.3_transcript2420_f2p0_3391_g1	-	1-,2-	Alternative 3' splice site(A3SS)	gi|743845324|ref|XM_011029151.1|	3269	0	PREDICTED: Populus euphratica NAD kinase 2, chloroplastic (LOC105127752), transcript variant X1, mRNA	Potri.002G078700	gi|743845325|ref|XP_011027453.1|	4931	0	PREDICTED: NAD kinase 2, chloroplastic isoform X1 [Populus euphratica]	Q9C5W3	1191	0	NAD kinase 2, chloroplastic	YEL041w	209	9e-57	COG0061	pfam01513	NAD_kinase	ATP-NAD kinase. Members of this family include ATP-NAD kinases EC:2.7.1.23, which catalyses the phosphorylation of NAD to NADP utilizing ATP and other nucleoside triphosphates as well as inorganic polyphosphate as a source of phosphorus. Also includes NADH kinases EC:2.7.1.86.	GO:0019674|NAD metabolic process;GO:0006741|NADP biosynthetic process;	GO:0009507|chloroplast;	GO:0005524|ATP binding;GO:0003951|NAD+ kinase activity;	K00858	ppnK, NADK; NAD+ kinase [EC:2.7.1.23]
PB.1899	PuSMRT_PB.1899.5_transcript16143_f6p0_1460_g1,PuSMRT_PB.1899.3_transcript25764_f4p0_891_g1/PuSMRT_PB.1899.6_transcript18845_f84p0_1238_g1	-	0,1^2-	Retained intron(RI)	gi|224066942|ref|XM_002302255.1|	763	0	Populus trichocarpa annexin 1 family protein (POPTR_0002s09610g) mRNA, complete cds	Potri.002G095600	gi|118487795|gb|ABK95721.1|	1156	4e-153	unknown [Populus trichocarpa]	Q9SYT0	348	1e-114	Annexin D1	.	.	.	.	pfam00191	Annexin	Annexin. This family of annexins also includes giardin that has been shown to function as an annexin.	GO:0070588|calcium ion transmembrane transport;GO:0071435|potassium ion export;GO:0009737|response to abscisic acid;GO:0046686|response to cadmium ion;GO:0009409|response to cold;GO:0009408|response to heat;GO:0006970|response to osmotic stress;GO:0009651|response to salt stress;GO:0009414|response to water deprivation;	GO:0048046|apoplast;GO:0005618|cell wall;GO:0009507|chloroplast;GO:0009570|chloroplast stroma;GO:0005829|cytosol;GO:0016020|membrane;GO:0005739|mitochondrion;GO:0005886|plasma membrane;GO:0009506|plasmodesma;GO:0009579|thylakoid;GO:0005774|vacuolar membrane;GO:0005773|vacuole;	GO:0005524|ATP binding;GO:0005509|calcium ion binding;GO:0005544|calcium-dependent phospholipid binding;GO:0005507|copper ion binding;GO:0004601|peroxidase activity;GO:0042803|protein homodimerization activity;GO:0008270|zinc ion binding;	.	.
PB.191	PuSMRT_PB.191.1_transcript2691_f3p0_3310_g1/PuSMRT_PB.191.3_transcript3410_f3p0_3103_g1,PuSMRT_PB.191.2_transcript3480_f2p0_3121_g1	-	0,1^2-	Retained intron(RI)	gi|566148697|ref|XM_002299308.2|	2916	0	Populus trichocarpa hypothetical protein (POPTR_0001s13110g) mRNA, complete cds	Potri.001G066200	gi|566148698|ref|XP_002299344.2|	4190	0	hypothetical protein POPTR_0001s13110g [Populus trichocarpa]	Q94JM3	764	0	Auxin response factor 2	.	.	.	.	pfam06507	Auxin_resp	Auxin response factor. A conserved region of auxin-responsive transcription factors.	GO:0009734|auxin-activated signaling pathway;GO:0010227|floral organ abscission;GO:0010047|fruit dehiscence;GO:0010150|leaf senescence;GO:0008285|negative regulation of cell proliferation;GO:0045892|negative regulation of transcription, DNA-templated;GO:0048481|ovule development;GO:0009911|positive regulation of flower development;GO:0009737|response to abscisic acid;GO:0006351|transcription, DNA…	GO:0005634|nucleus;	GO:0043565|sequence-specific DNA binding;GO:0003700|transcription factor activity, sequence-specific DNA binding;	.	.
PB.191	PuSMRT_PB.191.2_transcript3480_f2p0_3121_g1,PuSMRT_PB.191.1_transcript2691_f3p0_3310_g1/PuSMRT_PB.191.3_transcript3410_f3p0_3103_g1	-	1^,2^	Alternative 5' splice site(A5SS)	gi|566148697|ref|XM_002299308.2|	2916	0	Populus trichocarpa hypothetical protein (POPTR_0001s13110g) mRNA, complete cds	Potri.001G066200	gi|566148698|ref|XP_002299344.2|	4190	0	hypothetical protein POPTR_0001s13110g [Populus trichocarpa]	Q94JM3	764	0	Auxin response factor 2	.	.	.	.	pfam06507	Auxin_resp	Auxin response factor. A conserved region of auxin-responsive transcription factors.	GO:0009734|auxin-activated signaling pathway;GO:0010227|floral organ abscission;GO:0010047|fruit dehiscence;GO:0010150|leaf senescence;GO:0008285|negative regulation of cell proliferation;GO:0045892|negative regulation of transcription, DNA-templated;GO:0048481|ovule development;GO:0009911|positive regulation of flower development;GO:0009737|response to abscisic acid;GO:0006351|transcription, DNA…	GO:0005634|nucleus;	GO:0043565|sequence-specific DNA binding;GO:0003700|transcription factor activity, sequence-specific DNA binding;	.	.
PB.203	PuSMRT_PB.203.1_transcript14204_f12p0_1595_g1/PuSMRT_PB.203.3_transcript19192_f10p0_1200_g1,PuSMRT_PB.203.2_transcript14933_f2p0_1557_g1	+	1-,2-	Alternative 3' splice site(A3SS)	gi|566148666|ref|XM_002297845.2|	1603	0	Populus trichocarpa transaldolase family protein (POPTR_0001s12930g) mRNA, complete cds	Potri.001G068200	gi|566148667|ref|XP_002297881.2|	2111	0	transaldolase family protein [Populus trichocarpa]	A0LTY8	329	4e-106	Transaldolase	MT1495	303	2e-96	COG0176	pfam00923	Transaldolase	Transaldolase.	GO:0005975|carbohydrate metabolic process;GO:0006098|pentose-phosphate shunt;	GO:0005737|cytoplasm;	GO:0004801|sedoheptulose-7-phosphate:D-glyceraldehyde-3-phosphate glyceronetransferase activity;	K00616	E2.2.1.2, talA, talB; transaldolase [EC:2.2.1.2]
PB.2045	PuSMRT_PB.2045.3_transcript4849_f2p0_2754_g1,PuSMRT_PB.2045.1_transcript27302_f2p0_871_g1	-	1-,2-	Alternative 3' splice site(A3SS)	gi|566157845|ref|XM_006386465.1|	2419	0	Populus trichocarpa hypothetical protein (POPTR_0002s13540g) mRNA, complete cds	Potri.002G134300	gi|566157846|ref|XP_006386527.1|	3765	0	hypothetical protein POPTR_0002s13540g [Populus trichocarpa]	Q9C9Q4	186	1e-48	J domain-containing protein required for chloroplast accumulation response 1	.	.	.	.	pfam00226	DnaJ	DnaJ domain. DnaJ domains (J-domains) are associated with hsp70 heat-shock system and it is thought that this domain mediates the interaction. DnaJ-domain is therefore part of a chaperone (protein folding) system. The T-antigens, although not in Prosite are confirmed as DnaJ containing domains from literature.	GO:0007015|actin filament organization;GO:0071483|cellular response to blue light;GO:0009904|chloroplast accumulation movement;GO:0009903|chloroplast avoidance movement;GO:0006898|receptor-mediated endocytosis;	GO:0005737|cytoplasm;GO:0031982|vesicle;	.	.	.
PB.2056	PuSMRT_PB.2056.1_transcript18760_f2p0_1296_g1,PuSMRT_PB.2056.2_transcript19691_f4p0_1239_g1	-	1-,2-	Alternative 3' splice site(A3SS)	gi|566157909|ref|XM_002302457.2|	1468	0	Populus trichocarpa hypothetical protein (POPTR_0002s13830g) mRNA, complete cds	Potri.002G137400	gi|566157910|ref|XP_002302493.2|	1105	2e-146	hypothetical protein POPTR_0002s13830g [Populus trichocarpa]	Q94JU3	313	5e-102	COP9 signalosome complex subunit 7	.	.	.	.	pfam01399	PCI	PCI domain. This domain has also been called the PINT motif (Proteasome, Int-6, Nip-1 and TRIP-15).	GO:0010387|COP9 signalosome assembly;GO:0010388|cullin deneddylation;GO:0007275|multicellular organismal development;GO:0009585|red, far-red light phototransduction;	GO:0008180|COP9 signalosome;GO:0005829|cytosol;	.	K12180	COPS7, CSN7; COP9 signalosome complex subunit 7
PB.2079	PuSMRT_PB.2079.3_transcript35853_f4p0_465_g1,PuSMRT_PB.2079.1_transcript32080_f2p0_638_g1/PuSMRT_PB.2079.2_transcript34767_f7p0_518_g1	-	0,1-2^	Skipped exon(SE)	gi|566158010|ref|XM_006386496.1|	582	0	Populus trichocarpa hypothetical protein (POPTR_0002s14410g) mRNA, complete cds	Potri.002G143100	gi|224067618|ref|XP_002302515.1|	239	2e-22	sec61beta family protein [Populus trichocarpa]	P38389	82.8	1e-18	Protein transport protein Sec61 subunit beta	.	.	.	.	pfam03911	Sec61_beta	Sec61beta family. This family consists of homologues of Sec61beta - a component of the Sec61/SecYEG protein secretory system. The domain is found in eukaryotes and archaea and is possibly homologous to the bacterial SecG. It consists of a single putative transmembrane helix, preceded by a short stretch containing various charged residues; this arrangement may help determine orientation in the cel…	GO:0006886|intracellular protein transport;	GO:0016021|integral component of membrane;GO:0005784|Sec61 translocon complex;	.	K09481	SEC61B, SBH2; protein transport protein SEC61 subunit beta
PB.2085	PuSMRT_PB.2085.3_transcript20640_f2p0_1206_g1,PuSMRT_PB.2085.2_transcript26465_f6p0_835_g1	-	1-,2-	Alternative 3' splice site(A3SS)	gi|566158037|ref|XM_002302485.2|	849	0	Populus trichocarpa hypothetical protein (POPTR_0002s14540g) mRNA, complete cds	Potri.002G144600	gi|224067661|ref|XP_002302521.1|	566	1e-69	hypothetical protein POPTR_0002s14540g [Populus trichocarpa]	Q9LZZ9	192	3e-59	Autophagy-related protein 8g	.	.	.	.	pfam02991	Atg8	Autophagy protein Atg8 ubiquitin like. Light chain 3 is proposed to function primarily as a subunit of microtubule associated proteins 1A and 1B and that its expression may regulate microtubule binding activity. Autophagy is generally known as a process involved in the degradation of bulk cytoplasmic components that are non-specifically sequestered into an autophagosome, where they are sequestere…	GO:0006914|autophagy;GO:0006995|cellular response to nitrogen starvation;GO:0015031|protein transport;	GO:0000421|autophagosome membrane;GO:0033110|Cvt vesicle membrane;GO:0005874|microtubule;	.	K08341	GABARAP, ATG8, LC3; GABA(A) receptor-associated protein
PB.2128	PuSMRT_PB.2128.1_transcript16519_f2p0_1436_g1,PuSMRT_PB.2128.2_transcript16261_f4p0_1452_g1/PuSMRT_PB.2128.3_transcript16370_f4p0_1441_g1	+	1-,2-	Alternative 3' splice site(A3SS)	gi|566158254|ref|XM_002301312.2|	660	0	Populus trichocarpa short-chain dehydrogenase/reductase family protein (POPTR_0002s15840g) mRNA, complete cds	Potri.002G157000	gi|224064013|ref|XP_002301348.1|	882	2e-111	short-chain dehydrogenase/reductase family protein [Populus trichocarpa]	Q9M2E2	243	1e-73	(+)-neomenthol dehydrogenase	all0352	98.2	6e-22	COG1028	pfam00106	adh_short	short chain dehydrogenase. This family contains a wide variety of dehydrogenases.	GO:0006952|defense response;	.	GO:0047501|(+)-neomenthol dehydrogenase activity;	K15095	E1.1.1.208; (+)-neomenthol dehydrogenase [EC:1.1.1.208]
PB.2128	PuSMRT_PB.2128.3_transcript16370_f4p0_1441_g1,PuSMRT_PB.2128.1_transcript16519_f2p0_1436_g1/PuSMRT_PB.2128.2_transcript16261_f4p0_1452_g1	+	1-,2-	Alternative 3' splice site(A3SS)	gi|566158254|ref|XM_002301312.2|	660	0	Populus trichocarpa short-chain dehydrogenase/reductase family protein (POPTR_0002s15840g) mRNA, complete cds	Potri.002G157000	gi|224064013|ref|XP_002301348.1|	882	2e-111	short-chain dehydrogenase/reductase family protein [Populus trichocarpa]	Q9M2E2	243	1e-73	(+)-neomenthol dehydrogenase	all0352	98.2	6e-22	COG1028	pfam00106	adh_short	short chain dehydrogenase. This family contains a wide variety of dehydrogenases.	GO:0006952|defense response;	.	GO:0047501|(+)-neomenthol dehydrogenase activity;	K15095	E1.1.1.208; (+)-neomenthol dehydrogenase [EC:1.1.1.208]
PB.2148	PuSMRT_PB.2148.3_transcript17109_f11p0_1355_g1,PuSMRT_PB.2148.4_transcript18037_f2p0_1359_g1	-	0,1-2^	Skipped exon(SE)	gi|566158355|ref|XM_002302564.2|	1295	0	Populus trichocarpa hypothetical protein (POPTR_0002s16410g) mRNA, complete cds	Potri.002G162600	gi|566158356|ref|XP_002302600.2|	1859	0	hypothetical protein POPTR_0002s16410g [Populus trichocarpa]	Q9LMM6	406	2e-134	Protein BPS1, chloroplastic	.	.	.	.	pfam05055	DUF677	Protein of unknown function (DUF677). This family consists of AT14A like proteins from Arabidopsis thaliana. At14a has a small domain that has sequence similarities to integrins from fungi, insects and humans. Transcripts of At14a are found in all Arabidopsis tissues and localizes partly to the plasma membrane.	GO:0009793|embryo development ending in seed dormancy;GO:0048364|root development;GO:0048367|shoot system development;	GO:0009507|chloroplast;GO:0005886|plasma membrane;	.	.	.
PB.2170	PuSMRT_PB.2170.2_transcript7801_f2p0_2249_g1,PuSMRT_PB.2170.1_transcript10891_f18p0_1864_g1/PuSMRT_PB.2170.4_transcript12367_f5p0_1771_g1	-	0,1^2-	Retained intron(RI)	gi|566158455|ref|XM_002302586.2|	1701	0	Populus trichocarpa hydroxyproline-rich glycoprotein (POPTR_0002s17040g) mRNA, complete cds	Potri.002G169100	gi|566158456|ref|XP_002302622.2|	1339	3e-172	hydroxyproline-rich glycoprotein [Populus trichocarpa]	Q9M158	337	4e-103	Rhodanese-like domain-containing protein 4, chloroplastic	Rv0390	54.3	2e-07	COG0607	pfam08472	S6PP_C	Sucrose-6-phosphate phosphohydrolase C-terminal. This is the Sucrose-6-phosphate phosphohydrolase (S6PP or SPP) C-terminal domain as found in in plant sucrose phosphatases. These enzymes irreversibly catalyse the last step in sucrose synthesis following the formation of Sucrose-6-Phosphate via sucrose-phosphate synthase (SPS).	GO:0006032|chitin catabolic process;GO:0042742|defense response to bacterium;GO:0009772|photosynthetic electron transport in photosystem II;	GO:0009507|chloroplast;GO:0009941|chloroplast envelope;GO:0009534|chloroplast thylakoid;GO:0009535|chloroplast thylakoid membrane;GO:0005576|extracellular region;GO:0016021|integral component of membrane;	GO:0008061|chitin binding;GO:0004568|chitinase activity;	.	.
PB.2182	PuSMRT_PB.2182.2_transcript9360_f3p0_2049_g1,PuSMRT_PB.2182.1_transcript8783_f3p0_2119_g1	-	1^,2^	Alternative 5' splice site(A5SS)	gi|566158519|ref|XM_002302603.2|	2061	0	Populus trichocarpa hypothetical protein (POPTR_0002s17390g) mRNA, complete cds	Potri.002G173200	gi|566158520|ref|XP_002302639.2|	2141	0	hypothetical protein POPTR_0002s17390g [Populus trichocarpa]	.	.	.	.	.	.	.	.	pfam13903	Claudin_2	PMP-22/EMP/MP20/Claudin tight junction. Members of this family are claudins, that form tight junctions between cells.	.	.	.	.	.
PB.2211	PuSMRT_PB.2211.1_transcript16576_f10p0_1429_g1,PuSMRT_PB.2211.3_transcript13262_f2p0_1687_g1	-	0,1-2^	Skipped exon(SE)	gi|566158726|ref|XM_006386617.1|	1168	0	Populus trichocarpa hypothetical protein (POPTR_0002s18400g) mRNA, complete cds	Potri.002G183200	gi|566158727|ref|XP_006386679.1|	2056	0	hypothetical protein POPTR_0002s18400g [Populus trichocarpa]	Q9FMK9	515	6e-179	Probable inactive purple acid phosphatase 29	CAC1961	183	7e-52	COG1409	pfam00149	Metallophos	Calcineurin-like phosphoesterase. This family includes a diverse range of phosphoesterases, including protein phosphoserine phosphatases, nucleotidases, sphingomyelin phosphodiesterases and 2'-3' cAMP phosphodiesterases as well as nucleases such as bacterial SbcD or yeast MRE11. The most conserved regions in this superfamily centre around the metal chelating residues.	.	GO:0005576|extracellular region;	GO:0003993|acid phosphatase activity;GO:0046872|metal ion binding;	.	.
PB.2212	PuSMRT_PB.2212.2_transcript18360_f2p0_1324_g1,PuSMRT_PB.2212.4_transcript19276_f5p0_1264_g1	-	1-,2-	Alternative 3' splice site(A3SS)	gi|566158728|ref|XM_002302655.2|	1101	0	Populus trichocarpa chloroplast import-associated protein IAP36 (POPTR_0002s18420g) mRNA, complete cds	Potri.002G183400	gi|224068264|ref|XP_002302691.1|	1554	0	chloroplast import-associated protein IAP36 [Populus trichocarpa]	O23680	417	4e-140	Translocase of chloroplast 33, chloroplastic	.	.	.	.	pfam04548	AIG1	AIG1 family. Arabidopsis protein AIG1 appears to be involved in plant resistance to bacteria.	GO:0045036|protein targeting to chloroplast;	GO:0009507|chloroplast;GO:0009941|chloroplast envelope;GO:0009707|chloroplast outer membrane;GO:0016021|integral component of membrane;	GO:0005525|GTP binding;GO:0003924|GTPase activity;GO:0042802|identical protein binding;GO:0046872|metal ion binding;GO:0015450|P-P-bond-hydrolysis-driven protein transmembrane transporter activity;GO:0042803|protein homodimerization activity;	.	.
PB.2229	PuSMRT_PB.2229.2_transcript1526_f7p0_3721_g1/PuSMRT_PB.2229.3_transcript5843_f2p0_2567_g1,PuSMRT_PB.2229.1_transcript1527_f2p0_3724_g1	+	0,1^2-	Retained intron(RI)	gi|743923677|ref|XM_011007637.1|	3532	0	PREDICTED: Populus euphratica squamosa promoter-binding-like protein 1 (LOC105112070), transcript variant X1, mRNA	Potri.002G188700	gi|566158824|ref|XP_002302799.2|	4885	0	hypothetical protein POPTR_0002s18970g [Populus trichocarpa]	Q9SMX9	972	0	Squamosa promoter-binding-like protein 1	.	.	.	.	pfam03110	SBP	SBP domain. SBP domains (for SQUAMOSA-pROMOTER BINDING PROTEIN) are found in plant proteins. It is a sequence specific DNA-binding domain. Members of family probably function as transcription factors involved in the control of early flower development. The domain contains 10 conserved cysteine and histidine residues that probably are zinc ligands.	GO:0006355|regulation of transcription, DNA-templated;GO:0006351|transcription, DNA-templated;	GO:0005634|nucleus;	GO:0003677|DNA binding;GO:0046872|metal ion binding;GO:0003700|transcription factor activity, sequence-specific DNA binding;	.	.
PB.2243	PuSMRT_PB.2243.2_transcript27249_f4p0_828_g1,PuSMRT_PB.2243.1_transcript25162_f8p0_898_g1	+	1^,2^	Alternative 5' splice site(A5SS)	gi|566158869|ref|XM_006386637.1|	1098	0	Populus trichocarpa hypothetical protein (POPTR_0002s19210g) mRNA, complete cds	Potri.002G191400	gi|763815569|gb|KJB82421.1|	829	5e-105	hypothetical protein B456_013G208600 [Gossypium raimondii]	O48920	317	3e-104	ADP-ribosylation factor	.	.	.	.	pfam00025	Arf	ADP-ribosylation factor family. Pfam combines a number of different Prosite families together	GO:0015031|protein transport;GO:0007264|small GTPase mediated signal transduction;GO:0016192|vesicle-mediated transport;	GO:0005794|Golgi apparatus;	GO:0005525|GTP binding;	.	.
PB.2244	PuSMRT_PB.2244.2_transcript3859_f2p0_3013_g1,PuSMRT_PB.2244.1_transcript3415_f3p0_3101_g1	+	1^,2^	Alternative 5' splice site(A5SS)	gi|743917503|ref|XM_011004438.1|	3039	0	PREDICTED: Populus euphratica uncharacterized LOC105109662 (LOC105109662), transcript variant X1, mRNA	Potri.002G192300	gi|743917506|ref|XP_011002741.1|	2771	0	PREDICTED: uncharacterized protein LOC105109662 isoform X2 [Populus euphratica]	Q9FZD9	199	7e-52	DUF724 domain-containing protein 3	.	.	.	.	pfam05266	DUF724	Protein of unknown function (DUF724). This family contains several uncharacterized proteins found in Arabidopsis thaliana and other plants. This region is often found associated with Agenet domains and may contain coiled-coil.	GO:0040008|regulation of growth;GO:0006810|transport;	GO:0005773|vacuole;	.	.	.
PB.2245	PuSMRT_PB.2245.4_transcript3883_f5p0_3071_g1,PuSMRT_PB.2245.3_transcript5241_f3p0_2689_g1	-	0,1^2-	Retained intron(RI)	gi|566158899|ref|XM_002301492.2|	3065	0	Populus trichocarpa pre-mRNA splicing factor ATP-dependent RNA helicase family protein (POPTR_0002s19340g) mRNA, complete cds	Potri.002G192500	gi|224064627|ref|XP_002301528.1|	3638	0	pre-mRNA splicing factor ATP-dependent RNA helicase family protein [Populus trichocarpa]	Q9LZQ9	1276	0	Probable pre-mRNA-splicing factor ATP-dependent RNA helicase DEAH2	SPBC16H5.10c	892	0	COG1643	pfam04408	HA2	Helicase associated domain (HA2). This presumed domain is about 90 amino acid residues in length. It is found is a diverse set of RNA helicases. Its function is unknown, however it seems likely to be involved in nucleic acid binding.	GO:0006397|mRNA processing;GO:0006396|RNA processing;GO:0008380|RNA splicing;	GO:0005737|cytoplasm;GO:0005829|cytosol;GO:0005730|nucleolus;GO:0005634|nucleus;GO:0005681|spliceosomal complex;	GO:0005524|ATP binding;GO:0004004|ATP-dependent RNA helicase activity;GO:0044822|poly(A) RNA binding;	K12820	DHX15, PRP43; pre-mRNA-splicing factor ATP-dependent RNA helicase DHX15/PRP43 [EC:3.6.4.13]
PB.2279	PuSMRT_PB.2279.1_transcript3378_f6p0_3108_g1/PuSMRT_PB.2279.2_transcript4747_f9p0_2768_g1/PuSMRT_PB.2279.3_transcript3081_f2p0_3221_g1/PuSMRT_PB.2279.4_transcript7069_f2p0_2364_g1/PuSMRT_PB.2279.6_transcript11532_f4p0_1827_g1/PuSMRT_PB.2279.8_transcript23695_f2p0_1046_g1/PuSMRT_PB.2279.9_transcript33993_f2p0_568_g1,PuSMRT_PB.2279.7_transcript7683_f2p0_2288_g1	+	1^,2^	Alternative 5' splice site(A5SS)	gi|566159082|ref|XM_002302691.2|	3469	0	Populus trichocarpa sucrose synthase family protein (POPTR_0002s20340g) mRNA, complete cds	Potri.002G202300	gi|224068370|ref|XP_002302727.1|	4311	0	sucrose synthase family protein [Populus trichocarpa]	O24301	1443	0	Sucrose synthase 2	.	.	.	.	pfam00862	Sucrose_synth	Sucrose synthase. Sucrose synthases catalyse the synthesis of sucrose from UDP-glucose and fructose. This family includes the bulk of the sucrose synthase protein. However the carboxyl terminal region of the sucrose synthases belongs to the glycosyl transferase family pfam00534.	GO:0005985|sucrose metabolic process;	.	GO:0016157|sucrose synthase activity;	.	.
PB.2281	PuSMRT_PB.2281.2_transcript17830_f6p0_1339_g1/PuSMRT_PB.2281.3_transcript20812_f2p0_1204_g1,PuSMRT_PB.2281.1_transcript19021_f2p0_1277_g1	+	0,1-2^	Skipped exon(SE)	gi|743941384|ref|XM_011016878.1|	850	0	PREDICTED: Populus euphratica bifunctional epoxide hydrolase 2-like (LOC105118828), transcript variant X2, mRNA	Potri.002G202700	gi|743941385|ref|XP_011015180.1|	1304	6e-176	PREDICTED: bifunctional epoxide hydrolase 2-like isoform X2 [Populus euphratica]	Q6Q2C2	164	2e-42	Bifunctional epoxide hydrolase 2	.	.	.	.	pfam12697	Abhydrolase_6	Alpha/beta hydrolase family. This family contains alpha/beta hydrolase enzymes of diverse specificity.	GO:0019439|aromatic compound catabolic process;GO:0046839|phospholipid dephosphorylation;GO:0009636|response to toxic substance;	GO:0005777|peroxisome;	GO:0033885|10-hydroxy-9-(phosphonooxy)octadecanoate phosphatase activity;GO:0004301|epoxide hydrolase activity;GO:0016787|hydrolase activity;GO:0042577|lipid phosphatase activity;GO:0000287|magnesium ion binding;	K08726	EPHX2; soluble epoxide hydrolase / lipid-phosphate phosphatase [EC:3.3.2.10 3.1.3.76]
PB.2290	PuSMRT_PB.2290.1_transcript20187_f5p0_1212_g1,PuSMRT_PB.2290.2_transcript26152_f2p0_908_g1	+	1-,2-	Alternative 3' splice site(A3SS)	.	.	.	.	.	.	.	.	.	.	.	.	.	.	.	.	.	.	.	.	.	.	.	.	.
PB.2312	PuSMRT_PB.2312.2_transcript1058_f2p0_3979_g1,PuSMRT_PB.2312.1_transcript3663_f7p0_3027_g1/PuSMRT_PB.2312.3_transcript5334_f2p0_2669_g1	+	0,1^2-	Retained intron(RI)	gi|566159500|ref|XM_002301523.2|	3688	0	Populus trichocarpa phosphatase family protein (POPTR_0002s22810g) mRNA, complete cds	Potri.002G213300	gi|224064780|ref|XP_002301559.1|	4348	0	phosphatase family protein [Populus trichocarpa]	Q8L7U5	1437	0	Serine/threonine-protein phosphatase BSL1	YER133w	272	5e-81	COG0639	pfam00149	Metallophos	Calcineurin-like phosphoesterase. This family includes a diverse range of phosphoesterases, including protein phosphoserine phosphatases, nucleotidases, sphingomyelin phosphodiesterases and 2'-3' cAMP phosphodiesterases as well as nucleases such as bacterial SbcD or yeast MRE11. The most conserved regions in this superfamily centre around the metal chelating residues.	GO:0009742|brassinosteroid mediated signaling pathway;	GO:0005634|nucleus;GO:0005886|plasma membrane;	GO:0046872|metal ion binding;GO:0004721|phosphoprotein phosphatase activity;	K01090	E3.1.3.16; protein phosphatase [EC:3.1.3.16]
PB.2313	PuSMRT_PB.2313.1_transcript2416_f2p0_3397_g1/PuSMRT_PB.2313.3_transcript851_f2p0_4137_g1,PuSMRT_PB.2313.2_transcript2493_f2p0_3364_g1	-	0,1-2^	Skipped exon(SE)	gi|566159497|ref|XM_002302780.2|	2818	0	Populus trichocarpa hypothetical protein (POPTR_0002s22800g) mRNA, complete cds	Potri.002G213400	gi|224068751|ref|XP_002302816.1|	4668	0	hypothetical protein POPTR_0002s22800g [Populus trichocarpa]	F4JI44	597	0	Nodulin homeobox	.	.	.	.	pfam12098	DUF3574	Protein of unknown function (DUF3574). This family of proteins is functionally uncharacterized. This protein is found in bacteria and viruses. Proteins in this family are typically between 144 to 163 amino acids in length. This protein has a conserved TPRF sequence motif.	GO:0009908|flower development;GO:0060195|negative regulation of antisense RNA transcription;	GO:0005730|nucleolus;GO:0005634|nucleus;	GO:0003697|single-stranded DNA binding;	.	.
PB.2318	PuSMRT_PB.2318.2_transcript13421_f2p0_1731_g1,PuSMRT_PB.2318.5_transcript21571_f5p0_1135_g1	+	0,1^2-	Retained intron(RI)	gi|566159460|ref|XM_006386763.1|	810	0	Populus trichocarpa hypothetical protein (POPTR_0002s22600g) mRNA, complete cds	Potri.002G214800	gi|566159461|ref|XP_006386825.1|	1081	3e-138	hypothetical protein POPTR_0002s22600g [Populus trichocarpa]	P12858	351	2e-112	Glyceraldehyde-3-phosphate dehydrogenase A, chloroplastic	sll1342	189	8e-55	COG0057	pfam00044	Gp_dh_N	Glyceraldehyde 3-phosphate dehydrogenase, NAD binding domain. GAPDH is a tetrameric NAD-binding enzyme involved in glycolysis and glyconeogenesis. N-terminal domain is a Rossmann NAD(P) binding fold.	GO:0006006|glucose metabolic process;GO:0019253|reductive pentose-phosphate cycle;	GO:0009507|chloroplast;	GO:0047100|glyceraldehyde-3-phosphate dehydrogenase (NADP+) (phosphorylating) activity;GO:0051287|NAD binding;GO:0050661|NADP binding;	.	.
PB.233	PuSMRT_PB.233.1_transcript194_f3p0_5251_g1/PuSMRT_PB.233.2_transcript1566_f2p0_3716_g1,PuSMRT_PB.233.3_transcript189_f2p0_5253_g1	+	1^,2^	Alternative 5' splice site(A5SS)	gi|566148485|ref|XM_002297885.2|	3558	0	Populus trichocarpa hypothetical protein (POPTR_0001s11900g) mRNA, complete cds	Potri.001G078600	gi|743842494|ref|XP_011026710.1|	7445	0	PREDICTED: nuclear pore complex protein NUP160 isoform X1 [Populus euphratica]	Q9C811	1436	0	Nuclear pore complex protein NUP160	.	.	.	.	pfam11715	Nup160	Nucleoporin Nup120/160. Nup120 is conserved from fungi to plants to humans, and is homologous with the Nup160 of vertebrates. The nuclear core complex, or NPC, mediates macromolecular transport across the nuclear envelope. Deletion of the NUP120 gene causes clustering of NPCs at one side of the nuclear envelope, moderate nucleolar fragmentation and slower cell growth. The vertebrate NPC is estima…	GO:0006952|defense response;GO:0016973|poly(A)+ mRNA export from nucleus;GO:0015031|protein transport;GO:0009733|response to auxin;GO:0009409|response to cold;	GO:0031965|nuclear membrane;GO:0005643|nuclear pore;	GO:0005487|nucleocytoplasmic transporter activity;	K14303	NUP160, NUP120; nuclear pore complex protein Nup160
PB.2339	PuSMRT_PB.2339.1_transcript8760_f2p0_2121_g1,PuSMRT_PB.2339.2_transcript9205_f6p0_2058_g1	+	1-,2-	Alternative 3' splice site(A3SS)	gi|566159373|ref|XM_002301547.2|	2006	0	Populus trichocarpa hypothetical protein (POPTR_0002s22210g) mRNA, complete cds	Potri.002G221500	gi|224064852|ref|XP_002301583.1|	2914	0	hypothetical protein POPTR_0002s22210g [Populus trichocarpa]	Q9LUB7	825	0	Protein OBERON 2	.	.	.	.	pfam07227	DUF1423	Protein of unknown function (DUF1423). This family represents a conserved region approximately 500 residues long within a number of Arabidopsis thaliana proteins of unknown function.	GO:0009793|embryo development ending in seed dormancy;GO:0010078|maintenance of root meristem identity;GO:0010492|maintenance of shoot apical meristem identity;GO:0080022|primary root development;GO:0010468|regulation of gene expression;GO:0010071|root meristem specification;GO:0046740|transport of virus in host, cell to cell;	GO:0005634|nucleus;	GO:0046982|protein heterodimerization activity;GO:0042803|protein homodimerization activity;GO:0008270|zinc ion binding;	.	.
PB.2378	PuSMRT_PB.2378.2_transcript5105_f2p0_2708_g1,PuSMRT_PB.2378.1_transcript18594_f5p0_1300_g1	+	0,1^2-	Retained intron(RI)	gi|566159598|ref|XM_002301611.2|	827	0	Populus trichocarpa eukaryotic translation initiation factor 3 subunit 3 family protein (POPTR_0002s23460g) mRNA, complete cds	Potri.002G233500	gi|224065052|ref|XP_002301647.1|	1704	0	eukaryotic translation initiation factor 3 subunit 3 family protein [Populus trichocarpa]	Q9C5Z2	541	0	Eukaryotic translation initiation factor 3 subunit H	.	.	.	.	pfam01398	JAB	JAB1/Mov34/MPN/PAD-1 ubiquitin protease. Members of this family are found in proteasome regulatory subunits, eukaryotic initiation factor 3 (eIF3) subunits and regulators of transcription factors. This family is also known as the MPN domain and PAD-1-like domain, JABP1 domain or JAMM domain. These are metalloenzymes that function as the ubiquitin isopeptidase/ deubiquitinase in the ubiquitin-base…	GO:0009738|abscisic acid-activated signaling pathway;GO:0001731|formation of translation preinitiation complex;GO:0045948|positive regulation of translational initiation;GO:0009737|response to abscisic acid;GO:0009733|response to auxin;GO:0009749|response to glucose;GO:0034286|response to maltose;GO:0009744|response to sucrose;	GO:0005829|cytosol;GO:0016282|eukaryotic 43S preinitiation complex;GO:0033290|eukaryotic 48S preinitiation complex;GO:0005852|eukaryotic translation initiation factor 3 complex;GO:0042788|polysomal ribosome;	GO:0003743|translation initiation factor activity;	K03247	EIF3H; translation initiation factor 3 subunit H
PB.2412	PuSMRT_PB.2412.1_transcript2375_f2p0_3404_g1,PuSMRT_PB.2412.2_transcript5021_f6p0_2721_g1	+	0,1^2-	Retained intron(RI)	gi|224065335|ref|XM_002301744.1|	2987	0	Populus trichocarpa WD-40 repeat family protein (POPTR_0002s24320g) mRNA, complete cds	Potri.002G241800	gi|224065336|ref|XP_002301780.1|	3831	0	WD-40 repeat family protein [Populus trichocarpa]	O48847	898	0	Transcriptional corepressor LEUNIG_HOMOLOG	.	.	.	.	pfam00400	WD40	WD domain, G-beta repeat.	GO:0030154|cell differentiation;GO:0006974|cellular response to DNA damage stimulus;GO:0071217|cellular response to external biotic stimulus;GO:0009908|flower development;GO:0010393|galacturonan metabolic process;GO:0010073|meristem maintenance;GO:0010192|mucilage biosynthetic process;GO:0080001|mucilage extrusion from seed coat;GO:0048359|mucilage metabolic process involved in seed coat developm…	GO:0005634|nucleus;	.	.	.
PB.2412	PuSMRT_PB.2412.1_transcript2375_f2p0_3404_g1,PuSMRT_PB.2412.2_transcript5021_f6p0_2721_g1/PuSMRT_PB.2412.3_transcript4641_f6p0_2785_g1	+	0,1^2-	Retained intron(RI)	gi|224065335|ref|XM_002301744.1|	2987	0	Populus trichocarpa WD-40 repeat family protein (POPTR_0002s24320g) mRNA, complete cds	Potri.002G241800	gi|224065336|ref|XP_002301780.1|	3831	0	WD-40 repeat family protein [Populus trichocarpa]	O48847	898	0	Transcriptional corepressor LEUNIG_HOMOLOG	.	.	.	.	pfam00400	WD40	WD domain, G-beta repeat.	GO:0030154|cell differentiation;GO:0006974|cellular response to DNA damage stimulus;GO:0071217|cellular response to external biotic stimulus;GO:0009908|flower development;GO:0010393|galacturonan metabolic process;GO:0010073|meristem maintenance;GO:0010192|mucilage biosynthetic process;GO:0080001|mucilage extrusion from seed coat;GO:0048359|mucilage metabolic process involved in seed coat developm…	GO:0005634|nucleus;	.	.	.
PB.2454	PuSMRT_PB.2454.1_transcript265_f2p0_5012_g1,PuSMRT_PB.2454.2_transcript298_f6p0_4905_g1/PuSMRT_PB.2454.3_transcript5696_f2p0_2633_g1	-	0,1^2-	Retained intron(RI)	gi|743833481|ref|XM_011026234.1|	4589	0	PREDICTED: Populus euphratica CLIP-associated protein (LOC105125675), transcript variant X1, mRNA	Potri.002G253200	gi|743833482|ref|XP_011024536.1|	7277	0	PREDICTED: CLIP-associated protein isoform X1 [Populus euphratica]	Q8RWY6	2104	0	CLIP-associated protein	.	.	.	.	pfam12348	CLASP_N	CLASP N terminal. This region is found at the N terminal of CLIP-associated proteins (CLASPs). CLASPs are widely conserved microtubule plus-end-tracking proteins that regulate the stability of dynamic microtubules. In yeast, Drosophila, and Xenopus, a single CLASP orthologue is present. In mammals, a second paralogue (CLASP2) exists which has some functional overlap with CLASP1.	GO:0051301|cell division;GO:0016049|cell growth;GO:0043622|cortical microtubule organization;GO:0007067|mitotic nuclear division;GO:0007026|negative regulation of microtubule depolymerization;GO:0050821|protein stabilization;	GO:0005938|cell cortex;GO:0009524|phragmoplast;GO:0005886|plasma membrane;GO:0009506|plasmodesma;GO:0005876|spindle microtubule;	GO:0051010|microtubule plus-end binding;	K16578	CLASP1_2; CLIP-associating protein 1/2
PB.2461	PuSMRT_PB.2461.1_transcript2278_f2p0_3452_g1/PuSMRT_PB.2461.2_transcript1931_f3p0_3561_g1/PuSMRT_PB.2461.4_transcript162_f8p0_5312_g1,PuSMRT_PB.2461.3_transcript678_f2p0_4312_g1	-	1^,2^	Alternative 5' splice site(A5SS)	gi|566159955|ref|XM_002303064.2|	5319	0	Populus trichocarpa myosin heavy chain family protein (POPTR_0002s25560g) mRNA, complete cds	Potri.002G254300	gi|224070005|ref|XP_002303100.1|	8021	0	myosin heavy chain family protein [Populus trichocarpa]	F4I460	2412	0	Myosin-8	YOR326w	663	0	COG5022	pfam00063	Myosin_head	Myosin head (motor domain).	GO:0030048|actin filament-based movement;	GO:0005737|cytoplasm;GO:0016459|myosin complex;	GO:0005524|ATP binding;GO:0003774|motor activity;	.	.
PB.2461	PuSMRT_PB.2461.3_transcript678_f2p0_4312_g1,PuSMRT_PB.2461.1_transcript2278_f2p0_3452_g1/PuSMRT_PB.2461.2_transcript1931_f3p0_3561_g1/PuSMRT_PB.2461.4_transcript162_f8p0_5312_g1	-	1^,2^	Alternative 5' splice site(A5SS)	gi|566159955|ref|XM_002303064.2|	5319	0	Populus trichocarpa myosin heavy chain family protein (POPTR_0002s25560g) mRNA, complete cds	Potri.002G254300	gi|224070005|ref|XP_002303100.1|	8021	0	myosin heavy chain family protein [Populus trichocarpa]	F4I460	2412	0	Myosin-8	YOR326w	663	0	COG5022	pfam00063	Myosin_head	Myosin head (motor domain).	GO:0030048|actin filament-based movement;	GO:0005737|cytoplasm;GO:0016459|myosin complex;	GO:0005524|ATP binding;GO:0003774|motor activity;	.	.
PB.2477	PuSMRT_PB.2477.1_transcript4330_f3p0_2844_g1,PuSMRT_PB.2477.2_transcript5235_f2p0_2683_g1	-	0,1^2-	Retained intron(RI)	.	.	.	.	.	.	.	.	.	.	.	.	.	.	.	.	.	.	.	.	.	.	.	.	.
PB.2480	PuSMRT_PB.2480.1_transcript1366_f3p0_3808_g1,PuSMRT_PB.2480.2_transcript1253_f2p0_3854_g1	+	1-,2-	Alternative 3' splice site(A3SS)	gi|566160092|ref|XM_006386870.1|	3916	0	Populus trichocarpa hypothetical protein (POPTR_0002s26380g) mRNA, complete cds	Potri.002G263000	gi|566160093|ref|XP_006386932.1|	5933	0	hypothetical protein POPTR_0002s26380g [Populus trichocarpa]	F4HPN2	1103	0	Probable serine/threonine protein kinase IRE4	.	.	.	.	pfam00069	Pkinase	Protein kinase domain.	.	.	GO:0005524|ATP binding;GO:0046872|metal ion binding;GO:0004674|protein serine/threonine kinase activity;	.	.
PB.2480	PuSMRT_PB.2480.2_transcript1253_f2p0_3854_g1,PuSMRT_PB.2480.1_transcript1366_f3p0_3808_g1	+	0,1^2-	Retained intron(RI)	gi|566160092|ref|XM_006386870.1|	3916	0	Populus trichocarpa hypothetical protein (POPTR_0002s26380g) mRNA, complete cds	Potri.002G263000	gi|566160093|ref|XP_006386932.1|	5933	0	hypothetical protein POPTR_0002s26380g [Populus trichocarpa]	F4HPN2	1103	0	Probable serine/threonine protein kinase IRE4	.	.	.	.	pfam00069	Pkinase	Protein kinase domain.	.	.	GO:0005524|ATP binding;GO:0046872|metal ion binding;GO:0004674|protein serine/threonine kinase activity;	.	.
PB.2486	PuSMRT_PB.2486.2_transcript5954_f2p0_2545_g1/PuSMRT_PB.2486.3_transcript6938_f3p0_2385_g1,PuSMRT_PB.2486.1_transcript5397_f4p0_2655_g1	+	0,1-2^	Skipped exon(SE)	gi|566160163|ref|XM_006385126.1|	2482	0	Populus trichocarpa auxin response factor 1 family protein (POPTR_0003s00890g) mRNA, complete cds	Potri.003G001000	gi|566160164|ref|XP_006385188.1|	3422	0	auxin response factor 1 family protein [Populus trichocarpa]	Q8L7G0	892	0	Auxin response factor 1	.	.	.	.	pfam06507	Auxin_resp	Auxin response factor. A conserved region of auxin-responsive transcription factors.	GO:0009734|auxin-activated signaling pathway;GO:0010150|leaf senescence;GO:0045892|negative regulation of transcription, DNA-templated;GO:0009733|response to auxin;GO:0006351|transcription, DNA-templated;	GO:0005634|nucleus;	GO:0003677|DNA binding;GO:0042802|identical protein binding;GO:0003700|transcription factor activity, sequence-specific DNA binding;	K14486	K14486, ARF; auxin response factor
PB.2490	PuSMRT_PB.2490.2_transcript1989_f2p0_3622_g1,PuSMRT_PB.2490.1_transcript3051_f5p0_3193_g1	-	1-,2-	Alternative 3' splice site(A3SS)	gi|566259857|ref|XM_006389421.1|	3063	0	Populus trichocarpa hypothetical protein (POPTR_0022s00280g) mRNA, complete cds	Potri.003G003400	gi|566259858|ref|XP_006389483.1|	5085	0	hypothetical protein POPTR_0022s00280g [Populus trichocarpa]	Q9HCG7	559	7e-180	Non-lysosomal glucosylceramidase	alr2816	239	2e-65	COG4354	pfam04685	DUF608	Protein of unknown function, DUF608. This family represents a conserved region with a pankaryotic distribution in a number of uncharacterized proteins.	GO:0008206|bile acid metabolic process;GO:0021954|central nervous system neuron development;GO:0006680|glucosylceramide catabolic process;GO:0016139|glycoside catabolic process;GO:0006687|glycosphingolipid metabolic process;	GO:0005789|endoplasmic reticulum membrane;GO:0000139|Golgi membrane;GO:0016021|integral component of membrane;GO:0005886|plasma membrane;GO:0005790|smooth endoplasmic reticulum;	GO:0008422|beta-glucosidase activity;GO:0004348|glucosylceramidase activity;	K17108	GBA2; non-lysosomal glucosylceramidase [EC:3.2.1.45]
PB.2490	PuSMRT_PB.2490.2_transcript1989_f2p0_3622_g1,PuSMRT_PB.2490.1_transcript3051_f5p0_3193_g1	-	0,1^2-	Retained intron(RI)	gi|566259857|ref|XM_006389421.1|	3063	0	Populus trichocarpa hypothetical protein (POPTR_0022s00280g) mRNA, complete cds	Potri.003G003400	gi|566259858|ref|XP_006389483.1|	5085	0	hypothetical protein POPTR_0022s00280g [Populus trichocarpa]	Q9HCG7	559	7e-180	Non-lysosomal glucosylceramidase	alr2816	239	2e-65	COG4354	pfam04685	DUF608	Protein of unknown function, DUF608. This family represents a conserved region with a pankaryotic distribution in a number of uncharacterized proteins.	GO:0008206|bile acid metabolic process;GO:0021954|central nervous system neuron development;GO:0006680|glucosylceramide catabolic process;GO:0016139|glycoside catabolic process;GO:0006687|glycosphingolipid metabolic process;	GO:0005789|endoplasmic reticulum membrane;GO:0000139|Golgi membrane;GO:0016021|integral component of membrane;GO:0005886|plasma membrane;GO:0005790|smooth endoplasmic reticulum;	GO:0008422|beta-glucosidase activity;GO:0004348|glucosylceramidase activity;	K17108	GBA2; non-lysosomal glucosylceramidase [EC:3.2.1.45]
PB.2510	PuSMRT_PB.2510.2_transcript16789_f2p0_1430_g1,PuSMRT_PB.2510.1_transcript16883_f2p0_1428_g1	+	0,1^2-	Retained intron(RI)	.	.	.	.	.	.	.	.	.	.	.	.	.	.	.	.	.	.	.	.	.	.	.	.	.
PB.2539	PuSMRT_PB.2539.1_transcript2297_f2p0_3431_g1,PuSMRT_PB.2539.2_transcript2851_f4p0_3258_g1	-	1-,2-	Alternative 3' splice site(A3SS)	gi|743921833|ref|XM_011006683.1|	2751	0	PREDICTED: Populus euphratica copper-transporting ATPase PAA1, chloroplastic-like (LOC105111356), mRNA	Potri.003G024000	gi|743921834|ref|XP_011004985.1|	3997	0	PREDICTED: copper-transporting ATPase PAA1, chloroplastic-like [Populus euphratica]	Q9SZC9	1079	0	Copper-transporting ATPase PAA1, chloroplastic	all3782	568	0	COG2217	pfam00122	E1-E2_ATPase	E1-E2 ATPase.	GO:0055070|copper ion homeostasis;GO:0035434|copper ion transmembrane transport;GO:0009767|photosynthetic electron transport chain;	GO:0009507|chloroplast;GO:0009941|chloroplast envelope;GO:0031969|chloroplast membrane;GO:0009570|chloroplast stroma;GO:0005887|integral component of plasma membrane;GO:0009536|plastid;	GO:0005524|ATP binding;GO:0016531|copper chaperone activity;GO:0005375|copper ion transmembrane transporter activity;GO:0043682|copper-transporting ATPase activity;	.	.
PB.2539	PuSMRT_PB.2539.3_transcript22019_f6p0_1113_g1,PuSMRT_PB.2539.4_transcript24591_f3p0_989_g1	-	1-,2-	Alternative 3' splice site(A3SS)	gi|743921833|ref|XM_011006683.1|	2751	0	PREDICTED: Populus euphratica copper-transporting ATPase PAA1, chloroplastic-like (LOC105111356), mRNA	Potri.003G024000	gi|743921834|ref|XP_011004985.1|	3997	0	PREDICTED: copper-transporting ATPase PAA1, chloroplastic-like [Populus euphratica]	Q9SZC9	1079	0	Copper-transporting ATPase PAA1, chloroplastic	all3782	568	0	COG2217	pfam00122	E1-E2_ATPase	E1-E2 ATPase.	GO:0055070|copper ion homeostasis;GO:0035434|copper ion transmembrane transport;GO:0009767|photosynthetic electron transport chain;	GO:0009507|chloroplast;GO:0009941|chloroplast envelope;GO:0031969|chloroplast membrane;GO:0009570|chloroplast stroma;GO:0005887|integral component of plasma membrane;GO:0009536|plastid;	GO:0005524|ATP binding;GO:0016531|copper chaperone activity;GO:0005375|copper ion transmembrane transporter activity;GO:0043682|copper-transporting ATPase activity;	.	.
PB.254	PuSMRT_PB.254.2_transcript8814_f2p0_2116_g1,PuSMRT_PB.254.1_transcript6726_f6p0_2414_g1	+	1^,2^	Alternative 5' splice site(A5SS)	gi|566148388|ref|XM_002297914.2|	2372	0	Populus trichocarpa hypothetical protein (POPTR_0001s11320g) mRNA, complete cds	Potri.001G084300	gi|566148389|ref|XP_002297950.2|	2605	0	hypothetical protein POPTR_0001s11320g [Populus trichocarpa]	P09379	128	3e-29	GTPase-activating protein GYP7	SPAC630.05	125	7e-29	COG5210	pfam00566	RabGAP-TBC	Rab-GTPase-TBC domain. Identification of a TBC domain in GYP6_YEAST and GYP7_YEAST, which are GTPase activator proteins of yeast Ypt6 and Ypt7, implies that these domains are GTPase activator proteins of Rab-like small GTPases.	GO:0090630|activation of GTPase activity;GO:0006886|intracellular protein transport;GO:0032889|regulation of vacuole fusion, non-autophagic;GO:0031338|regulation of vesicle fusion;GO:0016192|vesicle-mediated transport;	GO:0005829|cytosol;GO:0012505|endomembrane system;GO:0005622|intracellular;GO:0005634|nucleus;	GO:0005096|GTPase activator activity;GO:0017137|Rab GTPase binding;	.	.
PB.2541	PuSMRT_PB.2541.8_transcript479_f3p0_4536_g1,PuSMRT_PB.2541.9_transcript2155_f3p0_3491_g1	+	1^,2^	Alternative 5' splice site(A5SS)	gi|90819250|gb|AC183421.2|	1407	0	Populus trichocarpa clone Pop1-23P7, complete sequence	Potri.003G029600	gi|566160441|ref|XP_006385271.1|	1418	2e-170	hypothetical protein POPTR_0003s02320g [Populus trichocarpa]	F4I171	250	2e-66	Mediator of RNA polymerase II transcription subunit 15a	.	.	.	.	pfam15449	Retinal	Retinal protein. This family of proteins is found in the photoreceptor cells of the retina. Mutations of the gene encoding this protein have been associated with retinal disorders such as retinitis pigmentosa and late-onset progressive retinal atrophy. The function of this family of proteins is unknown, but it is likely to be important in the development and function of the retina.	GO:0045723|positive regulation of fatty acid biosynthetic process;GO:0006355|regulation of transcription, DNA-templated;GO:0009751|response to salicylic acid;GO:0006351|transcription, DNA-templated;	GO:0016592|mediator complex;GO:0005634|nucleus;	GO:0031490|chromatin DNA binding;GO:0003713|transcription coactivator activity;	K14972	PAXIP1, PTIP; PAX-interacting protein 1
PB.2541	PuSMRT_PB.2541.1_transcript5257_f4p0_2672_g1/PuSMRT_PB.2541.4_transcript4378_f3p0_2877_g1/PuSMRT_PB.2541.6_transcript5861_f3p0_2566_g1,PuSMRT_PB.2541.5_transcript6630_f3p0_2462_g1	+	0,1^2-	Retained intron(RI)	gi|743903091|ref|XM_011046590.1|	1684	0	PREDICTED: Populus euphratica mediator of RNA polymerase II transcription subunit 15a-like (LOC105139948), transcript variant X6, mRNA	Potri.003G028000	gi|566259613|ref|XP_006389363.1|	2859	0	hypothetical protein POPTR_0027s00370g [Populus trichocarpa]	F4I171	203	2e-51	Mediator of RNA polymerase II transcription subunit 15a	.	.	.	.	pfam00131	Metallothio	Metallothionein.	GO:0045723|positive regulation of fatty acid biosynthetic process;GO:0006355|regulation of transcription, DNA-templated;GO:0009751|response to salicylic acid;GO:0006351|transcription, DNA-templated;	GO:0016592|mediator complex;GO:0005634|nucleus;	GO:0031490|chromatin DNA binding;GO:0003713|transcription coactivator activity;	K14972	PAXIP1, PTIP; PAX-interacting protein 1
PB.2541	PuSMRT_PB.2541.7_transcript948_f2p0_4047_g1,PuSMRT_PB.2541.1_transcript5257_f4p0_2672_g1/PuSMRT_PB.2541.4_transcript4378_f3p0_2877_g1/PuSMRT_PB.2541.5_transcript6630_f3p0_2462_g1/PuSMRT_PB.2541.6_transcript5861_f3p0_2566_g1	+	0,1^2-	Retained intron(RI)	gi|743903091|ref|XM_011046590.1|	1684	0	PREDICTED: Populus euphratica mediator of RNA polymerase II transcription subunit 15a-like (LOC105139948), transcript variant X6, mRNA	Potri.003G028000	gi|566259613|ref|XP_006389363.1|	2859	0	hypothetical protein POPTR_0027s00370g [Populus trichocarpa]	F4I171	203	2e-51	Mediator of RNA polymerase II transcription subunit 15a	.	.	.	.	pfam00131	Metallothio	Metallothionein.	GO:0045723|positive regulation of fatty acid biosynthetic process;GO:0006355|regulation of transcription, DNA-templated;GO:0009751|response to salicylic acid;GO:0006351|transcription, DNA-templated;	GO:0016592|mediator complex;GO:0005634|nucleus;	GO:0031490|chromatin DNA binding;GO:0003713|transcription coactivator activity;	K14972	PAXIP1, PTIP; PAX-interacting protein 1
PB.2548	PuSMRT_PB.2548.10_transcript4003_f4p0_2943_g1/PuSMRT_PB.2548.12_transcript641_f2p0_4311_g1/PuSMRT_PB.2548.1_transcript2808_f2p0_3325_g1/PuSMRT_PB.2548.2_transcript2137_f3p0_3505_g1/PuSMRT_PB.2548.4_transcript215_f2p0_5188_g1/PuSMRT_PB.2548.5_transcript439_f3p0_4679_g1/PuSMRT_PB.2548.6_transcript90_f6p0_5750_g1/PuSMRT_PB.2548.7_transcript1266_f3p0_3851_g1/PuSMRT_PB.2548.9_transcript277_f2p0_4980_g…	-	1-,2-	Alternative 3' splice site(A3SS)	gi|566160488|ref|XM_006385232.1|	5745	0	Populus trichocarpa hypothetical protein (POPTR_0003s02530g) mRNA, complete cds	Potri.003G031000	gi|566160489|ref|XP_006385294.1|	8201	0	hypothetical protein POPTR_0003s02530g [Populus trichocarpa]	F4JKH6	1358	0	Protein TSS	.	.	.	.	pfam12807	eIF3_p135	Translation initiation factor eIF3 subunit 135. Translation initiation factor eIF3 is a multi-subunit protein complex required for initiation of protein biosynthesis in eukaryotic cells. The complex promotes ribosome dissociation, the binding of the initiator methionyl-tRNA to the 40 S ribosomal subunit, and mRNA recruitment to the ribosome. The protein product from TIF31 genes in yeast is p135 w…	GO:0007049|cell cycle;GO:0007275|multicellular organismal development;	.	.	K03255	TIF31, CLU1; protein TIF31
PB.2571	PuSMRT_PB.2571.1_transcript3782_f2p0_3074_g1,PuSMRT_PB.2571.2_transcript2769_f2p0_3281_g1	-	1-,2-	Alternative 3' splice site(A3SS)	gi|743913758|ref|XM_011002499.1|	2711	0	PREDICTED: Populus euphratica receptor-like serine/threonine-protein kinase ALE2 (LOC105108253), transcript variant X2, mRNA	Potri.003G039100	gi|566160643|ref|XP_006385369.1|	3447	0	hypothetical protein POPTR_0003s03140g [Populus trichocarpa]	Q8RWW0	545	1e-178	Receptor-like serine/threonine-protein kinase ALE2	lin1934_1	98.2	5e-21	COG0515	pfam07714	Pkinase_Tyr	Protein tyrosine kinase.	GO:0030154|cell differentiation;GO:0042335|cuticle development;GO:0046777|protein autophosphorylation;GO:0010068|protoderm histogenesis;	GO:0016021|integral component of membrane;GO:0005886|plasma membrane;	GO:0005524|ATP binding;GO:0016301|kinase activity;GO:0004674|protein serine/threonine kinase activity;	.	.
PB.259	PuSMRT_PB.259.2_transcript7184_f4p0_2348_g1,PuSMRT_PB.259.3_transcript6885_f14p0_2385_g1/PuSMRT_PB.259.4_transcript7714_f2p0_2262_g1	-	0,1-2^	Skipped exon(SE)	gi|743842865|ref|XM_011028509.1|	2040	0	PREDICTED: Populus euphratica serine/threonine-protein kinase WNK8 (LOC105127273), transcript variant X1, mRNA	Potri.001G085500	gi|566148372|ref|XP_002299436.2|	2801	0	kinase family protein [Populus trichocarpa]	Q944Q0	606	0	Serine/threonine-protein kinase WNK8	.	.	.	.	pfam00069	Pkinase	Protein kinase domain.	GO:0035556|intracellular signal transduction;GO:0048573|photoperiodism, flowering;GO:0009911|positive regulation of flower development;GO:0046777|protein autophosphorylation;GO:0006468|protein phosphorylation;GO:0009909|regulation of flower development;GO:0010228|vegetative to reproductive phase transition of meristem;	GO:0005829|cytosol;GO:0005634|nucleus;	GO:0005524|ATP binding;GO:0004672|protein kinase activity;GO:0004674|protein serine/threonine kinase activity;	K08867	WNK, PRKWNK; WNK lysine deficient protein kinase [EC:2.7.11.1]
PB.2599	PuSMRT_PB.2599.4_transcript2863_f2p0_3272_g1,PuSMRT_PB.2599.1_transcript1136_f17p0_3916_g1/PuSMRT_PB.2599.2_transcript1336_f6p0_3807_g1/PuSMRT_PB.2599.3_transcript747_f4p0_4201_g1	+	1-,2-	Alternative 3' splice site(A3SS)	gi|743937271|ref|XM_011014739.1|	3398	0	PREDICTED: Populus euphratica homeobox-leucine zipper protein ATHB-15-like (LOC105117169), transcript variant X1, mRNA	Potri.003G050100	gi|224074019|ref|XP_002304217.1|	4426	0	homeobox-leucine zipper family protein [Populus trichocarpa]	Q9ZU11	1486	0	Homeobox-leucine zipper protein ATHB-15	.	.	.	.	pfam08670	MEKHLA	MEKHLA domain. The MEKHLA domain shares similarity with the PAS domain and is found in the 3' end of plant HD-ZIP III homeobox genes, and bacterial proteins.	GO:0030154|cell differentiation;GO:0006355|regulation of transcription, DNA-templated;GO:0006351|transcription, DNA-templated;	GO:0005634|nucleus;	GO:0003677|DNA binding;GO:0008289|lipid binding;	K09338	HD-ZIP; homeobox-leucine zipper protein
PB.26	PuSMRT_PB.26.2_transcript4630_f7p0_2797_g1,PuSMRT_PB.26.1_transcript4587_f2p0_2810_g1	+	1^,2^	Alternative 5' splice site(A5SS)	gi|743932771|ref|XM_011012380.1|	1482	0	PREDICTED: Populus euphratica DEAD-box ATP-dependent RNA helicase 37-like (LOC105115487), transcript variant X3, mRNA	Potri.001G007900	gi|566147195|ref|XP_002297644.2|	1896	0	hypothetical protein POPTR_0001s04510g [Populus trichocarpa]	Q84W89	561	0	DEAD-box ATP-dependent RNA helicase 37	.	.	.	.	pfam00270	DEAD	DEAD/DEAH box helicase. Members of this family include the DEAD and DEAH box helicases. Helicases are involved in unwinding nucleic acids. The DEAD box helicases are involved in various aspects of RNA metabolizm, including nuclear transcription, pre mRNA splicing, ribosome biogenesis, nucleocytoplasmic transport, translation, RNA decay and organellar gene expression.	GO:0010501|RNA secondary structure unwinding;	GO:0005777|peroxisome;	GO:0005524|ATP binding;GO:0004004|ATP-dependent RNA helicase activity;GO:0003723|RNA binding;	K11594	DDX3X, bel; ATP-dependent RNA helicase DDX3X [EC:3.6.4.13]
PB.2615	PuSMRT_PB.2615.1_transcript4186_f2p0_2899_g1,PuSMRT_PB.2615.3_transcript5580_f3p0_2614_g1	-	1-,2-	Alternative 3' splice site(A3SS)	gi|566160953|ref|XM_002303251.2|	2840	0	Populus trichocarpa kinesin motor family protein (POPTR_0003s05270g) mRNA, complete cds	Potri.003G053800	gi|566160954|ref|XP_002303287.2|	3544	0	kinesin motor family protein [Populus trichocarpa]	Q940Y8	1010	0	Kinesin-like protein KIN-13B	ECU11g0470	247	6e-70	COG5059	pfam00225	Kinesin	Kinesin motor domain.	GO:0016049|cell growth;GO:0007018|microtubule-based movement;GO:1903338|regulation of cell wall organization or biogenesis;	GO:0005871|kinesin complex;GO:0005874|microtubule;GO:0005634|nucleus;GO:0005886|plasma membrane;	GO:0005524|ATP binding;GO:0016887|ATPase activity;GO:0003777|microtubule motor activity;	K10393	KIF2_24, MCAK; kinesin family member 2/24
PB.2621	PuSMRT_PB.2621.1_transcript3181_f6p0_3152_g1/PuSMRT_PB.2621.4_transcript3102_f2p0_3191_g1,PuSMRT_PB.2621.2_transcript2719_f17p0_3274_g1/PuSMRT_PB.2621.3_transcript2885_f13p0_3232_g1/PuSMRT_PB.2621.5_transcript8249_f2p0_2198_g1/PuSMRT_PB.2621.6_transcript8161_f2p0_2197_g1/PuSMRT_PB.2621.7_transcript27283_f2p0_860_g1	+	1^,2^	Alternative 5' splice site(A5SS)	gi|743913806|ref|XM_011002521.1|	2822	0	PREDICTED: Populus euphratica coatomer subunit beta'-2 (LOC105108273), transcript variant X1, mRNA	Potri.003G056300	gi|743913807|ref|XP_011000823.1|	4349	0	PREDICTED: coatomer subunit beta'-2 isoform X1 [Populus euphratica]	Q9C827	1536	0	Coatomer subunit beta'-2	.	.	.	.	pfam04053	Coatomer_WDAD	Coatomer WD associated region. This region is composed of WD40 repeats.	GO:0006888|ER to Golgi vesicle-mediated transport;GO:0006891|intra-Golgi vesicle-mediated transport;GO:0006886|intracellular protein transport;GO:0006890|retrograde vesicle-mediated transport, Golgi to ER;	GO:0030126|COPI vesicle coat;GO:0000139|Golgi membrane;	GO:0005198|structural molecule activity;	K17302	COPB2, SEC27; coatomer, subunit beta'
PB.2642	PuSMRT_PB.2642.2_transcript6519_f2p0_2459_g1,PuSMRT_PB.2642.1_transcript9613_f2p0_2024_g1	-	1^,2^	Alternative 5' splice site(A5SS)	gi|743893628|ref|XM_011041750.1|	2130	0	PREDICTED: Populus euphratica polyadenylate-binding protein-interacting protein 3-like (LOC105136419), transcript variant X5, mRNA	Potri.003G063000	gi|743893629|ref|XP_011040052.1|	2624	0	PREDICTED: polyadenylate-binding protein-interacting protein 4-like isoform X4 [Populus euphratica]	Q94AM9	302	2e-88	Polyadenylate-binding protein-interacting protein 4	YGR178c	87.8	9e-17	COG5180	pfam14438	SM-ATX	Ataxin 2 SM domain. This SM domain is found in Ataxin-2.	GO:0010603|regulation of cytoplasmic mRNA processing body assembly;GO:0034063|stress granule assembly;	GO:0010494|cytoplasmic stress granule;	GO:0044822|poly(A) RNA binding;	.	.
PB.2650	PuSMRT_PB.2650.1_transcript12397_f5p0_1742_g1,PuSMRT_PB.2650.2_transcript13782_f3p0_1653_g1	-	0,1^2-	Retained intron(RI)	.	.	.	.	.	.	.	.	.	.	.	.	.	.	.	.	.	.	.	.	.	.	.	.	.
PB.2705	PuSMRT_PB.2705.1_transcript11847_f3p0_1807_g1,PuSMRT_PB.2705.2_transcript19698_f2p0_1252_g1	+	0,1^2-	Retained intron(RI)	gi|566161527|ref|XM_006385507.1|	1037	0	Populus trichocarpa hypothetical protein (POPTR_0003s081901g) mRNA, partial cds	Potri.003G083600	gi|743864664|ref|XP_011031980.1|	1390	0	PREDICTED: (S)-ureidoglycine aminohydrolase isoform X4 [Populus euphratica]	Q8GXV5	428	1e-145	(S)-ureidoglycine aminohydrolase	DR1152	134	2e-35	COG3257	pfam07883	Cupin_2	Cupin domain. This family represents the conserved barrel domain of the 'cupin' superfamily ('cupa' is the Latin term for a small barrel).	GO:0000256|allantoin catabolic process;GO:0006145|purine nucleobase catabolic process;GO:0006355|regulation of transcription, DNA-templated;GO:0010136|ureide catabolic process;	GO:0005783|endoplasmic reticulum;	GO:0046872|metal ion binding;GO:0003700|transcription factor activity, sequence-specific DNA binding;GO:0071522|ureidoglycine aminohydrolase activity;	K14977	ylbA, UGHY; (S)-ureidoglycine aminohydrolase [EC:3.5.3.26]
PB.2730	PuSMRT_PB.2730.1_transcript27490_f2p0_846_g1,PuSMRT_PB.2730.2_transcript29382_f2p0_776_g1	-	1-,2-	Alternative 3' splice site(A3SS)	gi|566161673|ref|XM_006385575.1|	1398	0	Populus trichocarpa ferredoxin family protein (POPTR_0003s08900g) mRNA, complete cds	Potri.003G090400	gi|566161674|ref|XP_006385637.1|	1018	2e-132	ferredoxin family protein [Populus trichocarpa]	P08451	98.6	1e-22	Ferredoxin-2	all2919	156	5e-44	COG0633	pfam00111	Fer2	2Fe-2S iron-sulfur cluster binding domain.	GO:0022900|electron transport chain;	.	GO:0051537|2 iron, 2 sulfur cluster binding;GO:0009055|electron carrier activity;GO:0046872|metal ion binding;	K02639	petF; ferredoxin
PB.2748	PuSMRT_PB.2748.1_transcript13707_f2p0_1649_g1/PuSMRT_PB.2748.3_transcript14499_f3p0_1588_g1,PuSMRT_PB.2748.2_transcript13564_f2p0_1676_g1	-	0,1^2-	Retained intron(RI)	gi|743938901|ref|XM_011015589.1|	874	0	PREDICTED: Populus euphratica syntaxin-22-like (LOC105117820), mRNA	Potri.003G095300	gi|566161774|ref|XP_002304351.2|	1033	4e-132	syntaxin family protein [Populus trichocarpa]	O04378	314	8e-100	Syntaxin-23	SPBC31E1.04	50.8	6e-06	COG5325	pfam14523	Syntaxin_2	Syntaxin-like protein. This domain includes syntaxin-like domains including from the Vam3p protein.	GO:0006886|intracellular protein transport;GO:0048278|vesicle docking;GO:0006906|vesicle fusion;	GO:0012505|endomembrane system;GO:0016021|integral component of membrane;GO:0031201|SNARE complex;	GO:0000149|SNARE binding;	K08488	STX7; syntaxin 7
PB.2748	PuSMRT_PB.2748.3_transcript14499_f3p0_1588_g1,PuSMRT_PB.2748.1_transcript13707_f2p0_1649_g1/PuSMRT_PB.2748.2_transcript13564_f2p0_1676_g1	-	1^,2^	Alternative 5' splice site(A5SS)	gi|743938901|ref|XM_011015589.1|	874	0	PREDICTED: Populus euphratica syntaxin-22-like (LOC105117820), mRNA	Potri.003G095300	gi|566161774|ref|XP_002304351.2|	1033	4e-132	syntaxin family protein [Populus trichocarpa]	O04378	314	8e-100	Syntaxin-23	SPBC31E1.04	50.8	6e-06	COG5325	pfam14523	Syntaxin_2	Syntaxin-like protein. This domain includes syntaxin-like domains including from the Vam3p protein.	GO:0006886|intracellular protein transport;GO:0048278|vesicle docking;GO:0006906|vesicle fusion;	GO:0012505|endomembrane system;GO:0016021|integral component of membrane;GO:0031201|SNARE complex;	GO:0000149|SNARE binding;	K08488	STX7; syntaxin 7
PB.2771	PuSMRT_PB.2771.3_transcript5083_f29p0_2688_g1,PuSMRT_PB.2771.1_transcript5058_f2p0_2728_g1	-	1-,2-	Alternative 3' splice site(A3SS)	.	.	.	.	.	.	.	.	.	.	.	.	.	.	.	.	.	.	.	.	.	.	.	.	.
PB.2776	PuSMRT_PB.2776.1_transcript29062_f2p0_771_g1,PuSMRT_PB.2776.2_transcript33859_f9p0_544_g1	+	0,1^2-	Retained intron(RI)	gi|566161937|ref|XM_002303431.2|	661	0	Populus trichocarpa DNA-directed RNA polymerase II 8.2 kDa polypeptide family protein (POPTR_0003s10190g) mRNA, complete cds	Potri.003G102900	gi|590694753|ref|XP_007044696.1|	379	1e-42	RNA polymerases N / 8 kDa subunit [Theobroma cacao]	Q39290	139	4e-40	DNA-directed RNA polymerases I, II, and III subunit RPABC5	SPAC1B3.12c	114	4e-31	COG1644	pfam01194	RNA_pol_N	RNA polymerases N / 8 kDa subunit.	GO:0006351|transcription, DNA-templated;	GO:0005634|nucleus;	GO:0003677|DNA binding;GO:0003899|DNA-directed RNA polymerase activity;GO:0008270|zinc ion binding;	K03007	RPB10, POLR2L; DNA-directed RNA polymerases I, II, and III subunit RPABC5
PB.2776	PuSMRT_PB.2776.3_transcript35453_f5p0_487_g1,PuSMRT_PB.2776.2_transcript33859_f9p0_544_g1	+	1-,2-	Alternative 3' splice site(A3SS)	gi|566161937|ref|XM_002303431.2|	661	0	Populus trichocarpa DNA-directed RNA polymerase II 8.2 kDa polypeptide family protein (POPTR_0003s10190g) mRNA, complete cds	Potri.003G102900	gi|590694753|ref|XP_007044696.1|	379	1e-42	RNA polymerases N / 8 kDa subunit [Theobroma cacao]	Q39290	139	4e-40	DNA-directed RNA polymerases I, II, and III subunit RPABC5	SPAC1B3.12c	114	4e-31	COG1644	pfam01194	RNA_pol_N	RNA polymerases N / 8 kDa subunit.	GO:0006351|transcription, DNA-templated;	GO:0005634|nucleus;	GO:0003677|DNA binding;GO:0003899|DNA-directed RNA polymerase activity;GO:0008270|zinc ion binding;	K03007	RPB10, POLR2L; DNA-directed RNA polymerases I, II, and III subunit RPABC5
PB.2780	PuSMRT_PB.2780.1_transcript17869_f2p0_1350_g1,PuSMRT_PB.2780.2_transcript17521_f5p0_1344_g1	-	0,1^2-	Retained intron(RI)	.	.	.	.	.	.	.	.	.	.	.	.	.	.	.	.	.	.	.	.	.	.	.	.	.
PB.2802	PuSMRT_PB.2802.2_transcript425_f4p0_4631_g1,PuSMRT_PB.2802.3_transcript445_f3p0_4617_g1	-	0,1^2-	Retained intron(RI)	gi|566162063|ref|XM_002304378.2|	4595	0	Populus trichocarpa hypothetical protein (POPTR_0003s10940g) mRNA, complete cds	Potri.003G110000	gi|566162064|ref|XP_002304414.2|	7477	0	hypothetical protein POPTR_0003s10940g [Populus trichocarpa]	Q9FPR3	184	8e-46	Serine/threonine-protein kinase EDR1	YAR019c	106	3e-22	COG0515	pfam07714	Pkinase_Tyr	Protein tyrosine kinase.	GO:0009738|abscisic acid-activated signaling pathway;GO:0008219|cell death;GO:0002229|defense response to oomycetes;GO:0009873|ethylene-activated signaling pathway;GO:0000165|MAPK cascade;GO:0009788|negative regulation of abscisic acid-activated signaling pathway;GO:0046777|protein autophosphorylation;GO:1900424|regulation of defense response to bacterium;GO:1900150|regulation of defense response…	GO:0005829|cytosol;GO:0005769|early endosome;GO:0005783|endoplasmic reticulum;GO:0005768|endosome;GO:0005634|nucleus;GO:0005886|plasma membrane;GO:0005802|trans-Golgi network;GO:0012510|trans-Golgi network transport vesicle membrane;	GO:0005524|ATP binding;GO:0016301|kinase activity;GO:0004709|MAP kinase kinase kinase activity;GO:0004712|protein serine/threonine/tyrosine kinase activity;	.	.
PB.2812	PuSMRT_PB.2812.1_transcript1618_f2p0_3686_g1,PuSMRT_PB.2812.2_transcript6500_f7p0_2456_g1/PuSMRT_PB.2812.3_transcript7098_f18p0_2322_g1/PuSMRT_PB.2812.4_transcript8251_f4p0_2185_g1	+	0,1^2-	Retained intron(RI)	gi|566162113|ref|XM_002303483.2|	1909	0	Populus trichocarpa vacuolar invertase family protein (POPTR_0003s11210g) mRNA, complete cds	Potri.003G112600	gi|224071565|ref|XP_002303519.1|	3035	0	vacuolar invertase family protein [Populus trichocarpa]	P29001	779	0	Acid beta-fructofuranosidase	BS_sacC	170	3e-43	COG1621	pfam00251	Glyco_hydro_32N	Glycosyl hydrolases family 32 N-terminal domain. This domain corresponds to the N-terminal domain of glycosyl hydrolase family 32 which forms a five bladed beta propeller structure.	GO:0005985|sucrose metabolic process;	GO:0005773|vacuole;	GO:0004575|sucrose alpha-glucosidase activity;	.	.
PB.2823	PuSMRT_PB.2823.1_transcript4304_f3p0_2879_g1,PuSMRT_PB.2823.2_transcript4283_f9p0_2826_g1/PuSMRT_PB.2823.3_transcript4571_f2p0_2817_g1/PuSMRT_PB.2823.4_transcript4707_f21p0_2698_g1	+	1-,2-	Alternative 3' splice site(A3SS)	gi|566162163|ref|XM_002303497.2|	3040	0	Populus trichocarpa hypothetical protein (POPTR_0003s11510g) mRNA, complete cds	Potri.003G115500	gi|743871582|ref|XP_011033892.1|	3792	0	PREDICTED: cullin-1-like [Populus euphratica]	Q94AH6	1209	0	Cullin-1	SPAC24H6.03	291	3e-83	COG5647	pfam00888	Cullin	Cullin family.	GO:0009734|auxin-activated signaling pathway;GO:0007049|cell cycle;GO:0009793|embryo development ending in seed dormancy;GO:0009873|ethylene-activated signaling pathway;GO:0009867|jasmonic acid mediated signaling pathway;GO:0048366|leaf development;GO:0010087|phloem or xylem histogenesis;GO:0042787|protein ubiquitination involved in ubiquitin-dependent protein catabolic process;GO:0042752|regulat…	GO:0000794|condensed nuclear chromosome;GO:0031461|cullin-RING ubiquitin ligase complex;GO:0005737|cytoplasm;GO:0005829|cytosol;GO:0005634|nucleus;GO:0009524|phragmoplast;GO:0005819|spindle;	GO:0031625|ubiquitin protein ligase binding;	K03347	CUL1, CDC53; cullin 1
PB.2823	PuSMRT_PB.2823.3_transcript4571_f2p0_2817_g1,PuSMRT_PB.2823.1_transcript4304_f3p0_2879_g1/PuSMRT_PB.2823.2_transcript4283_f9p0_2826_g1/PuSMRT_PB.2823.4_transcript4707_f21p0_2698_g1/PuSMRT_PB.2823.5_transcript6423_f2p0_2502_g1	+	0,1^2-	Retained intron(RI)	gi|566162163|ref|XM_002303497.2|	3040	0	Populus trichocarpa hypothetical protein (POPTR_0003s11510g) mRNA, complete cds	Potri.003G115500	gi|743871582|ref|XP_011033892.1|	3792	0	PREDICTED: cullin-1-like [Populus euphratica]	Q94AH6	1209	0	Cullin-1	SPAC24H6.03	291	3e-83	COG5647	pfam00888	Cullin	Cullin family.	GO:0009734|auxin-activated signaling pathway;GO:0007049|cell cycle;GO:0009793|embryo development ending in seed dormancy;GO:0009873|ethylene-activated signaling pathway;GO:0009867|jasmonic acid mediated signaling pathway;GO:0048366|leaf development;GO:0010087|phloem or xylem histogenesis;GO:0042787|protein ubiquitination involved in ubiquitin-dependent protein catabolic process;GO:0042752|regulat…	GO:0000794|condensed nuclear chromosome;GO:0031461|cullin-RING ubiquitin ligase complex;GO:0005737|cytoplasm;GO:0005829|cytosol;GO:0005634|nucleus;GO:0009524|phragmoplast;GO:0005819|spindle;	GO:0031625|ubiquitin protein ligase binding;	K03347	CUL1, CDC53; cullin 1
PB.2841	PuSMRT_PB.2841.2_transcript5616_f2p0_2616_g1,PuSMRT_PB.2841.1_transcript5201_f2p0_2695_g1	-	0,1-2^	Skipped exon(SE)	gi|743871302|ref|XM_011035516.1|	2401	0	PREDICTED: Populus euphratica SPX domain-containing membrane protein At4g22990-like (LOC105132178), transcript variant X7, mRNA	Potri.003G120600	gi|224074813|ref|XP_002304461.1|	3458	0	SPX domain-containing family protein [Populus trichocarpa]	Q93ZQ5	1111	0	SPX domain-containing membrane protein At4g22990	.	.	.	.	pfam03105	SPX	SPX domain. We have named this region the SPX domain after (SYG1, Pho81 and XPR1). This 180 residue length domain is found at the amino terminus of a variety of proteins. In the yeast protein SYG1, the N-terminus directly binds to the G- protein beta subunit and inhibits transduction of the mating pheromone signal. This finding suggests that all the members of this family are involved in G-protei…	GO:0055085|transmembrane transport;	GO:0016021|integral component of membrane;	.	.	.
PB.2849	PuSMRT_PB.2849.2_transcript29992_f2p0_747_g1,PuSMRT_PB.2849.1_transcript11726_f5p0_1779_g1	+	1-,2-	Alternative 3' splice site(A3SS)	gi|566162299|ref|XM_002303535.2|	1790	0	Populus trichocarpa hypothetical protein (POPTR_0003s12350g) mRNA, complete cds	Potri.003G123300	gi|566162300|ref|XP_002303571.2|	1363	0	hypothetical protein POPTR_0003s12350g [Populus trichocarpa]	Q9LN71	400	3e-132	E3 ubiquitin-protein ligase At1g12760	.	.	.	.	pfam13639	zf-RING_2	Ring finger domain.	GO:0043161|proteasome-mediated ubiquitin-dependent protein catabolic process;	GO:0016021|integral component of membrane;	GO:0016874|ligase activity;GO:0061630|ubiquitin protein ligase activity;GO:0004842|ubiquitin-protein transferase activity;GO:0008270|zinc ion binding;	.	.
PB.2891	PuSMRT_PB.2891.2_transcript5730_f2p0_2585_g1,PuSMRT_PB.2891.1_transcript5411_f2p0_2682_g1	+	1-,2-	Alternative 3' splice site(A3SS)	gi|566162443|ref|XM_002303577.2|	2585	0	Populus trichocarpa hypothetical protein (POPTR_0003s13290g) mRNA, complete cds	Potri.003G133100	gi|566162444|ref|XP_002303613.2|	3524	0	hypothetical protein POPTR_0003s13290g [Populus trichocarpa]	.	.	.	.	.	.	.	.	pfam09786	CytochromB561_N	Cytochrome B561, N terminal. Members of this family are found in the N terminal region of cytochrome B561, as well as in various other putative uncharacterized proteins.	.	.	.	.	.
PB.2893	PuSMRT_PB.2893.3_transcript5384_f3p0_2658_g1,PuSMRT_PB.2893.1_transcript3553_f2p0_3081_g1/PuSMRT_PB.2893.2_transcript4138_f5p0_2824_g1	-	0,1-2^	Skipped exon(SE)	gi|566162455|ref|XM_002304492.2|	2965	0	Populus trichocarpa hypothetical protein (POPTR_0003s13370g) mRNA, complete cds	Potri.003G133900	gi|566162456|ref|XP_002304528.2|	3796	0	hypothetical protein POPTR_0003s13370g [Populus trichocarpa]	Q9FE38	946	0	Potassium transporter 3	YPO0006	248	7e-70	COG3158	pfam02705	K_trans	K+ potassium transporter. This is a family of K+ potassium transporters that are conserved across phyla, having both bacterial (KUP), yeast (HAK), and plant (AtKT) sequences as members.	GO:0009932|cell tip growth;	GO:0016021|integral component of membrane;GO:0016020|membrane;GO:0005886|plasma membrane;GO:0005774|vacuolar membrane;	GO:0015079|potassium ion transmembrane transporter activity;	K03549	kup; KUP system potassium uptake protein
PB.2901	PuSMRT_PB.2901.1_transcript20491_f2p0_1195_g1,PuSMRT_PB.2901.2_transcript38233_f2p0_365_g1	-	1-,2-	Alternative 3' splice site(A3SS)	gi|566162485|ref|XM_006385721.1|	1532	0	Populus trichocarpa hypothetical protein (POPTR_0003s13500g) mRNA, complete cds	Potri.003G135200	gi|566162492|ref|XP_006385785.1|	1670	0	hypothetical protein POPTR_0003s13500g [Populus trichocarpa]	.	.	.	.	.	.	.	.	pfam03417	AAT	Acyl-coenzyme A:6-aminopenicillanic acid acyl-transferase.	.	.	.	.	.
PB.2921	PuSMRT_PB.2921.1_transcript21335_f3p0_1146_g1,PuSMRT_PB.2921.2_transcript21797_f2p0_1126_g1	+	1-,2-	Alternative 3' splice site(A3SS)	gi|566162564|ref|XM_002303613.2|	1393	0	Populus trichocarpa hypothetical protein (POPTR_0003s14040g) mRNA, complete cds	Potri.003G140500	gi|743826235|ref|XP_011022751.1|	948	1e-122	PREDICTED: uncharacterized protein LOC105124428, partial [Populus euphratica]	.	.	.	.	.	.	.	.	pfam00169	PH	PH domain. PH stands for pleckstrin homology.	.	.	.	.	.
PB.2983	PuSMRT_PB.2983.1_transcript23349_f5p0_1044_g1/PuSMRT_PB.2983.3_transcript27444_f2p0_860_g1,PuSMRT_PB.2983.2_transcript25084_f5p0_923_g1	+	0,1^2-	Retained intron(RI)	gi|566162851|ref|XM_006385797.1|	1253	0	Populus trichocarpa DREPP plasma membrane polypeptide family protein (POPTR_0003s15580g) mRNA, complete cds	Potri.003G157100	gi|566162852|ref|XP_006385859.1|	555	2e-65	DREPP plasma membrane polypeptide family protein [Populus trichocarpa]	Q96262	144	2e-38	Plasma membrane-associated cation-binding protein 1	.	.	.	.	pfam05558	DREPP	DREPP plasma membrane polypeptide. This family contains several plant plasma membrane proteins termed DREPPs as they are developmentally regulated plasma membrane polypeptides.	GO:0071280|cellular response to copper ion;GO:0071281|cellular response to iron ion;GO:0071286|cellular response to magnesium ion;GO:0010350|cellular response to magnesium starvation;GO:0071325|cellular response to mannitol stimulus;GO:0071219|cellular response to molecule of bacterial origin;GO:0035865|cellular response to potassium ion;GO:0071472|cellular response to salt stress;GO:0072709|cell…	GO:0046658|anchored component of plasma membrane;GO:0005881|cytoplasmic microtubule;GO:0005886|plasma membrane;GO:0009506|plasmodesma;	GO:0005509|calcium ion binding;GO:0005516|calmodulin binding;GO:0005507|copper ion binding;GO:0008017|microtubule binding;GO:0005547|phosphatidylinositol-3,4,5-trisphosphate binding;GO:0043325|phosphatidylinositol-3,4-bisphosphate binding;GO:0080025|phosphatidylinositol-3,5-bisphosphate binding;GO:0005546|phosphatidylinositol-4,5-bisphosphate binding;	.	.
PB.3029	PuSMRT_PB.3029.1_transcript23858_f14p0_975_g1,PuSMRT_PB.3029.3_transcript26104_f4p0_894_g1	+	1-,2-	Alternative 3' splice site(A3SS)	gi|743818992|ref|XM_011022471.1|	830	0	PREDICTED: Populus euphratica MADS-box transcription factor 14-like (LOC105123027), transcript variant X3, mRNA	Potri.003G170000	gi|743818993|ref|XP_011020773.1|	861	4e-113	PREDICTED: MADS-box transcription factor 14-like isoform X3 [Populus euphratica]	Q0D4T4	146	9e-40	MADS-box transcription factor 18	YMR043w	67.8	5e-12	COG5068	pfam00319	SRF-TF	SRF-type transcription factor (DNA-binding and dimerization domain).	GO:0030154|cell differentiation;GO:0009908|flower development;GO:0000165|MAPK cascade;GO:0045944|positive regulation of transcription from RNA polymerase II promoter;GO:0006351|transcription, DNA-templated;	GO:0005634|nucleus;	GO:0000977|RNA polymerase II regulatory region sequence-specific DNA binding;GO:0003700|transcription factor activity, sequence-specific DNA binding;	.	.
PB.306	PuSMRT_PB.306.2_transcript5663_f4p0_2602_g1/PuSMRT_PB.306.3_transcript13820_f2p0_1647_g1,PuSMRT_PB.306.1_transcript5544_f3p0_2691_g1	-	1-,2-	Alternative 3' splice site(A3SS)	gi|743843521|ref|XM_011028669.1|	2527	0	PREDICTED: Populus euphratica uncharacterized LOC105127399 (LOC105127399), transcript variant X1, mRNA	Potri.001G098500	gi|566148173|ref|XP_002299507.2|	3122	0	hypothetical protein POPTR_0001s09950g [Populus trichocarpa]	.	.	.	.	.	.	.	.	pfam03142	Chitin_synth_2	Chitin synthase. Members of this family are fungal chitin synthase EC:2.4.1.16 enzymes. They catalyse chitin synthesis as follows: UDP-N-acetyl-D-glucosamine + {(1,4)-(N-acetyl-beta-D-glucosaminyl)}(N) <=> UDP + {(1,4)-(N-acetyl-beta-D-glucosaminyl)}(N+1).	.	.	.	.	.
PB.3063	PuSMRT_PB.3063.2_transcript417_f2p0_4687_g1,PuSMRT_PB.3063.4_transcript2732_f2p0_3300_g1	-	1-,2-	Alternative 3' splice site(A3SS)	gi|566163235|ref|XM_002304676.2|	4356	0	Populus trichocarpa hypothetical protein (POPTR_0003s17730g) mRNA, complete cds	Potri.003G178900	gi|566163236|ref|XP_002304712.2|	7123	0	hypothetical protein POPTR_0003s17730g [Populus trichocarpa]	Q76CU2	2070	0	Pleiotropic drug resistance protein 1	.	.	.	.	pfam01061	ABC2_membrane	ABC-2 type transporter.	GO:0006810|transport;	GO:0016021|integral component of membrane;	GO:0005524|ATP binding;GO:0016887|ATPase activity;	.	.
PB.3080	PuSMRT_PB.3080.1_transcript798_f2p0_4157_g1,PuSMRT_PB.3080.2_transcript14104_f2p0_1656_g1	-	0,1^2-	Retained intron(RI)	gi|566163315|ref|XM_002304698.2|	1627	0	Populus trichocarpa hypothetical protein (POPTR_0003s18200g) mRNA, complete cds	Potri.003G183800	gi|566163316|ref|XP_002304734.2|	1944	0	hypothetical protein POPTR_0003s18200g [Populus trichocarpa]	Q9SZ53	550	0	Probable protein phosphatase 2C 60	SPCC1223.11	246	1e-74	COG0631	pfam00481	PP2C	Protein phosphatase 2C. Protein phosphatase 2C is a Mn++ or Mg++ dependent protein serine/threonine phosphatase.	.	GO:0005886|plasma membrane;	GO:0046872|metal ion binding;GO:0004722|protein serine/threonine phosphatase activity;	K17499	PPM1G, PP2CG; protein phosphatase 1G [EC:3.1.3.16]
PB.3124	PuSMRT_PB.3124.1_transcript25859_f18p0_903_g1/PuSMRT_PB.3124.3_transcript28967_f3p0_790_g1/PuSMRT_PB.3124.4_transcript32128_f2p0_638_g1,PuSMRT_PB.3124.2_transcript25027_f3p0_957_g1	+	0,1-2^	Skipped exon(SE)	gi|566163680|ref|XM_006385948.1|	703	0	Populus trichocarpa hypothetical protein (POPTR_0003s20130g) mRNA, complete cds	Potri.003G202500	gi|743897674|ref|XP_011042131.1|	686	2e-87	PREDICTED: polyadenylate-binding protein-interacting protein 2-like [Populus euphratica]	Q94AR4	81.6	1e-17	Polyadenylate-binding protein-interacting protein 2	.	.	.	.	pfam07145	PAM2	Ataxin-2 C-terminal region. The PABP-interacting motif PAM2 has been identified in various eukaryotic proteins as an important binding site for pfam00658. It has been found in a wide range of eukaryotic proteins. Strikingly, this motif appears to occur solely outside of globular domains.	GO:0051301|cell division;GO:0006974|cellular response to DNA damage stimulus;GO:0051026|chiasma assembly;GO:0006281|DNA repair;GO:0000724|double-strand break repair via homologous recombination;GO:0007067|mitotic nuclear division;GO:0006312|mitotic recombination;	GO:0000794|condensed nuclear chromosome;GO:0048476|Holliday junction resolvase complex;GO:0005730|nucleolus;	GO:0008821|crossover junction endodeoxyribonuclease activity;GO:0003677|DNA binding;GO:0046872|metal ion binding;	.	.
PB.3128	PuSMRT_PB.3128.4_transcript2648_f2p0_3317_g1/PuSMRT_PB.3128.6_transcript2247_f3p0_3450_g1/PuSMRT_PB.3128.8_transcript3342_f3p0_3120_g1,PuSMRT_PB.3128.1_transcript2206_f2p0_3488_g1/PuSMRT_PB.3128.3_transcript2034_f8p0_3518_g1/PuSMRT_PB.3128.9_transcript4937_f2p0_2738_g1	-	1^,2^	Alternative 5' splice site(A5SS)	gi|566163713|ref|XM_006385955.1|	3514	0	Populus trichocarpa hypothetical protein (POPTR_0003s20310g) mRNA, complete cds	Potri.003G204300	gi|566163712|ref|XP_002303898.2|	3202	0	hypothetical protein POPTR_0003s20310g [Populus trichocarpa]	Q0D3J9	469	1e-146	Zinc finger CCCH domain-containing protein 53	.	.	.	.	pfam14259	RRM_6	RNA recognition motif (a.k.a. RRM, RBD, or RNP domain).	.	.	GO:0003677|DNA binding;GO:0046872|metal ion binding;GO:0000166|nucleotide binding;GO:0003723|RNA binding;	.	.
PB.3130	PuSMRT_PB.3130.2_transcript21300_f3p0_1178_g1/PuSMRT_PB.3130.3_transcript22687_f26p0_1069_g1,PuSMRT_PB.3130.1_transcript22750_f2p0_1078_g1	+	1-,2-	Alternative 3' splice site(A3SS)	.	.	.	.	.	.	.	.	.	.	.	.	.	.	.	.	.	.	.	.	.	.	.	.	.
PB.3137	PuSMRT_PB.3137.2_transcript12007_f4p0_1773_g1,PuSMRT_PB.3137.1_transcript13642_f5p0_1656_g1	-	1-,2-	Alternative 3' splice site(A3SS)	gi|566163992|ref|XM_002303990.2|	1821	0	Populus trichocarpa ENOYL-ACP REDUCTASE 1 family protein (POPTR_0003s21820g) mRNA, complete cds	Potri.003G212700	gi|224073212|ref|XP_002304026.1|	1886	0	ENOYL-ACP REDUCTASE 1 family protein [Populus trichocarpa]	Q9SLA8	553	0	Enoyl-[acyl-carrier-protein] reductase [NADH], chloroplastic	CPn0406	349	1e-114	COG0623	pfam13561	adh_short_C2	Enoyl-(Acyl carrier protein) reductase.	GO:0006633|fatty acid biosynthetic process;	GO:0009507|chloroplast;GO:0009941|chloroplast envelope;GO:0009570|chloroplast stroma;GO:0005835|fatty acid synthase complex;GO:0009579|thylakoid;	GO:0005507|copper ion binding;GO:0004318|enoyl-[acyl-carrier-protein] reductase (NADH) activity;GO:0016631|enoyl-[acyl-carrier-protein] reductase activity;	K00208	fabI; enoyl-[acyl-carrier protein] reductase I [EC:1.3.1.9 1.3.1.10]
PB.3173	PuSMRT_PB.3173.2_transcript7616_f4p0_2250_g1,PuSMRT_PB.3173.1_transcript7007_f2p0_2378_g1	+	0,1-2^	Skipped exon(SE)	gi|566163812|ref|XM_002304812.2|	2460	0	Populus trichocarpa Calmodulin-binding family protein (POPTR_0003s20810g) mRNA, complete cds	Potri.003G223000	gi|566163813|ref|XP_002304848.2|	2923	0	Calmodulin-binding family protein [Populus trichocarpa]	A2WNF5	583	0	Glucosidase 2 subunit beta	.	.	.	.	pfam12999	PRKCSH-like	Glucosidase II beta subunit-like. The sequences found in this family are similar to a region found in the beta-subunit of glucosidase II, which is also known as protein kinase C substrate 80K-H (PRKCSH). The enzyme catalyses the sequential removal of two alpha-1,3-linked glucose residues in the second step of N-linked oligosaccharide processing. The beta subunit is required for the solubility and…	GO:0006952|defense response;GO:0006491|N-glycan processing;	GO:0005783|endoplasmic reticulum;	.	.	.
PB.3185	PuSMRT_PB.3185.1_transcript7185_f2p0_2343_g1,PuSMRT_PB.3185.2_transcript9218_f3p0_2057_g1	+	1-,2-	Alternative 3' splice site(A3SS)	gi|743907178|ref|XM_011048712.1|	2152	0	PREDICTED: Populus euphratica E3 ubiquitin-protein ligase COP1-like (LOC105141480), transcript variant X1, mRNA	Potri.004G002700	gi|743907179|ref|XP_011047014.1|	3219	0	PREDICTED: E3 ubiquitin-protein ligase COP1-like isoform X1 [Populus euphratica]	P93471	899	0	E3 ubiquitin-protein ligase COP1	.	.	.	.	pfam13923	zf-C3HC4_2	Zinc finger, C3HC4 type (RING finger).	GO:0009585|red, far-red light phototransduction;	GO:0005737|cytoplasm;GO:0005634|nucleus;	GO:0016874|ligase activity;GO:0061630|ubiquitin protein ligase activity;GO:0008270|zinc ion binding;	.	.
PB.3185	PuSMRT_PB.3185.1_transcript7185_f2p0_2343_g1,PuSMRT_PB.3185.2_transcript9218_f3p0_2057_g1	+	0,1^2-	Retained intron(RI)	gi|743907178|ref|XM_011048712.1|	2152	0	PREDICTED: Populus euphratica E3 ubiquitin-protein ligase COP1-like (LOC105141480), transcript variant X1, mRNA	Potri.004G002700	gi|743907179|ref|XP_011047014.1|	3219	0	PREDICTED: E3 ubiquitin-protein ligase COP1-like isoform X1 [Populus euphratica]	P93471	899	0	E3 ubiquitin-protein ligase COP1	.	.	.	.	pfam13923	zf-C3HC4_2	Zinc finger, C3HC4 type (RING finger).	GO:0009585|red, far-red light phototransduction;	GO:0005737|cytoplasm;GO:0005634|nucleus;	GO:0016874|ligase activity;GO:0061630|ubiquitin protein ligase activity;GO:0008270|zinc ion binding;	.	.
PB.3209	PuSMRT_PB.3209.3_transcript1380_f2p0_3807_g1,PuSMRT_PB.3209.2_transcript1011_f17p0_3972_g1	-	1^,2^	Alternative 5' splice site(A5SS)	gi|743885694|ref|XM_011039327.1|	3878	0	PREDICTED: Populus euphratica starch synthase 3, chloroplastic/amyloplastic-like (LOC105134790), transcript variant X1, mRNA	Potri.004G014100	gi|743885695|ref|XP_011037629.1|	5846	0	PREDICTED: starch synthase 3, chloroplastic/amyloplastic-like [Populus euphratica]	Q43846	1531	0	Soluble starch synthase 3, chloroplastic/amyloplastic	alr0031	347	2e-104	COG0297	pfam08323	Glyco_transf_5	Starch synthase catalytic domain.	GO:0019252|starch biosynthetic process;	GO:0009501|amyloplast;GO:0009507|chloroplast;	GO:0033201|alpha-1,4-glucan synthase activity;GO:0004373|glycogen (starch) synthase activity;GO:2001070|starch binding;GO:0009011|starch synthase activity;	.	.
PB.321	PuSMRT_PB.321.4_transcript2798_f2p0_3286_g1,PuSMRT_PB.321.1_transcript1472_f7p0_3746_g1/PuSMRT_PB.321.2_transcript2365_f2p0_3446_g1/PuSMRT_PB.321.3_transcript2515_f14p0_3339_g1/PuSMRT_PB.321.5_transcript2256_f2p0_3463_g1	+	0,1^2-	Retained intron(RI)	gi|566148110|ref|XM_002297990.2|	3399	0	Populus trichocarpa peptidase M1 family protein (POPTR_0001s09600g) mRNA, complete cds	Potri.001G102100	gi|743852608|ref|XP_011029310.1|	4619	0	PREDICTED: puromycin-sensitive aminopeptidase-like isoform X1 [Populus euphratica]	Q8H0S9	1503	0	Puromycin-sensitive aminopeptidase	PA3083	854	0	COG0308	pfam11940	DUF3458	Domain of unknown function (DUF3458). This presumed domain is functionally uncharacterized. This domain is found in bacteria, archaea and eukaryotes. This domain is typically between 402 to 419 amino acids in length. This domain is found associated with pfam01433. This domain has a conserved FSAPV sequence motif.	GO:0043171|peptide catabolic process;GO:0006508|proteolysis;	GO:0005737|cytoplasm;GO:0005886|plasma membrane;	GO:0070006|metalloaminopeptidase activity;GO:0042277|peptide binding;GO:0008270|zinc ion binding;	K01256	pepN; aminopeptidase N [EC:3.4.11.2]
PB.3283	PuSMRT_PB.3283.1_transcript695_f2p0_4255_g1,PuSMRT_PB.3283.2_transcript904_f8p0_4078_g1/PuSMRT_PB.3283.3_transcript4307_f2p0_2873_g1/PuSMRT_PB.3283.4_transcript1067_f10p0_3945_g1/PuSMRT_PB.3283.5_transcript4097_f2p0_2926_g1	-	0,1^2-	Retained intron(RI)	gi|743846843|ref|XM_011029533.1|	3548	0	PREDICTED: Populus euphratica DNA-directed RNA polymerase II subunit RPB2 (LOC105128036), mRNA	Potri.004G043200	gi|743846844|ref|XP_011027835.1|	6017	0	PREDICTED: DNA-directed RNA polymerase II subunit RPB2 [Populus euphratica]	Q42877	2239	0	DNA-directed RNA polymerase II subunit RPB2	YOR151c	1446	0	COG0085	pfam00562	RNA_pol_Rpb2_6	RNA polymerase Rpb2, domain 6. RNA polymerases catalyse the DNA dependent polymerization of RNA. Prokaryotes contain a single RNA polymerase compared to three in eukaryotes (not including mitochondrial. and chloroplast polymerases). This domain represents the hybrid binding domain and the wall domain. The hybrid binding domain binds the nascent RNA strand / template DNA strand in the Pol II trans…	GO:0006366|transcription from RNA polymerase II promoter;	GO:0005665|DNA-directed RNA polymerase II, core complex;	GO:0003677|DNA binding;GO:0003899|DNA-directed RNA polymerase activity;GO:0046872|metal ion binding;GO:0032549|ribonucleoside binding;	K03010	RPB2, POLR2B; DNA-directed RNA polymerase II subunit RPB2 [EC:2.7.7.6]
PB.3283	PuSMRT_PB.3283.1_transcript695_f2p0_4255_g1,PuSMRT_PB.3283.2_transcript904_f8p0_4078_g1/PuSMRT_PB.3283.3_transcript4307_f2p0_2873_g1/PuSMRT_PB.3283.4_transcript1067_f10p0_3945_g1/PuSMRT_PB.3283.5_transcript4097_f2p0_2926_g1/PuSMRT_PB.3283.6_transcript17932_f2p0_1367_g1	-	0,1^2-	Retained intron(RI)	gi|743846843|ref|XM_011029533.1|	3548	0	PREDICTED: Populus euphratica DNA-directed RNA polymerase II subunit RPB2 (LOC105128036), mRNA	Potri.004G043200	gi|743846844|ref|XP_011027835.1|	6017	0	PREDICTED: DNA-directed RNA polymerase II subunit RPB2 [Populus euphratica]	Q42877	2239	0	DNA-directed RNA polymerase II subunit RPB2	YOR151c	1446	0	COG0085	pfam00562	RNA_pol_Rpb2_6	RNA polymerase Rpb2, domain 6. RNA polymerases catalyse the DNA dependent polymerization of RNA. Prokaryotes contain a single RNA polymerase compared to three in eukaryotes (not including mitochondrial. and chloroplast polymerases). This domain represents the hybrid binding domain and the wall domain. The hybrid binding domain binds the nascent RNA strand / template DNA strand in the Pol II trans…	GO:0006366|transcription from RNA polymerase II promoter;	GO:0005665|DNA-directed RNA polymerase II, core complex;	GO:0003677|DNA binding;GO:0003899|DNA-directed RNA polymerase activity;GO:0046872|metal ion binding;GO:0032549|ribonucleoside binding;	K03010	RPB2, POLR2B; DNA-directed RNA polymerase II subunit RPB2 [EC:2.7.7.6]
PB.3297	PuSMRT_PB.3297.1_transcript22430_f6p0_1095_g1/PuSMRT_PB.3297.3_transcript34350_f8p0_538_g1/PuSMRT_PB.3297.7_transcript29716_f123p0_685_g1,PuSMRT_PB.3297.5_transcript29421_f3p0_755_g1	-	0,1-2^	Skipped exon(SE)	gi|566164938|ref|XM_006383979.1|	1587	0	Populus trichocarpa hypothetical protein (POPTR_0004s04670g) mRNA, complete cds	Potri.004G047100	gi|566164939|ref|XP_006384041.1|	661	3e-80	hypothetical protein POPTR_0004s04670g [Populus trichocarpa]	B9DGG8	120	2e-30	Dormancy-associated protein 1	.	.	.	.	pfam05564	Auxin_repressed	Dormancy/auxin associated protein. This family contains several plant dormancy-associated and auxin-repressed proteins the function of which are poorly understood.	GO:0007275|multicellular organismal development;	.	.	.	.
PB.3315	PuSMRT_PB.3315.1_transcript24505_f2p0_988_g1,PuSMRT_PB.3315.2_transcript27509_f12p0_798_g1	+	0,1^2-	Retained intron(RI)	gi|566165017|ref|XM_002305731.2|	868	0	Populus trichocarpa hypothetical protein (POPTR_0004s05080g) mRNA, complete cds	Potri.004G051500	gi|224079145|ref|XP_002305767.1|	850	4e-112	hypothetical protein POPTR_0004s05080g [Populus trichocarpa]	.	.	.	.	.	.	.	.	pfam00407	Bet_v_1	Pathogenesis-related protein Bet v I family. This family is named after Bet v 1, the major birch pollen allergen. This protein belongs to family 10 of plant pathogenesis-related proteins (PR-10), cytoplasmic proteins of 15-17 kd that are wide-spread among dicotyledonous plants. In recent years, a number of diverse plant proteins with low sequence similarity to Bet v 1 was identified. A classifica…	.	.	.	.	.
PB.3319	PuSMRT_PB.3319.2_transcript2749_f3p0_3285_g1,PuSMRT_PB.3319.3_transcript3179_f2p0_3151_g1	-	0,1^2-	Retained intron(RI)	gi|743846375|ref|XM_011029431.1|	2382	0	PREDICTED: Populus euphratica glutamate receptor 2.7-like (LOC105127951), mRNA	Potri.004G052500	gi|566165031|ref|XP_002305093.2|	4808	0	hypothetical protein POPTR_0004s05180g [Populus trichocarpa]	O81078	446	8e-138	Glutamate receptor 2.9	.	.	.	.	pfam01094	ANF_receptor	Receptor family ligand binding region. This family includes extracellular ligand binding domains of a wide range of receptors. This family also includes the bacterial amino acid binding proteins of known structure.	GO:0006816|calcium ion transport;GO:0019722|calcium-mediated signaling;GO:0071230|cellular response to amino acid stimulus;	GO:0016021|integral component of membrane;GO:0005622|intracellular;GO:0005886|plasma membrane;	GO:0005262|calcium channel activity;GO:0008066|glutamate receptor activity;GO:0004970|ionotropic glutamate receptor activity;	K05387	GRIP; glutamate receptor, ionotropic, plant
PB.3352	PuSMRT_PB.3352.1_transcript14254_f2p0_1619_g1,PuSMRT_PB.3352.2_transcript15534_f14p0_1453_g1	-	0,1^2-	Retained intron(RI)	gi|566165230|ref|XM_002305008.2|	1523	0	Populus trichocarpa hypothetical protein (POPTR_0004s06400g) mRNA, complete cds	Potri.004G065200	gi|224076908|ref|XP_002305044.1|	1905	0	hypothetical protein POPTR_0004s06400g [Populus trichocarpa]	P05414	657	0	Peroxisomal (S)-2-hydroxy-acid oxidase	all0170	333	1e-108	COG1304	pfam01070	FMN_dh	FMN-dependent dehydrogenase.	GO:0009854|oxidative photosynthetic carbon pathway;	GO:0005777|peroxisome;	GO:0010181|FMN binding;GO:0052853|long-chain-(S)-2-hydroxy-long-chain-acid oxidase activity;GO:0052854|medium-chain-(S)-2-hydroxy-acid oxidase activity;GO:0052852|very-long-chain-(S)-2-hydroxy-acid oxidase activity;	.	.
PB.3384	PuSMRT_PB.3384.2_transcript11880_f2p0_1823_g1,PuSMRT_PB.3384.1_transcript12945_f2p0_1713_g1	-	1-,2-	Alternative 3' splice site(A3SS)	gi|566165421|ref|XM_006384062.1|	1789	0	Populus trichocarpa hypothetical protein (POPTR_0004s07420g) mRNA, complete cds	Potri.004G075700	gi|566165422|ref|XP_006384124.1|	1698	0	hypothetical protein POPTR_0004s07420g [Populus trichocarpa]	Q80SY5	169	6e-44	Pre-mRNA-splicing factor 38B	.	.	.	.	pfam03371	PRP38	PRP38 family. Members of this family are related to the pre mRNA splicing factor PRP38 from yeast. Therefore all the members of this family could be involved in splicing. This conserved region could be involved in RNA binding. The putative domain is about 180 amino acids in length. PRP38 is a unique component of the U4/U6.U5 tri-small nuclear ribonucleoprotein (snRNP) particle and is necessary fo…	GO:0006397|mRNA processing;GO:0008380|RNA splicing;	GO:0071011|precatalytic spliceosome;	GO:0044822|poly(A) RNA binding;	K12850	PRPF38B; pre-mRNA-splicing factor 38B
PB.3393	PuSMRT_PB.3393.1_transcript165_f3p0_5378_g1,PuSMRT_PB.3393.2_transcript211_f9p0_5109_g1/PuSMRT_PB.3393.3_transcript300_f7p0_4906_g1/PuSMRT_PB.3393.4_transcript418_f28p0_4591_g1/PuSMRT_PB.3393.5_transcript568_f8p0_4354_g1	+	0,1^2-	Retained intron(RI)	gi|566165473|ref|XM_002305877.2|	3986	0	Populus trichocarpa hypothetical protein (POPTR_0004s07720g) mRNA, complete cds	Potri.004G079000	gi|743901222|ref|XP_011043927.1|	5979	0	PREDICTED: uncharacterized protein LOC105139251 [Populus euphratica]	.	.	.	.	.	.	.	.	pfam03251	Tymo_45kd_70kd	Tymovirus 45/70Kd protein. Tymoviruses are single stranded RNA viruses. This family includes a protein of unknown function that has been named based on its molecular weight. Tymoviruses such as the ononis yellow mosaic tymovirus encode only three proteins. Of these two are overlapping this protein overlaps a larger ORF that is thought to be the polymerase.	.	.	.	.	.
PB.3405	PuSMRT_PB.3405.3_transcript6616_f8p0_2436_g1,PuSMRT_PB.3405.4_transcript7760_f2p0_2255_g1	-	1^,2^	Alternative 5' splice site(A5SS)	gi|566165532|ref|XM_002305194.2|	2433	0	Populus trichocarpa nicastrin-related family protein (POPTR_0004s08120g) mRNA, complete cds	Potri.004G082900	gi|566165533|ref|XP_002305230.2|	3249	0	nicastrin-related family protein [Populus trichocarpa]	Q8GUM5	838	0	Nicastrin	.	.	.	.	pfam05450	Nicastrin	Nicastrin. Nicastrin and presenilin are two major components of the gamma-secretase complex, which executes the intramembrane proteolysis of type I integral membrane proteins such as the amyloid precursor protein (APP) and Notch. Nicastrin is synthesized in fibroblasts and neurons as an endoglycosidase-H-sensitive glycosylated precursor protein (immature nicastrin) and is then modified by complex…	GO:0007219|Notch signaling pathway;GO:0016485|protein processing;	GO:0016021|integral component of membrane;	.	K06171	NCSTN; nicastrin
PB.3451	PuSMRT_PB.3451.1_transcript88_f2p0_5776_g1,PuSMRT_PB.3451.2_transcript413_f2p0_4706_g1	-	1^,2^	Alternative 5' splice site(A5SS)	.	.	.	.	.	.	.	.	.	.	.	.	.	.	.	.	.	.	.	.	.	.	.	.	.
PB.3451	PuSMRT_PB.3451.2_transcript413_f2p0_4706_g1,PuSMRT_PB.3451.1_transcript88_f2p0_5776_g1	-	1-,2-	Alternative 3' splice site(A3SS)	.	.	.	.	.	.	.	.	.	.	.	.	.	.	.	.	.	.	.	.	.	.	.	.	.
PB.3466	PuSMRT_PB.3466.2_transcript12156_f10p0_1757_g1,PuSMRT_PB.3466.1_transcript11225_f37p0_1841_g1	+	0,1-2^	Skipped exon(SE)	gi|566165954|ref|XM_002305259.2|	1745	0	Populus trichocarpa S-adenosylmethionine decarboxylase family protein (POPTR_0004s10660g) mRNA, complete cds	Potri.004G106800	gi|118486529|gb|ABK95104.1|	1862	0	unknown [Populus trichocarpa]	Q96471	520	2e-177	S-adenosylmethionine decarboxylase proenzyme	.	.	.	.	pfam01536	SAM_decarbox	Adenosylmethionine decarboxylase. This is a family of S-adenosylmethionine decarboxylase (SAMDC) proenzymes. In the biosynthesis of polyamines SAMDC produces decarboxylated S-adenosylmethionine, which serves as the aminopropyl moiety necessary for spermidine and spermine biosynthesis from putrescine. The Pfam alignment contains both the alpha and beta chains that are cleaved to form the active en…	GO:0006557|S-adenosylmethioninamine biosynthetic process;GO:0008295|spermidine biosynthetic process;GO:0006597|spermine biosynthetic process;	.	GO:0004014|adenosylmethionine decarboxylase activity;	.	.
PB.3469	PuSMRT_PB.3469.2_transcript9891_f4p0_1987_g1,PuSMRT_PB.3469.1_transcript16853_f5p0_1415_g1	+	0,1^2-	Retained intron(RI)	gi|166091644|gb|AC216913.1|	1974	0	Populus trichocarpa clone POP030-J10, complete sequence	Potri.004G108300	gi|224077570|ref|XP_002305307.1|	1079	3e-138	CONSTANS-like protein CO2 [Populus trichocarpa]	Q39057	206	5e-58	Zinc finger protein CONSTANS	.	.	.	.	pfam06203	CCT	CCT motif. This short motif is found in a number of plant proteins. It is rich in basic amino acids and has been called a CCT motif after Co, Col and Toc1. The CCT motif is about 45 amino acids long and contains a putative nuclear localisation signal within the second half of the CCT motif. Toc1 mutants have been identified in this region.	GO:0030154|cell differentiation;GO:0010018|far-red light signaling pathway;GO:0009908|flower development;GO:0009909|regulation of flower development;GO:0010218|response to far red light;GO:0006351|transcription, DNA-templated;	GO:0005634|nucleus;	GO:0003677|DNA binding;GO:0003700|transcription factor activity, sequence-specific DNA binding;GO:0008270|zinc ion binding;	K12135	CO; zinc finger protein CONSTANS
PB.3507	PuSMRT_PB.3507.1_transcript1943_f2p0_3576_g1,PuSMRT_PB.3507.2_transcript5899_f4p0_2523_g1	+	0,1^2-	Retained intron(RI)	gi|566166237|ref|XM_002305330.2|	1651	0	Populus trichocarpa hypothetical protein (POPTR_0004s12220g) mRNA, complete cds	Potri.004G123400	gi|566166232|ref|XP_006384310.1|	2685	0	hypothetical protein POPTR_0004s12220g [Populus trichocarpa]	P58223	160	6e-41	KH domain-containing protein At4g18375	.	.	.	.	pfam00013	KH_1	KH domain. KH motifs bind RNA in vitro. Autoantibodies to Nova, a KH domain protein, cause paraneoplastic opsoclonus ataxia.	.	GO:0005634|nucleus;	GO:0003723|RNA binding;	K13162	PCBP2_3_4; poly(rC)-binding protein 2/3/4
PB.3513	PuSMRT_PB.3513.2_transcript2866_f3p0_3252_g1,PuSMRT_PB.3513.1_transcript2448_f2p0_3386_g1	+	0,1-2^	Skipped exon(SE)	gi|566166256|ref|XM_002305340.2|	3387	0	Populus trichocarpa hypothetical protein (POPTR_0004s12360g) mRNA, complete cds	Potri.004G124800	gi|224077716|ref|XP_002305376.1|	4926	0	hypothetical protein POPTR_0004s12360g [Populus trichocarpa]	Q9LF37	1566	0	Chaperone protein ClpB3, chloroplastic	alr5084	1151	0	COG0542	pfam07724	AAA_2	AAA domain (Cdc48 subfamily). This Pfam entry includes some of the AAA proteins not detected by the pfam00004 model.	GO:0009658|chloroplast organization;GO:0016485|protein processing;GO:0009408|response to heat;	GO:0009507|chloroplast;GO:0009570|chloroplast stroma;GO:0009532|plastid stroma;	GO:0005524|ATP binding;	K03695	clpB; ATP-dependent Clp protease ATP-binding subunit ClpB
PB.3526	PuSMRT_PB.3526.2_transcript30450_f2p0_711_g1,PuSMRT_PB.3526.1_transcript31658_f16p0_626_g1	+	0,1^2-	Retained intron(RI)	gi|566166390|ref|XM_002305300.2|	636	0	Populus trichocarpa prefoldin family protein (POPTR_0004s13700g) mRNA, complete cds	Potri.004G131900	gi|566166391|ref|XP_002305336.2|	651	1e-83	prefoldin family protein [Populus trichocarpa]	Q03958	99.4	2e-24	Prefoldin subunit 6	YLR200w	60.1	6e-11	COG1382	pfam01920	Prefoldin_2	Prefoldin subunit. This family includes prefoldin subunits that are not detected by pfam02996.	GO:0051131|chaperone-mediated protein complex assembly;GO:0006457|protein folding;	GO:0005737|cytoplasm;GO:0005634|nucleus;GO:0016272|prefoldin complex;	GO:0051087|chaperone binding;	K04798	pfdB, PFDN6; prefoldin beta subunit
PB.3570	PuSMRT_PB.3570.1_transcript1425_f2p0_3766_g1,PuSMRT_PB.3570.2_transcript1523_f4p0_3692_g1	+	1^,2^	Alternative 5' splice site(A5SS)	gi|566166682|ref|XM_006384408.1|	3643	0	Populus trichocarpa hypothetical protein (POPTR_0004s15370g) mRNA, complete cds	Potri.004G146600	gi|566166683|ref|XP_006384470.1|	5409	0	hypothetical protein POPTR_0004s15370g [Populus trichocarpa]	.	.	.	.	.	.	.	.	pfam02194	PXA	PXA domain. This domain is associated with PX domains pfam00787.	.	.	.	.	.
PB.3589	PuSMRT_PB.3589.1_transcript2943_f2p0_3319_g1,PuSMRT_PB.3589.2_transcript2968_f18p0_3191_g1	+	0,1^2-	Retained intron(RI)	gi|566166803|ref|XM_002305388.2|	3155	0	Populus trichocarpa hypothetical protein (POPTR_0004s16090g) mRNA, complete cds	Potri.004G153500	gi|224077826|ref|XP_002305424.1|	4096	0	hypothetical protein POPTR_0004s16090g [Populus trichocarpa]	Q0WW26	1397	0	Coatomer subunit gamma	SPAC57A7.10c	544	3e-174	COG5240	pfam01602	Adaptin_N	Adaptin N terminal region. This family consists of the N terminal region of various alpha, beta and gamma subunits of the AP-1, AP-2 and AP-3 adaptor protein complexes. The adaptor protein (AP) complexes are involved in the formation of clathrin-coated pits and vesicles. The N-terminal region of the various adaptor proteins (APs) is constant by comparison to the C-terminal which is variable withi…	GO:0006886|intracellular protein transport;GO:0016192|vesicle-mediated transport;	GO:0009507|chloroplast;GO:0030126|COPI vesicle coat;GO:0005829|cytosol;GO:0000139|Golgi membrane;GO:0016020|membrane;GO:0005886|plasma membrane;GO:0009506|plasmodesma;	GO:0005198|structural molecule activity;	K17267	COPG; coatomer protein complex, subunit gamma
PB.3596	PuSMRT_PB.3596.1_transcript23491_f23p0_971_g1,PuSMRT_PB.3596.2_transcript26868_f13p0_863_g1	+	0,1^2-	Retained intron(RI)	gi|224077835|ref|XM_002305393.1|	748	0	Populus trichocarpa glycine-rich RNA-binding family protein (POPTR_0004s16260g) mRNA, complete cds	Potri.004G155300	gi|224077836|ref|XP_002305429.1|	451	5e-52	glycine-rich RNA-binding family protein [Populus trichocarpa]	Q03878	149	2e-42	Glycine-rich RNA-binding protein	.	.	.	.	pfam00076	RRM_1	RNA recognition motif. (a.k.a. RRM, RBD, or RNP domain). The RRM motif is probably diagnostic of an RNA binding protein. RRMs are found in a variety of RNA binding proteins, including various hnRNP proteins, proteins implicated in regulation of alternative splicing, and protein components of snRNPs. The motif also appears in a few single stranded DNA binding proteins. The RRM structure consists o…	.	.	GO:0000166|nucleotide binding;GO:0003723|RNA binding;	.	.
PB.3596	PuSMRT_PB.3596.1_transcript23491_f23p0_971_g1,PuSMRT_PB.3596.3_transcript29665_f117p0_723_g1	+	0,1^2-	Retained intron(RI)	gi|224077835|ref|XM_002305393.1|	748	0	Populus trichocarpa glycine-rich RNA-binding family protein (POPTR_0004s16260g) mRNA, complete cds	Potri.004G155300	gi|224077836|ref|XP_002305429.1|	451	5e-52	glycine-rich RNA-binding family protein [Populus trichocarpa]	Q03878	149	2e-42	Glycine-rich RNA-binding protein	.	.	.	.	pfam00076	RRM_1	RNA recognition motif. (a.k.a. RRM, RBD, or RNP domain). The RRM motif is probably diagnostic of an RNA binding protein. RRMs are found in a variety of RNA binding proteins, including various hnRNP proteins, proteins implicated in regulation of alternative splicing, and protein components of snRNPs. The motif also appears in a few single stranded DNA binding proteins. The RRM structure consists o…	.	.	GO:0000166|nucleotide binding;GO:0003723|RNA binding;	.	.
PB.3596	PuSMRT_PB.3596.3_transcript29665_f117p0_723_g1,PuSMRT_PB.3596.2_transcript26868_f13p0_863_g1	+	1^,2^	Alternative 5' splice site(A5SS)	gi|224077835|ref|XM_002305393.1|	748	0	Populus trichocarpa glycine-rich RNA-binding family protein (POPTR_0004s16260g) mRNA, complete cds	Potri.004G155300	gi|224077836|ref|XP_002305429.1|	451	5e-52	glycine-rich RNA-binding family protein [Populus trichocarpa]	Q03878	149	2e-42	Glycine-rich RNA-binding protein	.	.	.	.	pfam00076	RRM_1	RNA recognition motif. (a.k.a. RRM, RBD, or RNP domain). The RRM motif is probably diagnostic of an RNA binding protein. RRMs are found in a variety of RNA binding proteins, including various hnRNP proteins, proteins implicated in regulation of alternative splicing, and protein components of snRNPs. The motif also appears in a few single stranded DNA binding proteins. The RRM structure consists o…	.	.	GO:0000166|nucleotide binding;GO:0003723|RNA binding;	.	.
PB.3602	PuSMRT_PB.3602.2_transcript3626_f5p0_3045_g1,PuSMRT_PB.3602.1_transcript3529_f2p0_3074_g1	+	1-,2-	Alternative 3' splice site(A3SS)	gi|743885224|ref|XM_011039199.1|	2648	0	PREDICTED: Populus euphratica uncharacterized LOC105134689 (LOC105134689), transcript variant X4, mRNA	Potri.004G157000	gi|566166856|ref|XP_002305437.2|	3602	0	hypothetical protein POPTR_0004s16430g [Populus trichocarpa]	Q84V03	110	4e-23	F-box protein At2g16365	.	.	.	.	pfam01255	Prenyltransf	Putative undecaprenyl diphosphate synthase. Previously known as uncharacterized protein family UPF0015, a single member of this family has been identified as an undecaprenyl diphosphate synthase.	GO:0006284|base-excision repair;GO:0009658|chloroplast organization;GO:0048512|circadian behavior;GO:0032508|DNA duplex unwinding;GO:0006310|DNA recombination;GO:0006260|DNA replication;GO:0006302|double-strand break repair;GO:0045893|positive regulation of transcription, DNA-templated;GO:0080167|response to karrikin;	GO:0005694|chromosome;GO:0005737|cytoplasm;GO:0005634|nucleus;	GO:0043140|ATP-dependent 3'-5' DNA helicase activity;GO:0003677|DNA binding;GO:0009378|four-way junction helicase activity;	.	.
PB.3613	PuSMRT_PB.3613.4_transcript5500_f2p0_2729_g1,PuSMRT_PB.3613.2_transcript3604_f2p0_3070_g1	-	1^,2^	Alternative 5' splice site(A5SS)	gi|566166917|ref|XM_002306092.2|	3112	0	Populus trichocarpa vacuolar proton ATPase family protein (POPTR_0004s16750g) mRNA, complete cds	Potri.004G160400	gi|224080403|ref|XP_002306128.1|	4116	0	vacuolar proton ATPase family protein [Populus trichocarpa]	Q8W4S4	1245	0	V-type proton ATPase subunit a3	SPAC16E8.07c	478	5e-152	COG1269	pfam01496	V_ATPase_I	V-type ATPase 116kDa subunit family. This family consists of the 116kDa V-type ATPase (vacuolar (H+)-ATPases) subunits, as well as V-type ATP synthase subunit i. The V-type ATPases family are proton pumps that acidify intracellular compartments in eukaryotic cells for example yeast central vacuoles, clathrin-coated and synaptic vesicles. They have important roles in membrane trafficking processes…	GO:0015991|ATP hydrolysis coupled proton transport;GO:0015986|ATP synthesis coupled proton transport;GO:0032119|sequestering of zinc ion;GO:0007035|vacuolar acidification;GO:0070072|vacuolar proton-transporting V-type ATPase complex assembly;GO:0043181|vacuolar sequestering;	GO:0009507|chloroplast;GO:0009941|chloroplast envelope;GO:0005794|Golgi apparatus;GO:0016021|integral component of membrane;GO:0016020|membrane;GO:0000325|plant-type vacuole;GO:0009705|plant-type vacuole membrane;GO:0005886|plasma membrane;GO:0005774|vacuolar membrane;GO:0016471|vacuolar proton-transporting V-type ATPase complex;GO:0000220|vacuolar proton-transporting V-type ATPase, V0 domain;GO:…	GO:0051117|ATPase binding;GO:0009678|hydrogen-translocating pyrophosphatase activity;GO:0045735|nutrient reservoir activity;GO:0046961|proton-transporting ATPase activity, rotational mechanism;	K02154	ATPeV0A, ATP6N; V-type H+-transporting ATPase subunit a
PB.3629	PuSMRT_PB.3629.1_transcript5222_f2p0_2686_g1/PuSMRT_PB.3629.3_transcript20168_f2p0_1214_g1,PuSMRT_PB.3629.2_transcript5955_f5p0_2532_g1/PuSMRT_PB.3629.4_transcript22354_f3p0_1103_g1	+	0,1^2-	Retained intron(RI)	gi|566166978|ref|XM_002305432.2|	2576	0	Populus trichocarpa hypothetical protein (POPTR_0004s17080g) mRNA, complete cds	Potri.004G163800	gi|566166979|ref|XP_002305468.2|	2473	0	hypothetical protein POPTR_0004s17080g [Populus trichocarpa]	Q6S4P4	135	6e-33	Transcription factor RF2b	.	.	.	.	pfam07716	bZIP_2	Basic region leucine zipper.	GO:0006351|transcription, DNA-templated;	GO:0005829|cytosol;GO:0005634|nucleus;	GO:0043565|sequence-specific DNA binding;GO:0003700|transcription factor activity, sequence-specific DNA binding;	.	.
PB.3777	PuSMRT_PB.3777.8_transcript14519_f9p0_1573_g1,PuSMRT_PB.3777.13_transcript17212_f2p0_1418_g1/PuSMRT_PB.3777.1_transcript16022_f2p0_1481_g1	-	1-,2-	Alternative 3' splice site(A3SS)	gi|566167924|ref|XM_006384827.1|	1105	0	Populus trichocarpa hypothetical protein (POPTR_0004s21970g) mRNA, complete cds	Potri.004G210000	gi|566167925|ref|XP_006384889.1|	1167	1e-151	hypothetical protein POPTR_0004s21970g [Populus trichocarpa]	Q9SAR5	278	1e-108	Ankyrin repeat domain-containing protein 2A	.	.	.	.	pfam12796	Ank_2	Ankyrin repeats (3 copies).	.	GO:0009707|chloroplast outer membrane;GO:0005737|cytoplasm;GO:0005634|nucleus;	GO:0030941|chloroplast targeting sequence binding;GO:0051861|glycolipid binding;	.	.
PB.3778	PuSMRT_PB.3778.1_transcript2474_f2p0_3386_g1,PuSMRT_PB.3778.2_transcript2491_f3p0_3361_g1/PuSMRT_PB.3778.3_transcript2603_f3p0_3335_g1	-	1-,2-	Alternative 3' splice site(A3SS)	gi|566167934|ref|XM_006384832.1|	3438	0	Populus trichocarpa hypothetical protein (POPTR_0004s21990g) mRNA, complete cds	Potri.004G210200	gi|566167935|ref|XP_006384894.1|	4496	0	hypothetical protein POPTR_0004s21990g [Populus trichocarpa]	Q680Q4	1065	0	E3 SUMO-protein ligase SIZ1	.	.	.	.	pfam02891	zf-MIZ	MIZ/SP-RING zinc finger. This domain has SUMO (small ubiquitin-like modifier) ligase activity and is involved in DNA repair and chromosome organisation.	GO:0051301|cell division;GO:0016049|cell growth;GO:0031668|cellular response to extracellular stimulus;GO:0016036|cellular response to phosphate starvation;GO:0006952|defense response;GO:0010247|detection of phosphate ion;GO:0048589|developmental growth;GO:0009553|embryo sac development;GO:0009908|flower development;GO:0010286|heat acclimation;GO:0009910|negative regulation of flower development;…	GO:0016607|nuclear speck;GO:0005634|nucleus;	GO:0016874|ligase activity;GO:0019789|SUMO transferase activity;GO:0008270|zinc ion binding;	.	.
PB.3778	PuSMRT_PB.3778.1_transcript2474_f2p0_3386_g1/PuSMRT_PB.3778.3_transcript2603_f3p0_3335_g1,PuSMRT_PB.3778.2_transcript2491_f3p0_3361_g1	-	1-,2-	Alternative 3' splice site(A3SS)	gi|566167934|ref|XM_006384832.1|	3438	0	Populus trichocarpa hypothetical protein (POPTR_0004s21990g) mRNA, complete cds	Potri.004G210200	gi|566167935|ref|XP_006384894.1|	4496	0	hypothetical protein POPTR_0004s21990g [Populus trichocarpa]	Q680Q4	1065	0	E3 SUMO-protein ligase SIZ1	.	.	.	.	pfam02891	zf-MIZ	MIZ/SP-RING zinc finger. This domain has SUMO (small ubiquitin-like modifier) ligase activity and is involved in DNA repair and chromosome organisation.	GO:0051301|cell division;GO:0016049|cell growth;GO:0031668|cellular response to extracellular stimulus;GO:0016036|cellular response to phosphate starvation;GO:0006952|defense response;GO:0010247|detection of phosphate ion;GO:0048589|developmental growth;GO:0009553|embryo sac development;GO:0009908|flower development;GO:0010286|heat acclimation;GO:0009910|negative regulation of flower development;…	GO:0016607|nuclear speck;GO:0005634|nucleus;	GO:0016874|ligase activity;GO:0019789|SUMO transferase activity;GO:0008270|zinc ion binding;	.	.
PB.3852	PuSMRT_PB.3852.6_transcript2685_f2p0_3335_g1,PuSMRT_PB.3852.3_transcript2693_f9p0_3303_g1/PuSMRT_PB.3852.7_transcript9726_f3p0_2091_g1	-	0,1^2-	Retained intron(RI)	gi|566168381|ref|XM_006385054.1|	3151	0	Populus trichocarpa leucine-rich repeat family protein (POPTR_0004s24070g) mRNA, complete cds	Potri.004G232400	gi|566168382|ref|XP_006385116.1|	4766	0	leucine-rich repeat family protein [Populus trichocarpa]	Q9LT96	926	0	Probable leucine-rich repeat receptor-like protein kinase At5g49770	.	.	.	.	pfam00069	Pkinase	Protein kinase domain.	.	GO:0016021|integral component of membrane;	GO:0005524|ATP binding;GO:0004674|protein serine/threonine kinase activity;	.	.
PB.3865	PuSMRT_PB.3865.1_transcript1792_f4p0_3588_g1,PuSMRT_PB.3865.2_transcript5110_f2p0_2705_g1	+	1-,2-	Alternative 3' splice site(A3SS)	gi|566168455|ref|XM_006385091.1|	3722	0	Populus trichocarpa hypothetical protein (POPTR_0004s24340g) mRNA, complete cds	Potri.004G235200	gi|566168454|ref|XP_006385152.1|	5175	0	epsilon-adaptin family protein [Populus trichocarpa]	Q8L7A9	1394	0	AP-4 complex subunit epsilon	.	.	.	.	pfam01602	Adaptin_N	Adaptin N terminal region. This family consists of the N terminal region of various alpha, beta and gamma subunits of the AP-1, AP-2 and AP-3 adaptor protein complexes. The adaptor protein (AP) complexes are involved in the formation of clathrin-coated pits and vesicles. The N-terminal region of the various adaptor proteins (APs) is constant by comparison to the C-terminal which is variable withi…	GO:0006886|intracellular protein transport;GO:0016192|vesicle-mediated transport;	GO:0030124|AP-4 adaptor complex;GO:0005905|coated pit;GO:0005829|cytosol;GO:0005794|Golgi apparatus;GO:0009506|plasmodesma;	.	K12400	AP4E1; AP-4 complex subunit epsilon-1
PB.3870	PuSMRT_PB.3870.2_transcript5970_f4p0_2468_g1,PuSMRT_PB.3870.1_transcript5573_f2p0_2615_g1	+	1^,2^	Alternative 5' splice site(A5SS)	gi|743849572|ref|XM_011030202.1|	2303	0	PREDICTED: Populus euphratica uncharacterized LOC105128495 (LOC105128495), transcript variant X1, mRNA	Potri.004G235800	gi|743849573|ref|XP_011028504.1|	3214	0	PREDICTED: uncharacterized protein LOC105128495 isoform X1 [Populus euphratica]	Q8VXZ5	976	0	Arabinosyltransferase XEG113	.	.	.	.	pfam03407	Nucleotid_trans	Nucleotide-diphospho-sugar transferase. Proteins in this family have been been predicted to be nucleotide-diphospho-sugar transferases.	GO:0052325|cell wall pectin biosynthetic process;GO:0006486|protein glycosylation;GO:0080147|root hair cell development;	GO:0005768|endosome;GO:0005794|Golgi apparatus;GO:0000139|Golgi membrane;GO:0016021|integral component of membrane;GO:0005802|trans-Golgi network;	GO:0052636|arabinosyltransferase activity;	.	.
PB.3871	PuSMRT_PB.3871.3_transcript6765_f2p0_2417_g1,PuSMRT_PB.3871.1_transcript5817_f2p0_2569_g1/PuSMRT_PB.3871.2_transcript6661_f7p0_2392_g1	-	0,1^2-	Retained intron(RI)	gi|566168467|ref|XM_006385097.1|	2440	0	Populus trichocarpa RNase L inhibitor family protein (POPTR_0004s24400g) mRNA, complete cds	Potri.004G235900	gi|743849579|ref|XP_011028506.1|	3222	0	PREDICTED: ABC transporter E family member 2 [Populus euphratica]	Q8LPJ4	1170	0	ABC transporter E family member 2	YDR091c	863	0	COG1245	pfam00005	ABC_tran	ABC transporter. ABC transporters for a large family of proteins responsible for translocation of a variety of compounds across biological membranes. ABC transporters are the largest family of proteins in many completely sequenced bacteria. ABC transporters are composed of two copies of this domain and two copies of a transmembrane domain pfam00664. These four domains may belong to a single polyp…	GO:0000054|ribosomal subunit export from nucleus;GO:0006413|translational initiation;GO:0006415|translational termination;	GO:0005623|cell;GO:0016020|membrane;	GO:0051539|4 iron, 4 sulfur cluster binding;GO:0005524|ATP binding;GO:0016887|ATPase activity;GO:0005506|iron ion binding;GO:0043024|ribosomal small subunit binding;GO:0005215|transporter activity;	K06174	ABCE1; ATP-binding cassette, sub-family E, member 1
PB.3891	PuSMRT_PB.3891.2_transcript34546_f21p0_522_g1,PuSMRT_PB.3891.1_transcript33337_f3p0_593_g1	+	1^,2^	Alternative 5' splice site(A5SS)	gi|566168544|ref|XM_006382195.1|	809	0	Populus trichocarpa hypothetical protein (POPTR_0005s00400g) mRNA, complete cds	Potri.005G002200	gi|566168545|ref|XP_006382257.1|	553	1e-68	hypothetical protein POPTR_0005s00400g [Populus trichocarpa]	Q8H5T6	51.6	2e-07	Hydrophobic protein LTI6A	.	.	.	.	pfam01679	Pmp3	Proteolipid membrane potential modulator. Pmp3 is an evolutionarily conserved proteolipid in the plasma membrane which, in S. pombe, is transcriptionally regulated by the Spc1 stress MAPK (mitogen-activated protein kinases) pathway. It functions to modulate the membrane potential, particularly to resist high cellular cation concentration. In eukaryotic organisms, stress-activated mitogen-activate…	GO:0009737|response to abscisic acid;GO:0009409|response to cold;GO:0009651|response to salt stress;GO:0009414|response to water deprivation;	GO:0016021|integral component of membrane;GO:0005886|plasma membrane;	.	.	.
PB.3914	PuSMRT_PB.3914.3_transcript7988_f2p0_2223_g1,PuSMRT_PB.3914.1_transcript13901_f6p0_1633_g1/PuSMRT_PB.3914.2_transcript15324_f43p0_1515_g1/PuSMRT_PB.3914.4_transcript18164_f4p0_1310_g1/PuSMRT_PB.3914.5_transcript28602_f2p0_799_g1/PuSMRT_PB.3914.6_transcript31016_f2p0_688_g1/PuSMRT_PB.3914.7_transcript33983_f3p0_561_g1/PuSMRT_PB.3914.8_transcript34039_f5p0_482_g1	+	0,1^2-	Retained intron(RI)	gi|566168858|ref|XM_006382344.1|	1403	0	Populus trichocarpa calreticulin family protein (POPTR_0005s01850g) mRNA, complete cds	Potri.005G015100	gi|566168859|ref|XP_006382406.1|	1672	0	calreticulin family protein [Populus trichocarpa]	P93508	587	0	Calreticulin	.	.	.	.	pfam00262	Calreticulin	Calreticulin family.	GO:0006457|protein folding;	GO:0005788|endoplasmic reticulum lumen;	GO:0005509|calcium ion binding;GO:0030246|carbohydrate binding;	K08057	CALR; calreticulin
PB.3918	PuSMRT_PB.3918.7_transcript16280_f2p0_1454_g1,PuSMRT_PB.3918.1_transcript4351_f2p0_2875_g1/PuSMRT_PB.3918.2_transcript5283_f2p0_2695_g1/PuSMRT_PB.3918.3_transcript4616_f3p0_2800_g1/PuSMRT_PB.3918.4_transcript5439_f4p0_2642_g1/PuSMRT_PB.3918.5_transcript10835_f2p0_1910_g1/PuSMRT_PB.3918.6_transcript13708_f2p0_1659_g1	+	0,1-2^	Skipped exon(SE)	gi|743883122|ref|XM_011038642.1|	2590	0	PREDICTED: Populus euphratica pyrophosphate-energized vacuolar membrane proton pump 1-like (LOC105134291), mRNA	Potri.005G018700	gi|566168857|ref|XP_006382405.1|	3802	0	inorganic pyrophosphatase family protein [Populus trichocarpa]	P31414	1248	0	Pyrophosphate-energized vacuolar membrane proton pump 1	MA3879	551	0	COG3808	pfam03030	H_PPase	Inorganic H+ pyrophosphatase. The H+ pyrophosphatase is an transmembrane proton pump involved in establishing the H+ electrochemical potential difference between the vacuole lumen and the cell cytosol. Vacuolar-type H(+)-translocating inorganic pyrophosphatases have long been considered to be restricted to plants and to a few species of photo-trophic bacteria. However, in recent investigations, t…	GO:0009926|auxin polar transport;GO:0010248|establishment or maintenance of transmembrane electrochemical gradient;GO:0048366|leaf development;GO:0015992|proton transport;GO:0009651|response to salt stress;GO:0009414|response to water deprivation;	GO:0009507|chloroplast;GO:0009941|chloroplast envelope;GO:0010008|endosome membrane;GO:0005794|Golgi apparatus;GO:0016021|integral component of membrane;GO:0016020|membrane;GO:0005739|mitochondrion;GO:0000325|plant-type vacuole;GO:0009705|plant-type vacuole membrane;GO:0005886|plasma membrane;GO:0005774|vacuolar membrane;GO:0005773|vacuole;	GO:0009678|hydrogen-translocating pyrophosphatase activity;GO:0004427|inorganic diphosphatase activity;GO:0046872|metal ion binding;	K01507	ppa; inorganic pyrophosphatase [EC:3.6.1.1]
PB.3939	PuSMRT_PB.3939.3_transcript34252_f2p0_547_g1,PuSMRT_PB.3939.2_transcript29711_f9p0_708_g1	-	1-,2-	Alternative 3' splice site(A3SS)	gi|566168974|ref|XM_006382401.1|	683	0	Populus trichocarpa hypothetical protein (POPTR_0005s02400g) mRNA, complete cds	Potri.005G024200	gi|566168975|ref|XP_006382463.1|	1077	2e-139	hypothetical protein POPTR_0005s02400g [Populus trichocarpa]	Q8LD26	87.8	2e-18	Dormancy-associated protein homolog 3	.	.	.	.	pfam03024	Folate_rec	Folate receptor family. This family includes the folate receptor which binds to folate and reduced folic acid derivatives and mediates delivery of 5-methyltetrahydrofolate to the interior of cells. These proteins are attached to the membrane by a GPI-anchor. The proteins contain 16 conserved cysteines that form eight disulphide bridges.	.	.	GO:0046872|metal ion binding;GO:0004721|phosphoprotein phosphatase activity;	.	.
PB.3960	PuSMRT_PB.3960.2_transcript4448_f13p0_2826_g1,PuSMRT_PB.3960.1_transcript3994_f2p0_3044_g1	+	1-2^,3-4^	Mutually exclusive exons(MXE)	gi|566169240|ref|XM_006382532.1|	2824	0	Populus trichocarpa hypothetical protein (POPTR_0005s03560g) mRNA, complete cds	Potri.005G032700	gi|566169241|ref|XP_006382594.1|	4612	0	hypothetical protein POPTR_0005s03560g [Populus trichocarpa]	Q43191	1387	0	Probable linoleate 9S-lipoxygenase 5	.	.	.	.	pfam00305	Lipoxygenase	Lipoxygenase.	GO:0006633|fatty acid biosynthetic process;GO:0031408|oxylipin biosynthetic process;	GO:0005737|cytoplasm;	GO:0046872|metal ion binding;GO:0016702|oxidoreductase activity, acting on single donors with incorporation of molecular oxygen, incorporation of two atoms of oxygen;	K15718	LOX1_5; linoleate 9S-lipoxygenase [EC:1.13.11.58]
PB.3991	PuSMRT_PB.3991.2_transcript27313_f6p0_852_g1/PuSMRT_PB.3991.7_transcript29092_f5p0_742_g1,PuSMRT_PB.3991.1_transcript26635_f3p0_887_g1/PuSMRT_PB.3991.5_transcript28240_f13p0_778_g1	-	1-,2-	Alternative 3' splice site(A3SS)	gi|157410317|gb|AC210556.1|	884	0	Populus trichocarpa clone POP120-A02, complete sequence	Potri.005G044400	gi|118482058|gb|ABK92960.1|	743	6e-94	unknown [Populus trichocarpa]	Q8L5E0	268	2e-86	Superoxide dismutase [Cu-Zn] 2	YJR104c	149	2e-41	COG2032	pfam00080	Sod_Cu	Copper/zinc superoxide dismutase (SODC). superoxide dismutases (SODs) catalyse the conversion of superoxide radicals to hydrogen peroxide and molecular oxygen. Three evolutionarily distinct families of SODs are known, of which the copper/zinc-binding family is one. Defects in the human SOD1 gene cause familial amyotrophic lateral sclerosis (Lou Gehrig's disease). Structure is an eight-stranded be…	.	GO:0005783|endoplasmic reticulum;	GO:0046872|metal ion binding;GO:0004784|superoxide dismutase activity;	.	.
PB.3997	PuSMRT_PB.3997.3_transcript12326_f4p0_1694_g1,PuSMRT_PB.3997.2_transcript9231_f5p0_2077_g1/PuSMRT_PB.3997.6_transcript14173_f4p0_1610_g1	-	0,1-2^	Skipped exon(SE)	gi|566169488|ref|XM_006382652.1|	2081	0	Populus trichocarpa hypothetical protein (POPTR_0005s04710g) mRNA, complete cds	Potri.005G045600	gi|566169489|ref|XP_006382714.1|	2533	0	hypothetical protein POPTR_0005s04710g [Populus trichocarpa]	O04658	768	0	Probable nucleolar protein 5-1	SPAC23G3.06	495	1e-166	COG1498	pfam01798	Nop	Putative snoRNA binding domain. This family consists of various Pre RNA processing ribonucleoproteins. The function of the aligned region is unknown however it may be a common RNA or snoRNA or Nop1p binding domain. Nop5p (Nop58p) from yeast is the protein component of a ribonucleoprotein protein required for pre-18s rRNA processing and is suggested to function with Nop1p in a snoRNA complex. Nop5…	GO:0000154|rRNA modification;	GO:0031428|box C/D snoRNP complex;GO:0005730|nucleolus;GO:0009506|plasmodesma;GO:0032040|small-subunit processome;	GO:0030515|snoRNA binding;	K14565	NOP58; nucleolar protein 58
PB.4002	PuSMRT_PB.4002.1_transcript2013_f2p0_3533_g1,PuSMRT_PB.4002.2_transcript3392_f4p0_3100_g1	-	1-,2-	Alternative 3' splice site(A3SS)	gi|566169532|ref|XM_006382674.1|	2709	0	Populus trichocarpa CTR2 protein kinase (POPTR_0005s04910g) mRNA, complete cds	Potri.005G047600	gi|566169533|ref|XP_006382736.1|	4241	0	CTR2 protein kinase [Populus trichocarpa]	Q9FPR3	819	0	Serine/threonine-protein kinase EDR1	YAR019c	98.6	5e-20	COG0515	pfam14381	EDR1	Ethylene-responsive protein kinase Le-CTR1. EDR1 regulates disease resistance and ethylene-induced senescence, and is also involved in stress response signalling and cell death regulation.	GO:0009738|abscisic acid-activated signaling pathway;GO:0008219|cell death;GO:0002229|defense response to oomycetes;GO:0009873|ethylene-activated signaling pathway;GO:0000165|MAPK cascade;GO:0009788|negative regulation of abscisic acid-activated signaling pathway;GO:0046777|protein autophosphorylation;GO:1900424|regulation of defense response to bacterium;GO:1900150|regulation of defense response…	GO:0005829|cytosol;GO:0005769|early endosome;GO:0005783|endoplasmic reticulum;GO:0005768|endosome;GO:0005634|nucleus;GO:0005886|plasma membrane;GO:0005802|trans-Golgi network;GO:0012510|trans-Golgi network transport vesicle membrane;	GO:0005524|ATP binding;GO:0016301|kinase activity;GO:0004709|MAP kinase kinase kinase activity;GO:0004712|protein serine/threonine/tyrosine kinase activity;	.	.
PB.4037	PuSMRT_PB.4037.2_transcript18293_f2p0_1322_g1,PuSMRT_PB.4037.1_transcript16057_f2p0_1470_g1	+	1^,2^	Alternative 5' splice site(A5SS)	gi|566255501|ref|XM_006387760.1|	1362	0	Populus trichocarpa hypothetical protein (POPTR_0542s00210g) mRNA, complete cds	Potri.005G060300	gi|566255502|ref|XP_006387822.1|	2369	0	hypothetical protein POPTR_0542s00210g [Populus trichocarpa]	P25141	674	0	Alcohol dehydrogenase 1	YPO1502	372	2e-123	COG1062	pfam08240	ADH_N	Alcohol dehydrogenase GroES-like domain. This is the catalytic domain of alcohol dehydrogenases. Many of them contain an inserted zinc binding domain. This domain has a GroES-like structure.	.	GO:0005737|cytoplasm;	GO:0004022|alcohol dehydrogenase (NAD) activity;GO:0008270|zinc ion binding;	.	.
PB.4080	PuSMRT_PB.4080.1_transcript1218_f3p0_3917_g1,PuSMRT_PB.4080.2_transcript1255_f2p0_3854_g1/PuSMRT_PB.4080.5_transcript2385_f2p0_3456_g1	-	1^,2^	Alternative 5' splice site(A5SS)	gi|743861002|ref|XM_011032714.1|	3649	0	PREDICTED: Populus euphratica calmodulin-binding transcription activator 3-like (LOC105130287), transcript variant X1, mRNA	Potri.005G075100	gi|743861003|ref|XP_011031016.1|	5586	0	PREDICTED: calmodulin-binding transcription activator 3-like isoform X1 [Populus euphratica]	Q8GSA7	976	0	Calmodulin-binding transcription activator 3	.	.	.	.	pfam03859	CG-1	CG-1 domain. CG-1 domains are highly conserved domains of about 130 amino-acid residues containing a predicted bipartite NLS and named after a partial cDNA clone isolated from parsley encoding a sequence-specific DNA-binding protein. CG-1 domains are associated with CAMTA proteins (for CAlModulin -binding Transcription Activator) that are transcription factors containing a calmodulin -binding dom…	GO:0042742|defense response to bacterium;GO:0050832|defense response to fungus;GO:0010150|leaf senescence;GO:0045944|positive regulation of transcription from RNA polymerase II promoter;GO:0006355|regulation of transcription, DNA-templated;GO:0009409|response to cold;	GO:0005634|nucleus;	GO:0043565|sequence-specific DNA binding;GO:0001077|transcriptional activator activity, RNA polymerase II core promoter proximal region sequence-specific binding;	.	.
PB.4092	PuSMRT_PB.4092.11_transcript8174_f2p0_2196_g1,PuSMRT_PB.4092.10_transcript17295_f5p0_1375_g1/PuSMRT_PB.4092.12_transcript11191_f19p0_1851_g1/PuSMRT_PB.4092.13_transcript10452_f2p0_1926_g1/PuSMRT_PB.4092.14_transcript24509_f2p0_995_g1/PuSMRT_PB.4092.1_transcript24411_f3p0_992_g1/PuSMRT_PB.4092.2_transcript9779_f388p0_1978_g1/PuSMRT_PB.4092.3_transcript15648_f3p0_1513_g1/PuSMRT_PB.4092.4_transcript…	-	0,1^2-	Retained intron(RI)	gi|566170118|ref|XM_006382848.1|	2592	0	Populus trichocarpa hypothetical protein (POPTR_0005s08050g) mRNA, complete cds	Potri.005G078700	gi|566170119|ref|XP_006382910.1|	2437	0	hypothetical protein POPTR_0005s08050g [Populus trichocarpa]	Q9SSV4	883	0	Inositol-3-phosphate synthase	YJL153c	495	5e-164	COG1260	pfam07994	NAD_binding_5	Myo-inositol-1-phosphate synthase. This is a family of myo-inositol-1-phosphate synthases. Inositol-1-phosphate catalyses the conversion of glucose-6- phosphate to inositol-1-phosphate, which is then dephosphorylated to inositol. Inositol phosphates play an important role in signal transduction.	GO:0006021|inositol biosynthetic process;GO:0008654|phospholipid biosynthetic process;	GO:0005737|cytoplasm;	GO:0004512|inositol-3-phosphate synthase activity;	.	.
PB.4092	PuSMRT_PB.4092.13_transcript10452_f2p0_1926_g1,PuSMRT_PB.4092.2_transcript9779_f388p0_1978_g1	-	0,1^2-	Retained intron(RI)	gi|566170118|ref|XM_006382848.1|	2592	0	Populus trichocarpa hypothetical protein (POPTR_0005s08050g) mRNA, complete cds	Potri.005G078700	gi|566170119|ref|XP_006382910.1|	2437	0	hypothetical protein POPTR_0005s08050g [Populus trichocarpa]	Q9SSV4	883	0	Inositol-3-phosphate synthase	YJL153c	495	5e-164	COG1260	pfam07994	NAD_binding_5	Myo-inositol-1-phosphate synthase. This is a family of myo-inositol-1-phosphate synthases. Inositol-1-phosphate catalyses the conversion of glucose-6- phosphate to inositol-1-phosphate, which is then dephosphorylated to inositol. Inositol phosphates play an important role in signal transduction.	GO:0006021|inositol biosynthetic process;GO:0008654|phospholipid biosynthetic process;	GO:0005737|cytoplasm;	GO:0004512|inositol-3-phosphate synthase activity;	.	.
PB.4092	PuSMRT_PB.4092.8_transcript8755_f4p0_2116_g1,PuSMRT_PB.4092.12_transcript11191_f19p0_1851_g1	-	0,1^2-	Retained intron(RI)	gi|566170118|ref|XM_006382848.1|	2592	0	Populus trichocarpa hypothetical protein (POPTR_0005s08050g) mRNA, complete cds	Potri.005G078700	gi|566170119|ref|XP_006382910.1|	2437	0	hypothetical protein POPTR_0005s08050g [Populus trichocarpa]	Q9SSV4	883	0	Inositol-3-phosphate synthase	YJL153c	495	5e-164	COG1260	pfam07994	NAD_binding_5	Myo-inositol-1-phosphate synthase. This is a family of myo-inositol-1-phosphate synthases. Inositol-1-phosphate catalyses the conversion of glucose-6- phosphate to inositol-1-phosphate, which is then dephosphorylated to inositol. Inositol phosphates play an important role in signal transduction.	GO:0006021|inositol biosynthetic process;GO:0008654|phospholipid biosynthetic process;	GO:0005737|cytoplasm;	GO:0004512|inositol-3-phosphate synthase activity;	.	.
PB.413	PuSMRT_PB.413.1_transcript1378_f2p0_3793_g1,PuSMRT_PB.413.2_transcript2324_f2p0_3426_g1	-	0,1^2-	Retained intron(RI)	gi|566146392|ref|XM_006368153.1|	3332	0	Populus trichocarpa Potassium transporter 11 family protein (POPTR_0001s00590g) mRNA, complete cds	Potri.001G123800	gi|566146393|ref|XP_006368215.1|	3695	0	Potassium transporter 11 family protein [Populus trichocarpa]	O64769	1149	0	Potassium transporter 11	SMc00873	236	1e-65	COG3158	pfam02705	K_trans	K+ potassium transporter. This is a family of K+ potassium transporters that are conserved across phyla, having both bacterial (KUP), yeast (HAK), and plant (AtKT) sequences as members.	.	GO:0016021|integral component of membrane;GO:0005886|plasma membrane;	GO:0015079|potassium ion transmembrane transporter activity;	K03549	kup; KUP system potassium uptake protein
PB.4147	PuSMRT_PB.4147.2_transcript23657_f2p0_1039_g1,PuSMRT_PB.4147.1_transcript27640_f2p0_836_g1	+	0,1^2-	Retained intron(RI)	gi|566170424|ref|XM_006382901.1|	1160	0	Populus trichocarpa hypothetical protein (POPTR_0005s09750g) mRNA, complete cds	Potri.005G094700	gi|566170425|ref|XP_006382963.1|	853	5e-109	hypothetical protein POPTR_0005s09750g [Populus trichocarpa]	.	.	.	.	.	.	.	.	pfam02620	DUF177	Uncharacterized ACR, COG1399.	.	.	.	.	.
PB.4147	PuSMRT_PB.4147.2_transcript23657_f2p0_1039_g1,PuSMRT_PB.4147.3_transcript26557_f2p0_857_g1	+	0,1^2-	Retained intron(RI)	gi|566170424|ref|XM_006382901.1|	1160	0	Populus trichocarpa hypothetical protein (POPTR_0005s09750g) mRNA, complete cds	Potri.005G094700	gi|566170425|ref|XP_006382963.1|	853	5e-109	hypothetical protein POPTR_0005s09750g [Populus trichocarpa]	.	.	.	.	.	.	.	.	pfam02620	DUF177	Uncharacterized ACR, COG1399.	.	.	.	.	.
PB.4147	PuSMRT_PB.4147.3_transcript26557_f2p0_857_g1,PuSMRT_PB.4147.1_transcript27640_f2p0_836_g1	+	1^,2^	Alternative 5' splice site(A5SS)	gi|566170424|ref|XM_006382901.1|	1160	0	Populus trichocarpa hypothetical protein (POPTR_0005s09750g) mRNA, complete cds	Potri.005G094700	gi|566170425|ref|XP_006382963.1|	853	5e-109	hypothetical protein POPTR_0005s09750g [Populus trichocarpa]	.	.	.	.	.	.	.	.	pfam02620	DUF177	Uncharacterized ACR, COG1399.	.	.	.	.	.
PB.4208	PuSMRT_PB.4208.1_transcript24029_f2p0_1001_g1,PuSMRT_PB.4208.2_transcript26211_f2p0_910_g1	+	1-,2-	Alternative 3' splice site(A3SS)	gi|566170717|ref|XM_006382990.1|	597	0	Populus trichocarpa hypothetical protein (POPTR_0005s11090g) mRNA, complete cds	Potri.005G109100	gi|566170718|ref|XP_006383052.1|	473	2e-88	hypothetical protein POPTR_0005s11090g [Populus trichocarpa]	.	.	.	.	.	.	.	.	pfam06993	DUF1304	Protein of unknown function (DUF1304). This family consists of several hypothetical bacterial proteins of around 120 residues in length. The function of this family is unknown.	.	.	.	.	.
PB.4239	PuSMRT_PB.4239.2_transcript13838_f2p0_1668_g1,PuSMRT_PB.4239.1_transcript30039_f2p0_736_g1	-	1-,2-	Alternative 3' splice site(A3SS)	gi|566170893|ref|XM_006383074.1|	2064	0	Populus trichocarpa hypothetical protein (POPTR_0005s11910g) mRNA, complete cds	Potri.005G117200	gi|566170894|ref|XP_006383136.1|	1868	0	hypothetical protein POPTR_0005s11910g [Populus trichocarpa]	Q9SD33	618	0	UPF0183 protein At3g51130	.	.	.	.	pfam03676	UPF0183	Uncharacterized protein family (UPF0183). This family of proteins includes Lin-10 from C. elegans.	GO:0070370|cellular heat acclimation;GO:0071483|cellular response to blue light;GO:0010100|negative regulation of photomorphogenesis;GO:0006355|regulation of transcription, DNA-templated;GO:0006351|transcription, DNA-templated;	GO:0005634|nucleus;	GO:0003700|transcription factor activity, sequence-specific DNA binding;GO:0000989|transcription factor activity, transcription factor binding;GO:0008270|zinc ion binding;	.	.
PB.4247	PuSMRT_PB.4247.1_transcript5909_f2p0_2572_g1,PuSMRT_PB.4247.2_transcript11097_f2p0_1868_g1	+	0,1^2-	Retained intron(RI)	gi|566170932|ref|XM_006383092.1|	1921	0	Populus trichocarpa glycosyl transferase family 1 family protein (POPTR_0005s12080g) mRNA, complete cds	Potri.005G118800	gi|566170933|ref|XP_006383154.1|	2477	0	glycosyl transferase family 1 family protein [Populus trichocarpa]	.	.	.	.	.	.	.	.	pfam00534	Glycos_transf_1	Glycosyl transferases group 1. Mutations in this domain of human PIGA lead to disease (Paroxysmal Nocturnal haemoglobinuria). Members of this family transfer activated sugars to a variety of substrates, including glycogen, Fructose-6-phosphate and lipopolysaccharides. Members of this family transfer UDP, ADP, GDP or CMP linked sugars. The eukaryotic glycogen synthases may be distant members of th…	.	.	.	.	.
PB.4281	PuSMRT_PB.4281.4_transcript22495_f4p0_1094_g1,PuSMRT_PB.4281.3_transcript15212_f2p0_1539_g1	-	1^,2^	Alternative 5' splice site(A5SS)	gi|566171218|ref|XM_002307198.2|	927	0	Populus trichocarpa O2 evolving complex 33kD family protein (POPTR_0005s13860g) mRNA, complete cds	Potri.005G130400	gi|224084209|ref|XP_002307234.1|	1317	1e-176	O2 evolving complex 33kD family protein [Populus trichocarpa]	Q40459	483	1e-166	Oxygen-evolving enhancer protein 1, chloroplastic	.	.	.	.	pfam01716	MSP	Manganese-stabilizing protein / photosystem II polypeptide. This family consists of the 33 KDa photosystem II polypeptide from the oxygen evolving complex (OEC) of plants and cyanobacteria. The protein is also known as the manganese-stabilizing protein as it is associated with the manganese complex of the OEC and may provide the ligands for the complex.	GO:0015979|photosynthesis;GO:0042549|photosystem II stabilization;	GO:0009535|chloroplast thylakoid membrane;GO:0019898|extrinsic component of membrane;GO:0016021|integral component of membrane;GO:0009654|photosystem II oxygen evolving complex;	GO:0005509|calcium ion binding;	.	.
PB.4326	PuSMRT_PB.4326.1_transcript3591_f2p0_3056_g1,PuSMRT_PB.4326.2_transcript3315_f2p0_3147_g1	+	0,1-2^	Skipped exon(SE)	gi|566172087|ref|XM_002306459.2|	3028	0	Populus trichocarpa hypothetical protein (POPTR_0005s18820g) mRNA, complete cds	Potri.005G144700	gi|566172088|ref|XP_002306495.2|	4181	0	hypothetical protein POPTR_0005s18820g [Populus trichocarpa]	O22193	972	0	U-box domain-containing protein 4	.	.	.	.	pfam04564	U-box	U-box domain. This domain is related to the Ring finger pfam00097 but lacks the zinc binding residues.	.	GO:0005634|nucleus;	GO:0016874|ligase activity;GO:0004842|ubiquitin-protein transferase activity;	.	.
PB.4343	PuSMRT_PB.4343.1_transcript10155_f2p0_1974_g1,PuSMRT_PB.4343.2_transcript11151_f3p0_1862_g1	+	1-,2-	Alternative 3' splice site(A3SS)	gi|743937232|ref|XM_011014718.1|	1922	0	PREDICTED: Populus euphratica uncharacterized LOC105117150 (LOC105117150), transcript variant X1, mRNA	Potri.005G148800	gi|743937233|ref|XP_011013020.1|	2270	0	PREDICTED: uncharacterized protein LOC105117150 isoform X1 [Populus euphratica]	.	.	.	.	.	.	.	.	pfam04616	Glyco_hydro_43	Glycosyl hydrolases family 43. The glycosyl hydrolase family 43 contains members that are arabinanase. Rabinanases hydrolyses the alpha-1,5-linked L-arabinofuranoside backbone of plant cell wall arabinans. The structure of arabinanase Arb43A from Cellvibrio japonicus reveals a five-bladed beta-propeller fold. A long V-shaped groove, partially enclosed at one end, forms a single extended substrate…	.	.	.	.	.
PB.4358	PuSMRT_PB.4358.1_transcript10024_f2p0_2003_g1,PuSMRT_PB.4358.2_transcript16524_f2p0_1462_g1	+	0,1^2-	Retained intron(RI)	gi|566171931|ref|XM_006383457.1|	1535	0	Populus trichocarpa hypothetical protein (POPTR_0005s17870g) mRNA, complete cds	Potri.005G156500	gi|224081945|ref|XP_002306537.1|	1411	0	hypothetical protein POPTR_0005s17870g [Populus trichocarpa]	.	.	.	.	.	.	.	.	pfam00855	PWWP	PWWP domain. The PWWP domain is named after a conserved Pro-Trp-Trp-Pro motif. The domain binds to Histone-4 methylated at lysine-20, H4K20me, suggesting that it is methyl-lysine recognition motif. Removal of two conserved aromatic residues in a hydrophobic cavity created by this domain within the full-length protein, Pdp1, abolishes the interaction o f the protein with H4K20me3. In fission yeast…	.	.	.	.	.
PB.4382	PuSMRT_PB.4382.2_transcript3953_f7p0_2912_g1,PuSMRT_PB.4382.3_transcript4653_f2p0_2830_g1	-	1^,2^	Alternative 5' splice site(A5SS)	gi|566171827|ref|XM_002307339.2|	2713	0	Populus trichocarpa hypothetical protein (POPTR_0005s17170g) mRNA, complete cds	Potri.005G164000	gi|566171828|ref|XP_002307375.2|	2975	0	hypothetical protein POPTR_0005s17170g [Populus trichocarpa]	Q6AXZ2	57.8	3e-07	Leucine-rich repeat-containing protein 46	.	.	.	.	pfam12799	LRR_4	Leucine Rich repeats (2 copies). Leucine rich repeats are short sequence motifs present in a number of proteins with diverse functions and cellular locations. These repeats are usually involved in protein-protein interactions. Each Leucine Rich Repeat is composed of a beta-alpha unit. These units form elongated non-globular structures. Leucine Rich Repeats are often flanked by cysteine rich domai…	GO:0007155|cell adhesion;GO:0010289|homogalacturonan biosynthetic process;GO:0009735|response to cytokinin;GO:0048364|root development;GO:0048367|shoot system development;	GO:0005768|endosome;GO:0005794|Golgi apparatus;GO:0000139|Golgi membrane;GO:0016021|integral component of membrane;GO:0005802|trans-Golgi network;GO:0005774|vacuolar membrane;	GO:0008168|methyltransferase activity;GO:0008757|S-adenosylmethionine-dependent methyltransferase activity;	.	.
PB.4396	PuSMRT_PB.4396.2_transcript1559_f7p0_3684_g1,PuSMRT_PB.4396.1_transcript9265_f2p0_2090_g1	+	0,1^2-	Retained intron(RI)	gi|566171782|ref|XM_002307355.2|	4057	0	Populus trichocarpa hypothetical protein (POPTR_0005s16680g) mRNA, complete cds	Potri.005G168600	gi|566171783|ref|XP_002307391.2|	1684	0	hypothetical protein POPTR_0005s16680g [Populus trichocarpa]	Q9Y7K5	124	3e-28	Uncharacterized WD repeat-containing protein C2A9.03	.	.	.	.	pfam00400	WD40	WD domain, G-beta repeat.	.	GO:0005829|cytosol;GO:0043234|protein complex;	.	.	.
PB.4411	PuSMRT_PB.4411.3_transcript3291_f2p0_3136_g1,PuSMRT_PB.4411.1_transcript3596_f5p0_3057_g1/PuSMRT_PB.4411.7_transcript4026_f11p0_2917_g1	-	0,1^2-	Retained intron(RI)	gi|566171705|ref|XM_002307379.2|	2994	0	Populus trichocarpa nitrate reductase family protein (POPTR_0005s16180g) mRNA, complete cds	Potri.005G172400	gi|224084832|ref|XP_002307415.1|	4689	0	nitrate reductase family protein [Populus trichocarpa]	P17569	1476	0	Nitrate reductase [NADH]	MT1801	218	6e-62	COG2041	pfam03404	Mo-co_dimer	Mo-co oxidoreductase dimerization domain. This domain is found in molybdopterin cofactor (Mo-co) oxidoreductases. It is involved in dimer formation, and has an Ig-fold structure.	GO:0042128|nitrate assimilation;GO:0006809|nitric oxide biosynthetic process;	.	GO:0020037|heme binding;GO:0030151|molybdenum ion binding;GO:0043546|molybdopterin cofactor binding;GO:0009703|nitrate reductase (NADH) activity;GO:0050464|nitrate reductase (NADPH) activity;	.	.
PB.4450	PuSMRT_PB.4450.1_transcript3239_f10p0_3096_g1,PuSMRT_PB.4450.3_transcript3518_f12p0_3052_g1	-	0,1^2-	Retained intron(RI)	gi|566172389|ref|XM_002307428.2|	2134	0	Populus trichocarpa hypothetical protein (POPTR_0005s20670g) mRNA, complete cds	Potri.005G184500	gi|566172390|ref|XP_002307464.2|	2777	0	hypothetical protein POPTR_0005s20670g [Populus trichocarpa]	Q6NPR7	667	0	Probable methyltransferase PMT24	.	.	.	.	pfam03141	Methyltransf_29	Putative S-adenosyl-L-methionine-dependent methyltransferase. This family is a putative S-adenosyl-L-methionine (SAM)-dependent methyltransferase.	GO:0032259|methylation;	GO:0005768|endosome;GO:0005794|Golgi apparatus;GO:0000139|Golgi membrane;GO:0016021|integral component of membrane;GO:0005802|trans-Golgi network;GO:0005774|vacuolar membrane;	GO:0008757|S-adenosylmethionine-dependent methyltransferase activity;	.	.
PB.4468	PuSMRT_PB.4468.2_transcript15112_f2p0_1552_g1,PuSMRT_PB.4468.1_transcript13202_f2p0_1689_g1	+	0,1^2-	Retained intron(RI)	gi|566172503|ref|XM_002306657.2|	1128	0	Populus trichocarpa fructose-1 family protein (POPTR_0005s21360g) mRNA, complete cds	Potri.005G191400	gi|224082438|ref|XP_002306693.1|	1575	0	fructose-1 family protein [Populus trichocarpa]	P46276	562	0	Fructose-1,6-bisphosphatase, cytosolic	YLR377c	303	1e-94	COG0158	pfam00316	FBPase	Fructose-1-6-bisphosphatase.	GO:0006001|fructose catabolic process;	GO:0005737|cytoplasm;	GO:0042132|fructose 1,6-bisphosphate 1-phosphatase activity;GO:0046872|metal ion binding;	K03841	FBP, fbp; fructose-1,6-bisphosphatase I [EC:3.1.3.11]
PB.4483	PuSMRT_PB.4483.1_transcript13192_f18p0_1687_g1/PuSMRT_PB.4483.2_transcript11271_f8p0_1847_g1/PuSMRT_PB.4483.3_transcript15634_f2p0_1544_g1/PuSMRT_PB.4483.4_transcript4153_f2p0_2908_g1/PuSMRT_PB.4483.5_transcript5379_f7p0_2628_g1/PuSMRT_PB.4483.6_transcript6431_f3p0_2467_g1,PuSMRT_PB.4483.7_transcript21539_f2p0_1138_g1	+	1-,2-	Alternative 3' splice site(A3SS)	gi|743901862|ref|XM_011045956.1|	1747	0	PREDICTED: Populus euphratica polypyrimidine tract-binding protein homolog 3 (LOC105139495), transcript variant X5, mRNA	Potri.005G194700	gi|566172562|ref|XP_002306709.2|	2456	0	hypothetical protein POPTR_0005s21660g, partial [Populus trichocarpa]	Q6ICX4	748	0	Polypyrimidine tract-binding protein homolog 3	.	.	.	.	pfam13893	RRM_5	RNA recognition motif. (a.k.a. RRM, RBD, or RNP domain). The RRM motif is probably diagnostic of an RNA binding protein. RRMs are found in a variety of RNA binding proteins, including various hnRNP proteins, proteins implicated in regulation of alternative splicing, and protein components of snRNPs. The motif also appears in a few single stranded DNA binding proteins.	GO:0006397|mRNA processing;GO:0043484|regulation of RNA splicing;GO:0006417|regulation of translation;GO:0008380|RNA splicing;	GO:0005737|cytoplasm;GO:0000932|cytoplasmic mRNA processing body;GO:0005634|nucleus;	GO:0000166|nucleotide binding;GO:0003723|RNA binding;	K14948	PTBP2, NPTB; polypyrimidine tract-binding protein 2
PB.4483	PuSMRT_PB.4483.1_transcript13192_f18p0_1687_g1/PuSMRT_PB.4483.2_transcript11271_f8p0_1847_g1/PuSMRT_PB.4483.4_transcript4153_f2p0_2908_g1/PuSMRT_PB.4483.5_transcript5379_f7p0_2628_g1/PuSMRT_PB.4483.6_transcript6431_f3p0_2467_g1,PuSMRT_PB.4483.3_transcript15634_f2p0_1544_g1	+	1^,2^	Alternative 5' splice site(A5SS)	gi|743901862|ref|XM_011045956.1|	1747	0	PREDICTED: Populus euphratica polypyrimidine tract-binding protein homolog 3 (LOC105139495), transcript variant X5, mRNA	Potri.005G194700	gi|566172562|ref|XP_002306709.2|	2456	0	hypothetical protein POPTR_0005s21660g, partial [Populus trichocarpa]	Q6ICX4	748	0	Polypyrimidine tract-binding protein homolog 3	.	.	.	.	pfam13893	RRM_5	RNA recognition motif. (a.k.a. RRM, RBD, or RNP domain). The RRM motif is probably diagnostic of an RNA binding protein. RRMs are found in a variety of RNA binding proteins, including various hnRNP proteins, proteins implicated in regulation of alternative splicing, and protein components of snRNPs. The motif also appears in a few single stranded DNA binding proteins.	GO:0006397|mRNA processing;GO:0043484|regulation of RNA splicing;GO:0006417|regulation of translation;GO:0008380|RNA splicing;	GO:0005737|cytoplasm;GO:0000932|cytoplasmic mRNA processing body;GO:0005634|nucleus;	GO:0000166|nucleotide binding;GO:0003723|RNA binding;	K14948	PTBP2, NPTB; polypyrimidine tract-binding protein 2
PB.4483	PuSMRT_PB.4483.4_transcript4153_f2p0_2908_g1,PuSMRT_PB.4483.1_transcript13192_f18p0_1687_g1/PuSMRT_PB.4483.2_transcript11271_f8p0_1847_g1/PuSMRT_PB.4483.3_transcript15634_f2p0_1544_g1/PuSMRT_PB.4483.5_transcript5379_f7p0_2628_g1/PuSMRT_PB.4483.6_transcript6431_f3p0_2467_g1	+	0,1^2-	Retained intron(RI)	gi|743901862|ref|XM_011045956.1|	1747	0	PREDICTED: Populus euphratica polypyrimidine tract-binding protein homolog 3 (LOC105139495), transcript variant X5, mRNA	Potri.005G194700	gi|566172562|ref|XP_002306709.2|	2456	0	hypothetical protein POPTR_0005s21660g, partial [Populus trichocarpa]	Q6ICX4	748	0	Polypyrimidine tract-binding protein homolog 3	.	.	.	.	pfam13893	RRM_5	RNA recognition motif. (a.k.a. RRM, RBD, or RNP domain). The RRM motif is probably diagnostic of an RNA binding protein. RRMs are found in a variety of RNA binding proteins, including various hnRNP proteins, proteins implicated in regulation of alternative splicing, and protein components of snRNPs. The motif also appears in a few single stranded DNA binding proteins.	GO:0006397|mRNA processing;GO:0043484|regulation of RNA splicing;GO:0006417|regulation of translation;GO:0008380|RNA splicing;	GO:0005737|cytoplasm;GO:0000932|cytoplasmic mRNA processing body;GO:0005634|nucleus;	GO:0000166|nucleotide binding;GO:0003723|RNA binding;	K14948	PTBP2, NPTB; polypyrimidine tract-binding protein 2
PB.4483	PuSMRT_PB.4483.4_transcript4153_f2p0_2908_g1/PuSMRT_PB.4483.5_transcript5379_f7p0_2628_g1/PuSMRT_PB.4483.6_transcript6431_f3p0_2467_g1,PuSMRT_PB.4483.1_transcript13192_f18p0_1687_g1/PuSMRT_PB.4483.2_transcript11271_f8p0_1847_g1/PuSMRT_PB.4483.3_transcript15634_f2p0_1544_g1/PuSMRT_PB.4483.7_transcript21539_f2p0_1138_g1	+	0,1^2-	Retained intron(RI)	gi|743901862|ref|XM_011045956.1|	1747	0	PREDICTED: Populus euphratica polypyrimidine tract-binding protein homolog 3 (LOC105139495), transcript variant X5, mRNA	Potri.005G194700	gi|566172562|ref|XP_002306709.2|	2456	0	hypothetical protein POPTR_0005s21660g, partial [Populus trichocarpa]	Q6ICX4	748	0	Polypyrimidine tract-binding protein homolog 3	.	.	.	.	pfam13893	RRM_5	RNA recognition motif. (a.k.a. RRM, RBD, or RNP domain). The RRM motif is probably diagnostic of an RNA binding protein. RRMs are found in a variety of RNA binding proteins, including various hnRNP proteins, proteins implicated in regulation of alternative splicing, and protein components of snRNPs. The motif also appears in a few single stranded DNA binding proteins.	GO:0006397|mRNA processing;GO:0043484|regulation of RNA splicing;GO:0006417|regulation of translation;GO:0008380|RNA splicing;	GO:0005737|cytoplasm;GO:0000932|cytoplasmic mRNA processing body;GO:0005634|nucleus;	GO:0000166|nucleotide binding;GO:0003723|RNA binding;	K14948	PTBP2, NPTB; polypyrimidine tract-binding protein 2
PB.451	PuSMRT_PB.451.2_transcript2170_f2p0_3478_g1,PuSMRT_PB.451.1_transcript3991_f3p0_2960_g1/PuSMRT_PB.451.3_transcript4421_f4p0_2838_g1	-	0,1^2-	Retained intron(RI)	gi|743809249|ref|XM_011020161.1|	2960	0	PREDICTED: Populus euphratica extra-large guanine nucleotide-binding protein 3-like (LOC105121502), transcript variant X2, mRNA	Potri.001G135300	gi|566146655|ref|XP_002297687.2|	4489	0	extra-large guanine nucleotide binding family protein [Populus trichocarpa]	Q9C516	1191	0	Extra-large guanine nucleotide-binding protein 3	.	.	.	.	pfam00503	G-alpha	G-protein alpha subunit. G proteins couple receptors of extracellular signals to intracellular signaling pathways. The G protein alpha subunit binds guanyl nucleotide and is a weak GTPase. A set of residues that are unique to G-alpha as compared to its ancestor the Arf-like family form a ring of residues centered on the nucleotide binding site. A Ggamma is found fused to an inactive Galpha in the…	GO:0007186|G-protein coupled receptor signaling pathway;GO:2000280|regulation of root development;GO:0009617|response to bacterium;GO:0009723|response to ethylene;	GO:0005634|nucleus;	GO:0005525|GTP binding;GO:0003924|GTPase activity;GO:0046872|metal ion binding;GO:0004871|signal transducer activity;	.	.
PB.4517	PuSMRT_PB.4517.1_transcript16672_f2p0_1427_g1,PuSMRT_PB.4517.2_transcript17935_f2p0_1370_g1	-	1-,2-	Alternative 3' splice site(A3SS)	gi|566172743|ref|XM_002307524.2|	1388	0	Populus trichocarpa hypothetical protein (POPTR_0005s22640g) mRNA, complete cds	Potri.005G204800	gi|566172744|ref|XP_002307560.2|	1488	0	hypothetical protein POPTR_0005s22640g [Populus trichocarpa]	Q9C8L4	394	2e-133	Persulfide dioxygenase ETHE1 homolog, mitochondrial	slr1259	213	1e-64	COG0491	pfam00753	Lactamase_B	Metallo-beta-lactamase superfamily.	GO:0009793|embryo development ending in seed dormancy;GO:0009960|endosperm development;GO:0009651|response to salt stress;GO:0048316|seed development;	GO:0005739|mitochondrion;	GO:0016788|hydrolase activity, acting on ester bonds;GO:0046872|metal ion binding;GO:0050313|sulfur dioxygenase activity;	K17725	ETHE1; sulfur dioxygenase [EC:1.13.11.18]
PB.4527	PuSMRT_PB.4527.1_transcript786_f3p0_4169_g1,PuSMRT_PB.4527.2_transcript983_f2p0_4019_g1	-	0,1^2-	Retained intron(RI)	gi|743867551|ref|XM_011034461.1|	3912	0	PREDICTED: Populus euphratica ATP-dependent RNA helicase DHX36 (LOC105131467), mRNA	Potri.005G206500	gi|566172770|ref|XP_002307569.2|	6011	0	NUCLEAR DEIH-BOXHELICASE family protein [Populus trichocarpa]	F4INY4	1371	0	DExH-box ATP-dependent RNA helicase DExH6	SPBC15C4.05	211	2e-54	COG1643	pfam04408	HA2	Helicase associated domain (HA2). This presumed domain is about 90 amino acid residues in length. It is found is a diverse set of RNA helicases. Its function is unknown, however it seems likely to be involved in nucleic acid binding.	GO:0006396|RNA processing;	GO:0005737|cytoplasm;GO:0005634|nucleus;	GO:0005524|ATP binding;GO:0004004|ATP-dependent RNA helicase activity;GO:0004386|helicase activity;GO:0044822|poly(A) RNA binding;	K14442	DHX36, RHAU; ATP-dependent RNA helicase DHX36 [EC:3.6.4.13]
PB.4538	PuSMRT_PB.4538.2_transcript3079_f2p0_3218_g1,PuSMRT_PB.4538.1_transcript3475_f4p0_3088_g1	-	0,1^2-	Retained intron(RI)	gi|566172812|ref|XM_002307544.2|	3097	0	Populus trichocarpa hypothetical protein (POPTR_0005s23080g) mRNA, complete cds	Potri.005G209200	gi|566172813|ref|XP_002307580.2|	4442	0	hypothetical protein POPTR_0005s23080g [Populus trichocarpa]	Q1KPV0	994	0	Probable transmembrane GTPase FZO-like, chloroplastic	DR1235	165	7e-42	COG0699	pfam00350	Dynamin_N	Dynamin family.	GO:0009228|thiamine biosynthetic process;GO:0010027|thylakoid membrane organization;GO:0010228|vegetative to reproductive phase transition of meristem;	GO:0009507|chloroplast;GO:0009706|chloroplast inner membrane;GO:0031969|chloroplast membrane;GO:0009535|chloroplast thylakoid membrane;GO:0016021|integral component of membrane;	GO:0005525|GTP binding;GO:0003924|GTPase activity;GO:0004789|thiamine-phosphate diphosphorylase activity;	.	.
PB.4538	PuSMRT_PB.4538.3_transcript3702_f4p0_3023_g1,PuSMRT_PB.4538.1_transcript3475_f4p0_3088_g1	-	1^,2^	Alternative 5' splice site(A5SS)	gi|566172812|ref|XM_002307544.2|	3097	0	Populus trichocarpa hypothetical protein (POPTR_0005s23080g) mRNA, complete cds	Potri.005G209200	gi|566172813|ref|XP_002307580.2|	4442	0	hypothetical protein POPTR_0005s23080g [Populus trichocarpa]	Q1KPV0	994	0	Probable transmembrane GTPase FZO-like, chloroplastic	DR1235	165	7e-42	COG0699	pfam00350	Dynamin_N	Dynamin family.	GO:0009228|thiamine biosynthetic process;GO:0010027|thylakoid membrane organization;GO:0010228|vegetative to reproductive phase transition of meristem;	GO:0009507|chloroplast;GO:0009706|chloroplast inner membrane;GO:0031969|chloroplast membrane;GO:0009535|chloroplast thylakoid membrane;GO:0016021|integral component of membrane;	GO:0005525|GTP binding;GO:0003924|GTPase activity;GO:0004789|thiamine-phosphate diphosphorylase activity;	.	.
PB.4540	PuSMRT_PB.4540.3_transcript21875_f2p0_1163_g1,PuSMRT_PB.4540.1_transcript12109_f2p0_1782_g1/PuSMRT_PB.4540.2_transcript18782_f4p0_1294_g1	+	1^,2^	Alternative 5' splice site(A5SS)	gi|566172824|ref|XM_002306738.2|	918	0	Populus trichocarpa cyclin family protein (POPTR_0005s23140g) mRNA, complete cds	Potri.005G209800	gi|743867373|ref|XP_011032710.1|	701	2e-84	PREDICTED: cyclin-P3-1-like isoform X1 [Populus euphratica]	Q75HV0	154	2e-41	Cyclin-P3-1	.	.	.	.	pfam08613	Cyclin	Cyclin. This family includes many different cyclin proteins. Members include the G1/S-specific cyclin pas1, and the phosphate system cyclin PHO80/PHO85.	GO:0007049|cell cycle;GO:0051301|cell division;GO:0000079|regulation of cyclin-dependent protein serine/threonine kinase activity;	.	.	.	.
PB.4561	PuSMRT_PB.4561.1_transcript152_f2p0_5397_g1,PuSMRT_PB.4561.2_transcript396_f2p0_4715_g1/PuSMRT_PB.4561.3_transcript1610_f2p0_3704_g1	+	0,1^2-	Retained intron(RI)	gi|566172912|ref|XM_006383615.1|	11171	0	Populus trichocarpa hypothetical protein (POPTR_0005s23680g) mRNA, complete cds	Potri.005G215400	gi|566172913|ref|XP_006383677.1|	17649	0	hypothetical protein POPTR_0005s23680g [Populus trichocarpa]	F4HZB2	5152	0	Protein SPIRRIG	.	.	.	.	pfam02138	Beach	Beige/BEACH domain.	GO:0071472|cellular response to salt stress;GO:0033962|cytoplasmic mRNA processing body assembly;GO:0009825|multidimensional cell growth;GO:1904580|regulation of intracellular mRNA localization;GO:0009737|response to abscisic acid;GO:0010090|trichome morphogenesis;GO:0007033|vacuole organization;	GO:0000932|cytoplasmic mRNA processing body;	.	.	.
PB.4578	PuSMRT_PB.4578.1_transcript10107_f3p0_1971_g1,PuSMRT_PB.4578.2_transcript10943_f2p0_1907_g1	+	0,1^2-	Retained intron(RI)	gi|566172983|ref|XM_002306787.2|	1332	0	Populus trichocarpa WRKY transcription factor 21 family protein (POPTR_0005s24100g) mRNA, complete cds	Potri.005G219500	gi|224082746|ref|XP_002306823.1|	1652	0	WRKY transcription factor 21 family protein [Populus trichocarpa]	O04336	352	6e-116	Probable WRKY transcription factor 21	.	.	.	.	pfam03106	WRKY	WRKY DNA -binding domain.	GO:0006351|transcription, DNA-templated;	GO:0005634|nucleus;	GO:0005516|calmodulin binding;GO:0043565|sequence-specific DNA binding;GO:0003700|transcription factor activity, sequence-specific DNA binding;	.	.
PB.459	PuSMRT_PB.459.5_transcript2412_f2p0_3391_g1,PuSMRT_PB.459.1_transcript1369_f2p0_3937_g1/PuSMRT_PB.459.3_transcript5001_f9p0_2657_g1	-	0,1^2-	Retained intron(RI)	.	.	.	.	.	.	.	.	.	.	.	.	.	.	.	.	.	.	.	.	.	.	.	.	.
PB.4598	PuSMRT_PB.4598.2_transcript35311_f2p0_498_g1,PuSMRT_PB.4598.1_transcript33831_f2p0_573_g1	-	0,1-2^	Skipped exon(SE)	gi|109676317|gb|DQ536148.1|	1494	0	Populus trichocarpa clone 15623897 auxin-regulated protein-like protein mRNA, complete cds	Potri.005G225300	gi|109676318|gb|ABG37641.1|	2602	0	auxin-regulated protein-like protein [Populus trichocarpa]	Q7XI08	431	8e-142	Probable E3 ubiquitin-protein ligase XBOS34	all2748	65.9	2e-10	COG0666	pfam12796	Ank_2	Ankyrin repeats (3 copies).	.	GO:0005737|cytoplasm;GO:0005634|nucleus;GO:0000151|ubiquitin ligase complex;	GO:0016874|ligase activity;GO:0031625|ubiquitin protein ligase binding;GO:0004842|ubiquitin-protein transferase activity;GO:0008270|zinc ion binding;	.	.
PB.4609	PuSMRT_PB.4609.1_transcript5312_f2p0_2674_g1,PuSMRT_PB.4609.2_transcript5541_f4p0_2620_g1	+	0,1^2-	Retained intron(RI)	gi|566173109|ref|XM_002306837.2|	2544	0	Populus trichocarpa hypothetical protein (POPTR_0005s24980g) mRNA, complete cds	Potri.005G228200	gi|566173110|ref|XP_002306873.2|	3524	0	hypothetical protein POPTR_0005s24980g [Populus trichocarpa]	Q8LEZ4	316	3e-97	Protein NUCLEAR FUSION DEFECTIVE 5, mitochondrial	.	.	.	.	pfam13041	PPR_2	PPR repeat family. This repeat has no known function. It is about 35 amino acids long and is found in up to 18 copies in some proteins. The family appears to be greatly expanded in plants and fungi. The repeat has been called PPR.	GO:0000741|karyogamy;GO:0010197|polar nucleus fusion;	GO:0005739|mitochondrion;	.	.	.
PB.4648	PuSMRT_PB.4648.2_transcript3665_f4p0_3032_g1,PuSMRT_PB.4648.1_transcript14109_f10p0_1590_g1	+	0,1^2-	Retained intron(RI)	gi|566173250|ref|XM_006383675.1|	1623	0	Populus trichocarpa hypothetical protein (POPTR_0005s25720g) mRNA, complete cds	Potri.005G235900	gi|224082960|ref|XP_002306908.1|	1650	0	hypothetical protein POPTR_0005s25720g [Populus trichocarpa]	Q8L999	428	1e-144	Protein BASIC PENTACYSTEINE6	.	.	.	.	pfam06217	GAGA_bind	GAGA binding protein-like family. This family includes gbp a protein from Soybean that binds to GAGA element dinucleotide repeat DNA. It seems likely that the this domain mediates DNA binding. This putative domain contains several conserved cysteines and a histidine suggesting this may be a zinc-binding DNA interaction domain.	GO:0006355|regulation of transcription, DNA-templated;GO:0009723|response to ethylene;GO:0006351|transcription, DNA-templated;	GO:0005730|nucleolus;GO:0005634|nucleus;	GO:0003677|DNA binding;GO:0042803|protein homodimerization activity;	.	.
PB.4649	PuSMRT_PB.4649.2_transcript2058_f3p0_3520_g1,PuSMRT_PB.4649.4_transcript6534_f3p0_2475_g1	+	0,1^2-	Retained intron(RI)	gi|743903559|ref|XM_011046828.1|	2403	0	PREDICTED: Populus euphratica protein IQ-DOMAIN 32-like (LOC105140128), transcript variant X1, mRNA	Potri.005G236200	gi|224082964|ref|XP_002306910.1|	3695	0	calmodulin-binding family protein [Populus trichocarpa]	Q9FXI5	335	1e-97	Protein IQ-DOMAIN 32	.	.	.	.	pfam13178	DUF4005	Protein of unknown function (DUF4005). This is a C-terminal region of plant IQ-containing putative calmodulin-binding proteins.	GO:0009737|response to abscisic acid;	GO:0009941|chloroplast envelope;GO:0005829|cytosol;GO:0005875|microtubule associated complex;GO:0005634|nucleus;GO:0005886|plasma membrane;	.	.	.
PB.4653	PuSMRT_PB.4653.3_transcript4674_f2p0_2791_g1/PuSMRT_PB.4653.5_transcript969_f2p0_4074_g1,PuSMRT_PB.4653.1_transcript850_f2p0_4174_g1	-	1^,2^	Alternative 5' splice site(A5SS)	gi|743903549|ref|XM_011046822.1|	3669	0	PREDICTED: Populus euphratica auxin response factor 5-like (LOC105140123), mRNA	Potri.005G236700	gi|743903550|ref|XP_011045124.1|	4889	0	PREDICTED: auxin response factor 5-like [Populus euphratica]	P93024	1059	0	Auxin response factor 5	.	.	.	.	pfam06507	Auxin_resp	Auxin response factor. A conserved region of auxin-responsive transcription factors.	GO:0009734|auxin-activated signaling pathway;GO:0009793|embryo development ending in seed dormancy;GO:0009908|flower development;GO:0010305|leaf vascular tissue pattern formation;GO:0009942|longitudinal axis specification;GO:0048507|meristem development;GO:0006355|regulation of transcription, DNA-templated;GO:0009733|response to auxin;GO:0048364|root development;GO:0006351|transcription, DNA-temp…	GO:0016020|membrane;GO:0005634|nucleus;	GO:0042802|identical protein binding;GO:0003700|transcription factor activity, sequence-specific DNA binding;GO:0044212|transcription regulatory region DNA binding;	K14486	K14486, ARF; auxin response factor
PB.4696	PuSMRT_PB.4696.2_transcript2499_f2p0_3388_g1,PuSMRT_PB.4696.3_transcript2285_f2p0_3439_g1/PuSMRT_PB.4696.4_transcript2611_f6p0_3326_g1	-	1-,2-	Alternative 3' splice site(A3SS)	gi|743895984|ref|XM_011042970.1|	3114	0	PREDICTED: Populus euphratica large proline-rich protein BAG6-like (LOC105137274), transcript variant X1, mRNA	Potri.005G247900	gi|743895985|ref|XP_011041272.1|	4045	0	PREDICTED: large proline-rich protein BAG6-like isoform X1 [Populus euphratica]	A7X5R6	84	6e-15	Large proline-rich protein BAG6	SPAC26A3.16	68.9	3e-11	COG5272	pfam00240	ubiquitin	Ubiquitin family. This family contains a number of ubiquitin-like proteins: SUMO (smt3 homologue) Nedd8, Elongin B, Rub1, and Parkin. A number of them are thought to carry a distinctive five-residue motif termed the proteasome-interacting motif (PIM), which may have a biologically significant role in protein delivery to proteasomes and recruitment of proteasomes to transcription sites.	GO:0007420|brain development;GO:0030154|cell differentiation;GO:0016569|covalent chromatin modification;GO:0009790|embryo development;GO:0002376|immune system process;GO:0018393|internal peptidyl-lysine acetylation;GO:0042771|intrinsic apoptotic signaling pathway in response to DNA damage by p53 class mediator;GO:0070059|intrinsic apoptotic signaling pathway in response to endoplasmic reticulum s…	GO:0071818|BAT3 complex;GO:0005829|cytosol;GO:0005634|nucleus;	GO:0031593|polyubiquitin binding;GO:0070628|proteasome binding;GO:0043022|ribosome binding;	.	.
PB.4696	PuSMRT_PB.4696.2_transcript2499_f2p0_3388_g1/PuSMRT_PB.4696.3_transcript2285_f2p0_3439_g1,PuSMRT_PB.4696.4_transcript2611_f6p0_3326_g1	-	1-,2-	Alternative 3' splice site(A3SS)	gi|743895984|ref|XM_011042970.1|	3114	0	PREDICTED: Populus euphratica large proline-rich protein BAG6-like (LOC105137274), transcript variant X1, mRNA	Potri.005G247900	gi|743895985|ref|XP_011041272.1|	4045	0	PREDICTED: large proline-rich protein BAG6-like isoform X1 [Populus euphratica]	A7X5R6	84	6e-15	Large proline-rich protein BAG6	SPAC26A3.16	68.9	3e-11	COG5272	pfam00240	ubiquitin	Ubiquitin family. This family contains a number of ubiquitin-like proteins: SUMO (smt3 homologue) Nedd8, Elongin B, Rub1, and Parkin. A number of them are thought to carry a distinctive five-residue motif termed the proteasome-interacting motif (PIM), which may have a biologically significant role in protein delivery to proteasomes and recruitment of proteasomes to transcription sites.	GO:0007420|brain development;GO:0030154|cell differentiation;GO:0016569|covalent chromatin modification;GO:0009790|embryo development;GO:0002376|immune system process;GO:0018393|internal peptidyl-lysine acetylation;GO:0042771|intrinsic apoptotic signaling pathway in response to DNA damage by p53 class mediator;GO:0070059|intrinsic apoptotic signaling pathway in response to endoplasmic reticulum s…	GO:0071818|BAT3 complex;GO:0005829|cytosol;GO:0005634|nucleus;	GO:0031593|polyubiquitin binding;GO:0070628|proteasome binding;GO:0043022|ribosome binding;	.	.
PB.4709	PuSMRT_PB.4709.1_transcript4354_f2p0_2867_g1/PuSMRT_PB.4709.3_transcript16188_f2p0_1467_g1/PuSMRT_PB.4709.4_transcript3623_f16p0_2980_g1/PuSMRT_PB.4709.5_transcript5273_f2p0_2681_g1/PuSMRT_PB.4709.6_transcript7313_f2p0_2345_g1,PuSMRT_PB.4709.7_transcript5032_f2p0_2721_g1	-	1-,2-	Alternative 3' splice site(A3SS)	gi|566173498|ref|XM_002307753.2|	2411	0	Populus trichocarpa hypothetical protein (POPTR_0005s27240g) mRNA, complete cds	Potri.005G251000	gi|566173499|ref|XP_002307789.2|	4208	0	hypothetical protein POPTR_0005s27240g [Populus trichocarpa]	Q41059	1178	0	1,4-alpha-glucan-branching enzyme 1, chloroplastic/amyloplastic (Fragment)	YEL011w	636	0	COG0296	pfam02922	CBM_48	Carbohydrate-binding module 48 (Isoamylase N-terminal domain). This domain is found in a range of enzymes that act on branched substrates - isoamylase, pullulanase and branching enzyme. This family also contains the beta subunit of 5' AMP activated kinase.	GO:0005978|glycogen biosynthetic process;GO:0019252|starch biosynthetic process;	GO:0009501|amyloplast;GO:0009507|chloroplast;	GO:0003844|1,4-alpha-glucan branching enzyme activity;GO:0043169|cation binding;GO:0004553|hydrolase activity, hydrolyzing O-glycosyl compounds;	.	.
PB.4709	PuSMRT_PB.4709.5_transcript5273_f2p0_2681_g1,PuSMRT_PB.4709.1_transcript4354_f2p0_2867_g1/PuSMRT_PB.4709.4_transcript3623_f16p0_2980_g1/PuSMRT_PB.4709.7_transcript5032_f2p0_2721_g1	-	0,1-2^	Skipped exon(SE)	gi|566173498|ref|XM_002307753.2|	2411	0	Populus trichocarpa hypothetical protein (POPTR_0005s27240g) mRNA, complete cds	Potri.005G251000	gi|566173499|ref|XP_002307789.2|	4208	0	hypothetical protein POPTR_0005s27240g [Populus trichocarpa]	Q41059	1178	0	1,4-alpha-glucan-branching enzyme 1, chloroplastic/amyloplastic (Fragment)	YEL011w	636	0	COG0296	pfam02922	CBM_48	Carbohydrate-binding module 48 (Isoamylase N-terminal domain). This domain is found in a range of enzymes that act on branched substrates - isoamylase, pullulanase and branching enzyme. This family also contains the beta subunit of 5' AMP activated kinase.	GO:0005978|glycogen biosynthetic process;GO:0019252|starch biosynthetic process;	GO:0009501|amyloplast;GO:0009507|chloroplast;	GO:0003844|1,4-alpha-glucan branching enzyme activity;GO:0043169|cation binding;GO:0004553|hydrolase activity, hydrolyzing O-glycosyl compounds;	.	.
PB.4721	PuSMRT_PB.4721.2_transcript2071_f2p0_3528_g1,PuSMRT_PB.4721.1_transcript1634_f2p0_3647_g1	+	0,1^2-	Retained intron(RI)	gi|566173557|ref|XM_002306952.2|	3537	0	Populus trichocarpa Glutamate receptor 3.3 precursor family protein (POPTR_0005s27520g) mRNA, complete cds	Potri.005G253800	gi|566173562|ref|XP_006383781.1|	3466	0	hypothetical protein POPTR_0005s27520g [Populus trichocarpa]	Q9C8E7	840	0	Glutamate receptor 3.3	.	.	.	.	pfam01094	ANF_receptor	Receptor family ligand binding region. This family includes extracellular ligand binding domains of a wide range of receptors. This family also includes the bacterial amino acid binding proteins of known structure.	GO:0006816|calcium ion transport;GO:0019722|calcium-mediated signaling;GO:0071230|cellular response to amino acid stimulus;GO:0050832|defense response to fungus;GO:0009630|gravitropism;GO:0009864|induced systemic resistance, jasmonic acid mediated signaling pathway;GO:0045087|innate immune response;GO:0009611|response to wounding;	GO:0016021|integral component of membrane;GO:0005622|intracellular;GO:0005886|plasma membrane;	GO:0005262|calcium channel activity;GO:0008066|glutamate receptor activity;GO:0004970|ionotropic glutamate receptor activity;	K05387	GRIP; glutamate receptor, ionotropic, plant
PB.4781	PuSMRT_PB.4781.1_transcript10611_f2p0_1911_g1,PuSMRT_PB.4781.2_transcript13927_f2p0_1646_g1/PuSMRT_PB.4781.3_transcript35295_f3p0_499_g1	+	0,1^2-	Retained intron(RI)	gi|566173864|ref|XM_002308746.2|	1491	0	Populus trichocarpa hypothetical protein (POPTR_0006s01230g) mRNA, complete cds	Potri.006G010700	gi|566173867|ref|XP_002307875.2|	1630	0	SWIB complex BAF60b domain-containing family protein [Populus trichocarpa]	O74503	80.9	1e-15	Upstream activation factor subunit spp27	CT460	80.5	4e-17	COG5531	pfam02201	SWIB	SWIB/MDM2 domain. This family includes the SWIB domain and the MDM2 domain. The p53-associated protein (MDM2) is an inhibitor of the p53 tumor suppressor gene binding the transactivation domain and down regulating the ability of p53 to activate transcription. This family contains the p53 binding domain of MDM2.	GO:0045943|positive regulation of transcription from RNA polymerase I promoter;GO:0006351|transcription, DNA-templated;	GO:0005829|cytosol;GO:0005634|nucleus;GO:0000500|RNA polymerase I upstream activating factor complex;	GO:0003677|DNA binding;	K15223	UAF30, SPP27; upstream activation factor subunit UAF30
PB.4785	PuSMRT_PB.4785.1_transcript9170_f2p0_2083_g1/PuSMRT_PB.4785.2_transcript2476_f13p0_3320_g1,PuSMRT_PB.4785.3_transcript3121_f2p0_3176_g1	-	1-,2-	Alternative 3' splice site(A3SS)	.	.	.	.	.	.	.	.	.	.	.	.	.	.	.	.	.	.	.	.	.	.	.	.	.
PB.4797	PuSMRT_PB.4797.2_transcript810_f4p0_4135_g1,PuSMRT_PB.4797.3_transcript8271_f8p0_2177_g1	-	0,1^2-	Retained intron(RI)	gi|743920902|ref|XM_011006204.1|	1986	0	PREDICTED: Populus euphratica scarecrow-like protein 13 (LOC105110983), transcript variant X1, mRNA	Potri.006G016200	gi|224089713|ref|XP_002308802.1|	2950	0	hypothetical protein POPTR_0006s01720g [Populus trichocarpa]	Q9M0M5	648	0	Scarecrow-like protein 13	.	.	.	.	pfam03514	GRAS	GRAS domain family. Proteins in the GRAS (GAI, RGA, SCR) family are known as major players in gibberellin (GA) signaling, which regulates various aspects of plant growth and development. Mutation of the SCARECROW (SCR) gene results in a radial pattern defect, loss of a ground tissue layer, in the root. The PAT1 protein is involved in phytochrome A signal transduction. A sequence, structure and ev…	GO:0006351|transcription, DNA-templated;	GO:0005737|cytoplasm;GO:0005634|nucleus;	GO:0043565|sequence-specific DNA binding;GO:0003700|transcription factor activity, sequence-specific DNA binding;	.	.
PB.4827	PuSMRT_PB.4827.2_transcript20307_f2p0_1214_g1,PuSMRT_PB.4827.1_transcript18385_f2p0_1319_g1	-	1-,2-	Alternative 3' splice site(A3SS)	gi|566174152|ref|XM_002308809.2|	1345	0	Populus trichocarpa ubiquitin-conjugating enzyme family protein (POPTR_0006s02770g) mRNA, complete cds	Potri.006G026900	gi|566174153|ref|XP_002308845.2|	1427	0	ubiquitin-conjugating enzyme family protein [Populus trichocarpa]	Q9FF66	377	8e-127	Ubiquitin-conjugating enzyme E2 22	YDR092w	114	9e-29	COG5078	pfam00179	UQ_con	Ubiquitin-conjugating enzyme. Proteins destined for proteasome-mediated degradation may be ubiquitinated. Ubiquitination follows conjugation of ubiquitin to a conserved cysteine residue of UBC homologues. TSG101 is one of several UBC homologues that lacks this active site cysteine.	GO:0000209|protein polyubiquitination;GO:0006511|ubiquitin-dependent protein catabolic process;	GO:0005737|cytoplasm;GO:0005634|nucleus;	GO:0005524|ATP binding;GO:0061630|ubiquitin protein ligase activity;GO:0031625|ubiquitin protein ligase binding;GO:0004842|ubiquitin-protein transferase activity;	K10583	UBE2S, E2EPF; ubiquitin-conjugating enzyme E2 S [EC:2.3.2.23]
PB.4832	PuSMRT_PB.4832.1_transcript7511_f6p0_2293_g1,PuSMRT_PB.4832.3_transcript15408_f2p0_1552_g1	+	1^,2^	Alternative 5' splice site(A5SS)	gi|566174164|ref|XM_002307904.2|	2189	0	Populus trichocarpa glycosyl hydrolase family protein (POPTR_0006s02850g) mRNA, complete cds	Potri.006G027700	gi|224086707|ref|XP_002307940.1|	3588	0	glycosyl hydrolase family protein [Populus trichocarpa]	Q9SG80	999	0	Alpha-L-arabinofuranosidase 1	CAC3436	283	6e-82	COG3534	pfam06964	Alpha-L-AF_C	Alpha-L-arabinofuranosidase C-terminus. This family represents the C-terminus (approximately 200 residues) of bacterial and eukaryotic alpha-L-arabinofuranosidase (EC:3.2.1.55). This catalyses the hydrolysis of nonreducing terminal alpha-L-arabinofuranosidic linkages in L-arabinose-containing polysaccharides.	GO:0046373|L-arabinose metabolic process;GO:0045493|xylan catabolic process;	GO:0048046|apoplast;GO:0009505|plant-type cell wall;GO:0005578|proteinaceous extracellular matrix;GO:0005773|vacuole;	GO:0046556|alpha-L-arabinofuranosidase activity;GO:0009044|xylan 1,4-beta-xylosidase activity;	K01209	E3.2.1.55, abfA; alpha-N-arabinofuranosidase [EC:3.2.1.55]
PB.4863	PuSMRT_PB.4863.1_transcript10977_f2p0_1896_g1,PuSMRT_PB.4863.2_transcript5816_f2p0_2569_g1/PuSMRT_PB.4863.3_transcript6504_f5p0_2463_g1	+	1^,2^	Alternative 5' splice site(A5SS)	gi|566174317|ref|XM_002307936.2|	2400	0	Populus trichocarpa hypothetical protein (POPTR_0006s03720g) mRNA, complete cds	Potri.006G039000	gi|566174318|ref|XP_002307972.2|	2094	0	hypothetical protein POPTR_0006s03720g [Populus trichocarpa]	O24160	545	0	TGACG-sequence-specific DNA-binding protein TGA-2.1	.	.	.	.	pfam14144	DOG1	Seed dormancy control. This family of plant proteins appears to be a highly specific controller seed dormancy.	GO:0006351|transcription, DNA-templated;	GO:0005634|nucleus;	GO:0043565|sequence-specific DNA binding;GO:0003700|transcription factor activity, sequence-specific DNA binding;	.	.
PB.4869	PuSMRT_PB.4869.2_transcript6859_f2p0_2400_g1,PuSMRT_PB.4869.1_transcript16249_f2p0_1457_g1	+	0,1^2-	Retained intron(RI)	gi|743844635|ref|XM_011028954.1|	1338	0	PREDICTED: Populus euphratica ubiquitin-associated domain-containing protein 2-like (LOC105127596), mRNA	Potri.006G040100	gi|743844636|ref|XP_011027256.1|	1502	0	PREDICTED: ubiquitin-associated domain-containing protein 2-like [Populus euphratica]	Q9LET3	432	5e-147	Rhomboid-like protein 20	.	.	.	.	pfam00627	UBA	UBA/TS-N domain. This small domain is composed of three alpha helices. This family includes the previously defined UBA and TS-N domains. The UBA-domain (ubiquitin associated domain) is a novel sequence motif found in several proteins having connections to ubiquitin and the ubiquitination pathway. The structure of the UBA domain consists of a compact three helix bundle. This domain is found at the…	.	GO:0016021|integral component of membrane;	GO:0004252|serine-type endopeptidase activity;GO:0043130|ubiquitin binding;	.	.
PB.4908	PuSMRT_PB.4908.1_transcript14873_f2p0_1576_g1,PuSMRT_PB.4908.2_transcript20958_f4p0_1166_g1	-	0,1^2-	Retained intron(RI)	gi|566174539|ref|XM_002308912.2|	1047	0	Populus trichocarpa hypothetical protein (POPTR_0006s05000g) mRNA, complete cds	Potri.006G051500	gi|743909147|ref|XP_011048046.1|	1139	4e-153	PREDICTED: protein N-terminal glutamine amidohydrolase [Populus euphratica]	O22944	281	1e-91	Protein N-terminal glutamine amidohydrolase	.	.	.	.	pfam09764	Nt_Gln_amidase	N-terminal glutamine amidase. This protein is conserved from plants to humans. It represents a family of N terminal glutamine amidases. The enzyme removes the NH2 group from a Gln, at the N-terminal, rendering it a Glu.	.	.	GO:0016811|hydrolase activity, acting on carbon-nitrogen (but not peptide) bonds, in linear amides;	.	.
PB.4908	PuSMRT_PB.4908.2_transcript20958_f4p0_1166_g1,PuSMRT_PB.4908.3_transcript25520_f4p0_937_g1/PuSMRT_PB.4908.4_transcript27502_f4p0_822_g1	-	0,1^2-	Retained intron(RI)	gi|566174539|ref|XM_002308912.2|	1047	0	Populus trichocarpa hypothetical protein (POPTR_0006s05000g) mRNA, complete cds	Potri.006G051500	gi|743909147|ref|XP_011048046.1|	1139	4e-153	PREDICTED: protein N-terminal glutamine amidohydrolase [Populus euphratica]	O22944	281	1e-91	Protein N-terminal glutamine amidohydrolase	.	.	.	.	pfam09764	Nt_Gln_amidase	N-terminal glutamine amidase. This protein is conserved from plants to humans. It represents a family of N terminal glutamine amidases. The enzyme removes the NH2 group from a Gln, at the N-terminal, rendering it a Glu.	.	.	GO:0016811|hydrolase activity, acting on carbon-nitrogen (but not peptide) bonds, in linear amides;	.	.
PB.4913	PuSMRT_PB.4913.11_transcript3171_f18p0_3158_g1/PuSMRT_PB.4913.6_transcript2418_f16p0_3352_g1,PuSMRT_PB.4913.2_transcript5896_f3p0_2552_g1/PuSMRT_PB.4913.7_transcript3885_f8p0_2972_g1/PuSMRT_PB.4913.8_transcript4422_f221p0_2777_g1	-	0,1^2-	Retained intron(RI)	gi|566174565|ref|XM_006380953.1|	2245	0	Populus trichocarpa hypothetical protein (POPTR_0006s05130g) mRNA, complete cds	Potri.006G052800	gi|566174566|ref|XP_006381015.1|	3397	0	hypothetical protein POPTR_0006s05130g [Populus trichocarpa]	Q94A08	1110	0	Probable galactinol--sucrose galactosyltransferase 2	.	.	.	.	pfam05691	Raffinose_syn	Raffinose synthase or seed imbibition protein Sip1. This family consists of several raffinose synthase proteins, also known as seed imbibition (Sip1) proteins. Raffinose (O-alpha- D-galactopyranosyl- (1-->6)- O-alpha- D-glucopyranosyl-(1<-->2)- O-beta- D-fructofuranoside) is a widespread oligosaccharide in plant seeds and other tissues. Raffinose synthase (EC:2.4.1.82) is the key enzyme that chan…	GO:0034484|raffinose catabolic process;GO:0080167|response to karrikin;GO:0006979|response to oxidative stress;	GO:0009506|plasmodesma;	GO:0052692|raffinose alpha-galactosidase activity;GO:0016757|transferase activity, transferring glycosyl groups;	K06617	E2.4.1.82; raffinose synthase [EC:2.4.1.82]
PB.4913	PuSMRT_PB.4913.6_transcript2418_f16p0_3352_g1/PuSMRT_PB.4913.7_transcript3885_f8p0_2972_g1,PuSMRT_PB.4913.10_transcript9892_f4p0_1932_g1/PuSMRT_PB.4913.11_transcript3171_f18p0_3158_g1/PuSMRT_PB.4913.2_transcript5896_f3p0_2552_g1/PuSMRT_PB.4913.8_transcript4422_f221p0_2777_g1/PuSMRT_PB.4913.9_transcript6561_f9p0_2358_g1	-	0,1^2-	Retained intron(RI)	gi|566174565|ref|XM_006380953.1|	2245	0	Populus trichocarpa hypothetical protein (POPTR_0006s05130g) mRNA, complete cds	Potri.006G052800	gi|566174566|ref|XP_006381015.1|	3397	0	hypothetical protein POPTR_0006s05130g [Populus trichocarpa]	Q94A08	1110	0	Probable galactinol--sucrose galactosyltransferase 2	.	.	.	.	pfam05691	Raffinose_syn	Raffinose synthase or seed imbibition protein Sip1. This family consists of several raffinose synthase proteins, also known as seed imbibition (Sip1) proteins. Raffinose (O-alpha- D-galactopyranosyl- (1-->6)- O-alpha- D-glucopyranosyl-(1<-->2)- O-beta- D-fructofuranoside) is a widespread oligosaccharide in plant seeds and other tissues. Raffinose synthase (EC:2.4.1.82) is the key enzyme that chan…	GO:0034484|raffinose catabolic process;GO:0080167|response to karrikin;GO:0006979|response to oxidative stress;	GO:0009506|plasmodesma;	GO:0052692|raffinose alpha-galactosidase activity;GO:0016757|transferase activity, transferring glycosyl groups;	K06617	E2.4.1.82; raffinose synthase [EC:2.4.1.82]
PB.4931	PuSMRT_PB.4931.1_transcript3209_f2p0_3164_g1/PuSMRT_PB.4931.5_transcript3618_f3p0_3048_g1,PuSMRT_PB.4931.2_transcript3043_f2p0_3195_g1	-	0,1-2^	Skipped exon(SE)	gi|566174686|ref|XM_006380991.1|	3165	0	Populus trichocarpa C2 domain-containing family protein (POPTR_0006s05780g) mRNA, complete cds	Potri.006G058900	gi|566174687|ref|XP_006381053.1|	3919	0	C2 domain-containing family protein [Populus trichocarpa]	Q9FL59	1089	0	FT-interacting protein 1	.	.	.	.	pfam08372	PRT_C	Plant phosphoribosyltransferase C-terminal. This domain is found at the C-terminus of phosphoribosyltransferases and phosphoribosyltransferase-like proteins. It contains putative transmembrane regions. It often appears together with calcium-ion dependent C2 domains (pfam00168).	GO:0009908|flower development;GO:0009911|positive regulation of flower development;GO:0010228|vegetative to reproductive phase transition of meristem;	GO:0005783|endoplasmic reticulum;GO:0005789|endoplasmic reticulum membrane;GO:0016021|integral component of membrane;GO:0005886|plasma membrane;GO:0009511|plasmodesmatal endoplasmic reticulum;	GO:0005509|calcium ion binding;GO:0005544|calcium-dependent phospholipid binding;GO:0008565|protein transporter activity;GO:0016757|transferase activity, transferring glycosyl groups;	.	.
PB.4937	PuSMRT_PB.4937.1_transcript4548_f6p0_2817_g1,PuSMRT_PB.4937.3_transcript6818_f2p0_2470_g1	-	1^,2^	Alternative 5' splice site(A5SS)	gi|566174702|ref|XM_006380999.1|	1871	0	Populus trichocarpa ubiquitin family protein (POPTR_0006s05870g) mRNA, complete cds	Potri.006G059700	gi|566174703|ref|XP_006381061.1|	2883	0	ubiquitin family protein [Populus trichocarpa]	Q10169	74.7	8e-13	Deubiquitination-protection protein dph1	SPAC26A3.16	74.7	2e-13	COG5272	pfam00240	ubiquitin	Ubiquitin family. This family contains a number of ubiquitin-like proteins: SUMO (smt3 homologue) Nedd8, Elongin B, Rub1, and Parkin. A number of them are thought to carry a distinctive five-residue motif termed the proteasome-interacting motif (PIM), which may have a biologically significant role in protein delivery to proteasomes and recruitment of proteasomes to transcription sites.	GO:0042177|negative regulation of protein catabolic process;	GO:0005829|cytosol;GO:0005634|nucleus;	GO:0031593|polyubiquitin binding;	K04523	UBQLN, DSK2; ubiquilin
PB.494	PuSMRT_PB.494.3_transcript6742_f2p0_2422_g1,PuSMRT_PB.494.1_transcript7075_f2p0_2361_g1/PuSMRT_PB.494.4_transcript6946_f2p0_2381_g1/PuSMRT_PB.494.5_transcript6780_f10p0_2413_g1	-	0,1^2-	Retained intron(RI)	gi|566146886|ref|XM_006368385.1|	3106	0	Populus trichocarpa hypothetical protein (POPTR_0001s02910g) mRNA, complete cds	Potri.001G146200	gi|566146885|ref|XP_006368446.1|	2437	0	hypothetical protein POPTR_0001s02910g [Populus trichocarpa]	Q6LA43	390	5e-121	Two-component response regulator-like APRR2	.	.	.	.	pfam00072	Response_reg	Response regulator receiver domain. This domain receives the signal from the sensor partner in bacterial two-component systems. It is usually found N-terminal to a DNA binding effector domain.	GO:0000160|phosphorelay signal transduction system;GO:0006351|transcription, DNA-templated;	GO:0005634|nucleus;	GO:0003677|DNA binding;GO:0003700|transcription factor activity, sequence-specific DNA binding;	.	.
PB.4965	PuSMRT_PB.4965.2_transcript876_f5p0_4085_g1,PuSMRT_PB.4965.3_transcript1412_f3p0_3778_g1	+	1-,2-	Alternative 3' splice site(A3SS)	gi|566174860|ref|XM_002308032.2|	4141	0	Populus trichocarpa WD-40 repeat family protein (POPTR_0006s06570g) mRNA, complete cds	Potri.006G066800	gi|224087108|ref|XP_002308068.1|	5866	0	WD-40 repeat family protein [Populus trichocarpa]	Q27GK7	1691	0	Topless-related protein 4	.	.	.	.	pfam00400	WD40	WD domain, G-beta repeat.	GO:0010072|primary shoot apical meristem specification;GO:0006355|regulation of transcription, DNA-templated;GO:0006351|transcription, DNA-templated;	GO:0005634|nucleus;	.	.	.
PB.4965	PuSMRT_PB.4965.4_transcript4734_f2p0_2788_g1,PuSMRT_PB.4965.2_transcript876_f5p0_4085_g1	+	1-,2-	Alternative 3' splice site(A3SS)	gi|566174860|ref|XM_002308032.2|	4141	0	Populus trichocarpa WD-40 repeat family protein (POPTR_0006s06570g) mRNA, complete cds	Potri.006G066800	gi|224087108|ref|XP_002308068.1|	5866	0	WD-40 repeat family protein [Populus trichocarpa]	Q27GK7	1691	0	Topless-related protein 4	.	.	.	.	pfam00400	WD40	WD domain, G-beta repeat.	GO:0010072|primary shoot apical meristem specification;GO:0006355|regulation of transcription, DNA-templated;GO:0006351|transcription, DNA-templated;	GO:0005634|nucleus;	.	.	.
PB.4989	PuSMRT_PB.4989.1_transcript1861_f2p0_3611_g1/PuSMRT_PB.4989.2_transcript1289_f12p0_3734_g1/PuSMRT_PB.4989.3_transcript2602_f3p0_3339_g1/PuSMRT_PB.4989.4_transcript861_f2p0_4159_g1/PuSMRT_PB.4989.6_transcript18849_f4p0_1261_g1/PuSMRT_PB.4989.8_transcript14506_f2p0_1589_g1,PuSMRT_PB.4989.5_transcript9962_f2p0_1979_g1	-	1-,2-	Alternative 3' splice site(A3SS)	gi|566174975|ref|XM_002308965.2|	3485	0	Populus trichocarpa hypothetical protein (POPTR_0006s07240g) mRNA, complete cds	Potri.006G072900	gi|566174976|ref|XP_002309001.2|	5252	0	hypothetical protein POPTR_0006s07240g [Populus trichocarpa]	Q9SZR1	1529	0	Calcium-transporting ATPase 10, plasma membrane-type	.	.	.	.	pfam00689	Cation_ATPase_C	Cation transporting ATPase, C-terminus. Members of this families are involved in Na+/K+, H+/K+, Ca++ and Mg++ transport. This family represents 5 transmembrane helices.	.	GO:0005887|integral component of plasma membrane;GO:0043231|intracellular membrane-bounded organelle;GO:0005886|plasma membrane;GO:0009506|plasmodesma;	GO:0005524|ATP binding;GO:0005388|calcium-transporting ATPase activity;GO:0046872|metal ion binding;	K01537	E3.6.3.8; Ca2+-transporting ATPase [EC:3.6.3.8]
PB.4997	PuSMRT_PB.4997.2_transcript30378_f2p0_713_g1,PuSMRT_PB.4997.1_transcript26781_f2p0_890_g1	-	1-,2-	Alternative 3' splice site(A3SS)	gi|743815855|ref|XM_011021741.1|	433	0	PREDICTED: Populus euphratica macrophage migration inhibitory factor homolog (LOC105122555), transcript variant X2, mRNA	Potri.006G075100	gi|566175025|ref|XP_002309009.2|	649	6e-83	hypothetical protein POPTR_0006s07470g [Populus trichocarpa]	P81748	84	4e-19	Macrophage migration inhibitory factor homolog	.	.	.	.	pfam01187	MIF	Macrophage migration inhibitory factor (MIF).	.	GO:0005615|extracellular space;	GO:0004167|dopachrome isomerase activity;GO:0050178|phenylpyruvate tautomerase activity;	.	.
PB.501	PuSMRT_PB.501.1_transcript410_f2p0_4672_g1,PuSMRT_PB.501.2_transcript1323_f2p0_3818_g1	+	0,1^2-	Retained intron(RI)	gi|743810084|ref|XM_011020356.1|	4417	0	PREDICTED: Populus euphratica regulator of nonsense transcripts 1 homolog (LOC105121627), mRNA	Potri.001G148100	gi|743810085|ref|XP_011018658.1|	6249	0	PREDICTED: regulator of nonsense transcripts 1 homolog [Populus euphratica]	Q9FJR0	2008	0	Regulator of nonsense transcripts 1 homolog	SPAC16C9.06c	1012	0	COG1112	pfam09416	UPF1_Zn_bind	RNA helicase (UPF2 interacting domain). UPF1 is an essential RNA helicase that detects mRNAs containing premature stop codons and triggers their degradation. This domain contains 3 zinc binding motifs and forms interactions with another protein (UPF2) that is also involved nonsense-mediated mRNA decay (NMD).	GO:0042742|defense response to bacterium;GO:0009867|jasmonic acid mediated signaling pathway;GO:0048571|long-day photoperiodism;GO:0000184|nuclear-transcribed mRNA catabolic process, nonsense-mediated decay;GO:0009611|response to wounding;GO:0009863|salicylic acid mediated signaling pathway;GO:0010182|sugar mediated signaling pathway;	GO:0005737|cytoplasm;GO:0000932|cytoplasmic mRNA processing body;GO:0005829|cytosol;GO:0005886|plasma membrane;GO:0009506|plasmodesma;	GO:0005524|ATP binding;GO:0003677|DNA binding;GO:0004386|helicase activity;GO:0003723|RNA binding;GO:0008270|zinc ion binding;	K14326	UPF1, RENT1; regulator of nonsense transcripts 1 [EC:3.6.4.-]
PB.5027	PuSMRT_PB.5027.5_transcript378_f2p0_4766_g1,PuSMRT_PB.5027.2_transcript394_f7p0_4692_g1/PuSMRT_PB.5027.6_transcript415_f34p0_4598_g1/PuSMRT_PB.5027.8_transcript525_f5p0_4457_g1/PuSMRT_PB.5027.9_transcript6211_f2p0_2502_g1	-	0,1^2-	Retained intron(RI)	gi|566175156|ref|XM_002309004.2|	4980	0	Populus trichocarpa WD-40 repeat family protein (POPTR_0006s08180g) mRNA, complete cds	Potri.006G081800	gi|224090627|ref|XP_002309040.1|	6924	0	WD-40 repeat family protein [Populus trichocarpa]	.	.	.	.	.	.	.	.	pfam06224	HTH_42	Winged helix DNA-binding domain. This family contains two copies of a winged helix domain.	.	.	.	.	.
PB.5060	PuSMRT_PB.5060.1_transcript3784_f2p0_3103_g1/PuSMRT_PB.5060.2_transcript3869_f4p0_2972_g1,PuSMRT_PB.5060.4_transcript4286_f3p0_2883_g1	-	0,1^2-	Retained intron(RI)	.	.	.	.	.	.	.	.	.	.	.	.	.	.	.	.	.	.	.	.	.	.	.	.	.
PB.5095	PuSMRT_PB.5095.2_transcript13298_f2p0_1688_g1,PuSMRT_PB.5095.3_transcript22349_f6p0_1093_g1	-	0,1^2-	Retained intron(RI)	gi|743811881|ref|XR_841625.1|	819	0	PREDICTED: Populus euphratica E3 ubiquitin-protein ligase RNF8 (LOC105121946), transcript variant X5, misc_RNA	Potri.006G099600	gi|566175487|ref|XP_002309135.2|	805	2e-99	hypothetical protein POPTR_0006s10050g [Populus trichocarpa]	.	.	.	.	.	.	.	.	pfam13923	zf-C3HC4_2	Zinc finger, C3HC4 type (RING finger).	.	.	.	.	.
PB.5139	PuSMRT_PB.5139.4_transcript30447_f3p0_762_g1,PuSMRT_PB.5139.1_transcript21397_f39p0_1079_g1/PuSMRT_PB.5139.2_transcript25119_f4p0_957_g1/PuSMRT_PB.5139.3_transcript27196_f3p0_875_g1	+	1^,2^	Alternative 5' splice site(A5SS)	gi|566175649|ref|XM_002308227.2|	1306	0	Populus trichocarpa Proteasome subunit alpha type 6-1 family protein (POPTR_0006s11140g) mRNA, complete cds	Potri.006G110800	gi|224087915|ref|XP_002308263.1|	1318	2e-179	Proteasome subunit alpha type 6-1 family protein [Populus trichocarpa]	Q9XG77	470	2e-164	Proteasome subunit alpha type-6	.	.	.	.	pfam00227	Proteasome	Proteasome subunit. The proteasome is a multisubunit structure that degrades proteins. Protein degradation is an essential component of regulation because proteins can become misfolded, damaged, or unnecessary. Proteasomes and their homologues vary greatly in complexity: from HslV (heat shock locus v), which is encoded by 1 gene in bacteria, to the eukaryotic 20S proteasome, which is encoded by m…	GO:0006511|ubiquitin-dependent protein catabolic process;	GO:0005737|cytoplasm;GO:0005634|nucleus;GO:0019773|proteasome core complex, alpha-subunit complex;	GO:0004298|threonine-type endopeptidase activity;	.	.
PB.5213	PuSMRT_PB.5213.3_transcript30073_f2p0_737_g1,PuSMRT_PB.5213.1_transcript14907_f2p0_1564_g1/PuSMRT_PB.5213.2_transcript16170_f2p0_1462_g1/PuSMRT_PB.5213.4_transcript34348_f3p0_540_g1	+	1^,2^	Alternative 5' splice site(A5SS)	gi|566176030|ref|XM_006381384.1|	911	0	Populus trichocarpa 29 kDa ribonucleoprotein (POPTR_0006s12910g) mRNA, complete cds	Potri.006G127200	gi|566176031|ref|XP_006381446.1|	1245	7e-165	29 kDa ribonucleoprotein [Populus trichocarpa]	Q9ZUU4	296	2e-93	RNA-binding protein CP29B, chloroplastic	.	.	.	.	pfam00076	RRM_1	RNA recognition motif. (a.k.a. RRM, RBD, or RNP domain). The RRM motif is probably diagnostic of an RNA binding protein. RRMs are found in a variety of RNA binding proteins, including various hnRNP proteins, proteins implicated in regulation of alternative splicing, and protein components of snRNPs. The motif also appears in a few single stranded DNA binding proteins. The RRM structure consists o…	GO:0045087|innate immune response;GO:0006397|mRNA processing;GO:0009737|response to abscisic acid;GO:0009409|response to cold;	GO:0009507|chloroplast;GO:0009941|chloroplast envelope;GO:0009570|chloroplast stroma;GO:0009534|chloroplast thylakoid;GO:0009535|chloroplast thylakoid membrane;GO:0030529|ribonucleoprotein complex;GO:0010319|stromule;GO:0009579|thylakoid;	GO:0000166|nucleotide binding;GO:0008266|poly(U) RNA binding;	K11294	NCL, NSR1; nucleolin
PB.522	PuSMRT_PB.522.2_transcript12406_f2p0_1755_g1,PuSMRT_PB.522.1_transcript12865_f3p0_1721_g1	-	0,1^2-	Retained intron(RI)	gi|566149127|ref|XM_006368909.1|	1541	0	Populus trichocarpa hypothetical protein (POPTR_0001s15330g) mRNA, complete cds	Potri.001G153400	gi|566149128|ref|XP_006368971.1|	2307	0	hypothetical protein POPTR_0001s15330g [Populus trichocarpa]	Q9LVW7	675	0	Carbamoyl-phosphate synthase small chain, chloroplastic	alr1155	404	1e-134	COG0505	pfam00988	CPSase_sm_chain	Carbamoyl-phosphate synthase small chain, CPSase domain. The carbamoyl-phosphate synthase domain is in the amino terminus of protein. Carbamoyl-phosphate synthase catalyses the ATP-dependent synthesis of carbamyl-phosphate from glutamine or ammonia and bicarbonate. This important enzyme initiates both the urea cycle and the biosynthesis of arginine and/or pyrimidines. The carbamoyl-phosphate synt…	GO:0006207|'de novo' pyrimidine nucleobase biosynthetic process;GO:0044205|'de novo' UMP biosynthetic process;GO:0006526|arginine biosynthetic process;GO:0016036|cellular response to phosphate starvation;GO:0006541|glutamine metabolic process;GO:0000050|urea cycle;	GO:0005951|carbamoyl-phosphate synthase complex;GO:0009507|chloroplast;GO:0009570|chloroplast stroma;	GO:0005524|ATP binding;GO:0004088|carbamoyl-phosphate synthase (glutamine-hydrolyzing) activity;	K01956	carA, CPA1; carbamoyl-phosphate synthase small subunit [EC:6.3.5.5]
PB.5240	PuSMRT_PB.5240.1_transcript9515_f2p0_2031_g1,PuSMRT_PB.5240.2_transcript12000_f9p0_1755_g1	+	0,1^2-	Retained intron(RI)	gi|566176180|ref|XM_006381458.1|	1803	0	Populus trichocarpa kinase family protein (POPTR_0006s13560g) mRNA, complete cds	Potri.006G133300	gi|566176181|ref|XP_006381520.1|	1945	0	kinase family protein [Populus trichocarpa]	Q0WRY5	571	0	Serine/threonine-protein kinase CDL1	.	.	.	.	pfam07714	Pkinase_Tyr	Protein tyrosine kinase.	GO:0009742|brassinosteroid mediated signaling pathway;GO:1900459|positive regulation of brassinosteroid mediated signaling pathway;	GO:0005886|plasma membrane;	GO:0005524|ATP binding;GO:0004674|protein serine/threonine kinase activity;	.	.
PB.5251	PuSMRT_PB.5251.10_transcript9066_f16p0_2068_g1/PuSMRT_PB.5251.11_transcript13938_f7p0_1601_g1/PuSMRT_PB.5251.12_transcript16847_f6p0_1403_g1/PuSMRT_PB.5251.13_transcript20251_f5p0_1177_g1/PuSMRT_PB.5251.14_transcript24991_f7p0_934_g1/PuSMRT_PB.5251.1_transcript3299_f3p0_3138_g1/PuSMRT_PB.5251.2_transcript3834_f3p0_3007_g1/PuSMRT_PB.5251.3_transcript4724_f2p0_2792_g1/PuSMRT_PB.5251.5_transcript491…	+	1-,2-	Alternative 3' splice site(A3SS)	gi|319748377|gb|GU559730.1|	2984	0	Populus trichocarpa sucrose synthase 2 (SuS2) mRNA, complete cds	Potri.006G136700	gi|566176273|ref|XP_006381564.1|	4115	0	sucrose synthase family protein [Populus trichocarpa]	P13708	1400	0	Sucrose synthase	.	.	.	.	pfam00862	Sucrose_synth	Sucrose synthase. Sucrose synthases catalyse the synthesis of sucrose from UDP-glucose and fructose. This family includes the bulk of the sucrose synthase protein. However the carboxyl terminal region of the sucrose synthases belongs to the glycosyl transferase family pfam00534.	GO:0009877|nodulation;GO:0005985|sucrose metabolic process;	.	GO:0016157|sucrose synthase activity;	K00695	E2.4.1.13; sucrose synthase [EC:2.4.1.13]
PB.526	PuSMRT_PB.526.1_transcript21692_f2p0_1154_g1,PuSMRT_PB.526.2_transcript26118_f2p0_915_g1	+	1-,2-	Alternative 3' splice site(A3SS)	gi|743908313|ref|XM_011049302.1|	920	0	PREDICTED: Populus euphratica deSI-like protein At4g17486 (LOC105141911), transcript variant X5, mRNA	Potri.001G154400	gi|743908320|ref|XP_011047607.1|	1035	2e-136	PREDICTED: deSI-like protein At4g17486 isoform X3 [Populus euphratica]	Q93VG8	297	1e-96	DeSI-like protein At4g17486	.	.	.	.	pfam05903	Peptidase_C97	PPPDE putative peptidase domain. The PPPDE superfamily (after Permuted Papain fold Peptidases of DsRNA viruses and Eukaryotes), consists of predicted thiol peptidases with a circularly permuted papain-like fold. The inference of the likely DUB function of the PPPDE superfamily proteins is based on the fusions of the catalytic domain to Ub-binding PUG (PUB)/UBA domains and a novel alpha-helical Ub…	.	.	GO:0008233|peptidase activity;	.	.
PB.5282	PuSMRT_PB.5282.2_transcript3687_f2p0_3074_g1,PuSMRT_PB.5282.1_transcript1424_f2p0_3766_g1	-	1^,2^	Alternative 5' splice site(A5SS)	gi|566176428|ref|XM_006381578.1|	3620	0	Populus trichocarpa phosphoprotein (POPTR_0006s14570g) mRNA, complete cds	Potri.006G143300	gi|566176429|ref|XP_006381640.1|	5238	0	phosphoprotein [Populus trichocarpa]	B5X0I6	1507	0	Protein CTR9 homolog	SPAC27D7.14c	157	4e-38	COG0457	pfam13424	TPR_12	Tetratricopeptide repeat.	GO:0009908|flower development;GO:0016571|histone methylation;GO:0009910|negative regulation of flower development;GO:0045893|positive regulation of transcription, DNA-templated;GO:0051569|regulation of histone H3-K4 methylation;GO:0006351|transcription, DNA-templated;	GO:0016593|Cdc73/Paf1 complex;GO:0016020|membrane;GO:0005634|nucleus;	GO:0000993|RNA polymerase II core binding;	K15176	CTR9; RNA polymerase-associated protein CTR9
PB.529	PuSMRT_PB.529.2_transcript19586_f2p0_1252_g1,PuSMRT_PB.529.1_transcript13147_f6p0_1653_g1	-	0,1^2-	Retained intron(RI)	gi|566149161|ref|XM_006368926.1|	977	0	Populus trichocarpa dual specificity protein phosphatase (POPTR_0001s15460g) mRNA, complete cds	Potri.001G154700	gi|118487498|gb|ABK95576.1|	841	9e-179	unknown [Populus trichocarpa]	Q9ZQP1	245	2e-98	Putative dual specificity protein phosphatase DSP8	.	.	.	.	pfam00782	DSPc	Dual specificity phosphatase, catalytic domain. Ser/Thr and Tyr protein phosphatases. The enzyme's tertiary fold is highly similar to that of tyrosine-specific phosphatases, except for a "recognition" region.	.	.	GO:0004439|phosphatidylinositol-4,5-bisphosphate 5-phosphatase activity;GO:0004725|protein tyrosine phosphatase activity;GO:0008138|protein tyrosine/serine/threonine phosphatase activity;	.	.
PB.5304	PuSMRT_PB.5304.1_transcript7560_f2p0_2286_g1,PuSMRT_PB.5304.2_transcript8268_f6p0_2182_g1	-	0,1^2-	Retained intron(RI)	gi|566176497|ref|XM_002309176.2|	1985	0	Populus trichocarpa casein kinase family protein (POPTR_0006s15000g) mRNA, complete cds	Potri.006G147800	gi|224091248|ref|XP_002309212.1|	2252	0	casein kinase family protein [Populus trichocarpa]	Q9CAI5	626	0	Casein kinase 1-like protein 2	.	.	.	.	pfam00069	Pkinase	Protein kinase domain.	GO:0006897|endocytosis;GO:0018105|peptidyl-serine phosphorylation;GO:0008360|regulation of cell shape;GO:0016055|Wnt signaling pathway;	GO:0005737|cytoplasm;GO:0005634|nucleus;GO:0005886|plasma membrane;	GO:0005524|ATP binding;GO:0004674|protein serine/threonine kinase activity;	K02218	CSNK1, CK1; casein kinase 1 [EC:2.7.11.1]
PB.5320	PuSMRT_PB.5320.4_transcript6648_f3p0_2436_g1,PuSMRT_PB.5320.1_transcript10350_f3p0_1944_g1/PuSMRT_PB.5320.5_transcript11768_f15p0_1786_g1	-	0,1^2-	Retained intron(RI)	gi|566176583|ref|XM_006381620.1|	1727	0	Populus trichocarpa WD-40 repeat protein MSI4 (POPTR_0006s15630g) mRNA, complete cds	Potri.006G151800	gi|566176584|ref|XP_006381682.1|	2519	0	WD-40 repeat protein MSI4 [Populus trichocarpa]	O22607	808	0	WD-40 repeat-containing protein MSI4	.	.	.	.	pfam12265	CAF1C_H4-bd	Histone-binding protein RBBP4 or subunit C of CAF1 complex. The CAF-1 complex is a conserved heterotrimeric protein complex that promotes histone H3 and H4 deposition onto newly synthesized DNA during replication or DNA repair; specifically it facilitates replication-dependent nucleosome assembly with the major histone H3 (H3.1). This domain is an alpha helix which sits just upstream of the WD40 …	GO:0030154|cell differentiation;GO:0016569|covalent chromatin modification;GO:0006281|DNA repair;GO:0009908|flower development;GO:0006355|regulation of transcription, DNA-templated;GO:0010224|response to UV-B;GO:0006351|transcription, DNA-templated;	GO:0080008|Cul4-RING E3 ubiquitin ligase complex;GO:0005737|cytoplasm;GO:0005829|cytosol;GO:0005730|nucleolus;GO:0005634|nucleus;	GO:0046872|metal ion binding;	K10752	RBBP4, HAT2, CAF1, MIS16; histone-binding protein RBBP4
PB.5330	PuSMRT_PB.5330.2_transcript20885_f3p0_1194_g1/PuSMRT_PB.5330.3_transcript24739_f2p0_995_g1,PuSMRT_PB.5330.1_transcript22684_f2p0_1089_g1	+	1-,2-	Alternative 3' splice site(A3SS)	.	.	.	.	Potri.006G154100	.	.	.	.	.	.	.	.	.	.	.	.	pfam04749	PLAC8	PLAC8 family. This family includes the Placenta-specific gene 8 protein.	.	.	.	.	.
PB.536	PuSMRT_PB.536.1_transcript639_f2p0_4338_g1,PuSMRT_PB.536.2_transcript5708_f2p0_2613_g1	+	1-,2-	Alternative 3' splice site(A3SS)	gi|743915089|ref|XM_011003187.1|	4744	0	PREDICTED: Populus euphratica protein transport protein SEC16B homolog (LOC105108750), transcript variant X1, mRNA	Potri.001G157800	gi|743915090|ref|XP_011001489.1|	6522	0	PREDICTED: protein transport protein SEC16B homolog isoform X1 [Populus euphratica]	Q9FGK8	1113	0	Protein transport protein SEC16B homolog	.	.	.	.	pfam12931	Sec16_C	Sec23-binding domain of Sec16. Sec16 is a multi-domain vesicle coat protein. The C-terminal region is the part that binds to Sec23, a COPII vesicle coat protein. This association is part of the transport vesicle coat structure.	GO:0048208|COPII vesicle coating;GO:0015031|protein transport;	GO:0005783|endoplasmic reticulum;GO:0000139|Golgi membrane;	.	.	.
PB.5360	PuSMRT_PB.5360.1_transcript4336_f3p0_2862_g1,PuSMRT_PB.5360.2_transcript5294_f4p0_2668_g1	+	0,1^2-	Retained intron(RI)	gi|743930527|ref|XM_011011214.1|	2324	0	PREDICTED: Populus euphratica VIN3-like protein 2 (LOC105114620), transcript variant X2, mRNA	Potri.006G167800	gi|743930532|ref|XP_011009518.1|	3802	0	PREDICTED: VIN3-like protein 2 isoform X2 [Populus euphratica]	Q9SUM4	623	0	VIN3-like protein 2	.	.	.	.	pfam07227	DUF1423	Protein of unknown function (DUF1423). This family represents a conserved region approximately 500 residues long within a number of Arabidopsis thaliana proteins of unknown function.	GO:0032922|circadian regulation of gene expression;GO:0009908|flower development;GO:1900111|positive regulation of histone H3-K9 dimethylation;GO:0048587|regulation of short-day photoperiodism, flowering;GO:0006355|regulation of transcription, DNA-templated;GO:0009409|response to cold;GO:0006351|transcription, DNA-templated;	GO:0005677|chromatin silencing complex;GO:0031519|PcG protein complex;GO:0009506|plasmodesma;	GO:0003677|DNA binding;GO:0042802|identical protein binding;GO:0046872|metal ion binding;GO:0035064|methylated histone binding;	.	.
PB.545	PuSMRT_PB.545.1_transcript26227_f2p0_904_g1,PuSMRT_PB.545.2_transcript28884_f4p0_771_g1	+	1-,2-	Alternative 3' splice site(A3SS)	gi|566149295|ref|XM_006368993.1|	1257	0	Populus trichocarpa hypothetical protein (POPTR_0001s16060g) mRNA, complete cds	Potri.001G160500	gi|566149296|ref|XP_006369055.1|	539	1e-64	hypothetical protein POPTR_0001s16060g [Populus trichocarpa]	.	.	.	.	.	.	.	.	pfam09446	VMA21	VMA21-like domain. This presumed short domain appears to contain two potential transmembrane helices. VMA21 is localized in the ER where it is needed as an accessory factor for assembly of the V0 component of the vacuolar ATPase.	.	.	.	.	.
PB.5466	PuSMRT_PB.5466.2_transcript1018_f2p0_4007_g1,PuSMRT_PB.5466.1_transcript2466_f4p0_3370_g1/PuSMRT_PB.5466.3_transcript2275_f4p0_3425_g1/PuSMRT_PB.5466.4_transcript2813_f18p0_3229_g1	-	0,1^2-	Retained intron(RI)	gi|743906064|ref|XM_011048143.1|	3131	0	PREDICTED: Populus euphratica ubiquitin carboxyl-terminal hydrolase 8-like (LOC105141053), mRNA	Potri.006G201100	gi|743906065|ref|XP_011046445.1|	4553	0	PREDICTED: ubiquitin carboxyl-terminal hydrolase 8-like [Populus euphratica]	Q9C585	843	0	Ubiquitin carboxyl-terminal hydrolase 8	SPCC1494.05c	235	4e-63	COG5560	pfam00443	UCH	Ubiquitin carboxyl-terminal hydrolase.	GO:0016579|protein deubiquitination;GO:0006511|ubiquitin-dependent protein catabolic process;	.	GO:0004843|ubiquitin-specific protease activity;	K11835	USP4_11_15, UBP12; ubiquitin carboxyl-terminal hydrolase 4/11/15 [EC:3.4.19.12]
PB.5466	PuSMRT_PB.5466.3_transcript2275_f4p0_3425_g1,PuSMRT_PB.5466.1_transcript2466_f4p0_3370_g1/PuSMRT_PB.5466.2_transcript1018_f2p0_4007_g1/PuSMRT_PB.5466.4_transcript2813_f18p0_3229_g1	-	0,1^2-	Retained intron(RI)	gi|743906064|ref|XM_011048143.1|	3131	0	PREDICTED: Populus euphratica ubiquitin carboxyl-terminal hydrolase 8-like (LOC105141053), mRNA	Potri.006G201100	gi|743906065|ref|XP_011046445.1|	4553	0	PREDICTED: ubiquitin carboxyl-terminal hydrolase 8-like [Populus euphratica]	Q9C585	843	0	Ubiquitin carboxyl-terminal hydrolase 8	SPCC1494.05c	235	4e-63	COG5560	pfam00443	UCH	Ubiquitin carboxyl-terminal hydrolase.	GO:0016579|protein deubiquitination;GO:0006511|ubiquitin-dependent protein catabolic process;	.	GO:0004843|ubiquitin-specific protease activity;	K11835	USP4_11_15, UBP12; ubiquitin carboxyl-terminal hydrolase 4/11/15 [EC:3.4.19.12]
PB.5488	PuSMRT_PB.5488.1_transcript14130_f5p0_1616_g1,PuSMRT_PB.5488.2_transcript21497_f2p0_1136_g1	-	1-,2-	Alternative 3' splice site(A3SS)	gi|743906994|ref|XM_011048622.1|	1483	0	PREDICTED: Populus euphratica mRNA-decapping enzyme-like protein (LOC105141414), mRNA	Potri.006G208600	gi|743906995|ref|XP_011046924.1|	1470	0	PREDICTED: mRNA-decapping enzyme-like protein [Populus euphratica]	Q9SJF3	335	5e-108	mRNA-decapping enzyme-like protein	.	.	.	.	pfam06058	DCP1	Dcp1-like decapping family. An essential step in mRNA turnover is decapping. In yeast, two proteins have been identified that are essential for decapping, Dcp1 (this family) and Dcp2 (pfam05026). The precise role of these proteins in the decapping reaction have not been established. Evidence suggests that the Dcp1 may enhance the function of Dcp2.	GO:0000290|deadenylation-dependent decapping of nuclear-transcribed mRNA;GO:0031087|deadenylation-independent decapping of nuclear-transcribed mRNA;GO:0006952|defense response;GO:0006397|mRNA processing;	GO:0005737|cytoplasm;GO:0000932|cytoplasmic mRNA processing body;	GO:0008047|enzyme activator activity;GO:0030234|enzyme regulator activity;GO:0016787|hydrolase activity;GO:0003729|mRNA binding;	K12611	DCP1B; mRNA-decapping enzyme 1B [EC:3.-.-.-]
PB.5527	PuSMRT_PB.5527.11_transcript3903_f2p0_2975_g1/PuSMRT_PB.5527.12_transcript4261_f3p0_2883_g1/PuSMRT_PB.5527.9_transcript3170_f4p0_3157_g1,PuSMRT_PB.5527.13_transcript7901_f2p0_2239_g1	-	0,1^2-	Retained intron(RI)	gi|566177782|ref|XM_002309420.2|	1665	0	Populus trichocarpa small MutS related domain-containing family protein (POPTR_0006s23550g) mRNA, complete cds	Potri.006G218900	gi|224092057|ref|XP_002309456.1|	2180	0	small MutS related domain-containing family protein [Populus trichocarpa]	O64843	452	5e-143	Polyadenylate-binding protein-interacting protein 7	.	.	.	.	pfam08590	DUF1771	Domain of unknown function (DUF1771). This domain is always found adjacent to pfam01713.	GO:0006974|cellular response to DNA damage stimulus;GO:0006281|DNA repair;GO:0006270|DNA replication initiation;GO:0033314|mitotic DNA replication checkpoint;GO:0007095|mitotic G2 DNA damage checkpoint;GO:0007131|reciprocal meiotic recombination;GO:0010212|response to ionizing radiation;	GO:0015629|actin cytoskeleton;GO:0005813|centrosome;GO:0005694|chromosome;GO:0000794|condensed nuclear chromosome;GO:0005737|cytoplasm;GO:0005794|Golgi apparatus;GO:0001673|male germ cell nucleus;GO:0005634|nucleus;GO:0016605|PML body;GO:0000922|spindle pole;	GO:0003677|DNA binding;GO:0042802|identical protein binding;	.	.
PB.5527	PuSMRT_PB.5527.11_transcript3903_f2p0_2975_g1/PuSMRT_PB.5527.12_transcript4261_f3p0_2883_g1/PuSMRT_PB.5527.9_transcript3170_f4p0_3157_g1,PuSMRT_PB.5527.16_transcript4516_f2p0_2842_g1/PuSMRT_PB.5527.3_transcript3184_f2p0_3195_g1/PuSMRT_PB.5527.6_transcript3551_f3p0_3068_g1	-	0,1^2-	Retained intron(RI)	gi|566177782|ref|XM_002309420.2|	1665	0	Populus trichocarpa small MutS related domain-containing family protein (POPTR_0006s23550g) mRNA, complete cds	Potri.006G218900	gi|224092057|ref|XP_002309456.1|	2180	0	small MutS related domain-containing family protein [Populus trichocarpa]	O64843	452	5e-143	Polyadenylate-binding protein-interacting protein 7	.	.	.	.	pfam08590	DUF1771	Domain of unknown function (DUF1771). This domain is always found adjacent to pfam01713.	GO:0006974|cellular response to DNA damage stimulus;GO:0006281|DNA repair;GO:0006270|DNA replication initiation;GO:0033314|mitotic DNA replication checkpoint;GO:0007095|mitotic G2 DNA damage checkpoint;GO:0007131|reciprocal meiotic recombination;GO:0010212|response to ionizing radiation;	GO:0015629|actin cytoskeleton;GO:0005813|centrosome;GO:0005694|chromosome;GO:0000794|condensed nuclear chromosome;GO:0005737|cytoplasm;GO:0005794|Golgi apparatus;GO:0001673|male germ cell nucleus;GO:0005634|nucleus;GO:0016605|PML body;GO:0000922|spindle pole;	GO:0003677|DNA binding;GO:0042802|identical protein binding;	.	.
PB.5527	PuSMRT_PB.5527.12_transcript4261_f3p0_2883_g1/PuSMRT_PB.5527.13_transcript7901_f2p0_2239_g1/PuSMRT_PB.5527.15_transcript8617_f7p0_2138_g1/PuSMRT_PB.5527.16_transcript4516_f2p0_2842_g1/PuSMRT_PB.5527.1_transcript6552_f2p0_2491_g1/PuSMRT_PB.5527.4_transcript1204_f2p0_3888_g1/PuSMRT_PB.5527.5_transcript647_f2p0_4309_g1/PuSMRT_PB.5527.6_transcript3551_f3p0_3068_g1/PuSMRT_PB.5527.9_transcript3170_f4p0…	-	0,1-2^	Skipped exon(SE)	gi|566177782|ref|XM_002309420.2|	1665	0	Populus trichocarpa small MutS related domain-containing family protein (POPTR_0006s23550g) mRNA, complete cds	Potri.006G218900	gi|224092057|ref|XP_002309456.1|	2180	0	small MutS related domain-containing family protein [Populus trichocarpa]	O64843	452	5e-143	Polyadenylate-binding protein-interacting protein 7	.	.	.	.	pfam08590	DUF1771	Domain of unknown function (DUF1771). This domain is always found adjacent to pfam01713.	GO:0006974|cellular response to DNA damage stimulus;GO:0006281|DNA repair;GO:0006270|DNA replication initiation;GO:0033314|mitotic DNA replication checkpoint;GO:0007095|mitotic G2 DNA damage checkpoint;GO:0007131|reciprocal meiotic recombination;GO:0010212|response to ionizing radiation;	GO:0015629|actin cytoskeleton;GO:0005813|centrosome;GO:0005694|chromosome;GO:0000794|condensed nuclear chromosome;GO:0005737|cytoplasm;GO:0005794|Golgi apparatus;GO:0001673|male germ cell nucleus;GO:0005634|nucleus;GO:0016605|PML body;GO:0000922|spindle pole;	GO:0003677|DNA binding;GO:0042802|identical protein binding;	.	.
PB.5527	PuSMRT_PB.5527.13_transcript7901_f2p0_2239_g1,PuSMRT_PB.5527.10_transcript11692_f3p0_1834_g1/PuSMRT_PB.5527.14_transcript7950_f4p0_2228_g1/PuSMRT_PB.5527.15_transcript8617_f7p0_2138_g1/PuSMRT_PB.5527.1_transcript6552_f2p0_2491_g1/PuSMRT_PB.5527.8_transcript6188_f3p0_2507_g1	-	0,1^2-	Retained intron(RI)	gi|566177782|ref|XM_002309420.2|	1665	0	Populus trichocarpa small MutS related domain-containing family protein (POPTR_0006s23550g) mRNA, complete cds	Potri.006G218900	gi|224092057|ref|XP_002309456.1|	2180	0	small MutS related domain-containing family protein [Populus trichocarpa]	O64843	452	5e-143	Polyadenylate-binding protein-interacting protein 7	.	.	.	.	pfam08590	DUF1771	Domain of unknown function (DUF1771). This domain is always found adjacent to pfam01713.	GO:0006974|cellular response to DNA damage stimulus;GO:0006281|DNA repair;GO:0006270|DNA replication initiation;GO:0033314|mitotic DNA replication checkpoint;GO:0007095|mitotic G2 DNA damage checkpoint;GO:0007131|reciprocal meiotic recombination;GO:0010212|response to ionizing radiation;	GO:0015629|actin cytoskeleton;GO:0005813|centrosome;GO:0005694|chromosome;GO:0000794|condensed nuclear chromosome;GO:0005737|cytoplasm;GO:0005794|Golgi apparatus;GO:0001673|male germ cell nucleus;GO:0005634|nucleus;GO:0016605|PML body;GO:0000922|spindle pole;	GO:0003677|DNA binding;GO:0042802|identical protein binding;	.	.
PB.5527	PuSMRT_PB.5527.16_transcript4516_f2p0_2842_g1/PuSMRT_PB.5527.3_transcript3184_f2p0_3195_g1/PuSMRT_PB.5527.6_transcript3551_f3p0_3068_g1,PuSMRT_PB.5527.10_transcript11692_f3p0_1834_g1/PuSMRT_PB.5527.14_transcript7950_f4p0_2228_g1/PuSMRT_PB.5527.15_transcript8617_f7p0_2138_g1/PuSMRT_PB.5527.1_transcript6552_f2p0_2491_g1/PuSMRT_PB.5527.7_transcript25186_f2p0_944_g1/PuSMRT_PB.5527.8_transcript6188_f3…	-	0,1^2-	Retained intron(RI)	gi|566177782|ref|XM_002309420.2|	1665	0	Populus trichocarpa small MutS related domain-containing family protein (POPTR_0006s23550g) mRNA, complete cds	Potri.006G218900	gi|224092057|ref|XP_002309456.1|	2180	0	small MutS related domain-containing family protein [Populus trichocarpa]	O64843	452	5e-143	Polyadenylate-binding protein-interacting protein 7	.	.	.	.	pfam08590	DUF1771	Domain of unknown function (DUF1771). This domain is always found adjacent to pfam01713.	GO:0006974|cellular response to DNA damage stimulus;GO:0006281|DNA repair;GO:0006270|DNA replication initiation;GO:0033314|mitotic DNA replication checkpoint;GO:0007095|mitotic G2 DNA damage checkpoint;GO:0007131|reciprocal meiotic recombination;GO:0010212|response to ionizing radiation;	GO:0015629|actin cytoskeleton;GO:0005813|centrosome;GO:0005694|chromosome;GO:0000794|condensed nuclear chromosome;GO:0005737|cytoplasm;GO:0005794|Golgi apparatus;GO:0001673|male germ cell nucleus;GO:0005634|nucleus;GO:0016605|PML body;GO:0000922|spindle pole;	GO:0003677|DNA binding;GO:0042802|identical protein binding;	.	.
PB.5527	PuSMRT_PB.5527.4_transcript1204_f2p0_3888_g1,PuSMRT_PB.5527.11_transcript3903_f2p0_2975_g1/PuSMRT_PB.5527.12_transcript4261_f3p0_2883_g1/PuSMRT_PB.5527.9_transcript3170_f4p0_3157_g1	-	0,1^2-	Retained intron(RI)	gi|566177782|ref|XM_002309420.2|	1665	0	Populus trichocarpa small MutS related domain-containing family protein (POPTR_0006s23550g) mRNA, complete cds	Potri.006G218900	gi|224092057|ref|XP_002309456.1|	2180	0	small MutS related domain-containing family protein [Populus trichocarpa]	O64843	452	5e-143	Polyadenylate-binding protein-interacting protein 7	.	.	.	.	pfam08590	DUF1771	Domain of unknown function (DUF1771). This domain is always found adjacent to pfam01713.	GO:0006974|cellular response to DNA damage stimulus;GO:0006281|DNA repair;GO:0006270|DNA replication initiation;GO:0033314|mitotic DNA replication checkpoint;GO:0007095|mitotic G2 DNA damage checkpoint;GO:0007131|reciprocal meiotic recombination;GO:0010212|response to ionizing radiation;	GO:0015629|actin cytoskeleton;GO:0005813|centrosome;GO:0005694|chromosome;GO:0000794|condensed nuclear chromosome;GO:0005737|cytoplasm;GO:0005794|Golgi apparatus;GO:0001673|male germ cell nucleus;GO:0005634|nucleus;GO:0016605|PML body;GO:0000922|spindle pole;	GO:0003677|DNA binding;GO:0042802|identical protein binding;	.	.
PB.5586	PuSMRT_PB.5586.2_transcript20037_f2p0_1221_g1,PuSMRT_PB.5586.1_transcript18517_f2p0_1277_g1	+	1-,2-	Alternative 3' splice site(A3SS)	gi|566177955|ref|XM_002308529.2|	1183	0	Populus trichocarpa hypothetical protein (POPTR_0006s24600g) mRNA, complete cds	Potri.006G229900	gi|566177956|ref|XP_002308565.2|	1291	2e-174	hypothetical protein POPTR_0006s24600g [Populus trichocarpa]	F4ITL6	360	3e-120	Protein REVERSION-TO-ETHYLENE SENSITIVITY1	.	.	.	.	pfam05608	DUF778	Protein of unknown function (DUF778). This family consists of several eukaryotic proteins of unknown function.	GO:0010105|negative regulation of ethylene-activated signaling pathway;GO:0009723|response to ethylene;	GO:0005783|endoplasmic reticulum;GO:0005789|endoplasmic reticulum membrane;GO:0005794|Golgi apparatus;GO:0000139|Golgi membrane;GO:0016021|integral component of membrane;	.	.	.
[truncated: 278 more rows]
