# Supplementary material for: Characterization of the Gene Expression Profile Response to Drought Stress in Populus ussuriensis Using PacBio SMRT and Illumina Sequencing
Source: Int J Mol Sci. 2022 Mar 30;23(7):3840. doi: 10.3390/ijms23073840 (PMC8998571; doi:10.3390/ijms23073840)
Supplement: Supplementary file 1 [file ijms-23-03840-s001.zip › Table S5.xls]

## Sheet: Sheet1
Table S5 Gene annotation
Gene_ID	NT_TopHit	NT_Score	NT_Evalue	NT_Description	NR_TopHit	NR_Score	NR_Evalue	NR_Description	BLASTX_Sprot_TopHit	BLASTX_Score	BLASTX_Evalue	BLASTX_Description	BLASTP_Sprot_TopHit	BLASTP_Score	BLASTP_Evalue	BLASTP_Description	PFAM_TopHit	PFAM_Name	PFAM_Description	eggNOG_TopHit	eggNOG_Description	SignalP	TmHMM	RNAMMER	GO_biological_process	GO_molecular_function	GO_cellular_component	KO	Map
f2p60_5637_39	gi|743924821|ref|XM_011008240.1|	8973	E:0	PREDICTED: Populus euphratica UDP-glucose:glycoprotein glucosyltransferase (LOC105112515), transcript variant X1, mRNA	gi|743924822|ref|XP_011006542.1|	3233	E:0	PREDICTED: UDP-glucose:glycoprotein glucosyltransferase isoform X1 [Populus euphratica]	UGGG_ARATH	2368	E:0	RecName: Full=UDP-glucose:glycoprotein glucosyltransferase;^Eukaryota; Viridiplantae; Streptophyta; Embryophyta; Tracheophyta; Spermatophyta; Magnoliophyta; eudicotyledons; Gunneridae; Pentapetalae; rosids; malvids; Brassicales; Brassicaceae; Camelineae; Arabidopsis	UGGG_ARATH	2385	E:0	RecName: Full=UDP-glucose:glycoprotein glucosyltransferase;^Eukaryota; Viridiplantae; Streptophyta; Embryophyta; Tracheophyta; Spermatophyta; Magnoliophyta; eudicotyledons; Gunneridae; Pentapetalae; rosids; malvids; Brassicales; Brassicaceae; Camelineae; Arabidopsis	PF06427.10	UDP-g_GGTase	UDP-glucose:Glycoprotein Glucosyltransferase	ENOG410XRK6	udp-glucose glycoprotein glucosyltransferase	sigP:1^29^0.787^YES	ExpAA=22.13^PredHel=1^Topology=i7-29o	.	GO:0051084|'de novo' posttranslational protein folding;GO:0046283|anthocyanin-containing compound metabolic process;GO:0010204|defense response signaling pathway, resistance gene-independent;GO:0030968|endoplasmic reticulum unfolded protein response;GO:0071712|ER-associated misfolded protein catabolic process;GO:0009626|plant-type hypersensitive response;GO:0018279|protein N-linked glycosylation …	GO:0003980|UDP-glucose:glycoprotein glucosyltransferase activity;GO:0051082|unfolded protein bindingGO:0003980|UDP-glucose:glycoprotein glucosyltransferase activity	GO:0005783|endoplasmic reticulum;GO:0005788|endoplasmic reticulum lumen	K11718|HUGT; UDP-glucose:glycoprotein glucosyltransferase [EC:2.4.1.-]	map04141|Protein processing in endoplasmic reticulum
f2p60_1916_22449	gi|566164125|ref|XM_006383762.1|	3410	E:0	Populus trichocarpa phosphatidate cytidylyltransferase family protein (POPTR_0004s00280g) mRNA, complete cds	gi|566164126|ref|XP_006383824.1|	870	E:0	phosphatidate cytidylyltransferase family protein [Populus trichocarpa]	CDS2_ARATH	702	E:0	RecName: Full=Phosphatidate cytidylyltransferase 2 {ECO:0000303|PubMed:20442275};^Eukaryota; Viridiplantae; Streptophyta; Embryophyta; Tracheophyta; Spermatophyta; Magnoliophyta; eudicotyledons; Gunneridae; Pentapetalae; rosids; malvids; Brassicales; Brassicaceae; Camelineae; Arabidopsis	CDS2_ARATH	701	E:0	RecName: Full=Phosphatidate cytidylyltransferase 2 {ECO:0000303|PubMed:20442275};^Eukaryota; Viridiplantae; Streptophyta; Embryophyta; Tracheophyta; Spermatophyta; Magnoliophyta; eudicotyledons; Gunneridae; Pentapetalae; rosids; malvids; Brassicales; Brassicaceae; Camelineae; Arabidopsis	PF01148.19	CTP_transf_1	Cytidylyltransferase family	COG0575	phosphatidate Cytidylyltransferase	.	ExpAA=160.43^PredHel=7^Topology=o60-82i103-125o147-169i182-204o209-231i244-266o317-339i	.	GO:0016024|CDP-diacylglycerol biosynthetic process;GO:0006655|phosphatidylglycerol biosynthetic process	GO:0004605|phosphatidate cytidylyltransferase activity	GO:0005789|endoplasmic reticulum membrane;GO:0016021|integral component of membrane	K00981|E2.7.7.41, CDS1, CDS2, cdsA; phosphatidate cytidylyltransferase [EC:2.7.7.41]	map04070|Phosphatidylinositol signaling system;map01100|Metabolic pathways;map01110|Biosynthesis of secondary metabolites;map00564|Glycerophospholipid metabolism
f2p60_902_11889	gi|566181215|ref|XM_002310810.2|	1500	E:0	Populus trichocarpa hypothetical protein (POPTR_0007s13890g) mRNA, complete cds	gi|224097134|ref|XP_002310846.1|	226	E:7e-71	hypothetical protein POPTR_0007s13890g [Populus trichocarpa]	VATL2_ARATH	225	E:1e-71	RecName: Full=V-type proton ATPase subunit c2;^Eukaryota; Viridiplantae; Streptophyta; Embryophyta; Tracheophyta; Spermatophyta; Magnoliophyta; eudicotyledons; Gunneridae; Pentapetalae; rosids; malvids; Brassicales; Brassicaceae; Camelineae; Arabidopsis	VATL2_ARATH	316	E:2e-109	RecName: Full=V-type proton ATPase subunit c2;^Eukaryota; Viridiplantae; Streptophyta; Embryophyta; Tracheophyta; Spermatophyta; Magnoliophyta; eudicotyledons; Gunneridae; Pentapetalae; rosids; malvids; Brassicales; Brassicaceae; Camelineae; Arabidopsis	PF00137.20	ATP-synt_C	ATP synthase subunit C	COG0636	F(1)F(0) ATP synthase produces ATP from ADP in the presence of a proton or sodium gradient. F-type ATPases consist of two structural domains, F(1) containing the extramembraneous catalytic core and F(0) containing the membrane proton channel, linked together by a central stalk and a peripheral stalk. During catalysis, ATP synthesis in the catalytic domain of F(1) is coupled via a rotary mechanism…	.	ExpAA=91.23^PredHel=4^Topology=i20-42o62-84i101-123o138-160i	.	GO:0015991|ATP hydrolysis coupled proton transport;GO:0007035|vacuolar acidificationGO:0015991|ATP hydrolysis coupled proton transport	GO:0046961|proton-transporting ATPase activity, rotational mechanismGO:0015078|hydrogen ion transmembrane transporter activity	GO:0016021|integral component of membrane;GO:0005774|vacuolar membrane;GO:0000220|vacuolar proton-transporting V-type ATPase, V0 domain;GO:0005773|vacuoleGO:0033177|proton-transporting two-sector ATPase complex, proton-transporting domain	K02155|ATPeV0C, ATP6L; V-type H+-transporting ATPase 16kDa proteolipid subunit	map05110|Vibrio cholerae infection;map04142|Lysosome;map04145|Phagosome;map05120|Epithelial cell signaling in Helicobacter pylori infection;map05152|Tuberculosis;map04721|Synaptic vesicle cycle;map05323|Rheumatoid arthritis;map04966|Collecting duct acid secretion;map01100|Metabolic pathways;map00190|Oxidative phosphorylation
f2p60_1013_29924	gi|224057967|ref|XM_002299378.1|	1797	E:0	Populus trichocarpa photosystem I chain III family protein (POPTR_0001s11600g) mRNA, complete cds	gi|224057968|ref|XP_002299414.1|	401	E:6e-138	photosystem I chain III family protein [Populus trichocarpa]	PSAF_ARATH	308	E:8e-103	RecName: Full=Photosystem I reaction center subunit III, chloroplastic;^Eukaryota; Viridiplantae; Streptophyta; Embryophyta; Tracheophyta; Spermatophyta; Magnoliophyta; eudicotyledons; Gunneridae; Pentapetalae; rosids; malvids; Brassicales; Brassicaceae; Camelineae; Arabidopsis	PSAF_ARATH	350	E:5e-121	RecName: Full=Photosystem I reaction center subunit III, chloroplastic;^Eukaryota; Viridiplantae; Streptophyta; Embryophyta; Tracheophyta; Spermatophyta; Magnoliophyta; eudicotyledons; Gunneridae; Pentapetalae; rosids; malvids; Brassicales; Brassicaceae; Camelineae; Arabidopsis	PF02507.14	PSI_PsaF	Photosystem I reaction centre subunit III	ENOG4111JQH	photosystem i	.	ExpAA=38.22^PredHel=2^Topology=o154-176i189-211o	.	GO:0015979|photosynthesisGO:0015979|photosynthesis	GO:0019904|protein domain specific binding	GO:0009507|chloroplast;GO:0009941|chloroplast envelope;GO:0009534|chloroplast thylakoid;GO:0009535|chloroplast thylakoid membrane;GO:0016021|integral component of membrane;GO:0016020|membrane;GO:0009538|photosystem I reaction center;GO:0010287|plastoglobule;GO:0009579|thylakoidGO:0009522|photosystem I;GO:0009538|photosystem I reaction center	K02694|psaF; photosystem I subunit III	map01100|Metabolic pathways;map00195|Photosynthesis
f3p60_1899_22514	gi|566234642|ref|XM_006371197.1|	3365	E:0	Populus trichocarpa hypothetical protein (POPTR_0019s07830g) mRNA, complete cds	gi|566234643|ref|XP_006371259.1|	1101	E:0	hypothetical protein POPTR_0019s07830g [Populus trichocarpa]	HRD1A_ARATH	661	E:0	RecName: Full=ERAD-associated E3 ubiquitin-protein ligase HRD1A {ECO:0000305};^Eukaryota; Viridiplantae; Streptophyta; Embryophyta; Tracheophyta; Spermatophyta; Magnoliophyta; eudicotyledons; Gunneridae; Pentapetalae; rosids; malvids; Brassicales; Brassicaceae; Camelineae; Arabidopsis	HRD1A_ARATH	664	E:0	RecName: Full=ERAD-associated E3 ubiquitin-protein ligase HRD1A {ECO:0000305};^Eukaryota; Viridiplantae; Streptophyta; Embryophyta; Tracheophyta; Spermatophyta; Magnoliophyta; eudicotyledons; Gunneridae; Pentapetalae; rosids; malvids; Brassicales; Brassicaceae; Camelineae; Arabidopsis	PF12678.6	zf-rbx1	RING-H2 zinc finger domain	COG5243	zinc ion binding	.	ExpAA=124.26^PredHel=6^Topology=i7-24o39-61i99-121o141-160i173-195o224-246i	.	GO:0030968|endoplasmic reticulum unfolded protein response;GO:0000209|protein polyubiquitination;GO:0042787|protein ubiquitination involved in ubiquitin-dependent protein catabolic process;GO:0030433|ubiquitin-dependent ERAD pathway	GO:0046872|metal ion binding;GO:1904264|ubiquitin protein ligase activity involved in ERAD pathway;GO:1990381|ubiquitin-specific protease binding;GO:0051082|unfolded protein bindingGO:0008270|zinc ion binding;GO:0046872|metal ion binding	GO:0036513|Derlin-1 retrotranslocation complex;GO:0044322|endoplasmic reticulum quality control compartment;GO:0000836|Hrd1p ubiquitin ligase complex;GO:0016021|integral component of membrane	K10601|SYVN1, HRD1; E3 ubiquitin-protein ligase synoviolin [EC:2.3.2.27]	map04141|Protein processing in endoplasmic reticulum;map04120|Ubiquitin mediated proteolysis
f4p60_2471_20446	gi|566165532|ref|XM_002305194.2|	4403	E:0	Populus trichocarpa nicastrin-related family protein (POPTR_0004s08120g) mRNA, complete cds	gi|566165533|ref|XP_002305230.2|	1250	E:0	nicastrin-related family protein [Populus trichocarpa]	NICA_ARATH	834	E:0	RecName: Full=Nicastrin;^Eukaryota; Viridiplantae; Streptophyta; Embryophyta; Tracheophyta; Spermatophyta; Magnoliophyta; eudicotyledons; Gunneridae; Pentapetalae; rosids; malvids; Brassicales; Brassicaceae; Camelineae; Arabidopsis	NICA_ARATH	864	E:0	RecName: Full=Nicastrin;^Eukaryota; Viridiplantae; Streptophyta; Embryophyta; Tracheophyta; Spermatophyta; Magnoliophyta; eudicotyledons; Gunneridae; Pentapetalae; rosids; malvids; Brassicales; Brassicaceae; Camelineae; Arabidopsis	PF04389.16	Peptidase_M28	Peptidase family M28	ENOG410XT6X	nicastrin	.	ExpAA=26.41^PredHel=1^Topology=o641-663i	.	GO:0007219|Notch signaling pathway;GO:0016485|protein processingGO:0016485|protein processing	GO:0004175|endopeptidase activity	GO:0005887|integral component of plasma membraneGO:0016021|integral component of membrane	K06171|NCSTN; nicastrin	map04330|Notch signaling pathway;map05010|Alzheimer's disease
f3p60_1811_5275	gi|566153713|ref|XM_006370050.1|	3195	E:0	Populus trichocarpa hypothetical protein (POPTR_0001s39590g) mRNA, complete cds	gi|566153712|ref|XP_006370111.1|	962	E:0	transport protein sec61 [Populus trichocarpa]	SC61A_DICDI	725	E:0	RecName: Full=Protein transport protein Sec61 subunit alpha;^Eukaryota; Amoebozoa; Mycetozoa; Dictyosteliida; Dictyostelium	SC61A_DICDI	725	E:0	RecName: Full=Protein transport protein Sec61 subunit alpha;^Eukaryota; Amoebozoa; Mycetozoa; Dictyosteliida; Dictyostelium	PF10559.8	Plug_translocon	Plug domain of Sec61p	COG0201	The central subunit of the protein translocation channel SecYEG. Consists of two halves formed by TMs 1-5 and 6-10. These two domains form a lateral gate at the front which open onto the bilayer between TMs 2 and 7, and are clamped together by SecE at the back. The channel is closed by both a pore ring composed of hydrophobic SecY resides and a short helix (helix 2A) on the extracellular side of …	.	ExpAA=224.42^PredHel=8^Topology=i34-56o76-98i119-141o146-168i244-266o286-308i415-437o441-460i	.	GO:0031204|posttranslational protein targeting to membrane, translocationGO:0015031|protein transport	GO:0015450|P-P-bond-hydrolysis-driven protein transmembrane transporter activity	GO:0005783|endoplasmic reticulum;GO:0005789|endoplasmic reticulum membrane;GO:0016021|integral component of membraneGO:0016020|membrane	K10956|SEC61A; protein transport protein SEC61 subunit alpha	map04141|Protein processing in endoplasmic reticulum;map05110|Vibrio cholerae infection;map04145|Phagosome;map03060|Protein export
f2p47_1957_22258	gi|224072462|ref|XM_002303708.1|	3432	E:0	Populus trichocarpa cytochrome p450 51 family protein (POPTR_0003s16010g) mRNA, complete cds	gi|224072463|ref|XP_002303744.1|	966	E:0	cytochrome p450 51 family protein [Populus trichocarpa]	CP511_ARATH	827	E:0	RecName: Full=Sterol 14-demethylase;^Eukaryota; Viridiplantae; Streptophyta; Embryophyta; Tracheophyta; Spermatophyta; Magnoliophyta; eudicotyledons; Gunneridae; Pentapetalae; rosids; malvids; Brassicales; Brassicaceae; Camelineae; Arabidopsis	CP511_ARATH	853	E:0	RecName: Full=Sterol 14-demethylase;^Eukaryota; Viridiplantae; Streptophyta; Embryophyta; Tracheophyta; Spermatophyta; Magnoliophyta; eudicotyledons; Gunneridae; Pentapetalae; rosids; malvids; Brassicales; Brassicaceae; Camelineae; Arabidopsis	PF00067.21	p450	Cytochrome P450	COG2124	Cytochrome p450	.	ExpAA=22.49^PredHel=1^Topology=i9-31o	.	GO:0016126|sterol biosynthetic processGO:0055114|oxidation-reduction process	GO:0020037|heme binding;GO:0005506|iron ion binding;GO:0008168|methyltransferase activity;GO:0008398|sterol 14-demethylase activityGO:0005506|iron ion binding;GO:0016705|oxidoreductase activity, acting on paired donors, with incorporation or reduction of molecular oxygen;GO:0020037|heme binding	GO:0005783|endoplasmic reticulum;GO:0005794|Golgi apparatus;GO:0016021|integral component of membrane;GO:0005886|plasma membrane	K05917|CYP51; sterol 14-demethylase [EC:1.14.13.70]	map00100|Steroid biosynthesis;map01100|Metabolic pathways;map01110|Biosynthesis of secondary metabolites;map01130|Biosynthesis of antibiotics
f3p60_4603_158	gi|743880000|ref|XR_843849.1|	7803	E:0	PREDICTED: Populus euphratica histidine kinase 3-like (LOC105133705), transcript variant X1, misc_RNA	gi|224053503|ref|XP_002297846.1|	2092	E:0	histidine kinase receptor family protein [Populus trichocarpa]	AHK3_ARATH	1395	E:0	RecName: Full=Histidine kinase 3;^Eukaryota; Viridiplantae; Streptophyta; Embryophyta; Tracheophyta; Spermatophyta; Magnoliophyta; eudicotyledons; Gunneridae; Pentapetalae; rosids; malvids; Brassicales; Brassicaceae; Camelineae; Arabidopsis	AHK3_ARATH	1402	E:0	RecName: Full=Histidine kinase 3;^Eukaryota; Viridiplantae; Streptophyta; Embryophyta; Tracheophyta; Spermatophyta; Magnoliophyta; eudicotyledons; Gunneridae; Pentapetalae; rosids; malvids; Brassicales; Brassicaceae; Camelineae; Arabidopsis	PF03924.12	CHASE	CHASE domain	COG0642	Histidine kinase	.	ExpAA=69.56^PredHel=3^Topology=i13-35o88-106i391-413o	.	GO:0071215|cellular response to abscisic acid stimulus;GO:0070417|cellular response to cold;GO:0016036|cellular response to phosphate starvation;GO:0071329|cellular response to sucrose stimulus;GO:0009736|cytokinin-activated signaling pathway;GO:0042742|defense response to bacterium;GO:0010150|leaf senescence;GO:0034757|negative regulation of iron ion transport;GO:0009116|nucleoside metabolic pro…	GO:0009884|cytokinin receptor activity;GO:0000155|phosphorelay sensor kinase activity;GO:0004673|protein histidine kinase activity;GO:0043424|protein histidine kinase bindingGO:0000155|phosphorelay sensor kinase activity	GO:0005789|endoplasmic reticulum membrane;GO:0016021|integral component of membrane;GO:0005886|plasma membrane	K14489|AHK2_3_4; arabidopsis histidine kinase 2/3/4 (cytokinin receptor) [EC:2.7.13.3]	map04075|Plant hormone signal transduction
f2p60_752_33135	gi|118486698|gb|EF147156.1|	1197	E:0	Populus trichocarpa clone WS01228_H12 unknown mRNA	gi|224140409|ref|XP_002323575.1|	293	E:6e-96	chlorophyll a/b binding protein CP29 [Populus trichocarpa]	CB4A_ARATH	269	E:8e-88	RecName: Full=Chlorophyll a-b binding protein CP29.1, chloroplastic;^Eukaryota; Viridiplantae; Streptophyta; Embryophyta; Tracheophyta; Spermatophyta; Magnoliophyta; eudicotyledons; Gunneridae; Pentapetalae; rosids; malvids; Brassicales; Brassicaceae; Camelineae; Arabidopsis	CB4A_ARATH	293	E:1e-98	RecName: Full=Chlorophyll a-b binding protein CP29.1, chloroplastic;^Eukaryota; Viridiplantae; Streptophyta; Embryophyta; Tracheophyta; Spermatophyta; Magnoliophyta; eudicotyledons; Gunneridae; Pentapetalae; rosids; malvids; Brassicales; Brassicaceae; Camelineae; Arabidopsis	PF00504.20	Chloroa_b-bind	Chlorophyll A-B binding protein	ENOG410YYUX	Chlorophyll A-B binding protein	.	ExpAA=55.42^PredHel=2^Topology=i30-52o67-89i	.	GO:0009768|photosynthesis, light harvesting in photosystem I;GO:0018298|protein-chromophore linkage;GO:0009637|response to blue light;GO:0010218|response to far red light;GO:0010114|response to red light	GO:0016168|chlorophyll binding;GO:0046872|metal ion binding;GO:0031409|pigment binding;GO:0019904|protein domain specific binding	GO:0009507|chloroplast;GO:0009941|chloroplast envelope;GO:0009534|chloroplast thylakoid;GO:0009535|chloroplast thylakoid membrane;GO:0016021|integral component of membrane;GO:0016020|membrane;GO:0009522|photosystem I;GO:0009523|photosystem II;GO:0010287|plastoglobule;GO:0009579|thylakoid	K08915|LHCB4; light-harvesting complex II chlorophyll a/b binding protein 4	map00196|Photosynthesis - antenna proteins;map01100|Metabolic pathways
f2p60_2188_21289	gi|118483702|gb|EF145601.1|	3419	E:0	Populus trichocarpa clone WS01126_N03 unknown mRNA	gi|224061851|ref|XP_002300630.1|	1147	E:0	ribophorin 1 family protein [Populus trichocarpa]	OST1A_ARATH	799	E:0	RecName: Full=Dolichyl-diphosphooligosaccharide--protein glycosyltransferase subunit 1A;^Eukaryota; Viridiplantae; Streptophyta; Embryophyta; Tracheophyta; Spermatophyta; Magnoliophyta; eudicotyledons; Gunneridae; Pentapetalae; rosids; malvids; Brassicales; Brassicaceae; Camelineae; Arabidopsis	OST1A_ARATH	770	E:0	RecName: Full=Dolichyl-diphosphooligosaccharide--protein glycosyltransferase subunit 1A;^Eukaryota; Viridiplantae; Streptophyta; Embryophyta; Tracheophyta; Spermatophyta; Magnoliophyta; eudicotyledons; Gunneridae; Pentapetalae; rosids; malvids; Brassicales; Brassicaceae; Camelineae; Arabidopsis	PF04597.13	Ribophorin_I	Ribophorin I	ENOG410XQVZ	ribophorin I	.	ExpAA=20.12^PredHel=1^Topology=o334-353i	.	GO:0018279|protein N-linked glycosylation via asparagineGO:0006486|protein glycosylation	GO:0004579|dolichyl-diphosphooligosaccharide-protein glycotransferase activityGO:0004579|dolichyl-diphosphooligosaccharide-protein glycotransferase activity	GO:0005783|endoplasmic reticulum;GO:0016021|integral component of membrane;GO:0016020|membrane;GO:0008250|oligosaccharyltransferase complexGO:0005783|endoplasmic reticulum;GO:0016021|integral component of membrane	K12666|OST1, RPN1; oligosaccharyltransferase complex subunit alpha (ribophorin I)	map04141|Protein processing in endoplasmic reticulum;map00513|Various types of N-glycan biosynthesis;map01100|Metabolic pathways;map00510|N-Glycan biosynthesis
f2p60_1212_27752	gi|566194798|ref|XM_006377658.1|	2034	E:0	Populus trichocarpa ER lumen protein retaining receptor (POPTR_0011s10540g) mRNA, complete cds	gi|743897247|ref|XP_011041910.1|	435	E:2e-150	PREDICTED: ER lumen protein-retaining receptor [Populus euphratica]	ERD2B_ARATH	382	E:6e-131	RecName: Full=ER lumen protein-retaining receptor B;^Eukaryota; Viridiplantae; Streptophyta; Embryophyta; Tracheophyta; Spermatophyta; Magnoliophyta; eudicotyledons; Gunneridae; Pentapetalae; rosids; malvids; Brassicales; Brassicaceae; Camelineae; Arabidopsis	ERD2B_ARATH	382	E:5e-134	RecName: Full=ER lumen protein-retaining receptor B;^Eukaryota; Viridiplantae; Streptophyta; Embryophyta; Tracheophyta; Spermatophyta; Magnoliophyta; eudicotyledons; Gunneridae; Pentapetalae; rosids; malvids; Brassicales; Brassicaceae; Camelineae; Arabidopsis	PF00810.17	ER_lumen_recept	ER lumen protein retaining receptor	COG5196	Required for the retention of luminal endoplasmic reticulum proteins. Determines the specificity of the luminal ER protein retention system. Also required for normal vesicular traffic through the Golgi (By similarity)	.	ExpAA=116.45^PredHel=6^Topology=i13-32o52-74i95-112o118-140i153-170o180-202i	.	GO:0010204|defense response signaling pathway, resistance gene-independent;GO:0006621|protein retention in ER lumen;GO:0015031|protein transport;GO:0016192|vesicle-mediated transportGO:0006621|protein retention in ER lumen	GO:0046923|ER retention sequence bindingGO:0046923|ER retention sequence binding	GO:0005789|endoplasmic reticulum membrane;GO:0005794|Golgi apparatus;GO:0000139|Golgi membrane;GO:0016021|integral component of membraneGO:0016021|integral component of membrane	K10949|KDELR; ER lumen protein retaining receptor	map05110|Vibrio cholerae infection
f3p60_3090_19137	gi|566187641|ref|XM_002312988.2|	5505	E:0	Populus trichocarpa vacuolar proton ATPase family protein (POPTR_0009s12430g) mRNA, complete cds	gi|566187642|ref|XP_002313024.2|	1590	E:0	vacuolar proton ATPase family protein [Populus trichocarpa]	VHAA3_ARATH	1296	E:0	RecName: Full=V-type proton ATPase subunit a3;^Eukaryota; Viridiplantae; Streptophyta; Embryophyta; Tracheophyta; Spermatophyta; Magnoliophyta; eudicotyledons; Gunneridae; Pentapetalae; rosids; malvids; Brassicales; Brassicaceae; Camelineae; Arabidopsis	VHAA3_ARATH	1347	E:0	RecName: Full=V-type proton ATPase subunit a3;^Eukaryota; Viridiplantae; Streptophyta; Embryophyta; Tracheophyta; Spermatophyta; Magnoliophyta; eudicotyledons; Gunneridae; Pentapetalae; rosids; malvids; Brassicales; Brassicaceae; Camelineae; Arabidopsis	PF01496.18	V_ATPase_I	V-type ATPase 116kDa subunit family	COG1269	ATPase 116 kDa subunit	.	ExpAA=138.47^PredHel=6^Topology=o427-449i469-491o551-573i580-602o641-663i757-779o	.	GO:0015991|ATP hydrolysis coupled proton transport;GO:0015986|ATP synthesis coupled proton transport;GO:0032119|sequestering of zinc ion;GO:0007035|vacuolar acidification;GO:0070072|vacuolar proton-transporting V-type ATPase complex assembly;GO:0043181|vacuolar sequesteringGO:0015991|ATP hydrolysis coupled proton transport	GO:0051117|ATPase binding;GO:0009678|hydrogen-translocating pyrophosphatase activity;GO:0045735|nutrient reservoir activity;GO:0046961|proton-transporting ATPase activity, rotational mechanismGO:0015078|hydrogen ion transmembrane transporter activity	GO:0009507|chloroplast;GO:0009941|chloroplast envelope;GO:0005794|Golgi apparatus;GO:0016021|integral component of membrane;GO:0016020|membrane;GO:0000325|plant-type vacuole;GO:0009705|plant-type vacuole membrane;GO:0005886|plasma membrane;GO:0005774|vacuolar membrane;GO:0016471|vacuolar proton-transporting V-type ATPase complex;GO:0000220|vacuolar proton-transporting V-type ATPase, V0 domain;GO:…	K02154|ATPeV0A, ATP6N; V-type H+-transporting ATPase subunit a	map05110|Vibrio cholerae infection;map04142|Lysosome;map04145|Phagosome;map05120|Epithelial cell signaling in Helicobacter pylori infection;map05152|Tuberculosis;map04721|Synaptic vesicle cycle;map05323|Rheumatoid arthritis;map04966|Collecting duct acid secretion;map01100|Metabolic pathways;map00190|Oxidative phosphorylation
f2p14_3240_18921	gi|743853934|ref|XM_011031354.1|	5600	E:0	PREDICTED: Populus euphratica lipoxygenase 6, chloroplastic-like (LOC105129345), mRNA	gi|224100047|ref|XP_002311724.1|	1830	E:0	lipoxygenase family protein [Populus trichocarpa]	LOX6_ARATH	1155	E:0	RecName: Full=Lipoxygenase 6, chloroplastic;^Eukaryota; Viridiplantae; Streptophyta; Embryophyta; Tracheophyta; Spermatophyta; Magnoliophyta; eudicotyledons; Gunneridae; Pentapetalae; rosids; malvids; Brassicales; Brassicaceae; Camelineae; Arabidopsis	LOX6_ARATH	1197	E:0	RecName: Full=Lipoxygenase 6, chloroplastic;^Eukaryota; Viridiplantae; Streptophyta; Embryophyta; Tracheophyta; Spermatophyta; Magnoliophyta; eudicotyledons; Gunneridae; Pentapetalae; rosids; malvids; Brassicales; Brassicaceae; Camelineae; Arabidopsis	PF01477.22	PLAT	PLAT/LH2 domain	ENOG410YN4N	Plant lipoxygenase may be involved in a number of diverse aspects of plant physiology including growth and development, pest resistance, and senescence or responses to wounding (By similarity)	.	ExpAA=18.74^PredHel=1^Topology=i41-63o	.	GO:0009695|jasmonic acid biosynthetic process;GO:0034440|lipid oxidation;GO:0031408|oxylipin biosynthetic process;GO:0009611|response to woundingGO:0055114|oxidation-reduction process	GO:0016165|linoleate 13S-lipoxygenase activity;GO:0046872|metal ion bindingGO:0005515|protein binding;GO:0016702|oxidoreductase activity, acting on single donors with incorporation of molecular oxygen, incorporation of two atoms of oxygen;GO:0046872|metal ion binding	GO:0009507|chloroplast;GO:0005886|plasma membrane	K00454|LOX2S; lipoxygenase [EC:1.13.11.12]	map00592|alpha-Linolenic acid metabolism;map01100|Metabolic pathways;map00591|Linoleic acid metabolism;map01110|Biosynthesis of secondary metabolites
f2p60_2744_2157	gi|566214977|ref|XM_002324983.2|	4848	E:0	Populus trichocarpa hypothetical protein (POPTR_0018s09300g) mRNA, complete cds	gi|566214978|ref|XP_002325019.2|	1335	E:0	hypothetical protein POPTR_0018s09300g [Populus trichocarpa]	STT3A_ARATH	1162	E:0	RecName: Full=Dolichyl-diphosphooligosaccharide--protein glycosyltransferase subunit STT3A;^Eukaryota; Viridiplantae; Streptophyta; Embryophyta; Tracheophyta; Spermatophyta; Magnoliophyta; eudicotyledons; Gunneridae; Pentapetalae; rosids; malvids; Brassicales; Brassicaceae; Camelineae; Arabidopsis	STT3A_ARATH	1348	E:0	RecName: Full=Dolichyl-diphosphooligosaccharide--protein glycosyltransferase subunit STT3A;^Eukaryota; Viridiplantae; Streptophyta; Embryophyta; Tracheophyta; Spermatophyta; Magnoliophyta; eudicotyledons; Gunneridae; Pentapetalae; rosids; malvids; Brassicales; Brassicaceae; Camelineae; Arabidopsis	PF02516.13	STT3	Oligosaccharyl transferase STT3 subunit	COG1287	oligosaccharyl transferase STT3 subunit	.	ExpAA=277.76^PredHel=13^Topology=i58-80o122-144i151-173o183-205i212-234o249-271i278-300o310-327i340-362o404-426i431-448o452-474i545-567o	.	GO:0043687|post-translational protein modification;GO:0018279|protein N-linked glycosylation via asparagine;GO:0047484|regulation of response to osmotic stress;GO:0009651|response to salt stressGO:0006486|protein glycosylation	GO:0004579|dolichyl-diphosphooligosaccharide-protein glycotransferase activityGO:0004576|oligosaccharyl transferase activity	GO:0005783|endoplasmic reticulum;GO:0016021|integral component of membrane;GO:0016020|membrane;GO:0008250|oligosaccharyltransferase complex;GO:0005886|plasma membraneGO:0016020|membrane	K07151|STT3; dolichyl-diphosphooligosaccharide--protein glycosyltransferase [EC:2.4.99.18]	map04141|Protein processing in endoplasmic reticulum;map00513|Various types of N-glycan biosynthesis;map01100|Metabolic pathways;map00510|N-Glycan biosynthesis
f2p60_751_331522	gi|566214249|ref|XM_002324123.2|	1251	E:0	Populus trichocarpa signal peptidase family protein (POPTR_0018s04790g) mRNA, complete cds	gi|743934456|ref|XP_011011565.1|	290	E:2e-96	PREDICTED: signal peptidase complex subunit 3B-like [Populus euphratica]	SPC3B_ARATH	254	E:9e-84	RecName: Full=Signal peptidase complex subunit 3B;^Eukaryota; Viridiplantae; Streptophyta; Embryophyta; Tracheophyta; Spermatophyta; Magnoliophyta; eudicotyledons; Gunneridae; Pentapetalae; rosids; malvids; Brassicales; Brassicaceae; Camelineae; Arabidopsis	SPC3B_ARATH	300	E:6e-103	RecName: Full=Signal peptidase complex subunit 3B;^Eukaryota; Viridiplantae; Streptophyta; Embryophyta; Tracheophyta; Spermatophyta; Magnoliophyta; eudicotyledons; Gunneridae; Pentapetalae; rosids; malvids; Brassicales; Brassicaceae; Camelineae; Arabidopsis	PF04573.11	SPC22	Signal peptidase subunit	ENOG4110TZP	signal peptidase	.	ExpAA=21.84^PredHel=1^Topology=i27-49o	.	GO:0045047|protein targeting to ER;GO:0006465|signal peptide processingGO:0006465|signal peptide processing	GO:0008233|peptidase activityGO:0008233|peptidase activity	GO:0005618|cell wall;GO:0016021|integral component of membrane;GO:0031090|organelle membrane;GO:0005787|signal peptidase complexGO:0005787|signal peptidase complex;GO:0016021|integral component of membrane	K12948|SPCS3, SPC3; signal peptidase complex subunit 3 [EC:3.4.-.-]	map03060|Protein export
f2p60_1080_29112	gi|566166118|ref|XM_002306016.2|	1875	E:0	Populus trichocarpa hypothetical protein (POPTR_0004s11470g) mRNA, complete cds	gi|743932031|ref|XP_011010301.1|	416	E:1e-143	PREDICTED: vesicle transport v-SNARE 13-like [Populus euphratica]	VTI13_ARATH	329	E:1e-110	RecName: Full=Vesicle transport v-SNARE 13;^Eukaryota; Viridiplantae; Streptophyta; Embryophyta; Tracheophyta; Spermatophyta; Magnoliophyta; eudicotyledons; Gunneridae; Pentapetalae; rosids; malvids; Brassicales; Brassicaceae; Camelineae; Arabidopsis	VTI13_ARATH	355	E:3e-123	RecName: Full=Vesicle transport v-SNARE 13;^Eukaryota; Viridiplantae; Streptophyta; Embryophyta; Tracheophyta; Spermatophyta; Magnoliophyta; eudicotyledons; Gunneridae; Pentapetalae; rosids; malvids; Brassicales; Brassicaceae; Camelineae; Arabidopsis	PF05008.14	V-SNARE	Vesicle transport v-SNARE protein N-terminus	ENOG4111J90	vesicle transport through interaction with t-SNAREs	.	ExpAA=19.81^PredHel=1^Topology=i198-217o	.	GO:0006888|ER to Golgi vesicle-mediated transport;GO:0006896|Golgi to vacuole transport;GO:0006623|protein targeting to vacuole;GO:0042147|retrograde transport, endosome to Golgi;GO:0048280|vesicle fusion with Golgi apparatusGO:0006886|intracellular protein transport	GO:0005484|SNAP receptor activity	GO:0005829|cytosol;GO:0005789|endoplasmic reticulum membrane;GO:0012507|ER to Golgi transport vesicle membrane;GO:0005794|Golgi apparatus;GO:0016021|integral component of membrane;GO:0031902|late endosome membrane;GO:0031201|SNARE complexGO:0016020|membrane	K08493|VTI1; vesicle transport through interaction with t-SNAREs 1	map04130|SNARE interactions in vesicular transport
f2p60_2041_4121	gi|566189269|ref|XM_002315629.2|	3260	E:0	Populus trichocarpa hypothetical protein (POPTR_0010s05700g) mRNA, complete cds	gi|566189270|ref|XP_002315665.2|	815	E:0	hypothetical protein POPTR_0010s05700g [Populus trichocarpa]	MGAT3_RAT	80.1	E:2e-14	RecName: Full=Beta-1,4-mannosyl-glycoprotein 4-beta-N-acetylglucosaminyltransferase;^Eukaryota; Metazoa; Chordata; Craniata; Vertebrata; Euteleostomi; Mammalia; Eutheria; Euarchontoglires; Glires; Rodentia; Myomorpha; Muroidea; Muridae; Murinae; Rattus	MGAT3_RAT	80.1	E:5e-15	RecName: Full=Beta-1,4-mannosyl-glycoprotein 4-beta-N-acetylglucosaminyltransferase;^Eukaryota; Metazoa; Chordata; Craniata; Vertebrata; Euteleostomi; Mammalia; Eutheria; Euarchontoglires; Glires; Rodentia; Myomorpha; Muroidea; Muridae; Murinae; Rattus	PF04724.12	Glyco_transf_17	Glycosyltransferase family 17	ENOG410YQKP	Glycosyl transferase family 17 protein	.	ExpAA=19.84^PredHel=1^Topology=i49-66o	.	GO:0006487|protein N-linked glycosylationGO:0006487|protein N-linked glycosylation	GO:0003830|beta-1,4-mannosylglycoprotein 4-beta-N-acetylglucosaminyltransferase activityGO:0003830|beta-1,4-mannosylglycoprotein 4-beta-N-acetylglucosaminyltransferase activity	GO:0000139|Golgi membrane;GO:0016021|integral component of membraneGO:0016020|membrane	K00737|MGAT3; beta-1,4-mannosyl-glycoprotein beta-1,4-N-acetylglucosaminyltransferase [EC:2.4.1.144]	map01100|Metabolic pathways;map00510|N-Glycan biosynthesis;map04075|Plant hormone signal transduction
f4p60_1664_24017	gi|566175522|ref|XM_002308191.2|	2837	E:0	Populus trichocarpa chlorophyll synthetase family protein (POPTR_0006s10300g) mRNA, complete cds	gi|224087768|ref|XP_002308227.1|	645	E:0	chlorophyll synthetase family protein [Populus trichocarpa]	CHLG_ARATH	545	E:0	RecName: Full=Chlorophyll synthase, chloroplastic;^Eukaryota; Viridiplantae; Streptophyta; Embryophyta; Tracheophyta; Spermatophyta; Magnoliophyta; eudicotyledons; Gunneridae; Pentapetalae; rosids; malvids; Brassicales; Brassicaceae; Camelineae; Arabidopsis	CHLG_ARATH	590	E:0	RecName: Full=Chlorophyll synthase, chloroplastic;^Eukaryota; Viridiplantae; Streptophyta; Embryophyta; Tracheophyta; Spermatophyta; Magnoliophyta; eudicotyledons; Gunneridae; Pentapetalae; rosids; malvids; Brassicales; Brassicaceae; Camelineae; Arabidopsis	PF01040.17	UbiA	UbiA prenyltransferase family	COG0382	Synthesis of 3-octaprenyl-4-hydroxybenzoate (By similarity)	.	ExpAA=133.16^PredHel=5^Topology=o168-190i195-212o222-244i251-268o319-341i	.	GO:0015995|chlorophyll biosynthetic process	GO:0046408|chlorophyll synthetase activityGO:0016765|transferase activity, transferring alkyl or aryl (other than methyl) groups	GO:0009507|chloroplast;GO:0031969|chloroplast membrane;GO:0009534|chloroplast thylakoid;GO:0016021|integral component of membraneGO:0016021|integral component of membrane	K04040|chlG, bchG; chlorophyll synthase [EC:2.5.1.62]	map00860|Porphyrin and chlorophyll metabolism;map01100|Metabolic pathways;map01110|Biosynthesis of secondary metabolites
f3p60_1268_27188	gi|566211809|ref|XM_006372895.1|	2150	E:0	Populus trichocarpa hypothetical protein (POPTR_0017s06550g) mRNA, complete cds	gi|566211810|ref|XP_006372957.1|	637	E:0	hypothetical protein POPTR_0017s06550g [Populus trichocarpa]	PER3_ARATH	488	E:1e-170	RecName: Full=Peroxidase 3;^Eukaryota; Viridiplantae; Streptophyta; Embryophyta; Tracheophyta; Spermatophyta; Magnoliophyta; eudicotyledons; Gunneridae; Pentapetalae; rosids; malvids; Brassicales; Brassicaceae; Camelineae; Arabidopsis	PER3_ARATH	490	E:5e-173	RecName: Full=Peroxidase 3;^Eukaryota; Viridiplantae; Streptophyta; Embryophyta; Tracheophyta; Spermatophyta; Magnoliophyta; eudicotyledons; Gunneridae; Pentapetalae; rosids; malvids; Brassicales; Brassicaceae; Camelineae; Arabidopsis	PF00141.22	peroxidase	Peroxidase	ENOG410Y9ME	peroxidase	.	ExpAA=18.20^PredHel=1^Topology=i3-20o	.	GO:0042744|hydrogen peroxide catabolic process;GO:0042538|hyperosmotic salinity response;GO:0009664|plant-type cell wall organization;GO:0009409|response to cold;GO:0009269|response to desiccation;GO:0006979|response to oxidative stressGO:0006979|response to oxidative stress;GO:0055114|oxidation-reduction process	GO:0020037|heme binding;GO:0046872|metal ion binding;GO:0004601|peroxidase activityGO:0004601|peroxidase activity;GO:0020037|heme binding	GO:0005783|endoplasmic reticulum;GO:0005576|extracellular region;GO:0009505|plant-type cell wall;GO:0009506|plasmodesma	K00430|E1.11.1.7; peroxidase [EC:1.11.1.7]	map01100|Metabolic pathways;map00940|Phenylpropanoid biosynthesis;map01110|Biosynthesis of secondary metabolites
f2p22_2660_19949	gi|566156087|ref|XM_002300735.2|	4645	E:0	Populus trichocarpa ribophorin 2 family protein (POPTR_0002s03790g) mRNA, complete cds	gi|224062133|ref|XP_002300771.1|	1236	E:0	ribophorin 2 family protein [Populus trichocarpa]	RPN2_ARATH	803	E:0	RecName: Full=Dolichyl-diphosphooligosaccharide--protein glycosyltransferase subunit 2;^Eukaryota; Viridiplantae; Streptophyta; Embryophyta; Tracheophyta; Spermatophyta; Magnoliophyta; eudicotyledons; Gunneridae; Pentapetalae; rosids; malvids; Brassicales; Brassicaceae; Camelineae; Arabidopsis	RPN2_ARATH	888	E:0	RecName: Full=Dolichyl-diphosphooligosaccharide--protein glycosyltransferase subunit 2;^Eukaryota; Viridiplantae; Streptophyta; Embryophyta; Tracheophyta; Spermatophyta; Magnoliophyta; eudicotyledons; Gunneridae; Pentapetalae; rosids; malvids; Brassicales; Brassicaceae; Camelineae; Arabidopsis	PF05817.13	Ribophorin_II	Oligosaccharyltransferase subunit Ribophorin II	ENOG410XRF2	ribophorin II	.	ExpAA=89.53^PredHel=4^Topology=i7-29o599-621i633-655o665-687i	.	GO:0006487|protein N-linked glycosylation;GO:0009409|response to coldGO:0006487|protein N-linked glycosylation	GO:0016757|transferase activity, transferring glycosyl groups	GO:0005783|endoplasmic reticulum;GO:0005794|Golgi apparatus;GO:0016021|integral component of membrane;GO:0016020|membrane;GO:0005739|mitochondrion;GO:0008250|oligosaccharyltransferase complex;GO:0009505|plant-type cell wall;GO:0005886|plasma membrane;GO:0009506|plasmodesma;GO:0005774|vacuolar membraneGO:0008250|oligosaccharyltransferase complex;GO:0016021|integral component of membrane	K12667|SWP1, RPN2; oligosaccharyltransferase complex subunit delta (ribophorin II)	map04141|Protein processing in endoplasmic reticulum;map00513|Various types of N-glycan biosynthesis;map01100|Metabolic pathways;map00510|N-Glycan biosynthesis
f3p28_3480_18620	gi|566212791|ref|XM_002323811.2|	6296	E:0	Populus trichocarpa multidrug resistance P-glycoprotein (POPTR_0017s11750g) mRNA, complete cds	gi|224140965|ref|XP_002323847.1|	2029	E:0	multidrug resistance P-glycoprotein [Populus trichocarpa]	AB19B_ARATH	1816	E:0	RecName: Full=ABC transporter B family member 19;^Eukaryota; Viridiplantae; Streptophyta; Embryophyta; Tracheophyta; Spermatophyta; Magnoliophyta; eudicotyledons; Gunneridae; Pentapetalae; rosids; malvids; Brassicales; Brassicaceae; Camelineae; Arabidopsis	AB19B_ARATH	1959	E:0	RecName: Full=ABC transporter B family member 19;^Eukaryota; Viridiplantae; Streptophyta; Embryophyta; Tracheophyta; Spermatophyta; Magnoliophyta; eudicotyledons; Gunneridae; Pentapetalae; rosids; malvids; Brassicales; Brassicaceae; Camelineae; Arabidopsis	PF00664.22	ABC_membrane	ABC transporter transmembrane region	COG1132	(ABC) transporter	.	ExpAA=161.88^PredHel=6^Topology=o10-32i90-112o516-538i551-573o644-666i735-757o	.	GO:0010541|acropetal auxin transport;GO:0043481|anthocyanin accumulation in tissues in response to UV light;GO:0009926|auxin polar transport;GO:0060918|auxin transport;GO:0009734|auxin-activated signaling pathway;GO:0010540|basipetal auxin transport;GO:0090691|formation of plant organ boundary;GO:0048527|lateral root development;GO:0009640|photomorphogenesis;GO:0009958|positive gravitropism;GO:00…	GO:0005524|ATP binding;GO:0042626|ATPase activity, coupled to transmembrane movement of substances;GO:0010329|auxin efflux transmembrane transporter activityGO:0005524|ATP binding;GO:0042626|ATPase activity, coupled to transmembrane movement of substances;GO:0016887|ATPase activity	GO:0016021|integral component of membrane;GO:0005886|plasma membraneGO:0016021|integral component of membrane	K05658|ABCB1; ATP-binding cassette, subfamily B (MDR/TAP), member 1 [EC:3.6.3.44]	map02010|ABC transporters;map05206|MicroRNAs in cancer;map04976|Bile secretion
f2p60_1350_26454	gi|566215129|ref|XM_002325025.2|	2290	E:0	Populus trichocarpa VDAC3.1 family protein (POPTR_0018s10180g) mRNA, complete cds	gi|224143751|ref|XP_002325061.1|	367	E:7e-152	VDAC3.1 family protein [Populus trichocarpa]	VDAC4_ARATH	252	E:1e-101	RecName: Full=Mitochondrial outer membrane protein porin 4;^Eukaryota; Viridiplantae; Streptophyta; Embryophyta; Tracheophyta; Spermatophyta; Magnoliophyta; eudicotyledons; Gunneridae; Pentapetalae; rosids; malvids; Brassicales; Brassicaceae; Camelineae; Arabidopsis	VDAC4_ARATH	140	E:3e-39	RecName: Full=Mitochondrial outer membrane protein porin 4;^Eukaryota; Viridiplantae; Streptophyta; Embryophyta; Tracheophyta; Spermatophyta; Magnoliophyta; eudicotyledons; Gunneridae; Pentapetalae; rosids; malvids; Brassicales; Brassicaceae; Camelineae; Arabidopsis	PF01459.21	Porin_3	Eukaryotic porin	ENOG410ZBK1	voltage-dependent anion channel	.	ExpAA=46.16^PredHel=2^Topology=i107-129o139-161i	.	GO:0040008|regulation of growth;GO:0009617|response to bacteriumGO:0055085|transmembrane transport	GO:0015288|porin activity;GO:0008308|voltage-gated anion channel activity	GO:0016020|membrane;GO:0005741|mitochondrial outer membrane;GO:0005739|mitochondrion;GO:0005886|plasma membrane;GO:0046930|pore complexGO:0005741|mitochondrial outer membrane	K15040|VDAC2; voltage-dependent anion channel protein 2	map04022|cGMP-PKG signaling pathway;map04020|Calcium signaling pathway;map05016|Huntington's disease;map05166|HTLV-I infection;map05012|Parkinson's disease
f6p60_902_31195	gi|566169292|ref|XM_006382557.1|	1563	E:0	Populus trichocarpa signal peptidase family protein (POPTR_0005s03830g) mRNA, complete cds	gi|566169293|ref|XP_006382619.1|	284	E:1e-93	signal peptidase family protein [Populus trichocarpa]	SPC3B_ARATH	246	E:7e-80	RecName: Full=Signal peptidase complex subunit 3B;^Eukaryota; Viridiplantae; Streptophyta; Embryophyta; Tracheophyta; Spermatophyta; Magnoliophyta; eudicotyledons; Gunneridae; Pentapetalae; rosids; malvids; Brassicales; Brassicaceae; Camelineae; Arabidopsis	SPC3B_ARATH	295	E:2e-101	RecName: Full=Signal peptidase complex subunit 3B;^Eukaryota; Viridiplantae; Streptophyta; Embryophyta; Tracheophyta; Spermatophyta; Magnoliophyta; eudicotyledons; Gunneridae; Pentapetalae; rosids; malvids; Brassicales; Brassicaceae; Camelineae; Arabidopsis	PF04573.11	SPC22	Signal peptidase subunit	ENOG4110TZP	signal peptidase	.	ExpAA=20.41^PredHel=1^Topology=i7-29o	.	GO:0045047|protein targeting to ER;GO:0006465|signal peptide processingGO:0006465|signal peptide processing	GO:0008233|peptidase activityGO:0008233|peptidase activity	GO:0005618|cell wall;GO:0016021|integral component of membrane;GO:0031090|organelle membrane;GO:0005787|signal peptidase complexGO:0005787|signal peptidase complex;GO:0016021|integral component of membrane	K12948|SPCS3, SPC3; signal peptidase complex subunit 3 [EC:3.4.-.-]	map03060|Protein export
f3p56_4281_283	gi|743930963|ref|XM_011011442.1|	7136	E:0	PREDICTED: Populus euphratica putative phospholipid-transporting ATPase 4 (LOC105114776), transcript variant X1, mRNA	gi|566160775|ref|XP_006385412.1|	2447	E:0	putative phospholipid-transporting ATPase 5 family protein [Populus trichocarpa]	ALA4_ARATH	1892	E:0	RecName: Full=Probable phospholipid-transporting ATPase 4 {ECO:0000303|PubMed:11402198};^Eukaryota; Viridiplantae; Streptophyta; Embryophyta; Tracheophyta; Spermatophyta; Magnoliophyta; eudicotyledons; Gunneridae; Pentapetalae; rosids; malvids; Brassicales; Brassicaceae; Camelineae; Arabidopsis	ALA4_ARATH	1935	E:0	RecName: Full=Probable phospholipid-transporting ATPase 4 {ECO:0000303|PubMed:11402198};^Eukaryota; Viridiplantae; Streptophyta; Embryophyta; Tracheophyta; Spermatophyta; Magnoliophyta; eudicotyledons; Gunneridae; Pentapetalae; rosids; malvids; Brassicales; Brassicaceae; Camelineae; Arabidopsis	PF16209.4	PhoLip_ATPase_N	Phospholipid-translocating ATPase N-terminal	ENOG410XPYK	Phospholipid-transporting atpase	.	ExpAA=213.60^PredHel=10^Topology=i85-104o109-126i304-326o357-379i941-963o973-992i1022-1044o1059-1078i1091-1113o1128-1150i	.	GO:0048194|Golgi vesicle budding	GO:0005524|ATP binding;GO:0000287|magnesium ion binding;GO:0004012|phospholipid-translocating ATPase activity	GO:0000139|Golgi membrane;GO:0016021|integral component of membrane;GO:0005886|plasma membrane;GO:0005802|trans-Golgi network	K01530|E3.6.3.1; phospholipid-translocating ATPase [EC:3.6.3.1]	map04742|Taste transduction;map00230|Purine metabolism
f2p41_837_12740	gi|566151894|ref|XM_002298716.2|	1299	E:0	Populus trichocarpa 5-methylthioribose kinase family protein (POPTR_0001s30710g) mRNA, complete cds	gi|224056200|ref|XP_002298752.1|	384	E:2e-129	5-methylthioribose kinase family protein [Populus trichocarpa]	MTK2_ORYSJ	298	E:5e-97	RecName: Full=Methylthioribose kinase 2;^Eukaryota; Viridiplantae; Streptophyta; Embryophyta; Tracheophyta; Spermatophyta; Magnoliophyta; Liliopsida; Poales; Poaceae; BOP clade; Oryzoideae; Oryzeae; Oryzinae; Oryza	MTK_ARATH	298	E:2e-97	RecName: Full=Methylthioribose kinase;^Eukaryota; Viridiplantae; Streptophyta; Embryophyta; Tracheophyta; Spermatophyta; Magnoliophyta; eudicotyledons; Gunneridae; Pentapetalae; rosids; malvids; Brassicales; Brassicaceae; Camelineae; Arabidopsis	PF01636.22	APH	Phosphotransferase enzyme family	COG4857	Catalyzes the phosphorylation of methylthioribose into methylthioribose-1-phosphate (By similarity)	.	ExpAA=33.71^PredHel=1^Topology=o30-52i	.	GO:0071369|cellular response to ethylene stimulus;GO:0071281|cellular response to iron ion;GO:0071732|cellular response to nitric oxide;GO:0019509|L-methionine salvage from methylthioadenosine	GO:0005524|ATP binding;GO:0042802|identical protein binding;GO:0046522|S-methyl-5-thioribose kinase activity	GO:0005829|cytosol	K00899|mtnK; 5-methylthioribose kinase [EC:2.7.1.100]	map01100|Metabolic pathways;map00270|Cysteine and methionine metabolism
f3p60_673_34125	gi|566166119|ref|XM_006384229.1|	1109	E:0	Populus trichocarpa hypothetical protein (POPTR_0004s11470g) mRNA, complete cds	gi|743932031|ref|XP_011010301.1|	302	E:7e-101	PREDICTED: vesicle transport v-SNARE 13-like [Populus euphratica]	VTI13_ARATH	246	E:3e-80	RecName: Full=Vesicle transport v-SNARE 13;^Eukaryota; Viridiplantae; Streptophyta; Embryophyta; Tracheophyta; Spermatophyta; Magnoliophyta; eudicotyledons; Gunneridae; Pentapetalae; rosids; malvids; Brassicales; Brassicaceae; Camelineae; Arabidopsis	VTI13_ARATH	273	E:1e-91	RecName: Full=Vesicle transport v-SNARE 13;^Eukaryota; Viridiplantae; Streptophyta; Embryophyta; Tracheophyta; Spermatophyta; Magnoliophyta; eudicotyledons; Gunneridae; Pentapetalae; rosids; malvids; Brassicales; Brassicaceae; Camelineae; Arabidopsis	PF05008.14	V-SNARE	Vesicle transport v-SNARE protein N-terminus	ENOG4111J90	vesicle transport through interaction with t-SNAREs	.	ExpAA=19.79^PredHel=1^Topology=i144-163o	.	GO:0006888|ER to Golgi vesicle-mediated transport;GO:0006896|Golgi to vacuole transport;GO:0006623|protein targeting to vacuole;GO:0042147|retrograde transport, endosome to Golgi;GO:0048280|vesicle fusion with Golgi apparatusGO:0006886|intracellular protein transport	GO:0005484|SNAP receptor activity	GO:0005829|cytosol;GO:0005789|endoplasmic reticulum membrane;GO:0012507|ER to Golgi transport vesicle membrane;GO:0005794|Golgi apparatus;GO:0016021|integral component of membrane;GO:0031902|late endosome membrane;GO:0031201|SNARE complexGO:0016020|membrane	K08493|VTI1; vesicle transport through interaction with t-SNAREs 1	map04130|SNARE interactions in vesicular transport
f2p60_2358_20757	gi|743895066|ref|XM_011042496.1|	4074	E:0	PREDICTED: Populus euphratica probable galacturonosyltransferase 3 (LOC105136972), transcript variant X1, mRNA	gi|743895067|ref|XP_011040798.1|	1362	E:0	PREDICTED: probable galacturonosyltransferase 3 isoform X1 [Populus euphratica]	GAUT3_ARATH	881	E:0	RecName: Full=Probable galacturonosyltransferase 3;^Eukaryota; Viridiplantae; Streptophyta; Embryophyta; Tracheophyta; Spermatophyta; Magnoliophyta; eudicotyledons; Gunneridae; Pentapetalae; rosids; malvids; Brassicales; Brassicaceae; Camelineae; Arabidopsis	GAUT3_ARATH	908	E:0	RecName: Full=Probable galacturonosyltransferase 3;^Eukaryota; Viridiplantae; Streptophyta; Embryophyta; Tracheophyta; Spermatophyta; Magnoliophyta; eudicotyledons; Gunneridae; Pentapetalae; rosids; malvids; Brassicales; Brassicaceae; Camelineae; Arabidopsis	PF01501.19	Glyco_transf_8	Glycosyl transferase family 8	ENOG410YCD3	Galacturonosyltransferase	.	ExpAA=18.79^PredHel=1^Topology=i12-29o	.	GO:0071555|cell wall organization;GO:0045489|pectin biosynthetic process	GO:0047262|polygalacturonate 4-alpha-galacturonosyltransferase activityGO:0016757|transferase activity, transferring glycosyl groups	GO:0005768|endosome;GO:0005794|Golgi apparatus;GO:0000139|Golgi membrane;GO:0016021|integral component of membrane;GO:0005802|trans-Golgi network;GO:0005774|vacuolar membrane	K13648|GAUT; alpha-1,4-galacturonosyltransferase [EC:2.4.1.43]	map00500|Starch and sucrose metabolism;map00520|Amino sugar and nucleotide sugar metabolism
f2p30_1428_7693	gi|118486621|gb|EF147117.1|	2374	E:0	Populus trichocarpa clone WS01227_N20 unknown mRNA	gi|118486622|gb|ABK95148.1|	816	E:0	unknown [Populus trichocarpa]	GDPD5_ARATH	608	E:0	RecName: Full=Glycerophosphodiester phosphodiesterase GDPD5 {ECO:0000305};^Eukaryota; Viridiplantae; Streptophyta; Embryophyta; Tracheophyta; Spermatophyta; Magnoliophyta; eudicotyledons; Gunneridae; Pentapetalae; rosids; malvids; Brassicales; Brassicaceae; Camelineae; Arabidopsis	GDPD5_ARATH	607	E:0	RecName: Full=Glycerophosphodiester phosphodiesterase GDPD5 {ECO:0000305};^Eukaryota; Viridiplantae; Streptophyta; Embryophyta; Tracheophyta; Spermatophyta; Magnoliophyta; eudicotyledons; Gunneridae; Pentapetalae; rosids; malvids; Brassicales; Brassicaceae; Camelineae; Arabidopsis	PF03009.16	GDPD	Glycerophosphoryl diester phosphodiesterase family	COG0584	glycerophosphoryl diester phosphodiesterase	.	ExpAA=22.52^PredHel=1^Topology=i21-43o	.	GO:0006071|glycerol metabolic process;GO:0006629|lipid metabolic processGO:0006629|lipid metabolic process	GO:0008889|glycerophosphodiester phosphodiesterase activityGO:0008081|phosphoric diester hydrolase activity	GO:0005618|cell wall;GO:0005576|extracellular region;GO:0005773|vacuole	K01126|E3.1.4.46, glpQ, ugpQ; glycerophosphoryl diester phosphodiesterase [EC:3.1.4.46]	map00564|Glycerophospholipid metabolism
f2p60_3190_18980	gi|743934636|ref|XM_011013359.1|	3467	E:0	PREDICTED: Populus euphratica histone acetyltransferase HAC1-like (LOC105116157), transcript variant X1, mRNA	gi|743935837|ref|XP_011012295.1|	802	E:0	PREDICTED: histone acetyltransferase HAC1-like [Populus euphratica]	HAC1_ARATH	225	E:7e-59	RecName: Full=Histone acetyltransferase HAC1;^Eukaryota; Viridiplantae; Streptophyta; Embryophyta; Tracheophyta; Spermatophyta; Magnoliophyta; eudicotyledons; Gunneridae; Pentapetalae; rosids; malvids; Brassicales; Brassicaceae; Camelineae; Arabidopsis	HAC12_ARATH	336	E:2e-96	RecName: Full=Histone acetyltransferase HAC12;^Eukaryota; Viridiplantae; Streptophyta; Embryophyta; Tracheophyta; Spermatophyta; Magnoliophyta; eudicotyledons; Gunneridae; Pentapetalae; rosids; malvids; Brassicales; Brassicaceae; Camelineae; Arabidopsis	PF08547.11	CIA30	Complex I intermediate-associated protein 30 (CIA30)	ENOG410XPJ0	histone acetyltransferase	.	ExpAA=18.45^PredHel=1^Topology=o589-611i	.	GO:0009908|flower development;GO:0006473|protein acetylation;GO:0006355|regulation of transcription, DNA-templated;GO:0006351|transcription, DNA-templated	GO:0004402|histone acetyltransferase activity;GO:0003712|transcription cofactor activity;GO:0008270|zinc ion binding	GO:0005634|nucleus	K04498|EP300, CREBBP, KAT3; E1A/CREB-binding protein [EC:2.3.1.48]	map05206|MicroRNAs in cancer;map05200|Pathways in cancer;map05203|Viral carcinogenesis;map05164|Influenza A;map05166|HTLV-I infection;map04520|Adherens junction;map05161|Hepatitis B;map05016|Huntington's disease;map05168|Herpes simplex infection;map05169|Epstein-Barr virus infection;map04922|Glucagon signaling pathway;map04066|HIF-1 signaling pathway;map04630|Jak-STAT signaling pathway;map04068|F…
f2p60_1278_8778	gi|118487277|gb|EF147454.1|	1482	E:0	Populus trichocarpa clone WS01231_F17 unknown mRNA	gi|118487278|gb|ABK95467.1|	390	E:7e-133	unknown [Populus trichocarpa]	SPCS2_ARATH	323	E:8e-108	RecName: Full=Probable signal peptidase complex subunit 2;^Eukaryota; Viridiplantae; Streptophyta; Embryophyta; Tracheophyta; Spermatophyta; Magnoliophyta; eudicotyledons; Gunneridae; Pentapetalae; rosids; malvids; Brassicales; Brassicaceae; Camelineae; Arabidopsis	SPCS2_ARATH	323	E:2e-111	RecName: Full=Probable signal peptidase complex subunit 2;^Eukaryota; Viridiplantae; Streptophyta; Embryophyta; Tracheophyta; Spermatophyta; Magnoliophyta; eudicotyledons; Gunneridae; Pentapetalae; rosids; malvids; Brassicales; Brassicaceae; Camelineae; Arabidopsis	PF06703.10	SPC25	Microsomal signal peptidase 25 kDa subunit (SPC25)	ENOG4111HIK	signal peptidase complex subunit 2	.	ExpAA=41.05^PredHel=2^Topology=i48-67o77-99i	.	GO:0045047|protein targeting to ER;GO:0006465|signal peptide processingGO:0006465|signal peptide processing	GO:0008233|peptidase activityGO:0008233|peptidase activity	GO:0005783|endoplasmic reticulum;GO:0016021|integral component of membrane;GO:0031090|organelle membrane;GO:0005787|signal peptidase complexGO:0005787|signal peptidase complex;GO:0016021|integral component of membrane	K12947|SPCS2, SPC2; signal peptidase complex subunit 2 [EC:3.4.-.-]	map03060|Protein export
f3p56_1659_24104	gi|566157477|ref|XM_002302347.2|	2817	E:0	Populus trichocarpa hypothetical protein (POPTR_0002s11500g) mRNA, complete cds	gi|566157478|ref|XP_002302383.2|	875	E:0	hypothetical protein POPTR_0002s11500g [Populus trichocarpa]	AVT6A_ARATH	514	E:1e-176	RecName: Full=Amino acid transporter AVT6A {ECO:0000305};^Eukaryota; Viridiplantae; Streptophyta; Embryophyta; Tracheophyta; Spermatophyta; Magnoliophyta; eudicotyledons; Gunneridae; Pentapetalae; rosids; malvids; Brassicales; Brassicaceae; Camelineae; Arabidopsis	AVT6A_ARATH	527	E:0	RecName: Full=Amino acid transporter AVT6A {ECO:0000305};^Eukaryota; Viridiplantae; Streptophyta; Embryophyta; Tracheophyta; Spermatophyta; Magnoliophyta; eudicotyledons; Gunneridae; Pentapetalae; rosids; malvids; Brassicales; Brassicaceae; Camelineae; Arabidopsis	PF01490.17	Aa_trans	Transmembrane amino acid transporter protein	COG0814	amino acid transport	.	ExpAA=235.58^PredHel=11^Topology=i34-56o66-88i119-141o161-183i196-218o233-255i276-295o321-343i363-385o390-409i425-447o	.	GO:0003333|amino acid transmembrane transportGO:0003333|amino acid transmembrane transport	GO:0015171|amino acid transmembrane transporter activity	GO:0016021|integral component of membrane;GO:0005774|vacuolar membrane;GO:0005773|vacuole	K14207|SLC38A2, SNAT2; solute carrier family 38 (sodium-coupled neutral amino acid transporter), member 2	map04974|Protein digestion and absorption;map04724|Glutamatergic synapse;map04727|GABAergic synapse
f2p19_1406_25926	gi|566192151|ref|XM_002316295.2|	2416	E:0	Populus trichocarpa hypothetical protein (POPTR_0010s22200g) mRNA, complete cds	gi|743843858|ref|XP_011027060.1|	491	E:3e-169	PREDICTED: CDP-diacylglycerol--glycerol-3-phosphate 3-phosphatidyltransferase 2-like [Populus euphratica]	PGPS2_ARATH	313	E:1e-102	RecName: Full=CDP-diacylglycerol--glycerol-3-phosphate 3-phosphatidyltransferase 2;^Eukaryota; Viridiplantae; Streptophyta; Embryophyta; Tracheophyta; Spermatophyta; Magnoliophyta; eudicotyledons; Gunneridae; Pentapetalae; rosids; malvids; Brassicales; Brassicaceae; Camelineae; Arabidopsis	PGPS2_ARATH	313	E:2e-105	RecName: Full=CDP-diacylglycerol--glycerol-3-phosphate 3-phosphatidyltransferase 2;^Eukaryota; Viridiplantae; Streptophyta; Embryophyta; Tracheophyta; Spermatophyta; Magnoliophyta; eudicotyledons; Gunneridae; Pentapetalae; rosids; malvids; Brassicales; Brassicaceae; Camelineae; Arabidopsis	PF01066.20	CDP-OH_P_transf	CDP-alcohol phosphatidyltransferase	COG0558	cdp-diacylglycerol-glycerol-3-phosphate 3-phosphatidyltransferase	.	ExpAA=77.16^PredHel=3^Topology=i94-116o121-143i256-278o	.	GO:0046474|glycerophospholipid biosynthetic process;GO:0006655|phosphatidylglycerol biosynthetic processGO:0008654|phospholipid biosynthetic process	GO:0008444|CDP-diacylglycerol-glycerol-3-phosphate 3-phosphatidyltransferase activity;GO:0030145|manganese ion bindingGO:0016780|phosphotransferase activity, for other substituted phosphate groups	GO:0009941|chloroplast envelope;GO:0005783|endoplasmic reticulum;GO:0016021|integral component of membrane;GO:0043231|intracellular membrane-bounded organelle;GO:0005739|mitochondrion;GO:0031090|organelle membraneGO:0016020|membrane	K00995|pgsA, PGS1; CDP-diacylglycerol--glycerol-3-phosphate 3-phosphatidyltransferase [EC:2.7.8.5]	map01100|Metabolic pathways;map00564|Glycerophospholipid metabolism
f2p60_1827_22987	gi|566208408|ref|XM_006373625.1|	3099	E:0	Populus trichocarpa hypothetical protein (POPTR_0016s03090g) mRNA, complete cds	gi|566208407|ref|XP_002323218.2|	793	E:0	hypothetical protein POPTR_0016s03090g [Populus trichocarpa]	C98A2_SOYBN	669	E:0	RecName: Full=Cytochrome P450 98A2;^Eukaryota; Viridiplantae; Streptophyta; Embryophyta; Tracheophyta; Spermatophyta; Magnoliophyta; eudicotyledons; Gunneridae; Pentapetalae; rosids; fabids; Fabales; Fabaceae; Papilionoideae; Phaseoleae; Glycine; Soja	C98A2_SOYBN	681	E:0	RecName: Full=Cytochrome P450 98A2;^Eukaryota; Viridiplantae; Streptophyta; Embryophyta; Tracheophyta; Spermatophyta; Magnoliophyta; eudicotyledons; Gunneridae; Pentapetalae; rosids; fabids; Fabales; Fabaceae; Papilionoideae; Phaseoleae; Glycine; Soja	PF00067.21	p450	Cytochrome P450	COG2124	Cytochrome p450	.	ExpAA=23.82^PredHel=1^Topology=i13-35o	.	GO:0009809|lignin biosynthetic processGO:0055114|oxidation-reduction process	GO:0020037|heme binding;GO:0005506|iron ion binding;GO:0016709|oxidoreductase activity, acting on paired donors, with incorporation or reduction of molecular oxygen, NAD(P)H as one donor, and incorporation of one atom of oxygenGO:0005506|iron ion binding;GO:0016705|oxidoreductase activity, acting on paired donors, with incorporation or reduction of molecular oxygen;GO:0020037|heme binding	GO:0016021|integral component of membrane;GO:0016020|membrane	K09754|CYP98A3, C3'H; coumaroylquinate(coumaroylshikimate) 3'-monooxygenase [EC:1.14.13.36]	map00945|Stilbenoid, diarylheptanoid and gingerol biosynthesis;map01100|Metabolic pathways;map00941|Flavonoid biosynthesis;map00940|Phenylpropanoid biosynthesis;map01110|Biosynthesis of secondary metabolites
f3p60_2446_20525	gi|659103376|gb|KJ664926.1|	4455	E:0	Populus fremontii chloroplast, complete genome	gi|110227105|ref|YP_665584.1|	966	E:0	photosystem II CP47 protein [Populus alba]	PSBB_POPTR	966	E:0	RecName: Full=Photosystem II CP47 reaction center protein {ECO:0000255|HAMAP-Rule:MF_01495};^Eukaryota; Viridiplantae; Streptophyta; Embryophyta; Tracheophyta; Spermatophyta; Magnoliophyta; eudicotyledons; Gunneridae; Pentapetalae; rosids; fabids; Malpighiales; Salicaceae; Saliceae; Populus	PSBB_POPTR	1031	E:0	RecName: Full=Photosystem II CP47 reaction center protein {ECO:0000255|HAMAP-Rule:MF_01495};^Eukaryota; Viridiplantae; Streptophyta; Embryophyta; Tracheophyta; Spermatophyta; Magnoliophyta; eudicotyledons; Gunneridae; Pentapetalae; rosids; fabids; Malpighiales; Salicaceae; Saliceae; Populus	PF00421.18	PSII	Photosystem II protein	ENOG411185M	One of the components of the core antenna complex of photosystem II. It binds chlorophyll and helps catalyze the primary light-induced photochemical processes of photosystem II (By similarity)	.	ExpAA=136.01^PredHel=5^Topology=i20-42o96-118i139-161o198-217i237-259o	.	GO:0009772|photosynthetic electron transport in photosystem II;GO:0018298|protein-chromophore linkageGO:0009767|photosynthetic electron transport chain;GO:0019684|photosynthesis, light reaction	GO:0016168|chlorophyll binding;GO:0045156|electron transporter, transferring electrons within the cyclic electron transport pathway of photosynthesis activityGO:0016168|chlorophyll binding	GO:0009535|chloroplast thylakoid membrane;GO:0016021|integral component of membrane;GO:0009523|photosystem IIGO:0009521|photosystem;GO:0016020|membrane	K02704|psbB; photosystem II CP47 chlorophyll apoprotein	map01100|Metabolic pathways;map00195|Photosynthesis
f2p56_2368_20763	gi|566210461|ref|XM_006372255.1|	3936	E:0	Populus trichocarpa Methylenetetrahydrofolate reductase family protein (POPTR_0017s00520g) mRNA, complete cds	gi|566210462|ref|XP_006372317.1|	1209	E:0	Methylenetetrahydrofolate reductase family protein [Populus trichocarpa]	MTHR2_ARATH	1036	E:0	RecName: Full=Methylenetetrahydrofolate reductase 2;^Eukaryota; Viridiplantae; Streptophyta; Embryophyta; Tracheophyta; Spermatophyta; Magnoliophyta; eudicotyledons; Gunneridae; Pentapetalae; rosids; malvids; Brassicales; Brassicaceae; Camelineae; Arabidopsis	MTHR2_ARATH	1042	E:0	RecName: Full=Methylenetetrahydrofolate reductase 2;^Eukaryota; Viridiplantae; Streptophyta; Embryophyta; Tracheophyta; Spermatophyta; Magnoliophyta; eudicotyledons; Gunneridae; Pentapetalae; rosids; malvids; Brassicales; Brassicaceae; Camelineae; Arabidopsis	PF02219.16	MTHFR	Methylenetetrahydrofolate reductase	COG0685	Methylenetetrahydrofolate reductase	.	ExpAA=16.46^PredHel=1^Topology=i7-29o	.	GO:0006555|methionine metabolic process;GO:0006730|one-carbon metabolic process;GO:0035999|tetrahydrofolate interconversionGO:0006555|methionine metabolic process;GO:0055114|oxidation-reduction process	GO:0004489|methylenetetrahydrofolate reductase (NAD(P)H) activityGO:0004489|methylenetetrahydrofolate reductase (NAD(P)H) activity	GO:0005829|cytosol	K00297|metF, MTHFR; methylenetetrahydrofolate reductase (NADPH) [EC:1.5.1.20]	map01200|Carbon metabolism;map01100|Metabolic pathways;map01120|Microbial metabolism in diverse environments;map00720|Carbon fixation pathways in prokaryotes;map00670|One carbon pool by folate
f2p60_1813_23089	gi|566239123|ref|XM_002325901.2|	2865	E:0	Populus trichocarpa hypothetical protein (POPTR_0019s09950g) mRNA, complete cds	gi|566239124|ref|XP_002325937.2|	1014	E:0	hypothetical protein POPTR_0019s09950g [Populus trichocarpa]	WSD1_ARATH	346	E:2e-110	RecName: Full=O-acyltransferase WSD1;^Eukaryota; Viridiplantae; Streptophyta; Embryophyta; Tracheophyta; Spermatophyta; Magnoliophyta; eudicotyledons; Gunneridae; Pentapetalae; rosids; malvids; Brassicales; Brassicaceae; Camelineae; Arabidopsis	WSD1_ARATH	346	E:8e-112	RecName: Full=O-acyltransferase WSD1;^Eukaryota; Viridiplantae; Streptophyta; Embryophyta; Tracheophyta; Spermatophyta; Magnoliophyta; eudicotyledons; Gunneridae; Pentapetalae; rosids; malvids; Brassicales; Brassicaceae; Camelineae; Arabidopsis	PF03007.15	WES_acyltransf	Wax ester synthase-like Acyl-CoA acyltransferase domain	ENOG410ZXQW	O-acyltransferase (WSD1-like) family protein	.	ExpAA=24.37^PredHel=1^Topology=i197-219o	.	GO:0019432|triglyceride biosynthetic process;GO:0010025|wax biosynthetic processGO:0045017|glycerolipid biosynthetic process	GO:0004144|diacylglycerol O-acyltransferase activity;GO:0047196|long-chain-alcohol O-fatty-acyltransferase activity;GO:0103095|wax ester synthase activityGO:0004144|diacylglycerol O-acyltransferase activity	GO:0005783|endoplasmic reticulum;GO:0005789|endoplasmic reticulum membrane;GO:0016021|integral component of membrane;GO:0005886|plasma membrane	K15406|WSD1; wax-ester synthase / diacylglycerol O-acyltransferase [EC:2.3.1.75 2.3.1.20]	map00073|Cutin, suberine and wax biosynthesis
f2p60_1555_24811	gi|743908323|ref|XM_011049307.1|	2514	E:0	PREDICTED: Populus euphratica palmitoyl-protein thioesterase 1-like (LOC105141915), transcript variant X1, mRNA	gi|566149158|ref|XP_006368986.1|	709	E:0	hypothetical protein POPTR_0001s15440g [Populus trichocarpa]	PPT1_CAEEL	165	E:8e-45	RecName: Full=Palmitoyl-protein thioesterase 1;^Eukaryota; Metazoa; Ecdysozoa; Nematoda; Chromadorea; Rhabditida; Rhabditoidea; Rhabditidae; Peloderinae; Caenorhabditis	PPT1_CAEEL	167	E:2e-46	RecName: Full=Palmitoyl-protein thioesterase 1;^Eukaryota; Metazoa; Ecdysozoa; Nematoda; Chromadorea; Rhabditida; Rhabditoidea; Rhabditidae; Peloderinae; Caenorhabditis	PF02089.14	Palm_thioest	Palmitoyl protein thioesterase	COG1075	Triacylglycerol Lipase	.	ExpAA=22.39^PredHel=1^Topology=i53-72o	.	GO:0044257|cellular protein catabolic process;GO:0007005|mitochondrion organization;GO:0018991|oviposition;GO:0009791|post-embryonic development;GO:0002084|protein depalmitoylation;GO:0006898|receptor-mediated endocytosis	GO:0008474|palmitoyl-(protein) hydrolase activityGO:0098599|palmitoyl hydrolase activity	GO:0005764|lysosome	K01074|PPT; palmitoyl-protein thioesterase [EC:3.1.2.22]	map00062|Fatty acid elongation;map01100|Metabolic pathways;map04142|Lysosome;map01212|Fatty acid metabolism
f3p60_1771_5695	gi|566175902|ref|XM_006381320.1|	3107	E:0	Populus trichocarpa hypothetical protein (POPTR_0006s12390g) mRNA, complete cds	gi|566175903|ref|XP_006381382.1|	815	E:0	hypothetical protein POPTR_0006s12390g [Populus trichocarpa]	PLY12_ARATH	664	E:0	RecName: Full=Probable pectate lyase 12;^Eukaryota; Viridiplantae; Streptophyta; Embryophyta; Tracheophyta; Spermatophyta; Magnoliophyta; eudicotyledons; Gunneridae; Pentapetalae; rosids; malvids; Brassicales; Brassicaceae; Camelineae; Arabidopsis	PLY12_ARATH	720	E:0	RecName: Full=Probable pectate lyase 12;^Eukaryota; Viridiplantae; Streptophyta; Embryophyta; Tracheophyta; Spermatophyta; Magnoliophyta; eudicotyledons; Gunneridae; Pentapetalae; rosids; malvids; Brassicales; Brassicaceae; Camelineae; Arabidopsis	PF00544.18	Pec_lyase_C	Pectate lyase	COG3866	pectate lyase activity	.	ExpAA=31.63^PredHel=1^Topology=o460-482i	.	GO:0045490|pectin catabolic process	GO:0046872|metal ion binding;GO:0030570|pectate lyase activity	GO:0031225|anchored component of membrane	K01728|pel; pectate lyase [EC:4.2.2.2]	map00040|Pentose and glucuronate interconversions
f3p60_945_30586	gi|118481734|gb|EF144571.1|	1616	E:0	Populus trichocarpa clone WS01111_B04 unknown mRNA	gi|224097190|ref|XP_002310869.1|	446	E:6e-156	hypothetical protein POPTR_0007s14290g [Populus trichocarpa]	HACD_ARATH	368	E:1e-126	RecName: Full=Very-long-chain (3R)-3-hydroxyacyl-CoA dehydratase PASTICCINO 2 {ECO:0000305};^Eukaryota; Viridiplantae; Streptophyta; Embryophyta; Tracheophyta; Spermatophyta; Magnoliophyta; eudicotyledons; Gunneridae; Pentapetalae; rosids; malvids; Brassicales; Brassicaceae; Camelineae; Arabidopsis	HACD_ARATH	368	E:3e-128	RecName: Full=Very-long-chain (3R)-3-hydroxyacyl-CoA dehydratase PASTICCINO 2 {ECO:0000305};^Eukaryota; Viridiplantae; Streptophyta; Embryophyta; Tracheophyta; Spermatophyta; Magnoliophyta; eudicotyledons; Gunneridae; Pentapetalae; rosids; malvids; Brassicales; Brassicaceae; Camelineae; Arabidopsis	PF04387.13	PTPLA	Protein tyrosine phosphatase-like protein, PTPLA	COG5198	Protein tyrosine phosphatase-like	.	ExpAA=93.93^PredHel=4^Topology=i13-32o100-122i143-165o187-209i	.	GO:0030497|fatty acid elongation;GO:0007275|multicellular organism development;GO:0030148|sphingolipid biosynthetic process	GO:0102343|3-hydroxy-arachidoyl-CoA dehydratase activity;GO:0102344|3-hydroxy-behenoyl-CoA dehydratase activity;GO:0102345|3-hydroxy-lignoceroyl-CoA dehydratase activity;GO:0018812|3-hydroxyacyl-CoA dehydratase activity	GO:0030176|integral component of endoplasmic reticulum membrane;GO:0005634|nucleus	K10703|PHS1, PAS2; very-long-chain (3R)-3-hydroxyacyl-CoA dehydratase [EC:4.2.1.134]	map00062|Fatty acid elongation;map01212|Fatty acid metabolism;map01110|Biosynthesis of secondary metabolites;map01040|Biosynthesis of unsaturated fatty acids
f11p60_989_11611	gi|566166970|ref|XM_002306106.2|	1742	E:0	Populus trichocarpa Vacuolar ATP synthase 16 kDa proteolipid subunit 1/3/5 family protein (POPTR_0004s17030g) mRNA, complete cds	gi|224103313|ref|XP_002313006.1|	236	E:1e-73	Vacuolar ATP synthase 16 kDa proteolipid subunit 1/3/5 family protein [Populus trichocarpa]	VATL5_ARATH	224	E:5e-71	RecName: Full=V-type proton ATPase subunit c5;^Eukaryota; Viridiplantae; Streptophyta; Embryophyta; Tracheophyta; Spermatophyta; Magnoliophyta; eudicotyledons; Gunneridae; Pentapetalae; rosids; malvids; Brassicales; Brassicaceae; Camelineae; Arabidopsis	VATL5_ARATH	316	E:1e-109	RecName: Full=V-type proton ATPase subunit c5;^Eukaryota; Viridiplantae; Streptophyta; Embryophyta; Tracheophyta; Spermatophyta; Magnoliophyta; eudicotyledons; Gunneridae; Pentapetalae; rosids; malvids; Brassicales; Brassicaceae; Camelineae; Arabidopsis	PF00137.20	ATP-synt_C	ATP synthase subunit C	COG0636	F(1)F(0) ATP synthase produces ATP from ADP in the presence of a proton or sodium gradient. F-type ATPases consist of two structural domains, F(1) containing the extramembraneous catalytic core and F(0) containing the membrane proton channel, linked together by a central stalk and a peripheral stalk. During catalysis, ATP synthesis in the catalytic domain of F(1) is coupled via a rotary mechanism…	.	ExpAA=91.13^PredHel=4^Topology=i12-34o54-76i93-115o130-152i	.	GO:0015991|ATP hydrolysis coupled proton transport;GO:0007035|vacuolar acidificationGO:0015991|ATP hydrolysis coupled proton transport	GO:0046961|proton-transporting ATPase activity, rotational mechanismGO:0015078|hydrogen ion transmembrane transporter activity	GO:0016021|integral component of membrane;GO:0005886|plasma membrane;GO:0005774|vacuolar membrane;GO:0000220|vacuolar proton-transporting V-type ATPase, V0 domain;GO:0005773|vacuoleGO:0033177|proton-transporting two-sector ATPase complex, proton-transporting domain	K02155|ATPeV0C, ATP6L; V-type H+-transporting ATPase 16kDa proteolipid subunit	map05110|Vibrio cholerae infection;map04142|Lysosome;map04145|Phagosome;map05120|Epithelial cell signaling in Helicobacter pylori infection;map05152|Tuberculosis;map04721|Synaptic vesicle cycle;map05323|Rheumatoid arthritis;map04966|Collecting duct acid secretion;map01100|Metabolic pathways;map00190|Oxidative phosphorylation
f2p60_3305_18813	gi|566207186|ref|XM_002322278.2|	5755	E:0	Populus trichocarpa respiratory burst oxidase C family protein (POPTR_0015s12130g) mRNA, complete cds	gi|566207187|ref|XP_002322314.2|	1795	E:0	respiratory burst oxidase C family protein [Populus trichocarpa]	RBOHC_SOLTU	1380	E:0	RecName: Full=Respiratory burst oxidase homolog protein C;^Eukaryota; Viridiplantae; Streptophyta; Embryophyta; Tracheophyta; Spermatophyta; Magnoliophyta; eudicotyledons; Gunneridae; Pentapetalae; asterids; lamiids; Solanales; Solanaceae; Solanoideae; Solaneae; Solanum	RBOHC_SOLTU	1459	E:0	RecName: Full=Respiratory burst oxidase homolog protein C;^Eukaryota; Viridiplantae; Streptophyta; Embryophyta; Tracheophyta; Spermatophyta; Magnoliophyta; eudicotyledons; Gunneridae; Pentapetalae; asterids; lamiids; Solanales; Solanaceae; Solanoideae; Solaneae; Solanum	PF08414.9	NADPH_Ox	Respiratory burst NADPH oxidase	ENOG410XNZY	NADPH Oxidase	.	ExpAA=106.61^PredHel=4^Topology=o345-367i487-509o529-551i710-727o	.	GO:0055114|oxidation-reduction process	GO:0005509|calcium ion binding;GO:0050664|oxidoreductase activity, acting on NAD(P)H, oxygen as acceptor;GO:0004601|peroxidase activityGO:0004601|peroxidase activity;GO:0050664|oxidoreductase activity, acting on NAD(P)H, oxygen as acceptor;GO:0005509|calcium ion binding;GO:0016491|oxidoreductase activity	GO:0016021|integral component of membrane	K13447|RBOH; respiratory burst oxidase [EC:1.6.3.- 1.11.1.-]	map04626|Plant-pathogen interaction
f3p60_633_14712	gi|160959938|emb|CU227896.1|	983	E:0	Populus EST from severe drought-stressed leaves	gi|224092476|ref|XP_002309626.1|	170	E:1e-50	Photosystem I reaction center subunit psaK family protein [Populus trichocarpa]	PSAK_ARATH	154	E:9e-46	RecName: Full=Photosystem I reaction center subunit psaK, chloroplastic;^Eukaryota; Viridiplantae; Streptophyta; Embryophyta; Tracheophyta; Spermatophyta; Magnoliophyta; eudicotyledons; Gunneridae; Pentapetalae; rosids; malvids; Brassicales; Brassicaceae; Camelineae; Arabidopsis	PSAK_ARATH	184	E:2e-59	RecName: Full=Photosystem I reaction center subunit psaK, chloroplastic;^Eukaryota; Viridiplantae; Streptophyta; Embryophyta; Tracheophyta; Spermatophyta; Magnoliophyta; eudicotyledons; Gunneridae; Pentapetalae; rosids; malvids; Brassicales; Brassicaceae; Camelineae; Arabidopsis	PF01241.17	PSI_PSAK	Photosystem I psaG / psaK	ENOG4111RY5	Photosystem I reaction center subunit	.	ExpAA=41.00^PredHel=2^Topology=i22-44o76-98i	.	GO:0015979|photosynthesisGO:0015979|photosynthesis	GO:0016168|chlorophyll binding	GO:0009507|chloroplast;GO:0009534|chloroplast thylakoid;GO:0009535|chloroplast thylakoid membrane;GO:0016021|integral component of membrane;GO:0009522|photosystem I;GO:0009579|thylakoidGO:0009522|photosystem I;GO:0016020|membrane	K02698|psaK; photosystem I subunit X	map01100|Metabolic pathways;map00195|Photosynthesis
f9p60_2003_22100	gi|566189887|ref|XM_006378315.1|	3428	E:0	Populus trichocarpa hypothetical protein (POPTR_0010s09060g) mRNA, complete cds	gi|566189888|ref|XP_006378377.1|	1053	E:0	hypothetical protein POPTR_0010s09060g [Populus trichocarpa]	KCS11_ARATH	751	E:0	RecName: Full=3-ketoacyl-CoA synthase 11 {ECO:0000303|PubMed:18465198};^Eukaryota; Viridiplantae; Streptophyta; Embryophyta; Tracheophyta; Spermatophyta; Magnoliophyta; eudicotyledons; Gunneridae; Pentapetalae; rosids; malvids; Brassicales; Brassicaceae; Camelineae; Arabidopsis	KCS11_ARATH	753	E:0	RecName: Full=3-ketoacyl-CoA synthase 11 {ECO:0000303|PubMed:18465198};^Eukaryota; Viridiplantae; Streptophyta; Embryophyta; Tracheophyta; Spermatophyta; Magnoliophyta; eudicotyledons; Gunneridae; Pentapetalae; rosids; malvids; Brassicales; Brassicaceae; Camelineae; Arabidopsis	PF08392.11	FAE1_CUT1_RppA	FAE1/Type III polyketide synthase-like protein	ENOG410Y5VH	3-ketoacyl-coa synthase	.	ExpAA=83.98^PredHel=2^Topology=o45-67i80-102o	.	GO:0006633|fatty acid biosynthetic process;GO:0009409|response to cold;GO:0009416|response to light stimulusGO:0006633|fatty acid biosynthetic process	GO:0102336|3-oxo-arachidoyl-CoA synthase activity;GO:0102337|3-oxo-cerotoyl-CoA synthase activity;GO:0102338|3-oxo-lignoceronyl-CoA synthase activityGO:0016747|transferase activity, transferring acyl groups other than amino-acyl groups;GO:0004315|3-oxoacyl-[acyl-carrier-protein] synthase activity	GO:0016021|integral component of membraneGO:0016020|membrane	K15397|KCS; 3-ketoacyl-CoA synthase [EC:2.3.1.199]	map00062|Fatty acid elongation;map01110|Biosynthesis of secondary metabolites
f2p55_2931_19380	gi|743799542|ref|XM_011015090.1|	4453	E:0	PREDICTED: Populus euphratica beta-1,3-galactosyltransferase 15-like (LOC105117419), transcript variant X2, mRNA	gi|566191332|ref|XP_002316134.2|	1313	E:0	galactosyltransferase family protein [Populus trichocarpa]	B3GTF_ARATH	856	E:0	RecName: Full=Beta-1,3-galactosyltransferase GALT1 {ECO:0000305};^Eukaryota; Viridiplantae; Streptophyta; Embryophyta; Tracheophyta; Spermatophyta; Magnoliophyta; eudicotyledons; Gunneridae; Pentapetalae; rosids; malvids; Brassicales; Brassicaceae; Camelineae; Arabidopsis	B3GTF_ARATH	856	E:0	RecName: Full=Beta-1,3-galactosyltransferase GALT1 {ECO:0000305};^Eukaryota; Viridiplantae; Streptophyta; Embryophyta; Tracheophyta; Spermatophyta; Magnoliophyta; eudicotyledons; Gunneridae; Pentapetalae; rosids; malvids; Brassicales; Brassicaceae; Camelineae; Arabidopsis	PF00337.21	Gal-bind_lectin	Galactoside-binding lectin	ENOG410ZZ1B	UDP-GlcNAc beta-Gal beta-1,3-N-acetylglucosaminyltransferase	.	ExpAA=19.86^PredHel=1^Topology=i5-24o	.	GO:0010493|Lewis a epitope biosynthetic process;GO:0006486|protein glycosylationGO:0006486|protein glycosylation	GO:0030246|carbohydrate binding;GO:0010488|UDP-galactose:N-glycan beta-1,3-galactosyltransferase activityGO:0030246|carbohydrate binding;GO:0008378|galactosyltransferase activity	GO:0005794|Golgi apparatus;GO:0000139|Golgi membrane;GO:0016021|integral component of membraneGO:0016020|membrane	K14413|GALT1; beta-1,3-galactosyltransferase [EC:2.4.1.-]	map00513|Various types of N-glycan biosynthesis
f2p60_1439_7399	gi|566195039|ref|XM_002316864.2|	2353	E:0	Populus trichocarpa cytidylyltransferase family protein (POPTR_0011s12080g) mRNA, complete cds	gi|224114948|ref|XP_002316900.1|	533	E:0	cytidylyltransferase family protein [Populus trichocarpa]	KDSB_ARATH	485	E:4e-169	RecName: Full=3-deoxy-manno-octulosonate cytidylyltransferase, mitochondrial {ECO:0000303|PubMed:21893514};^Eukaryota; Viridiplantae; Streptophyta; Embryophyta; Tracheophyta; Spermatophyta; Magnoliophyta; eudicotyledons; Gunneridae; Pentapetalae; rosids; malvids; Brassicales; Brassicaceae; Camelineae; Arabidopsis	KDSB_ARATH	500	E:5e-178	RecName: Full=3-deoxy-manno-octulosonate cytidylyltransferase, mitochondrial {ECO:0000303|PubMed:21893514};^Eukaryota; Viridiplantae; Streptophyta; Embryophyta; Tracheophyta; Spermatophyta; Magnoliophyta; eudicotyledons; Gunneridae; Pentapetalae; rosids; malvids; Brassicales; Brassicaceae; Camelineae; Arabidopsis	PF02348.18	CTP_transf_3	Cytidylyltransferase	COG1212	Activates KDO (a required 8-carbon sugar) for incorporation into bacterial lipopolysaccharide in Gram-negative bacteria (By similarity)	.	ExpAA=22.55^PredHel=1^Topology=i17-39o	.	GO:0071555|cell wall organization;GO:0033468|CMP-keto-3-deoxy-D-manno-octulosonic acid biosynthetic process;GO:0009555|pollen development;GO:0009860|pollen tube growth	GO:0008690|3-deoxy-manno-octulosonate cytidylyltransferase activity	GO:0031307|integral component of mitochondrial outer membrane;GO:0005739|mitochondrion	K00979|kdsB; 3-deoxy-manno-octulosonate cytidylyltransferase (CMP-KDO synthetase) [EC:2.7.7.38]	map00540|Lipopolysaccharide biosynthesis;map01100|Metabolic pathways
f2p60_2138_21479	gi|743918678|ref|XM_011005046.1|	3579	E:0	PREDICTED: Populus euphratica lycopene epsilon cyclase, chloroplastic (LOC105110117), transcript variant X1, mRNA	gi|743918679|ref|XP_011003348.1|	992	E:0	PREDICTED: lycopene epsilon cyclase, chloroplastic isoform X1 [Populus euphratica]	LCYE_ARATH	726	E:0	RecName: Full=Lycopene epsilon cyclase, chloroplastic;^Eukaryota; Viridiplantae; Streptophyta; Embryophyta; Tracheophyta; Spermatophyta; Magnoliophyta; eudicotyledons; Gunneridae; Pentapetalae; rosids; malvids; Brassicales; Brassicaceae; Camelineae; Arabidopsis	LCYE_ARATH	786	E:0	RecName: Full=Lycopene epsilon cyclase, chloroplastic;^Eukaryota; Viridiplantae; Streptophyta; Embryophyta; Tracheophyta; Spermatophyta; Magnoliophyta; eudicotyledons; Gunneridae; Pentapetalae; rosids; malvids; Brassicales; Brassicaceae; Camelineae; Arabidopsis	PF05834.11	Lycopene_cycl	Lycopene cyclase protein	ENOG410XPIY	lycopene	.	ExpAA=41.36^PredHel=2^Topology=o470-492i504-526o	.	GO:0016117|carotenoid biosynthetic process;GO:0016123|xanthophyll biosynthetic process	GO:0045435|lycopene epsilon cyclase activity;GO:0016705|oxidoreductase activity, acting on paired donors, with incorporation or reduction of molecular oxygen	GO:0031969|chloroplast membrane;GO:0016021|integral component of membrane	K06444|lcyE, crtL2; lycopene epsilon-cyclase [EC:5.5.1.18]	map01100|Metabolic pathways;map01110|Biosynthesis of secondary metabolites;map00906|Carotenoid biosynthesis
f4p60_1689_23959	gi|118487912|gb|EF147776.1|	2846	E:0	Populus trichocarpa clone WS0124_P10 unknown mRNA	gi|743810525|ref|XP_011018770.1|	776	E:0	PREDICTED: S-adenosylmethionine synthase 4 [Populus euphratica]	METK4_POPTR	773	E:0	RecName: Full=S-adenosylmethionine synthase 4;^Eukaryota; Viridiplantae; Streptophyta; Embryophyta; Tracheophyta; Spermatophyta; Magnoliophyta; eudicotyledons; Gunneridae; Pentapetalae; rosids; fabids; Malpighiales; Salicaceae; Saliceae; Populus	METK4_POPTR	806	E:0	RecName: Full=S-adenosylmethionine synthase 4;^Eukaryota; Viridiplantae; Streptophyta; Embryophyta; Tracheophyta; Spermatophyta; Magnoliophyta; eudicotyledons; Gunneridae; Pentapetalae; rosids; fabids; Malpighiales; Salicaceae; Saliceae; Populus	PF00438.19	S-AdoMet_synt_N	S-adenosylmethionine synthetase, N-terminal domain	COG0192	Catalyzes the formation of S-adenosylmethionine from methionine and ATP	.	ExpAA=17.66^PredHel=1^Topology=i23-45o	.	GO:0006730|one-carbon metabolic process;GO:0006556|S-adenosylmethionine biosynthetic processGO:0006556|S-adenosylmethionine biosynthetic process	GO:0005524|ATP binding;GO:0046872|metal ion binding;GO:0004478|methionine adenosyltransferase activityGO:0004478|methionine adenosyltransferase activity	GO:0005829|cytosol	K00789|metK; S-adenosylmethionine synthetase [EC:2.5.1.6]	map01230|Biosynthesis of amino acids;map01100|Metabolic pathways;map00270|Cysteine and methionine metabolism;map01110|Biosynthesis of secondary metabolites
f2p60_2177_21319	gi|566208311|ref|XM_002323163.2|	3542	E:0	Populus trichocarpa hypothetical protein (POPTR_0016s02580g) mRNA, complete cds	gi|566208312|ref|XP_002323199.2|	910	E:0	hypothetical protein POPTR_0016s02580g [Populus trichocarpa]	ZDH13_ARATH	495	E:2e-166	RecName: Full=Probable protein S-acyltransferase 4;^Eukaryota; Viridiplantae; Streptophyta; Embryophyta; Tracheophyta; Spermatophyta; Magnoliophyta; eudicotyledons; Gunneridae; Pentapetalae; rosids; malvids; Brassicales; Brassicaceae; Camelineae; Arabidopsis	ZDH13_ARATH	522	E:3e-180	RecName: Full=Probable protein S-acyltransferase 4;^Eukaryota; Viridiplantae; Streptophyta; Embryophyta; Tracheophyta; Spermatophyta; Magnoliophyta; eudicotyledons; Gunneridae; Pentapetalae; rosids; malvids; Brassicales; Brassicaceae; Camelineae; Arabidopsis	PF01529.19	DHHC	DHHC palmitoyltransferase	COG5273	Zinc finger, DHHC-type containing	.	ExpAA=90.57^PredHel=4^Topology=i55-77o97-119i217-239o259-281i	.	GO:0048767|root hair elongation	GO:0019706|protein-cysteine S-palmitoyltransferase activity	GO:0016021|integral component of membrane;GO:0005886|plasma membrane;GO:0035618|root hair;GO:0030140|trans-Golgi network transport vesicle	K16675|ZDHHC9_14_18; palmitoyltransferase ZDHHC9/14/18 [EC:2.3.1.225]	map04391|Hippo signaling pathway - fly
f2p60_1251_9156	gi|566156001|ref|XM_002300709.2|	2115	E:0	Populus trichocarpa hypothetical protein (POPTR_0002s03260g) mRNA, complete cds	gi|566156002|ref|XP_002300745.2|	600	E:0	hypothetical protein POPTR_0002s03260g [Populus trichocarpa]	PER9_ARATH	487	E:7e-170	RecName: Full=Peroxidase 9;^Eukaryota; Viridiplantae; Streptophyta; Embryophyta; Tracheophyta; Spermatophyta; Magnoliophyta; eudicotyledons; Gunneridae; Pentapetalae; rosids; malvids; Brassicales; Brassicaceae; Camelineae; Arabidopsis	PER9_ARATH	523	E:0	RecName: Full=Peroxidase 9;^Eukaryota; Viridiplantae; Streptophyta; Embryophyta; Tracheophyta; Spermatophyta; Magnoliophyta; eudicotyledons; Gunneridae; Pentapetalae; rosids; malvids; Brassicales; Brassicaceae; Camelineae; Arabidopsis	PF00141.22	peroxidase	Peroxidase	ENOG410YFB5	peroxidase	.	ExpAA=18.53^PredHel=1^Topology=i7-29o	.	GO:0042744|hydrogen peroxide catabolic process;GO:0006979|response to oxidative stressGO:0006979|response to oxidative stress;GO:0055114|oxidation-reduction process	GO:0020037|heme binding;GO:0046872|metal ion binding;GO:0004601|peroxidase activityGO:0004601|peroxidase activity;GO:0020037|heme binding	GO:0005576|extracellular region	K00430|E1.11.1.7; peroxidase [EC:1.11.1.7]	map01100|Metabolic pathways;map00940|Phenylpropanoid biosynthesis;map01110|Biosynthesis of secondary metabolites
f5p60_2136_3772	gi|566196706|ref|XM_002318270.2|	3672	E:0	Populus trichocarpa aminotransferase class 1 and 2 family protein (POPTR_0012s04080g) mRNA, complete cds	gi|566196707|ref|XP_002318306.2|	929	E:0	aminotransferase class 1 and 2 family protein [Populus trichocarpa]	LCB1_ARATH	740	E:0	RecName: Full=Long chain base biosynthesis protein 1;^Eukaryota; Viridiplantae; Streptophyta; Embryophyta; Tracheophyta; Spermatophyta; Magnoliophyta; eudicotyledons; Gunneridae; Pentapetalae; rosids; malvids; Brassicales; Brassicaceae; Camelineae; Arabidopsis	LCB1_ARATH	791	E:0	RecName: Full=Long chain base biosynthesis protein 1;^Eukaryota; Viridiplantae; Streptophyta; Embryophyta; Tracheophyta; Spermatophyta; Magnoliophyta; eudicotyledons; Gunneridae; Pentapetalae; rosids; malvids; Brassicales; Brassicaceae; Camelineae; Arabidopsis	PF00155.20	Aminotran_1_2	Aminotransferase class I and II	COG0156	8-Amino-7-oxononanoate synthase	.	ExpAA=24.88^PredHel=1^Topology=o33-55i	.	GO:0016049|cell growth;GO:0043067|regulation of programmed cell death;GO:0030148|sphingolipid biosynthetic processGO:0009058|biosynthetic process	GO:0030170|pyridoxal phosphate binding;GO:0004758|serine C-palmitoyltransferase activityGO:0030170|pyridoxal phosphate binding	GO:0005783|endoplasmic reticulum;GO:0005789|endoplasmic reticulum membrane;GO:0016021|integral component of membrane	K00654|SPT; serine palmitoyltransferase [EC:2.3.1.50]	map04071|Sphingolipid signaling pathway;map01100|Metabolic pathways;map00600|Sphingolipid metabolism
f4p60_507_36404	gi|566184532|ref|XM_002311678.2|	531	E:1e-147	Populus trichocarpa hypothetical protein (POPTR_0008s17580g) mRNA, complete cds	gi|224107617|ref|XP_002314538.1|	143	E:3e-41	microsomal signal peptidase 12 kDa subunit family protein [Populus trichocarpa]	SPCS1_ARATH	115	E:1e-31	RecName: Full=Probable signal peptidase complex subunit 1;^Eukaryota; Viridiplantae; Streptophyta; Embryophyta; Tracheophyta; Spermatophyta; Magnoliophyta; eudicotyledons; Gunneridae; Pentapetalae; rosids; malvids; Brassicales; Brassicaceae; Camelineae; Arabidopsis	SPCS1_ARATH	128	E:8e-38	RecName: Full=Probable signal peptidase complex subunit 1;^Eukaryota; Viridiplantae; Streptophyta; Embryophyta; Tracheophyta; Spermatophyta; Magnoliophyta; eudicotyledons; Gunneridae; Pentapetalae; rosids; malvids; Brassicales; Brassicaceae; Camelineae; Arabidopsis	PF06645.12	SPC12	Microsomal signal peptidase 12 kDa subunit (SPC12)	ENOG410XV9J	signal peptidase	.	ExpAA=43.29^PredHel=2^Topology=o24-46i53-72o	.	GO:0045047|protein targeting to ER;GO:0006465|signal peptide processingGO:0006465|signal peptide processing	GO:0008233|peptidase activityGO:0008233|peptidase activity	GO:0030176|integral component of endoplasmic reticulum membrane;GO:0031090|organelle membrane;GO:0005787|signal peptidase complexGO:0005787|signal peptidase complex;GO:0016021|integral component of membrane	K12946|SPCS1; signal peptidase complex subunit 1 [EC:3.4.-.-]	map03060|Protein export
f2p60_1717_5729	gi|566189811|ref|XM_002314610.2|	3024	E:0	Populus trichocarpa N-carbamyl-L-amino acid hydrolase family protein (POPTR_0010s08660g) mRNA, complete cds	gi|566189812|ref|XP_002314646.2|	866	E:0	N-carbamyl-L-amino acid hydrolase family protein [Populus trichocarpa]	UAH_ARATH	683	E:0	RecName: Full=Ureidoglycolate hydrolase;^Eukaryota; Viridiplantae; Streptophyta; Embryophyta; Tracheophyta; Spermatophyta; Magnoliophyta; eudicotyledons; Gunneridae; Pentapetalae; rosids; malvids; Brassicales; Brassicaceae; Camelineae; Arabidopsis	UAH_ARATH	716	E:0	RecName: Full=Ureidoglycolate hydrolase;^Eukaryota; Viridiplantae; Streptophyta; Embryophyta; Tracheophyta; Spermatophyta; Magnoliophyta; eudicotyledons; Gunneridae; Pentapetalae; rosids; malvids; Brassicales; Brassicaceae; Camelineae; Arabidopsis	PF04389.16	Peptidase_M28	Peptidase family M28	COG0624	succinyl-diaminopimelate desuccinylase activity	.	ExpAA=18.98^PredHel=1^Topology=i12-31o	.	GO:0000256|allantoin catabolic process;GO:0006145|purine nucleobase catabolic process;GO:0010136|ureide catabolic processGO:0008152|metabolic process	GO:0046872|metal ion binding;GO:0004848|ureidoglycolate hydrolase activityGO:0016787|hydrolase activity	GO:0005783|endoplasmic reticulum	K18151|UAH; ureidoglycolate amidohydrolase [EC:3.5.1.116]	map01100|Metabolic pathways;map01120|Microbial metabolism in diverse environments;map00230|Purine metabolism
f2p60_1040_296752	gi|224101126|ref|XM_002312117.1|	1829	E:0	Populus trichocarpa Chlorophyll a-b binding protein CP29.3 (POPTR_0008s06720g) mRNA, complete cds	gi|224101127|ref|XP_002312153.1|	521	E:0	Chlorophyll a-b binding protein CP29.3 [Populus trichocarpa]	CB4C_ARATH	418	E:5e-145	RecName: Full=Chlorophyll a-b binding protein CP29.3, chloroplastic;^Eukaryota; Viridiplantae; Streptophyta; Embryophyta; Tracheophyta; Spermatophyta; Magnoliophyta; eudicotyledons; Gunneridae; Pentapetalae; rosids; malvids; Brassicales; Brassicaceae; Camelineae; Arabidopsis	CB4C_ARATH	418	E:3e-146	RecName: Full=Chlorophyll a-b binding protein CP29.3, chloroplastic;^Eukaryota; Viridiplantae; Streptophyta; Embryophyta; Tracheophyta; Spermatophyta; Magnoliophyta; eudicotyledons; Gunneridae; Pentapetalae; rosids; malvids; Brassicales; Brassicaceae; Camelineae; Arabidopsis	PF00504.20	Chloroa_b-bind	Chlorophyll A-B binding protein	ENOG410YYUX	Chlorophyll A-B binding protein	.	ExpAA=62.15^PredHel=3^Topology=i143-165o180-202i250-272o	.	GO:0009768|photosynthesis, light harvesting in photosystem I;GO:0018298|protein-chromophore linkage;GO:0009637|response to blue light;GO:0010218|response to far red light;GO:0010114|response to red light	GO:0016168|chlorophyll binding;GO:0046872|metal ion binding;GO:0031409|pigment binding	GO:0009507|chloroplast;GO:0009941|chloroplast envelope;GO:0009534|chloroplast thylakoid;GO:0009535|chloroplast thylakoid membrane;GO:0016021|integral component of membrane;GO:0016020|membrane;GO:0009522|photosystem I;GO:0009523|photosystem II;GO:0010287|plastoglobule;GO:0009579|thylakoid	K08915|LHCB4; light-harvesting complex II chlorophyll a/b binding protein 4	map00196|Photosynthesis - antenna proteins;map01100|Metabolic pathways
f2p60_2398_20613	gi|566166022|ref|XM_006384184.1|	3958	E:0	Populus trichocarpa amino acid transporter family protein (POPTR_0004s11020g) mRNA, complete cds	gi|566166023|ref|XP_006384246.1|	865	E:0	amino acid transporter family protein [Populus trichocarpa]	AVT6A_ARATH	644	E:0	RecName: Full=Amino acid transporter AVT6A {ECO:0000305};^Eukaryota; Viridiplantae; Streptophyta; Embryophyta; Tracheophyta; Spermatophyta; Magnoliophyta; eudicotyledons; Gunneridae; Pentapetalae; rosids; malvids; Brassicales; Brassicaceae; Camelineae; Arabidopsis	AVT6A_ARATH	686	E:0	RecName: Full=Amino acid transporter AVT6A {ECO:0000305};^Eukaryota; Viridiplantae; Streptophyta; Embryophyta; Tracheophyta; Spermatophyta; Magnoliophyta; eudicotyledons; Gunneridae; Pentapetalae; rosids; malvids; Brassicales; Brassicaceae; Camelineae; Arabidopsis	PF01490.17	Aa_trans	Transmembrane amino acid transporter protein	COG0814	amino acid transport	.	ExpAA=238.97^PredHel=11^Topology=i39-61o71-93i124-146o166-188i195-217o237-259i280-302o326-348i368-390o395-414i427-449o	.	GO:0003333|amino acid transmembrane transportGO:0003333|amino acid transmembrane transport	GO:0015171|amino acid transmembrane transporter activity	GO:0016021|integral component of membrane;GO:0005774|vacuolar membrane;GO:0005773|vacuole	K14207|SLC38A2, SNAT2; solute carrier family 38 (sodium-coupled neutral amino acid transporter), member 2	map04974|Protein digestion and absorption;map04724|Glutamatergic synapse;map04727|GABAergic synapse
f4p60_1574_24679	gi|118482306|gb|EF144870.1|	2684	E:0	Populus trichocarpa clone WS01119_D04 unknown mRNA	gi|118482307|gb|ABK93080.1|	731	E:0	unknown [Populus trichocarpa]	PPT1_CAEEL	168	E:5e-46	RecName: Full=Palmitoyl-protein thioesterase 1;^Eukaryota; Metazoa; Ecdysozoa; Nematoda; Chromadorea; Rhabditida; Rhabditoidea; Rhabditidae; Peloderinae; Caenorhabditis	PPT1_CAEEL	170	E:1e-47	RecName: Full=Palmitoyl-protein thioesterase 1;^Eukaryota; Metazoa; Ecdysozoa; Nematoda; Chromadorea; Rhabditida; Rhabditoidea; Rhabditidae; Peloderinae; Caenorhabditis	PF02089.14	Palm_thioest	Palmitoyl protein thioesterase	COG1075	Triacylglycerol Lipase	.	ExpAA=24.03^PredHel=1^Topology=i40-62o	.	GO:0044257|cellular protein catabolic process;GO:0007005|mitochondrion organization;GO:0018991|oviposition;GO:0009791|post-embryonic development;GO:0002084|protein depalmitoylation;GO:0006898|receptor-mediated endocytosis	GO:0008474|palmitoyl-(protein) hydrolase activityGO:0098599|palmitoyl hydrolase activity	GO:0005764|lysosome	K01074|PPT; palmitoyl-protein thioesterase [EC:3.1.2.22]	map00062|Fatty acid elongation;map01100|Metabolic pathways;map04142|Lysosome;map01212|Fatty acid metabolism
f3p60_1309_26798	gi|566201453|ref|XM_002319932.2|	2252	E:0	Populus trichocarpa peroxidase family protein (POPTR_0013s15250g) mRNA, complete cds	gi|566201454|ref|XP_002319968.2|	639	E:0	peroxidase family protein [Populus trichocarpa]	PER4_VITVI	488	E:3e-170	RecName: Full=Peroxidase 4 {ECO:0000250|UniProtKB:Q42578};^Eukaryota; Viridiplantae; Streptophyta; Embryophyta; Tracheophyta; Spermatophyta; Magnoliophyta; eudicotyledons; Gunneridae; Pentapetalae; rosids; Vitales; Vitaceae; Vitis	PER4_VITVI	507	E:7e-180	RecName: Full=Peroxidase 4 {ECO:0000250|UniProtKB:Q42578};^Eukaryota; Viridiplantae; Streptophyta; Embryophyta; Tracheophyta; Spermatophyta; Magnoliophyta; eudicotyledons; Gunneridae; Pentapetalae; rosids; Vitales; Vitaceae; Vitis	PF00141.22	peroxidase	Peroxidase	ENOG410YETZ	peroxidase	.	ExpAA=20.05^PredHel=1^Topology=i7-29o	.	GO:0042744|hydrogen peroxide catabolic process;GO:0006979|response to oxidative stressGO:0006979|response to oxidative stress;GO:0055114|oxidation-reduction process	GO:0020037|heme binding;GO:0046872|metal ion binding;GO:0004601|peroxidase activityGO:0004601|peroxidase activity;GO:0020037|heme binding	GO:0005576|extracellular region	K00430|E1.11.1.7; peroxidase [EC:1.11.1.7]	map01100|Metabolic pathways;map00940|Phenylpropanoid biosynthesis;map01110|Biosynthesis of secondary metabolites
f2p60_868_12530	gi|224054273|ref|XM_002298142.1|	1315	E:0	Populus trichocarpa chlorophyll A-B binding family protein (POPTR_0001s21740g) mRNA, complete cds	gi|224054274|ref|XP_002298178.1|	425	E:1e-147	chlorophyll A-B binding family protein [Populus trichocarpa]	CB4A_SOLLC	397	E:5e-138	RecName: Full=Chlorophyll a-b binding protein CP24 10A, chloroplastic;^Eukaryota; Viridiplantae; Streptophyta; Embryophyta; Tracheophyta; Spermatophyta; Magnoliophyta; eudicotyledons; Gunneridae; Pentapetalae; asterids; lamiids; Solanales; Solanaceae; Solanoideae; Solaneae; Solanum; Lycopersicon	CB4A_SOLLC	397	E:2e-139	RecName: Full=Chlorophyll a-b binding protein CP24 10A, chloroplastic;^Eukaryota; Viridiplantae; Streptophyta; Embryophyta; Tracheophyta; Spermatophyta; Magnoliophyta; eudicotyledons; Gunneridae; Pentapetalae; asterids; lamiids; Solanales; Solanaceae; Solanoideae; Solaneae; Solanum; Lycopersicon	PF00504.20	Chloroa_b-bind	Chlorophyll A-B binding protein	ENOG410ZGWX	Chlorophyll A-B binding protein	.	ExpAA=46.40^PredHel=2^Topology=i58-80o90-111i	.	GO:0009768|photosynthesis, light harvesting in photosystem I;GO:0018298|protein-chromophore linkage;GO:0009416|response to light stimulus	GO:0016168|chlorophyll binding;GO:0031409|pigment binding	GO:0009941|chloroplast envelope;GO:0009535|chloroplast thylakoid membrane;GO:0016021|integral component of membrane;GO:0009523|photosystem II;GO:0010287|plastoglobule	K08917|LHCB6; light-harvesting complex II chlorophyll a/b binding protein 6	map00196|Photosynthesis - antenna proteins;map01100|Metabolic pathways
f2p60_1464_7263	gi|743807352|ref|XM_011019666.1|	2303	E:0	PREDICTED: Populus euphratica acidic mammalian chitinase-like (LOC105121138), transcript variant X1, mRNA	gi|566215411|ref|XP_006372127.1|	708	E:0	hypothetical protein POPTR_0018s12000g [Populus trichocarpa]	CHIA_RAT	155	E:2e-40	RecName: Full=Acidic mammalian chitinase;^Eukaryota; Metazoa; Chordata; Craniata; Vertebrata; Euteleostomi; Mammalia; Eutheria; Euarchontoglires; Glires; Rodentia; Myomorpha; Muroidea; Muridae; Murinae; Rattus	CHIA_RAT	173	E:2e-47	RecName: Full=Acidic mammalian chitinase;^Eukaryota; Metazoa; Chordata; Craniata; Vertebrata; Euteleostomi; Mammalia; Eutheria; Euarchontoglires; Glires; Rodentia; Myomorpha; Muroidea; Muridae; Murinae; Rattus	PF00704.27	Glyco_hydro_18	Glycosyl hydrolases family 18	COG3325	chitinase	.	ExpAA=27.56^PredHel=1^Topology=i12-31o	.	GO:0006915|apoptotic process;GO:0006032|chitin catabolic process;GO:0002376|immune system process;GO:0000272|polysaccharide catabolic process;GO:0090197|positive regulation of chemokine secretion;GO:0002532|production of molecular mediator involved in inflammatory responseGO:0005975|carbohydrate metabolic process	GO:0008061|chitin binding;GO:0004568|chitinase activity	GO:0005737|cytoplasm;GO:0005576|extracellular region;GO:0005615|extracellular space	K01183|E3.2.1.14; chitinase [EC:3.2.1.14]	map01100|Metabolic pathways;map00520|Amino sugar and nucleotide sugar metabolism;map00500|Starch and sucrose metabolism
f2p44_1781_23308	gi|743846912|ref|XM_011029551.1|	2915	E:0	PREDICTED: Populus euphratica allantoinase (LOC105128047), transcript variant X2, mRNA	gi|566164850|ref|XP_002305806.2|	880	E:0	hypothetical protein POPTR_0004s04190g [Populus trichocarpa]	ALN_ARATH	670	E:0	RecName: Full=Allantoinase;^Eukaryota; Viridiplantae; Streptophyta; Embryophyta; Tracheophyta; Spermatophyta; Magnoliophyta; eudicotyledons; Gunneridae; Pentapetalae; rosids; malvids; Brassicales; Brassicaceae; Camelineae; Arabidopsis	ALN_ARATH	741	E:0	RecName: Full=Allantoinase;^Eukaryota; Viridiplantae; Streptophyta; Embryophyta; Tracheophyta; Spermatophyta; Magnoliophyta; eudicotyledons; Gunneridae; Pentapetalae; rosids; malvids; Brassicales; Brassicaceae; Camelineae; Arabidopsis	PF01979.19	Amidohydro_1	Amidohydrolase family	COG0044	Dihydroorotase	.	ExpAA=19.13^PredHel=1^Topology=i13-31o	.	GO:0000256|allantoin catabolic process;GO:0006995|cellular response to nitrogen starvation;GO:0006145|purine nucleobase catabolic process;GO:0010136|ureide catabolic process	GO:0004038|allantoinase activity;GO:0050897|cobalt ion binding;GO:0008270|zinc ion bindingGO:0016787|hydrolase activity	GO:0005783|endoplasmic reticulum	K01466|allB; allantoinase [EC:3.5.2.5]	map01100|Metabolic pathways;map01120|Microbial metabolism in diverse environments;map00230|Purine metabolism
f2p60_2893_19473	gi|743799536|ref|XM_011015083.1|	4758	E:0	PREDICTED: Populus euphratica beta-1,3-galactosyltransferase 15-like (LOC105117419), transcript variant X1, mRNA	gi|566191332|ref|XP_002316134.2|	1313	E:0	galactosyltransferase family protein [Populus trichocarpa]	B3GTF_ARATH	856	E:0	RecName: Full=Beta-1,3-galactosyltransferase GALT1 {ECO:0000305};^Eukaryota; Viridiplantae; Streptophyta; Embryophyta; Tracheophyta; Spermatophyta; Magnoliophyta; eudicotyledons; Gunneridae; Pentapetalae; rosids; malvids; Brassicales; Brassicaceae; Camelineae; Arabidopsis	B3GTF_ARATH	856	E:0	RecName: Full=Beta-1,3-galactosyltransferase GALT1 {ECO:0000305};^Eukaryota; Viridiplantae; Streptophyta; Embryophyta; Tracheophyta; Spermatophyta; Magnoliophyta; eudicotyledons; Gunneridae; Pentapetalae; rosids; malvids; Brassicales; Brassicaceae; Camelineae; Arabidopsis	PF00337.21	Gal-bind_lectin	Galactoside-binding lectin	ENOG410ZZ1B	UDP-GlcNAc beta-Gal beta-1,3-N-acetylglucosaminyltransferase	.	ExpAA=19.86^PredHel=1^Topology=i5-24o	.	GO:0010493|Lewis a epitope biosynthetic process;GO:0006486|protein glycosylationGO:0006486|protein glycosylation	GO:0030246|carbohydrate binding;GO:0010488|UDP-galactose:N-glycan beta-1,3-galactosyltransferase activityGO:0030246|carbohydrate binding;GO:0008378|galactosyltransferase activity	GO:0005794|Golgi apparatus;GO:0000139|Golgi membrane;GO:0016021|integral component of membraneGO:0016020|membrane	K14413|GALT1; beta-1,3-galactosyltransferase [EC:2.4.1.-]	map00513|Various types of N-glycan biosynthesis
f7p60_1816_23223	gi|566236085|ref|XM_002325445.2|	3070	E:0	Populus trichocarpa hypothetical protein (POPTR_0019s08450g) mRNA, complete cds	gi|566236086|ref|XP_002325481.2|	882	E:0	hypothetical protein POPTR_0019s08450g [Populus trichocarpa]	AGAL3_ARATH	686	E:0	RecName: Full=Alpha-galactosidase 3 {ECO:0000303|PubMed:15034167};^Eukaryota; Viridiplantae; Streptophyta; Embryophyta; Tracheophyta; Spermatophyta; Magnoliophyta; eudicotyledons; Gunneridae; Pentapetalae; rosids; malvids; Brassicales; Brassicaceae; Camelineae; Arabidopsis	AGAL3_ARATH	687	E:0	RecName: Full=Alpha-galactosidase 3 {ECO:0000303|PubMed:15034167};^Eukaryota; Viridiplantae; Streptophyta; Embryophyta; Tracheophyta; Spermatophyta; Magnoliophyta; eudicotyledons; Gunneridae; Pentapetalae; rosids; malvids; Brassicales; Brassicaceae; Camelineae; Arabidopsis	PF16499.4	Melibiase_2	Alpha galactosidase A	ENOG410XPF1	alpha-galactosidase	.	ExpAA=22.17^PredHel=1^Topology=i12-34o	.	GO:0005975|carbohydrate metabolic process;GO:0071555|cell wall organizationGO:0005975|carbohydrate metabolic process	GO:0052692|raffinose alpha-galactosidase activityGO:0004553|hydrolase activity, hydrolyzing O-glycosyl compounds;GO:0004557|alpha-galactosidase activity	GO:0048046|apoplast;GO:0009505|plant-type cell wall;GO:0005773|vacuole	K07407|E3.2.1.22B, galA, rafA; alpha-galactosidase [EC:3.2.1.22]	map00561|Glycerolipid metabolism;map00603|Glycosphingolipid biosynthesis - globo series;map00600|Sphingolipid metabolism;map00052|Galactose metabolism
f4p60_867_31583	gi|566169829|ref|XM_002306213.2|	1386	E:0	Populus trichocarpa hypothetical protein (POPTR_0005s06420g) mRNA, complete cds	gi|224080971|ref|XP_002306249.1|	164	E:2e-67	hypothetical protein POPTR_0005s06420g [Populus trichocarpa]	PSAN_ARATH	157	E:1e-50	RecName: Full=Photosystem I reaction center subunit N, chloroplastic;^Eukaryota; Viridiplantae; Streptophyta; Embryophyta; Tracheophyta; Spermatophyta; Magnoliophyta; eudicotyledons; Gunneridae; Pentapetalae; rosids; malvids; Brassicales; Brassicaceae; Camelineae; Arabidopsis	PSAN_ARATH	97.1	E:9e-25	RecName: Full=Photosystem I reaction center subunit N, chloroplastic;^Eukaryota; Viridiplantae; Streptophyta; Embryophyta; Tracheophyta; Spermatophyta; Magnoliophyta; eudicotyledons; Gunneridae; Pentapetalae; rosids; malvids; Brassicales; Brassicaceae; Camelineae; Arabidopsis	PF05479.10	PsaN	Photosystem I reaction centre subunit N (PSAN or PSI-N)	ENOG411281Y	Photosystem I reaction center subunit	.	ExpAA=22.70^PredHel=1^Topology=i66-88o	.	GO:0015979|photosynthesisGO:0015979|photosynthesis	GO:0019904|protein domain specific binding	GO:0009535|chloroplast thylakoid membrane;GO:0009522|photosystem IGO:0009522|photosystem I	K02701|psaN; photosystem I subunit PsaN	map01100|Metabolic pathways;map00195|Photosynthesis
f4p60_1800_23192	gi|566215234|ref|XM_002324474.2|	2990	E:0	Populus trichocarpa UDP-D-GLUCURONATE 4-EPIMERASE 1 family protein (POPTR_0018s10940g) mRNA, complete cds	gi|224142327|ref|XP_002324510.1|	822	E:0	UDP-D-GLUCURONATE 4-EPIMERASE 1 family protein [Populus trichocarpa]	GAE1_ARATH	750	E:0	RecName: Full=UDP-glucuronate 4-epimerase 1;^Eukaryota; Viridiplantae; Streptophyta; Embryophyta; Tracheophyta; Spermatophyta; Magnoliophyta; eudicotyledons; Gunneridae; Pentapetalae; rosids; malvids; Brassicales; Brassicaceae; Camelineae; Arabidopsis	GAE1_ARATH	773	E:0	RecName: Full=UDP-glucuronate 4-epimerase 1;^Eukaryota; Viridiplantae; Streptophyta; Embryophyta; Tracheophyta; Spermatophyta; Magnoliophyta; eudicotyledons; Gunneridae; Pentapetalae; rosids; malvids; Brassicales; Brassicaceae; Camelineae; Arabidopsis	PF04321.16	RmlD_sub_bind	RmlD substrate binding domain	COG0451	Nad-dependent epimerase dehydratase	.	ExpAA=42.77^PredHel=1^Topology=i78-100o	.	GO:0050832|defense response to fungus;GO:0050829|defense response to Gram-negative bacterium;GO:0033481|galacturonate biosynthetic processGO:0006694|steroid biosynthetic process;GO:0055114|oxidation-reduction process	GO:0050378|UDP-glucuronate 4-epimerase activityGO:0003824|catalytic activity;GO:0050662|coenzyme binding;GO:0003854|3-beta-hydroxy-delta5-steroid dehydrogenase activity;GO:0016616|oxidoreductase activity, acting on the CH-OH group of donors, NAD or NADP as acceptor	GO:0005768|endosome;GO:0005794|Golgi apparatus;GO:0032580|Golgi cisterna membrane;GO:0016021|integral component of membrane;GO:0005802|trans-Golgi network	K08679|E5.1.3.6; UDP-glucuronate 4-epimerase [EC:5.1.3.6]	map01100|Metabolic pathways;map00500|Starch and sucrose metabolism;map00520|Amino sugar and nucleotide sugar metabolism
f2p60_2609_20102	gi|566189789|ref|XM_002315681.2|	2948	E:0	Populus trichocarpa ethylene receptor family protein (POPTR_0010s08510g) mRNA, complete cds	gi|224111018|ref|XP_002315717.1|	854	E:0	ethylene receptor family protein [Populus trichocarpa]	ETR2_ARATH	496	E:4e-161	RecName: Full=Ethylene receptor 2;^Eukaryota; Viridiplantae; Streptophyta; Embryophyta; Tracheophyta; Spermatophyta; Magnoliophyta; eudicotyledons; Gunneridae; Pentapetalae; rosids; malvids; Brassicales; Brassicaceae; Camelineae; Arabidopsis	ETR2_ARATH	529	E:3e-176	RecName: Full=Ethylene receptor 2;^Eukaryota; Viridiplantae; Streptophyta; Embryophyta; Tracheophyta; Spermatophyta; Magnoliophyta; eudicotyledons; Gunneridae; Pentapetalae; rosids; malvids; Brassicales; Brassicaceae; Camelineae; Arabidopsis	PF00512.24	HisKA	His Kinase A (phospho-acceptor) domain	COG0642	Histidine kinase	.	ExpAA=81.48^PredHel=4^Topology=o4-21i52-69o79-101i114-136o	.	GO:0010105|negative regulation of ethylene-activated signaling pathwayGO:0007165|signal transduction;GO:0000160|phosphorelay signal transduction system	GO:0005524|ATP binding;GO:0051740|ethylene binding;GO:0038199|ethylene receptor activity;GO:0046872|metal ion binding;GO:0000155|phosphorelay sensor kinase activity;GO:0004674|protein serine/threonine kinase activity;GO:0004872|receptor activityGO:0000155|phosphorelay sensor kinase activity	GO:0005783|endoplasmic reticulum;GO:0005789|endoplasmic reticulum membrane;GO:0016021|integral component of membrane	K14509|ETR, ERS; ethylene receptor [EC:2.7.13.-]	map04075|Plant hormone signal transduction
f2p60_1452_7388	gi|566173397|ref|XM_002307717.2|	2466	E:0	Populus trichocarpa putative sterol-C-methyltransferase family protein (POPTR_0005s26710g) mRNA, complete cds	gi|224085956|ref|XP_002307753.1|	739	E:0	putative sterol-C-methyltransferase family protein [Populus trichocarpa]	SMT2_ARATH	660	E:0	RecName: Full=24-methylenesterol C-methyltransferase 2;^Eukaryota; Viridiplantae; Streptophyta; Embryophyta; Tracheophyta; Spermatophyta; Magnoliophyta; eudicotyledons; Gunneridae; Pentapetalae; rosids; malvids; Brassicales; Brassicaceae; Camelineae; Arabidopsis	SMT2_ARATH	672	E:0	RecName: Full=24-methylenesterol C-methyltransferase 2;^Eukaryota; Viridiplantae; Streptophyta; Embryophyta; Tracheophyta; Spermatophyta; Magnoliophyta; eudicotyledons; Gunneridae; Pentapetalae; rosids; malvids; Brassicales; Brassicaceae; Camelineae; Arabidopsis	PF02353.19	CMAS	Mycolic acid cyclopropane synthetase	ENOG410XP5G	Methyltransferase	.	ExpAA=32.73^PredHel=1^Topology=o24-46i	.	GO:0009825|multidimensional cell growth;GO:0032876|negative regulation of DNA endoreduplication;GO:0007389|pattern specification process;GO:0016126|sterol biosynthetic process;GO:0010051|xylem and phloem pattern formationGO:0008152|metabolic process;GO:0006694|steroid biosynthetic process	GO:0030797|24-methylenesterol C-methyltransferase activity;GO:0008757|S-adenosylmethionine-dependent methyltransferase activityGO:0008168|methyltransferase activity	GO:0005783|endoplasmic reticulum;GO:0005794|Golgi apparatus	K08242|E2.1.1.143; 24-methylenesterol C-methyltransferase [EC:2.1.1.143]	map00100|Steroid biosynthesis;map01110|Biosynthesis of secondary metabolites
f2p60_1575_6634	gi|566240509|ref|XM_002325514.2|	2715	E:0	Populus trichocarpa thioredoxin family protein (POPTR_0019s11190g) mRNA, complete cds	gi|566240510|ref|XP_002325550.2|	801	E:0	thioredoxin family protein [Populus trichocarpa]	PDI52_ARATH	554	E:0	RecName: Full=Protein disulfide-isomerase 5-2;^Eukaryota; Viridiplantae; Streptophyta; Embryophyta; Tracheophyta; Spermatophyta; Magnoliophyta; eudicotyledons; Gunneridae; Pentapetalae; rosids; malvids; Brassicales; Brassicaceae; Camelineae; Arabidopsis	PDI52_ARATH	555	E:0	RecName: Full=Protein disulfide-isomerase 5-2;^Eukaryota; Viridiplantae; Streptophyta; Embryophyta; Tracheophyta; Spermatophyta; Magnoliophyta; eudicotyledons; Gunneridae; Pentapetalae; rosids; malvids; Brassicales; Brassicaceae; Camelineae; Arabidopsis	PF00085.19	Thioredoxin	Thioredoxin	COG0526	Thioredoxin	.	ExpAA=26.35^PredHel=1^Topology=o384-406i	.	GO:0045454|cell redox homeostasis;GO:0006457|protein folding;GO:0034976|response to endoplasmic reticulum stressGO:0045454|cell redox homeostasis	GO:0003756|protein disulfide isomerase activity	GO:0005783|endoplasmic reticulum;GO:0016021|integral component of membrane;GO:0009505|plant-type cell wall;GO:0009506|plasmodesma;GO:0005774|vacuolar membrane	K09580|PDIA1, P4HB; protein disulfide-isomerase A1 [EC:5.3.4.1]	map04141|Protein processing in endoplasmic reticulum
f3p60_1391_26032	gi|566199980|ref|XM_002319741.2|	2396	E:0	Populus trichocarpa hypothetical protein (POPTR_0013s07440g) mRNA, complete cds	gi|566199981|ref|XP_002319777.2|	691	E:0	hypothetical protein POPTR_0013s07440g [Populus trichocarpa]	GTOMC_ORYSJ	472	E:4e-163	RecName: Full=Probable tocopherol O-methyltransferase, chloroplastic;^Eukaryota; Viridiplantae; Streptophyta; Embryophyta; Tracheophyta; Spermatophyta; Magnoliophyta; Liliopsida; Poales; Poaceae; BOP clade; Oryzoideae; Oryzeae; Oryzinae; Oryza	GTOMC_ORYSJ	473	E:4e-165	RecName: Full=Probable tocopherol O-methyltransferase, chloroplastic;^Eukaryota; Viridiplantae; Streptophyta; Embryophyta; Tracheophyta; Spermatophyta; Magnoliophyta; Liliopsida; Poales; Poaceae; BOP clade; Oryzoideae; Oryzeae; Oryzinae; Oryza	PF02353.19	CMAS	Mycolic acid cyclopropane synthetase	ENOG410XP5G	Methyltransferase	.	ExpAA=20.49^PredHel=1^Topology=i13-35o	.	GO:0010189|vitamin E biosynthetic processGO:0008152|metabolic process	GO:0051741|2-methyl-6-phytyl-1,4-benzoquinone methyltransferase activity;GO:0050342|tocopherol O-methyltransferase activityGO:0008168|methyltransferase activity	GO:0009507|chloroplast	K05928|E2.1.1.95; tocopherol O-methyltransferase [EC:2.1.1.95]	map00130|Ubiquinone and other terpenoid-quinone biosynthesis;map01100|Metabolic pathways;map01110|Biosynthesis of secondary metabolites
f2p39_1111_10188	gi|566153713|ref|XM_006370050.1|	1893	E:0	Populus trichocarpa hypothetical protein (POPTR_0001s39590g) mRNA, complete cds	gi|566153712|ref|XP_006370111.1|	350	E:9e-114	transport protein sec61 [Populus trichocarpa]	SC61A_DICDI	255	E:2e-78	RecName: Full=Protein transport protein Sec61 subunit alpha;^Eukaryota; Amoebozoa; Mycetozoa; Dictyosteliida; Dictyostelium	SC61A_DICDI	255	E:2e-81	RecName: Full=Protein transport protein Sec61 subunit alpha;^Eukaryota; Amoebozoa; Mycetozoa; Dictyosteliida; Dictyostelium	PF00344.19	SecY	SecY translocase	COG0201	The central subunit of the protein translocation channel SecYEG. Consists of two halves formed by TMs 1-5 and 6-10. These two domains form a lateral gate at the front which open onto the bilayer between TMs 2 and 7, and are clamped together by SecE at the back. The channel is closed by both a pore ring composed of hydrophobic SecY resides and a short helix (helix 2A) on the extracellular side of …	.	ExpAA=64.91^PredHel=2^Topology=i109-131o135-154i	.	GO:0031204|posttranslational protein targeting to membrane, translocationGO:0015031|protein transport	GO:0015450|P-P-bond-hydrolysis-driven protein transmembrane transporter activity	GO:0005783|endoplasmic reticulum;GO:0005789|endoplasmic reticulum membrane;GO:0016021|integral component of membraneGO:0016020|membrane	K10956|SEC61A; protein transport protein SEC61 subunit alpha	map04141|Protein processing in endoplasmic reticulum;map05110|Vibrio cholerae infection;map04145|Phagosome;map03060|Protein export
f2p60_1473_25352	gi|566182999|ref|XM_002312210.2|	2545	E:0	Populus trichocarpa nucleoside phosphatase family protein (POPTR_0008s08600g) mRNA, complete cds	gi|224101353|ref|XP_002312246.1|	713	E:0	nucleoside phosphatase family protein [Populus trichocarpa]	APY6_ARATH	450	E:3e-151	RecName: Full=Probable apyrase 6;^Eukaryota; Viridiplantae; Streptophyta; Embryophyta; Tracheophyta; Spermatophyta; Magnoliophyta; eudicotyledons; Gunneridae; Pentapetalae; rosids; malvids; Brassicales; Brassicaceae; Camelineae; Arabidopsis	APY6_ARATH	450	E:1e-153	RecName: Full=Probable apyrase 6;^Eukaryota; Viridiplantae; Streptophyta; Embryophyta; Tracheophyta; Spermatophyta; Magnoliophyta; eudicotyledons; Gunneridae; Pentapetalae; rosids; malvids; Brassicales; Brassicaceae; Camelineae; Arabidopsis	PF01150.16	GDA1_CD39	GDA1/CD39 (nucleoside phosphatase) family	COG5371	Ectonucleoside triphosphate diphosphohydrolase	.	ExpAA=24.02^PredHel=1^Topology=o299-318i	.	GO:0009901|anther dehiscence;GO:0010584|pollen exine formation	GO:0102490|8-oxo-dGTP phosphohydrolase activity;GO:0005524|ATP bindingGO:0016787|hydrolase activity	GO:0030659|cytoplasmic vesicle membrane;GO:0016021|integral component of membrane	K01510|ENTPD1_3_8; apyrase [EC:3.6.1.5]	map05169|Epstein-Barr virus infection;map00240|Pyrimidine metabolism;map00230|Purine metabolism
f5p60_1831_22996	gi|566164847|ref|XM_006383963.1|	3162	E:0	Populus trichocarpa hypothetical protein (POPTR_0004s04190g) mRNA, complete cds	gi|566164848|ref|XP_006384025.1|	793	E:0	hypothetical protein POPTR_0004s04190g [Populus trichocarpa]	ALN_ARATH	508	E:1e-172	RecName: Full=Allantoinase;^Eukaryota; Viridiplantae; Streptophyta; Embryophyta; Tracheophyta; Spermatophyta; Magnoliophyta; eudicotyledons; Gunneridae; Pentapetalae; rosids; malvids; Brassicales; Brassicaceae; Camelineae; Arabidopsis	ALN_ARATH	578	E:0	RecName: Full=Allantoinase;^Eukaryota; Viridiplantae; Streptophyta; Embryophyta; Tracheophyta; Spermatophyta; Magnoliophyta; eudicotyledons; Gunneridae; Pentapetalae; rosids; malvids; Brassicales; Brassicaceae; Camelineae; Arabidopsis	PF01979.19	Amidohydro_1	Amidohydrolase family	COG0044	Dihydroorotase	.	ExpAA=18.79^PredHel=1^Topology=i7-24o	.	GO:0000256|allantoin catabolic process;GO:0006995|cellular response to nitrogen starvation;GO:0006145|purine nucleobase catabolic process;GO:0010136|ureide catabolic process	GO:0004038|allantoinase activity;GO:0050897|cobalt ion binding;GO:0008270|zinc ion bindingGO:0016787|hydrolase activity	GO:0005783|endoplasmic reticulum	K01466|allB; allantoinase [EC:3.5.2.5]	map01100|Metabolic pathways;map01120|Microbial metabolism in diverse environments;map00230|Purine metabolism
f3p60_1996_4303	gi|743786323|ref|XM_011029116.1|	3367	E:0	PREDICTED: Populus euphratica 3-ketoacyl-CoA synthase 11-like (LOC105127721), mRNA	gi|224102139|ref|XP_002312562.1|	1051	E:0	hypothetical protein POPTR_0008s15990g [Populus trichocarpa]	KCS11_ARATH	803	E:0	RecName: Full=3-ketoacyl-CoA synthase 11 {ECO:0000303|PubMed:18465198};^Eukaryota; Viridiplantae; Streptophyta; Embryophyta; Tracheophyta; Spermatophyta; Magnoliophyta; eudicotyledons; Gunneridae; Pentapetalae; rosids; malvids; Brassicales; Brassicaceae; Camelineae; Arabidopsis	KCS11_ARATH	823	E:0	RecName: Full=3-ketoacyl-CoA synthase 11 {ECO:0000303|PubMed:18465198};^Eukaryota; Viridiplantae; Streptophyta; Embryophyta; Tracheophyta; Spermatophyta; Magnoliophyta; eudicotyledons; Gunneridae; Pentapetalae; rosids; malvids; Brassicales; Brassicaceae; Camelineae; Arabidopsis	PF08392.11	FAE1_CUT1_RppA	FAE1/Type III polyketide synthase-like protein	ENOG410Y5VH	3-ketoacyl-coa synthase	.	ExpAA=58.48^PredHel=2^Topology=o40-62i82-104o	.	GO:0006633|fatty acid biosynthetic process;GO:0009409|response to cold;GO:0009416|response to light stimulusGO:0006633|fatty acid biosynthetic process	GO:0102336|3-oxo-arachidoyl-CoA synthase activity;GO:0102337|3-oxo-cerotoyl-CoA synthase activity;GO:0102338|3-oxo-lignoceronyl-CoA synthase activityGO:0016747|transferase activity, transferring acyl groups other than amino-acyl groups	GO:0016021|integral component of membraneGO:0016020|membrane	K15397|KCS; 3-ketoacyl-CoA synthase [EC:2.3.1.199]	map00062|Fatty acid elongation;map01110|Biosynthesis of secondary metabolites
f2p60_988_30169	gi|743941641|ref|XM_011017010.1|	1465	E:0	PREDICTED: Populus euphratica photosystem I reaction center subunit XI, chloroplastic-like (LOC105118949), mRNA	gi|566159703|ref|XP_002303024.2|	387	E:1e-132	Photosystem I reaction center subunit XI family protein, partial [Populus trichocarpa]	PSAL_ARATH	288	E:3e-95	RecName: Full=Photosystem I reaction center subunit XI, chloroplastic;^Eukaryota; Viridiplantae; Streptophyta; Embryophyta; Tracheophyta; Spermatophyta; Magnoliophyta; eudicotyledons; Gunneridae; Pentapetalae; rosids; malvids; Brassicales; Brassicaceae; Camelineae; Arabidopsis	PSAL_ARATH	303	E:9e-103	RecName: Full=Photosystem I reaction center subunit XI, chloroplastic;^Eukaryota; Viridiplantae; Streptophyta; Embryophyta; Tracheophyta; Spermatophyta; Magnoliophyta; eudicotyledons; Gunneridae; Pentapetalae; rosids; malvids; Brassicales; Brassicaceae; Camelineae; Arabidopsis	PF02605.14	PsaL	Photosystem I reaction centre subunit XI	ENOG4111KFU	photosystem I reaction center	.	ExpAA=51.62^PredHel=2^Topology=i131-153o189-211i	.	GO:0015979|photosynthesisGO:0015979|photosynthesis	GO:0019904|protein domain specific binding	GO:0009507|chloroplast;GO:0009941|chloroplast envelope;GO:0031969|chloroplast membrane;GO:0009534|chloroplast thylakoid;GO:0009535|chloroplast thylakoid membrane;GO:0016021|integral component of membrane;GO:0016020|membrane;GO:0009538|photosystem I reaction center;GO:0010287|plastoglobule;GO:0009579|thylakoidGO:0009522|photosystem I;GO:0009538|photosystem I reaction center	K02699|psaL; photosystem I subunit XI	map01100|Metabolic pathways;map00195|Photosynthesis
f4p60_3048_1582	gi|743882804|ref|XM_011038556.1|	5144	E:0	PREDICTED: Populus euphratica respiratory burst oxidase homolog protein B (LOC105134217), transcript variant X1, mRNA	gi|743882805|ref|XP_011036858.1|	1709	E:0	PREDICTED: respiratory burst oxidase homolog protein B [Populus euphratica]	RBOHB_SOLTU	1402	E:0	RecName: Full=Respiratory burst oxidase homolog protein B;^Eukaryota; Viridiplantae; Streptophyta; Embryophyta; Tracheophyta; Spermatophyta; Magnoliophyta; eudicotyledons; Gunneridae; Pentapetalae; asterids; lamiids; Solanales; Solanaceae; Solanoideae; Solaneae; Solanum	RBOHB_SOLTU	1454	E:0	RecName: Full=Respiratory burst oxidase homolog protein B;^Eukaryota; Viridiplantae; Streptophyta; Embryophyta; Tracheophyta; Spermatophyta; Magnoliophyta; eudicotyledons; Gunneridae; Pentapetalae; asterids; lamiids; Solanales; Solanaceae; Solanoideae; Solaneae; Solanum	PF08414.9	NADPH_Ox	Respiratory burst NADPH oxidase	ENOG410XNZY	NADPH Oxidase	.	ExpAA=115.30^PredHel=4^Topology=o337-356i477-499o519-541i701-718o	.	GO:0055114|oxidation-reduction process	GO:0005509|calcium ion binding;GO:0016174|NAD(P)H oxidase activity;GO:0004601|peroxidase activityGO:0004601|peroxidase activity;GO:0050664|oxidoreductase activity, acting on NAD(P)H, oxygen as acceptor;GO:0005509|calcium ion binding;GO:0016491|oxidoreductase activity	GO:0016021|integral component of membrane;GO:0005886|plasma membrane	K13447|RBOH; respiratory burst oxidase [EC:1.6.3.- 1.11.1.-]	map04626|Plant-pathogen interaction
f2p30_2187_21268	gi|566215027|ref|XM_002324995.2|	3764	E:0	Populus trichocarpa Hexokinase 1 family protein (POPTR_0018s09560g) mRNA, complete cds	gi|224143653|ref|XP_002325031.1|	895	E:0	Hexokinase 1 family protein [Populus trichocarpa]	HXK1_ARATH	743	E:0	RecName: Full=Hexokinase-1;^Eukaryota; Viridiplantae; Streptophyta; Embryophyta; Tracheophyta; Spermatophyta; Magnoliophyta; eudicotyledons; Gunneridae; Pentapetalae; rosids; malvids; Brassicales; Brassicaceae; Camelineae; Arabidopsis	HXK1_ARATH	805	E:0	RecName: Full=Hexokinase-1;^Eukaryota; Viridiplantae; Streptophyta; Embryophyta; Tracheophyta; Spermatophyta; Magnoliophyta; eudicotyledons; Gunneridae; Pentapetalae; rosids; malvids; Brassicales; Brassicaceae; Camelineae; Arabidopsis	PF00349.20	Hexokinase_1	Hexokinase	COG5026	hexokinase	.	ExpAA=21.78^PredHel=1^Topology=i5-24o	.	GO:0010255|glucose mediated signaling pathway;GO:0006096|glycolytic process;GO:0019320|hexose catabolic process;GO:0012501|programmed cell death;GO:0090332|stomatal closure;GO:0010182|sugar mediated signaling pathway;GO:0010148|transpirationGO:0005975|carbohydrate metabolic process	GO:0005524|ATP binding;GO:0008865|fructokinase activity;GO:0004340|glucokinase activity;GO:0005536|glucose binding;GO:0004396|hexokinase activity;GO:0019158|mannokinase activity;GO:0008270|zinc ion bindingGO:0005524|ATP binding;GO:0016773|phosphotransferase activity, alcohol group as acceptor	GO:0005829|cytosol;GO:0016021|integral component of membrane;GO:0016020|membrane;GO:0005741|mitochondrial outer membrane;GO:0005739|mitochondrion;GO:0005634|nucleus;GO:0009536|plastid;GO:0005774|vacuolar membrane;GO:0005773|vacuole	K00844|HK; hexokinase [EC:2.7.1.1]	map04066|HIF-1 signaling pathway;map01200|Carbon metabolism;map00010|Glycolysis / Gluconeogenesis;map00500|Starch and sucrose metabolism;map04930|Type II diabetes mellitus;map00524|Butirosin and neomycin biosynthesis;map00521|Streptomycin biosynthesis;map00520|Amino sugar and nucleotide sugar metabolism;map04973|Carbohydrate digestion and absorption;map05230|Central carbon metabolism in cancer;ma…
f6p60_1404_7812	gi|743821608|ref|XM_011023161.1|	2255	E:0	PREDICTED: Populus euphratica syntaxin-132-like (LOC105123533), mRNA	gi|224146010|ref|XP_002325846.1|	520	E:0	syntaxin 131 family protein [Populus trichocarpa]	SY131_ARATH	391	E:3e-132	RecName: Full=Putative syntaxin-131;^Eukaryota; Viridiplantae; Streptophyta; Embryophyta; Tracheophyta; Spermatophyta; Magnoliophyta; eudicotyledons; Gunneridae; Pentapetalae; rosids; malvids; Brassicales; Brassicaceae; Camelineae; Arabidopsis	SY131_ARATH	449	E:1e-157	RecName: Full=Putative syntaxin-131;^Eukaryota; Viridiplantae; Streptophyta; Embryophyta; Tracheophyta; Spermatophyta; Magnoliophyta; eudicotyledons; Gunneridae; Pentapetalae; rosids; malvids; Brassicales; Brassicaceae; Camelineae; Arabidopsis	PF00804.24	Syntaxin	Syntaxin	COG5074	SYNtaxin	.	ExpAA=20.81^PredHel=1^Topology=i275-294o	.	GO:0006887|exocytosis;GO:0006886|intracellular protein transport;GO:0048278|vesicle docking;GO:0006906|vesicle fusion	GO:0005484|SNAP receptor activity;GO:0000149|SNARE binding	GO:0012505|endomembrane system;GO:0016021|integral component of membrane;GO:0005886|plasma membrane;GO:0031201|SNARE complexGO:0016020|membrane	K08486|STX1B_2_3; syntaxin 1B/2/3	map04721|Synaptic vesicle cycle;map04130|SNARE interactions in vesicular transport
f2p55_674_13323	gi|566176370|ref|XM_006381549.1|	1114	E:0	Populus trichocarpa hypothetical protein (POPTR_0006s14310g) mRNA, complete cds	gi|566176371|ref|XP_006381611.1|	213	E:5e-67	hypothetical protein POPTR_0006s14310g [Populus trichocarpa]	COPT5_ARATH	122	E:3e-36	RecName: Full=Copper transporter 5;^Eukaryota; Viridiplantae; Streptophyta; Embryophyta; Tracheophyta; Spermatophyta; Magnoliophyta; eudicotyledons; Gunneridae; Pentapetalae; rosids; malvids; Brassicales; Brassicaceae; Camelineae; Arabidopsis	COPT5_ARATH	122	E:4e-34	RecName: Full=Copper transporter 5;^Eukaryota; Viridiplantae; Streptophyta; Embryophyta; Tracheophyta; Spermatophyta; Magnoliophyta; eudicotyledons; Gunneridae; Pentapetalae; rosids; malvids; Brassicales; Brassicaceae; Camelineae; Arabidopsis	PF04145.14	Ctr	Ctr copper transporter family	ENOG4111I8D	Solute carrier family 31 copper transporters member	.	ExpAA=59.69^PredHel=3^Topology=o33-55i95-114o118-135i	.	GO:0015680|intracellular copper ion transport;GO:0009737|response to abscisic acidGO:0035434|copper ion transmembrane transport	GO:0005375|copper ion transmembrane transporter activityGO:0005375|copper ion transmembrane transporter activity	GO:0005794|Golgi apparatus;GO:0016021|integral component of membrane;GO:0005770|late endosome;GO:0009506|plasmodesma;GO:0005774|vacuolar membrane;GO:0005773|vacuoleGO:0016021|integral component of membrane	K14686|SLC31A1, CTR1; solute carrier family 31 (copper transporter), member 1	map04978|Mineral absorption
f2p35_2101_3840	gi|743823746|ref|XM_011023739.1|	3568	E:0	PREDICTED: Populus euphratica cytochrome P450 86B1 (LOC105123947), mRNA	gi|743823747|ref|XP_011022041.1|	1085	E:0	PREDICTED: cytochrome P450 86B1 [Populus euphratica]	C86B1_ARATH	786	E:0	RecName: Full=Cytochrome P450 86B1;^Eukaryota; Viridiplantae; Streptophyta; Embryophyta; Tracheophyta; Spermatophyta; Magnoliophyta; eudicotyledons; Gunneridae; Pentapetalae; rosids; malvids; Brassicales; Brassicaceae; Camelineae; Arabidopsis	C86B1_ARATH	808	E:0	RecName: Full=Cytochrome P450 86B1;^Eukaryota; Viridiplantae; Streptophyta; Embryophyta; Tracheophyta; Spermatophyta; Magnoliophyta; eudicotyledons; Gunneridae; Pentapetalae; rosids; malvids; Brassicales; Brassicaceae; Camelineae; Arabidopsis	PF00067.21	p450	Cytochrome P450	COG2124	Cytochrome p450	.	ExpAA=32.20^PredHel=1^Topology=i55-77o	.	GO:0071555|cell wall organization;GO:0010345|suberin biosynthetic process;GO:0042761|very long-chain fatty acid biosynthetic processGO:0055114|oxidation-reduction process	GO:0020037|heme binding;GO:0005506|iron ion binding;GO:0004497|monooxygenase activity;GO:0016705|oxidoreductase activity, acting on paired donors, with incorporation or reduction of molecular oxygenGO:0005506|iron ion binding;GO:0016705|oxidoreductase activity, acting on paired donors, with incorporation or reduction of molecular oxygen;GO:0020037|heme binding	GO:0005783|endoplasmic reticulum;GO:0005789|endoplasmic reticulum membrane;GO:0016021|integral component of membrane	K15402|CYP86B1; fatty acid omega-hydroxylase [EC:1.14.-.-]	map00073|Cutin, suberine and wax biosynthesis
f3p60_1686_5899	gi|118487800|gb|EF147718.1|	2996	E:0	Populus trichocarpa clone WS0124_I08 unknown mRNA	gi|566215399|ref|XP_002324555.2|	1041	E:0	serine carboxypeptidase S28 family protein [Populus trichocarpa]	PCP_BOVIN	405	E:1e-133	RecName: Full=Lysosomal Pro-X carboxypeptidase;^Eukaryota; Metazoa; Chordata; Craniata; Vertebrata; Euteleostomi; Mammalia; Eutheria; Laurasiatheria; Cetartiodactyla; Ruminantia; Pecora; Bovidae; Bovinae; Bos	PCP_BOVIN	405	E:2e-134	RecName: Full=Lysosomal Pro-X carboxypeptidase;^Eukaryota; Metazoa; Chordata; Craniata; Vertebrata; Euteleostomi; Mammalia; Eutheria; Laurasiatheria; Cetartiodactyla; Ruminantia; Pecora; Bovidae; Bovinae; Bos	PF05577.11	Peptidase_S28	Serine carboxypeptidase S28	ENOG410Y38A	Lysosomal Pro-X	.	ExpAA=21.09^PredHel=1^Topology=i7-29o	.	GO:0060055|angiogenesis involved in wound healing;GO:0003085|negative regulation of systemic arterial blood pressure;GO:0006508|proteolysis;GO:0043535|regulation of blood vessel endothelial cell migrationGO:0006508|proteolysis	GO:0004180|carboxypeptidase activity;GO:0008239|dipeptidyl-peptidase activity;GO:0008236|serine-type peptidase activityGO:0008236|serine-type peptidase activity	GO:0005764|lysosome	K01285|PRCP; lysosomal Pro-X carboxypeptidase [EC:3.4.16.2]	map04614|Renin-angiotensin system;map04974|Protein digestion and absorption
f2p60_2248_3430	gi|566153217|ref|XM_002300314.2|	3797	E:0	Populus trichocarpa hypothetical protein (POPTR_0001s37150g) mRNA, complete cds	gi|224061108|ref|XP_002300350.1|	966	E:0	hypothetical protein POPTR_0001s37150g [Populus trichocarpa]	XYLT_ARATH	601	E:0	RecName: Full=Beta-(1,2)-xylosyltransferase;^Eukaryota; Viridiplantae; Streptophyta; Embryophyta; Tracheophyta; Spermatophyta; Magnoliophyta; eudicotyledons; Gunneridae; Pentapetalae; rosids; malvids; Brassicales; Brassicaceae; Camelineae; Arabidopsis	XYLT_ARATH	642	E:0	RecName: Full=Beta-(1,2)-xylosyltransferase;^Eukaryota; Viridiplantae; Streptophyta; Embryophyta; Tracheophyta; Spermatophyta; Magnoliophyta; eudicotyledons; Gunneridae; Pentapetalae; rosids; malvids; Brassicales; Brassicaceae; Camelineae; Arabidopsis	PF04577.13	DUF563	Protein of unknown function (DUF563)	ENOG410ZHQA	glycosyltransferase	.	ExpAA=17.21^PredHel=1^Topology=i34-56o	.	GO:0031204|posttranslational protein targeting to membrane, translocation;GO:0006487|protein N-linked glycosylation	GO:0050513|glycoprotein 2-beta-D-xylosyltransferase activity;GO:0042285|xylosyltransferase activityGO:0016757|transferase activity, transferring glycosyl groups	GO:0005794|Golgi apparatus;GO:0032580|Golgi cisterna membrane;GO:0005797|Golgi medial cisterna;GO:0000139|Golgi membrane;GO:0016021|integral component of membrane	K03714|E2.4.2.38; glycoprotein 2-beta-D-xylosyltransferase [EC:2.4.2.38]	map00513|Various types of N-glycan biosynthesis
f2p60_4096_18055	gi|743907696|ref|XM_011048979.1|	6922	E:0	PREDICTED: Populus euphratica alpha-mannosidase 2x (LOC105141682), mRNA	gi|743907697|ref|XP_011047281.1|	2195	E:0	PREDICTED: LOW QUALITY PROTEIN: alpha-mannosidase 2x [Populus euphratica]	GMAN2_ARATH	1675	E:0	RecName: Full=Alpha-mannosidase 2 {ECO:0000303|PubMed:16460512};^Eukaryota; Viridiplantae; Streptophyta; Embryophyta; Tracheophyta; Spermatophyta; Magnoliophyta; eudicotyledons; Gunneridae; Pentapetalae; rosids; malvids; Brassicales; Brassicaceae; Camelineae; Arabidopsis	GMAN2_ARATH	1786	E:0	RecName: Full=Alpha-mannosidase 2 {ECO:0000303|PubMed:16460512};^Eukaryota; Viridiplantae; Streptophyta; Embryophyta; Tracheophyta; Spermatophyta; Magnoliophyta; eudicotyledons; Gunneridae; Pentapetalae; rosids; malvids; Brassicales; Brassicaceae; Camelineae; Arabidopsis	PF01074.21	Glyco_hydro_38	Glycosyl hydrolases family 38 N-terminal domain	ENOG410XQMZ	Mannosidase alpha class	.	ExpAA=24.94^PredHel=1^Topology=i48-70o	.	GO:0042538|hyperosmotic salinity response;GO:0006013|mannose metabolic process;GO:0006491|N-glycan processing;GO:0006517|protein deglycosylation;GO:0006487|protein N-linked glycosylationGO:0006013|mannose metabolic process	GO:0004559|alpha-mannosidase activity;GO:0030246|carbohydrate binding;GO:0004572|mannosyl-oligosaccharide 1,3-1,6-alpha-mannosidase activity;GO:0046872|metal ion bindingGO:0004559|alpha-mannosidase activity	GO:0005768|endosome;GO:0005794|Golgi apparatus;GO:0000139|Golgi membrane;GO:0016021|integral component of membrane;GO:0005802|trans-Golgi network	K01231|MAN2; alpha-mannosidase II [EC:3.2.1.114]	map00513|Various types of N-glycan biosynthesis;map01100|Metabolic pathways;map00510|N-Glycan biosynthesis
f2p60_2091_21678	gi|743895977|ref|XM_011042966.1|	3574	E:0	PREDICTED: Populus euphratica 4-coumarate--CoA ligase-like 5 (LOC105137269), mRNA	gi|224085996|ref|XP_002307770.1|	1061	E:0	4-coumarate--CoA ligase family protein [Populus trichocarpa]	4CLL5_ARATH	796	E:0	RecName: Full=4-coumarate--CoA ligase-like 5;^Eukaryota; Viridiplantae; Streptophyta; Embryophyta; Tracheophyta; Spermatophyta; Magnoliophyta; eudicotyledons; Gunneridae; Pentapetalae; rosids; malvids; Brassicales; Brassicaceae; Camelineae; Arabidopsis	4CLL5_ARATH	838	E:0	RecName: Full=4-coumarate--CoA ligase-like 5;^Eukaryota; Viridiplantae; Streptophyta; Embryophyta; Tracheophyta; Spermatophyta; Magnoliophyta; eudicotyledons; Gunneridae; Pentapetalae; rosids; malvids; Brassicales; Brassicaceae; Camelineae; Arabidopsis	PF00501.27	AMP-binding	AMP-binding enzyme	COG0318	Amp-dependent synthetase and ligase	.	ExpAA=54.22^PredHel=2^Topology=o92-114i251-273o	.	GO:0009695|jasmonic acid biosynthetic process;GO:0009611|response to woundingGO:0008152|metabolic process	GO:0005524|ATP binding;GO:0016874|ligase activityGO:0003824|catalytic activity	GO:0005777|peroxisome	K10526|OPCL1; OPC-8:0 CoA ligase 1 [EC:6.2.1.-]	map00592|alpha-Linolenic acid metabolism;map01100|Metabolic pathways;map01110|Biosynthesis of secondary metabolites
f2p60_677_14210	gi|224135834|ref|XM_002322136.1|	1110	E:0	Populus trichocarpa glutaredoxin family protein (POPTR_0015s09000g) mRNA, complete cds	gi|743849696|ref|XP_011028538.1|	273	E:2e-90	PREDICTED: glutaredoxin-C1 [Populus euphratica]	GRXC1_ARATH	151	E:2e-44	RecName: Full=Glutaredoxin-C1;^Eukaryota; Viridiplantae; Streptophyta; Embryophyta; Tracheophyta; Spermatophyta; Magnoliophyta; eudicotyledons; Gunneridae; Pentapetalae; rosids; malvids; Brassicales; Brassicaceae; Camelineae; Arabidopsis	GRXC1_ARATH	170	E:5e-53	RecName: Full=Glutaredoxin-C1;^Eukaryota; Viridiplantae; Streptophyta; Embryophyta; Tracheophyta; Spermatophyta; Magnoliophyta; eudicotyledons; Gunneridae; Pentapetalae; rosids; malvids; Brassicales; Brassicaceae; Camelineae; Arabidopsis	PF00462.23	Glutaredoxin	Glutaredoxin	COG0695	Glutaredoxin	.	ExpAA=21.05^PredHel=1^Topology=o4-25i	.	GO:0045454|cell redox homeostasisGO:0045454|cell redox homeostasis	GO:0009055|electron carrier activity;GO:0015035|protein disulfide oxidoreductase activityGO:0009055|electron carrier activity;GO:0015035|protein disulfide oxidoreductase activity	GO:0005737|cytoplasm	K03676|grxC, GLRX, GLRX2; glutaredoxin 3	map01100|Metabolic pathways;map00240|Pyrimidine metabolism;map00230|Purine metabolism
f4p60_3251_18906	gi|566173209|ref|XM_002307657.2|	5542	E:0	Populus trichocarpa hypothetical protein (POPTR_0005s25550g) mRNA, complete cds	gi|224085778|ref|XP_002307693.1|	1598	E:0	hypothetical protein POPTR_0005s25550g [Populus trichocarpa]	VHAA2_ARATH	1194	E:0	RecName: Full=V-type proton ATPase subunit a2;^Eukaryota; Viridiplantae; Streptophyta; Embryophyta; Tracheophyta; Spermatophyta; Magnoliophyta; eudicotyledons; Gunneridae; Pentapetalae; rosids; malvids; Brassicales; Brassicaceae; Camelineae; Arabidopsis	VHAA2_ARATH	1243	E:0	RecName: Full=V-type proton ATPase subunit a2;^Eukaryota; Viridiplantae; Streptophyta; Embryophyta; Tracheophyta; Spermatophyta; Magnoliophyta; eudicotyledons; Gunneridae; Pentapetalae; rosids; malvids; Brassicales; Brassicaceae; Camelineae; Arabidopsis	PF01496.18	V_ATPase_I	V-type ATPase 116kDa subunit family	COG1269	ATPase 116 kDa subunit	.	ExpAA=134.44^PredHel=6^Topology=o423-445i465-487o548-570i583-605o635-654i753-775o	.	GO:0015991|ATP hydrolysis coupled proton transport;GO:0015986|ATP synthesis coupled proton transport;GO:0032119|sequestering of zinc ion;GO:0007035|vacuolar acidification;GO:0070072|vacuolar proton-transporting V-type ATPase complex assembly;GO:0043181|vacuolar sequesteringGO:0015991|ATP hydrolysis coupled proton transport	GO:0051117|ATPase binding;GO:0009678|hydrogen-translocating pyrophosphatase activity;GO:0045735|nutrient reservoir activity;GO:0046961|proton-transporting ATPase activity, rotational mechanismGO:0015078|hydrogen ion transmembrane transporter activity	GO:0009507|chloroplast;GO:0005794|Golgi apparatus;GO:0016021|integral component of membrane;GO:0016020|membrane;GO:0005739|mitochondrion;GO:0000325|plant-type vacuole;GO:0009705|plant-type vacuole membrane;GO:0005774|vacuolar membrane;GO:0016471|vacuolar proton-transporting V-type ATPase complex;GO:0000220|vacuolar proton-transporting V-type ATPase, V0 domain;GO:0005773|vacuoleGO:0033179|proton-t…	K02154|ATPeV0A, ATP6N; V-type H+-transporting ATPase subunit a	map05110|Vibrio cholerae infection;map04142|Lysosome;map04145|Phagosome;map05120|Epithelial cell signaling in Helicobacter pylori infection;map05152|Tuberculosis;map04721|Synaptic vesicle cycle;map05323|Rheumatoid arthritis;map04966|Collecting duct acid secretion;map01100|Metabolic pathways;map00190|Oxidative phosphorylation
f2p60_1729_23627	gi|566224885|ref|XM_006370909.1|	3048	E:0	Populus trichocarpa GPI-anchor transamidase family protein (POPTR_0019s02260g) mRNA, complete cds	gi|566224886|ref|XP_006370971.1|	841	E:0	GPI-anchor transamidase family protein [Populus trichocarpa]	GPI8_DROME	360	E:1e-117	RecName: Full=Putative GPI-anchor transamidase;^Eukaryota; Metazoa; Ecdysozoa; Arthropoda; Hexapoda; Insecta; Pterygota; Neoptera; Holometabola; Diptera; Brachycera; Muscomorpha; Ephydroidea; Drosophilidae; Drosophila; Sophophora	GPI8_DROME	359	E:6e-120	RecName: Full=Putative GPI-anchor transamidase;^Eukaryota; Metazoa; Ecdysozoa; Arthropoda; Hexapoda; Insecta; Pterygota; Neoptera; Holometabola; Diptera; Brachycera; Muscomorpha; Ephydroidea; Drosophilidae; Drosophila; Sophophora	PF01650.17	Peptidase_C13	Peptidase C13 family	COG5206	phosphatidylinositol glycan anchor biosynthesis, class K	.	ExpAA=51.27^PredHel=3^Topology=i7-29o39-56i385-404o	.	GO:0016255|attachment of GPI anchor to protein;GO:0034394|protein localization to cell surfaceGO:0006508|proteolysis	GO:0008234|cysteine-type peptidase activity;GO:0003923|GPI-anchor transamidase activityGO:0008233|peptidase activity	GO:0042765|GPI-anchor transamidase complex	K05290|PIGK; phosphatidylinositol glycan, class K [EC:2.6.-.-]	map00563|Glycosylphosphatidylinositol(GPI)-anchor biosynthesis;map01100|Metabolic pathways
f3p60_1845_22867	gi|566203249|ref|XM_002320785.2|	3306	E:0	Populus trichocarpa CAAX protease family protein (POPTR_0014s08490g) mRNA, complete cds	gi|224130374|ref|XP_002320821.1|	864	E:0	CAAX protease family protein [Populus trichocarpa]	FACE1_ARATH	760	E:0	RecName: Full=CAAX prenyl protease 1 homolog;^Eukaryota; Viridiplantae; Streptophyta; Embryophyta; Tracheophyta; Spermatophyta; Magnoliophyta; eudicotyledons; Gunneridae; Pentapetalae; rosids; malvids; Brassicales; Brassicaceae; Camelineae; Arabidopsis	FACE1_ARATH	759	E:0	RecName: Full=CAAX prenyl protease 1 homolog;^Eukaryota; Viridiplantae; Streptophyta; Embryophyta; Tracheophyta; Spermatophyta; Magnoliophyta; eudicotyledons; Gunneridae; Pentapetalae; rosids; malvids; Brassicales; Brassicaceae; Camelineae; Arabidopsis	PF16491.4	Peptidase_M48_N	CAAX prenyl protease N-terminal, five membrane helices	COG0501	Protease HtpX homolog	.	ExpAA=134.99^PredHel=5^Topology=o4-23i64-86o152-174i181-203o293-315i	.	GO:0080120|CAAX-box protein maturation;GO:0071586|CAAX-box protein processing;GO:0006508|proteolysisGO:0006508|proteolysis	GO:0004175|endopeptidase activity;GO:0046872|metal ion binding;GO:0004222|metalloendopeptidase activityGO:0004222|metalloendopeptidase activity	GO:0005783|endoplasmic reticulum;GO:0030176|integral component of endoplasmic reticulum membrane;GO:0005773|vacuole	K06013|STE24; STE24 endopeptidase [EC:3.4.24.84]	map00900|Terpenoid backbone biosynthesis;map01130|Biosynthesis of antibiotics
f2p60_1207_27797	gi|566149016|ref|XM_002299228.2|	2122	E:0	Populus trichocarpa Golgi SNARE 11 family protein (POPTR_0001s14820g) mRNA, complete cds	gi|224057553|ref|XP_002299264.1|	459	E:7e-160	Golgi SNARE 11 family protein [Populus trichocarpa]	GOS11_ARATH	369	E:1e-125	RecName: Full=Golgi SNAP receptor complex member 1-1;^Eukaryota; Viridiplantae; Streptophyta; Embryophyta; Tracheophyta; Spermatophyta; Magnoliophyta; eudicotyledons; Gunneridae; Pentapetalae; rosids; malvids; Brassicales; Brassicaceae; Camelineae; Arabidopsis	GOS11_ARATH	369	E:1e-128	RecName: Full=Golgi SNAP receptor complex member 1-1;^Eukaryota; Viridiplantae; Streptophyta; Embryophyta; Tracheophyta; Spermatophyta; Magnoliophyta; eudicotyledons; Gunneridae; Pentapetalae; rosids; malvids; Brassicales; Brassicaceae; Camelineae; Arabidopsis	PF12352.7	V-SNARE_C	Snare region anchored in the vesicle membrane C-terminus	ENOG410YI1X	Involved in transport from the ER to the Golgi apparatus as well as in intra-Golgi transport. It belongs to a super-family of proteins called t-SNAREs or soluble NSF (N-ethylmaleimide- sensitive factor) attachment protein receptor (By similarity)	.	ExpAA=19.77^PredHel=1^Topology=i206-225o	.	GO:0006888|ER to Golgi vesicle-mediated transport;GO:0015031|protein transport;GO:0048209|regulation of vesicle targeting, to, from or within Golgi;GO:0006906|vesicle fusion	GO:0005484|SNAP receptor activity	GO:0005801|cis-Golgi network;GO:0005794|Golgi apparatus;GO:0005797|Golgi medial cisterna;GO:0000139|Golgi membrane;GO:0016021|integral component of membrane;GO:0031201|SNARE complex	K08495|GOSR1, GOS1; golgi SNAP receptor complex member 1	map04130|SNARE interactions in vesicular transport
f2p60_2234_21111	gi|566187311|ref|XM_002313818.2|	3960	E:0	Populus trichocarpa alpha1 family protein (POPTR_0009s10430g) mRNA, complete cds	gi|224105555|ref|XP_002313854.1|	1086	E:0	alpha1 family protein [Populus trichocarpa]	FUT11_ARATH	699	E:0	RecName: Full=Glycoprotein 3-alpha-L-fucosyltransferase A;^Eukaryota; Viridiplantae; Streptophyta; Embryophyta; Tracheophyta; Spermatophyta; Magnoliophyta; eudicotyledons; Gunneridae; Pentapetalae; rosids; malvids; Brassicales; Brassicaceae; Camelineae; Arabidopsis	FUT11_ARATH	699	E:0	RecName: Full=Glycoprotein 3-alpha-L-fucosyltransferase A;^Eukaryota; Viridiplantae; Streptophyta; Embryophyta; Tracheophyta; Spermatophyta; Magnoliophyta; eudicotyledons; Gunneridae; Pentapetalae; rosids; malvids; Brassicales; Brassicaceae; Camelineae; Arabidopsis	PF00852.18	Glyco_transf_10	Glycosyltransferase family 10 (fucosyltransferase) C-term	ENOG410ZIMX	(Alpha (1,3) fucosyltransferase	.	ExpAA=19.63^PredHel=1^Topology=i40-59o	.	GO:0071555|cell wall organization;GO:0042355|L-fucose catabolic process;GO:0006486|protein glycosylation;GO:0006487|protein N-linked glycosylationGO:0006486|protein glycosylation	GO:0046920|alpha-(1->3)-fucosyltransferase activity;GO:0008417|fucosyltransferase activity;GO:0018392|glycoprotein 3-alpha-L-fucosyltransferase activity;GO:0046872|metal ion bindingGO:0008417|fucosyltransferase activity	GO:0005794|Golgi apparatus;GO:0032580|Golgi cisterna membrane;GO:0016021|integral component of membraneGO:0016020|membrane	K00753|E2.4.1.214; glycoprotein 3-alpha-L-fucosyltransferase [EC:2.4.1.214]	map00513|Various types of N-glycan biosynthesis
f2p60_1458_7382	gi|566190798|ref|XM_002315942.2|	2401	E:0	Populus trichocarpa ethanolaminephosphotransferase family protein (POPTR_0010s14380g) mRNA, complete cds	gi|566190799|ref|XP_002315978.2|	679	E:0	ethanolaminephosphotransferase family protein [Populus trichocarpa]	AAPT1_ARATH	592	E:0	RecName: Full=Choline/ethanolaminephosphotransferase 1;^Eukaryota; Viridiplantae; Streptophyta; Embryophyta; Tracheophyta; Spermatophyta; Magnoliophyta; eudicotyledons; Gunneridae; Pentapetalae; rosids; malvids; Brassicales; Brassicaceae; Camelineae; Arabidopsis	AAPT1_ARATH	592	E:0	RecName: Full=Choline/ethanolaminephosphotransferase 1;^Eukaryota; Viridiplantae; Streptophyta; Embryophyta; Tracheophyta; Spermatophyta; Magnoliophyta; eudicotyledons; Gunneridae; Pentapetalae; rosids; malvids; Brassicales; Brassicaceae; Camelineae; Arabidopsis	PF01066.20	CDP-OH_P_transf	CDP-alcohol phosphatidyltransferase	COG5050	phosphotransferase 1	.	ExpAA=150.70^PredHel=7^Topology=o88-107i120-142o162-184i196-218o233-255i267-284o294-316i	.	GO:0006646|phosphatidylethanolamine biosynthetic processGO:0008654|phospholipid biosynthetic process	GO:0004142|diacylglycerol cholinephosphotransferase activity;GO:0004307|ethanolaminephosphotransferase activity;GO:0046872|metal ion bindingGO:0016780|phosphotransferase activity, for other substituted phosphate groups	GO:0005794|Golgi apparatus;GO:0016021|integral component of membraneGO:0016020|membrane	K00993|EPT1; ethanolaminephosphotransferase [EC:2.7.8.1]	map00440|Phosphonate and phosphinate metabolism;map01100|Metabolic pathways;map01110|Biosynthesis of secondary metabolites;map00565|Ether lipid metabolism;map00564|Glycerophospholipid metabolism
f2p60_4306_265	gi|743822601|ref|XM_011023434.1|	7363	E:0	PREDICTED: Populus euphratica histidine kinase 4-like (LOC105123728), mRNA	gi|224108221|ref|XP_002314765.1|	2006	E:0	cytokinin response 1 family protein [Populus trichocarpa]	AHK4_ARATH	1380	E:0	RecName: Full=Histidine kinase 4;^Eukaryota; Viridiplantae; Streptophyta; Embryophyta; Tracheophyta; Spermatophyta; Magnoliophyta; eudicotyledons; Gunneridae; Pentapetalae; rosids; malvids; Brassicales; Brassicaceae; Camelineae; Arabidopsis	AHK4_ARATH	1431	E:0	RecName: Full=Histidine kinase 4;^Eukaryota; Viridiplantae; Streptophyta; Embryophyta; Tracheophyta; Spermatophyta; Magnoliophyta; eudicotyledons; Gunneridae; Pentapetalae; rosids; malvids; Brassicales; Brassicaceae; Camelineae; Arabidopsis	PF03924.12	CHASE	CHASE domain	COG0642	Histidine kinase	.	ExpAA=44.15^PredHel=2^Topology=o41-60i331-353o	.	GO:0033500|carbohydrate homeostasis;GO:0016036|cellular response to phosphate starvation;GO:0071329|cellular response to sucrose stimulus;GO:0009736|cytokinin-activated signaling pathway;GO:0042742|defense response to bacterium;GO:0010086|embryonic root morphogenesis;GO:0009116|nucleoside metabolic process;GO:0007231|osmosensory signaling pathway;GO:0000160|phosphorelay signal transduction system…	GO:0019955|cytokine binding;GO:0009884|cytokinin receptor activity;GO:0019899|enzyme binding;GO:0004721|phosphoprotein phosphatase activity;GO:0000155|phosphorelay sensor kinase activity;GO:0004673|protein histidine kinase activity;GO:0043424|protein histidine kinase binding;GO:0019901|protein kinase binding;GO:0009885|transmembrane histidine kinase cytokinin receptor activityGO:0000155|phosphore…	GO:0005783|endoplasmic reticulum;GO:0005789|endoplasmic reticulum membrane;GO:0016021|integral component of membrane;GO:0005886|plasma membrane	K14489|AHK2_3_4; arabidopsis histidine kinase 2/3/4 (cytokinin receptor) [EC:2.7.13.3]	map04075|Plant hormone signal transduction
f4p60_2164_3729	gi|118483702|gb|EF145601.1|	3410	E:0	Populus trichocarpa clone WS01126_N03 unknown mRNA	gi|224061851|ref|XP_002300630.1|	877	E:0	ribophorin 1 family protein [Populus trichocarpa]	OST1A_ARATH	639	E:0	RecName: Full=Dolichyl-diphosphooligosaccharide--protein glycosyltransferase subunit 1A;^Eukaryota; Viridiplantae; Streptophyta; Embryophyta; Tracheophyta; Spermatophyta; Magnoliophyta; eudicotyledons; Gunneridae; Pentapetalae; rosids; malvids; Brassicales; Brassicaceae; Camelineae; Arabidopsis	OST1A_ARATH	74.3	E:6e-15	RecName: Full=Dolichyl-diphosphooligosaccharide--protein glycosyltransferase subunit 1A;^Eukaryota; Viridiplantae; Streptophyta; Embryophyta; Tracheophyta; Spermatophyta; Magnoliophyta; eudicotyledons; Gunneridae; Pentapetalae; rosids; malvids; Brassicales; Brassicaceae; Camelineae; Arabidopsis	PF04597.13	Ribophorin_I	Ribophorin I	ENOG410XQVZ	ribophorin I	.	ExpAA=17.66^PredHel=1^Topology=i39-61o	.	GO:0018279|protein N-linked glycosylation via asparagineGO:0006486|protein glycosylation	GO:0004579|dolichyl-diphosphooligosaccharide-protein glycotransferase activityGO:0004579|dolichyl-diphosphooligosaccharide-protein glycotransferase activity	GO:0005783|endoplasmic reticulum;GO:0016021|integral component of membrane;GO:0016020|membrane;GO:0008250|oligosaccharyltransferase complexGO:0005783|endoplasmic reticulum;GO:0016021|integral component of membrane	K12666|OST1, RPN1; oligosaccharyltransferase complex subunit alpha (ribophorin I);K12666|OST1, RPN1; oligosaccharyltransferase complex subunit alpha (ribophorin I)	map04141|Protein processing in endoplasmic reticulum;map00513|Various types of N-glycan biosynthesis;map01100|Metabolic pathways;map00510|N-Glycan biosynthesis;map04141|Protein processing in endoplasmic reticulum;map00513|Various types of N-glycan biosynthesis;map01100|Metabolic pathways;map00510|N-Glycan biosynthesis
f4p60_2164_3729	gi|118483702|gb|EF145601.1|	3410	E:0	Populus trichocarpa clone WS01126_N03 unknown mRNA	gi|224061851|ref|XP_002300630.1|	877	E:0	ribophorin 1 family protein [Populus trichocarpa]	OST1A_ARATH	639	E:0	RecName: Full=Dolichyl-diphosphooligosaccharide--protein glycosyltransferase subunit 1A;^Eukaryota; Viridiplantae; Streptophyta; Embryophyta; Tracheophyta; Spermatophyta; Magnoliophyta; eudicotyledons; Gunneridae; Pentapetalae; rosids; malvids; Brassicales; Brassicaceae; Camelineae; Arabidopsis	OST1A_ARATH	74.3	E:0	RecName: Full=Dolichyl-diphosphooligosaccharide--protein glycosyltransferase subunit 1A;^Eukaryota; Viridiplantae; Streptophyta; Embryophyta; Tracheophyta; Spermatophyta; Magnoliophyta; eudicotyledons; Gunneridae; Pentapetalae; rosids; malvids; Brassicales; Brassicaceae; Camelineae; Arabidopsis	PF04597.13	Ribophorin_I	Ribophorin I	ENOG410XQVZ	ribophorin I	.	ExpAA=20.08^PredHel=1^Topology=o341-360i	.	GO:0018279|protein N-linked glycosylation via asparagineGO:0006486|protein glycosylation	GO:0004579|dolichyl-diphosphooligosaccharide-protein glycotransferase activityGO:0004579|dolichyl-diphosphooligosaccharide-protein glycotransferase activity	GO:0005783|endoplasmic reticulum;GO:0016021|integral component of membrane;GO:0016020|membrane;GO:0008250|oligosaccharyltransferase complexGO:0005783|endoplasmic reticulum;GO:0016021|integral component of membrane	K12666|OST1, RPN1; oligosaccharyltransferase complex subunit alpha (ribophorin I);K12666|OST1, RPN1; oligosaccharyltransferase complex subunit alpha (ribophorin I)	map04141|Protein processing in endoplasmic reticulum;map00513|Various types of N-glycan biosynthesis;map01100|Metabolic pathways;map00510|N-Glycan biosynthesis;map04141|Protein processing in endoplasmic reticulum;map00513|Various types of N-glycan biosynthesis;map01100|Metabolic pathways;map00510|N-Glycan biosynthesis
f2p38_1955_22225	gi|566161198|ref|XM_002303351.2|	3458	E:0	Populus trichocarpa hypothetical protein (POPTR_0003s06510g) mRNA, complete cds	gi|566161199|ref|XP_002303387.2|	963	E:0	hypothetical protein POPTR_0003s06510g [Populus trichocarpa]	F3PH_ARATH	367	E:2e-117	RecName: Full=Flavonoid 3'-monooxygenase;^Eukaryota; Viridiplantae; Streptophyta; Embryophyta; Tracheophyta; Spermatophyta; Magnoliophyta; eudicotyledons; Gunneridae; Pentapetalae; rosids; malvids; Brassicales; Brassicaceae; Camelineae; Arabidopsis	F3PH_ARATH	384	E:6e-126	RecName: Full=Flavonoid 3'-monooxygenase;^Eukaryota; Viridiplantae; Streptophyta; Embryophyta; Tracheophyta; Spermatophyta; Magnoliophyta; eudicotyledons; Gunneridae; Pentapetalae; rosids; malvids; Brassicales; Brassicaceae; Camelineae; Arabidopsis	PF00067.21	p450	Cytochrome P450	COG2124	Cytochrome p450	.	ExpAA=20.20^PredHel=1^Topology=i16-33o	.	GO:0009813|flavonoid biosynthetic process;GO:0009733|response to auxin;GO:0044550|secondary metabolite biosynthetic processGO:0055114|oxidation-reduction process	GO:0016711|flavonoid 3'-monooxygenase activity;GO:0020037|heme binding;GO:0005506|iron ion bindingGO:0005506|iron ion binding;GO:0016705|oxidoreductase activity, acting on paired donors, with incorporation or reduction of molecular oxygen;GO:0020037|heme binding	GO:0005789|endoplasmic reticulum membrane;GO:0016021|integral component of membrane;GO:0016020|membrane	K05280|E1.14.13.21; flavonoid 3'-monooxygenase [EC:1.14.13.21]	map00944|Flavone and flavonol biosynthesis;map01100|Metabolic pathways;map00941|Flavonoid biosynthesis;map01110|Biosynthesis of secondary metabolites
f2p60_1767_23393	gi|566181165|ref|XM_002310800.2|	3088	E:0	Populus trichocarpa mRNA for putative aldehyde dehydrogenase family protein (POPTR_0007s13650g) mRNA, complete cds	gi|224097106|ref|XP_002310836.1|	956	E:0	mRNA for putative aldehyde dehydrogenase family protein [Populus trichocarpa]	AL3F1_ARATH	643	E:0	RecName: Full=Aldehyde dehydrogenase family 3 member F1;^Eukaryota; Viridiplantae; Streptophyta; Embryophyta; Tracheophyta; Spermatophyta; Magnoliophyta; eudicotyledons; Gunneridae; Pentapetalae; rosids; malvids; Brassicales; Brassicaceae; Camelineae; Arabidopsis	AL3F1_ARATH	656	E:0	RecName: Full=Aldehyde dehydrogenase family 3 member F1;^Eukaryota; Viridiplantae; Streptophyta; Embryophyta; Tracheophyta; Spermatophyta; Magnoliophyta; eudicotyledons; Gunneridae; Pentapetalae; rosids; malvids; Brassicales; Brassicaceae; Camelineae; Arabidopsis	PF00171.21	Aldedh	Aldehyde dehydrogenase family	COG1012	Dehydrogenase	.	ExpAA=19.34^PredHel=1^Topology=o482-501i	.	GO:0006081|cellular aldehyde metabolic processGO:0008152|metabolic process;GO:0055114|oxidation-reduction process	GO:0004029|aldehyde dehydrogenase (NAD) activity;GO:0004030|aldehyde dehydrogenase [NAD(P)+] activityGO:0016491|oxidoreductase activity	GO:0005783|endoplasmic reticulum;GO:0016020|membrane	K00128|E1.2.1.3; aldehyde dehydrogenase (NAD+) [EC:1.2.1.3]	map00620|Pyruvate metabolism;map00280|Valine, leucine and isoleucine degradation;map00380|Tryptophan metabolism;map00625|Chloroalkane and chloroalkene degradation;map00010|Glycolysis / Gluconeogenesis;map00071|Fatty acid degradation;map00561|Glycerolipid metabolism;map00330|Arginine and proline metabolism;map00410|beta-Alanine metabolism;map00310|Lysine degradation;map00040|Pentose and glucuronat…
f3p60_2778_19691	gi|566196626|ref|XM_002317685.2|	4854	E:0	Populus trichocarpa cyclic nucleotide-gated ion channel 20 family protein (POPTR_0012s03570g) mRNA, complete cds	gi|224118056|ref|XP_002317721.1|	1382	E:0	cyclic nucleotide-gated ion channel 20 family protein [Populus trichocarpa]	CNG20_ARATH	815	E:0	RecName: Full=Probable cyclic nucleotide-gated ion channel 20, chloroplastic;^Eukaryota; Viridiplantae; Streptophyta; Embryophyta; Tracheophyta; Spermatophyta; Magnoliophyta; eudicotyledons; Gunneridae; Pentapetalae; rosids; malvids; Brassicales; Brassicaceae; Camelineae; Arabidopsis	CNG20_ARATH	923	E:0	RecName: Full=Probable cyclic nucleotide-gated ion channel 20, chloroplastic;^Eukaryota; Viridiplantae; Streptophyta; Embryophyta; Tracheophyta; Spermatophyta; Magnoliophyta; eudicotyledons; Gunneridae; Pentapetalae; rosids; malvids; Brassicales; Brassicaceae; Camelineae; Arabidopsis	PF00520.30	Ion_trans	Ion transport protein	ENOG410XPSE	Potassium voltage-gated channel, subfamily H (Eag-related), member	.	ExpAA=124.66^PredHel=5^Topology=i197-219o234-256i285-307o358-380i487-509o	.	GO:0042391|regulation of membrane potential;GO:0009624|response to nematodeGO:0006811|ion transport;GO:0055085|transmembrane transport	GO:0005516|calmodulin binding;GO:0030552|cAMP binding;GO:0030553|cGMP binding;GO:0005249|voltage-gated potassium channel activityGO:0005216|ion channel activity	GO:0009535|chloroplast thylakoid membrane;GO:0005887|integral component of plasma membraneGO:0016020|membrane	K05391|CNGF; cyclic nucleotide gated channel, other eukaryote	map04626|Plant-pathogen interaction
f2p60_1828_23051	gi|566176384|ref|XM_006381556.1|	3112	E:0	Populus trichocarpa hypothetical protein (POPTR_0006s14370g) mRNA, complete cds	gi|566176385|ref|XP_006381618.1|	969	E:0	hypothetical protein POPTR_0006s14370g [Populus trichocarpa]	C71A1_PERAE	376	E:1e-121	RecName: Full=Cytochrome P450 71A1;^Eukaryota; Viridiplantae; Streptophyta; Embryophyta; Tracheophyta; Spermatophyta; Magnoliophyta; Magnoliidae; Laurales; Lauraceae; Persea	F3PH_ARATH	405	E:6e-134	RecName: Full=Flavonoid 3'-monooxygenase;^Eukaryota; Viridiplantae; Streptophyta; Embryophyta; Tracheophyta; Spermatophyta; Magnoliophyta; eudicotyledons; Gunneridae; Pentapetalae; rosids; malvids; Brassicales; Brassicaceae; Camelineae; Arabidopsis	PF00067.21	p450	Cytochrome P450	COG2124	Cytochrome p450	.	ExpAA=23.00^PredHel=1^Topology=i12-34o	.	GO:0009813|flavonoid biosynthetic process;GO:0009733|response to auxin;GO:0044550|secondary metabolite biosynthetic processGO:0055114|oxidation-reduction process	GO:0016711|flavonoid 3'-monooxygenase activity;GO:0020037|heme binding;GO:0005506|iron ion bindingGO:0005506|iron ion binding;GO:0016705|oxidoreductase activity, acting on paired donors, with incorporation or reduction of molecular oxygen;GO:0020037|heme binding	GO:0005789|endoplasmic reticulum membrane;GO:0016021|integral component of membrane;GO:0016020|membrane	K05280|E1.14.13.21; flavonoid 3'-monooxygenase [EC:1.14.13.21]	map00944|Flavone and flavonol biosynthesis;map01100|Metabolic pathways;map00941|Flavonoid biosynthesis;map01110|Biosynthesis of secondary metabolites
f5p60_1313_26782	gi|566182998|ref|XM_002312209.2|	2281	E:0	Populus trichocarpa zinc finger family protein (POPTR_0008s08590g) mRNA, complete cds	gi|224101351|ref|XP_002312245.1|	460	E:1e-158	zinc finger family protein [Populus trichocarpa]	SUD1_ARATH	61.2	E:1e-08	RecName: Full=Probable E3 ubiquitin ligase SUD1;^Eukaryota; Viridiplantae; Streptophyta; Embryophyta; Tracheophyta; Spermatophyta; Magnoliophyta; eudicotyledons; Gunneridae; Pentapetalae; rosids; malvids; Brassicales; Brassicaceae; Camelineae; Arabidopsis	SUD1_ARATH	61.2	E:3e-09	RecName: Full=Probable E3 ubiquitin ligase SUD1;^Eukaryota; Viridiplantae; Streptophyta; Embryophyta; Tracheophyta; Spermatophyta; Magnoliophyta; eudicotyledons; Gunneridae; Pentapetalae; rosids; malvids; Brassicales; Brassicaceae; Camelineae; Arabidopsis	PF12906.6	RINGv	RING-variant domain	COG5183	(Membrane-Associated Ring finger (C3HC4))	.	ExpAA=44.30^PredHel=2^Topology=i175-197o212-234i	.	GO:0042335|cuticle development;GO:0010143|cutin biosynthetic process;GO:0008299|isoprenoid biosynthetic process;GO:1900490|positive regulation of hydroxymethylglutaryl-CoA reductase (NADPH) activity;GO:0009414|response to water deprivation;GO:0010345|suberin biosynthetic process;GO:0030433|ubiquitin-dependent ERAD pathway;GO:0010025|wax biosynthetic process	GO:1904264|ubiquitin protein ligase activity involved in ERAD pathway;GO:0004842|ubiquitin-protein transferase activity;GO:0008270|zinc ion bindingGO:0008270|zinc ion binding	GO:0030176|integral component of endoplasmic reticulum membrane	K10661|MARCH6, DOA10; E3 ubiquitin-protein ligase MARCH6 [EC:2.3.2.27]	map04141|Protein processing in endoplasmic reticulum
f2p60_1736_5661	gi|566164849|ref|XM_002305770.2|	2985	E:0	Populus trichocarpa hypothetical protein (POPTR_0004s04190g) mRNA, complete cds	gi|566164850|ref|XP_002305806.2|	889	E:0	hypothetical protein POPTR_0004s04190g [Populus trichocarpa]	ALN_ARATH	674	E:0	RecName: Full=Allantoinase;^Eukaryota; Viridiplantae; Streptophyta; Embryophyta; Tracheophyta; Spermatophyta; Magnoliophyta; eudicotyledons; Gunneridae; Pentapetalae; rosids; malvids; Brassicales; Brassicaceae; Camelineae; Arabidopsis	ALN_ARATH	744	E:0	RecName: Full=Allantoinase;^Eukaryota; Viridiplantae; Streptophyta; Embryophyta; Tracheophyta; Spermatophyta; Magnoliophyta; eudicotyledons; Gunneridae; Pentapetalae; rosids; malvids; Brassicales; Brassicaceae; Camelineae; Arabidopsis	PF01979.19	Amidohydro_1	Amidohydrolase family	COG0044	Dihydroorotase	.	ExpAA=20.40^PredHel=1^Topology=i12-31o	.	GO:0000256|allantoin catabolic process;GO:0006995|cellular response to nitrogen starvation;GO:0006145|purine nucleobase catabolic process;GO:0010136|ureide catabolic process	GO:0004038|allantoinase activity;GO:0050897|cobalt ion binding;GO:0008270|zinc ion bindingGO:0016787|hydrolase activity	GO:0005783|endoplasmic reticulum	K01466|allB; allantoinase [EC:3.5.2.5]	map01100|Metabolic pathways;map01120|Microbial metabolism in diverse environments;map00230|Purine metabolism
f3p22_4425_219	gi|566188489|ref|XM_002314297.2|	7125	E:0	Populus trichocarpa hypothetical protein (POPTR_0010s00540g) mRNA, complete cds	gi|566188490|ref|XP_002314333.2|	2345	E:0	hypothetical protein POPTR_0010s00540g [Populus trichocarpa]	AB21B_ARATH	1612	E:0	RecName: Full=ABC transporter B family member 21;^Eukaryota; Viridiplantae; Streptophyta; Embryophyta; Tracheophyta; Spermatophyta; Magnoliophyta; eudicotyledons; Gunneridae; Pentapetalae; rosids; malvids; Brassicales; Brassicaceae; Camelineae; Arabidopsis	AB4B_ARATH	1770	E:0	RecName: Full=ABC transporter B family member 4;^Eukaryota; Viridiplantae; Streptophyta; Embryophyta; Tracheophyta; Spermatophyta; Magnoliophyta; eudicotyledons; Gunneridae; Pentapetalae; rosids; malvids; Brassicales; Brassicaceae; Camelineae; Arabidopsis	PF00664.22	ABC_membrane	ABC transporter transmembrane region	COG1132	(ABC) transporter	.	ExpAA=232.86^PredHel=9^Topology=i60-82o112-134i185-204o209-231i288-310o725-747i767-785o861-883i948-970o	.	GO:0010315|auxin efflux;GO:0060919|auxin influx;GO:0009926|auxin polar transport;GO:0009734|auxin-activated signaling pathway;GO:0010540|basipetal auxin transport;GO:0009630|gravitropism;GO:0009733|response to auxin;GO:0009735|response to cytokinin;GO:0048767|root hair elongationGO:0006810|transport;GO:0055085|transmembrane transport	GO:0005524|ATP binding;GO:0010329|auxin efflux transmembrane transporter activity;GO:0010328|auxin influx transmembrane transporter activity;GO:0008559|xenobiotic-transporting ATPase activityGO:0005524|ATP binding;GO:0042626|ATPase activity, coupled to transmembrane movement of substances;GO:0016887|ATPase activity	GO:0016021|integral component of membrane;GO:0016020|membrane;GO:0005886|plasma membrane;GO:0009506|plasmodesmaGO:0016021|integral component of membrane	K05658|ABCB1; ATP-binding cassette, subfamily B (MDR/TAP), member 1 [EC:3.6.3.44]	map02010|ABC transporters;map05206|MicroRNAs in cancer;map04976|Bile secretion
f3p51_1366_26132	gi|566190960|ref|XM_002314905.2|	2283	E:0	Populus trichocarpa ubiquitin-conjugating enzyme family protein (POPTR_0010s15390g) mRNA, complete cds	gi|224108707|ref|XP_002314941.1|	598	E:0	ubiquitin-conjugating enzyme family protein [Populus trichocarpa]	UBC32_ARATH	387	E:1e-130	RecName: Full=Ubiquitin-conjugating enzyme E2 32;^Eukaryota; Viridiplantae; Streptophyta; Embryophyta; Tracheophyta; Spermatophyta; Magnoliophyta; eudicotyledons; Gunneridae; Pentapetalae; rosids; malvids; Brassicales; Brassicaceae; Camelineae; Arabidopsis	UBC32_ARATH	397	E:7e-137	RecName: Full=Ubiquitin-conjugating enzyme E2 32;^Eukaryota; Viridiplantae; Streptophyta; Embryophyta; Tracheophyta; Spermatophyta; Magnoliophyta; eudicotyledons; Gunneridae; Pentapetalae; rosids; malvids; Brassicales; Brassicaceae; Camelineae; Arabidopsis	PF00179.25	UQ_con	Ubiquitin-conjugating enzyme	COG5078	ubiquitin-conjugating enzyme	.	ExpAA=19.74^PredHel=1^Topology=i274-291o	.	GO:0006511|ubiquitin-dependent protein catabolic process	GO:0005524|ATP binding;GO:0061630|ubiquitin protein ligase activity;GO:0031625|ubiquitin protein ligase binding;GO:0004842|ubiquitin-protein transferase activity	GO:0005783|endoplasmic reticulum;GO:0016021|integral component of membrane;GO:0016020|membrane;GO:0048471|perinuclear region of cytoplasm	K10578|UBE2J1, NCUBE1, UBC6; ubiquitin-conjugating enzyme E2 J1 [EC:2.3.2.23]	map04141|Protein processing in endoplasmic reticulum;map05012|Parkinson's disease;map04120|Ubiquitin mediated proteolysis
f2p38_3688_728	gi|743917853|ref|XM_011004618.1|	6087	E:0	PREDICTED: Populus euphratica protein EIN4-like (LOC105109801), mRNA	gi|566224858|ref|XP_006370968.1|	1545	E:0	putative ethylene receptor family protein [Populus trichocarpa]	EIN4_ARATH	959	E:0	RecName: Full=Protein EIN4;^Eukaryota; Viridiplantae; Streptophyta; Embryophyta; Tracheophyta; Spermatophyta; Magnoliophyta; eudicotyledons; Gunneridae; Pentapetalae; rosids; malvids; Brassicales; Brassicaceae; Camelineae; Arabidopsis	EIN4_ARATH	965	E:0	RecName: Full=Protein EIN4;^Eukaryota; Viridiplantae; Streptophyta; Embryophyta; Tracheophyta; Spermatophyta; Magnoliophyta; eudicotyledons; Gunneridae; Pentapetalae; rosids; malvids; Brassicales; Brassicaceae; Camelineae; Arabidopsis	PF01590.25	GAF	GAF domain	ENOG410ZMP5	HisKA	.	ExpAA=71.68^PredHel=3^Topology=i51-68o78-100i112-134o	.	GO:0010105|negative regulation of ethylene-activated signaling pathwayGO:0000160|phosphorelay signal transduction system	GO:0005524|ATP binding;GO:0051740|ethylene binding;GO:0038199|ethylene receptor activity;GO:0046872|metal ion binding;GO:0000155|phosphorelay sensor kinase activity;GO:0004674|protein serine/threonine kinase activity;GO:0004872|receptor activityGO:0005515|protein binding	GO:0005783|endoplasmic reticulum;GO:0005789|endoplasmic reticulum membrane;GO:0016021|integral component of membrane	K14509|ETR, ERS; ethylene receptor [EC:2.7.13.-]	map04075|Plant hormone signal transduction
f2p60_4237_17988	gi|566188376|ref|XM_002312768.2|	7696	E:0	Populus trichocarpa hypothetical protein (POPTR_0009s16840g) mRNA, complete cds	gi|566188377|ref|XP_002312804.2|	2166	E:0	hypothetical protein POPTR_0009s16840g [Populus trichocarpa]	NPC1_HUMAN	579	E:0	RecName: Full=Niemann-Pick C1 protein;^Eukaryota; Metazoa; Chordata; Craniata; Vertebrata; Euteleostomi; Mammalia; Eutheria; Euarchontoglires; Primates; Haplorrhini; Catarrhini; Hominidae; Homo	NPC1_HUMAN	736	E:0	RecName: Full=Niemann-Pick C1 protein;^Eukaryota; Metazoa; Chordata; Craniata; Vertebrata; Euteleostomi; Mammalia; Eutheria; Euarchontoglires; Primates; Haplorrhini; Catarrhini; Hominidae; Homo	PF16414.4	NPC1_N	Niemann-Pick C1 N terminus	ENOG410XR54	Niemann-Pick disease type C1	.	ExpAA=290.20^PredHel=13^Topology=o265-287i352-374o599-621i633-655o665-687i707-729o739-761i809-831o1086-1108i1113-1135o1145-1167i1188-1205o1220-1242i	.	GO:0007628|adult walking behavior;GO:0006914|autophagy;GO:0008206|bile acid metabolic process;GO:0071404|cellular response to low-density lipoprotein particle stimulus;GO:0071383|cellular response to steroid hormone stimulus;GO:0033344|cholesterol efflux;GO:0042632|cholesterol homeostasis;GO:0008203|cholesterol metabolic process;GO:0030301|cholesterol transport;GO:0006897|endocytosis;GO:0090150|e…	GO:0015485|cholesterol binding;GO:0004872|receptor activity;GO:0015248|sterol transporter activity;GO:0004888|transmembrane signaling receptor activity;GO:0001618|virus receptor activity	GO:0005783|endoplasmic reticulum;GO:0070062|extracellular exosome;GO:0005576|extracellular region;GO:0005794|Golgi apparatus;GO:0016021|integral component of membrane;GO:0005887|integral component of plasma membrane;GO:0031902|late endosome membrane;GO:0005765|lysosomal membrane;GO:0005764|lysosome;GO:0016020|membrane;GO:0045121|membrane raft;GO:0005635|nuclear envelope;GO:0048471|perinuclear reg…	K12385|NPC1; Niemann-Pick C1 protein	map04142|Lysosome
f5p60_1678_23984	gi|566149457|ref|XM_006369072.1|	2948	E:0	Populus trichocarpa hypothetical protein (POPTR_0001s16790g) mRNA, complete cds	gi|743878761|ref|XP_011035731.1|	964	E:0	PREDICTED: cytochrome P450 71A1-like [Populus euphratica]	C71A1_PERAE	370	E:6e-120	RecName: Full=Cytochrome P450 71A1;^Eukaryota; Viridiplantae; Streptophyta; Embryophyta; Tracheophyta; Spermatophyta; Magnoliophyta; Magnoliidae; Laurales; Lauraceae; Persea	F3PH_ARATH	399	E:2e-131	RecName: Full=Flavonoid 3'-monooxygenase;^Eukaryota; Viridiplantae; Streptophyta; Embryophyta; Tracheophyta; Spermatophyta; Magnoliophyta; eudicotyledons; Gunneridae; Pentapetalae; rosids; malvids; Brassicales; Brassicaceae; Camelineae; Arabidopsis	PF00067.21	p450	Cytochrome P450	COG2124	Cytochrome p450	.	ExpAA=25.97^PredHel=1^Topology=o20-37i	.	GO:0009813|flavonoid biosynthetic process;GO:0009733|response to auxin;GO:0044550|secondary metabolite biosynthetic processGO:0055114|oxidation-reduction process	GO:0016711|flavonoid 3'-monooxygenase activity;GO:0020037|heme binding;GO:0005506|iron ion bindingGO:0005506|iron ion binding;GO:0016705|oxidoreductase activity, acting on paired donors, with incorporation or reduction of molecular oxygen;GO:0020037|heme binding	GO:0005789|endoplasmic reticulum membrane;GO:0016021|integral component of membrane;GO:0016020|membrane	K05280|E1.14.13.21; flavonoid 3'-monooxygenase [EC:1.14.13.21]	map00944|Flavone and flavonol biosynthesis;map01100|Metabolic pathways;map00941|Flavonoid biosynthesis;map01110|Biosynthesis of secondary metabolites
f3p60_734_13733	gi|118487353|gb|EF147492.1|	1253	E:0	Populus trichocarpa clone WS01231_M22 unknown mRNA	gi|224105181|ref|XP_002313717.1|	164	E:5e-69	putative actin-depolymerizing factor family protein [Populus trichocarpa]	ADF5_ARATH	154	E:4e-58	RecName: Full=Actin-depolymerizing factor 5;^Eukaryota; Viridiplantae; Streptophyta; Embryophyta; Tracheophyta; Spermatophyta; Magnoliophyta; eudicotyledons; Gunneridae; Pentapetalae; rosids; malvids; Brassicales; Brassicaceae; Camelineae; Arabidopsis	ADF5_ARATH	108	E:3e-29	RecName: Full=Actin-depolymerizing factor 5;^Eukaryota; Viridiplantae; Streptophyta; Embryophyta; Tracheophyta; Spermatophyta; Magnoliophyta; eudicotyledons; Gunneridae; Pentapetalae; rosids; malvids; Brassicales; Brassicaceae; Camelineae; Arabidopsis	PF00241.19	Cofilin_ADF	Cofilin/tropomyosin-type actin-binding protein	ENOG41122P5	actin-depolymerizing factor	.	ExpAA=20.65^PredHel=1^Topology=o61-83i	.	GO:0030042|actin filament depolymerization	GO:0003779|actin bindingGO:0003779|actin binding	GO:0015629|actin cytoskeleton;GO:0005737|cytoplasmGO:0005622|intracellular	K05765|CFL; cofilin	map05133|Pertussis;map04360|Axon guidance;map04666|Fc gamma R-mediated phagocytosis;map04810|Regulation of actin cytoskeleton
f3p60_1681_23912	gi|224113246|ref|XM_002316399.1|	3000	E:0	Populus trichocarpa putative delta-7-sterol reductase family protein (POPTR_0010s25970g) mRNA, complete cds	gi|224113247|ref|XP_002316435.1|	870	E:0	putative delta-7-sterol reductase family protein [Populus trichocarpa]	ST7R_ARATH	766	E:0	RecName: Full=7-dehydrocholesterol reductase;^Eukaryota; Viridiplantae; Streptophyta; Embryophyta; Tracheophyta; Spermatophyta; Magnoliophyta; eudicotyledons; Gunneridae; Pentapetalae; rosids; malvids; Brassicales; Brassicaceae; Camelineae; Arabidopsis	ST7R_ARATH	791	E:0	RecName: Full=7-dehydrocholesterol reductase;^Eukaryota; Viridiplantae; Streptophyta; Embryophyta; Tracheophyta; Spermatophyta; Magnoliophyta; eudicotyledons; Gunneridae; Pentapetalae; rosids; malvids; Brassicales; Brassicaceae; Camelineae; Arabidopsis	PF01222.16	ERG4_ERG24	Ergosterol biosynthesis ERG4/ERG24 family	ENOG410XP67	)-reductase	.	ExpAA=193.92^PredHel=8^Topology=o10-32i109-128o138-157i197-214o229-251i263-285o289-311i373-395o	.	GO:0016132|brassinosteroid biosynthetic process;GO:0006695|cholesterol biosynthetic process	GO:0047598|7-dehydrocholesterol reductase activity;GO:0009918|sterol delta7 reductase activity	GO:0005789|endoplasmic reticulum membrane;GO:0005794|Golgi apparatus;GO:0016021|integral component of membrane;GO:0005886|plasma membraneGO:0016020|membrane	K00213|DHCR7; 7-dehydrocholesterol reductase [EC:1.3.1.21]	map00100|Steroid biosynthesis;map01100|Metabolic pathways;map01110|Biosynthesis of secondary metabolites
f15p60_739_33357	gi|566155398|ref|XM_002299044.2|	1269	E:0	Populus trichocarpa Photosystem I reaction center subunit V family protein (POPTR_0001s47590g) mRNA, complete cds	gi|224056901|ref|XP_002299080.1|	327	E:3e-111	Photosystem I reaction center subunit V family protein [Populus trichocarpa]	PSAG_ARATH	210	E:8e-67	RecName: Full=Photosystem I reaction center subunit V, chloroplastic;^Eukaryota; Viridiplantae; Streptophyta; Embryophyta; Tracheophyta; Spermatophyta; Magnoliophyta; eudicotyledons; Gunneridae; Pentapetalae; rosids; malvids; Brassicales; Brassicaceae; Camelineae; Arabidopsis	PSAG_ARATH	211	E:3e-68	RecName: Full=Photosystem I reaction center subunit V, chloroplastic;^Eukaryota; Viridiplantae; Streptophyta; Embryophyta; Tracheophyta; Spermatophyta; Magnoliophyta; eudicotyledons; Gunneridae; Pentapetalae; rosids; malvids; Brassicales; Brassicaceae; Camelineae; Arabidopsis	PF01241.17	PSI_PSAK	Photosystem I psaG / psaK	ENOG41120CZ	photosystem I reaction center subunit V	.	ExpAA=40.74^PredHel=2^Topology=o58-80i120-142o	.	GO:0015979|photosynthesis;GO:0009773|photosynthetic electron transport in photosystem I;GO:0009780|photosynthetic NADP+ reduction;GO:0042550|photosystem I stabilization;GO:0050821|protein stabilizationGO:0015979|photosynthesis	GO:0016168|chlorophyll binding	GO:0009507|chloroplast;GO:0009941|chloroplast envelope;GO:0031969|chloroplast membrane;GO:0030093|chloroplast photosystem I;GO:0009534|chloroplast thylakoid;GO:0009535|chloroplast thylakoid membrane;GO:0016021|integral component of membrane;GO:0009579|thylakoidGO:0009522|photosystem I;GO:0016020|membrane	K08905|psaG; photosystem I subunit V	map01100|Metabolic pathways;map00195|Photosynthesis
f7p60_1726_5704	gi|566201708|ref|XM_002319968.2|	3007	E:0	Populus trichocarpa hypothetical protein (POPTR_0014s00900g) mRNA, complete cds	gi|566201709|ref|XP_002320004.2|	842	E:0	hypothetical protein POPTR_0014s00900g [Populus trichocarpa]	HHP4_ARATH	634	E:0	RecName: Full=Heptahelical transmembrane protein 4;^Eukaryota; Viridiplantae; Streptophyta; Embryophyta; Tracheophyta; Spermatophyta; Magnoliophyta; eudicotyledons; Gunneridae; Pentapetalae; rosids; malvids; Brassicales; Brassicaceae; Camelineae; Arabidopsis	HHP4_ARATH	634	E:0	RecName: Full=Heptahelical transmembrane protein 4;^Eukaryota; Viridiplantae; Streptophyta; Embryophyta; Tracheophyta; Spermatophyta; Magnoliophyta; eudicotyledons; Gunneridae; Pentapetalae; rosids; malvids; Brassicales; Brassicaceae; Camelineae; Arabidopsis	PF03006.19	HlyIII	Haemolysin-III related	COG1272	Channel protein (Hemolysin III family	.	ExpAA=145.35^PredHel=7^Topology=i82-104o213-235i247-269o273-295i308-330o335-357i378-400o	.	GO:0009725|response to hormone;GO:0009744|response to sucrose	GO:0004872|receptor activity	GO:0016021|integral component of membraneGO:0016021|integral component of membrane	K07297|ADIPOR; adiponectin receptor	map04152|AMPK signaling pathway;map04932|Non-alcoholic fatty liver disease (NAFLD);map04920|Adipocytokine signaling pathway
f2p60_2430_2923	gi|566213395|ref|XM_006373464.1|	4041	E:0	Populus trichocarpa amino acid transporter family protein (POPTR_0017s14530g) mRNA, complete cds	gi|566213396|ref|XP_006373526.1|	828	E:0	amino acid transporter family protein [Populus trichocarpa]	AVT6A_ARATH	626	E:0	RecName: Full=Amino acid transporter AVT6A {ECO:0000305};^Eukaryota; Viridiplantae; Streptophyta; Embryophyta; Tracheophyta; Spermatophyta; Magnoliophyta; eudicotyledons; Gunneridae; Pentapetalae; rosids; malvids; Brassicales; Brassicaceae; Camelineae; Arabidopsis	AVT6A_ARATH	703	E:0	RecName: Full=Amino acid transporter AVT6A {ECO:0000305};^Eukaryota; Viridiplantae; Streptophyta; Embryophyta; Tracheophyta; Spermatophyta; Magnoliophyta; eudicotyledons; Gunneridae; Pentapetalae; rosids; malvids; Brassicales; Brassicaceae; Camelineae; Arabidopsis	PF01490.17	Aa_trans	Transmembrane amino acid transporter protein	COG0814	amino acid transport	.	ExpAA=240.16^PredHel=11^Topology=i39-61o71-93i119-141o166-188i201-223o238-260i281-303o326-348i368-390o395-414i427-449o	.	GO:0003333|amino acid transmembrane transportGO:0003333|amino acid transmembrane transport	GO:0015171|amino acid transmembrane transporter activity	GO:0016021|integral component of membrane;GO:0005774|vacuolar membrane;GO:0005773|vacuole	K14207|SLC38A2, SNAT2; solute carrier family 38 (sodium-coupled neutral amino acid transporter), member 2	map04974|Protein digestion and absorption;map04724|Glutamatergic synapse;map04727|GABAergic synapse
f2p23_2072_3984	gi|566158068|ref|XM_002301244.2|	3714	E:0	Populus trichocarpa hypothetical protein (POPTR_0002s14750g) mRNA, complete cds	gi|566158069|ref|XP_002301280.2|	832	E:0	hypothetical protein POPTR_0002s14750g [Populus trichocarpa]	GAE2_ARATH	724	E:0	RecName: Full=UDP-glucuronate 4-epimerase 2;^Eukaryota; Viridiplantae; Streptophyta; Embryophyta; Tracheophyta; Spermatophyta; Magnoliophyta; eudicotyledons; Gunneridae; Pentapetalae; rosids; malvids; Brassicales; Brassicaceae; Camelineae; Arabidopsis	GAE3_ARATH	764	E:0	RecName: Full=UDP-glucuronate 4-epimerase 3;^Eukaryota; Viridiplantae; Streptophyta; Embryophyta; Tracheophyta; Spermatophyta; Magnoliophyta; eudicotyledons; Gunneridae; Pentapetalae; rosids; malvids; Brassicales; Brassicaceae; Camelineae; Arabidopsis	PF01370.20	Epimerase	NAD dependent epimerase/dehydratase family	COG0451	Nad-dependent epimerase dehydratase	.	ExpAA=40.71^PredHel=2^Topology=o27-49i95-114o	.	GO:0005975|carbohydrate metabolic processGO:0006694|steroid biosynthetic process;GO:0055114|oxidation-reduction process	GO:0050378|UDP-glucuronate 4-epimerase activityGO:0003824|catalytic activity;GO:0050662|coenzyme binding;GO:0003854|3-beta-hydroxy-delta5-steroid dehydrogenase activity;GO:0016616|oxidoreductase activity, acting on the CH-OH group of donors, NAD or NADP as acceptor	GO:0032580|Golgi cisterna membrane;GO:0016021|integral component of membrane;GO:0016020|membrane	K08679|E5.1.3.6; UDP-glucuronate 4-epimerase [EC:5.1.3.6]	map01100|Metabolic pathways;map00500|Starch and sucrose metabolism;map00520|Amino sugar and nucleotide sugar metabolism
f2p60_1839_22922	gi|566147962|ref|XM_002298038.2|	3217	E:0	Populus trichocarpa glucose-methanol-choline oxidoreductase family protein (POPTR_0001s08620g) mRNA, complete cds	gi|224053991|ref|XP_002298074.1|	1186	E:0	glucose-methanol-choline oxidoreductase family protein [Populus trichocarpa]	HTH_ARATH	621	E:0	RecName: Full=Protein HOTHEAD;^Eukaryota; Viridiplantae; Streptophyta; Embryophyta; Tracheophyta; Spermatophyta; Magnoliophyta; eudicotyledons; Gunneridae; Pentapetalae; rosids; malvids; Brassicales; Brassicaceae; Camelineae; Arabidopsis	HTH_ARATH	621	E:0	RecName: Full=Protein HOTHEAD;^Eukaryota; Viridiplantae; Streptophyta; Embryophyta; Tracheophyta; Spermatophyta; Magnoliophyta; eudicotyledons; Gunneridae; Pentapetalae; rosids; malvids; Brassicales; Brassicaceae; Camelineae; Arabidopsis	PF00732.18	GMC_oxred_N	GMC oxidoreductase	COG2303	oxidoreductase	.	ExpAA=25.90^PredHel=1^Topology=i5-24o	.	GO:0007267|cell-cell signaling;GO:0009553|embryo sac development;GO:0010430|fatty acid omega-oxidationGO:0055114|oxidation-reduction process	GO:0050660|flavin adenine dinucleotide binding;GO:0046593|mandelonitrile lyase activity;GO:0016614|oxidoreductase activity, acting on CH-OH group of donorsGO:0016614|oxidoreductase activity, acting on CH-OH group of donors;GO:0050660|flavin adenine dinucleotide binding	GO:0005576|extracellular region	K15403|ACE, HTH; fatty acid omega-hydroxy dehydrogenase [EC:1.1.-.-]	map00073|Cutin, suberine and wax biosynthesis
f2p60_930_30806	gi|566206691|ref|XM_002321570.2|	1596	E:0	Populus trichocarpa hypothetical protein (POPTR_0015s08910g) mRNA, complete cds	gi|566206692|ref|XP_002321606.2|	357	E:3e-120	hypothetical protein POPTR_0015s08910g [Populus trichocarpa]	HSP7J_ARATH	93.6	E:1e-19	RecName: Full=Heat shock 70 kDa protein 10, mitochondrial;^Eukaryota; Viridiplantae; Streptophyta; Embryophyta; Tracheophyta; Spermatophyta; Magnoliophyta; eudicotyledons; Gunneridae; Pentapetalae; rosids; malvids; Brassicales; Brassicaceae; Camelineae; Arabidopsis	HSP7J_ARATH	114	E:1e-27	RecName: Full=Heat shock 70 kDa protein 10, mitochondrial;^Eukaryota; Viridiplantae; Streptophyta; Embryophyta; Tracheophyta; Spermatophyta; Magnoliophyta; eudicotyledons; Gunneridae; Pentapetalae; rosids; malvids; Brassicales; Brassicaceae; Camelineae; Arabidopsis	PF00012.19	HSP70	Hsp70 protein	COG0443	Heat shock protein	.	ExpAA=46.47^PredHel=2^Topology=i150-172o182-201i	.	GO:0006457|protein folding;GO:0046686|response to cadmium ion;GO:0009408|response to heat;GO:0009651|response to salt stress;GO:0009615|response to virus	GO:0005524|ATP binding;GO:0051082|unfolded protein bindingGO:0016627|oxidoreductase activity, acting on the CH-CH group of donors	GO:0005618|cell wall;GO:0009507|chloroplast;GO:0005739|mitochondrion;GO:0005774|vacuolar membrane	K03283|HSPA1_8; heat shock 70kDa protein 1/8	map04915|Estrogen signaling pathway;map04141|Protein processing in endoplasmic reticulum;map04144|Endocytosis;map03040|Spliceosome;map04010|MAPK signaling pathway;map05134|Legionellosis;map05164|Influenza A;map05162|Measles;map05145|Toxoplasmosis;map04612|Antigen processing and presentation;map05169|Epstein-Barr virus infection
f2p28_3480_18618	gi|743912043|ref|XM_011001591.1|	5960	E:0	PREDICTED: Populus euphratica calcium-transporting ATPase 3, endoplasmic reticulum-type (LOC105107602), transcript variant X1, mRNA	gi|743912044|ref|XP_010999893.1|	1919	E:0	PREDICTED: calcium-transporting ATPase 3, endoplasmic reticulum-type [Populus euphratica]	ECA3_ARATH	1660	E:0	RecName: Full=Calcium-transporting ATPase 3, endoplasmic reticulum-type;^Eukaryota; Viridiplantae; Streptophyta; Embryophyta; Tracheophyta; Spermatophyta; Magnoliophyta; eudicotyledons; Gunneridae; Pentapetalae; rosids; malvids; Brassicales; Brassicaceae; Camelineae; Arabidopsis	ECA3_ARATH	1751	E:0	RecName: Full=Calcium-transporting ATPase 3, endoplasmic reticulum-type;^Eukaryota; Viridiplantae; Streptophyta; Embryophyta; Tracheophyta; Spermatophyta; Magnoliophyta; eudicotyledons; Gunneridae; Pentapetalae; rosids; malvids; Brassicales; Brassicaceae; Camelineae; Arabidopsis	PF00690.25	Cation_ATPase_N	Cation transporter/ATPase, N-terminus	COG0474	P-type atpase	.	ExpAA=196.58^PredHel=8^Topology=i60-79o84-106i253-275o295-317i751-773o777-799i822-844o915-937i	.	GO:0006816|calcium ion transport;GO:0055071|manganese ion homeostasis;GO:0048364|root development	GO:0005524|ATP binding;GO:0005388|calcium-transporting ATPase activity;GO:0015410|manganese-transporting ATPase activity;GO:0046872|metal ion binding	GO:0012505|endomembrane system;GO:0005768|endosome;GO:0005794|Golgi apparatus;GO:0000139|Golgi membrane;GO:0016021|integral component of membrane;GO:0031902|late endosome membrane;GO:0005802|trans-Golgi network	K01537|E3.6.3.8; Ca2+-transporting ATPase [EC:3.6.3.8]	map04742|Taste transduction;map00230|Purine metabolism
f2p60_4207_17995	gi|566173519|ref|XM_002307757.2|	7589	E:0	Populus trichocarpa patched family protein (POPTR_0005s27320g) mRNA, complete cds	gi|566173520|ref|XP_002307793.2|	2467	E:0	patched family protein [Populus trichocarpa]	NPC1_PIG	642	E:0	RecName: Full=Niemann-Pick C1 protein;^Eukaryota; Metazoa; Chordata; Craniata; Vertebrata; Euteleostomi; Mammalia; Eutheria; Laurasiatheria; Cetartiodactyla; Suina; Suidae; Sus	NPC1_PIG	770	E:0	RecName: Full=Niemann-Pick C1 protein;^Eukaryota; Metazoa; Chordata; Craniata; Vertebrata; Euteleostomi; Mammalia; Eutheria; Laurasiatheria; Cetartiodactyla; Suina; Suidae; Sus	PF16414.4	NPC1_N	Niemann-Pick C1 N terminus	ENOG410XR54	Niemann-Pick disease type C1	.	ExpAA=299.17^PredHel=14^Topology=o15-34i294-316o381-403i635-654o669-691i698-720o740-762i775-797o846-868i1127-1149o1153-1175i1182-1204o1219-1241i1248-1270o	.	GO:0008206|bile acid metabolic process;GO:0042632|cholesterol homeostasis;GO:0008203|cholesterol metabolic process;GO:0030301|cholesterol transport;GO:0007041|lysosomal transport;GO:0006486|protein glycosylation	GO:0015485|cholesterol binding;GO:0005319|lipid transporter activity	GO:0005783|endoplasmic reticulum;GO:0005576|extracellular region;GO:0005887|integral component of plasma membrane;GO:0031902|late endosome membrane;GO:0005765|lysosomal membrane;GO:0005764|lysosome;GO:0005635|nuclear envelope;GO:0048471|perinuclear region of cytoplasmGO:0016021|integral component of membrane	K12385|NPC1; Niemann-Pick C1 protein	map04142|Lysosome
f2p18_2206_3565	gi|566204845|ref|XM_002321212.2|	3195	E:0	Populus trichocarpa ent-kaurenoic acid oxidase family protein (POPTR_0014s17720g) mRNA, complete cds	gi|566204846|ref|XP_002321248.2|	963	E:0	ent-kaurenoic acid oxidase family protein [Populus trichocarpa]	KAO1_ARATH	629	E:0	RecName: Full=Ent-kaurenoic acid oxidase 1;^Eukaryota; Viridiplantae; Streptophyta; Embryophyta; Tracheophyta; Spermatophyta; Magnoliophyta; eudicotyledons; Gunneridae; Pentapetalae; rosids; malvids; Brassicales; Brassicaceae; Camelineae; Arabidopsis	KAO1_ARATH	632	E:0	RecName: Full=Ent-kaurenoic acid oxidase 1;^Eukaryota; Viridiplantae; Streptophyta; Embryophyta; Tracheophyta; Spermatophyta; Magnoliophyta; eudicotyledons; Gunneridae; Pentapetalae; rosids; malvids; Brassicales; Brassicaceae; Camelineae; Arabidopsis	PF00067.21	p450	Cytochrome P450	COG2124	Cytochrome p450	.	ExpAA=40.63^PredHel=2^Topology=i5-24o447-469i	.	GO:0016132|brassinosteroid biosynthetic process;GO:0010268|brassinosteroid homeostasis;GO:0009686|gibberellin biosynthetic process;GO:0007275|multicellular organism development;GO:0016125|sterol metabolic processGO:0055114|oxidation-reduction process	GO:0051777|ent-kaurenoate oxidase activity;GO:0020037|heme binding;GO:0005506|iron ion bindingGO:0005506|iron ion binding;GO:0016705|oxidoreductase activity, acting on paired donors, with incorporation or reduction of molecular oxygen;GO:0020037|heme binding	GO:0005783|endoplasmic reticulum;GO:0005789|endoplasmic reticulum membrane;GO:0016021|integral component of membrane	K04123|KAO; ent-kaurenoic acid hydroxylase [EC:1.14.13.79]	map01100|Metabolic pathways;map01110|Biosynthesis of secondary metabolites;map00904|Diterpenoid biosynthesis
f2p60_1644_6299	gi|566181569|ref|XM_002311866.2|	2736	E:0	Populus trichocarpa putative delta-7-sterol reductase family protein (POPTR_0008s00580g) mRNA, complete cds	gi|743868652|ref|XP_011033056.1|	891	E:0	PREDICTED: 7-dehydrocholesterol reductase-like [Populus euphratica]	ST7R_ARATH	753	E:0	RecName: Full=7-dehydrocholesterol reductase;^Eukaryota; Viridiplantae; Streptophyta; Embryophyta; Tracheophyta; Spermatophyta; Magnoliophyta; eudicotyledons; Gunneridae; Pentapetalae; rosids; malvids; Brassicales; Brassicaceae; Camelineae; Arabidopsis	ST7R_ARATH	783	E:0	RecName: Full=7-dehydrocholesterol reductase;^Eukaryota; Viridiplantae; Streptophyta; Embryophyta; Tracheophyta; Spermatophyta; Magnoliophyta; eudicotyledons; Gunneridae; Pentapetalae; rosids; malvids; Brassicales; Brassicaceae; Camelineae; Arabidopsis	PF01222.16	ERG4_ERG24	Ergosterol biosynthesis ERG4/ERG24 family	ENOG410XP67	)-reductase	.	ExpAA=178.70^PredHel=8^Topology=o10-32i108-127o137-157i197-214o229-251i263-285o289-311i373-395o	.	GO:0016132|brassinosteroid biosynthetic process;GO:0006695|cholesterol biosynthetic process	GO:0047598|7-dehydrocholesterol reductase activity;GO:0009918|sterol delta7 reductase activity	GO:0005789|endoplasmic reticulum membrane;GO:0005794|Golgi apparatus;GO:0016021|integral component of membrane;GO:0005886|plasma membraneGO:0016020|membrane	K00213|DHCR7; 7-dehydrocholesterol reductase [EC:1.3.1.21]	map00100|Steroid biosynthesis;map01100|Metabolic pathways;map01110|Biosynthesis of secondary metabolites
f2p60_1599_24497	gi|743926484|ref|XM_011009105.1|	2723	E:0	PREDICTED: Populus euphratica calreticulin-3-like (LOC105113086), mRNA	gi|743926485|ref|XP_011007407.1|	776	E:0	PREDICTED: calreticulin-3-like [Populus euphratica]	CALR3_ARATH	616	E:0	RecName: Full=Calreticulin-3;^Eukaryota; Viridiplantae; Streptophyta; Embryophyta; Tracheophyta; Spermatophyta; Magnoliophyta; eudicotyledons; Gunneridae; Pentapetalae; rosids; malvids; Brassicales; Brassicaceae; Camelineae; Arabidopsis	CALR3_ARATH	650	E:0	RecName: Full=Calreticulin-3;^Eukaryota; Viridiplantae; Streptophyta; Embryophyta; Tracheophyta; Spermatophyta; Magnoliophyta; eudicotyledons; Gunneridae; Pentapetalae; rosids; malvids; Brassicales; Brassicaceae; Camelineae; Arabidopsis	PF00262.17	Calreticulin	Calreticulin family	ENOG410XRR7	Calreticulin	.	ExpAA=22.33^PredHel=1^Topology=i20-42o	.	GO:0046283|anthocyanin-containing compound metabolic process;GO:0010204|defense response signaling pathway, resistance gene-independent;GO:0042742|defense response to bacterium;GO:0009626|plant-type hypersensitive response;GO:0006457|protein foldingGO:0006457|protein folding	GO:0005509|calcium ion binding;GO:0030246|carbohydrate binding;GO:0051082|unfolded protein bindingGO:0005509|calcium ion binding;GO:0051082|unfolded protein binding	GO:0005783|endoplasmic reticulum;GO:0005788|endoplasmic reticulum lumen;GO:0005789|endoplasmic reticulum membraneGO:0005783|endoplasmic reticulum	K08057|CALR; calreticulin	map04141|Protein processing in endoplasmic reticulum;map05142|Chagas disease (American trypanosomiasis);map05166|HTLV-I infection;map04145|Phagosome;map04612|Antigen processing and presentation
f2p34_3601_18468	gi|566215321|ref|XM_002325093.2|	3265	E:0	Populus trichocarpa cyclic nucleotide-gated ion channel 5 family protein (POPTR_0018s11530g) mRNA, complete cds	gi|566215322|ref|XP_002325129.2|	811	E:0	cyclic nucleotide-gated ion channel 5 family protein [Populus trichocarpa]	CNGC5_ARATH	689	E:0	RecName: Full=Probable cyclic nucleotide-gated ion channel 5;^Eukaryota; Viridiplantae; Streptophyta; Embryophyta; Tracheophyta; Spermatophyta; Magnoliophyta; eudicotyledons; Gunneridae; Pentapetalae; rosids; malvids; Brassicales; Brassicaceae; Camelineae; Arabidopsis	CNGC5_ARATH	748	E:0	RecName: Full=Probable cyclic nucleotide-gated ion channel 5;^Eukaryota; Viridiplantae; Streptophyta; Embryophyta; Tracheophyta; Spermatophyta; Magnoliophyta; eudicotyledons; Gunneridae; Pentapetalae; rosids; malvids; Brassicales; Brassicaceae; Camelineae; Arabidopsis	PF00520.30	Ion_trans	Ion transport protein	ENOG410XPSE	Potassium voltage-gated channel, subfamily H (Eag-related), member	.	ExpAA=46.24^PredHel=2^Topology=i30-52o155-174i	.	GO:0042391|regulation of membrane potentialGO:0006811|ion transport;GO:0055085|transmembrane transport	GO:0005262|calcium channel activity;GO:0005516|calmodulin binding;GO:0030552|cAMP binding;GO:0030553|cGMP binding;GO:0005223|intracellular cGMP activated cation channel activity;GO:0005249|voltage-gated potassium channel activityGO:0005216|ion channel activity;GO:0005515|protein binding	GO:0005887|integral component of plasma membrane;GO:0016020|membrane;GO:0005886|plasma membraneGO:0016020|membrane	K05391|CNGF; cyclic nucleotide gated channel, other eukaryote;K05391|CNGF; cyclic nucleotide gated channel, other eukaryote	map04626|Plant-pathogen interaction;map04626|Plant-pathogen interaction
f2p34_3601_18468	gi|566215321|ref|XM_002325093.2|	3265	E:0	Populus trichocarpa cyclic nucleotide-gated ion channel 5 family protein (POPTR_0018s11530g) mRNA, complete cds	gi|566215322|ref|XP_002325129.2|	811	E:0	cyclic nucleotide-gated ion channel 5 family protein [Populus trichocarpa]	CNGC5_ARATH	689	E:0	RecName: Full=Probable cyclic nucleotide-gated ion channel 5;^Eukaryota; Viridiplantae; Streptophyta; Embryophyta; Tracheophyta; Spermatophyta; Magnoliophyta; eudicotyledons; Gunneridae; Pentapetalae; rosids; malvids; Brassicales; Brassicaceae; Camelineae; Arabidopsis	CNGC6_ARATH	417	E:5e-139	RecName: Full=Probable cyclic nucleotide-gated ion channel 6;^Eukaryota; Viridiplantae; Streptophyta; Embryophyta; Tracheophyta; Spermatophyta; Magnoliophyta; eudicotyledons; Gunneridae; Pentapetalae; rosids; malvids; Brassicales; Brassicaceae; Camelineae; Arabidopsis	PF00520.30	Ion_trans	Ion transport protein	ENOG410XPSE	Potassium voltage-gated channel, subfamily H (Eag-related), member	.	ExpAA=98.20^PredHel=5^Topology=i114-133o148-165i203-222o237-256i277-299o	.	GO:0042391|regulation of membrane potential;GO:0046686|response to cadmium ionGO:0006811|ion transport;GO:0055085|transmembrane transport	GO:0005516|calmodulin binding;GO:0030552|cAMP binding;GO:0030553|cGMP binding;GO:0005223|intracellular cGMP activated cation channel activity;GO:0005249|voltage-gated potassium channel activityGO:0005216|ion channel activity	GO:0071944|cell periphery;GO:0005887|integral component of plasma membrane;GO:0005886|plasma membraneGO:0016020|membrane	K05391|CNGF; cyclic nucleotide gated channel, other eukaryote;K05391|CNGF; cyclic nucleotide gated channel, other eukaryote	map04626|Plant-pathogen interaction;map04626|Plant-pathogen interaction
f3p60_2011_21802	gi|566150657|ref|XM_006369427.1|	3314	E:0	Populus trichocarpa hypothetical protein (POPTR_0001s23910g) mRNA, complete cds	gi|566150658|ref|XP_006369489.1|	1042	E:0	hypothetical protein POPTR_0001s23910g [Populus trichocarpa]	HEXO2_ARATH	775	E:0	RecName: Full=Beta-hexosaminidase 2;^Eukaryota; Viridiplantae; Streptophyta; Embryophyta; Tracheophyta; Spermatophyta; Magnoliophyta; eudicotyledons; Gunneridae; Pentapetalae; rosids; malvids; Brassicales; Brassicaceae; Camelineae; Arabidopsis	HEXO2_ARATH	809	E:0	RecName: Full=Beta-hexosaminidase 2;^Eukaryota; Viridiplantae; Streptophyta; Embryophyta; Tracheophyta; Spermatophyta; Magnoliophyta; eudicotyledons; Gunneridae; Pentapetalae; rosids; malvids; Brassicales; Brassicaceae; Camelineae; Arabidopsis	PF14845.5	Glycohydro_20b2	beta-acetyl hexosaminidase like	COG3525	ec 3.2.1.52	.	ExpAA=22.80^PredHel=1^Topology=i36-58o	.	GO:0005975|carbohydrate metabolic processGO:0005975|carbohydrate metabolic process	GO:0004563|beta-N-acetylhexosaminidase activity;GO:0015929|hexosaminidase activity;GO:0035251|UDP-glucosyltransferase activityGO:0004553|hydrolase activity, hydrolyzing O-glycosyl compounds	GO:0005886|plasma membrane	K12373|HEXA_B; hexosaminidase [EC:3.2.1.52]	map04142|Lysosome;map00511|Other glycan degradation;map00531|Glycosaminoglycan degradation;map00604|Glycosphingolipid biosynthesis - ganglio series;map00520|Amino sugar and nucleotide sugar metabolism;map01100|Metabolic pathways;map00603|Glycosphingolipid biosynthesis - globo series
f2p40_1657_24148	gi|566200720|ref|XM_006376214.1|	2844	E:0	Populus trichocarpa thioredoxin family protein (POPTR_0013s11580g) mRNA, complete cds	gi|566200721|ref|XP_006376276.1|	795	E:0	thioredoxin family protein [Populus trichocarpa]	PDI52_ARATH	540	E:0	RecName: Full=Protein disulfide-isomerase 5-2;^Eukaryota; Viridiplantae; Streptophyta; Embryophyta; Tracheophyta; Spermatophyta; Magnoliophyta; eudicotyledons; Gunneridae; Pentapetalae; rosids; malvids; Brassicales; Brassicaceae; Camelineae; Arabidopsis	PDI52_ARATH	555	E:0	RecName: Full=Protein disulfide-isomerase 5-2;^Eukaryota; Viridiplantae; Streptophyta; Embryophyta; Tracheophyta; Spermatophyta; Magnoliophyta; eudicotyledons; Gunneridae; Pentapetalae; rosids; malvids; Brassicales; Brassicaceae; Camelineae; Arabidopsis	PF00085.19	Thioredoxin	Thioredoxin	COG0526	Thioredoxin	.	ExpAA=22.98^PredHel=1^Topology=o371-390i	.	GO:0045454|cell redox homeostasis;GO:0006457|protein folding;GO:0034976|response to endoplasmic reticulum stressGO:0045454|cell redox homeostasis	GO:0003756|protein disulfide isomerase activity	GO:0005783|endoplasmic reticulum;GO:0016021|integral component of membrane;GO:0009505|plant-type cell wall;GO:0009506|plasmodesma;GO:0005774|vacuolar membrane	K09580|PDIA1, P4HB; protein disulfide-isomerase A1 [EC:5.3.4.1]	map04141|Protein processing in endoplasmic reticulum
f4p60_1425_25759	gi|566187640|ref|XM_002313734.2|	2385	E:0	Populus trichocarpa cysteine proteinase A494 precursor (POPTR_0009s12420g) mRNA, complete cds	gi|118481169|gb|ABK92536.1|	727	E:0	unknown [Populus trichocarpa]	RD19A_ARATH	570	E:0	RecName: Full=Cysteine protease RD19A {ECO:0000305};^Eukaryota; Viridiplantae; Streptophyta; Embryophyta; Tracheophyta; Spermatophyta; Magnoliophyta; eudicotyledons; Gunneridae; Pentapetalae; rosids; malvids; Brassicales; Brassicaceae; Camelineae; Arabidopsis	RD19A_ARATH	573	E:0	RecName: Full=Cysteine protease RD19A {ECO:0000305};^Eukaryota; Viridiplantae; Streptophyta; Embryophyta; Tracheophyta; Spermatophyta; Magnoliophyta; eudicotyledons; Gunneridae; Pentapetalae; rosids; malvids; Brassicales; Brassicaceae; Camelineae; Arabidopsis	PF08246.11	Inhibitor_I29	Cathepsin propeptide inhibitor domain (I29)	COG4870	cathepsin	.	ExpAA=19.74^PredHel=1^Topology=i9-31o	.	GO:0042742|defense response to bacterium;GO:0051603|proteolysis involved in cellular protein catabolic process;GO:0006970|response to osmotic stress;GO:0009651|response to salt stressGO:0006508|proteolysis	GO:0004197|cysteine-type endopeptidase activityGO:0008234|cysteine-type peptidase activity	GO:0005615|extracellular space;GO:0005764|lysosome;GO:0000323|lytic vacuole;GO:0005634|nucleus;GO:0005773|vacuole	K01373|CTSF; cathepsin F [EC:3.4.22.41]	map04142|Lysosome
f2p16_2673_2336	gi|566215321|ref|XM_002325093.2|	4673	E:0	Populus trichocarpa cyclic nucleotide-gated ion channel 5 family protein (POPTR_0018s11530g) mRNA, complete cds	gi|566215322|ref|XP_002325129.2|	1312	E:0	cyclic nucleotide-gated ion channel 5 family protein [Populus trichocarpa]	CNGC5_ARATH	1045	E:0	RecName: Full=Probable cyclic nucleotide-gated ion channel 5;^Eukaryota; Viridiplantae; Streptophyta; Embryophyta; Tracheophyta; Spermatophyta; Magnoliophyta; eudicotyledons; Gunneridae; Pentapetalae; rosids; malvids; Brassicales; Brassicaceae; Camelineae; Arabidopsis	CNGC5_ARATH	1157	E:0	RecName: Full=Probable cyclic nucleotide-gated ion channel 5;^Eukaryota; Viridiplantae; Streptophyta; Embryophyta; Tracheophyta; Spermatophyta; Magnoliophyta; eudicotyledons; Gunneridae; Pentapetalae; rosids; malvids; Brassicales; Brassicaceae; Camelineae; Arabidopsis	PF00520.30	Ion_trans	Ion transport protein	ENOG410XPSE	Potassium voltage-gated channel, subfamily H (Eag-related), member	.	ExpAA=108.50^PredHel=5^Topology=i114-136o202-224i237-256o276-298i400-422o	.	GO:0042391|regulation of membrane potentialGO:0006811|ion transport;GO:0055085|transmembrane transport	GO:0005262|calcium channel activity;GO:0005516|calmodulin binding;GO:0030552|cAMP binding;GO:0030553|cGMP binding;GO:0005223|intracellular cGMP activated cation channel activity;GO:0005249|voltage-gated potassium channel activityGO:0005216|ion channel activity;GO:0005515|protein binding	GO:0005887|integral component of plasma membrane;GO:0016020|membrane;GO:0005886|plasma membraneGO:0016020|membrane	K05391|CNGF; cyclic nucleotide gated channel, other eukaryote	map04626|Plant-pathogen interaction
f2p40_999_11112	gi|566208388|ref|XM_006373621.1|	1694	E:0	Populus trichocarpa hypothetical protein (POPTR_0016s03000g) mRNA, complete cds	gi|566208389|ref|XP_006373683.1|	382	E:2e-130	hypothetical protein POPTR_0016s03000g [Populus trichocarpa]	SYP52_ARATH	241	E:2e-76	RecName: Full=Syntaxin-52;^Eukaryota; Viridiplantae; Streptophyta; Embryophyta; Tracheophyta; Spermatophyta; Magnoliophyta; eudicotyledons; Gunneridae; Pentapetalae; rosids; malvids; Brassicales; Brassicaceae; Camelineae; Arabidopsis	SYP52_ARATH	284	E:5e-95	RecName: Full=Syntaxin-52;^Eukaryota; Viridiplantae; Streptophyta; Embryophyta; Tracheophyta; Spermatophyta; Magnoliophyta; eudicotyledons; Gunneridae; Pentapetalae; rosids; malvids; Brassicales; Brassicaceae; Camelineae; Arabidopsis	PF05739.18	SNARE	SNARE domain	ENOG410ZZA3	syntaxin	.	ExpAA=22.17^PredHel=1^Topology=i206-228o	.	GO:0006886|intracellular protein transport;GO:0048278|vesicle docking;GO:0006906|vesicle fusion;GO:0016192|vesicle-mediated transport	GO:0005484|SNAP receptor activity;GO:0000149|SNARE binding	GO:0010008|endosome membrane;GO:0005794|Golgi apparatus;GO:0016021|integral component of membrane;GO:0031902|late endosome membrane;GO:0031201|SNARE complex;GO:0005773|vacuole	K08503|SYP5; syntaxin of plants SYP5	map04130|SNARE interactions in vesicular transport
f2p60_1278_8704	gi|566188349|ref|XM_002313554.2|	1965	E:0	Populus trichocarpa cytochrome c1 family protein (POPTR_0009s16660g) mRNA, complete cds	gi|566167795|ref|XP_006384824.1|	575	E:0	hypothetical protein POPTR_0004s21400g [Populus trichocarpa]	CY11_SOLTU	498	E:2e-174	RecName: Full=Cytochrome c1-1, heme protein, mitochondrial;^Eukaryota; Viridiplantae; Streptophyta; Embryophyta; Tracheophyta; Spermatophyta; Magnoliophyta; eudicotyledons; Gunneridae; Pentapetalae; asterids; lamiids; Solanales; Solanaceae; Solanoideae; Solaneae; Solanum	CY11_SOLTU	529	E:0	RecName: Full=Cytochrome c1-1, heme protein, mitochondrial;^Eukaryota; Viridiplantae; Streptophyta; Embryophyta; Tracheophyta; Spermatophyta; Magnoliophyta; eudicotyledons; Gunneridae; Pentapetalae; asterids; lamiids; Solanales; Solanaceae; Solanoideae; Solaneae; Solanum	PF02167.14	Cytochrom_C1	Cytochrome C1 family	COG2857	cytochrome c1	.	ExpAA=65.17^PredHel=4^Topology=o4-18i31-53o73-95i300-319o	.	GO:0055114|oxidation-reduction process	GO:0009055|electron carrier activity;GO:0020037|heme binding;GO:0046872|metal ion bindingGO:0009055|electron carrier activity;GO:0020037|heme binding	GO:0016021|integral component of membrane;GO:0005743|mitochondrial inner membrane;GO:0070469|respiratory chain	K00413|CYC1, CYT1, petC; ubiquinol-cytochrome c reductase cytochrome c1 subunit	map00190|Oxidative phosphorylation;map04260|Cardiac muscle contraction;map05012|Parkinson's disease;map02020|Two-component system;map05016|Huntington's disease;map05010|Alzheimer's disease;map01100|Metabolic pathways;map04932|Non-alcoholic fatty liver disease (NAFLD)
f2p60_984_11332	gi|743941641|ref|XM_011017010.1|	1319	E:0	PREDICTED: Populus euphratica photosystem I reaction center subunit XI, chloroplastic-like (LOC105118949), mRNA	gi|566159703|ref|XP_002303024.2|	387	E:1e-132	Photosystem I reaction center subunit XI family protein, partial [Populus trichocarpa]	PSAL_ARATH	288	E:3e-95	RecName: Full=Photosystem I reaction center subunit XI, chloroplastic;^Eukaryota; Viridiplantae; Streptophyta; Embryophyta; Tracheophyta; Spermatophyta; Magnoliophyta; eudicotyledons; Gunneridae; Pentapetalae; rosids; malvids; Brassicales; Brassicaceae; Camelineae; Arabidopsis	PSAL_ARATH	303	E:9e-103	RecName: Full=Photosystem I reaction center subunit XI, chloroplastic;^Eukaryota; Viridiplantae; Streptophyta; Embryophyta; Tracheophyta; Spermatophyta; Magnoliophyta; eudicotyledons; Gunneridae; Pentapetalae; rosids; malvids; Brassicales; Brassicaceae; Camelineae; Arabidopsis	PF02605.14	PsaL	Photosystem I reaction centre subunit XI	ENOG4111KFU	photosystem I reaction center	.	ExpAA=51.62^PredHel=2^Topology=i131-153o189-211i	.	GO:0015979|photosynthesisGO:0015979|photosynthesis	GO:0019904|protein domain specific binding	GO:0009507|chloroplast;GO:0009941|chloroplast envelope;GO:0031969|chloroplast membrane;GO:0009534|chloroplast thylakoid;GO:0009535|chloroplast thylakoid membrane;GO:0016021|integral component of membrane;GO:0016020|membrane;GO:0009538|photosystem I reaction center;GO:0010287|plastoglobule;GO:0009579|thylakoidGO:0009522|photosystem I;GO:0009538|photosystem I reaction center	K02699|psaL; photosystem I subunit XI	map01100|Metabolic pathways;map00195|Photosynthesis
f2p60_1226_9147	gi|566209288|ref|XM_002323391.2|	2113	E:0	Populus trichocarpa hypothetical protein (POPTR_0016s08050g) mRNA, complete cds	gi|566209289|ref|XP_002323427.2|	577	E:0	hypothetical protein POPTR_0016s08050g [Populus trichocarpa]	ATCA1_ARATH	276	E:1e-88	RecName: Full=Alpha carbonic anhydrase 1, chloroplastic;^Eukaryota; Viridiplantae; Streptophyta; Embryophyta; Tracheophyta; Spermatophyta; Magnoliophyta; eudicotyledons; Gunneridae; Pentapetalae; rosids; malvids; Brassicales; Brassicaceae; Camelineae; Arabidopsis	ATCA1_ARATH	277	E:1e-90	RecName: Full=Alpha carbonic anhydrase 1, chloroplastic;^Eukaryota; Viridiplantae; Streptophyta; Embryophyta; Tracheophyta; Spermatophyta; Magnoliophyta; eudicotyledons; Gunneridae; Pentapetalae; rosids; malvids; Brassicales; Brassicaceae; Camelineae; Arabidopsis	PF00194.20	Carb_anhydrase	Eukaryotic-type carbonic anhydrase	COG3338	Carbonic anhydrase	.	ExpAA=20.13^PredHel=1^Topology=i12-31o	.	GO:0006730|one-carbon metabolic process	GO:0004089|carbonate dehydratase activity;GO:0008270|zinc ion binding	GO:0009570|chloroplast stroma;GO:0005783|endoplasmic reticulum	K01674|cah; carbonic anhydrase [EC:4.2.1.1]	map00910|Nitrogen metabolism
f3p60_1012_11054	gi|566178276|ref|XM_002308603.2|	1555	E:0	Populus trichocarpa vacuolar ATP synthase family protein (POPTR_0006s26480g) mRNA, complete cds	gi|224089112|ref|XP_002308639.1|	312	E:1e-103	vacuolar ATP synthase family protein [Populus trichocarpa]	VATO1_ARATH	282	E:2e-93	RecName: Full=V-type proton ATPase subunit c''1;^Eukaryota; Viridiplantae; Streptophyta; Embryophyta; Tracheophyta; Spermatophyta; Magnoliophyta; eudicotyledons; Gunneridae; Pentapetalae; rosids; malvids; Brassicales; Brassicaceae; Camelineae; Arabidopsis	VATO1_ARATH	306	E:7e-105	RecName: Full=V-type proton ATPase subunit c''1;^Eukaryota; Viridiplantae; Streptophyta; Embryophyta; Tracheophyta; Spermatophyta; Magnoliophyta; eudicotyledons; Gunneridae; Pentapetalae; rosids; malvids; Brassicales; Brassicaceae; Camelineae; Arabidopsis	PF00137.20	ATP-synt_C	ATP synthase subunit C	COG0636	F(1)F(0) ATP synthase produces ATP from ADP in the presence of a proton or sodium gradient. F-type ATPases consist of two structural domains, F(1) containing the extramembraneous catalytic core and F(0) containing the membrane proton channel, linked together by a central stalk and a peripheral stalk. During catalysis, ATP synthesis in the catalytic domain of F(1) is coupled via a rotary mechanism…	.	ExpAA=94.12^PredHel=4^Topology=o38-60i80-102o122-144i164-186o	.	GO:0015991|ATP hydrolysis coupled proton transport;GO:0007035|vacuolar acidificationGO:0015991|ATP hydrolysis coupled proton transport	GO:0046961|proton-transporting ATPase activity, rotational mechanismGO:0015078|hydrogen ion transmembrane transporter activity	GO:0005789|endoplasmic reticulum membrane;GO:0000139|Golgi membrane;GO:0016021|integral component of membrane;GO:0000220|vacuolar proton-transporting V-type ATPase, V0 domainGO:0033177|proton-transporting two-sector ATPase complex, proton-transporting domain	K03661|ATPeV0B, ATP6F; V-type H+-transporting ATPase 21kDa proteolipid subunit	map05110|Vibrio cholerae infection;map04142|Lysosome;map04145|Phagosome;map05120|Epithelial cell signaling in Helicobacter pylori infection;map05152|Tuberculosis;map04721|Synaptic vesicle cycle;map05323|Rheumatoid arthritis;map01100|Metabolic pathways;map00190|Oxidative phosphorylation
f2p60_2572_2572	gi|743884703|ref|XM_011039043.1|	4248	E:0	PREDICTED: Populus euphratica mannan endo-1,4-beta-mannosidase 2-like (LOC105134584), mRNA	gi|118488294|gb|ABK95966.1|	874	E:0	unknown [Populus trichocarpa]	MAN2_ARATH	661	E:0	RecName: Full=Mannan endo-1,4-beta-mannosidase 2;^Eukaryota; Viridiplantae; Streptophyta; Embryophyta; Tracheophyta; Spermatophyta; Magnoliophyta; eudicotyledons; Gunneridae; Pentapetalae; rosids; malvids; Brassicales; Brassicaceae; Camelineae; Arabidopsis	MAN2_ARATH	691	E:0	RecName: Full=Mannan endo-1,4-beta-mannosidase 2;^Eukaryota; Viridiplantae; Streptophyta; Embryophyta; Tracheophyta; Spermatophyta; Magnoliophyta; eudicotyledons; Gunneridae; Pentapetalae; rosids; malvids; Brassicales; Brassicaceae; Camelineae; Arabidopsis	PF00150.17	Cellulase	Cellulase (glycosyl hydrolase family 5)	COG3934	Mannan endo-1,4-beta-mannosidase	.	ExpAA=22.66^PredHel=1^Topology=i7-29o	.	GO:0046355|mannan catabolic process;GO:0010412|mannan metabolic processGO:0005975|carbohydrate metabolic process	GO:0016985|mannan endo-1,4-beta-mannosidase activityGO:0004553|hydrolase activity, hydrolyzing O-glycosyl compounds	GO:0005576|extracellular region	K19355|MAN; mannan endo-1,4-beta-mannosidase [EC:3.2.1.78]	map00051|Fructose and mannose metabolism
f5p60_786_32666	gi|566195979|ref|XM_006377944.1|	1144	E:0	Populus trichocarpa Photosystem I reaction center subunit V family protein (POPTR_0011s17170g) mRNA, complete cds	gi|566195980|ref|XP_006378006.1|	328	E:2e-111	Photosystem I reaction center subunit V family protein [Populus trichocarpa]	PSAG_ARATH	204	E:3e-64	RecName: Full=Photosystem I reaction center subunit V, chloroplastic;^Eukaryota; Viridiplantae; Streptophyta; Embryophyta; Tracheophyta; Spermatophyta; Magnoliophyta; eudicotyledons; Gunneridae; Pentapetalae; rosids; malvids; Brassicales; Brassicaceae; Camelineae; Arabidopsis	PSAG_ARATH	204	E:1e-65	RecName: Full=Photosystem I reaction center subunit V, chloroplastic;^Eukaryota; Viridiplantae; Streptophyta; Embryophyta; Tracheophyta; Spermatophyta; Magnoliophyta; eudicotyledons; Gunneridae; Pentapetalae; rosids; malvids; Brassicales; Brassicaceae; Camelineae; Arabidopsis	PF01241.17	PSI_PSAK	Photosystem I psaG / psaK	ENOG41120CZ	photosystem I reaction center subunit V	.	ExpAA=40.72^PredHel=2^Topology=o58-80i120-142o	.	GO:0015979|photosynthesis;GO:0009773|photosynthetic electron transport in photosystem I;GO:0009780|photosynthetic NADP+ reduction;GO:0042550|photosystem I stabilization;GO:0050821|protein stabilizationGO:0015979|photosynthesis	GO:0016168|chlorophyll binding	GO:0009507|chloroplast;GO:0009941|chloroplast envelope;GO:0031969|chloroplast membrane;GO:0030093|chloroplast photosystem I;GO:0009534|chloroplast thylakoid;GO:0009535|chloroplast thylakoid membrane;GO:0016021|integral component of membrane;GO:0009579|thylakoidGO:0009522|photosystem I;GO:0016020|membrane	K08905|psaG; photosystem I subunit V	map01100|Metabolic pathways;map00195|Photosynthesis
f5p60_795_32485	gi|566186249|ref|XM_002313375.2|	1332	E:0	Populus trichocarpa Copper transporter 1 family protein (POPTR_0009s04370g) mRNA, complete cds	gi|224104361|ref|XP_002313411.1|	256	E:3e-83	Copper transporter 1 family protein [Populus trichocarpa]	COPT1_ARATH	150	E:4e-43	RecName: Full=Copper transporter 1;^Eukaryota; Viridiplantae; Streptophyta; Embryophyta; Tracheophyta; Spermatophyta; Magnoliophyta; eudicotyledons; Gunneridae; Pentapetalae; rosids; malvids; Brassicales; Brassicaceae; Camelineae; Arabidopsis	COPT1_ARATH	151	E:1e-44	RecName: Full=Copper transporter 1;^Eukaryota; Viridiplantae; Streptophyta; Embryophyta; Tracheophyta; Spermatophyta; Magnoliophyta; eudicotyledons; Gunneridae; Pentapetalae; rosids; malvids; Brassicales; Brassicaceae; Camelineae; Arabidopsis	PF04145.14	Ctr	Ctr copper transporter family	ENOG4111I8D	Solute carrier family 31 copper transporters member	.	ExpAA=59.15^PredHel=2^Topology=i90-107o144-166i	.	GO:0006825|copper ion transport;GO:0048235|pollen sperm cell differentiation;GO:0048364|root developmentGO:0035434|copper ion transmembrane transport	GO:0005375|copper ion transmembrane transporter activityGO:0005375|copper ion transmembrane transporter activity	GO:0016021|integral component of membrane;GO:0016020|membraneGO:0016021|integral component of membrane	K14686|SLC31A1, CTR1; solute carrier family 31 (copper transporter), member 1	map04978|Mineral absorption
f2p10_4522_197	gi|743937865|ref|XM_011015047.1|	7817	E:0	PREDICTED: Populus euphratica ABC transporter B family member 1-like (LOC105117396), transcript variant X1, mRNA	gi|566209510|ref|XP_002323485.2|	1422	E:0	P glycoprotein1 [Populus trichocarpa]	AB1B_ARATH	1275	E:0	RecName: Full=ABC transporter B family member 1;^Eukaryota; Viridiplantae; Streptophyta; Embryophyta; Tracheophyta; Spermatophyta; Magnoliophyta; eudicotyledons; Gunneridae; Pentapetalae; rosids; malvids; Brassicales; Brassicaceae; Camelineae; Arabidopsis	AB1B_ARATH	591	E:0	RecName: Full=ABC transporter B family member 1;^Eukaryota; Viridiplantae; Streptophyta; Embryophyta; Tracheophyta; Spermatophyta; Magnoliophyta; eudicotyledons; Gunneridae; Pentapetalae; rosids; malvids; Brassicales; Brassicaceae; Camelineae; Arabidopsis	PF00664.22	ABC_membrane	ABC transporter transmembrane region	COG1132	(ABC) transporter	.	ExpAA=127.38^PredHel=6^Topology=o117-139i160-179o243-262i264-286o349-371i378-400o	.	GO:0043481|anthocyanin accumulation in tissues in response to UV light;GO:0010315|auxin efflux;GO:0009926|auxin polar transport;GO:0009734|auxin-activated signaling pathway;GO:0009640|photomorphogenesis;GO:0009958|positive gravitropism;GO:0008361|regulation of cell size;GO:0009733|response to auxin;GO:0009637|response to blue light;GO:0009624|response to nematode;GO:0009639|response to red or far…	GO:0005524|ATP binding;GO:0042626|ATPase activity, coupled to transmembrane movement of substances;GO:0010329|auxin efflux transmembrane transporter activity;GO:0010328|auxin influx transmembrane transporter activityGO:0005524|ATP binding;GO:0042626|ATPase activity, coupled to transmembrane movement of substances	GO:0016021|integral component of membrane;GO:0005886|plasma membrane;GO:0009506|plasmodesmaGO:0016021|integral component of membrane	K05658|ABCB1; ATP-binding cassette, subfamily B (MDR/TAP), member 1 [EC:3.6.3.44];K05658|ABCB1; ATP-binding cassette, subfamily B (MDR/TAP), member 1 [EC:3.6.3.44]	map02010|ABC transporters;map05206|MicroRNAs in cancer;map04976|Bile secretion;map02010|ABC transporters;map05206|MicroRNAs in cancer;map04976|Bile secretion
f2p10_4522_197	gi|743937865|ref|XM_011015047.1|	7817	E:0	PREDICTED: Populus euphratica ABC transporter B family member 1-like (LOC105117396), transcript variant X1, mRNA	gi|566209510|ref|XP_002323485.2|	1422	E:0	P glycoprotein1 [Populus trichocarpa]	AB1B_ARATH	1275	E:0	RecName: Full=ABC transporter B family member 1;^Eukaryota; Viridiplantae; Streptophyta; Embryophyta; Tracheophyta; Spermatophyta; Magnoliophyta; eudicotyledons; Gunneridae; Pentapetalae; rosids; malvids; Brassicales; Brassicaceae; Camelineae; Arabidopsis	AB1B_ARATH	591	E:0	RecName: Full=ABC transporter B family member 1;^Eukaryota; Viridiplantae; Streptophyta; Embryophyta; Tracheophyta; Spermatophyta; Magnoliophyta; eudicotyledons; Gunneridae; Pentapetalae; rosids; malvids; Brassicales; Brassicaceae; Camelineae; Arabidopsis	PF00664.22	ABC_membrane	ABC transporter transmembrane region	COG1132	(ABC) transporter	.	ExpAA=127.76^PredHel=6^Topology=o176-209i222-244o300-322i324-346o409-431i444-466o	.	GO:0043481|anthocyanin accumulation in tissues in response to UV light;GO:0010315|auxin efflux;GO:0009926|auxin polar transport;GO:0009734|auxin-activated signaling pathway;GO:0009640|photomorphogenesis;GO:0009958|positive gravitropism;GO:0008361|regulation of cell size;GO:0009733|response to auxin;GO:0009637|response to blue light;GO:0009624|response to nematode;GO:0009639|response to red or far…	GO:0005524|ATP binding;GO:0042626|ATPase activity, coupled to transmembrane movement of substances;GO:0010329|auxin efflux transmembrane transporter activity;GO:0010328|auxin influx transmembrane transporter activityGO:0005524|ATP binding;GO:0042626|ATPase activity, coupled to transmembrane movement of substances;GO:0016887|ATPase activity	GO:0016021|integral component of membrane;GO:0005886|plasma membrane;GO:0009506|plasmodesmaGO:0016021|integral component of membrane	K05658|ABCB1; ATP-binding cassette, subfamily B (MDR/TAP), member 1 [EC:3.6.3.44];K05658|ABCB1; ATP-binding cassette, subfamily B (MDR/TAP), member 1 [EC:3.6.3.44]	map02010|ABC transporters;map05206|MicroRNAs in cancer;map04976|Bile secretion;map02010|ABC transporters;map05206|MicroRNAs in cancer;map04976|Bile secretion
f4p60_1414_25900	gi|743836597|ref|XM_011026994.1|	2270	E:0	PREDICTED: Populus euphratica cathepsin B-like (LOC105126206), mRNA	gi|743836598|ref|XP_011025296.1|	673	E:0	PREDICTED: cathepsin B-like [Populus euphratica]	CATB2_ARATH	501	E:2e-174	RecName: Full=Cathepsin B-like protease 2 {ECO:0000305};^Eukaryota; Viridiplantae; Streptophyta; Embryophyta; Tracheophyta; Spermatophyta; Magnoliophyta; eudicotyledons; Gunneridae; Pentapetalae; rosids; malvids; Brassicales; Brassicaceae; Camelineae; Arabidopsis	CATB3_ARATH	536	E:0	RecName: Full=Cathepsin B-like protease 3 {ECO:0000305};^Eukaryota; Viridiplantae; Streptophyta; Embryophyta; Tracheophyta; Spermatophyta; Magnoliophyta; eudicotyledons; Gunneridae; Pentapetalae; rosids; malvids; Brassicales; Brassicaceae; Camelineae; Arabidopsis	PF08127.12	Propeptide_C1	Peptidase family C1 propeptide	COG4870	cathepsin	.	ExpAA=24.40^PredHel=1^Topology=i33-55o	.	GO:0006952|defense response;GO:0051603|proteolysis involved in cellular protein catabolic process;GO:0050790|regulation of catalytic activityGO:0050790|regulation of catalytic activity;GO:0006508|proteolysis	GO:0004197|cysteine-type endopeptidase activityGO:0004197|cysteine-type endopeptidase activity;GO:0008234|cysteine-type peptidase activity	GO:0005829|cytosol;GO:0005615|extracellular space;GO:0005764|lysosome;GO:0005773|vacuole	K01363|CTSB; cathepsin B [EC:3.4.22.1]	map04924|Renin secretion;map04142|Lysosome;map04612|Antigen processing and presentation
f2p49_3265_1239	gi|743906309|ref|XM_011048264.1|	5301	E:0	PREDICTED: Populus euphratica pyrophosphate-energized membrane proton pump 2 (LOC105141142), transcript variant X1, mRNA	gi|743906310|ref|XP_011046566.1|	1403	E:0	PREDICTED: pyrophosphate-energized membrane proton pump 2 [Populus euphratica]	AVPX_ARATH	1267	E:0	RecName: Full=Pyrophosphate-energized membrane proton pump 3;^Eukaryota; Viridiplantae; Streptophyta; Embryophyta; Tracheophyta; Spermatophyta; Magnoliophyta; eudicotyledons; Gunneridae; Pentapetalae; rosids; malvids; Brassicales; Brassicaceae; Camelineae; Arabidopsis	AVPX_ARATH	1450	E:0	RecName: Full=Pyrophosphate-energized membrane proton pump 3;^Eukaryota; Viridiplantae; Streptophyta; Embryophyta; Tracheophyta; Spermatophyta; Magnoliophyta; eudicotyledons; Gunneridae; Pentapetalae; rosids; malvids; Brassicales; Brassicaceae; Camelineae; Arabidopsis	PF03030.15	H_PPase	Inorganic H+ pyrophosphatase	COG3808	pump that utilizes the energy of pyrophosphate hydrolysis as the driving force for	.	ExpAA=352.01^PredHel=14^Topology=i45-62o66-85i125-142o157-179i212-234o249-271i392-414o419-441i474-496o511-533i576-595o610-632i685-707o717-739i	.	GO:0015992|proton transportGO:0015992|proton transport	GO:0009678|hydrogen-translocating pyrophosphatase activity;GO:0004427|inorganic diphosphatase activity;GO:0046872|metal ion bindingGO:0004427|inorganic diphosphatase activity;GO:0009678|hydrogen-translocating pyrophosphatase activity	GO:0000139|Golgi membrane;GO:0016021|integral component of membraneGO:0016020|membrane	K01507|ppa; inorganic pyrophosphatase [EC:3.6.1.1]	map00190|Oxidative phosphorylation
f5p60_1989_22046	gi|224092040|ref|XM_002309415.1|	3526	E:0	Populus trichocarpa beta-ketoacyl-CoA synthase family protein (POPTR_0006s23460g) mRNA, complete cds	gi|224092041|ref|XP_002309451.1|	1076	E:0	beta-ketoacyl-CoA synthase family protein [Populus trichocarpa]	KCS10_ARATH	897	E:0	RecName: Full=3-ketoacyl-CoA synthase 10 {ECO:0000303|PubMed:18465198};^Eukaryota; Viridiplantae; Streptophyta; Embryophyta; Tracheophyta; Spermatophyta; Magnoliophyta; eudicotyledons; Gunneridae; Pentapetalae; rosids; malvids; Brassicales; Brassicaceae; Camelineae; Arabidopsis	KCS10_ARATH	902	E:0	RecName: Full=3-ketoacyl-CoA synthase 10 {ECO:0000303|PubMed:18465198};^Eukaryota; Viridiplantae; Streptophyta; Embryophyta; Tracheophyta; Spermatophyta; Magnoliophyta; eudicotyledons; Gunneridae; Pentapetalae; rosids; malvids; Brassicales; Brassicaceae; Camelineae; Arabidopsis	PF08392.11	FAE1_CUT1_RppA	FAE1/Type III polyketide synthase-like protein	ENOG410YCWN	3-ketoacyl-coa synthase	.	ExpAA=70.58^PredHel=3^Topology=i68-90o110-129i259-281o	.	GO:0006633|fatty acid biosynthetic process;GO:0009409|response to cold;GO:0080167|response to karrikin;GO:0009416|response to light stimulusGO:0006633|fatty acid biosynthetic process	GO:0102336|3-oxo-arachidoyl-CoA synthase activity;GO:0102337|3-oxo-cerotoyl-CoA synthase activity;GO:0102338|3-oxo-lignoceronyl-CoA synthase activityGO:0016747|transferase activity, transferring acyl groups other than amino-acyl groups	GO:0005783|endoplasmic reticulum;GO:0005789|endoplasmic reticulum membrane;GO:0016021|integral component of membrane;GO:0016020|membraneGO:0016020|membrane	K15397|KCS; 3-ketoacyl-CoA synthase [EC:2.3.1.199]	map00062|Fatty acid elongation;map01110|Biosynthesis of secondary metabolites
f2p29_4856_17841	gi|743818946|ref|XM_011022461.1|	7886	E:0	PREDICTED: Populus euphratica histidine kinase 3-like (LOC105123021), transcript variant X1, mRNA	gi|566163104|ref|XP_006385901.1|	2096	E:0	hypothetical protein POPTR_0003s16950g [Populus trichocarpa]	AHK3_ARATH	1418	E:0	RecName: Full=Histidine kinase 3;^Eukaryota; Viridiplantae; Streptophyta; Embryophyta; Tracheophyta; Spermatophyta; Magnoliophyta; eudicotyledons; Gunneridae; Pentapetalae; rosids; malvids; Brassicales; Brassicaceae; Camelineae; Arabidopsis	AHK3_ARATH	1397	E:0	RecName: Full=Histidine kinase 3;^Eukaryota; Viridiplantae; Streptophyta; Embryophyta; Tracheophyta; Spermatophyta; Magnoliophyta; eudicotyledons; Gunneridae; Pentapetalae; rosids; malvids; Brassicales; Brassicaceae; Camelineae; Arabidopsis	PF03924.12	CHASE	CHASE domain	COG0642	Histidine kinase	.	ExpAA=58.25^PredHel=3^Topology=i2-21o70-88i373-395o	.	GO:0071215|cellular response to abscisic acid stimulus;GO:0070417|cellular response to cold;GO:0016036|cellular response to phosphate starvation;GO:0071329|cellular response to sucrose stimulus;GO:0009736|cytokinin-activated signaling pathway;GO:0042742|defense response to bacterium;GO:0010150|leaf senescence;GO:0034757|negative regulation of iron ion transport;GO:0009116|nucleoside metabolic pro…	GO:0009884|cytokinin receptor activity;GO:0000155|phosphorelay sensor kinase activity;GO:0004673|protein histidine kinase activity;GO:0043424|protein histidine kinase bindingGO:0000155|phosphorelay sensor kinase activity	GO:0005789|endoplasmic reticulum membrane;GO:0016021|integral component of membrane;GO:0005886|plasma membrane	K14489|AHK2_3_4; arabidopsis histidine kinase 2/3/4 (cytokinin receptor) [EC:2.7.13.3]	map04075|Plant hormone signal transduction
f4p60_892_12058	gi|118483901|gb|EF145704.1|	1522	E:0	Populus trichocarpa clone WS0112_M13 unknown mRNA	gi|566171124|ref|XP_006383247.1|	335	E:9e-111	hypothetical protein POPTR_0005s12850g [Populus trichocarpa]	OST48_ARATH	296	E:1e-95	RecName: Full=Dolichyl-diphosphooligosaccharide--protein glycosyltransferase 48 kDa subunit;^Eukaryota; Viridiplantae; Streptophyta; Embryophyta; Tracheophyta; Spermatophyta; Magnoliophyta; eudicotyledons; Gunneridae; Pentapetalae; rosids; malvids; Brassicales; Brassicaceae; Camelineae; Arabidopsis	OST48_ARATH	296	E:6e-98	RecName: Full=Dolichyl-diphosphooligosaccharide--protein glycosyltransferase 48 kDa subunit;^Eukaryota; Viridiplantae; Streptophyta; Embryophyta; Tracheophyta; Spermatophyta; Magnoliophyta; eudicotyledons; Gunneridae; Pentapetalae; rosids; malvids; Brassicales; Brassicaceae; Camelineae; Arabidopsis	PF03345.13	DDOST_48kD	Oligosaccharyltransferase 48 kDa subunit beta	ENOG410XSF3	Dolichyl-diphosphooligosaccharide--protein glycosyltransferase	.	ExpAA=22.58^PredHel=1^Topology=o133-155i	.	GO:0009664|plant-type cell wall organization;GO:0018279|protein N-linked glycosylation via asparagine;GO:0009826|unidimensional cell growthGO:0018279|protein N-linked glycosylation via asparagine	GO:0016757|transferase activity, transferring glycosyl groups	GO:0005783|endoplasmic reticulum;GO:0005794|Golgi apparatus;GO:0016021|integral component of membrane;GO:0016020|membrane;GO:0005730|nucleolus;GO:0008250|oligosaccharyltransferase complex;GO:0009505|plant-type cell wall;GO:0009506|plasmodesma;GO:0005774|vacuolar membrane;GO:0005773|vacuoleGO:0005789|endoplasmic reticulum membrane	K12670|WBP1; oligosaccharyltransferase complex subunit beta	map04141|Protein processing in endoplasmic reticulum;map00513|Various types of N-glycan biosynthesis;map01100|Metabolic pathways;map00510|N-Glycan biosynthesis
f2p60_1542_24853	gi|118486260|gb|EF146932.1|	2379	E:0	Populus trichocarpa clone WS01225_B12 unknown mRNA	gi|118486261|gb|ABK94972.1|	681	E:0	unknown [Populus trichocarpa]	PXN_ARATH	388	E:5e-130	RecName: Full=Peroxisomal nicotinamide adenine dinucleotide carrier;^Eukaryota; Viridiplantae; Streptophyta; Embryophyta; Tracheophyta; Spermatophyta; Magnoliophyta; eudicotyledons; Gunneridae; Pentapetalae; rosids; malvids; Brassicales; Brassicaceae; Camelineae; Arabidopsis	PXN_ARATH	395	E:2e-134	RecName: Full=Peroxisomal nicotinamide adenine dinucleotide carrier;^Eukaryota; Viridiplantae; Streptophyta; Embryophyta; Tracheophyta; Spermatophyta; Magnoliophyta; eudicotyledons; Gunneridae; Pentapetalae; rosids; malvids; Brassicales; Brassicaceae; Camelineae; Arabidopsis	PF00153.26	Mito_carr	Mitochondrial carrier protein	ENOG410ZNC0	peroxisomal membrane protein	.	ExpAA=86.27^PredHel=4^Topology=i27-46o147-169i236-258o282-304i	.	GO:0006839|mitochondrial transport;GO:0043132|NAD transport;GO:0015858|nucleoside transport;GO:0044375|regulation of peroxisome size	GO:0015217|ADP transmembrane transporter activity;GO:0080122|AMP transmembrane transporter activity;GO:0015297|antiporter activity;GO:0005347|ATP transmembrane transporter activity;GO:0015228|coenzyme A transmembrane transporter activity;GO:0015230|FAD transmembrane transporter activity;GO:0044610|FMN transmembrane transporter activity;GO:0051724|NAD transporter activity	GO:0046861|glyoxysomal membrane;GO:0005779|integral component of peroxisomal membrane;GO:0005743|mitochondrial inner membrane;GO:0005777|peroxisome;GO:0005774|vacuolar membrane	K13354|SLC25A17, PMP34; solute carrier family 25 (peroxisomal adenine nucleotide transporter), member 17	map04146|Peroxisome
f4p60_1400_7905	gi|118484854|gb|EF146204.1|	2501	E:0	Populus trichocarpa clone WS0116_D20 unknown mRNA	gi|224062782|ref|XP_002300888.1|	298	E:7e-110	acid phosphatase family protein [Populus trichocarpa]	SBH1_ARATH	223	E:1e-79	RecName: Full=Sphinganine C4-monooxygenase 1;^Eukaryota; Viridiplantae; Streptophyta; Embryophyta; Tracheophyta; Spermatophyta; Magnoliophyta; eudicotyledons; Gunneridae; Pentapetalae; rosids; malvids; Brassicales; Brassicaceae; Camelineae; Arabidopsis	SBH2_ARATH	279	E:4e-93	RecName: Full=Sphinganine C4-monooxygenase 2;^Eukaryota; Viridiplantae; Streptophyta; Embryophyta; Tracheophyta; Spermatophyta; Magnoliophyta; eudicotyledons; Gunneridae; Pentapetalae; rosids; malvids; Brassicales; Brassicaceae; Camelineae; Arabidopsis	PF04116.12	FA_hydroxylase	Fatty acid hydroxylase superfamily	COG3000	fatty acid hydroxylase	.	ExpAA=71.31^PredHel=1^Topology=i12-34o	.	GO:0009640|photomorphogenesis;GO:0046520|sphingoid biosynthetic processGO:0008610|lipid biosynthetic process;GO:0055114|oxidation-reduction process	GO:0005506|iron ion binding;GO:0042284|sphingolipid delta-4 desaturase activityGO:0005506|iron ion binding;GO:0016491|oxidoreductase activity	GO:0005783|endoplasmic reticulum;GO:0005789|endoplasmic reticulum membrane;GO:0005794|Golgi apparatus;GO:0016021|integral component of membrane	K04713|SUR2; sphinganine C4-monooxygenase [EC:1.14.18.5]	map01100|Metabolic pathways;map00600|Sphingolipid metabolism
f2p60_1650_24144	gi|566204498|ref|XM_002320458.2|	2878	E:0	Populus trichocarpa thioredoxin family protein (POPTR_0014s15820g) mRNA, complete cds	gi|566204499|ref|XP_002320494.2|	766	E:0	thioredoxin family protein [Populus trichocarpa]	PDI22_ARATH	619	E:0	RecName: Full=Protein disulfide-isomerase like 2-2;^Eukaryota; Viridiplantae; Streptophyta; Embryophyta; Tracheophyta; Spermatophyta; Magnoliophyta; eudicotyledons; Gunneridae; Pentapetalae; rosids; malvids; Brassicales; Brassicaceae; Camelineae; Arabidopsis	PDI23_ORYSJ	699	E:0	RecName: Full=Protein disulfide isomerase-like 2-3;^Eukaryota; Viridiplantae; Streptophyta; Embryophyta; Tracheophyta; Spermatophyta; Magnoliophyta; Liliopsida; Poales; Poaceae; BOP clade; Oryzoideae; Oryzeae; Oryzinae; Oryza	PF00085.19	Thioredoxin	Thioredoxin	COG0526	Thioredoxin	.	ExpAA=19.65^PredHel=1^Topology=i7-29o	.	GO:0045454|cell redox homeostasis;GO:0006457|protein folding;GO:0034976|response to endoplasmic reticulum stressGO:0045454|cell redox homeostasis	GO:0003756|protein disulfide isomerase activity	GO:0005788|endoplasmic reticulum lumen	K09584|PDIA6, TXNDC7; protein disulfide-isomerase A6 [EC:5.3.4.1]	map04141|Protein processing in endoplasmic reticulum
f3p60_2830_19587	gi|743883122|ref|XM_011038642.1|	4806	E:0	PREDICTED: Populus euphratica pyrophosphate-energized vacuolar membrane proton pump 1-like (LOC105134291), mRNA	gi|566168857|ref|XP_006382405.1|	1465	E:0	inorganic pyrophosphatase family protein [Populus trichocarpa]	AVP1_ARATH	1252	E:0	RecName: Full=Pyrophosphate-energized vacuolar membrane proton pump 1;^Eukaryota; Viridiplantae; Streptophyta; Embryophyta; Tracheophyta; Spermatophyta; Magnoliophyta; eudicotyledons; Gunneridae; Pentapetalae; rosids; malvids; Brassicales; Brassicaceae; Camelineae; Arabidopsis	AVP1_ARATH	1293	E:0	RecName: Full=Pyrophosphate-energized vacuolar membrane proton pump 1;^Eukaryota; Viridiplantae; Streptophyta; Embryophyta; Tracheophyta; Spermatophyta; Magnoliophyta; eudicotyledons; Gunneridae; Pentapetalae; rosids; malvids; Brassicales; Brassicaceae; Camelineae; Arabidopsis	PF03030.15	H_PPase	Inorganic H+ pyrophosphatase	COG3808	pump that utilizes the energy of pyrophosphate hydrolysis as the driving force for	.	ExpAA=309.59^PredHel=15^Topology=o10-32i86-108o128-150i181-203o218-237i286-308o313-335i356-378o393-412i441-463o468-490i534-556o566-583i650-672o731-753i	.	GO:0009926|auxin polar transport;GO:0010248|establishment or maintenance of transmembrane electrochemical gradient;GO:0048366|leaf development;GO:0015992|proton transport;GO:0009651|response to salt stress;GO:0009414|response to water deprivationGO:0015992|proton transport	GO:0009678|hydrogen-translocating pyrophosphatase activity;GO:0004427|inorganic diphosphatase activity;GO:0046872|metal ion bindingGO:0004427|inorganic diphosphatase activity;GO:0009678|hydrogen-translocating pyrophosphatase activity	GO:0009507|chloroplast;GO:0009941|chloroplast envelope;GO:0010008|endosome membrane;GO:0005794|Golgi apparatus;GO:0016021|integral component of membrane;GO:0016020|membrane;GO:0005739|mitochondrion;GO:0000325|plant-type vacuole;GO:0009705|plant-type vacuole membrane;GO:0005886|plasma membrane;GO:0005774|vacuolar membrane;GO:0005773|vacuoleGO:0016020|membrane	K01507|ppa; inorganic pyrophosphatase [EC:3.6.1.1]	map00190|Oxidative phosphorylation
f2p25_2447_20529	gi|566165532|ref|XM_002305194.2|	2950	E:0	Populus trichocarpa nicastrin-related family protein (POPTR_0004s08120g) mRNA, complete cds	gi|566165533|ref|XP_002305230.2|	1184	E:0	nicastrin-related family protein [Populus trichocarpa]	NICA_ARATH	778	E:0	RecName: Full=Nicastrin;^Eukaryota; Viridiplantae; Streptophyta; Embryophyta; Tracheophyta; Spermatophyta; Magnoliophyta; eudicotyledons; Gunneridae; Pentapetalae; rosids; malvids; Brassicales; Brassicaceae; Camelineae; Arabidopsis	NICA_ARATH	805	E:0	RecName: Full=Nicastrin;^Eukaryota; Viridiplantae; Streptophyta; Embryophyta; Tracheophyta; Spermatophyta; Magnoliophyta; eudicotyledons; Gunneridae; Pentapetalae; rosids; malvids; Brassicales; Brassicaceae; Camelineae; Arabidopsis	PF04389.16	Peptidase_M28	Peptidase family M28	ENOG410XT6X	nicastrin	.	ExpAA=22.46^PredHel=1^Topology=o588-610i	.	GO:0007219|Notch signaling pathway;GO:0016485|protein processingGO:0016485|protein processing	GO:0004175|endopeptidase activity	GO:0005887|integral component of plasma membraneGO:0016021|integral component of membrane	K06171|NCSTN; nicastrin	map04330|Notch signaling pathway;map05010|Alzheimer's disease
f2p13_2492_20406	gi|743902927|ref|XM_011046515.1|	2174	E:0	PREDICTED: Populus euphratica sphinganine C(4)-monooxygenase 1-like (LOC105139883), transcript variant X1, mRNA	gi|743902928|ref|XP_011044817.1|	442	E:2e-146	PREDICTED: sphinganine C(4)-monooxygenase 1-like [Populus euphratica]	SBH1_ARATH	315	E:6e-99	RecName: Full=Sphinganine C4-monooxygenase 1;^Eukaryota; Viridiplantae; Streptophyta; Embryophyta; Tracheophyta; Spermatophyta; Magnoliophyta; eudicotyledons; Gunneridae; Pentapetalae; rosids; malvids; Brassicales; Brassicaceae; Camelineae; Arabidopsis	SBH2_ARATH	353	E:2e-121	RecName: Full=Sphinganine C4-monooxygenase 2;^Eukaryota; Viridiplantae; Streptophyta; Embryophyta; Tracheophyta; Spermatophyta; Magnoliophyta; eudicotyledons; Gunneridae; Pentapetalae; rosids; malvids; Brassicales; Brassicaceae; Camelineae; Arabidopsis	PF04116.12	FA_hydroxylase	Fatty acid hydroxylase superfamily	COG3000	fatty acid hydroxylase	.	ExpAA=88.77^PredHel=4^Topology=i12-34o92-114i135-154o159-181i	.	GO:0009640|photomorphogenesis;GO:0046520|sphingoid biosynthetic processGO:0008610|lipid biosynthetic process;GO:0055114|oxidation-reduction process	GO:0005506|iron ion binding;GO:0042284|sphingolipid delta-4 desaturase activityGO:0005506|iron ion binding;GO:0016491|oxidoreductase activity	GO:0005783|endoplasmic reticulum;GO:0005789|endoplasmic reticulum membrane;GO:0005794|Golgi apparatus;GO:0016021|integral component of membrane	K04713|SUR2; sphinganine C4-monooxygenase [EC:1.14.18.5]	map01100|Metabolic pathways;map00600|Sphingolipid metabolism
f2p60_1224_27635	gi|566191974|ref|XM_002316254.2|	2141	E:0	Populus trichocarpa 3-oxo-5-alpha-steroid 4-dehydrogenase family protein (POPTR_0010s21190g) mRNA, complete cds	gi|224112781|ref|XP_002316290.1|	560	E:0	3-oxo-5-alpha-steroid 4-dehydrogenase family protein [Populus trichocarpa]	TECR_ARATH	478	E:5e-167	RecName: Full=Very-long-chain enoyl-CoA reductase {ECO:0000305};^Eukaryota; Viridiplantae; Streptophyta; Embryophyta; Tracheophyta; Spermatophyta; Magnoliophyta; eudicotyledons; Gunneridae; Pentapetalae; rosids; malvids; Brassicales; Brassicaceae; Camelineae; Arabidopsis	TECR_ARATH	536	E:0	RecName: Full=Very-long-chain enoyl-CoA reductase {ECO:0000305};^Eukaryota; Viridiplantae; Streptophyta; Embryophyta; Tracheophyta; Spermatophyta; Magnoliophyta; eudicotyledons; Gunneridae; Pentapetalae; rosids; malvids; Brassicales; Brassicaceae; Camelineae; Arabidopsis	PF02544.15	Steroid_dh	3-oxo-5-alpha-steroid 4-dehydrogenase	ENOG410XR2S	Trans-2,3-enoyl-CoA	.	ExpAA=121.18^PredHel=6^Topology=i92-114o124-141i162-181o196-218i231-253o257-279i	.	GO:0042335|cuticle development;GO:0006665|sphingolipid metabolic process;GO:0010091|trichome branching;GO:1905499|trichome papilla formation;GO:0042761|very long-chain fatty acid biosynthetic process;GO:0010025|wax biosynthetic processGO:0006629|lipid metabolic process	GO:0009922|fatty acid elongase activity;GO:0016627|oxidoreductase activity, acting on the CH-CH group of donorsGO:0016627|oxidoreductase activity, acting on the CH-CH group of donors	GO:0005783|endoplasmic reticulum;GO:0005789|endoplasmic reticulum membrane;GO:0009923|fatty acid elongase complex;GO:0016021|integral component of membrane;GO:0005886|plasma membraneGO:0005737|cytoplasm;GO:0016021|integral component of membrane	K10258|TER, TSC13, CER10; very-long-chain enoyl-CoA reductase [EC:1.3.1.93]	map00062|Fatty acid elongation;map01212|Fatty acid metabolism;map01110|Biosynthesis of secondary metabolites;map01040|Biosynthesis of unsaturated fatty acids
f2p60_1615_24398	gi|743811306|ref|XM_011020680.1|	2754	E:0	PREDICTED: Populus euphratica mannan endo-1,4-beta-mannosidase 6-like (LOC105121846), transcript variant X2, mRNA	gi|743811307|ref|XP_011018982.1|	940	E:0	PREDICTED: mannan endo-1,4-beta-mannosidase 6-like isoform X2 [Populus euphratica]	MAN6_ARATH	664	E:0	RecName: Full=Mannan endo-1,4-beta-mannosidase 6;^Eukaryota; Viridiplantae; Streptophyta; Embryophyta; Tracheophyta; Spermatophyta; Magnoliophyta; eudicotyledons; Gunneridae; Pentapetalae; rosids; malvids; Brassicales; Brassicaceae; Camelineae; Arabidopsis	MAN6_ARATH	694	E:0	RecName: Full=Mannan endo-1,4-beta-mannosidase 6;^Eukaryota; Viridiplantae; Streptophyta; Embryophyta; Tracheophyta; Spermatophyta; Magnoliophyta; eudicotyledons; Gunneridae; Pentapetalae; rosids; malvids; Brassicales; Brassicaceae; Camelineae; Arabidopsis	PF00150.17	Cellulase	Cellulase (glycosyl hydrolase family 5)	COG3934	Mannan endo-1,4-beta-mannosidase	.	ExpAA=17.42^PredHel=1^Topology=i7-26o	.	GO:0046355|mannan catabolic process;GO:0009845|seed germinationGO:0005975|carbohydrate metabolic process	GO:0016985|mannan endo-1,4-beta-mannosidase activityGO:0004553|hydrolase activity, hydrolyzing O-glycosyl compounds	GO:0005576|extracellular region	K19355|MAN; mannan endo-1,4-beta-mannosidase [EC:3.2.1.78]	map00051|Fructose and mannose metabolism
f2p60_1383_26099	gi|118481014|gb|EF144197.1|	2361	E:0	Populus trichocarpa clone PX0011_C01 unknown mRNA	gi|118481015|gb|ABK92461.1|	468	E:2e-160	unknown [Populus trichocarpa]	SYP32_ARATH	293	E:1e-93	RecName: Full=Syntaxin-32;^Eukaryota; Viridiplantae; Streptophyta; Embryophyta; Tracheophyta; Spermatophyta; Magnoliophyta; eudicotyledons; Gunneridae; Pentapetalae; rosids; malvids; Brassicales; Brassicaceae; Camelineae; Arabidopsis	SYP32_ARATH	429	E:3e-148	RecName: Full=Syntaxin-32;^Eukaryota; Viridiplantae; Streptophyta; Embryophyta; Tracheophyta; Spermatophyta; Magnoliophyta; eudicotyledons; Gunneridae; Pentapetalae; rosids; malvids; Brassicales; Brassicaceae; Camelineae; Arabidopsis	PF11416.7	Syntaxin-5_N	Syntaxin-5 N-terminal, Sly1p-binding domain	ENOG410Y2MB	Syntaxin 5	.	ExpAA=20.71^PredHel=1^Topology=o317-336i	.	GO:0006888|ER to Golgi vesicle-mediated transport;GO:0006886|intracellular protein transport;GO:0048278|vesicle docking;GO:0006906|vesicle fusion	GO:0005484|SNAP receptor activity;GO:0000149|SNARE binding	GO:0000139|Golgi membrane;GO:0016021|integral component of membrane;GO:0031201|SNARE complexGO:0016020|membrane	K08490|STX5; syntaxin 5	map04130|SNARE interactions in vesicular transport
f2p60_1937_22327	gi|566155914|ref|XM_002301957.2|	2704	E:0	Populus trichocarpa Cytochrome P450 83A1 family protein (POPTR_0002s02770g) mRNA, complete cds	gi|566155915|ref|XP_002301993.2|	960	E:0	Cytochrome P450 83A1 family protein [Populus trichocarpa]	C83B1_ARATH	517	E:5e-176	RecName: Full=Cytochrome P450 83B1;^Eukaryota; Viridiplantae; Streptophyta; Embryophyta; Tracheophyta; Spermatophyta; Magnoliophyta; eudicotyledons; Gunneridae; Pentapetalae; rosids; malvids; Brassicales; Brassicaceae; Camelineae; Arabidopsis	C83B1_ARATH	549	E:0	RecName: Full=Cytochrome P450 83B1;^Eukaryota; Viridiplantae; Streptophyta; Embryophyta; Tracheophyta; Spermatophyta; Magnoliophyta; eudicotyledons; Gunneridae; Pentapetalae; rosids; malvids; Brassicales; Brassicaceae; Camelineae; Arabidopsis	PF00067.21	p450	Cytochrome P450	COG2124	Cytochrome p450	.	ExpAA=45.77^PredHel=2^Topology=o5-27i300-322o	.	GO:0048830|adventitious root development;GO:0052544|defense response by callose deposition in cell wall;GO:0042742|defense response to bacterium;GO:0009759|indole glucosinolate biosynthetic process;GO:0009684|indoleacetic acid biosynthetic process;GO:0009682|induced systemic resistance;GO:0040008|regulation of growth;GO:0010114|response to red light;GO:0009641|shade avoidance;GO:0000162|tryptopha…	GO:0020037|heme binding;GO:0005506|iron ion binding;GO:0016709|oxidoreductase activity, acting on paired donors, with incorporation or reduction of molecular oxygen, NAD(P)H as one donor, and incorporation of one atom of oxygenGO:0005506|iron ion binding;GO:0016705|oxidoreductase activity, acting on paired donors, with incorporation or reduction of molecular oxygen;GO:0020037|heme binding	GO:0005783|endoplasmic reticulum;GO:0016021|integral component of membrane;GO:0016020|membrane;GO:0005739|mitochondrion;GO:0005886|plasma membrane	K11818|CYP83B1; cytochrome P450, family 83, subfamily B, polypeptide 1 [EC:1.14.-.-]	map00966|Glucosinolate biosynthesis;map00380|Tryptophan metabolism;map01110|Biosynthesis of secondary metabolites;map01210|2-Oxocarboxylic acid metabolism
f6p60_1506_7047	gi|566189374|ref|XM_002314537.2|	2547	E:0	Populus trichocarpa b-keto acyl reductase family protein (POPTR_0010s06220g) mRNA, complete cds	gi|224107711|ref|XP_002314573.1|	614	E:0	b-keto acyl reductase family protein [Populus trichocarpa]	KCR1_ARATH	451	E:9e-155	RecName: Full=Very-long-chain 3-oxoacyl-CoA reductase 1;^Eukaryota; Viridiplantae; Streptophyta; Embryophyta; Tracheophyta; Spermatophyta; Magnoliophyta; eudicotyledons; Gunneridae; Pentapetalae; rosids; malvids; Brassicales; Brassicaceae; Camelineae; Arabidopsis	KCR1_ARATH	477	E:4e-168	RecName: Full=Very-long-chain 3-oxoacyl-CoA reductase 1;^Eukaryota; Viridiplantae; Streptophyta; Embryophyta; Tracheophyta; Spermatophyta; Magnoliophyta; eudicotyledons; Gunneridae; Pentapetalae; rosids; malvids; Brassicales; Brassicaceae; Camelineae; Arabidopsis	PF00106.24	adh_short	short chain dehydrogenase	COG0300	Dehydrogenase	.	ExpAA=38.74^PredHel=1^Topology=i13-35o	.	GO:0009793|embryo development ending in seed dormancy;GO:0042761|very long-chain fatty acid biosynthetic process	GO:0102339|3-oxo-arachidoyl-CoA reductase activity;GO:0102340|3-oxo-behenoyl-CoA reductase activity;GO:0102342|3-oxo-cerotoyl-CoA reductase activity;GO:0102341|3-oxo-lignoceroyl-CoA reductase activity;GO:0018454|acetoacetyl-CoA reductase activity;GO:0045703|ketoreductase activity	GO:0005783|endoplasmic reticulum;GO:0005789|endoplasmic reticulum membrane;GO:0016021|integral component of membrane;GO:0016020|membrane	K10251|HSD17B12, KAR, IFA38; 17beta-estradiol 17-dehydrogenase / very-long-chain 3-oxoacyl-CoA reductase [EC:1.1.1.62 1.1.1.330]	map01212|Fatty acid metabolism;map00140|Steroid hormone biosynthesis;map00062|Fatty acid elongation;map01110|Biosynthesis of secondary metabolites;map01100|Metabolic pathways;map01040|Biosynthesis of unsaturated fatty acids
f2p60_1831_5163	gi|566192294|ref|XM_002316337.2|	3243	E:0	Populus trichocarpa ribophorin 1 family protein (POPTR_0010s23030g) mRNA, complete cds	gi|566192295|ref|XP_002316373.2|	912	E:0	ribophorin 1 family protein [Populus trichocarpa]	OST1B_ARATH	680	E:0	RecName: Full=Dolichyl-diphosphooligosaccharide--protein glycosyltransferase subunit 1B;^Eukaryota; Viridiplantae; Streptophyta; Embryophyta; Tracheophyta; Spermatophyta; Magnoliophyta; eudicotyledons; Gunneridae; Pentapetalae; rosids; malvids; Brassicales; Brassicaceae; Camelineae; Arabidopsis	OST1B_ARATH	689	E:0	RecName: Full=Dolichyl-diphosphooligosaccharide--protein glycosyltransferase subunit 1B;^Eukaryota; Viridiplantae; Streptophyta; Embryophyta; Tracheophyta; Spermatophyta; Magnoliophyta; eudicotyledons; Gunneridae; Pentapetalae; rosids; malvids; Brassicales; Brassicaceae; Camelineae; Arabidopsis	PF04597.13	Ribophorin_I	Ribophorin I	ENOG410XQVZ	ribophorin I	.	ExpAA=41.93^PredHel=2^Topology=i9-26o439-461i	.	GO:0018279|protein N-linked glycosylation via asparagineGO:0006486|protein glycosylation	GO:0004579|dolichyl-diphosphooligosaccharide-protein glycotransferase activityGO:0004579|dolichyl-diphosphooligosaccharide-protein glycotransferase activity	GO:0005783|endoplasmic reticulum;GO:0016021|integral component of membrane;GO:0008250|oligosaccharyltransferase complex;GO:0009505|plant-type cell wall;GO:0005886|plasma membrane;GO:0005774|vacuolar membraneGO:0005783|endoplasmic reticulum;GO:0016021|integral component of membrane	K12666|OST1, RPN1; oligosaccharyltransferase complex subunit alpha (ribophorin I)	map04141|Protein processing in endoplasmic reticulum;map00513|Various types of N-glycan biosynthesis;map01100|Metabolic pathways;map00510|N-Glycan biosynthesis
f2p60_1228_27629	gi|566149415|ref|XM_006369053.1|	2121	E:0	Populus trichocarpa 25.3 kDa vesicle transport family protein (POPTR_0001s16590g) mRNA, complete cds	gi|743910164|ref|XP_011048585.1|	455	E:4e-158	PREDICTED: 25.3 kDa vesicle transport protein-like [Populus euphratica]	SEC22_ARATH	427	E:1e-148	RecName: Full=25.3 kDa vesicle transport protein;^Eukaryota; Viridiplantae; Streptophyta; Embryophyta; Tracheophyta; Spermatophyta; Magnoliophyta; eudicotyledons; Gunneridae; Pentapetalae; rosids; malvids; Brassicales; Brassicaceae; Camelineae; Arabidopsis	SEC22_ARATH	427	E:8e-152	RecName: Full=25.3 kDa vesicle transport protein;^Eukaryota; Viridiplantae; Streptophyta; Embryophyta; Tracheophyta; Spermatophyta; Magnoliophyta; eudicotyledons; Gunneridae; Pentapetalae; rosids; malvids; Brassicales; Brassicaceae; Camelineae; Arabidopsis	PF13774.5	Longin	Regulated-SNARE-like domain	COG5143	Vesicle-associated membrane protein	.	ExpAA=20.23^PredHel=1^Topology=i193-212o	.	GO:0006887|exocytosis;GO:0015031|protein transport;GO:0006906|vesicle fusionGO:0016192|vesicle-mediated transport	GO:0005484|SNAP receptor activity;GO:0000149|SNARE binding	GO:0005783|endoplasmic reticulum;GO:0005789|endoplasmic reticulum membrane;GO:0005794|Golgi apparatus;GO:0000139|Golgi membrane;GO:0016021|integral component of membrane;GO:0005886|plasma membrane;GO:0031201|SNARE complexGO:0016021|integral component of membrane	K08517|SEC22; vesicle transport protein SEC22	map04145|Phagosome;map04130|SNARE interactions in vesicular transport;map05134|Legionellosis
f2p60_1511_7054	gi|743907965|ref|XM_011049125.1|	2503	E:0	PREDICTED: Populus euphratica CMP-sialic acid transporter 4 (LOC105141774), transcript variant X1, mRNA	gi|743907966|ref|XP_011047427.1|	670	E:0	PREDICTED: CMP-sialic acid transporter 4 [Populus euphratica]	CSTR4_ARATH	543	E:0	RecName: Full=CMP-sialic acid transporter 4;^Eukaryota; Viridiplantae; Streptophyta; Embryophyta; Tracheophyta; Spermatophyta; Magnoliophyta; eudicotyledons; Gunneridae; Pentapetalae; rosids; malvids; Brassicales; Brassicaceae; Camelineae; Arabidopsis	CSTR4_ARATH	563	E:0	RecName: Full=CMP-sialic acid transporter 4;^Eukaryota; Viridiplantae; Streptophyta; Embryophyta; Tracheophyta; Spermatophyta; Magnoliophyta; eudicotyledons; Gunneridae; Pentapetalae; rosids; malvids; Brassicales; Brassicaceae; Camelineae; Arabidopsis	PF04142.14	Nuc_sug_transp	Nucleotide-sugar transporter	COG0697	membrane	.	ExpAA=165.08^PredHel=8^Topology=i49-68o146-168i175-192o207-228i241-258o268-290i303-320o324-346i	.	GO:0015739|sialic acid transportGO:0008643|carbohydrate transport	GO:0015136|sialic acid transmembrane transporter activity;GO:0005351|sugar:proton symporter activityGO:0005351|sugar:proton symporter activity	GO:0005768|endosome;GO:0005794|Golgi apparatus;GO:0000139|Golgi membrane;GO:0016021|integral component of membrane;GO:0005802|trans-Golgi networkGO:0000139|Golgi membrane;GO:0016021|integral component of membrane	K03012|RPB4, POLR2D; DNA-directed RNA polymerase II subunit RPB4;K15272|SLC35A1_2_3; solute carrier family 35 (UDP-sugar transporter), member A1/2/3	map03020|RNA polymerase;map00240|Pyrimidine metabolism;map05169|Epstein-Barr virus infection;map01100|Metabolic pathways;map05016|Huntington's disease;map00230|Purine metabolism
f3p60_2330_20822	gi|566207888|ref|XM_006373494.1|	4095	E:0	Populus trichocarpa hypothetical protein (POPTR_0016s00360g) mRNA, complete cds	gi|566207889|ref|XP_006373556.1|	1251	E:0	hypothetical protein POPTR_0016s00360g [Populus trichocarpa]	GAUT4_ARATH	880	E:0	RecName: Full=Probable galacturonosyltransferase 4;^Eukaryota; Viridiplantae; Streptophyta; Embryophyta; Tracheophyta; Spermatophyta; Magnoliophyta; eudicotyledons; Gunneridae; Pentapetalae; rosids; malvids; Brassicales; Brassicaceae; Camelineae; Arabidopsis	GAUT4_ARATH	909	E:0	RecName: Full=Probable galacturonosyltransferase 4;^Eukaryota; Viridiplantae; Streptophyta; Embryophyta; Tracheophyta; Spermatophyta; Magnoliophyta; eudicotyledons; Gunneridae; Pentapetalae; rosids; malvids; Brassicales; Brassicaceae; Camelineae; Arabidopsis	PF01501.19	Glyco_transf_8	Glycosyl transferase family 8	ENOG410YBFC	Galacturonosyltransferase	.	ExpAA=18.36^PredHel=1^Topology=i19-36o	.	GO:0071555|cell wall organization;GO:0045489|pectin biosynthetic process	GO:0047262|polygalacturonate 4-alpha-galacturonosyltransferase activityGO:0016757|transferase activity, transferring glycosyl groups	GO:0005794|Golgi apparatus;GO:0000139|Golgi membrane;GO:0016021|integral component of membrane	K13648|GAUT; alpha-1,4-galacturonosyltransferase [EC:2.4.1.43]	map00500|Starch and sucrose metabolism;map00520|Amino sugar and nucleotide sugar metabolism
f5p60_1805_23154	gi|743797772|ref|XM_011010667.1|	2865	E:0	PREDICTED: Populus euphratica choline/ethanolaminephosphotransferase 1 (LOC105114190), transcript variant X1, mRNA	gi|566190799|ref|XP_002315978.2|	796	E:0	ethanolaminephosphotransferase family protein [Populus trichocarpa]	AAPT1_ARATH	696	E:0	RecName: Full=Choline/ethanolaminephosphotransferase 1;^Eukaryota; Viridiplantae; Streptophyta; Embryophyta; Tracheophyta; Spermatophyta; Magnoliophyta; eudicotyledons; Gunneridae; Pentapetalae; rosids; malvids; Brassicales; Brassicaceae; Camelineae; Arabidopsis	AAPT1_ARATH	698	E:0	RecName: Full=Choline/ethanolaminephosphotransferase 1;^Eukaryota; Viridiplantae; Streptophyta; Embryophyta; Tracheophyta; Spermatophyta; Magnoliophyta; eudicotyledons; Gunneridae; Pentapetalae; rosids; malvids; Brassicales; Brassicaceae; Camelineae; Arabidopsis	PF01066.20	CDP-OH_P_transf	CDP-alcohol phosphatidyltransferase	COG5050	phosphotransferase 1	.	ExpAA=178.73^PredHel=7^Topology=o137-156i265-284o304-326i338-360o375-397i409-426o436-458i	.	GO:0006646|phosphatidylethanolamine biosynthetic processGO:0008654|phospholipid biosynthetic process	GO:0004142|diacylglycerol cholinephosphotransferase activity;GO:0004307|ethanolaminephosphotransferase activity;GO:0046872|metal ion bindingGO:0016780|phosphotransferase activity, for other substituted phosphate groups	GO:0005794|Golgi apparatus;GO:0016021|integral component of membraneGO:0016020|membrane	K00993|EPT1; ethanolaminephosphotransferase [EC:2.7.8.1]	map00440|Phosphonate and phosphinate metabolism;map01100|Metabolic pathways;map01110|Biosynthesis of secondary metabolites;map00565|Ether lipid metabolism;map00564|Glycerophospholipid metabolism
f2p60_1695_5947	gi|566153713|ref|XM_006370050.1|	2998	E:0	Populus trichocarpa hypothetical protein (POPTR_0001s39590g) mRNA, complete cds	gi|566153712|ref|XP_006370111.1|	825	E:0	transport protein sec61 [Populus trichocarpa]	SC61A_DICDI	629	E:0	RecName: Full=Protein transport protein Sec61 subunit alpha;^Eukaryota; Amoebozoa; Mycetozoa; Dictyosteliida; Dictyostelium	SC61A_DICDI	629	E:0	RecName: Full=Protein transport protein Sec61 subunit alpha;^Eukaryota; Amoebozoa; Mycetozoa; Dictyosteliida; Dictyostelium	PF00344.19	SecY	SecY translocase	COG0201	The central subunit of the protein translocation channel SecYEG. Consists of two halves formed by TMs 1-5 and 6-10. These two domains form a lateral gate at the front which open onto the bilayer between TMs 2 and 7, and are clamped together by SecE at the back. The channel is closed by both a pore ring composed of hydrophobic SecY resides and a short helix (helix 2A) on the extracellular side of …	.	ExpAA=193.08^PredHel=6^Topology=i48-70o80-102i178-200o220-242i349-371o375-394i	.	GO:0031204|posttranslational protein targeting to membrane, translocationGO:0015031|protein transport	GO:0015450|P-P-bond-hydrolysis-driven protein transmembrane transporter activity	GO:0005783|endoplasmic reticulum;GO:0005789|endoplasmic reticulum membrane;GO:0016021|integral component of membraneGO:0016020|membrane	K10956|SEC61A; protein transport protein SEC61 subunit alpha	map04141|Protein processing in endoplasmic reticulum;map05110|Vibrio cholerae infection;map04145|Phagosome;map03060|Protein export
f8p60_2156_3744	gi|566204862|ref|XM_002320548.2|	3801	E:0	Populus trichocarpa ECERIFERUM 1 family protein (POPTR_0014s17850g) mRNA, complete cds	gi|224129430|ref|XP_002320584.1|	1190	E:0	ECERIFERUM 1 family protein [Populus trichocarpa]	CER1_ARATH	770	E:0	RecName: Full=Protein ECERIFERUM 1;^Eukaryota; Viridiplantae; Streptophyta; Embryophyta; Tracheophyta; Spermatophyta; Magnoliophyta; eudicotyledons; Gunneridae; Pentapetalae; rosids; malvids; Brassicales; Brassicaceae; Camelineae; Arabidopsis	CER1_ARATH	828	E:0	RecName: Full=Protein ECERIFERUM 1;^Eukaryota; Viridiplantae; Streptophyta; Embryophyta; Tracheophyta; Spermatophyta; Magnoliophyta; eudicotyledons; Gunneridae; Pentapetalae; rosids; malvids; Brassicales; Brassicaceae; Camelineae; Arabidopsis	PF04116.12	FA_hydroxylase	Fatty acid hydroxylase superfamily	ENOG4111G66	WAX2-like	.	ExpAA=89.26^PredHel=3^Topology=i137-156o198-220i338-360o	.	GO:0043447|alkane biosynthetic process;GO:0042742|defense response to bacterium;GO:0050832|defense response to fungus;GO:0008610|lipid biosynthetic process;GO:0006629|lipid metabolic process;GO:0009414|response to water deprivation;GO:0010025|wax biosynthetic processGO:0008610|lipid biosynthetic process;GO:0055114|oxidation-reduction process	GO:0005506|iron ion binding;GO:0016491|oxidoreductase activityGO:0005506|iron ion binding;GO:0016491|oxidoreductase activity	GO:0005789|endoplasmic reticulum membrane;GO:0016021|integral component of membrane	K15404|K15404, CER1; aldehyde decarbonylase [EC:4.1.99.5]	map01110|Biosynthesis of secondary metabolites;map00073|Cutin, suberine and wax biosynthesis
f2p60_1342_8141	gi|566215055|ref|XM_002324427.2|	2255	E:0	Populus trichocarpa Peroxidase 16 precursor family protein (POPTR_0018s09710g) mRNA, complete cds	gi|224142233|ref|XP_002324463.1|	626	E:0	Peroxidase 16 precursor family protein [Populus trichocarpa]	PER45_ARATH	491	E:2e-171	RecName: Full=Peroxidase 45;^Eukaryota; Viridiplantae; Streptophyta; Embryophyta; Tracheophyta; Spermatophyta; Magnoliophyta; eudicotyledons; Gunneridae; Pentapetalae; rosids; malvids; Brassicales; Brassicaceae; Camelineae; Arabidopsis	PER45_ARATH	494	E:9e-175	RecName: Full=Peroxidase 45;^Eukaryota; Viridiplantae; Streptophyta; Embryophyta; Tracheophyta; Spermatophyta; Magnoliophyta; eudicotyledons; Gunneridae; Pentapetalae; rosids; malvids; Brassicales; Brassicaceae; Camelineae; Arabidopsis	PF00141.22	peroxidase	Peroxidase	ENOG4111S7R	peroxidase	.	ExpAA=16.29^PredHel=1^Topology=i7-24o	.	GO:0042744|hydrogen peroxide catabolic process;GO:0006979|response to oxidative stressGO:0006979|response to oxidative stress;GO:0055114|oxidation-reduction process	GO:0020037|heme binding;GO:0046872|metal ion binding;GO:0004601|peroxidase activityGO:0004601|peroxidase activity;GO:0020037|heme binding	GO:0005576|extracellular region	K00430|E1.11.1.7; peroxidase [EC:1.11.1.7]	map01100|Metabolic pathways;map00940|Phenylpropanoid biosynthesis;map01110|Biosynthesis of secondary metabolites
f4p60_2116_21545	gi|743782080|ref|XM_011012496.1|	3570	E:0	PREDICTED: Populus euphratica beta-hexosaminidase 3 (LOC105115546), mRNA	gi|743782081|ref|XP_011010798.1|	1042	E:0	PREDICTED: beta-hexosaminidase 3 [Populus euphratica]	HEXO3_ARATH	781	E:0	RecName: Full=Beta-hexosaminidase 3;^Eukaryota; Viridiplantae; Streptophyta; Embryophyta; Tracheophyta; Spermatophyta; Magnoliophyta; eudicotyledons; Gunneridae; Pentapetalae; rosids; malvids; Brassicales; Brassicaceae; Camelineae; Arabidopsis	HEXO3_ARATH	801	E:0	RecName: Full=Beta-hexosaminidase 3;^Eukaryota; Viridiplantae; Streptophyta; Embryophyta; Tracheophyta; Spermatophyta; Magnoliophyta; eudicotyledons; Gunneridae; Pentapetalae; rosids; malvids; Brassicales; Brassicaceae; Camelineae; Arabidopsis	PF14845.5	Glycohydro_20b2	beta-acetyl hexosaminidase like	COG3525	ec 3.2.1.52	.	ExpAA=21.35^PredHel=1^Topology=i7-29o	.	GO:0005975|carbohydrate metabolic processGO:0005975|carbohydrate metabolic process	GO:0004563|beta-N-acetylhexosaminidase activity;GO:0015929|hexosaminidase activityGO:0004553|hydrolase activity, hydrolyzing O-glycosyl compounds	GO:0005618|cell wall;GO:0009505|plant-type cell wall;GO:0005886|plasma membrane	K12373|HEXA_B; hexosaminidase [EC:3.2.1.52]	map04142|Lysosome;map00511|Other glycan degradation;map00531|Glycosaminoglycan degradation;map00604|Glycosphingolipid biosynthesis - ganglio series;map00520|Amino sugar and nucleotide sugar metabolism;map01100|Metabolic pathways;map00603|Glycosphingolipid biosynthesis - globo series
f2p60_1392_26064	gi|566191768|ref|XM_002315139.2|	2455	E:0	Populus trichocarpa peroxisomal membrane family protein (POPTR_0010s20000g) mRNA, complete cds	gi|224109374|ref|XP_002315175.1|	642	E:0	peroxisomal membrane family protein [Populus trichocarpa]	PXN_ARATH	460	E:9e-159	RecName: Full=Peroxisomal nicotinamide adenine dinucleotide carrier;^Eukaryota; Viridiplantae; Streptophyta; Embryophyta; Tracheophyta; Spermatophyta; Magnoliophyta; eudicotyledons; Gunneridae; Pentapetalae; rosids; malvids; Brassicales; Brassicaceae; Camelineae; Arabidopsis	PXN_ARATH	482	E:1e-168	RecName: Full=Peroxisomal nicotinamide adenine dinucleotide carrier;^Eukaryota; Viridiplantae; Streptophyta; Embryophyta; Tracheophyta; Spermatophyta; Magnoliophyta; eudicotyledons; Gunneridae; Pentapetalae; rosids; malvids; Brassicales; Brassicaceae; Camelineae; Arabidopsis	PF00153.26	Mito_carr	Mitochondrial carrier protein	ENOG410ZNC0	peroxisomal membrane protein	.	ExpAA=131.19^PredHel=6^Topology=i21-43o53-75i112-134o164-186i237-259o283-305i	.	GO:0006839|mitochondrial transport;GO:0043132|NAD transport;GO:0015858|nucleoside transport;GO:0044375|regulation of peroxisome size	GO:0015217|ADP transmembrane transporter activity;GO:0080122|AMP transmembrane transporter activity;GO:0015297|antiporter activity;GO:0005347|ATP transmembrane transporter activity;GO:0015228|coenzyme A transmembrane transporter activity;GO:0015230|FAD transmembrane transporter activity;GO:0044610|FMN transmembrane transporter activity;GO:0051724|NAD transporter activity	GO:0046861|glyoxysomal membrane;GO:0005779|integral component of peroxisomal membrane;GO:0005743|mitochondrial inner membrane;GO:0005777|peroxisome;GO:0005774|vacuolar membrane	K13354|SLC25A17, PMP34; solute carrier family 25 (peroxisomal adenine nucleotide transporter), member 17	map04146|Peroxisome
f3p26_2761_19725	gi|566197121|ref|XM_002318555.2|	4892	E:0	Populus trichocarpa Diacylglycerol kinase 1 family protein (POPTR_0012s06780g) mRNA, complete cds	gi|224121474|ref|XP_002318591.1|	1475	E:0	Diacylglycerol kinase 1 family protein [Populus trichocarpa]	DGK1_ARATH	1155	E:0	RecName: Full=Diacylglycerol kinase 1;^Eukaryota; Viridiplantae; Streptophyta; Embryophyta; Tracheophyta; Spermatophyta; Magnoliophyta; eudicotyledons; Gunneridae; Pentapetalae; rosids; malvids; Brassicales; Brassicaceae; Camelineae; Arabidopsis	DGK1_ARATH	1177	E:0	RecName: Full=Diacylglycerol kinase 1;^Eukaryota; Viridiplantae; Streptophyta; Embryophyta; Tracheophyta; Spermatophyta; Magnoliophyta; eudicotyledons; Gunneridae; Pentapetalae; rosids; malvids; Brassicales; Brassicaceae; Camelineae; Arabidopsis	PF00130.21	C1_1	Phorbol esters/diacylglycerol binding domain (C1 domain)	ENOG410XQVB	DiacylGlycerol Kinase	.	ExpAA=22.76^PredHel=1^Topology=i21-43o	.	GO:0006952|defense response;GO:0035556|intracellular signal transduction;GO:0007205|protein kinase C-activating G-protein coupled receptor signaling pathwayGO:0035556|intracellular signal transduction;GO:0007205|protein kinase C-activating G-protein coupled receptor signaling pathway	GO:0005524|ATP binding;GO:0005509|calcium ion binding;GO:0003951|NAD+ kinase activityGO:0016301|kinase activity;GO:0004143|diacylglycerol kinase activity	GO:0016021|integral component of membrane;GO:0005622|intracellular	K00901|dgkA, DGK; diacylglycerol kinase (ATP) [EC:2.7.1.107]	map04070|Phosphatidylinositol signaling system;map00561|Glycerolipid metabolism;map00564|Glycerophospholipid metabolism;map01110|Biosynthesis of secondary metabolites;map01100|Metabolic pathways;map05231|Choline metabolism in cancer
f2p60_1983_4353	gi|566152276|ref|XM_002298643.2|	3441	E:0	Populus trichocarpa UDP-D-GLUCURONATE 4-EPIMERASE 6 family protein (POPTR_0001s32730g) mRNA, complete cds	gi|224055839|ref|XP_002298679.1|	884	E:0	UDP-D-GLUCURONATE 4-EPIMERASE 6 family protein [Populus trichocarpa]	GAE6_ARATH	715	E:0	RecName: Full=UDP-glucuronate 4-epimerase 6;^Eukaryota; Viridiplantae; Streptophyta; Embryophyta; Tracheophyta; Spermatophyta; Magnoliophyta; eudicotyledons; Gunneridae; Pentapetalae; rosids; malvids; Brassicales; Brassicaceae; Camelineae; Arabidopsis	GAE6_ARATH	756	E:0	RecName: Full=UDP-glucuronate 4-epimerase 6;^Eukaryota; Viridiplantae; Streptophyta; Embryophyta; Tracheophyta; Spermatophyta; Magnoliophyta; eudicotyledons; Gunneridae; Pentapetalae; rosids; malvids; Brassicales; Brassicaceae; Camelineae; Arabidopsis	PF01370.20	Epimerase	NAD dependent epimerase/dehydratase family	COG0451	Nad-dependent epimerase dehydratase	.	ExpAA=43.47^PredHel=1^Topology=i35-57o	.	GO:0050832|defense response to fungus;GO:0050829|defense response to Gram-negative bacterium;GO:0033481|galacturonate biosynthetic processGO:0006694|steroid biosynthetic process;GO:0055114|oxidation-reduction process	GO:0050378|UDP-glucuronate 4-epimerase activityGO:0003824|catalytic activity;GO:0050662|coenzyme binding;GO:0003854|3-beta-hydroxy-delta5-steroid dehydrogenase activity;GO:0016616|oxidoreductase activity, acting on the CH-OH group of donors, NAD or NADP as acceptor	GO:0005768|endosome;GO:0005794|Golgi apparatus;GO:0032580|Golgi cisterna membrane;GO:0016021|integral component of membrane;GO:0005802|trans-Golgi network	K08679|E5.1.3.6; UDP-glucuronate 4-epimerase [EC:5.1.3.6]	map01100|Metabolic pathways;map00500|Starch and sucrose metabolism;map00520|Amino sugar and nucleotide sugar metabolism
f6p60_1219_27686	gi|566154025|ref|XM_006370206.1|	2126	E:0	Populus trichocarpa cytidylyltransferase family protein (POPTR_0001s41150g) mRNA, complete cds	gi|566154026|ref|XP_006370268.1|	548	E:0	cytidylyltransferase family protein [Populus trichocarpa]	KDSB_ARATH	481	E:9e-169	RecName: Full=3-deoxy-manno-octulosonate cytidylyltransferase, mitochondrial {ECO:0000303|PubMed:21893514};^Eukaryota; Viridiplantae; Streptophyta; Embryophyta; Tracheophyta; Spermatophyta; Magnoliophyta; eudicotyledons; Gunneridae; Pentapetalae; rosids; malvids; Brassicales; Brassicaceae; Camelineae; Arabidopsis	KDSB_ARATH	492	E:6e-175	RecName: Full=3-deoxy-manno-octulosonate cytidylyltransferase, mitochondrial {ECO:0000303|PubMed:21893514};^Eukaryota; Viridiplantae; Streptophyta; Embryophyta; Tracheophyta; Spermatophyta; Magnoliophyta; eudicotyledons; Gunneridae; Pentapetalae; rosids; malvids; Brassicales; Brassicaceae; Camelineae; Arabidopsis	PF02348.18	CTP_transf_3	Cytidylyltransferase	COG1212	Activates KDO (a required 8-carbon sugar) for incorporation into bacterial lipopolysaccharide in Gram-negative bacteria (By similarity)	.	ExpAA=22.81^PredHel=1^Topology=i13-35o	.	GO:0071555|cell wall organization;GO:0033468|CMP-keto-3-deoxy-D-manno-octulosonic acid biosynthetic process;GO:0009555|pollen development;GO:0009860|pollen tube growth	GO:0008690|3-deoxy-manno-octulosonate cytidylyltransferase activityGO:0070567|cytidylyltransferase activity	GO:0031307|integral component of mitochondrial outer membrane;GO:0005739|mitochondrion	K00979|kdsB; 3-deoxy-manno-octulosonate cytidylyltransferase (CMP-KDO synthetase) [EC:2.7.7.38]	map00540|Lipopolysaccharide biosynthesis;map01100|Metabolic pathways
f2p60_1884_4813	gi|566194874|ref|XM_002316814.2|	3205	E:0	Populus trichocarpa transport protein sec61 (POPTR_0011s10920g) mRNA, complete cds	gi|224114762|ref|XP_002316850.1|	961	E:0	transport protein sec61 [Populus trichocarpa]	SC61A_DICDI	724	E:0	RecName: Full=Protein transport protein Sec61 subunit alpha;^Eukaryota; Amoebozoa; Mycetozoa; Dictyosteliida; Dictyostelium	SC61A_DICDI	725	E:0	RecName: Full=Protein transport protein Sec61 subunit alpha;^Eukaryota; Amoebozoa; Mycetozoa; Dictyosteliida; Dictyostelium	PF10559.8	Plug_translocon	Plug domain of Sec61p	COG0201	The central subunit of the protein translocation channel SecYEG. Consists of two halves formed by TMs 1-5 and 6-10. These two domains form a lateral gate at the front which open onto the bilayer between TMs 2 and 7, and are clamped together by SecE at the back. The channel is closed by both a pore ring composed of hydrophobic SecY resides and a short helix (helix 2A) on the extracellular side of …	.	ExpAA=225.76^PredHel=8^Topology=i34-56o76-98i119-141o146-168i244-266o286-308i415-437o441-460i	.	GO:0031204|posttranslational protein targeting to membrane, translocationGO:0015031|protein transport	GO:0015450|P-P-bond-hydrolysis-driven protein transmembrane transporter activity	GO:0005783|endoplasmic reticulum;GO:0005789|endoplasmic reticulum membrane;GO:0016021|integral component of membraneGO:0016020|membrane	K10956|SEC61A; protein transport protein SEC61 subunit alpha	map04141|Protein processing in endoplasmic reticulum;map05110|Vibrio cholerae infection;map04145|Phagosome;map03060|Protein export
f2p49_2397_2998	gi|566210577|ref|XM_006372310.1|	4071	E:0	Populus trichocarpa DNAJ heat shock N-terminal domain-containing family protein (POPTR_0017s00980g) mRNA, complete cds	gi|566210578|ref|XP_006372372.1|	1235	E:0	DNAJ heat shock N-terminal domain-containing family protein [Populus trichocarpa]	DNJ21_ARATH	1038	E:0	RecName: Full=DnaJ protein ERDJ2A;^Eukaryota; Viridiplantae; Streptophyta; Embryophyta; Tracheophyta; Spermatophyta; Magnoliophyta; eudicotyledons; Gunneridae; Pentapetalae; rosids; malvids; Brassicales; Brassicaceae; Camelineae; Arabidopsis	DNJ21_ARATH	1055	E:0	RecName: Full=DnaJ protein ERDJ2A;^Eukaryota; Viridiplantae; Streptophyta; Embryophyta; Tracheophyta; Spermatophyta; Magnoliophyta; eudicotyledons; Gunneridae; Pentapetalae; rosids; malvids; Brassicales; Brassicaceae; Camelineae; Arabidopsis	PF00226.30	DnaJ	DnaJ domain	COG5407	translocation protein SEC63	.	ExpAA=71.05^PredHel=3^Topology=o10-32i66-88o192-214i	.	GO:0031204|posttranslational protein targeting to membrane, translocation	GO:0008565|protein transporter activity	GO:0005783|endoplasmic reticulum;GO:0005794|Golgi apparatus;GO:0030176|integral component of endoplasmic reticulum membrane;GO:0005739|mitochondrion;GO:0005886|plasma membrane	K09540|SEC63, DNAJC23; translocation protein SEC63	map04141|Protein processing in endoplasmic reticulum;map03060|Protein export
f2p22_4916_101	gi|743932324|ref|XM_011012146.1|	8094	E:0	PREDICTED: Populus euphratica ethylene-insensitive protein 2-like (LOC105115312), transcript variant X1, mRNA	gi|566209465|ref|XP_006373880.1|	2277	E:0	hypothetical protein POPTR_0016s09210g [Populus trichocarpa]	EIN2_ARATH	1169	E:0	RecName: Full=Ethylene-insensitive protein 2 {ECO:0000303|PubMed:10381874};^Eukaryota; Viridiplantae; Streptophyta; Embryophyta; Tracheophyta; Spermatophyta; Magnoliophyta; eudicotyledons; Gunneridae; Pentapetalae; rosids; malvids; Brassicales; Brassicaceae; Camelineae; Arabidopsis	EIN2_ARATH	1198	E:0	RecName: Full=Ethylene-insensitive protein 2 {ECO:0000303|PubMed:10381874};^Eukaryota; Viridiplantae; Streptophyta; Embryophyta; Tracheophyta; Spermatophyta; Magnoliophyta; eudicotyledons; Gunneridae; Pentapetalae; rosids; malvids; Brassicales; Brassicaceae; Camelineae; Arabidopsis	PF01566.17	Nramp	Natural resistance-associated macrophage protein	COG1914	H( )-stimulated, divalent metal cation uptake system (By similarity)	.	ExpAA=184.11^PredHel=8^Topology=o10-32i39-61o81-103i116-138o171-193i214-236o240-262i275-297o	.	GO:0009926|auxin polar transport;GO:0009734|auxin-activated signaling pathway;GO:0051301|cell division;GO:0071281|cellular response to iron ion;GO:0009736|cytokinin-activated signaling pathway;GO:0052544|defense response by callose deposition in cell wall;GO:0042742|defense response to bacterium;GO:0050832|defense response to fungus;GO:0001736|establishment of planar polarity;GO:0009873|ethylene-…	GO:0003729|mRNA binding;GO:0005215|transporter activityGO:0005215|transporter activity	GO:0005789|endoplasmic reticulum membrane;GO:0016021|integral component of membrane;GO:0005634|nucleusGO:0016020|membrane	K14513|EIN2; ethylene-insensitive protein 2;K14513|EIN2; ethylene-insensitive protein 2	map04075|Plant hormone signal transduction;map04075|Plant hormone signal transduction
f2p22_4916_101	gi|743932324|ref|XM_011012146.1|	8094	E:0	PREDICTED: Populus euphratica ethylene-insensitive protein 2-like (LOC105115312), transcript variant X1, mRNA	gi|566209465|ref|XP_006373880.1|	2277	E:0	hypothetical protein POPTR_0016s09210g [Populus trichocarpa]	EIN2_ARATH	1169	E:0	RecName: Full=Ethylene-insensitive protein 2 {ECO:0000303|PubMed:10381874};^Eukaryota; Viridiplantae; Streptophyta; Embryophyta; Tracheophyta; Spermatophyta; Magnoliophyta; eudicotyledons; Gunneridae; Pentapetalae; rosids; malvids; Brassicales; Brassicaceae; Camelineae; Arabidopsis	EIN2_ARATH	1198	E:1e-56	RecName: Full=Ethylene-insensitive protein 2 {ECO:0000303|PubMed:10381874};^Eukaryota; Viridiplantae; Streptophyta; Embryophyta; Tracheophyta; Spermatophyta; Magnoliophyta; eudicotyledons; Gunneridae; Pentapetalae; rosids; malvids; Brassicales; Brassicaceae; Camelineae; Arabidopsis	PF01566.17	Nramp	Natural resistance-associated macrophage protein	COG1914	H( )-stimulated, divalent metal cation uptake system (By similarity)	.	ExpAA=65.52^PredHel=3^Topology=i13-33o53-75i96-118o	.	GO:0009926|auxin polar transport;GO:0009734|auxin-activated signaling pathway;GO:0051301|cell division;GO:0071281|cellular response to iron ion;GO:0009736|cytokinin-activated signaling pathway;GO:0052544|defense response by callose deposition in cell wall;GO:0042742|defense response to bacterium;GO:0050832|defense response to fungus;GO:0001736|establishment of planar polarity;GO:0009873|ethylene-…	GO:0003729|mRNA binding;GO:0005215|transporter activityGO:0005215|transporter activity	GO:0005789|endoplasmic reticulum membrane;GO:0016021|integral component of membrane;GO:0005634|nucleusGO:0016020|membrane	K14513|EIN2; ethylene-insensitive protein 2;K14513|EIN2; ethylene-insensitive protein 2	map04075|Plant hormone signal transduction;map04075|Plant hormone signal transduction
f2p60_1784_23269	gi|566213291|ref|XM_006373412.1|	3085	E:0	Populus trichocarpa hypothetical protein (POPTR_0017s14110g) mRNA, complete cds	gi|566213292|ref|XP_006373474.1|	815	E:0	hypothetical protein POPTR_0017s14110g [Populus trichocarpa]	ICME_ARATH	539	E:0	RecName: Full=Isoprenylcysteine alpha-carbonyl methylesterase ICME;^Eukaryota; Viridiplantae; Streptophyta; Embryophyta; Tracheophyta; Spermatophyta; Magnoliophyta; eudicotyledons; Gunneridae; Pentapetalae; rosids; malvids; Brassicales; Brassicaceae; Camelineae; Arabidopsis	ICME_ARATH	595	E:0	RecName: Full=Isoprenylcysteine alpha-carbonyl methylesterase ICME;^Eukaryota; Viridiplantae; Streptophyta; Embryophyta; Tracheophyta; Spermatophyta; Magnoliophyta; eudicotyledons; Gunneridae; Pentapetalae; rosids; malvids; Brassicales; Brassicaceae; Camelineae; Arabidopsis	PF00135.27	COesterase	Carboxylesterase family	COG0657	alpha beta hydrolase fold-3 domain protein	.	ExpAA=37.86^PredHel=1^Topology=i133-155o	.	GO:0009056|catabolic process;GO:0009737|response to abscisic acidGO:0008152|metabolic process;GO:0006508|proteolysis	GO:0010296|prenylcysteine methylesterase activityGO:0016787|hydrolase activity;GO:0008236|serine-type peptidase activity	GO:0005789|endoplasmic reticulum membrane;GO:0000139|Golgi membrane;GO:0016021|integral component of membrane;GO:0016020|membrane	K15889|PCME; prenylcysteine alpha-carboxyl methylesterase [EC:3.1.1.-]	map00900|Terpenoid backbone biosynthesis;map01120|Microbial metabolism in diverse environments;map01130|Biosynthesis of antibiotics
f4p60_1255_27327	gi|566185929|ref|XM_002313455.2|	2161	E:0	Populus trichocarpa hypothetical protein (POPTR_0009s02410g) mRNA, complete cds	gi|224104591|ref|XP_002313491.1|	408	E:1e-139	hypothetical protein POPTR_0009s02410g [Populus trichocarpa]	VA714_ARATH	367	E:7e-125	RecName: Full=Vesicle-associated membrane protein 714 {ECO:0000303|PubMed:11115874};^Eukaryota; Viridiplantae; Streptophyta; Embryophyta; Tracheophyta; Spermatophyta; Magnoliophyta; eudicotyledons; Gunneridae; Pentapetalae; rosids; malvids; Brassicales; Brassicaceae; Camelineae; Arabidopsis	VA714_ARATH	406	E:2e-143	RecName: Full=Vesicle-associated membrane protein 714 {ECO:0000303|PubMed:11115874};^Eukaryota; Viridiplantae; Streptophyta; Embryophyta; Tracheophyta; Spermatophyta; Magnoliophyta; eudicotyledons; Gunneridae; Pentapetalae; rosids; malvids; Brassicales; Brassicaceae; Camelineae; Arabidopsis	PF13774.5	Longin	Regulated-SNARE-like domain	COG5143	Vesicle-associated membrane protein	.	ExpAA=23.55^PredHel=1^Topology=i190-215o	.	GO:0006887|exocytosis;GO:0015031|protein transport;GO:0009651|response to salt stress;GO:0006906|vesicle fusionGO:0016192|vesicle-mediated transport	GO:0005484|SNAP receptor activity;GO:0000149|SNARE binding	GO:0005794|Golgi apparatus;GO:0000139|Golgi membrane;GO:0016021|integral component of membrane;GO:0031201|SNARE complex;GO:0005773|vacuoleGO:0016021|integral component of membrane	K08515|VAMP7; vesicle-associated membrane protein 7	map04130|SNARE interactions in vesicular transport
f2p60_1301_8430	gi|566199756|ref|XM_002319164.2|	2191	E:0	Populus trichocarpa hypothetical protein (POPTR_0013s06360g) mRNA, complete cds	gi|224123934|ref|XP_002319200.1|	546	E:0	hypothetical protein POPTR_0013s06360g [Populus trichocarpa]	NB5R1_ARATH	461	E:2e-160	RecName: Full=NADH--cytochrome b5 reductase 1;^Eukaryota; Viridiplantae; Streptophyta; Embryophyta; Tracheophyta; Spermatophyta; Magnoliophyta; eudicotyledons; Gunneridae; Pentapetalae; rosids; malvids; Brassicales; Brassicaceae; Camelineae; Arabidopsis	NB5R1_ARATH	464	E:4e-164	RecName: Full=NADH--cytochrome b5 reductase 1;^Eukaryota; Viridiplantae; Streptophyta; Embryophyta; Tracheophyta; Spermatophyta; Magnoliophyta; eudicotyledons; Gunneridae; Pentapetalae; rosids; malvids; Brassicales; Brassicaceae; Camelineae; Arabidopsis	PF00970.23	FAD_binding_6	Oxidoreductase FAD-binding domain	COG0543	cytochrome-b5 reductase activity, acting on NAD(P)H	.	ExpAA=28.24^PredHel=1^Topology=i13-32o	.	GO:0022900|electron transport chainGO:0055114|oxidation-reduction process	GO:0004128|cytochrome-b5 reductase activity, acting on NAD(P)HGO:0016491|oxidoreductase activity	GO:0005783|endoplasmic reticulum;GO:0016021|integral component of membrane;GO:0005741|mitochondrial outer membrane;GO:0009505|plant-type cell wall;GO:0005886|plasma membrane	K00326|E1.6.2.2; cytochrome-b5 reductase [EC:1.6.2.2]	map00520|Amino sugar and nucleotide sugar metabolism
f2p60_1869_4916	gi|566203201|ref|XM_002320102.2|	3338	E:0	Populus trichocarpa phospholipid/glycerol acyltransferase family protein (POPTR_0014s08130g) mRNA, complete cds	gi|224127696|ref|XP_002320138.1|	898	E:0	phospholipid/glycerol acyltransferase family protein [Populus trichocarpa]	GPAT8_ARATH	757	E:0	RecName: Full=Probable glycerol-3-phosphate acyltransferase 8;^Eukaryota; Viridiplantae; Streptophyta; Embryophyta; Tracheophyta; Spermatophyta; Magnoliophyta; eudicotyledons; Gunneridae; Pentapetalae; rosids; malvids; Brassicales; Brassicaceae; Camelineae; Arabidopsis	GPAT8_ARATH	829	E:0	RecName: Full=Probable glycerol-3-phosphate acyltransferase 8;^Eukaryota; Viridiplantae; Streptophyta; Embryophyta; Tracheophyta; Spermatophyta; Magnoliophyta; eudicotyledons; Gunneridae; Pentapetalae; rosids; malvids; Brassicales; Brassicaceae; Camelineae; Arabidopsis	PF12710.6	HAD	haloacid dehalogenase-like hydrolase	ENOG4111C4N	glycerol-3-phosphate acyltransferase	.	ExpAA=52.35^PredHel=2^Topology=o50-72i245-267o	.	GO:0016024|CDP-diacylglycerol biosynthetic process;GO:0010143|cutin biosynthetic processGO:0008152|metabolic process	GO:0090447|glycerol-3-phosphate 2-O-acyltransferase activity;GO:0004366|glycerol-3-phosphate O-acyltransferase activity;GO:0016791|phosphatase activityGO:0016746|transferase activity, transferring acyl groups	GO:0005783|endoplasmic reticulum;GO:0016021|integral component of membrane;GO:0016020|membrane	K13508|GPAT; glycerol-3-phosphate acyltransferase [EC:2.3.1.15]	map01110|Biosynthesis of secondary metabolites;map00561|Glycerolipid metabolism;map01100|Metabolic pathways;map00564|Glycerophospholipid metabolism
f2p60_947_30591	gi|118487150|gb|EF147390.1|	1576	E:0	Populus trichocarpa clone WS01230_E23 unknown mRNA	gi|224129342|ref|XP_002320562.1|	359	E:5e-122	Photosystem I reaction center subunit XI family protein [Populus trichocarpa]	PSAL_ARATH	300	E:7e-100	RecName: Full=Photosystem I reaction center subunit XI, chloroplastic;^Eukaryota; Viridiplantae; Streptophyta; Embryophyta; Tracheophyta; Spermatophyta; Magnoliophyta; eudicotyledons; Gunneridae; Pentapetalae; rosids; malvids; Brassicales; Brassicaceae; Camelineae; Arabidopsis	PSAL_ARATH	310	E:1e-105	RecName: Full=Photosystem I reaction center subunit XI, chloroplastic;^Eukaryota; Viridiplantae; Streptophyta; Embryophyta; Tracheophyta; Spermatophyta; Magnoliophyta; eudicotyledons; Gunneridae; Pentapetalae; rosids; malvids; Brassicales; Brassicaceae; Camelineae; Arabidopsis	PF02605.14	PsaL	Photosystem I reaction centre subunit XI	ENOG4111KFU	photosystem I reaction center	.	ExpAA=50.51^PredHel=2^Topology=i131-153o187-209i	.	GO:0015979|photosynthesisGO:0015979|photosynthesis	GO:0019904|protein domain specific binding	GO:0009507|chloroplast;GO:0009941|chloroplast envelope;GO:0031969|chloroplast membrane;GO:0009534|chloroplast thylakoid;GO:0009535|chloroplast thylakoid membrane;GO:0016021|integral component of membrane;GO:0016020|membrane;GO:0009538|photosystem I reaction center;GO:0010287|plastoglobule;GO:0009579|thylakoidGO:0009522|photosystem I;GO:0009538|photosystem I reaction center	K02699|psaL; photosystem I subunit XI	map01100|Metabolic pathways;map00195|Photosynthesis
f2p47_4809_124	gi|743910074|ref|XM_011050235.1|	7925	E:0	PREDICTED: Populus euphratica ethylene-insensitive protein 2-like (LOC105142554), transcript variant X1, mRNA	gi|566176027|ref|XP_006381444.1|	2438	E:0	hypothetical protein POPTR_0006s12900g [Populus trichocarpa]	EIN2_ARATH	1253	E:0	RecName: Full=Ethylene-insensitive protein 2 {ECO:0000303|PubMed:10381874};^Eukaryota; Viridiplantae; Streptophyta; Embryophyta; Tracheophyta; Spermatophyta; Magnoliophyta; eudicotyledons; Gunneridae; Pentapetalae; rosids; malvids; Brassicales; Brassicaceae; Camelineae; Arabidopsis	EIN2_ARATH	1350	E:0	RecName: Full=Ethylene-insensitive protein 2 {ECO:0000303|PubMed:10381874};^Eukaryota; Viridiplantae; Streptophyta; Embryophyta; Tracheophyta; Spermatophyta; Magnoliophyta; eudicotyledons; Gunneridae; Pentapetalae; rosids; malvids; Brassicales; Brassicaceae; Camelineae; Arabidopsis	PF01566.17	Nramp	Natural resistance-associated macrophage protein	COG1914	H( )-stimulated, divalent metal cation uptake system (By similarity)	.	ExpAA=253.02^PredHel=11^Topology=i13-32o52-74i95-117o132-149i156-178o198-220i233-255o288-310i331-353o357-379i392-414o	.	GO:0009926|auxin polar transport;GO:0009734|auxin-activated signaling pathway;GO:0051301|cell division;GO:0071281|cellular response to iron ion;GO:0009736|cytokinin-activated signaling pathway;GO:0052544|defense response by callose deposition in cell wall;GO:0042742|defense response to bacterium;GO:0050832|defense response to fungus;GO:0001736|establishment of planar polarity;GO:0009873|ethylene-…	GO:0003729|mRNA binding;GO:0005215|transporter activityGO:0005215|transporter activity	GO:0005789|endoplasmic reticulum membrane;GO:0016021|integral component of membrane;GO:0005634|nucleusGO:0016020|membrane	K14513|EIN2; ethylene-insensitive protein 2	map04075|Plant hormone signal transduction
f5p60_1472_25580	gi|566176390|ref|XM_006381559.1|	2451	E:0	Populus trichocarpa early leaf senescence abundant cysteine protease family protein (POPTR_0006s14400g) mRNA, complete cds	gi|566176391|ref|XP_006381621.1|	738	E:0	early leaf senescence abundant cysteine protease family protein [Populus trichocarpa]	ALEUL_ARATH	597	E:0	RecName: Full=Thiol protease aleurain-like;^Eukaryota; Viridiplantae; Streptophyta; Embryophyta; Tracheophyta; Spermatophyta; Magnoliophyta; eudicotyledons; Gunneridae; Pentapetalae; rosids; malvids; Brassicales; Brassicaceae; Camelineae; Arabidopsis	ALEUL_ARATH	597	E:0	RecName: Full=Thiol protease aleurain-like;^Eukaryota; Viridiplantae; Streptophyta; Embryophyta; Tracheophyta; Spermatophyta; Magnoliophyta; eudicotyledons; Gunneridae; Pentapetalae; rosids; malvids; Brassicales; Brassicaceae; Camelineae; Arabidopsis	PF08246.11	Inhibitor_I29	Cathepsin propeptide inhibitor domain (I29)	COG4870	cathepsin	.	ExpAA=16.92^PredHel=1^Topology=i7-25o	.	GO:0006955|immune response;GO:0051603|proteolysis involved in cellular protein catabolic processGO:0006508|proteolysis	GO:0004197|cysteine-type endopeptidase activityGO:0008234|cysteine-type peptidase activity;GO:0004197|cysteine-type endopeptidase activity	GO:0005615|extracellular space;GO:0005764|lysosome	K01366|CTSH; cathepsin H [EC:3.4.22.16]	map04142|Lysosome
f2p24_3500_18587	gi|743910277|ref|XM_011050344.1|	6067	E:0	PREDICTED: Populus euphratica ATPase 10, plasma membrane-type-like (LOC105142626), transcript variant X1, mRNA	gi|566149322|ref|XP_006369068.1|	1819	E:0	putative plasma membrane H+ ATPase family protein [Populus trichocarpa]	PMA10_ARATH	1439	E:0	RecName: Full=ATPase 10, plasma membrane-type;^Eukaryota; Viridiplantae; Streptophyta; Embryophyta; Tracheophyta; Spermatophyta; Magnoliophyta; eudicotyledons; Gunneridae; Pentapetalae; rosids; malvids; Brassicales; Brassicaceae; Camelineae; Arabidopsis	PMA10_ARATH	1533	E:0	RecName: Full=ATPase 10, plasma membrane-type;^Eukaryota; Viridiplantae; Streptophyta; Embryophyta; Tracheophyta; Spermatophyta; Magnoliophyta; eudicotyledons; Gunneridae; Pentapetalae; rosids; malvids; Brassicales; Brassicaceae; Camelineae; Arabidopsis	PF00690.25	Cation_ATPase_N	Cation transporter/ATPase, N-terminus	COG0474	P-type atpase	.	ExpAA=183.55^PredHel=8^Topology=i69-91o101-120i248-270o285-307i652-674o716-738i790-812o822-841i	.	GO:0006754|ATP biosynthetic process;GO:0010023|proanthocyanidin biosynthetic process;GO:0010214|seed coat development;GO:0007035|vacuolar acidification;GO:0007033|vacuole organization	GO:0005524|ATP binding;GO:0015662|ATPase activity, coupled to transmembrane movement of ions, phosphorylative mechanism;GO:0019829|cation-transporting ATPase activity;GO:0008553|hydrogen-exporting ATPase activity, phosphorylative mechanism;GO:0046872|metal ion binding	GO:0009507|chloroplast;GO:0016021|integral component of membrane;GO:0009705|plant-type vacuole membrane;GO:0009506|plasmodesma	K01535|E3.6.3.6; H+-transporting ATPase [EC:3.6.3.6]	map00190|Oxidative phosphorylation
f2p55_2283_20963	gi|743810156|ref|XM_011020370.1|	3849	E:0	PREDICTED: Populus euphratica uncharacterized LOC105121640 (LOC105121640), mRNA	gi|743810157|ref|XP_011018672.1|	747	E:0	PREDICTED: uncharacterized protein LOC105121640 [Populus euphratica]	PI5K5_ARATH	99.4	E:5e-20	RecName: Full=Phosphatidylinositol 4-phosphate 5-kinase 5;^Eukaryota; Viridiplantae; Streptophyta; Embryophyta; Tracheophyta; Spermatophyta; Magnoliophyta; eudicotyledons; Gunneridae; Pentapetalae; rosids; malvids; Brassicales; Brassicaceae; Camelineae; Arabidopsis	PI5K5_ARATH	116	E:4e-26	RecName: Full=Phosphatidylinositol 4-phosphate 5-kinase 5;^Eukaryota; Viridiplantae; Streptophyta; Embryophyta; Tracheophyta; Spermatophyta; Magnoliophyta; eudicotyledons; Gunneridae; Pentapetalae; rosids; malvids; Brassicales; Brassicaceae; Camelineae; Arabidopsis	PF02493.19	MORN	MORN repeat	COG4642	whole genome shotgun sequence	.	ExpAA=44.79^PredHel=2^Topology=o167-186i193-215o	.	GO:0046488|phosphatidylinositol metabolic process;GO:0009827|plant-type cell wall modification;GO:0009846|pollen germination;GO:0009860|pollen tube growth	GO:0016308|1-phosphatidylinositol-4-phosphate 5-kinase activity;GO:0005524|ATP binding	GO:0016324|apical plasma membrane;GO:0005829|cytosol;GO:0090406|pollen tube	K00889|PIP5K; 1-phosphatidylinositol-4-phosphate 5-kinase [EC:2.7.1.68]	map00562|Inositol phosphate metabolism;map04144|Endocytosis;map04070|Phosphatidylinositol signaling system;map05231|Choline metabolism in cancer;map01100|Metabolic pathways;map04666|Fc gamma R-mediated phagocytosis;map04810|Regulation of actin cytoskeleton
f4p60_4431_221	gi|566183385|ref|XM_002311375.2|	7753	E:0	Populus trichocarpa hypothetical protein (POPTR_0008s11060g) mRNA, complete cds	gi|224099229|ref|XP_002311411.1|	2445	E:0	hypothetical protein POPTR_0008s11060g [Populus trichocarpa]	ALA9_ARATH	1770	E:0	RecName: Full=Putative phospholipid-transporting ATPase 9 {ECO:0000303|PubMed:11402198};^Eukaryota; Viridiplantae; Streptophyta; Embryophyta; Tracheophyta; Spermatophyta; Magnoliophyta; eudicotyledons; Gunneridae; Pentapetalae; rosids; malvids; Brassicales; Brassicaceae; Camelineae; Arabidopsis	ALA9_ARATH	1779	E:0	RecName: Full=Putative phospholipid-transporting ATPase 9 {ECO:0000303|PubMed:11402198};^Eukaryota; Viridiplantae; Streptophyta; Embryophyta; Tracheophyta; Spermatophyta; Magnoliophyta; eudicotyledons; Gunneridae; Pentapetalae; rosids; malvids; Brassicales; Brassicaceae; Camelineae; Arabidopsis	PF16209.4	PhoLip_ATPase_N	Phospholipid-translocating ATPase N-terminal	ENOG410XPYK	Phospholipid-transporting atpase	.	ExpAA=208.55^PredHel=10^Topology=i83-100o105-124i303-325o359-381i919-936o951-971i1004-1026o1041-1063i1070-1092o1107-1129i	.	GO:0048194|Golgi vesicle budding	GO:0005524|ATP binding;GO:0000287|magnesium ion binding;GO:0004012|phospholipid-translocating ATPase activity	GO:0000139|Golgi membrane;GO:0016021|integral component of membrane;GO:0005886|plasma membrane;GO:0005802|trans-Golgi network	K01530|E3.6.3.1; phospholipid-translocating ATPase [EC:3.6.3.1]	map04742|Taste transduction;map00230|Purine metabolism
f3p60_2016_21982	gi|743935760|ref|XM_011013957.1|	3376	E:0	PREDICTED: Populus euphratica probable galacturonosyltransferase 9 (LOC105116548), mRNA	gi|566166015|ref|XP_006384242.1|	1028	E:0	hypothetical protein POPTR_0004s10980g [Populus trichocarpa]	GAUT9_ARATH	845	E:0	RecName: Full=Probable galacturonosyltransferase 9;^Eukaryota; Viridiplantae; Streptophyta; Embryophyta; Tracheophyta; Spermatophyta; Magnoliophyta; eudicotyledons; Gunneridae; Pentapetalae; rosids; malvids; Brassicales; Brassicaceae; Camelineae; Arabidopsis	GAUT9_ARATH	884	E:0	RecName: Full=Probable galacturonosyltransferase 9;^Eukaryota; Viridiplantae; Streptophyta; Embryophyta; Tracheophyta; Spermatophyta; Magnoliophyta; eudicotyledons; Gunneridae; Pentapetalae; rosids; malvids; Brassicales; Brassicaceae; Camelineae; Arabidopsis	PF01501.19	Glyco_transf_8	Glycosyl transferase family 8	ENOG411141T	Galacturonosyltransferase	.	ExpAA=22.10^PredHel=1^Topology=i23-45o	.	GO:0045489|pectin biosynthetic process	GO:0047262|polygalacturonate 4-alpha-galacturonosyltransferase activityGO:0016757|transferase activity, transferring glycosyl groups	GO:0005768|endosome;GO:0005794|Golgi apparatus;GO:0000139|Golgi membrane;GO:0016021|integral component of membrane;GO:0005802|trans-Golgi network	K13648|GAUT; alpha-1,4-galacturonosyltransferase [EC:2.4.1.43]	map00500|Starch and sucrose metabolism;map00520|Amino sugar and nucleotide sugar metabolism
f2p60_890_31376	gi|118488413|gb|EF148032.1|	1459	E:0	Populus trichocarpa clone WS0126_P01 unknown mRNA	gi|224057968|ref|XP_002299414.1|	360	E:9e-123	photosystem I chain III family protein [Populus trichocarpa]	PSAF_ARATH	299	E:5e-100	RecName: Full=Photosystem I reaction center subunit III, chloroplastic;^Eukaryota; Viridiplantae; Streptophyta; Embryophyta; Tracheophyta; Spermatophyta; Magnoliophyta; eudicotyledons; Gunneridae; Pentapetalae; rosids; malvids; Brassicales; Brassicaceae; Camelineae; Arabidopsis	PSAF_ARATH	337	E:2e-116	RecName: Full=Photosystem I reaction center subunit III, chloroplastic;^Eukaryota; Viridiplantae; Streptophyta; Embryophyta; Tracheophyta; Spermatophyta; Magnoliophyta; eudicotyledons; Gunneridae; Pentapetalae; rosids; malvids; Brassicales; Brassicaceae; Camelineae; Arabidopsis	PF02507.14	PSI_PsaF	Photosystem I reaction centre subunit III	ENOG4111JQH	photosystem i	.	ExpAA=44.22^PredHel=2^Topology=o133-155i168-190o	.	GO:0015979|photosynthesisGO:0015979|photosynthesis	GO:0019904|protein domain specific binding	GO:0009507|chloroplast;GO:0009941|chloroplast envelope;GO:0009534|chloroplast thylakoid;GO:0009535|chloroplast thylakoid membrane;GO:0016021|integral component of membrane;GO:0016020|membrane;GO:0009538|photosystem I reaction center;GO:0010287|plastoglobule;GO:0009579|thylakoidGO:0009522|photosystem I;GO:0009538|photosystem I reaction center	K02694|psaF; photosystem I subunit III	map01100|Metabolic pathways;map00195|Photosynthesis
f5p60_1200_9306	gi|591403377|gb|KJ201822.1|	1851	E:0	Populus trichocarpa class III peroxidase (PRX57) mRNA, complete cds	gi|591403378|gb|AHL39161.1|	668	E:0	class III peroxidase [Populus trichocarpa]	PER10_ARATH	430	E:1e-147	RecName: Full=Peroxidase 10;^Eukaryota; Viridiplantae; Streptophyta; Embryophyta; Tracheophyta; Spermatophyta; Magnoliophyta; eudicotyledons; Gunneridae; Pentapetalae; rosids; malvids; Brassicales; Brassicaceae; Camelineae; Arabidopsis	PER10_ARATH	441	E:8e-153	RecName: Full=Peroxidase 10;^Eukaryota; Viridiplantae; Streptophyta; Embryophyta; Tracheophyta; Spermatophyta; Magnoliophyta; eudicotyledons; Gunneridae; Pentapetalae; rosids; malvids; Brassicales; Brassicaceae; Camelineae; Arabidopsis	PF00141.22	peroxidase	Peroxidase	ENOG41118P7	peroxidase	.	ExpAA=21.40^PredHel=1^Topology=i20-42o	.	GO:0042744|hydrogen peroxide catabolic process;GO:0006979|response to oxidative stressGO:0006979|response to oxidative stress;GO:0055114|oxidation-reduction process	GO:0020037|heme binding;GO:0046872|metal ion binding;GO:0004601|peroxidase activityGO:0004601|peroxidase activity;GO:0020037|heme binding	GO:0005576|extracellular region	K00430|E1.11.1.7; peroxidase [EC:1.11.1.7]	map01100|Metabolic pathways;map00940|Phenylpropanoid biosynthesis;map01110|Biosynthesis of secondary metabolites
f2p15_2059_4284	gi|743881711|ref|XM_011038243.1|	3284	E:0	PREDICTED: Populus euphratica alanine aminotransferase 2-like (LOC105134013), mRNA	gi|566161304|ref|XP_002304255.2|	945	E:0	hypothetical protein POPTR_0003s07020g [Populus trichocarpa]	ALAT2_ARATH	833	E:0	RecName: Full=Alanine aminotransferase 2, mitochondrial;^Eukaryota; Viridiplantae; Streptophyta; Embryophyta; Tracheophyta; Spermatophyta; Magnoliophyta; eudicotyledons; Gunneridae; Pentapetalae; rosids; malvids; Brassicales; Brassicaceae; Camelineae; Arabidopsis	ALAT2_ARATH	883	E:0	RecName: Full=Alanine aminotransferase 2, mitochondrial;^Eukaryota; Viridiplantae; Streptophyta; Embryophyta; Tracheophyta; Spermatophyta; Magnoliophyta; eudicotyledons; Gunneridae; Pentapetalae; rosids; malvids; Brassicales; Brassicaceae; Camelineae; Arabidopsis	PF00155.20	Aminotran_1_2	Aminotransferase class I and II	COG0436	aminotransferase	.	ExpAA=22.95^PredHel=1^Topology=i24-46o	.	GO:0009058|biosynthetic process;GO:0042853|L-alanine catabolic process;GO:0001666|response to hypoxiaGO:0009058|biosynthetic process	GO:0004021|L-alanine:2-oxoglutarate aminotransferase activity;GO:0030170|pyridoxal phosphate bindingGO:0030170|pyridoxal phosphate binding	GO:0005739|mitochondrion	K00814|GPT, ALT; alanine transaminase [EC:2.6.1.2]	map01200|Carbon metabolism;map00220|Arginine biosynthesis;map01210|2-Oxocarboxylic acid metabolism;map01230|Biosynthesis of amino acids;map00250|Alanine, aspartate and glutamate metabolism;map00710|Carbon fixation in photosynthetic organisms;map01100|Metabolic pathways;map01120|Microbial metabolism in diverse environments
f2p52_3465_960	gi|566199353|ref|XM_002319058.2|	5943	E:0	Populus trichocarpa putative ethylene receptor family protein (POPTR_0013s04140g) mRNA, complete cds	gi|224123504|ref|XP_002319094.1|	1479	E:0	putative ethylene receptor family protein [Populus trichocarpa]	EIN4_ARATH	955	E:0	RecName: Full=Protein EIN4;^Eukaryota; Viridiplantae; Streptophyta; Embryophyta; Tracheophyta; Spermatophyta; Magnoliophyta; eudicotyledons; Gunneridae; Pentapetalae; rosids; malvids; Brassicales; Brassicaceae; Camelineae; Arabidopsis	EIN4_ARATH	993	E:0	RecName: Full=Protein EIN4;^Eukaryota; Viridiplantae; Streptophyta; Embryophyta; Tracheophyta; Spermatophyta; Magnoliophyta; eudicotyledons; Gunneridae; Pentapetalae; rosids; malvids; Brassicales; Brassicaceae; Camelineae; Arabidopsis	PF01590.25	GAF	GAF domain	ENOG410ZMP5	HisKA	.	ExpAA=93.37^PredHel=4^Topology=o4-21i51-68o78-100i112-134o	.	GO:0010105|negative regulation of ethylene-activated signaling pathwayGO:0007165|signal transduction;GO:0000160|phosphorelay signal transduction system	GO:0005524|ATP binding;GO:0051740|ethylene binding;GO:0038199|ethylene receptor activity;GO:0046872|metal ion binding;GO:0000155|phosphorelay sensor kinase activity;GO:0004674|protein serine/threonine kinase activity;GO:0004872|receptor activityGO:0005515|protein binding;GO:0000155|phosphorelay sensor kinase activity	GO:0005783|endoplasmic reticulum;GO:0005789|endoplasmic reticulum membrane;GO:0016021|integral component of membrane	K14509|ETR, ERS; ethylene receptor [EC:2.7.13.-]	map04075|Plant hormone signal transduction
f3p60_1508_25117	gi|566191969|ref|XM_002315188.2|	2527	E:0	Populus trichocarpa glycosyl transferase family 2 family protein (POPTR_0010s21150g) mRNA, complete cds	gi|224109522|ref|XP_002315224.1|	634	E:0	glycosyl transferase family 2 family protein [Populus trichocarpa]	ALG5_HUMAN	254	E:4e-78	RecName: Full=Dolichyl-phosphate beta-glucosyltransferase;^Eukaryota; Metazoa; Chordata; Craniata; Vertebrata; Euteleostomi; Mammalia; Eutheria; Euarchontoglires; Primates; Haplorrhini; Catarrhini; Hominidae; Homo	ALG5_DROME	257	E:1e-81	RecName: Full=Dolichyl-phosphate beta-glucosyltransferase {ECO:0000250|UniProtKB:Q9Y673};^Eukaryota; Metazoa; Ecdysozoa; Arthropoda; Hexapoda; Insecta; Pterygota; Neoptera; Holometabola; Diptera; Brachycera; Muscomorpha; Ephydroidea; Drosophilidae; Drosophila; Sophophora	PF00535.25	Glycos_transf_2	Glycosyl transferase family 2	COG0463	Glycosyl transferase, family 2	.	ExpAA=37.38^PredHel=1^Topology=o5-27i	.	GO:0040003|chitin-based cuticle development;GO:0009953|dorsal/ventral pattern formation;GO:0009880|embryonic pattern specification;GO:0007029|endoplasmic reticulum organization;GO:0010004|gastrulation involving germ band extension;GO:0007030|Golgi organization;GO:0007509|mesoderm migration involved in gastrulation;GO:0007009|plasma membrane organization;GO:0006487|protein N-linked glycosylation;G…	GO:0004581|dolichyl-phosphate beta-glucosyltransferase activity;GO:0016740|transferase activity	GO:0005783|endoplasmic reticulum;GO:0005789|endoplasmic reticulum membrane;GO:0016021|integral component of membrane	K00729|ALG5; dolichyl-phosphate beta-glucosyltransferase [EC:2.4.1.117]	map01100|Metabolic pathways;map00510|N-Glycan biosynthesis
f2p60_1156_10008	gi|566187757|ref|XM_002312948.2|	1993	E:0	Populus trichocarpa ER lumen protein retaining receptor (POPTR_0009s13150g) mRNA, complete cds	gi|224103251|ref|XP_002312984.1|	531	E:0	ER lumen protein retaining receptor [Populus trichocarpa]	ERD2_DICDI	105	E:5e-25	RecName: Full=ER lumen protein-retaining receptor;^Eukaryota; Amoebozoa; Mycetozoa; Dictyosteliida; Dictyostelium	ERD22_CAEEL	113	E:2e-28	RecName: Full=Putative ER lumen protein-retaining receptor C28H8.4;^Eukaryota; Metazoa; Ecdysozoa; Nematoda; Chromadorea; Rhabditida; Rhabditoidea; Rhabditidae; Peloderinae; Caenorhabditis	PF00810.17	ER_lumen_recept	ER lumen protein retaining receptor	COG5196	Required for the retention of luminal endoplasmic reticulum proteins. Determines the specificity of the luminal ER protein retention system. Also required for normal vesicular traffic through the Golgi (By similarity)	.	ExpAA=127.09^PredHel=6^Topology=i21-43o102-124i136-154o164-181i193-215o225-247i	.	GO:0006621|protein retention in ER lumen;GO:0015031|protein transport;GO:0016192|vesicle-mediated transportGO:0006621|protein retention in ER lumen	GO:0046923|ER retention sequence bindingGO:0046923|ER retention sequence binding	GO:0005789|endoplasmic reticulum membrane;GO:0016021|integral component of membraneGO:0016021|integral component of membrane	K10949|KDELR; ER lumen protein retaining receptor	map05110|Vibrio cholerae infection
f2p60_593_15338	gi|566185798|ref|XM_006378897.1|	970	E:0	Populus trichocarpa hypothetical protein (POPTR_0009s01720g) mRNA, complete cds	gi|743902104|ref|XP_011044382.1|	99.8	E:7e-24	PREDICTED: protein transport protein Sec61 subunit beta [Populus euphratica]	SC61B_ARATH	66.2	E:5e-13	RecName: Full=Protein transport protein Sec61 subunit beta;^Eukaryota; Viridiplantae; Streptophyta; Embryophyta; Tracheophyta; Spermatophyta; Magnoliophyta; eudicotyledons; Gunneridae; Pentapetalae; rosids; malvids; Brassicales; Brassicaceae; Camelineae; Arabidopsis	SC61B_ARATH	78.2	E:2e-18	RecName: Full=Protein transport protein Sec61 subunit beta;^Eukaryota; Viridiplantae; Streptophyta; Embryophyta; Tracheophyta; Spermatophyta; Magnoliophyta; eudicotyledons; Gunneridae; Pentapetalae; rosids; malvids; Brassicales; Brassicaceae; Camelineae; Arabidopsis	PF03911.15	Sec61_beta	Sec61beta family	ENOG4111UAR	protein transport protein SEC61 subunit	.	ExpAA=35.89^PredHel=2^Topology=i43-62o77-99i	.	GO:0031204|posttranslational protein targeting to membrane, translocation;GO:0006616|SRP-dependent cotranslational protein targeting to membrane, translocation	GO:0005086|ARF guanyl-nucleotide exchange factor activity	GO:0031205|endoplasmic reticulum Sec complex;GO:0016021|integral component of membrane;GO:0005784|Sec61 translocon complex	K09481|SEC61B, SBH2; protein transport protein SEC61 subunit beta	map04141|Protein processing in endoplasmic reticulum;map05110|Vibrio cholerae infection;map04145|Phagosome;map03060|Protein export
f2p60_1562_6651	gi|566183327|ref|XM_002311358.2|	2719	E:0	Populus trichocarpa hypothetical protein (POPTR_0008s10730g) mRNA, complete cds	gi|566183328|ref|XP_002311394.2|	689	E:0	hypothetical protein POPTR_0008s10730g [Populus trichocarpa]	CMTA5_ARATH	471	E:3e-154	RecName: Full=Calmodulin-binding transcription activator 5;^Eukaryota; Viridiplantae; Streptophyta; Embryophyta; Tracheophyta; Spermatophyta; Magnoliophyta; eudicotyledons; Gunneridae; Pentapetalae; rosids; malvids; Brassicales; Brassicaceae; Camelineae; Arabidopsis	CMTA5_ARATH	503	E:3e-169	RecName: Full=Calmodulin-binding transcription activator 5;^Eukaryota; Viridiplantae; Streptophyta; Embryophyta; Tracheophyta; Spermatophyta; Magnoliophyta; eudicotyledons; Gunneridae; Pentapetalae; rosids; malvids; Brassicales; Brassicaceae; Camelineae; Arabidopsis	PF12796.6	Ank_2	Ankyrin repeats (3 copies)	ENOG410XS5M	Transcription activator	.	ExpAA=21.28^PredHel=1^Topology=i73-95o	.	GO:0045944|positive regulation of transcription from RNA polymerase II promoter;GO:0006355|regulation of transcription, DNA-templated	GO:0005516|calmodulin binding;GO:0043565|sequence-specific DNA binding;GO:0001077|transcriptional activator activity, RNA polymerase II core promoter proximal region sequence-specific bindingGO:0005515|protein binding	GO:0005634|nucleus	K03012|RPB4, POLR2D; DNA-directed RNA polymerase II subunit RPB4;K15272|SLC35A1_2_3; solute carrier family 35 (UDP-sugar transporter), member A1/2/3	map03020|RNA polymerase;map00240|Pyrimidine metabolism;map05169|Epstein-Barr virus infection;map01100|Metabolic pathways;map05016|Huntington's disease;map00230|Purine metabolism
f2p47_3001_1662	gi|566192488|ref|XM_002316478.2|	5238	E:0	Populus trichocarpa CTR1-like protein kinase (POPTR_0010s24110g) mRNA, complete cds	gi|566192489|ref|XP_002316514.2|	1415	E:0	CTR1-like protein kinase [Populus trichocarpa]	CTR1_ARATH	673	E:0	RecName: Full=Serine/threonine-protein kinase CTR1 {ECO:0000303|PubMed:8431946};^Eukaryota; Viridiplantae; Streptophyta; Embryophyta; Tracheophyta; Spermatophyta; Magnoliophyta; eudicotyledons; Gunneridae; Pentapetalae; rosids; malvids; Brassicales; Brassicaceae; Camelineae; Arabidopsis	CTR1_ARATH	707	E:0	RecName: Full=Serine/threonine-protein kinase CTR1 {ECO:0000303|PubMed:8431946};^Eukaryota; Viridiplantae; Streptophyta; Embryophyta; Tracheophyta; Spermatophyta; Magnoliophyta; eudicotyledons; Gunneridae; Pentapetalae; rosids; malvids; Brassicales; Brassicaceae; Camelineae; Arabidopsis	PF14381.5	EDR1	Ethylene-responsive protein kinase Le-CTR1	COG0515	Serine Threonine protein kinase	.	ExpAA=16.28^PredHel=1^Topology=i193-215o	.	GO:0071281|cellular response to iron ion;GO:0009873|ethylene-activated signaling pathway;GO:0009686|gibberellin biosynthetic process;GO:0010105|negative regulation of ethylene-activated signaling pathway;GO:0046777|protein autophosphorylation;GO:2000069|regulation of post-embryonic root development;GO:2000035|regulation of stem cell division;GO:0048510|regulation of timing of transition from vege…	GO:0005524|ATP binding;GO:0004674|protein serine/threonine kinase activity;GO:0004712|protein serine/threonine/tyrosine kinase activity;GO:0004871|signal transducer activityGO:0004672|protein kinase activity;GO:0005524|ATP binding	GO:0005789|endoplasmic reticulum membrane	K14510|CTR1; serine/threonine-protein kinase CTR1 [EC:2.7.11.1]	map04075|Plant hormone signal transduction
f9p60_3620_18492	gi|743844927|ref|XM_011029035.1|	5939	E:0	PREDICTED: Populus euphratica putative calcium-transporting ATPase 11, plasma membrane-type (LOC105127658), mRNA	gi|743844928|ref|XP_011027337.1|	1956	E:0	PREDICTED: putative calcium-transporting ATPase 11, plasma membrane-type [Populus euphratica]	ACA11_ARATH	1455	E:0	RecName: Full=Putative calcium-transporting ATPase 11, plasma membrane-type;^Eukaryota; Viridiplantae; Streptophyta; Embryophyta; Tracheophyta; Spermatophyta; Magnoliophyta; eudicotyledons; Gunneridae; Pentapetalae; rosids; malvids; Brassicales; Brassicaceae; Camelineae; Arabidopsis	ACA11_ARATH	1553	E:0	RecName: Full=Putative calcium-transporting ATPase 11, plasma membrane-type;^Eukaryota; Viridiplantae; Streptophyta; Embryophyta; Tracheophyta; Spermatophyta; Magnoliophyta; eudicotyledons; Gunneridae; Pentapetalae; rosids; malvids; Brassicales; Brassicaceae; Camelineae; Arabidopsis	PF12515.7	CaATP_NAI	Ca2+-ATPase N terminal autoinhibitory domain	ENOG410XNNC	ATPase, Ca transporting, plasma membrane	.	ExpAA=190.76^PredHel=8^Topology=i176-195o205-222i358-380o400-422i824-846o915-937i957-979o994-1016i	.	GO:0055081|anion homeostasis;GO:0042742|defense response to bacterium;GO:0043069|negative regulation of programmed cell death	GO:0005524|ATP binding;GO:0005388|calcium-transporting ATPase activity;GO:0005516|calmodulin binding;GO:0046872|metal ion bindingGO:0005516|calmodulin binding	GO:0009507|chloroplast;GO:0005794|Golgi apparatus;GO:0005887|integral component of plasma membrane;GO:0009705|plant-type vacuole membrane;GO:0005886|plasma membrane;GO:0005774|vacuolar membrane;GO:0005773|vacuole	K01537|E3.6.3.8; Ca2+-transporting ATPase [EC:3.6.3.8]	map04742|Taste transduction;map00230|Purine metabolism
f2p60_2740_19768	gi|566196284|ref|XM_002317724.2|	4809	E:0	Populus trichocarpa cyclic nucleotide-gated channel C family protein (POPTR_0012s01690g) mRNA, complete cds	gi|224118210|ref|XP_002317760.1|	1363	E:0	cyclic nucleotide-gated channel C family protein [Populus trichocarpa]	CNGC1_ARATH	1074	E:0	RecName: Full=Cyclic nucleotide-gated ion channel 1;^Eukaryota; Viridiplantae; Streptophyta; Embryophyta; Tracheophyta; Spermatophyta; Magnoliophyta; eudicotyledons; Gunneridae; Pentapetalae; rosids; malvids; Brassicales; Brassicaceae; Camelineae; Arabidopsis	CNGC1_ARATH	1142	E:0	RecName: Full=Cyclic nucleotide-gated ion channel 1;^Eukaryota; Viridiplantae; Streptophyta; Embryophyta; Tracheophyta; Spermatophyta; Magnoliophyta; eudicotyledons; Gunneridae; Pentapetalae; rosids; malvids; Brassicales; Brassicaceae; Camelineae; Arabidopsis	PF00520.30	Ion_trans	Ion transport protein	ENOG410XPSE	Potassium voltage-gated channel, subfamily H (Eag-related), member	.	ExpAA=111.35^PredHel=5^Topology=i93-114o140-162i179-201o251-273i371-393o	.	GO:0042391|regulation of membrane potentialGO:0006811|ion transport;GO:0055085|transmembrane transport	GO:0005516|calmodulin binding;GO:0030552|cAMP binding;GO:0030553|cGMP binding;GO:0005216|ion channel activityGO:0005216|ion channel activity	GO:0005887|integral component of plasma membrane;GO:0005886|plasma membraneGO:0016020|membrane	K05391|CNGF; cyclic nucleotide gated channel, other eukaryote	map04626|Plant-pathogen interaction
f4p60_809_12923	gi|118486125|gb|EF146863.1|	1378	E:0	Populus trichocarpa clone WS0121_D01 unknown mRNA	gi|566195980|ref|XP_006378006.1|	328	E:3e-111	Photosystem I reaction center subunit V family protein [Populus trichocarpa]	PSAG_ARATH	204	E:4e-64	RecName: Full=Photosystem I reaction center subunit V, chloroplastic;^Eukaryota; Viridiplantae; Streptophyta; Embryophyta; Tracheophyta; Spermatophyta; Magnoliophyta; eudicotyledons; Gunneridae; Pentapetalae; rosids; malvids; Brassicales; Brassicaceae; Camelineae; Arabidopsis	PSAG_ARATH	204	E:1e-65	RecName: Full=Photosystem I reaction center subunit V, chloroplastic;^Eukaryota; Viridiplantae; Streptophyta; Embryophyta; Tracheophyta; Spermatophyta; Magnoliophyta; eudicotyledons; Gunneridae; Pentapetalae; rosids; malvids; Brassicales; Brassicaceae; Camelineae; Arabidopsis	PF01241.17	PSI_PSAK	Photosystem I psaG / psaK	ENOG41120CZ	photosystem I reaction center subunit V	.	ExpAA=40.72^PredHel=2^Topology=o58-80i120-142o	.	GO:0015979|photosynthesis;GO:0009773|photosynthetic electron transport in photosystem I;GO:0009780|photosynthetic NADP+ reduction;GO:0042550|photosystem I stabilization;GO:0050821|protein stabilizationGO:0015979|photosynthesis	GO:0016168|chlorophyll binding	GO:0009507|chloroplast;GO:0009941|chloroplast envelope;GO:0031969|chloroplast membrane;GO:0030093|chloroplast photosystem I;GO:0009534|chloroplast thylakoid;GO:0009535|chloroplast thylakoid membrane;GO:0016021|integral component of membrane;GO:0009579|thylakoidGO:0009522|photosystem I;GO:0016020|membrane	K08905|psaG; photosystem I subunit V	map01100|Metabolic pathways;map00195|Photosynthesis
f2p60_963_11427	gi|566203821|ref|XM_006375377.1|	1640	E:0	Populus trichocarpa hypothetical protein (POPTR_0014s11700g) mRNA, complete cds	gi|566203822|ref|XP_006375439.1|	440	E:1e-153	hypothetical protein POPTR_0014s11700g [Populus trichocarpa]	SUD1_ARATH	60.8	E:8e-09	RecName: Full=Probable E3 ubiquitin ligase SUD1;^Eukaryota; Viridiplantae; Streptophyta; Embryophyta; Tracheophyta; Spermatophyta; Magnoliophyta; eudicotyledons; Gunneridae; Pentapetalae; rosids; malvids; Brassicales; Brassicaceae; Camelineae; Arabidopsis	SUD1_ARATH	60.8	E:2e-09	RecName: Full=Probable E3 ubiquitin ligase SUD1;^Eukaryota; Viridiplantae; Streptophyta; Embryophyta; Tracheophyta; Spermatophyta; Magnoliophyta; eudicotyledons; Gunneridae; Pentapetalae; rosids; malvids; Brassicales; Brassicaceae; Camelineae; Arabidopsis	PF12906.6	RINGv	RING-variant domain	COG5183	(Membrane-Associated Ring finger (C3HC4))	.	ExpAA=42.45^PredHel=2^Topology=i135-154o164-186i	.	GO:0042335|cuticle development;GO:0010143|cutin biosynthetic process;GO:0008299|isoprenoid biosynthetic process;GO:1900490|positive regulation of hydroxymethylglutaryl-CoA reductase (NADPH) activity;GO:0009414|response to water deprivation;GO:0010345|suberin biosynthetic process;GO:0030433|ubiquitin-dependent ERAD pathway;GO:0010025|wax biosynthetic process	GO:1904264|ubiquitin protein ligase activity involved in ERAD pathway;GO:0004842|ubiquitin-protein transferase activity;GO:0008270|zinc ion bindingGO:0008270|zinc ion binding	GO:0030176|integral component of endoplasmic reticulum membrane	K10661|MARCH6, DOA10; E3 ubiquitin-protein ligase MARCH6 [EC:2.3.2.27]	map04141|Protein processing in endoplasmic reticulum
f2p60_1669_6089	gi|566147984|ref|XM_002298027.2|	2939	E:0	Populus trichocarpa membrane bound O-acyl transferase family protein (POPTR_0001s08780g) mRNA, complete cds	gi|566147985|ref|XP_002298063.2|	947	E:0	membrane bound O-acyl transferase family protein [Populus trichocarpa]	MBOA1_ARATH	736	E:0	RecName: Full=Lysophospholipid acyltransferase 1;^Eukaryota; Viridiplantae; Streptophyta; Embryophyta; Tracheophyta; Spermatophyta; Magnoliophyta; eudicotyledons; Gunneridae; Pentapetalae; rosids; malvids; Brassicales; Brassicaceae; Camelineae; Arabidopsis	MBOA1_ARATH	736	E:0	RecName: Full=Lysophospholipid acyltransferase 1;^Eukaryota; Viridiplantae; Streptophyta; Embryophyta; Tracheophyta; Spermatophyta; Magnoliophyta; eudicotyledons; Gunneridae; Pentapetalae; rosids; malvids; Brassicales; Brassicaceae; Camelineae; Arabidopsis	PF03062.18	MBOAT	MBOAT, membrane-bound O-acyltransferase family	COG5202	membrane bound O-acyltransferase domain containing	.	ExpAA=214.34^PredHel=10^Topology=i32-54o69-91i104-123o138-160i181-203o232-254i287-309o383-405i417-439o449-471i	.	GO:0019375|galactolipid biosynthetic process;GO:0045017|glycerolipid biosynthetic process;GO:0008654|phospholipid biosynthetic process	GO:0047184|1-acylglycerophosphocholine O-acyltransferase activity;GO:0071617|lysophospholipid acyltransferase activity;GO:0016746|transferase activity, transferring acyl groups	GO:0005783|endoplasmic reticulum;GO:0005789|endoplasmic reticulum membrane;GO:0016021|integral component of membrane;GO:0005886|plasma membrane	K13519|LPT1, ALE1; lysophospholipid acyltransferase [EC:2.3.1.51 2.3.1.23 2.3.1.-]	map01110|Biosynthesis of secondary metabolites;map00561|Glycerolipid metabolism;map01100|Metabolic pathways;map00565|Ether lipid metabolism;map00564|Glycerophospholipid metabolism
f2p37_2396_20662	gi|566212951|ref|XM_006373283.1|	4322	E:0	Populus trichocarpa hypothetical protein (POPTR_0017s12550g) mRNA, complete cds	gi|566212952|ref|XP_006373345.1|	1334	E:0	hypothetical protein POPTR_0017s12550g [Populus trichocarpa]	CNGC2_ARATH	999	E:0	RecName: Full=Cyclic nucleotide-gated ion channel 2;^Eukaryota; Viridiplantae; Streptophyta; Embryophyta; Tracheophyta; Spermatophyta; Magnoliophyta; eudicotyledons; Gunneridae; Pentapetalae; rosids; malvids; Brassicales; Brassicaceae; Camelineae; Arabidopsis	CNGC2_ARATH	1077	E:0	RecName: Full=Cyclic nucleotide-gated ion channel 2;^Eukaryota; Viridiplantae; Streptophyta; Embryophyta; Tracheophyta; Spermatophyta; Magnoliophyta; eudicotyledons; Gunneridae; Pentapetalae; rosids; malvids; Brassicales; Brassicaceae; Camelineae; Arabidopsis	PF00520.30	Ion_trans	Ion transport protein	ENOG410XPSE	Potassium voltage-gated channel, subfamily H (Eag-related), member	.	ExpAA=139.53^PredHel=4^Topology=o269-291i298-320o402-424i445-467o	.	GO:0070509|calcium ion import;GO:0006952|defense response;GO:0007263|nitric oxide mediated signal transduction;GO:0009626|plant-type hypersensitive response;GO:0042391|regulation of membrane potentialGO:0006811|ion transport;GO:0055085|transmembrane transport	GO:0005262|calcium channel activity;GO:0005516|calmodulin binding;GO:0030552|cAMP binding;GO:0030553|cGMP binding;GO:0005222|intracellular cAMP activated cation channel activity;GO:0005221|intracellular cyclic nucleotide activated cation channel activity;GO:0005242|inward rectifier potassium channel activityGO:0005216|ion channel activity	GO:0005887|integral component of plasma membrane;GO:0005622|intracellularGO:0016020|membrane	K05391|CNGF; cyclic nucleotide gated channel, other eukaryote	map04626|Plant-pathogen interaction
f2p37_1996_4289	gi|566185748|ref|XM_002313493.2|	3077	E:0	Populus trichocarpa hypothetical protein (POPTR_0009s01410g) mRNA, complete cds	gi|566185751|ref|XP_002313528.2|	975	E:0	high-affinity nitrate transporter NRT2 family protein [Populus trichocarpa]	NRT24_ARATH	827	E:0	RecName: Full=High affinity nitrate transporter 2.4;^Eukaryota; Viridiplantae; Streptophyta; Embryophyta; Tracheophyta; Spermatophyta; Magnoliophyta; eudicotyledons; Gunneridae; Pentapetalae; rosids; malvids; Brassicales; Brassicaceae; Camelineae; Arabidopsis	NRT21_ARATH	895	E:0	RecName: Full=High-affinity nitrate transporter 2.1;^Eukaryota; Viridiplantae; Streptophyta; Embryophyta; Tracheophyta; Spermatophyta; Magnoliophyta; eudicotyledons; Gunneridae; Pentapetalae; rosids; malvids; Brassicales; Brassicaceae; Camelineae; Arabidopsis	PF07690.15	MFS_1	Major Facilitator Superfamily	COG2223	Transporter	.	ExpAA=238.39^PredHel=11^Topology=o67-89i129-151o155-177i184-206o221-243i272-294o314-331i352-371o381-403i408-430o440-462i	.	GO:0071249|cellular response to nitrate;GO:0048527|lateral root development;GO:0042128|nitrate assimilation;GO:0015706|nitrate transport;GO:0010167|response to nitrateGO:0055085|transmembrane transport	GO:0015112|nitrate transmembrane transporter activity	GO:0016021|integral component of membrane;GO:0016020|membrane;GO:0009705|plant-type vacuole membrane;GO:0005886|plasma membraneGO:0016021|integral component of membrane	K02575|NRT, narK, nrtP, nasA; MFS transporter, NNP family, nitrate/nitrite transporter	map00910|Nitrogen metabolism
f2p60_1867_22642	gi|743846916|ref|XM_011029552.1|	2983	E:0	PREDICTED: Populus euphratica allantoinase (LOC105128047), transcript variant X3, mRNA	gi|566164850|ref|XP_002305806.2|	877	E:0	hypothetical protein POPTR_0004s04190g [Populus trichocarpa]	ALN_ARATH	666	E:0	RecName: Full=Allantoinase;^Eukaryota; Viridiplantae; Streptophyta; Embryophyta; Tracheophyta; Spermatophyta; Magnoliophyta; eudicotyledons; Gunneridae; Pentapetalae; rosids; malvids; Brassicales; Brassicaceae; Camelineae; Arabidopsis	ALN_ARATH	737	E:0	RecName: Full=Allantoinase;^Eukaryota; Viridiplantae; Streptophyta; Embryophyta; Tracheophyta; Spermatophyta; Magnoliophyta; eudicotyledons; Gunneridae; Pentapetalae; rosids; malvids; Brassicales; Brassicaceae; Camelineae; Arabidopsis	PF01979.19	Amidohydro_1	Amidohydrolase family	COG0044	Dihydroorotase	.	ExpAA=19.13^PredHel=1^Topology=i13-31o	.	GO:0000256|allantoin catabolic process;GO:0006995|cellular response to nitrogen starvation;GO:0006145|purine nucleobase catabolic process;GO:0010136|ureide catabolic process	GO:0004038|allantoinase activity;GO:0050897|cobalt ion binding;GO:0008270|zinc ion bindingGO:0016787|hydrolase activity	GO:0005783|endoplasmic reticulum	K01466|allB; allantoinase [EC:3.5.2.5]	map01100|Metabolic pathways;map01120|Microbial metabolism in diverse environments;map00230|Purine metabolism
f3p45_1800_23160	gi|566152899|ref|XM_002298499.2|	3131	E:0	Populus trichocarpa monodehydroascorbate reductase family protein (POPTR_0001s35220g) mRNA, complete cds	gi|224055551|ref|XP_002298535.1|	943	E:0	monodehydroascorbate reductase family protein [Populus trichocarpa]	MDAR4_ARATH	722	E:0	RecName: Full=Monodehydroascorbate reductase 4, peroxisomal {ECO:0000303|PubMed:16146528};^Eukaryota; Viridiplantae; Streptophyta; Embryophyta; Tracheophyta; Spermatophyta; Magnoliophyta; eudicotyledons; Gunneridae; Pentapetalae; rosids; malvids; Brassicales; Brassicaceae; Camelineae; Arabidopsis	MDAR4_ARATH	736	E:0	RecName: Full=Monodehydroascorbate reductase 4, peroxisomal {ECO:0000303|PubMed:16146528};^Eukaryota; Viridiplantae; Streptophyta; Embryophyta; Tracheophyta; Spermatophyta; Magnoliophyta; eudicotyledons; Gunneridae; Pentapetalae; rosids; malvids; Brassicales; Brassicaceae; Camelineae; Arabidopsis	PF07992.13	Pyr_redox_2	Pyridine nucleotide-disulphide oxidoreductase	COG0446	pyridine nucleotide-disulfide oxidoreductase	.	ExpAA=35.81^PredHel=1^Topology=o449-471i	.	GO:0042744|hydrogen peroxide catabolic processGO:0055114|oxidation-reduction process	GO:0050660|flavin adenine dinucleotide binding;GO:0016656|monodehydroascorbate reductase (NADH) activityGO:0016491|oxidoreductase activity	GO:0009941|chloroplast envelope;GO:0016021|integral component of membrane;GO:0005778|peroxisomal membrane	K08232|E1.6.5.4; monodehydroascorbate reductase (NADH) [EC:1.6.5.4]	map01100|Metabolic pathways;map00053|Ascorbate and aldarate metabolism
f3p60_2117_21652	gi|743869914|ref|XM_011035118.1|	3282	E:0	PREDICTED: Populus euphratica omega-6 fatty acid desaturase, chloroplastic (LOC105131919), transcript variant X1, mRNA	gi|566177172|ref|XP_002308396.2|	887	E:0	hypothetical protein POPTR_0006s19920g [Populus trichocarpa]	FAD6C_BRANA	692	E:0	RecName: Full=Omega-6 fatty acid desaturase, chloroplastic {ECO:0000303|PubMed:8066133};^Eukaryota; Viridiplantae; Streptophyta; Embryophyta; Tracheophyta; Spermatophyta; Magnoliophyta; eudicotyledons; Gunneridae; Pentapetalae; rosids; malvids; Brassicales; Brassicaceae; Brassiceae; Brassica	FAD6C_ARATH	719	E:0	RecName: Full=Omega-6 fatty acid desaturase, chloroplastic {ECO:0000303|PubMed:7846158};^Eukaryota; Viridiplantae; Streptophyta; Embryophyta; Tracheophyta; Spermatophyta; Magnoliophyta; eudicotyledons; Gunneridae; Pentapetalae; rosids; malvids; Brassicales; Brassicaceae; Camelineae; Arabidopsis	PF00487.23	FA_desaturase	Fatty acid desaturase	COG3239	linoleoyl-CoA desaturase activity	.	ExpAA=80.45^PredHel=3^Topology=i123-142o146-168i274-296o	.	GO:0006633|fatty acid biosynthetic process;GO:0010205|photoinhibition;GO:0006636|unsaturated fatty acid biosynthetic processGO:0006629|lipid metabolic process	GO:0016491|oxidoreductase activity;GO:0019904|protein domain specific binding	GO:0009507|chloroplast;GO:0009941|chloroplast envelope;GO:0009706|chloroplast inner membrane;GO:0016021|integral component of membrane	K10255|FAD6, desA; omega-6 fatty acid desaturase (delta-12 desaturase) [EC:1.14.19.-]	map02020|Two-component system;map01212|Fatty acid metabolism;map01040|Biosynthesis of unsaturated fatty acids
f3p60_1219_27738	gi|566151619|ref|XM_002300278.2|	2060	E:0	Populus trichocarpa hypothetical protein (POPTR_0001s29170g) mRNA, complete cds	gi|566151620|ref|XP_002300314.2|	486	E:2e-169	hypothetical protein POPTR_0001s29170g [Populus trichocarpa]	HSP7M_SOLTU	141	E:3e-35	RecName: Full=Heat shock 70 kDa protein, mitochondrial;^Eukaryota; Viridiplantae; Streptophyta; Embryophyta; Tracheophyta; Spermatophyta; Magnoliophyta; eudicotyledons; Gunneridae; Pentapetalae; asterids; lamiids; Solanales; Solanaceae; Solanoideae; Solaneae; Solanum	HSP7M_SOLTU	141	E:2e-36	RecName: Full=Heat shock 70 kDa protein, mitochondrial;^Eukaryota; Viridiplantae; Streptophyta; Embryophyta; Tracheophyta; Spermatophyta; Magnoliophyta; eudicotyledons; Gunneridae; Pentapetalae; asterids; lamiids; Solanales; Solanaceae; Solanoideae; Solaneae; Solanum	PF00012.19	HSP70	Hsp70 protein	COG0443	Heat shock protein	.	ExpAA=44.49^PredHel=2^Topology=o220-242i249-271o	.	GO:0006457|protein folding	GO:0005524|ATP binding;GO:0051082|unfolded protein bindingGO:0016627|oxidoreductase activity, acting on the CH-CH group of donors	GO:0005739|mitochondrion	K03283|HSPA1_8; heat shock 70kDa protein 1/8	map04915|Estrogen signaling pathway;map04141|Protein processing in endoplasmic reticulum;map04144|Endocytosis;map03040|Spliceosome;map04010|MAPK signaling pathway;map05134|Legionellosis;map05164|Influenza A;map05162|Measles;map05145|Toxoplasmosis;map04612|Antigen processing and presentation;map05169|Epstein-Barr virus infection
f5p60_1978_22133	gi|566206653|ref|XM_006374456.1|	3193	E:0	Populus trichocarpa hypothetical protein (POPTR_0015s08730g) mRNA, complete cds	gi|566206654|ref|XP_006374518.1|	869	E:0	hypothetical protein POPTR_0015s08730g [Populus trichocarpa]	PEX14_ARATH	313	E:1e-96	RecName: Full=Peroxisomal membrane protein PEX14;^Eukaryota; Viridiplantae; Streptophyta; Embryophyta; Tracheophyta; Spermatophyta; Magnoliophyta; eudicotyledons; Gunneridae; Pentapetalae; rosids; malvids; Brassicales; Brassicaceae; Camelineae; Arabidopsis	PEX14_ARATH	416	E:6e-138	RecName: Full=Peroxisomal membrane protein PEX14;^Eukaryota; Viridiplantae; Streptophyta; Embryophyta; Tracheophyta; Spermatophyta; Magnoliophyta; eudicotyledons; Gunneridae; Pentapetalae; rosids; malvids; Brassicales; Brassicaceae; Camelineae; Arabidopsis	PF04695.12	Pex14_N	Peroxisomal membrane anchor protein (Pex14p) conserved region	ENOG4111P8A	peroxisomal biogenesis factor 14	.	ExpAA=17.98^PredHel=1^Topology=i151-173o	.	GO:0007031|peroxisome organization;GO:0016560|protein import into peroxisome matrix, docking;GO:0006625|protein targeting to peroxisome	GO:0008565|protein transporter activity;GO:0005102|receptor binding	GO:0005829|cytosol;GO:0016021|integral component of membrane;GO:0005739|mitochondrion;GO:1990429|peroxisomal importomer complex;GO:0005778|peroxisomal membrane;GO:0005777|peroxisome;GO:0005886|plasma membrane	K13343|PEX14; peroxin-14	map04146|Peroxisome
f2p59_2668_2340	gi|743808660|ref|XM_011020017.1|	4314	E:0	PREDICTED: Populus euphratica E3 ubiquitin protein ligase RIN2 (LOC105121399), mRNA	gi|566146397|ref|XP_002299120.2|	1100	E:0	zinc finger family protein [Populus trichocarpa]	RIN2_ARATH	826	E:0	RecName: Full=E3 ubiquitin protein ligase RIN2;^Eukaryota; Viridiplantae; Streptophyta; Embryophyta; Tracheophyta; Spermatophyta; Magnoliophyta; eudicotyledons; Gunneridae; Pentapetalae; rosids; malvids; Brassicales; Brassicaceae; Camelineae; Arabidopsis	RIN2_ARATH	873	E:0	RecName: Full=E3 ubiquitin protein ligase RIN2;^Eukaryota; Viridiplantae; Streptophyta; Embryophyta; Tracheophyta; Spermatophyta; Magnoliophyta; eudicotyledons; Gunneridae; Pentapetalae; rosids; malvids; Brassicales; Brassicaceae; Camelineae; Arabidopsis	PF13639.5	zf-RING_2	Ring finger domain	COG5243	zinc ion binding	.	ExpAA=137.79^PredHel=6^Topology=i2-24o53-75i109-131o162-184i191-213o273-295i	.	GO:0009626|plant-type hypersensitive response;GO:0034052|positive regulation of plant-type hypersensitive response;GO:0043161|proteasome-mediated ubiquitin-dependent protein catabolic process;GO:0000209|protein polyubiquitination;GO:0042787|protein ubiquitination involved in ubiquitin-dependent protein catabolic process	GO:0046872|metal ion binding;GO:0061630|ubiquitin protein ligase activity;GO:0004842|ubiquitin-protein transferase activityGO:0046872|metal ion binding;GO:0005515|protein binding	GO:0016021|integral component of membrane;GO:0005886|plasma membrane	K10636|AMFR, GP78; autocrine motility factor receptor [EC:2.3.2.27]	map04141|Protein processing in endoplasmic reticulum
f10p60_2124_21569	gi|566170903|ref|XM_006383079.1|	3712	E:0	Populus trichocarpa cytochrome P450 family protein (POPTR_0005s11950g) mRNA, complete cds	gi|566170904|ref|XP_006383141.1|	957	E:0	cytochrome P450 family protein [Populus trichocarpa]	C84A1_ARATH	726	E:0	RecName: Full=Cytochrome P450 84A1;^Eukaryota; Viridiplantae; Streptophyta; Embryophyta; Tracheophyta; Spermatophyta; Magnoliophyta; eudicotyledons; Gunneridae; Pentapetalae; rosids; malvids; Brassicales; Brassicaceae; Camelineae; Arabidopsis	C84A1_ARATH	778	E:0	RecName: Full=Cytochrome P450 84A1;^Eukaryota; Viridiplantae; Streptophyta; Embryophyta; Tracheophyta; Spermatophyta; Magnoliophyta; eudicotyledons; Gunneridae; Pentapetalae; rosids; malvids; Brassicales; Brassicaceae; Camelineae; Arabidopsis	PF00067.21	p450	Cytochrome P450	COG2124	Cytochrome p450	.	ExpAA=24.12^PredHel=1^Topology=i7-29o	.	GO:0009809|lignin biosynthetic process;GO:0009699|phenylpropanoid biosynthetic process;GO:0010224|response to UV-BGO:0055114|oxidation-reduction process	GO:0020037|heme binding;GO:0005506|iron ion binding;GO:0004497|monooxygenase activity;GO:0016709|oxidoreductase activity, acting on paired donors, with incorporation or reduction of molecular oxygen, NAD(P)H as one donor, and incorporation of one atom of oxygenGO:0005506|iron ion binding;GO:0016705|oxidoreductase activity, acting on paired donors, with incorporation or reduction of molecular oxyg…	GO:0005783|endoplasmic reticulum;GO:0016021|integral component of membrane;GO:0016020|membrane	K09755|CYP84A, F5H; ferulate-5-hydroxylase [EC:1.14.-.-]	map01100|Metabolic pathways;map00940|Phenylpropanoid biosynthesis;map01110|Biosynthesis of secondary metabolites
f2p60_1223_9181	gi|566166642|ref|XM_006384388.1|	2146	E:0	Populus trichocarpa hypothetical protein (POPTR_0004s15200g) mRNA, complete cds	gi|566166643|ref|XP_006384450.1|	600	E:0	hypothetical protein POPTR_0004s15200g [Populus trichocarpa]	PER10_ARATH	402	E:7e-137	RecName: Full=Peroxidase 10;^Eukaryota; Viridiplantae; Streptophyta; Embryophyta; Tracheophyta; Spermatophyta; Magnoliophyta; eudicotyledons; Gunneridae; Pentapetalae; rosids; malvids; Brassicales; Brassicaceae; Camelineae; Arabidopsis	PER10_ARATH	451	E:1e-156	RecName: Full=Peroxidase 10;^Eukaryota; Viridiplantae; Streptophyta; Embryophyta; Tracheophyta; Spermatophyta; Magnoliophyta; eudicotyledons; Gunneridae; Pentapetalae; rosids; malvids; Brassicales; Brassicaceae; Camelineae; Arabidopsis	PF00141.22	peroxidase	Peroxidase	ENOG41118P7	peroxidase	.	ExpAA=21.25^PredHel=1^Topology=i20-42o	.	GO:0042744|hydrogen peroxide catabolic process;GO:0006979|response to oxidative stressGO:0006979|response to oxidative stress;GO:0055114|oxidation-reduction process	GO:0020037|heme binding;GO:0046872|metal ion binding;GO:0004601|peroxidase activityGO:0004601|peroxidase activity;GO:0020037|heme binding	GO:0005576|extracellular region	K00430|E1.11.1.7; peroxidase [EC:1.11.1.7]	map01100|Metabolic pathways;map00940|Phenylpropanoid biosynthesis;map01110|Biosynthesis of secondary metabolites
f2p60_568_15367	gi|566178357|ref|XM_002309590.2|	933	E:0	Populus trichocarpa Photosystem I reaction center subunit psaK family protein (POPTR_0006s27030g) mRNA, complete cds	gi|224092476|ref|XP_002309626.1|	202	E:1e-63	Photosystem I reaction center subunit psaK family protein [Populus trichocarpa]	PSAK_ARATH	175	E:2e-54	RecName: Full=Photosystem I reaction center subunit psaK, chloroplastic;^Eukaryota; Viridiplantae; Streptophyta; Embryophyta; Tracheophyta; Spermatophyta; Magnoliophyta; eudicotyledons; Gunneridae; Pentapetalae; rosids; malvids; Brassicales; Brassicaceae; Camelineae; Arabidopsis	PSAK_ARATH	210	E:4e-69	RecName: Full=Photosystem I reaction center subunit psaK, chloroplastic;^Eukaryota; Viridiplantae; Streptophyta; Embryophyta; Tracheophyta; Spermatophyta; Magnoliophyta; eudicotyledons; Gunneridae; Pentapetalae; rosids; malvids; Brassicales; Brassicaceae; Camelineae; Arabidopsis	PF01241.17	PSI_PSAK	Photosystem I psaG / psaK	ENOG4111RY5	Photosystem I reaction center subunit	.	ExpAA=39.75^PredHel=2^Topology=i48-70o102-124i	.	GO:0015979|photosynthesisGO:0015979|photosynthesis	GO:0016168|chlorophyll binding	GO:0009507|chloroplast;GO:0009534|chloroplast thylakoid;GO:0009535|chloroplast thylakoid membrane;GO:0016021|integral component of membrane;GO:0009522|photosystem I;GO:0009579|thylakoidGO:0009522|photosystem I;GO:0016020|membrane	K02698|psaK; photosystem I subunit X	map01100|Metabolic pathways;map00195|Photosynthesis
f2p44_2371_20715	gi|566191622|ref|XM_002315105.2|	822	E:0	Populus trichocarpa hypothetical protein (POPTR_0010s19230g) mRNA, complete cds	gi|566191623|ref|XP_002315141.2|	280	E:4e-83	hypothetical protein POPTR_0010s19230g [Populus trichocarpa]	IF2AH_ARATH	228	E:1e-65	RecName: Full=Eukaryotic translation initiation factor 2 subunit alpha homolog {ECO:0000305};^Eukaryota; Viridiplantae; Streptophyta; Embryophyta; Tracheophyta; Spermatophyta; Magnoliophyta; eudicotyledons; Gunneridae; Pentapetalae; rosids; malvids; Brassicales; Brassicaceae; Camelineae; Arabidopsis	IF2AH_ARATH	234	E:5e-75	RecName: Full=Eukaryotic translation initiation factor 2 subunit alpha homolog {ECO:0000305};^Eukaryota; Viridiplantae; Streptophyta; Embryophyta; Tracheophyta; Spermatophyta; Magnoliophyta; eudicotyledons; Gunneridae; Pentapetalae; rosids; malvids; Brassicales; Brassicaceae; Camelineae; Arabidopsis	PF00575.22	S1	S1 RNA binding domain	COG1093	translation initiation factor	.	ExpAA=21.52^PredHel=1^Topology=i147-169o	.	GO:0006413|translational initiation	GO:0003729|mRNA binding;GO:0043022|ribosome binding;GO:0003743|translation initiation factor activityGO:0003676|nucleic acid binding	GO:0005829|cytosol;GO:0033290|eukaryotic 48S preinitiation complex;GO:0005850|eukaryotic translation initiation factor 2 complex;GO:0005851|eukaryotic translation initiation factor 2B complex;GO:0043614|multi-eIF complex;GO:0005634|nucleus;GO:0005840|ribosome	K03237|EIF2S1; translation initiation factor 2 subunit 1	map04141|Protein processing in endoplasmic reticulum;map05164|Influenza A;map05160|Hepatitis C;map05162|Measles;map05168|Herpes simplex infection;map03013|RNA transport;map04932|Non-alcoholic fatty liver disease (NAFLD)
f2p56_3759_628	gi|566187282|ref|XM_002313092.2|	6698	E:0	Populus trichocarpa zinc finger family protein (POPTR_0009s10230g) mRNA, complete cds	gi|566187283|ref|XP_002313128.2|	2045	E:0	zinc finger family protein [Populus trichocarpa]	SUD1_ARATH	1607	E:0	RecName: Full=Probable E3 ubiquitin ligase SUD1;^Eukaryota; Viridiplantae; Streptophyta; Embryophyta; Tracheophyta; Spermatophyta; Magnoliophyta; eudicotyledons; Gunneridae; Pentapetalae; rosids; malvids; Brassicales; Brassicaceae; Camelineae; Arabidopsis	SUD1_ARATH	1705	E:0	RecName: Full=Probable E3 ubiquitin ligase SUD1;^Eukaryota; Viridiplantae; Streptophyta; Embryophyta; Tracheophyta; Spermatophyta; Magnoliophyta; eudicotyledons; Gunneridae; Pentapetalae; rosids; malvids; Brassicales; Brassicaceae; Camelineae; Arabidopsis	PF12906.6	RINGv	RING-variant domain	COG5183	(Membrane-Associated Ring finger (C3HC4))	.	ExpAA=326.66^PredHel=14^Topology=i179-201o225-247i378-400o493-515i558-580o606-628i663-685o733-755i827-849o872-894i922-944o954-976i1013-1035o1050-1072i	.	GO:0042335|cuticle development;GO:0010143|cutin biosynthetic process;GO:0008299|isoprenoid biosynthetic process;GO:1900490|positive regulation of hydroxymethylglutaryl-CoA reductase (NADPH) activity;GO:0009414|response to water deprivation;GO:0010345|suberin biosynthetic process;GO:0030433|ubiquitin-dependent ERAD pathway;GO:0010025|wax biosynthetic process	GO:1904264|ubiquitin protein ligase activity involved in ERAD pathway;GO:0004842|ubiquitin-protein transferase activity;GO:0008270|zinc ion bindingGO:0008270|zinc ion binding	GO:0030176|integral component of endoplasmic reticulum membrane	K10661|MARCH6, DOA10; E3 ubiquitin-protein ligase MARCH6 [EC:2.3.2.27]	map04141|Protein processing in endoplasmic reticulum
f2p40_1891_22579	gi|566202426|ref|XM_006375025.1|	3193	E:0	Populus trichocarpa hypothetical protein (POPTR_0014s04250g) mRNA, complete cds	gi|566202427|ref|XP_006375087.1|	889	E:0	hypothetical protein POPTR_0014s04250g [Populus trichocarpa]	C734A_ARATH	377	E:3e-121	RecName: Full=Cytochrome P450 734A1;^Eukaryota; Viridiplantae; Streptophyta; Embryophyta; Tracheophyta; Spermatophyta; Magnoliophyta; eudicotyledons; Gunneridae; Pentapetalae; rosids; malvids; Brassicales; Brassicaceae; Camelineae; Arabidopsis	C734A_ARATH	419	E:3e-139	RecName: Full=Cytochrome P450 734A1;^Eukaryota; Viridiplantae; Streptophyta; Embryophyta; Tracheophyta; Spermatophyta; Magnoliophyta; eudicotyledons; Gunneridae; Pentapetalae; rosids; malvids; Brassicales; Brassicaceae; Camelineae; Arabidopsis	PF00067.21	p450	Cytochrome P450	COG2124	Cytochrome p450	.	ExpAA=27.37^PredHel=1^Topology=i25-47o	.	GO:0010268|brassinosteroid homeostasis;GO:0016131|brassinosteroid metabolic process;GO:0040008|regulation of growth;GO:0009741|response to brassinosteroidGO:0055114|oxidation-reduction process	GO:0020037|heme binding;GO:0005506|iron ion binding;GO:0016705|oxidoreductase activity, acting on paired donors, with incorporation or reduction of molecular oxygen;GO:0008395|steroid hydroxylase activityGO:0005506|iron ion binding;GO:0016705|oxidoreductase activity, acting on paired donors, with incorporation or reduction of molecular oxygen;GO:0020037|heme binding	GO:0016021|integral component of membrane	K15639|CYP734A1, BAS1; PHYB activation tagged suppressor 1 [EC:1.14.-.-]	map00905|Brassinosteroid biosynthesis
f2p47_2334_20820	gi|566213626|ref|XM_002324240.2|	3976	E:0	Populus trichocarpa hypothetical protein (POPTR_0018s01300g) mRNA, complete cds	gi|224141853|ref|XP_002324276.1|	1032	E:0	hypothetical protein POPTR_0018s01300g [Populus trichocarpa]	KCS11_ARATH	869	E:0	RecName: Full=3-ketoacyl-CoA synthase 11 {ECO:0000303|PubMed:18465198};^Eukaryota; Viridiplantae; Streptophyta; Embryophyta; Tracheophyta; Spermatophyta; Magnoliophyta; eudicotyledons; Gunneridae; Pentapetalae; rosids; malvids; Brassicales; Brassicaceae; Camelineae; Arabidopsis	KCS11_ARATH	895	E:0	RecName: Full=3-ketoacyl-CoA synthase 11 {ECO:0000303|PubMed:18465198};^Eukaryota; Viridiplantae; Streptophyta; Embryophyta; Tracheophyta; Spermatophyta; Magnoliophyta; eudicotyledons; Gunneridae; Pentapetalae; rosids; malvids; Brassicales; Brassicaceae; Camelineae; Arabidopsis	PF08392.11	FAE1_CUT1_RppA	FAE1/Type III polyketide synthase-like protein	ENOG410Y5VH	3-ketoacyl-coa synthase	.	ExpAA=65.69^PredHel=2^Topology=o33-55i75-97o	.	GO:0006633|fatty acid biosynthetic process;GO:0009409|response to cold;GO:0009416|response to light stimulusGO:0006633|fatty acid biosynthetic process	GO:0102336|3-oxo-arachidoyl-CoA synthase activity;GO:0102337|3-oxo-cerotoyl-CoA synthase activity;GO:0102338|3-oxo-lignoceronyl-CoA synthase activityGO:0016747|transferase activity, transferring acyl groups other than amino-acyl groups	GO:0016021|integral component of membraneGO:0016020|membrane	K15397|KCS; 3-ketoacyl-CoA synthase [EC:2.3.1.199]	map00062|Fatty acid elongation;map01110|Biosynthesis of secondary metabolites
f6p60_2017_21873	gi|566197927|ref|XM_002318153.2|	3502	E:0	Populus trichocarpa Calnexin precursor family protein (POPTR_0012s11290g) mRNA, complete cds	gi|224119894|ref|XP_002318189.1|	859	E:0	Calnexin precursor family protein [Populus trichocarpa]	CALX_SOYBN	677	E:0	RecName: Full=Calnexin homolog;^Eukaryota; Viridiplantae; Streptophyta; Embryophyta; Tracheophyta; Spermatophyta; Magnoliophyta; eudicotyledons; Gunneridae; Pentapetalae; rosids; fabids; Fabales; Fabaceae; Papilionoideae; Phaseoleae; Glycine; Soja	CALX1_ARATH	791	E:0	RecName: Full=Calnexin homolog 1;^Eukaryota; Viridiplantae; Streptophyta; Embryophyta; Tracheophyta; Spermatophyta; Magnoliophyta; eudicotyledons; Gunneridae; Pentapetalae; rosids; malvids; Brassicales; Brassicaceae; Camelineae; Arabidopsis	PF00262.17	Calreticulin	Calreticulin family	ENOG410XP7T	Calnexin	.	ExpAA=40.81^PredHel=2^Topology=i7-26o464-486i	.	GO:0006457|protein foldingGO:0006457|protein folding	GO:0005509|calcium ion binding;GO:0030246|carbohydrate binding;GO:0051082|unfolded protein bindingGO:0005509|calcium ion binding;GO:0051082|unfolded protein binding	GO:0009507|chloroplast;GO:0005783|endoplasmic reticulum;GO:0005789|endoplasmic reticulum membrane;GO:0016021|integral component of membrane;GO:0016020|membrane;GO:0005739|mitochondrion;GO:0009505|plant-type cell wall;GO:0005886|plasma membrane;GO:0009506|plasmodesma;GO:0005774|vacuolar membrane;GO:0005773|vacuoleGO:0005783|endoplasmic reticulum	K08054|CANX; calnexin	map04141|Protein processing in endoplasmic reticulum;map05166|HTLV-I infection;map04145|Phagosome;map04918|Thyroid hormone synthesis;map04612|Antigen processing and presentation
f2p60_1894_22575	gi|566185750|ref|XM_002313492.2|	3186	E:0	Populus trichocarpa high-affinity nitrate transporter NRT2 family protein (POPTR_0009s01420g) mRNA, complete cds	gi|566185751|ref|XP_002313528.2|	1003	E:0	high-affinity nitrate transporter NRT2 family protein [Populus trichocarpa]	NRT21_ARATH	847	E:0	RecName: Full=High-affinity nitrate transporter 2.1;^Eukaryota; Viridiplantae; Streptophyta; Embryophyta; Tracheophyta; Spermatophyta; Magnoliophyta; eudicotyledons; Gunneridae; Pentapetalae; rosids; malvids; Brassicales; Brassicaceae; Camelineae; Arabidopsis	NRT21_ARATH	896	E:0	RecName: Full=High-affinity nitrate transporter 2.1;^Eukaryota; Viridiplantae; Streptophyta; Embryophyta; Tracheophyta; Spermatophyta; Magnoliophyta; eudicotyledons; Gunneridae; Pentapetalae; rosids; malvids; Brassicales; Brassicaceae; Camelineae; Arabidopsis	PF07690.15	MFS_1	Major Facilitator Superfamily	COG2223	Transporter	.	ExpAA=240.22^PredHel=11^Topology=o67-89i129-151o155-177i184-206o221-243i272-294o314-331i352-371o381-403i408-430o440-462i	.	GO:0071249|cellular response to nitrate;GO:0048527|lateral root development;GO:0042128|nitrate assimilation;GO:0015706|nitrate transport;GO:0010167|response to nitrateGO:0055085|transmembrane transport	GO:0015112|nitrate transmembrane transporter activity	GO:0016021|integral component of membrane;GO:0016020|membrane;GO:0009705|plant-type vacuole membrane;GO:0005886|plasma membraneGO:0016021|integral component of membrane	K02575|NRT, narK, nrtP, nasA; MFS transporter, NNP family, nitrate/nitrite transporter	map00910|Nitrogen metabolism
f2p60_961_30461	gi|224129341|ref|XM_002320526.1|	1701	E:0	Populus trichocarpa Photosystem I reaction center subunit XI family protein (POPTR_0014s17400g) mRNA, complete cds	gi|224129342|ref|XP_002320562.1|	359	E:6e-122	Photosystem I reaction center subunit XI family protein [Populus trichocarpa]	PSAL_ARATH	300	E:8e-100	RecName: Full=Photosystem I reaction center subunit XI, chloroplastic;^Eukaryota; Viridiplantae; Streptophyta; Embryophyta; Tracheophyta; Spermatophyta; Magnoliophyta; eudicotyledons; Gunneridae; Pentapetalae; rosids; malvids; Brassicales; Brassicaceae; Camelineae; Arabidopsis	PSAL_ARATH	310	E:1e-105	RecName: Full=Photosystem I reaction center subunit XI, chloroplastic;^Eukaryota; Viridiplantae; Streptophyta; Embryophyta; Tracheophyta; Spermatophyta; Magnoliophyta; eudicotyledons; Gunneridae; Pentapetalae; rosids; malvids; Brassicales; Brassicaceae; Camelineae; Arabidopsis	PF02605.14	PsaL	Photosystem I reaction centre subunit XI	ENOG4111KFU	photosystem I reaction center	.	ExpAA=50.51^PredHel=2^Topology=i131-153o187-209i	.	GO:0015979|photosynthesisGO:0015979|photosynthesis	GO:0019904|protein domain specific binding	GO:0009507|chloroplast;GO:0009941|chloroplast envelope;GO:0031969|chloroplast membrane;GO:0009534|chloroplast thylakoid;GO:0009535|chloroplast thylakoid membrane;GO:0016021|integral component of membrane;GO:0016020|membrane;GO:0009538|photosystem I reaction center;GO:0010287|plastoglobule;GO:0009579|thylakoidGO:0009522|photosystem I;GO:0009538|photosystem I reaction center	K02699|psaL; photosystem I subunit XI	map01100|Metabolic pathways;map00195|Photosynthesis
f3p60_2406_3016	gi|566205055|ref|XM_002320561.2|	4274	E:0	Populus trichocarpa hypothetical protein (POPTR_0014s18980g) mRNA, complete cds	gi|566205056|ref|XP_002320597.2|	1221	E:0	hypothetical protein POPTR_0014s18980g [Populus trichocarpa]	PIGT_HUMAN	278	E:1e-81	RecName: Full=GPI transamidase component PIG-T;^Eukaryota; Metazoa; Chordata; Craniata; Vertebrata; Euteleostomi; Mammalia; Eutheria; Euarchontoglires; Primates; Haplorrhini; Catarrhini; Hominidae; Homo	PIGT_HUMAN	281	E:5e-84	RecName: Full=GPI transamidase component PIG-T;^Eukaryota; Metazoa; Chordata; Craniata; Vertebrata; Euteleostomi; Mammalia; Eutheria; Euarchontoglires; Primates; Haplorrhini; Catarrhini; Hominidae; Homo	PF04113.13	Gpi16	Gpi16 subunit, GPI transamidase component	ENOG410XRR0	GPI transamidase component	.	ExpAA=37.83^PredHel=2^Topology=o558-580i636-654o	.	GO:0016255|attachment of GPI anchor to protein;GO:0051402|neuron apoptotic process;GO:0030182|neuron differentiationGO:0016255|attachment of GPI anchor to protein	GO:0003923|GPI-anchor transamidase activity	GO:0031410|cytoplasmic vesicle;GO:0005789|endoplasmic reticulum membrane;GO:0042765|GPI-anchor transamidase complex;GO:0030176|integral component of endoplasmic reticulum membrane;GO:0016020|membraneGO:0042765|GPI-anchor transamidase complex	K05292|PIGT; phosphatidylinositol glycan, class T	map00563|Glycosylphosphatidylinositol(GPI)-anchor biosynthesis;map01100|Metabolic pathways
f2p23_2603_2512	gi|743788941|ref|XM_011036584.1|	4226	E:0	PREDICTED: Populus euphratica polygalacturonate 4-alpha-galacturonosyltransferase-like (LOC105132853), mRNA	gi|743788942|ref|XP_011034886.1|	1252	E:0	PREDICTED: polygalacturonate 4-alpha-galacturonosyltransferase-like [Populus euphratica]	GAUT1_ARATH	1005	E:0	RecName: Full=Polygalacturonate 4-alpha-galacturonosyltransferase;^Eukaryota; Viridiplantae; Streptophyta; Embryophyta; Tracheophyta; Spermatophyta; Magnoliophyta; eudicotyledons; Gunneridae; Pentapetalae; rosids; malvids; Brassicales; Brassicaceae; Camelineae; Arabidopsis	GAUT1_ARATH	1087	E:0	RecName: Full=Polygalacturonate 4-alpha-galacturonosyltransferase;^Eukaryota; Viridiplantae; Streptophyta; Embryophyta; Tracheophyta; Spermatophyta; Magnoliophyta; eudicotyledons; Gunneridae; Pentapetalae; rosids; malvids; Brassicales; Brassicaceae; Camelineae; Arabidopsis	PF01501.19	Glyco_transf_8	Glycosyl transferase family 8	ENOG4111FC1	Alpha-1,4-galacturonosyltransferase	.	ExpAA=22.72^PredHel=1^Topology=i21-43o	.	GO:0010289|homogalacturonan biosynthetic process	GO:0047262|polygalacturonate 4-alpha-galacturonosyltransferase activityGO:0016757|transferase activity, transferring glycosyl groups	GO:0005768|endosome;GO:0005794|Golgi apparatus;GO:0000139|Golgi membrane;GO:0016021|integral component of membrane;GO:0005802|trans-Golgi network	K13648|GAUT; alpha-1,4-galacturonosyltransferase [EC:2.4.1.43]	map00500|Starch and sucrose metabolism;map00520|Amino sugar and nucleotide sugar metabolism
f2p23_4401_238	gi|566175952|ref|XM_006381345.1|	7939	E:0	Populus trichocarpa P glycoprotein1 (POPTR_0006s12590g) mRNA, complete cds	gi|566175953|ref|XP_006381407.1|	2452	E:0	P glycoprotein1 [Populus trichocarpa]	AB1B_ARATH	2123	E:0	RecName: Full=ABC transporter B family member 1;^Eukaryota; Viridiplantae; Streptophyta; Embryophyta; Tracheophyta; Spermatophyta; Magnoliophyta; eudicotyledons; Gunneridae; Pentapetalae; rosids; malvids; Brassicales; Brassicaceae; Camelineae; Arabidopsis	AB1B_ARATH	2327	E:0	RecName: Full=ABC transporter B family member 1;^Eukaryota; Viridiplantae; Streptophyta; Embryophyta; Tracheophyta; Spermatophyta; Magnoliophyta; eudicotyledons; Gunneridae; Pentapetalae; rosids; malvids; Brassicales; Brassicaceae; Camelineae; Arabidopsis	PF00664.22	ABC_membrane	ABC transporter transmembrane region	COG1132	(ABC) transporter	.	ExpAA=256.17^PredHel=12^Topology=o110-132i153-172o236-255i257-279o342-364i371-393o763-796i809-831o887-909i911-933o996-1018i1031-1053o	.	GO:0043481|anthocyanin accumulation in tissues in response to UV light;GO:0010315|auxin efflux;GO:0009926|auxin polar transport;GO:0009734|auxin-activated signaling pathway;GO:0009640|photomorphogenesis;GO:0009958|positive gravitropism;GO:0008361|regulation of cell size;GO:0009733|response to auxin;GO:0009637|response to blue light;GO:0009624|response to nematode;GO:0009639|response to red or far…	GO:0005524|ATP binding;GO:0042626|ATPase activity, coupled to transmembrane movement of substances;GO:0010329|auxin efflux transmembrane transporter activity;GO:0010328|auxin influx transmembrane transporter activityGO:0005524|ATP binding;GO:0042626|ATPase activity, coupled to transmembrane movement of substances;GO:0016887|ATPase activity	GO:0016021|integral component of membrane;GO:0005886|plasma membrane;GO:0009506|plasmodesmaGO:0016021|integral component of membrane	K05658|ABCB1; ATP-binding cassette, subfamily B (MDR/TAP), member 1 [EC:3.6.3.44]	map02010|ABC transporters;map05206|MicroRNAs in cancer;map04976|Bile secretion
f2p43_1953_4496	gi|566150971|ref|XM_002299784.2|	3413	E:0	Populus trichocarpa Cytochrome P450 86A1 family protein (POPTR_0001s25680g) mRNA, complete cds	gi|566150972|ref|XP_002299820.2|	1007	E:0	Cytochrome P450 86A1 family protein [Populus trichocarpa]	C86A1_ARATH	805	E:0	RecName: Full=Cytochrome P450 86A1;^Eukaryota; Viridiplantae; Streptophyta; Embryophyta; Tracheophyta; Spermatophyta; Magnoliophyta; eudicotyledons; Gunneridae; Pentapetalae; rosids; malvids; Brassicales; Brassicaceae; Camelineae; Arabidopsis	C86A1_ARATH	834	E:0	RecName: Full=Cytochrome P450 86A1;^Eukaryota; Viridiplantae; Streptophyta; Embryophyta; Tracheophyta; Spermatophyta; Magnoliophyta; eudicotyledons; Gunneridae; Pentapetalae; rosids; malvids; Brassicales; Brassicaceae; Camelineae; Arabidopsis	PF00067.21	p450	Cytochrome P450	COG2124	Cytochrome p450	.	ExpAA=40.46^PredHel=2^Topology=o15-37i69-91o	.	GO:0006631|fatty acid metabolic process;GO:0010345|suberin biosynthetic processGO:0055114|oxidation-reduction process	GO:0018685|alkane 1-monooxygenase activity;GO:0020037|heme binding;GO:0005506|iron ion bindingGO:0005506|iron ion binding;GO:0016705|oxidoreductase activity, acting on paired donors, with incorporation or reduction of molecular oxygen;GO:0020037|heme binding	GO:0016021|integral component of membrane;GO:0005773|vacuole	K15401|CYP86A1; fatty acid omega-hydroxylase [EC:1.14.-.-]	map00073|Cutin, suberine and wax biosynthesis
f2p60_869_318130	gi|566155398|ref|XM_002299044.2|	1339	E:0	Populus trichocarpa Photosystem I reaction center subunit V family protein (POPTR_0001s47590g) mRNA, complete cds	gi|224056901|ref|XP_002299080.1|	328	E:6e-111	Photosystem I reaction center subunit V family protein [Populus trichocarpa]	PSAG_ARATH	211	E:2e-66	RecName: Full=Photosystem I reaction center subunit V, chloroplastic;^Eukaryota; Viridiplantae; Streptophyta; Embryophyta; Tracheophyta; Spermatophyta; Magnoliophyta; eudicotyledons; Gunneridae; Pentapetalae; rosids; malvids; Brassicales; Brassicaceae; Camelineae; Arabidopsis	PSAG_ARATH	211	E:7e-68	RecName: Full=Photosystem I reaction center subunit V, chloroplastic;^Eukaryota; Viridiplantae; Streptophyta; Embryophyta; Tracheophyta; Spermatophyta; Magnoliophyta; eudicotyledons; Gunneridae; Pentapetalae; rosids; malvids; Brassicales; Brassicaceae; Camelineae; Arabidopsis	PF01241.17	PSI_PSAK	Photosystem I psaG / psaK	ENOG41120CZ	photosystem I reaction center subunit V	.	ExpAA=40.02^PredHel=2^Topology=i86-108o148-170i	.	GO:0015979|photosynthesis;GO:0009773|photosynthetic electron transport in photosystem I;GO:0009780|photosynthetic NADP+ reduction;GO:0042550|photosystem I stabilization;GO:0050821|protein stabilizationGO:0015979|photosynthesis	GO:0016168|chlorophyll binding	GO:0009507|chloroplast;GO:0009941|chloroplast envelope;GO:0031969|chloroplast membrane;GO:0030093|chloroplast photosystem I;GO:0009534|chloroplast thylakoid;GO:0009535|chloroplast thylakoid membrane;GO:0016021|integral component of membrane;GO:0009579|thylakoidGO:0009522|photosystem I;GO:0016020|membrane	K08905|psaG; photosystem I subunit V	map01100|Metabolic pathways;map00195|Photosynthesis
f2p41_2087_3955	gi|566177768|ref|XM_002308473.2|	3679	E:0	Populus trichocarpa hypothetical protein (POPTR_0006s23500g) mRNA, complete cds	gi|566177769|ref|XP_002308509.2|	1119	E:0	hypothetical protein POPTR_0006s23500g [Populus trichocarpa]	HSDD2_ARATH	816	E:0	RecName: Full=3beta-hydroxysteroid-dehydrogenase/decarboxylase isoform 2;^Eukaryota; Viridiplantae; Streptophyta; Embryophyta; Tracheophyta; Spermatophyta; Magnoliophyta; eudicotyledons; Gunneridae; Pentapetalae; rosids; malvids; Brassicales; Brassicaceae; Camelineae; Arabidopsis	HSDD2_ARATH	843	E:0	RecName: Full=3beta-hydroxysteroid-dehydrogenase/decarboxylase isoform 2;^Eukaryota; Viridiplantae; Streptophyta; Embryophyta; Tracheophyta; Spermatophyta; Magnoliophyta; eudicotyledons; Gunneridae; Pentapetalae; rosids; malvids; Brassicales; Brassicaceae; Camelineae; Arabidopsis	PF01073.18	3Beta_HSD	3-beta hydroxysteroid dehydrogenase/isomerase family	COG0451	Nad-dependent epimerase dehydratase	.	ExpAA=69.42^PredHel=3^Topology=o392-414i421-443o491-524i	.	GO:0016126|sterol biosynthetic processGO:0006694|steroid biosynthetic process;GO:0055114|oxidation-reduction process	GO:0003854|3-beta-hydroxy-delta5-steroid dehydrogenase activity;GO:0047012|sterol-4-alpha-carboxylate 3-dehydrogenase (decarboxylating) activityGO:0003854|3-beta-hydroxy-delta5-steroid dehydrogenase activity;GO:0016616|oxidoreductase activity, acting on the CH-OH group of donors, NAD or NADP as acceptor;GO:0003824|catalytic activity;GO:0050662|coenzyme binding	GO:0005789|endoplasmic reticulum membrane;GO:0016021|integral component of membrane;GO:0016020|membrane	K07748|E1.1.1.170, NSDHL, ERG26; sterol-4alpha-carboxylate 3-dehydrogenase (decarboxylating) [EC:1.1.1.170]	map00100|Steroid biosynthesis;map01100|Metabolic pathways;map01130|Biosynthesis of antibiotics
f16p60_803_32696	gi|118483556|gb|EF145524.1|	1345	E:0	Populus trichocarpa clone WS01125_L12 unknown mRNA	gi|224144252|ref|XP_002325236.1|	242	E:6e-78	hypothetical protein POPTR_0018s13330g [Populus trichocarpa]	GRXC4_ARATH	181	E:1e-55	RecName: Full=Glutaredoxin-C4;^Eukaryota; Viridiplantae; Streptophyta; Embryophyta; Tracheophyta; Spermatophyta; Magnoliophyta; eudicotyledons; Gunneridae; Pentapetalae; rosids; malvids; Brassicales; Brassicaceae; Camelineae; Arabidopsis	GRXC4_ARATH	191	E:2e-61	RecName: Full=Glutaredoxin-C4;^Eukaryota; Viridiplantae; Streptophyta; Embryophyta; Tracheophyta; Spermatophyta; Magnoliophyta; eudicotyledons; Gunneridae; Pentapetalae; rosids; malvids; Brassicales; Brassicaceae; Camelineae; Arabidopsis	PF00462.23	Glutaredoxin	Glutaredoxin	COG0695	Glutaredoxin	.	ExpAA=22.33^PredHel=1^Topology=i7-29o	.	GO:0045454|cell redox homeostasisGO:0045454|cell redox homeostasis	GO:0009055|electron carrier activity;GO:0015035|protein disulfide oxidoreductase activityGO:0009055|electron carrier activity;GO:0015035|protein disulfide oxidoreductase activity	GO:0005783|endoplasmic reticulum;GO:0005794|Golgi apparatus;GO:0005773|vacuole	K03676|grxC, GLRX, GLRX2; glutaredoxin 3	map01100|Metabolic pathways;map00240|Pyrimidine metabolism;map00230|Purine metabolism
f2p60_2887_1895	gi|566189491|ref|XM_002315577.2|	5057	E:0	Populus trichocarpa GLUCOSIDASE 1 family protein (POPTR_0010s06890g) mRNA, complete cds	gi|224110718|ref|XP_002315613.1|	1680	E:0	GLUCOSIDASE 1 family protein [Populus trichocarpa]	GCS1_ARATH	1135	E:0	RecName: Full=Mannosyl-oligosaccharide glucosidase GCS1;^Eukaryota; Viridiplantae; Streptophyta; Embryophyta; Tracheophyta; Spermatophyta; Magnoliophyta; eudicotyledons; Gunneridae; Pentapetalae; rosids; malvids; Brassicales; Brassicaceae; Camelineae; Arabidopsis	GCS1_ARATH	1150	E:0	RecName: Full=Mannosyl-oligosaccharide glucosidase GCS1;^Eukaryota; Viridiplantae; Streptophyta; Embryophyta; Tracheophyta; Spermatophyta; Magnoliophyta; eudicotyledons; Gunneridae; Pentapetalae; rosids; malvids; Brassicales; Brassicaceae; Camelineae; Arabidopsis	PF16923.4	Glyco_hydro_63N	Glycosyl hydrolase family 63 N-terminal domain	ENOG410XTHA	mannosyloligosaccharide glucosidase	.	ExpAA=22.49^PredHel=1^Topology=i70-89o	.	GO:0009913|epidermal cell differentiation;GO:0009311|oligosaccharide metabolic process;GO:0010053|root epidermal cell differentiation	GO:0004558|alpha-1,4-glucosidase activity;GO:0004573|mannosyl-oligosaccharide glucosidase activity	GO:0005783|endoplasmic reticulum;GO:0005789|endoplasmic reticulum membrane;GO:0016021|integral component of membrane	K01228|GCS1; mannosyl-oligosaccharide glucosidase [EC:3.2.1.106]	map04141|Protein processing in endoplasmic reticulum;map01100|Metabolic pathways;map00510|N-Glycan biosynthesis
f2p60_1219_27750	gi|566187842|ref|XM_002312929.2|	1940	E:0	Populus trichocarpa L-ascorbate peroxidase family protein (POPTR_0009s13650g) mRNA, complete cds	gi|224103203|ref|XP_002312965.1|	550	E:0	L-ascorbate peroxidase family protein [Populus trichocarpa]	APX3_ARATH	454	E:3e-158	RecName: Full=L-ascorbate peroxidase 3;^Eukaryota; Viridiplantae; Streptophyta; Embryophyta; Tracheophyta; Spermatophyta; Magnoliophyta; eudicotyledons; Gunneridae; Pentapetalae; rosids; malvids; Brassicales; Brassicaceae; Camelineae; Arabidopsis	APX3_ARATH	466	E:6e-165	RecName: Full=L-ascorbate peroxidase 3;^Eukaryota; Viridiplantae; Streptophyta; Embryophyta; Tracheophyta; Spermatophyta; Magnoliophyta; eudicotyledons; Gunneridae; Pentapetalae; rosids; malvids; Brassicales; Brassicaceae; Camelineae; Arabidopsis	PF00141.22	peroxidase	Peroxidase	COG0376	Bifunctional enzyme with both catalase and broad- spectrum peroxidase activity (By similarity)	.	ExpAA=22.67^PredHel=1^Topology=o257-279i	.	GO:0034599|cellular response to oxidative stress;GO:0042744|hydrogen peroxide catabolic process;GO:0009735|response to cytokinin;GO:0006979|response to oxidative stress;GO:0000302|response to reactive oxygen speciesGO:0006979|response to oxidative stress;GO:0055114|oxidation-reduction process	GO:0004130|cytochrome-c peroxidase activity;GO:0020037|heme binding;GO:0016688|L-ascorbate peroxidase activity;GO:0046872|metal ion bindingGO:0004601|peroxidase activity;GO:0020037|heme binding	GO:0009507|chloroplast;GO:0009941|chloroplast envelope;GO:0046861|glyoxysomal membrane;GO:0016021|integral component of membrane;GO:0005739|mitochondrion;GO:0005778|peroxisomal membrane;GO:0005777|peroxisome;GO:0009506|plasmodesma;GO:0009536|plastid;GO:0005774|vacuolar membrane;GO:0005773|vacuole	K00434|E1.11.1.11; L-ascorbate peroxidase [EC:1.11.1.11]	map00053|Ascorbate and aldarate metabolism;map00480|Glutathione metabolism
f2p7_1126_9944	gi|566163959|ref|XM_002304848.2|	1033	E:0	Populus trichocarpa hypothetical protein (POPTR_0003s21610g) mRNA, complete cds	gi|743837024|ref|XP_011025398.1|	379	E:4e-122	PREDICTED: uncharacterized protein LOC105126277 [Populus euphratica]	PER38_ARATH	201	E:2e-59	RecName: Full=Peroxidase 38;^Eukaryota; Viridiplantae; Streptophyta; Embryophyta; Tracheophyta; Spermatophyta; Magnoliophyta; eudicotyledons; Gunneridae; Pentapetalae; rosids; malvids; Brassicales; Brassicaceae; Camelineae; Arabidopsis	PER38_ARATH	203	E:2e-61	RecName: Full=Peroxidase 38;^Eukaryota; Viridiplantae; Streptophyta; Embryophyta; Tracheophyta; Spermatophyta; Magnoliophyta; eudicotyledons; Gunneridae; Pentapetalae; rosids; malvids; Brassicales; Brassicaceae; Camelineae; Arabidopsis	PF00141.22	peroxidase	Peroxidase	ENOG41119N5	Removal of H(2)O(2), oxidation of toxic reductants, biosynthesis and degradation of lignin, suberization, auxin catabolism, response to environmental stresses such as wounding, pathogen attack and oxidative stress. These functions might be dependent on each isozyme isoform in each plant tissue	.	ExpAA=21.38^PredHel=1^Topology=i20-37o	.	GO:0042744|hydrogen peroxide catabolic process;GO:0006979|response to oxidative stressGO:0006979|response to oxidative stress;GO:0055114|oxidation-reduction process	GO:0020037|heme binding;GO:0046872|metal ion binding;GO:0004601|peroxidase activityGO:0004601|peroxidase activity;GO:0020037|heme binding	GO:0005576|extracellular region;GO:0005773|vacuole	K00430|E1.11.1.7; peroxidase [EC:1.11.1.7]	map01100|Metabolic pathways;map00940|Phenylpropanoid biosynthesis;map01110|Biosynthesis of secondary metabolites
f2p60_1051_296210	gi|566212918|ref|XM_006373279.1|	1838	E:0	Populus trichocarpa hypothetical protein (POPTR_0017s12360g) mRNA, complete cds	gi|224141429|ref|XP_002324075.1|	403	E:1e-138	hypothetical protein POPTR_0017s12360g [Populus trichocarpa]	VTI13_ARATH	323	E:1e-108	RecName: Full=Vesicle transport v-SNARE 13;^Eukaryota; Viridiplantae; Streptophyta; Embryophyta; Tracheophyta; Spermatophyta; Magnoliophyta; eudicotyledons; Gunneridae; Pentapetalae; rosids; malvids; Brassicales; Brassicaceae; Camelineae; Arabidopsis	VTI13_ARATH	351	E:1e-121	RecName: Full=Vesicle transport v-SNARE 13;^Eukaryota; Viridiplantae; Streptophyta; Embryophyta; Tracheophyta; Spermatophyta; Magnoliophyta; eudicotyledons; Gunneridae; Pentapetalae; rosids; malvids; Brassicales; Brassicaceae; Camelineae; Arabidopsis	PF05008.14	V-SNARE	Vesicle transport v-SNARE protein N-terminus	ENOG4111J90	vesicle transport through interaction with t-SNAREs	.	ExpAA=19.93^PredHel=1^Topology=i198-217o	.	GO:0006888|ER to Golgi vesicle-mediated transport;GO:0006896|Golgi to vacuole transport;GO:0006623|protein targeting to vacuole;GO:0042147|retrograde transport, endosome to Golgi;GO:0048280|vesicle fusion with Golgi apparatusGO:0006886|intracellular protein transport	GO:0005484|SNAP receptor activity	GO:0005829|cytosol;GO:0005789|endoplasmic reticulum membrane;GO:0012507|ER to Golgi transport vesicle membrane;GO:0005794|Golgi apparatus;GO:0016021|integral component of membrane;GO:0031902|late endosome membrane;GO:0031201|SNARE complexGO:0016020|membrane	K08493|VTI1; vesicle transport through interaction with t-SNAREs 1	map04130|SNARE interactions in vesicular transport
f2p60_2142_3782	gi|566194911|ref|XM_002316826.2|	3823	E:0	Populus trichocarpa curculin-like lectin family protein (POPTR_0011s11200g) mRNA, complete cds	gi|566194912|ref|XP_002316862.2|	1078	E:0	curculin-like lectin family protein [Populus trichocarpa]	ALG9_ARATH	766	E:0	RecName: Full=Dol-P-Man:Man(6)GlcNAc(2)-PP-Dol alpha-1,2-mannosyltransferase;^Eukaryota; Viridiplantae; Streptophyta; Embryophyta; Tracheophyta; Spermatophyta; Magnoliophyta; eudicotyledons; Gunneridae; Pentapetalae; rosids; malvids; Brassicales; Brassicaceae; Camelineae; Arabidopsis	ALG9_ARATH	824	E:0	RecName: Full=Dol-P-Man:Man(6)GlcNAc(2)-PP-Dol alpha-1,2-mannosyltransferase;^Eukaryota; Viridiplantae; Streptophyta; Embryophyta; Tracheophyta; Spermatophyta; Magnoliophyta; eudicotyledons; Gunneridae; Pentapetalae; rosids; malvids; Brassicales; Brassicaceae; Camelineae; Arabidopsis	PF03901.16	Glyco_transf_22	Alg9-like mannosyltransferase family	ENOG410XP6D	asparagine-linked glycosylation 9, alpha-1,2-mannosyltransferase homolog (S. cerevisiae)	.	ExpAA=178.19^PredHel=7^Topology=i69-91o153-175i182-204o228-250i263-285o321-343i350-367o	.	GO:0006490|oligosaccharide-lipid intermediate biosynthetic process;GO:0006486|protein glycosylation;GO:0030433|ubiquitin-dependent ERAD pathway	GO:0000026|alpha-1,2-mannosyltransferase activity;GO:0052926|dol-P-Man:Man(6)GlcNAc(2)-PP-Dol alpha-1,2-mannosyltransferase activity;GO:0052918|dol-P-Man:Man(8)GlcNAc(2)-PP-Dol alpha-1,2-mannosyltransferase activity;GO:0004377|GDP-Man:Man3GlcNAc2-PP-Dol alpha-1,2-mannosyltransferase activity;GO:0016301|kinase activityGO:0016757|transferase activity, transferring glycosyl groups	GO:0005783|endoplasmic reticulum;GO:0005789|endoplasmic reticulum membrane;GO:0016021|integral component of membrane	K03846|ALG9; alpha-1,2-mannosyltransferase [EC:2.4.1.259 2.4.1.261]	map00513|Various types of N-glycan biosynthesis;map01100|Metabolic pathways;map00510|N-Glycan biosynthesis
f2p59_3771_622	gi|566165231|ref|XM_002305665.2|	6713	E:0	Populus trichocarpa FLAGELLIN-SENSITIVE 2 family protein (POPTR_0004s06420g) mRNA, complete cds	gi|566165232|ref|XP_002305701.2|	2213	E:0	FLAGELLIN-SENSITIVE 2 family protein [Populus trichocarpa]	FLS2_ARATH	1177	E:0	RecName: Full=LRR receptor-like serine/threonine-protein kinase FLS2;^Eukaryota; Viridiplantae; Streptophyta; Embryophyta; Tracheophyta; Spermatophyta; Magnoliophyta; eudicotyledons; Gunneridae; Pentapetalae; rosids; malvids; Brassicales; Brassicaceae; Camelineae; Arabidopsis	FLS2_ARATH	1208	E:0	RecName: Full=LRR receptor-like serine/threonine-protein kinase FLS2;^Eukaryota; Viridiplantae; Streptophyta; Embryophyta; Tracheophyta; Spermatophyta; Magnoliophyta; eudicotyledons; Gunneridae; Pentapetalae; rosids; malvids; Brassicales; Brassicaceae; Camelineae; Arabidopsis	PF08263.11	LRRNT_2	Leucine rich repeat N-terminal domain	COG0515	Serine Threonine protein kinase	.	ExpAA=37.80^PredHel=1^Topology=o816-838i	.	GO:0052544|defense response by callose deposition in cell wall;GO:0042742|defense response to bacterium;GO:0016045|detection of bacterium;GO:0006898|receptor-mediated endocytosis;GO:0010359|regulation of anion channel activityGO:0006468|protein phosphorylation	GO:0005524|ATP binding;GO:0004675|transmembrane receptor protein serine/threonine kinase activityGO:0005515|protein binding;GO:0004672|protein kinase activity;GO:0005524|ATP binding	GO:0005768|endosome;GO:0010008|endosome membrane;GO:0016021|integral component of membrane;GO:0016020|membrane;GO:0005886|plasma membrane	K13420|FLS2; LRR receptor-like serine/threonine-protein kinase FLS2 [EC:2.7.11.1]	map04626|Plant-pathogen interaction
f2p60_3601_829	gi|743898648|ref|XM_011044317.1|	5661	E:0	PREDICTED: Populus euphratica ATPase 11, plasma membrane-type (LOC105138269), transcript variant X2, mRNA	gi|743898647|ref|XP_011042618.1|	1714	E:0	PREDICTED: ATPase 11, plasma membrane-type [Populus euphratica]	PMA11_ARATH	1635	E:0	RecName: Full=ATPase 11, plasma membrane-type;^Eukaryota; Viridiplantae; Streptophyta; Embryophyta; Tracheophyta; Spermatophyta; Magnoliophyta; eudicotyledons; Gunneridae; Pentapetalae; rosids; malvids; Brassicales; Brassicaceae; Camelineae; Arabidopsis	PMA11_ARATH	1802	E:0	RecName: Full=ATPase 11, plasma membrane-type;^Eukaryota; Viridiplantae; Streptophyta; Embryophyta; Tracheophyta; Spermatophyta; Magnoliophyta; eudicotyledons; Gunneridae; Pentapetalae; rosids; malvids; Brassicales; Brassicaceae; Camelineae; Arabidopsis	PF00690.25	Cation_ATPase_N	Cation transporter/ATPase, N-terminus	COG0474	P-type atpase	.	ExpAA=191.94^PredHel=8^Topology=i65-87o97-116i244-266o281-303i649-671o713-735i791-813o823-842i	.	GO:0006754|ATP biosynthetic process	GO:0005524|ATP binding;GO:0008553|hydrogen-exporting ATPase activity, phosphorylative mechanism;GO:0046872|metal ion binding	GO:0016021|integral component of membrane;GO:0016020|membrane;GO:0005886|plasma membrane	K01535|E3.6.3.6; H+-transporting ATPase [EC:3.6.3.6]	map00190|Oxidative phosphorylation
f3p45_4837_122	gi|743923703|ref|XM_011007652.1|	7764	E:0	PREDICTED: Populus euphratica ABC transporter B family member 4-like (LOC105112080), transcript variant X1, mRNA	gi|743923704|ref|XP_011005954.1|	2422	E:0	PREDICTED: ABC transporter B family member 4-like [Populus euphratica]	AB4B_ARATH	1855	E:0	RecName: Full=ABC transporter B family member 4;^Eukaryota; Viridiplantae; Streptophyta; Embryophyta; Tracheophyta; Spermatophyta; Magnoliophyta; eudicotyledons; Gunneridae; Pentapetalae; rosids; malvids; Brassicales; Brassicaceae; Camelineae; Arabidopsis	AB4B_ARATH	1935	E:0	RecName: Full=ABC transporter B family member 4;^Eukaryota; Viridiplantae; Streptophyta; Embryophyta; Tracheophyta; Spermatophyta; Magnoliophyta; eudicotyledons; Gunneridae; Pentapetalae; rosids; malvids; Brassicales; Brassicaceae; Camelineae; Arabidopsis	PF00664.22	ABC_membrane	ABC transporter transmembrane region	COG1132	(ABC) transporter	.	ExpAA=222.17^PredHel=10^Topology=i64-86o115-137i188-207o212-234i291-313o726-748i769-791o862-884i951-973o988-1010i	.	GO:0010315|auxin efflux;GO:0060919|auxin influx;GO:0009926|auxin polar transport;GO:0009734|auxin-activated signaling pathway;GO:0010540|basipetal auxin transport;GO:0009630|gravitropism;GO:0009733|response to auxin;GO:0009735|response to cytokinin;GO:0048767|root hair elongationGO:0006810|transport;GO:0055085|transmembrane transport	GO:0005524|ATP binding;GO:0010329|auxin efflux transmembrane transporter activity;GO:0010328|auxin influx transmembrane transporter activity;GO:0008559|xenobiotic-transporting ATPase activityGO:0005524|ATP binding;GO:0042626|ATPase activity, coupled to transmembrane movement of substances;GO:0016887|ATPase activity	GO:0016021|integral component of membrane;GO:0016020|membrane;GO:0005886|plasma membrane;GO:0009506|plasmodesmaGO:0016021|integral component of membrane	K05658|ABCB1; ATP-binding cassette, subfamily B (MDR/TAP), member 1 [EC:3.6.3.44]	map02010|ABC transporters;map05206|MicroRNAs in cancer;map04976|Bile secretion
f2p18_689_14242	gi|566156087|ref|XM_002300735.2|	1179	E:0	Populus trichocarpa ribophorin 2 family protein (POPTR_0002s03790g) mRNA, complete cds	gi|224062133|ref|XP_002300771.1|	221	E:1e-64	ribophorin 2 family protein [Populus trichocarpa]	RPN2_ORYSJ	154	E:1e-41	RecName: Full=Dolichyl-diphosphooligosaccharide--protein glycosyltransferase subunit 2;^Eukaryota; Viridiplantae; Streptophyta; Embryophyta; Tracheophyta; Spermatophyta; Magnoliophyta; Liliopsida; Poales; Poaceae; BOP clade; Oryzoideae; Oryzeae; Oryzinae; Oryza	RPN2_ORYSJ	243	E:4e-75	RecName: Full=Dolichyl-diphosphooligosaccharide--protein glycosyltransferase subunit 2;^Eukaryota; Viridiplantae; Streptophyta; Embryophyta; Tracheophyta; Spermatophyta; Magnoliophyta; Liliopsida; Poales; Poaceae; BOP clade; Oryzoideae; Oryzeae; Oryzinae; Oryza	PF05817.13	Ribophorin_II	Oligosaccharyltransferase subunit Ribophorin II	ENOG410XRF2	ribophorin II	.	ExpAA=65.89^PredHel=3^Topology=o72-94i106-128o138-160i	.	GO:0006487|protein N-linked glycosylation;GO:0009409|response to coldGO:0006487|protein N-linked glycosylation	GO:0016757|transferase activity, transferring glycosyl groups	GO:0005794|Golgi apparatus;GO:0016021|integral component of membrane;GO:0005739|mitochondrion;GO:0008250|oligosaccharyltransferase complex;GO:0009505|plant-type cell wall;GO:0005886|plasma membrane;GO:0009506|plasmodesma;GO:0005774|vacuolar membraneGO:0008250|oligosaccharyltransferase complex;GO:0016021|integral component of membrane	K12667|SWP1, RPN2; oligosaccharyltransferase complex subunit delta (ribophorin II)	map04141|Protein processing in endoplasmic reticulum;map00513|Various types of N-glycan biosynthesis;map01100|Metabolic pathways;map00510|N-Glycan biosynthesis
f4p60_1830_22988	gi|118486535|gb|EF147072.1|	3048	E:0	Populus trichocarpa clone WS01227_C07 unknown mRNA	gi|743921919|ref|XP_011005030.1|	912	E:0	PREDICTED: 3-ketoacyl-CoA synthase 3-like [Populus euphratica]	KCS12_ARATH	646	E:0	RecName: Full=3-ketoacyl-CoA synthase 12 {ECO:0000303|PubMed:18465198};^Eukaryota; Viridiplantae; Streptophyta; Embryophyta; Tracheophyta; Spermatophyta; Magnoliophyta; eudicotyledons; Gunneridae; Pentapetalae; rosids; malvids; Brassicales; Brassicaceae; Camelineae; Arabidopsis	KCS12_ARATH	670	E:0	RecName: Full=3-ketoacyl-CoA synthase 12 {ECO:0000303|PubMed:18465198};^Eukaryota; Viridiplantae; Streptophyta; Embryophyta; Tracheophyta; Spermatophyta; Magnoliophyta; eudicotyledons; Gunneridae; Pentapetalae; rosids; malvids; Brassicales; Brassicaceae; Camelineae; Arabidopsis	PF08392.11	FAE1_CUT1_RppA	FAE1/Type III polyketide synthase-like protein	ENOG410Y9JS	3-ketoacyl-coa synthase	.	ExpAA=40.42^PredHel=2^Topology=o4-23i160-182o	.	GO:0006633|fatty acid biosynthetic processGO:0006633|fatty acid biosynthetic process	GO:0102336|3-oxo-arachidoyl-CoA synthase activity;GO:0102337|3-oxo-cerotoyl-CoA synthase activity;GO:0102338|3-oxo-lignoceronyl-CoA synthase activityGO:0016747|transferase activity, transferring acyl groups other than amino-acyl groups	GO:0005783|endoplasmic reticulum;GO:0016020|membraneGO:0016020|membrane	K15397|KCS; 3-ketoacyl-CoA synthase [EC:2.3.1.199]	map00062|Fatty acid elongation;map01110|Biosynthesis of secondary metabolites
f2p60_921_30917	gi|566162910|ref|XM_002304592.2|	1598	E:0	Populus trichocarpa 3-beta-hydroxysteroid-delta(8) family protein (POPTR_0003s15880g) mRNA, complete cds	gi|224075427|ref|XP_002304628.1|	417	E:1e-144	3-beta-hydroxysteroid-delta(8) family protein [Populus trichocarpa]	EBP_ORYSJ	278	E:2e-91	RecName: Full=Probable 3-beta-hydroxysteroid-Delta(8),Delta(7)-isomerase;^Eukaryota; Viridiplantae; Streptophyta; Embryophyta; Tracheophyta; Spermatophyta; Magnoliophyta; Liliopsida; Poales; Poaceae; BOP clade; Oryzoideae; Oryzeae; Oryzinae; Oryza	EBP_ORYSJ	296	E:8e-100	RecName: Full=Probable 3-beta-hydroxysteroid-Delta(8),Delta(7)-isomerase;^Eukaryota; Viridiplantae; Streptophyta; Embryophyta; Tracheophyta; Spermatophyta; Magnoliophyta; Liliopsida; Poales; Poaceae; BOP clade; Oryzoideae; Oryzeae; Oryzinae; Oryza	PF05241.11	EBP	Emopamil binding protein	ENOG41101ES	emopamil binding protein (sterol isomerase)	.	ExpAA=110.22^PredHel=5^Topology=o24-46i59-81o114-136i143-165o180-202i	.	GO:0016126|sterol biosynthetic processGO:0016125|sterol metabolic process	GO:0000247|C-8 sterol isomerase activity;GO:0047750|cholestenol delta-isomerase activityGO:0047750|cholestenol delta-isomerase activity	GO:0005789|endoplasmic reticulum membrane;GO:0016021|integral component of membrane;GO:0005886|plasma membraneGO:0016021|integral component of membrane	K01824|EBP; cholestenol delta-isomerase [EC:5.3.3.5]	map00100|Steroid biosynthesis;map01100|Metabolic pathways;map01110|Biosynthesis of secondary metabolites
f3p60_2027_4148	gi|566181339|ref|XM_002310289.2|	3526	E:0	Populus trichocarpa hypothetical protein (POPTR_0007s14600g) mRNA, complete cds	gi|743862222|ref|XP_011031335.1|	1018	E:0	PREDICTED: lysosomal Pro-X carboxypeptidase [Populus euphratica]	PCP_PONAB	417	E:9e-137	RecName: Full=Lysosomal Pro-X carboxypeptidase;^Eukaryota; Metazoa; Chordata; Craniata; Vertebrata; Euteleostomi; Mammalia; Eutheria; Euarchontoglires; Primates; Haplorrhini; Catarrhini; Hominidae; Pongo	PCP_BOVIN	417	E:9e-139	RecName: Full=Lysosomal Pro-X carboxypeptidase;^Eukaryota; Metazoa; Chordata; Craniata; Vertebrata; Euteleostomi; Mammalia; Eutheria; Laurasiatheria; Cetartiodactyla; Ruminantia; Pecora; Bovidae; Bovinae; Bos	PF05577.11	Peptidase_S28	Serine carboxypeptidase S28	ENOG410Y38A	Lysosomal Pro-X	.	ExpAA=33.18^PredHel=1^Topology=i13-35o	.	GO:0060055|angiogenesis involved in wound healing;GO:0003085|negative regulation of systemic arterial blood pressure;GO:0006508|proteolysis;GO:0043535|regulation of blood vessel endothelial cell migrationGO:0006508|proteolysis	GO:0004180|carboxypeptidase activity;GO:0008239|dipeptidyl-peptidase activity;GO:0008236|serine-type peptidase activityGO:0008236|serine-type peptidase activity	GO:0005764|lysosome	K01285|PRCP; lysosomal Pro-X carboxypeptidase [EC:3.4.16.2]	map04614|Renin-angiotensin system;map04974|Protein digestion and absorption
f2p60_2014_21981	gi|224134229|ref|XM_002321732.1|	3507	E:0	Populus trichocarpa Calnexin precursor family protein (POPTR_0015s12070g) mRNA, complete cds	gi|224134230|ref|XP_002321768.1|	910	E:0	Calnexin precursor family protein [Populus trichocarpa]	CALX_SOYBN	709	E:0	RecName: Full=Calnexin homolog;^Eukaryota; Viridiplantae; Streptophyta; Embryophyta; Tracheophyta; Spermatophyta; Magnoliophyta; eudicotyledons; Gunneridae; Pentapetalae; rosids; fabids; Fabales; Fabaceae; Papilionoideae; Phaseoleae; Glycine; Soja	CALX1_ARATH	806	E:0	RecName: Full=Calnexin homolog 1;^Eukaryota; Viridiplantae; Streptophyta; Embryophyta; Tracheophyta; Spermatophyta; Magnoliophyta; eudicotyledons; Gunneridae; Pentapetalae; rosids; malvids; Brassicales; Brassicaceae; Camelineae; Arabidopsis	PF00262.17	Calreticulin	Calreticulin family	ENOG410XP7T	Calnexin	.	ExpAA=42.38^PredHel=2^Topology=i7-26o465-487i	.	GO:0006457|protein foldingGO:0006457|protein folding	GO:0005509|calcium ion binding;GO:0030246|carbohydrate binding;GO:0051082|unfolded protein bindingGO:0005509|calcium ion binding;GO:0051082|unfolded protein binding	GO:0009507|chloroplast;GO:0005783|endoplasmic reticulum;GO:0005789|endoplasmic reticulum membrane;GO:0016021|integral component of membrane;GO:0016020|membrane;GO:0005739|mitochondrion;GO:0009505|plant-type cell wall;GO:0005886|plasma membrane;GO:0009506|plasmodesma;GO:0005774|vacuolar membrane;GO:0005773|vacuoleGO:0005783|endoplasmic reticulum	K08054|CANX; calnexin	map04141|Protein processing in endoplasmic reticulum;map05166|HTLV-I infection;map04145|Phagosome;map04918|Thyroid hormone synthesis;map04612|Antigen processing and presentation
f2p53_1521_6898	gi|566192450|ref|XM_002316380.2|	2695	E:0	Populus trichocarpa transducin family protein (POPTR_0010s23870g) mRNA, complete cds	gi|566192451|ref|XP_002316416.2|	757	E:0	transducin family protein [Populus trichocarpa]	PHF1_ARATH	509	E:3e-176	RecName: Full=SEC12-like protein 1;^Eukaryota; Viridiplantae; Streptophyta; Embryophyta; Tracheophyta; Spermatophyta; Magnoliophyta; eudicotyledons; Gunneridae; Pentapetalae; rosids; malvids; Brassicales; Brassicaceae; Camelineae; Arabidopsis	PHF1_ARATH	523	E:0	RecName: Full=SEC12-like protein 1;^Eukaryota; Viridiplantae; Streptophyta; Embryophyta; Tracheophyta; Spermatophyta; Magnoliophyta; eudicotyledons; Gunneridae; Pentapetalae; rosids; malvids; Brassicales; Brassicaceae; Camelineae; Arabidopsis	PF00400.31	WD40	WD domain, G-beta repeat	ENOG410XRQK	Prolactin regulatory element binding	.	ExpAA=21.56^PredHel=1^Topology=i328-347o	.	GO:0016036|cellular response to phosphate starvation;GO:0006888|ER to Golgi vesicle-mediated transport;GO:0006817|phosphate ion transport;GO:0009306|protein secretion;GO:0003400|regulation of COPII vesicle coating	GO:0005096|GTPase activator activity;GO:0051020|GTPase binding;GO:0005090|Sar guanyl-nucleotide exchange factor activityGO:0005515|protein binding	GO:0005783|endoplasmic reticulum;GO:0030176|integral component of endoplasmic reticulum membrane;GO:0005886|plasma membrane	K14003|PREB, SEC12; prolactin regulatory element-binding protein	map04141|Protein processing in endoplasmic reticulum
f2p39_1327_8327	gi|566181122|ref|XM_002310238.2|	2257	E:0	Populus trichocarpa Peroxidase 49 precursor family protein (POPTR_0007s13420g) mRNA, complete cds	gi|591403368|gb|AHL39156.1|	613	E:0	class III peroxidase [Populus trichocarpa]	PER72_ARATH	516	E:0	RecName: Full=Peroxidase 72;^Eukaryota; Viridiplantae; Streptophyta; Embryophyta; Tracheophyta; Spermatophyta; Magnoliophyta; eudicotyledons; Gunneridae; Pentapetalae; rosids; malvids; Brassicales; Brassicaceae; Camelineae; Arabidopsis	PER72_ARATH	546	E:0	RecName: Full=Peroxidase 72;^Eukaryota; Viridiplantae; Streptophyta; Embryophyta; Tracheophyta; Spermatophyta; Magnoliophyta; eudicotyledons; Gunneridae; Pentapetalae; rosids; malvids; Brassicales; Brassicaceae; Camelineae; Arabidopsis	PF00141.22	peroxidase	Peroxidase	ENOG410YA1B	peroxidase	.	ExpAA=19.97^PredHel=1^Topology=i5-24o	.	GO:0042744|hydrogen peroxide catabolic process;GO:0009809|lignin biosynthetic process;GO:0006979|response to oxidative stressGO:0006979|response to oxidative stress;GO:0055114|oxidation-reduction process	GO:0020037|heme binding;GO:0046872|metal ion binding;GO:0004601|peroxidase activityGO:0004601|peroxidase activity;GO:0020037|heme binding	GO:0005576|extracellular region	K00430|E1.11.1.7; peroxidase [EC:1.11.1.7]	map01100|Metabolic pathways;map00940|Phenylpropanoid biosynthesis;map01110|Biosynthesis of secondary metabolites
f2p60_3580_18494	gi|566212119|ref|XM_002323734.2|	6355	E:0	Populus trichocarpa 26S proteasome regulatory subunit family protein (POPTR_0017s08150g) mRNA, complete cds	gi|224140807|ref|XP_002323770.1|	1933	E:0	26S proteasome regulatory subunit family protein [Populus trichocarpa]	PSD1A_ARATH	1643	E:0	RecName: Full=26S proteasome non-ATPase regulatory subunit 1 homolog A;^Eukaryota; Viridiplantae; Streptophyta; Embryophyta; Tracheophyta; Spermatophyta; Magnoliophyta; eudicotyledons; Gunneridae; Pentapetalae; rosids; malvids; Brassicales; Brassicaceae; Camelineae; Arabidopsis	PSD1A_ARATH	1699	E:0	RecName: Full=26S proteasome non-ATPase regulatory subunit 1 homolog A;^Eukaryota; Viridiplantae; Streptophyta; Embryophyta; Tracheophyta; Spermatophyta; Magnoliophyta; eudicotyledons; Gunneridae; Pentapetalae; rosids; malvids; Brassicales; Brassicaceae; Camelineae; Arabidopsis	PF13646.5	HEAT_2	HEAT repeats	COG5116	26s proteasome	.	ExpAA=23.38^PredHel=1^Topology=o785-807i	.	GO:0043161|proteasome-mediated ubiquitin-dependent protein catabolic process;GO:0042176|regulation of protein catabolic process	GO:0030234|enzyme regulator activity	GO:0005829|cytosol;GO:0005634|nucleus;GO:0000502|proteasome complex;GO:0008540|proteasome regulatory particle, base subcomplex;GO:0034515|proteasome storage granule	K03032|PSMD1, RPN2; 26S proteasome regulatory subunit N2	map03050|Proteasome;map05169|Epstein-Barr virus infection
f3p60_1621_24371	gi|118487804|gb|EF147720.1|	2835	E:0	Populus trichocarpa clone WS0124_I14 unknown mRNA	gi|118487805|gb|ABK95726.1|	817	E:0	unknown [Populus trichocarpa]	PDI13_ARATH	283	E:1e-85	RecName: Full=Protein disulfide isomerase-like 1-3;^Eukaryota; Viridiplantae; Streptophyta; Embryophyta; Tracheophyta; Spermatophyta; Magnoliophyta; eudicotyledons; Gunneridae; Pentapetalae; rosids; malvids; Brassicales; Brassicaceae; Camelineae; Arabidopsis	PDI13_ARATH	283	E:6e-87	RecName: Full=Protein disulfide isomerase-like 1-3;^Eukaryota; Viridiplantae; Streptophyta; Embryophyta; Tracheophyta; Spermatophyta; Magnoliophyta; eudicotyledons; Gunneridae; Pentapetalae; rosids; malvids; Brassicales; Brassicaceae; Camelineae; Arabidopsis	PF00085.19	Thioredoxin	Thioredoxin	COG0526	Thioredoxin	.	ExpAA=20.95^PredHel=1^Topology=i13-35o	.	GO:0045454|cell redox homeostasis;GO:0006457|protein folding;GO:0034976|response to endoplasmic reticulum stressGO:0045454|cell redox homeostasis	GO:0003756|protein disulfide isomerase activity	GO:0009507|chloroplast;GO:0005783|endoplasmic reticulum;GO:0005788|endoplasmic reticulum lumen;GO:0005774|vacuolar membrane	K09580|PDIA1, P4HB; protein disulfide-isomerase A1 [EC:5.3.4.1]	map04141|Protein processing in endoplasmic reticulum
f2p60_5180_84	gi|566192068|ref|XM_002316273.2|	8696	E:0	Populus trichocarpa ABC transporter family protein (POPTR_0010s21720g) mRNA, complete cds	gi|224112851|ref|XP_002316309.1|	2608	E:0	ABC transporter family protein [Populus trichocarpa]	AB20B_ARATH	2237	E:0	RecName: Full=ABC transporter B family member 20;^Eukaryota; Viridiplantae; Streptophyta; Embryophyta; Tracheophyta; Spermatophyta; Magnoliophyta; eudicotyledons; Gunneridae; Pentapetalae; rosids; malvids; Brassicales; Brassicaceae; Camelineae; Arabidopsis	AB20B_ARATH	2429	E:0	RecName: Full=ABC transporter B family member 20;^Eukaryota; Viridiplantae; Streptophyta; Embryophyta; Tracheophyta; Spermatophyta; Magnoliophyta; eudicotyledons; Gunneridae; Pentapetalae; rosids; malvids; Brassicales; Brassicaceae; Camelineae; Arabidopsis	PF00664.22	ABC_membrane	ABC transporter transmembrane region	COG1132	(ABC) transporter	.	ExpAA=265.43^PredHel=12^Topology=i81-103o130-152i203-222o227-249i307-329o344-366i833-855o870-892i946-968o973-995i1053-1075o1090-1112i	.	GO:0006810|transport;GO:0055085|transmembrane transport	GO:0005524|ATP binding;GO:0042626|ATPase activity, coupled to transmembrane movement of substancesGO:0005524|ATP binding;GO:0042626|ATPase activity, coupled to transmembrane movement of substances;GO:0016887|ATPase activity	GO:0016021|integral component of membrane;GO:0005634|nucleus;GO:0005886|plasma membraneGO:0016021|integral component of membrane	K05658|ABCB1; ATP-binding cassette, subfamily B (MDR/TAP), member 1 [EC:3.6.3.44]	map02010|ABC transporters;map05206|MicroRNAs in cancer;map04976|Bile secretion
f5p60_3035_1622	gi|743856215|ref|XM_011031550.1|	5066	E:0	PREDICTED: Populus euphratica ethylene receptor 2-like (LOC105129470), transcript variant X1, mRNA	gi|224099905|ref|XP_002311669.1|	1487	E:0	ethylene receptor family protein [Populus trichocarpa]	ETR2_ARATH	883	E:0	RecName: Full=Ethylene receptor 2;^Eukaryota; Viridiplantae; Streptophyta; Embryophyta; Tracheophyta; Spermatophyta; Magnoliophyta; eudicotyledons; Gunneridae; Pentapetalae; rosids; malvids; Brassicales; Brassicaceae; Camelineae; Arabidopsis	ETR2_ARATH	895	E:0	RecName: Full=Ethylene receptor 2;^Eukaryota; Viridiplantae; Streptophyta; Embryophyta; Tracheophyta; Spermatophyta; Magnoliophyta; eudicotyledons; Gunneridae; Pentapetalae; rosids; malvids; Brassicales; Brassicaceae; Camelineae; Arabidopsis	PF01590.25	GAF	GAF domain	COG0642	Histidine kinase	.	ExpAA=80.65^PredHel=4^Topology=o4-21i52-69o79-101i114-136o	.	GO:0010105|negative regulation of ethylene-activated signaling pathwayGO:0000160|phosphorelay signal transduction system	GO:0005524|ATP binding;GO:0051740|ethylene binding;GO:0038199|ethylene receptor activity;GO:0046872|metal ion binding;GO:0000155|phosphorelay sensor kinase activity;GO:0004674|protein serine/threonine kinase activity;GO:0004872|receptor activityGO:0005515|protein binding	GO:0005783|endoplasmic reticulum;GO:0005789|endoplasmic reticulum membrane;GO:0016021|integral component of membrane	K14509|ETR, ERS; ethylene receptor [EC:2.7.13.-]	map04075|Plant hormone signal transduction
f2p33_2052_4076	gi|566200373|ref|XM_002319858.2|	2246	E:0	Populus trichocarpa zinc finger family protein (POPTR_0013s09710g) mRNA, complete cds	gi|743935490|ref|XP_011012113.1|	921	E:0	PREDICTED: ERAD-associated E3 ubiquitin-protein ligase HRD1B isoform X2 [Populus euphratica]	HRD1A_ARATH	623	E:0	RecName: Full=ERAD-associated E3 ubiquitin-protein ligase HRD1A {ECO:0000305};^Eukaryota; Viridiplantae; Streptophyta; Embryophyta; Tracheophyta; Spermatophyta; Magnoliophyta; eudicotyledons; Gunneridae; Pentapetalae; rosids; malvids; Brassicales; Brassicaceae; Camelineae; Arabidopsis	HRD1A_ARATH	667	E:0	RecName: Full=ERAD-associated E3 ubiquitin-protein ligase HRD1A {ECO:0000305};^Eukaryota; Viridiplantae; Streptophyta; Embryophyta; Tracheophyta; Spermatophyta; Magnoliophyta; eudicotyledons; Gunneridae; Pentapetalae; rosids; malvids; Brassicales; Brassicaceae; Camelineae; Arabidopsis	PF12678.6	zf-rbx1	RING-H2 zinc finger domain	COG5243	zinc ion binding	.	ExpAA=122.47^PredHel=6^Topology=i7-24o34-56i99-121o141-160i173-195o224-246i	.	GO:0030968|endoplasmic reticulum unfolded protein response;GO:0000209|protein polyubiquitination;GO:0042787|protein ubiquitination involved in ubiquitin-dependent protein catabolic process;GO:0030433|ubiquitin-dependent ERAD pathway	GO:0046872|metal ion binding;GO:1904264|ubiquitin protein ligase activity involved in ERAD pathway;GO:1990381|ubiquitin-specific protease binding;GO:0051082|unfolded protein bindingGO:0008270|zinc ion binding;GO:0046872|metal ion binding	GO:0036513|Derlin-1 retrotranslocation complex;GO:0044322|endoplasmic reticulum quality control compartment;GO:0000836|Hrd1p ubiquitin ligase complex;GO:0016021|integral component of membrane	K10601|SYVN1, HRD1; E3 ubiquitin-protein ligase synoviolin [EC:2.3.2.27]	map04141|Protein processing in endoplasmic reticulum;map04120|Ubiquitin mediated proteolysis
f4p60_1506_25097	gi|566155740|ref|XM_002300644.2|	2516	E:0	Populus trichocarpa putative sterol-C-methyltransferase family protein (POPTR_0002s01780g) mRNA, complete cds	gi|224061951|ref|XP_002300680.1|	727	E:0	putative sterol-C-methyltransferase family protein [Populus trichocarpa]	SMT2_ARATH	647	E:0	RecName: Full=24-methylenesterol C-methyltransferase 2;^Eukaryota; Viridiplantae; Streptophyta; Embryophyta; Tracheophyta; Spermatophyta; Magnoliophyta; eudicotyledons; Gunneridae; Pentapetalae; rosids; malvids; Brassicales; Brassicaceae; Camelineae; Arabidopsis	SMT2_ARATH	672	E:0	RecName: Full=24-methylenesterol C-methyltransferase 2;^Eukaryota; Viridiplantae; Streptophyta; Embryophyta; Tracheophyta; Spermatophyta; Magnoliophyta; eudicotyledons; Gunneridae; Pentapetalae; rosids; malvids; Brassicales; Brassicaceae; Camelineae; Arabidopsis	PF02353.19	CMAS	Mycolic acid cyclopropane synthetase	ENOG410XP5G	Methyltransferase	.	ExpAA=32.99^PredHel=1^Topology=i5-27o	.	GO:0009825|multidimensional cell growth;GO:0032876|negative regulation of DNA endoreduplication;GO:0007389|pattern specification process;GO:0016126|sterol biosynthetic process;GO:0010051|xylem and phloem pattern formationGO:0008152|metabolic process;GO:0006694|steroid biosynthetic process	GO:0030797|24-methylenesterol C-methyltransferase activity;GO:0008757|S-adenosylmethionine-dependent methyltransferase activityGO:0008168|methyltransferase activity	GO:0005783|endoplasmic reticulum;GO:0005794|Golgi apparatus	K08242|E2.1.1.143; 24-methylenesterol C-methyltransferase [EC:2.1.1.143]	map00100|Steroid biosynthesis;map01110|Biosynthesis of secondary metabolites
f2p13_1380_26046	gi|743815259|ref|XM_011021597.1|	2248	E:0	PREDICTED: Populus euphratica CAAX prenyl protease 2 (LOC105122482), transcript variant X1, mRNA	gi|743815260|ref|XP_011019899.1|	571	E:0	PREDICTED: CAAX prenyl protease 2 isoform X1 [Populus euphratica]	FACE2_ARATH	355	E:5e-118	RecName: Full=CAAX prenyl protease 2;^Eukaryota; Viridiplantae; Streptophyta; Embryophyta; Tracheophyta; Spermatophyta; Magnoliophyta; eudicotyledons; Gunneridae; Pentapetalae; rosids; malvids; Brassicales; Brassicaceae; Camelineae; Arabidopsis	FACE2_ARATH	350	E:1e-118	RecName: Full=CAAX prenyl protease 2;^Eukaryota; Viridiplantae; Streptophyta; Embryophyta; Tracheophyta; Spermatophyta; Magnoliophyta; eudicotyledons; Gunneridae; Pentapetalae; rosids; malvids; Brassicales; Brassicaceae; Camelineae; Arabidopsis	PF02517.15	Abi	CAAX protease self-immunity	ENOG410YPVA	RCE1 homolog, prenyl protein protease (S. cerevisiae)	.	ExpAA=146.67^PredHel=6^Topology=o27-49i70-92o156-178i199-221o225-247i254-276o	.	GO:0071586|CAAX-box protein processing;GO:0016485|protein processing	GO:0004197|cysteine-type endopeptidase activity;GO:0004175|endopeptidase activity;GO:0004222|metalloendopeptidase activity	GO:0005783|endoplasmic reticulum;GO:0030176|integral component of endoplasmic reticulum membraneGO:0016020|membrane	K08658|RCE1, FACE2; prenyl protein peptidase [EC:3.4.22.-]	map00900|Terpenoid backbone biosynthesis;map01130|Biosynthesis of antibiotics
f3p50_1705_23814	gi|566215631|ref|XM_002325195.2|	2990	E:0	Populus trichocarpa hypothetical protein (POPTR_0018s13260g) mRNA, complete cds	gi|566215632|ref|XP_002325231.2|	669	E:0	hypothetical protein POPTR_0018s13260g [Populus trichocarpa]	PECT1_ARATH	436	E:1e-146	RecName: Full=Ethanolamine-phosphate cytidylyltransferase;^Eukaryota; Viridiplantae; Streptophyta; Embryophyta; Tracheophyta; Spermatophyta; Magnoliophyta; eudicotyledons; Gunneridae; Pentapetalae; rosids; malvids; Brassicales; Brassicaceae; Camelineae; Arabidopsis	PECT1_ARATH	437	E:3e-150	RecName: Full=Ethanolamine-phosphate cytidylyltransferase;^Eukaryota; Viridiplantae; Streptophyta; Embryophyta; Tracheophyta; Spermatophyta; Magnoliophyta; eudicotyledons; Gunneridae; Pentapetalae; rosids; malvids; Brassicales; Brassicaceae; Camelineae; Arabidopsis	PF01467.25	CTP_transf_like	Cytidylyltransferase-like	COG0615	cytidylyltransferase	.	ExpAA=24.12^PredHel=1^Topology=i12-34o	.	GO:0006646|phosphatidylethanolamine biosynthetic processGO:0009058|biosynthetic process	GO:0004306|ethanolamine-phosphate cytidylyltransferase activityGO:0003824|catalytic activity	GO:0031307|integral component of mitochondrial outer membrane;GO:0005739|mitochondrion	K00967|PCYT2; ethanolamine-phosphate cytidylyltransferase [EC:2.7.7.14]	map00440|Phosphonate and phosphinate metabolism;map01100|Metabolic pathways;map00564|Glycerophospholipid metabolism
f3p60_904_31189	gi|118489053|gb|EF148361.1|	1531	E:0	Populus trichocarpa x Populus deltoides clone WS01313_M07 unknown mRNA	gi|743879664|ref|XP_011036003.1|	392	E:9e-136	PREDICTED: probable signal peptidase complex subunit 2 [Populus euphratica]	SPCS2_ARATH	321	E:5e-109	RecName: Full=Probable signal peptidase complex subunit 2;^Eukaryota; Viridiplantae; Streptophyta; Embryophyta; Tracheophyta; Spermatophyta; Magnoliophyta; eudicotyledons; Gunneridae; Pentapetalae; rosids; malvids; Brassicales; Brassicaceae; Camelineae; Arabidopsis	SPCS2_ARATH	321	E:8e-111	RecName: Full=Probable signal peptidase complex subunit 2;^Eukaryota; Viridiplantae; Streptophyta; Embryophyta; Tracheophyta; Spermatophyta; Magnoliophyta; eudicotyledons; Gunneridae; Pentapetalae; rosids; malvids; Brassicales; Brassicaceae; Camelineae; Arabidopsis	PF06703.10	SPC25	Microsomal signal peptidase 25 kDa subunit (SPC25)	ENOG4111HIK	signal peptidase complex subunit 2	.	ExpAA=41.29^PredHel=2^Topology=i48-67o77-99i	.	GO:0045047|protein targeting to ER;GO:0006465|signal peptide processingGO:0006465|signal peptide processing	GO:0008233|peptidase activityGO:0008233|peptidase activity	GO:0005783|endoplasmic reticulum;GO:0016021|integral component of membrane;GO:0031090|organelle membrane;GO:0005787|signal peptidase complexGO:0005787|signal peptidase complex;GO:0016021|integral component of membrane	K12947|SPCS2, SPC2; signal peptidase complex subunit 2 [EC:3.4.-.-]	map03060|Protein export
f2p60_1524_6971	gi|566183364|ref|XM_002312316.2|	2639	E:0	Populus trichocarpa ethanolaminephosphotransferase family protein (POPTR_0008s10930g) mRNA, complete cds	gi|224101611|ref|XP_002312352.1|	797	E:0	ethanolaminephosphotransferase family protein [Populus trichocarpa]	AAPT1_ARATH	684	E:0	RecName: Full=Choline/ethanolaminephosphotransferase 1;^Eukaryota; Viridiplantae; Streptophyta; Embryophyta; Tracheophyta; Spermatophyta; Magnoliophyta; eudicotyledons; Gunneridae; Pentapetalae; rosids; malvids; Brassicales; Brassicaceae; Camelineae; Arabidopsis	AAPT1_ARATH	684	E:0	RecName: Full=Choline/ethanolaminephosphotransferase 1;^Eukaryota; Viridiplantae; Streptophyta; Embryophyta; Tracheophyta; Spermatophyta; Magnoliophyta; eudicotyledons; Gunneridae; Pentapetalae; rosids; malvids; Brassicales; Brassicaceae; Camelineae; Arabidopsis	PF01066.20	CDP-OH_P_transf	CDP-alcohol phosphatidyltransferase	COG5050	phosphotransferase 1	.	ExpAA=183.28^PredHel=8^Topology=i37-59o141-163i176-198o218-240i253-272o287-309i321-338o348-370i	.	GO:0006646|phosphatidylethanolamine biosynthetic processGO:0008654|phospholipid biosynthetic process	GO:0004142|diacylglycerol cholinephosphotransferase activity;GO:0004307|ethanolaminephosphotransferase activity;GO:0046872|metal ion bindingGO:0016780|phosphotransferase activity, for other substituted phosphate groups	GO:0005794|Golgi apparatus;GO:0016021|integral component of membraneGO:0016020|membrane	K00993|EPT1; ethanolaminephosphotransferase [EC:2.7.8.1]	map00440|Phosphonate and phosphinate metabolism;map01100|Metabolic pathways;map01110|Biosynthesis of secondary metabolites;map00565|Ether lipid metabolism;map00564|Glycerophospholipid metabolism
f2p60_1364_26335	gi|743898564|ref|XM_011044272.1|	2237	E:0	PREDICTED: Populus euphratica syntaxin-121 (LOC105138232), mRNA	gi|566209117|ref|XP_002323377.2|	492	E:1e-170	syntaxin 121 family protein [Populus trichocarpa]	SY121_ARATH	377	E:3e-126	RecName: Full=Syntaxin-121;^Eukaryota; Viridiplantae; Streptophyta; Embryophyta; Tracheophyta; Spermatophyta; Magnoliophyta; eudicotyledons; Gunneridae; Pentapetalae; rosids; malvids; Brassicales; Brassicaceae; Camelineae; Arabidopsis	SY121_ARATH	437	E:3e-152	RecName: Full=Syntaxin-121;^Eukaryota; Viridiplantae; Streptophyta; Embryophyta; Tracheophyta; Spermatophyta; Magnoliophyta; eudicotyledons; Gunneridae; Pentapetalae; rosids; malvids; Brassicales; Brassicaceae; Camelineae; Arabidopsis	PF00804.24	Syntaxin	Syntaxin	COG5074	SYNtaxin	.	ExpAA=20.40^PredHel=1^Topology=o279-298i	.	GO:0006952|defense response;GO:0050832|defense response to fungus;GO:0006887|exocytosis;GO:0072660|maintenance of protein location in plasma membrane;GO:0031348|negative regulation of defense response;GO:0006612|protein targeting to membrane;GO:0010119|regulation of stomatal movement;GO:0009737|response to abscisic acid;GO:0009620|response to fungus;GO:0010148|transpiration;GO:0048278|vesicle doc…	GO:0043495|protein anchor;GO:0005484|SNAP receptor activity;GO:0000149|SNARE binding	GO:0009504|cell plate;GO:0016021|integral component of membrane;GO:0005886|plasma membrane;GO:0009506|plasmodesma;GO:0031201|SNARE complex;GO:0005802|trans-Golgi networkGO:0016020|membrane	K08486|STX1B_2_3; syntaxin 1B/2/3	map04721|Synaptic vesicle cycle;map04130|SNARE interactions in vesicular transport
f8p60_998_11128	gi|224057967|ref|XM_002299378.1|	1748	E:0	Populus trichocarpa photosystem I chain III family protein (POPTR_0001s11600g) mRNA, complete cds	gi|224057968|ref|XP_002299414.1|	400	E:9e-138	photosystem I chain III family protein [Populus trichocarpa]	PSAF_ARATH	308	E:9e-103	RecName: Full=Photosystem I reaction center subunit III, chloroplastic;^Eukaryota; Viridiplantae; Streptophyta; Embryophyta; Tracheophyta; Spermatophyta; Magnoliophyta; eudicotyledons; Gunneridae; Pentapetalae; rosids; malvids; Brassicales; Brassicaceae; Camelineae; Arabidopsis	PSAF_ARATH	349	E:5e-120	RecName: Full=Photosystem I reaction center subunit III, chloroplastic;^Eukaryota; Viridiplantae; Streptophyta; Embryophyta; Tracheophyta; Spermatophyta; Magnoliophyta; eudicotyledons; Gunneridae; Pentapetalae; rosids; malvids; Brassicales; Brassicaceae; Camelineae; Arabidopsis	PF02507.14	PSI_PsaF	Photosystem I reaction centre subunit III	ENOG4111JQH	photosystem i	.	ExpAA=35.32^PredHel=2^Topology=o190-212i225-247o	.	GO:0015979|photosynthesisGO:0015979|photosynthesis	GO:0019904|protein domain specific binding	GO:0009507|chloroplast;GO:0009941|chloroplast envelope;GO:0009534|chloroplast thylakoid;GO:0009535|chloroplast thylakoid membrane;GO:0016021|integral component of membrane;GO:0016020|membrane;GO:0009538|photosystem I reaction center;GO:0010287|plastoglobule;GO:0009579|thylakoidGO:0009522|photosystem I;GO:0009538|photosystem I reaction center	K02694|psaF; photosystem I subunit III	map01100|Metabolic pathways;map00195|Photosynthesis
f2p18_2649_2483	gi|566173077|ref|XM_002307618.2|	4571	E:0	Populus trichocarpa ribophorin 2 family protein (POPTR_0005s24790g) mRNA, complete cds	gi|224085660|ref|XP_002307654.1|	1122	E:0	ribophorin 2 family protein [Populus trichocarpa]	RPN2_ARATH	719	E:0	RecName: Full=Dolichyl-diphosphooligosaccharide--protein glycosyltransferase subunit 2;^Eukaryota; Viridiplantae; Streptophyta; Embryophyta; Tracheophyta; Spermatophyta; Magnoliophyta; eudicotyledons; Gunneridae; Pentapetalae; rosids; malvids; Brassicales; Brassicaceae; Camelineae; Arabidopsis	RPN2_ARATH	894	E:0	RecName: Full=Dolichyl-diphosphooligosaccharide--protein glycosyltransferase subunit 2;^Eukaryota; Viridiplantae; Streptophyta; Embryophyta; Tracheophyta; Spermatophyta; Magnoliophyta; eudicotyledons; Gunneridae; Pentapetalae; rosids; malvids; Brassicales; Brassicaceae; Camelineae; Arabidopsis	PF05817.13	Ribophorin_II	Oligosaccharyltransferase subunit Ribophorin II	ENOG410XRF2	ribophorin II	.	ExpAA=92.31^PredHel=4^Topology=i59-81o654-676i688-710o714-736i	.	GO:0006487|protein N-linked glycosylation;GO:0009409|response to coldGO:0006487|protein N-linked glycosylation	GO:0016757|transferase activity, transferring glycosyl groups	GO:0005783|endoplasmic reticulum;GO:0005794|Golgi apparatus;GO:0016021|integral component of membrane;GO:0016020|membrane;GO:0005739|mitochondrion;GO:0008250|oligosaccharyltransferase complex;GO:0009505|plant-type cell wall;GO:0005886|plasma membrane;GO:0009506|plasmodesma;GO:0005774|vacuolar membraneGO:0008250|oligosaccharyltransferase complex;GO:0016021|integral component of membrane	K12667|SWP1, RPN2; oligosaccharyltransferase complex subunit delta (ribophorin II)	map04141|Protein processing in endoplasmic reticulum;map00513|Various types of N-glycan biosynthesis;map01100|Metabolic pathways;map00510|N-Glycan biosynthesis
f2p60_1657_6153	gi|743918292|ref|XM_011004844.1|	2737	E:0	PREDICTED: Populus euphratica glycosylphosphatidylinositol anchor attachment 1 protein (LOC105109964), mRNA	gi|224060139|ref|XP_002300056.1|	914	E:0	GPI transamidase component family protein [Populus trichocarpa]	GPAA1_HUMAN	92	E:3e-18	RecName: Full=Glycosylphosphatidylinositol anchor attachment 1 protein;^Eukaryota; Metazoa; Chordata; Craniata; Vertebrata; Euteleostomi; Mammalia; Eutheria; Euarchontoglires; Primates; Haplorrhini; Catarrhini; Hominidae; Homo	GPAA1_MOUSE	99.4	E:1e-20	RecName: Full=Glycosylphosphatidylinositol anchor attachment 1 protein;^Eukaryota; Metazoa; Chordata; Craniata; Vertebrata; Euteleostomi; Mammalia; Eutheria; Euarchontoglires; Glires; Rodentia; Myomorpha; Muroidea; Muridae; Murinae; Mus; Mus	PF04114.13	Gaa1	Gaa1-like, GPI transamidase component	ENOG410XT16	glycosylphosphatidylinositol anchor attachment protein 1 homolog (yeast)	.	ExpAA=131.81^PredHel=6^Topology=i251-273o317-334i347-364o394-416i437-459o487-509i	.	GO:0016255|attachment of GPI anchor to protein;GO:0006506|GPI anchor biosynthetic process	GO:0034235|GPI anchor binding;GO:0003923|GPI-anchor transamidase activity	GO:0042765|GPI-anchor transamidase complex;GO:0005887|integral component of plasma membrane;GO:0016020|membraneGO:0016021|integral component of membrane;GO:0042765|GPI-anchor transamidase complex	K05289|GAA1; glycosylphosphatidylinositol transamidase	map00563|Glycosylphosphatidylinositol(GPI)-anchor biosynthesis;map01100|Metabolic pathways
f3p60_1405_25972	gi|118485223|gb|EF146395.1|	2499	E:0	Populus trichocarpa clone WS0117_N23 unknown mRNA	gi|224098417|ref|XP_002311166.1|	602	E:0	3-oxo-5-alpha-steroid 4-dehydrogenase family protein [Populus trichocarpa]	TECR_ARATH	513	E:4e-180	RecName: Full=Very-long-chain enoyl-CoA reductase {ECO:0000305};^Eukaryota; Viridiplantae; Streptophyta; Embryophyta; Tracheophyta; Spermatophyta; Magnoliophyta; eudicotyledons; Gunneridae; Pentapetalae; rosids; malvids; Brassicales; Brassicaceae; Camelineae; Arabidopsis	TECR_ARATH	550	E:0	RecName: Full=Very-long-chain enoyl-CoA reductase {ECO:0000305};^Eukaryota; Viridiplantae; Streptophyta; Embryophyta; Tracheophyta; Spermatophyta; Magnoliophyta; eudicotyledons; Gunneridae; Pentapetalae; rosids; malvids; Brassicales; Brassicaceae; Camelineae; Arabidopsis	PF02544.15	Steroid_dh	3-oxo-5-alpha-steroid 4-dehydrogenase	ENOG410XR2S	Trans-2,3-enoyl-CoA	.	ExpAA=122.03^PredHel=6^Topology=i94-116o126-143i164-183o198-220i233-255o259-281i	.	GO:0042335|cuticle development;GO:0006665|sphingolipid metabolic process;GO:0010091|trichome branching;GO:1905499|trichome papilla formation;GO:0042761|very long-chain fatty acid biosynthetic process;GO:0010025|wax biosynthetic processGO:0006629|lipid metabolic process	GO:0009922|fatty acid elongase activity;GO:0016627|oxidoreductase activity, acting on the CH-CH group of donorsGO:0016627|oxidoreductase activity, acting on the CH-CH group of donors	GO:0005783|endoplasmic reticulum;GO:0005789|endoplasmic reticulum membrane;GO:0009923|fatty acid elongase complex;GO:0016021|integral component of membrane;GO:0005886|plasma membraneGO:0005737|cytoplasm;GO:0016021|integral component of membrane	K10258|TER, TSC13, CER10; very-long-chain enoyl-CoA reductase [EC:1.3.1.93]	map00062|Fatty acid elongation;map01212|Fatty acid metabolism;map01110|Biosynthesis of secondary metabolites;map01040|Biosynthesis of unsaturated fatty acids
f2p60_1523_6933	gi|566157905|ref|XM_002302455.2|	2553	E:0	Populus trichocarpa hypothetical protein (POPTR_0002s13810g) mRNA, complete cds	gi|566157906|ref|XP_002302491.2|	696	E:0	hypothetical protein POPTR_0002s13810g [Populus trichocarpa]	PPT1_CAEEL	179	E:4e-50	RecName: Full=Palmitoyl-protein thioesterase 1;^Eukaryota; Metazoa; Ecdysozoa; Nematoda; Chromadorea; Rhabditida; Rhabditoidea; Rhabditidae; Peloderinae; Caenorhabditis	PPT1_CAEEL	179	E:8e-52	RecName: Full=Palmitoyl-protein thioesterase 1;^Eukaryota; Metazoa; Ecdysozoa; Nematoda; Chromadorea; Rhabditida; Rhabditoidea; Rhabditidae; Peloderinae; Caenorhabditis	PF02089.14	Palm_thioest	Palmitoyl protein thioesterase	COG1075	Triacylglycerol Lipase	.	ExpAA=31.79^PredHel=1^Topology=o15-37i	.	GO:0044257|cellular protein catabolic process;GO:0007005|mitochondrion organization;GO:0018991|oviposition;GO:0009791|post-embryonic development;GO:0002084|protein depalmitoylation;GO:0006898|receptor-mediated endocytosis	GO:0008474|palmitoyl-(protein) hydrolase activityGO:0098599|palmitoyl hydrolase activity	GO:0005764|lysosome	K01074|PPT; palmitoyl-protein thioesterase [EC:3.1.2.22]	map00062|Fatty acid elongation;map01100|Metabolic pathways;map04142|Lysosome;map01212|Fatty acid metabolism
f2p60_1697_23846	gi|743907645|ref|XM_011048952.1|	2593	E:0	PREDICTED: Populus euphratica 5'-adenylylsulfate reductase 3, chloroplastic-like (LOC105141663), transcript variant X1, mRNA	gi|743907646|ref|XP_011047254.1|	747	E:0	PREDICTED: 5'-adenylylsulfate reductase 3, chloroplastic-like isoform X1 [Populus euphratica]	APR3_ARATH	355	E:1e-114	RecName: Full=5'-adenylylsulfate reductase 3, chloroplastic;^Eukaryota; Viridiplantae; Streptophyta; Embryophyta; Tracheophyta; Spermatophyta; Magnoliophyta; eudicotyledons; Gunneridae; Pentapetalae; rosids; malvids; Brassicales; Brassicaceae; Camelineae; Arabidopsis	APR3_ARATH	384	E:3e-128	RecName: Full=5'-adenylylsulfate reductase 3, chloroplastic;^Eukaryota; Viridiplantae; Streptophyta; Embryophyta; Tracheophyta; Spermatophyta; Magnoliophyta; eudicotyledons; Gunneridae; Pentapetalae; rosids; malvids; Brassicales; Brassicaceae; Camelineae; Arabidopsis	PF01507.18	PAPS_reduct	Phosphoadenosine phosphosulfate reductase family	COG0175	Reduction of activated sulfate into sulfite (By similarity)	.	ExpAA=15.43^PredHel=1^Topology=i21-43o	.	GO:0045454|cell redox homeostasis;GO:0019344|cysteine biosynthetic process;GO:0000103|sulfate assimilation;GO:0019419|sulfate reductionGO:0008152|metabolic process	GO:0051539|4 iron, 4 sulfur cluster binding;GO:0033741|adenylyl-sulfate reductase (glutathione) activity;GO:0009973|adenylyl-sulfate reductase activity;GO:0046872|metal ion binding;GO:0004604|phosphoadenylyl-sulfate reductase (thioredoxin) activityGO:0003824|catalytic activity	GO:0009507|chloroplast	K05907|APR; adenylyl-sulfate reductase (glutathione) [EC:1.8.4.9]	map00920|Sulfur metabolism;map01120|Microbial metabolism in diverse environments
f3p60_2697_2279	gi|743879256|ref|XM_011037572.1|	4612	E:0	PREDICTED: Populus euphratica cytosolic endo-beta-N-acetylglucosaminidase-like (LOC105133538), transcript variant X1, mRNA	gi|743879257|ref|XP_011035874.1|	1580	E:0	PREDICTED: cytosolic endo-beta-N-acetylglucosaminidase-like isoform X1 [Populus euphratica]	ENAS1_ARATH	771	E:0	RecName: Full=Cytosolic endo-beta-N-acetylglucosaminidase 1 {ECO:0000305};^Eukaryota; Viridiplantae; Streptophyta; Embryophyta; Tracheophyta; Spermatophyta; Magnoliophyta; eudicotyledons; Gunneridae; Pentapetalae; rosids; malvids; Brassicales; Brassicaceae; Camelineae; Arabidopsis	ENAS1_ARATH	780	E:0	RecName: Full=Cytosolic endo-beta-N-acetylglucosaminidase 1 {ECO:0000305};^Eukaryota; Viridiplantae; Streptophyta; Embryophyta; Tracheophyta; Spermatophyta; Magnoliophyta; eudicotyledons; Gunneridae; Pentapetalae; rosids; malvids; Brassicales; Brassicaceae; Camelineae; Arabidopsis	PF03644.12	Glyco_hydro_85	Glycosyl hydrolase family 85	COG4724	endo-beta-n-acetylglucosaminidase	.	ExpAA=20.51^PredHel=1^Topology=o776-798i	.	GO:0006491|N-glycan processing;GO:0006517|protein deglycosylation	GO:0033925|mannosyl-glycoprotein endo-beta-N-acetylglucosaminidase activityGO:0033925|mannosyl-glycoprotein endo-beta-N-acetylglucosaminidase activity	GO:0005737|cytoplasm;GO:0005829|cytosol;GO:0005773|vacuoleGO:0005737|cytoplasm	K01227|E3.2.1.96; mannosyl-glycoprotein endo-beta-N-acetylglucosaminidase [EC:3.2.1.96]	map00511|Other glycan degradation
[truncated: 13,888 more rows]
