# Supplementary material for: Characterization of the Gene Expression Profile Response to Drought Stress in Populus ussuriensis Using PacBio SMRT and Illumina Sequencing
Source: Int J Mol Sci. 2022 Mar 30;23(7):3840. doi: 10.3390/ijms23073840 (PMC8998571; doi:10.3390/ijms23073840)
Supplement: Supplementary file 1 [file ijms-23-03840-s001.zip › Table S6.xls]

## Sheet: Sheet1
Table S6 Identification of DEGs in Populus ussuriensis
geneID	6h Log2FoldChange	pval	Up/Down	Significant	12h Log2FoldChange	pval	Up/Down	Significant	24h Log2FoldChange	pval	Up/Down	Significant	48h Log2FoldChange	pval	Up/Down	Significant	120h Log2FoldChange	pval	Up/Down	Significant	Prot_ID	Prot_Coords	NT_TopHit	NT_Score	NT_Evalue	NT_Description	NR_TopHit	NR_Score	NR_Evalue	NR_Description	BLASTX_Sprot_TopHit	BLASTX_Score	BLASTX_Evalue	BLASTX_Description	BLASTP_Sprot_TopHit	BLASTP_Score	BLASTP_Evalue	BLASTP_Description	PFAM_TopHit	PFAM_Name	PFAM_Description	eggNOG_TopHit	eggNOG_Description	SignalP	TmHMM	RNAMMER	GO_biological_process	GO_molecular_function	GO_cellular_component
f9p60_914_11928	5.23312	0	up	yes	4.82029	0	up	yes	4.57196	0	up	yes	2.99597	8.74331e-282	up	yes	1.47379	2.25042e-28	up	yes	Gene.6606::PuPacbio_f9p60_914_transcript11928_g1::g.6606::m.6606	2-547[+]	gi|224107866|ref|XM_002314597.1|	1131	E:0	Populus trichocarpa hypothetical protein (POPTR_0010s08290g) mRNA, complete cds	.	.	.	.	.	.	.	.	PRP33_DAUCA	90.9	E:4e-21	RecName: Full=Proline-rich 33 kDa extensin-related protein;^Eukaryota; Viridiplantae; Streptophyta; Embryophyta; Tracheophyta; Spermatophyta; Magnoliophyta; eudicotyledons; Gunneridae; Pentapetalae; asterids; campanulids; Apiales; Apiaceae; Apioideae; Scandiceae; Daucinae; Daucus; Daucus sect. Daucus	PF02095.14	Extensin_1	Extensin-like protein repeat	.	.	.	ExpAA=20.40^PredHel=1^Topology=i12-31o	.	.	GO:0005199|structural constituent of cell wallGO:0005199|structural constituent of cell wall	GO:0005618|cell wall;GO:0005576|extracellular region
f9p60_754_33172	-1.15025	5.19693e-45	down	yes	-0.748609	3.05495e-20	down	no	-0.582463	5.66196e-14	down	no	-0.387979	3.5844e-05	down	no	0.0168868	0.86471	up	no	Gene.16035::PuPacbio_f9p60_754_transcript33172_g1::g.16035::m.16035	3-488[+]	gi|566191855|ref|XM_002315164.2|	1026	E:0	Populus trichocarpa hypothetical protein (POPTR_0010s20560g) mRNA, complete cds	gi|566191856|ref|XP_002315200.2|	161	E:9e-47	hypothetical protein POPTR_0010s20560g [Populus trichocarpa]	.	.	.	.	.	.	.	.	.	.	.	.	.	.	.	.	.	.	.
f8p60_612_35290	2.05089	1.56391e-62	up	yes	0.919286	2.29718e-11	up	no	0.33354	0.0471176	up	no	-0.249069	0.127395	down	no	-0.232712	0.201767	down	no	Gene.16513::PuPacbio_f8p60_612_transcript35290_g2::g.16513::m.16513	1-471[+]	gi|743921210|ref|XM_011006364.1|	706	E:0	PREDICTED: Populus euphratica phosphopantothenoylcysteine decarboxylase subunit VHS3 (LOC105111106), mRNA	gi|743921211|ref|XP_011004666.1|	156	E:3e-45	PREDICTED: phosphopantothenoylcysteine decarboxylase subunit VHS3 [Populus euphratica]	.	.	.	.	.	.	.	.	.	.	.	.	.	.	.	.	.	.	.
f8p60_602_15086	0.520551	0.263261	up	no	1.8276	5.31079e-07	up	yes	1.19201	0.000551027	up	yes	0.748868	0.0195496	up	no	0.890855	0.00495096	up	no	.	.	gi|566148789|ref|XM_002299282.2|	972	E:0	Populus trichocarpa hypothetical protein (POPTR_0001s13640g) mRNA, complete cds	gi|224057776|ref|XP_002299318.1|	144	E:1e-41	hypothetical protein POPTR_0001s13640g [Populus trichocarpa]	.	.	.	.	.	.	.	.	.	.	.	.	.	.	.	.	.	.	.
f8p60_232_17495	1.13062	0.0249755	up	yes	1.32665	0.00421701	up	yes	0.616102	0.117985	up	no	0.100973	0.745845	up	no	0.265605	0.419416	up	no	.	.	gi|743919217|ref|XM_011005325.1|	276	E:3e-71	PREDICTED: Populus euphratica adenosylhomocysteinase (LOC105110326), mRNA	.	.	.	.	.	.	.	.	.	.	.	.	.	.	.	.	.	.	.	.	.	.	.
f7p60_452_36952	-0.0903175	0.836165	down	no	-0.0685682	0.86981	down	no	-1.60567	4.53788e-05	down	yes	-1.0265	0.00221688	down	yes	-0.487195	0.141578	down	no	Gene.16650::PuPacbio_f7p60_452_transcript36952_g1::g.16650::m.16650	2-301[+]	gi|566198102|ref|XM_002318758.2|	588	E:6e-165	Populus trichocarpa hypothetical protein (POPTR_0012s12140g) mRNA, complete cds	gi|566198103|ref|XP_002318794.2|	103	E:5e-26	hypothetical protein POPTR_0012s12140g [Populus trichocarpa]	.	.	.	.	.	.	.	.	.	.	.	.	.	.	.	.	.	.	.
f6p60_624_35012	-1.03779	8.22613e-34	down	yes	0.16658	0.0220022	up	no	0.320891	0.000641732	up	no	-0.123163	0.696614	down	no	-0.674769	7.29299e-14	down	no	Gene.16473::PuPacbio_f6p60_624_transcript35012_g1::g.16473::m.16473	101-445[+]	gi|566179393|ref|XM_006380289.1|	1048	E:0	Populus trichocarpa hypothetical protein (POPTR_0007s03370g) mRNA, complete cds	gi|566215813|ref|XP_006372201.1|	77	E:3e-15	hypothetical protein POPTR_0018s14260g, partial [Populus trichocarpa]	.	.	.	.	ESPE_MYCTU	46.2	E:1e-05	RecName: Full=ESX-1 secretion-associated protein EspE {ECO:0000305};^Bacteria; Actinobacteria; Corynebacteriales; Mycobacteriaceae; Mycobacterium; Mycobacterium tuberculosis complex	.	.	.	.	.	.	.	.	GO:0044117|growth of symbiont in host	.	GO:0016021|integral component of membrane;GO:0005886|plasma membrane
f6p60_239_39607	-1.25465	0.0192017	down	yes	-0.749588	0.125235	down	no	-0.107744	0.777004	down	no	-0.0427962	0.898643	down	no	0.122516	0.712352	up	no	.	.	gi|743861935|ref|XR_843236.1|	292	E:3e-76	PREDICTED: Populus euphratica uncharacterized LOC105130439 (LOC105130439), ncRNA	gi|590641233|ref|XP_007030175.1|	94.7	E:9e-24	Vacuolar ATP synthase catalytic subunit-related / V-ATPase-related / vacuolar proton pump-related [Theobroma cacao]	.	.	.	.	.	.	.	.	.	.	.	.	.	.	.	.	.	.	.
f6p60_1064_29342	-1.55339	7.88179e-88	down	yes	-0.531538	1.07632e-17	down	no	-0.489901	2.63781e-08	down	no	-1.72642	7.44653e-09	down	yes	-2.82267	2.53584e-154	down	yes	Gene.14554::PuPacbio_f6p60_1064_transcript29342_g1::g.14554::m.14554	1-681[+]	gi|743911864|ref|XM_011001495.1|	784	E:0	PREDICTED: Populus euphratica extensin-3 (LOC105107537), transcript variant X4, mRNA	gi|566156668|ref|XP_006386317.1|	53.1	E:6e-06	hypothetical protein POPTR_0002s070802g, partial [Populus trichocarpa]	.	.	.	.	EXTN3_ARATH	70.1	E:1e-12	RecName: Full=Extensin-3 {ECO:0000303|PubMed:11475326};^Eukaryota; Viridiplantae; Streptophyta; Embryophyta; Tracheophyta; Spermatophyta; Magnoliophyta; eudicotyledons; Gunneridae; Pentapetalae; rosids; malvids; Brassicales; Brassicaceae; Camelineae; Arabidopsis	PF04554.12	Extensin_2	Extensin-like region	ENOG41104BK	Extensin-like region	.	ExpAA=16.04^PredHel=1^Topology=i13-35o	.	GO:0009664|plant-type cell wall organizationGO:0009664|plant-type cell wall organization	GO:0005199|structural constituent of cell wallGO:0005199|structural constituent of cell wall	GO:0005576|extracellular region;GO:0009530|primary cell wall
f5p60_949_11465	-1.23237	0.000101316	down	yes	-1.91672	9.41457e-11	down	yes	-0.662559	0.00681172	down	no	-0.795813	0.0120358	down	no	-1.74553	9.75788e-11	down	yes	Gene.6433::PuPacbio_f5p60_949_transcript11465_g1::g.6433::m.6433	182-742[+]	gi|566203851|ref|XM_002320948.2|	1616	E:0	Populus trichocarpa hypothetical protein (POPTR_0014s11850g) mRNA, complete cds	gi|224131030|ref|XP_002320984.1|	343	E:2e-116	hypothetical protein POPTR_0014s11850g [Populus trichocarpa]	.	.	.	.	.	.	.	.	PF05553.10	DUF761	Cotton fibre expressed protein	.	.	.	.	.	.	.	.
f5p60_932_30819	-1.15674	1.88699e-37	down	yes	-0.904941	3.44539e-25	down	no	-0.420552	1.09469e-06	down	no	-0.921865	3.21988e-15	down	no	-0.846607	1.32738e-24	down	no	Gene.15145::PuPacbio_f5p60_932_transcript30819_g2::g.15145::m.15145	3-686[+]	gi|566170064|ref|XM_002307053.2|	1594	E:0	Populus trichocarpa hypothetical protein (POPTR_0005s07760g) mRNA, complete cds	gi|566170065|ref|XP_002307089.2|	402	E:4e-139	hypothetical protein POPTR_0005s07760g [Populus trichocarpa]	.	.	.	.	.	.	.	.	PF00168.29	C2	C2 domain	.	.	.	.	.	.	.	.
f5p60_791_32911	-1.44546	5.77624e-47	down	yes	-0.974137	9.2301e-31	down	no	-0.95326	2.33436e-25	down	no	-0.676868	1.20286e-09	down	no	-0.345883	0.00406996	down	no	Gene.15941::PuPacbio_f5p60_791_transcript32911_g2::g.15941::m.15941	1-435[+]	gi|566191855|ref|XM_002315164.2|	1110	E:0	Populus trichocarpa hypothetical protein (POPTR_0010s20560g) mRNA, complete cds	gi|566191856|ref|XP_002315200.2|	160	E:2e-46	hypothetical protein POPTR_0010s20560g [Populus trichocarpa]	.	.	.	.	.	.	.	.	.	.	.	.	.	.	.	.	.	.	.
f5p60_685_33964	-1.32072	1.35879e-25	down	yes	-1.21627	7.74849e-25	down	yes	-0.838648	6.10232e-12	down	no	-0.199856	NA	down	no	0.103855	0.389871	up	no	Gene.16251::PuPacbio_f5p60_685_transcript33964_g1::g.16251::m.16251	2-355[+]	gi|566166799|ref|XM_002305386.2|	1177	E:0	Populus trichocarpa hypothetical protein (POPTR_0004s16060g) mRNA, complete cds	gi|224077820|ref|XP_002305422.1|	177	E:1e-53	hypothetical protein POPTR_0004s16060g [Populus trichocarpa]	.	.	.	.	.	.	.	.	PF10950.7	Organ_specific	Organ specific protein	.	.	.	ExpAA=16.98^PredHel=1^Topology=i13-32o	.	.	.	.
f5p60_642_34607	-0.450761	4.11328e-08	down	no	-0.837812	4.50514e-17	down	no	-1.11825	7.13134e-17	down	yes	-0.706651	2.44351e-08	down	no	-1.01065	3.26487e-12	down	yes	.	.	gi|118482031|gb|EF144728.1|	1088	E:0	Populus trichocarpa clone WS01117_I01 unknown mRNA	gi|224066609|ref|XP_002302161.1|	151	E:1e-43	hypothetical protein POPTR_0002s06580g [Populus trichocarpa]	.	.	.	.	.	.	.	.	.	.	.	.	.	.	.	.	.	.	.
f5p60_588_15215	2.03661	3.22523e-07	up	yes	2.9955	1.24109e-19	up	yes	2.66374	3.53576e-18	up	yes	0.889193	0.00816599	up	no	0.109139	0.74274	up	no	Gene.7473::PuPacbio_f5p60_588_transcript15215_g1::g.7473::m.7473	102-407[+]	gi|566207759|ref|XM_006374639.1|	917	E:0	Populus trichocarpa hypothetical protein (POPTR_0015s15440g) mRNA, complete cds	gi|743912641|ref|XP_011000207.1|	56.6	E:3e-08	PREDICTED: cysteine-rich and transmembrane domain-containing protein A-like [Populus euphratica]	.	.	.	.	.	.	.	.	.	.	.	.	.	.	.	.	.	.	.
f5p60_456_16103	0.0788148	0.696403	up	no	-0.299885	0.10526	down	no	-0.440144	0.0195682	down	no	-0.782788	6.84075e-05	down	no	-1.33474	1.79891e-10	down	yes	Gene.7548::PuPacbio_f5p60_456_transcript16103_g1::g.7548::m.7548	3-305[+]	gi|566198102|ref|XM_002318758.2|	730	E:0	Populus trichocarpa hypothetical protein (POPTR_0012s12140g) mRNA, complete cds	gi|566198103|ref|XP_002318794.2|	136	E:6e-39	hypothetical protein POPTR_0012s12140g [Populus trichocarpa]	.	.	.	.	.	.	.	.	.	.	.	.	.	.	.	.	.	.	.
f5p60_273_17305	1.71	1.24393e-21	up	yes	1.31633	3.3031e-12	up	yes	0.977145	1.36199e-07	up	no	0.790916	7.84201e-05	up	no	1.04396	8.49133e-07	up	yes	.	.	gi|166091645|gb|AC216914.1|	246	E:3e-62	Populus trichocarpa clone POP036-E01, complete sequence	gi|566199675|ref|XP_006375910.1|	69.7	E:3e-13	hypothetical protein POPTR_0013s05890g [Populus trichocarpa]	.	.	.	.	.	.	.	.	.	.	.	.	.	.	.	.	.	.	.
f5p60_255_39309	2.11035	3.10195e-06	up	yes	0.584616	0.256242	up	no	0.425533	0.280419	up	no	0.18505	0.571602	up	no	-0.00304708	0.992351	down	no	.	.	gi|118488253|gb|EF147949.1|	353	E:1e-94	Populus trichocarpa clone WS0126_C24 unknown mRNA	.	.	.	.	.	.	.	.	.	.	.	.	.	.	.	.	.	.	.	.	.	.	.
f5p60_244_17355	1.67868	0.000744098	up	yes	1.99027	1.37906e-05	up	yes	0.630596	0.0965011	up	no	0.868491	0.00957369	up	no	0.259705	0.397429	up	no	.	.	gi|566195267|ref|XM_002316917.2|	383	E:2e-103	Populus trichocarpa FLAVODOXIN-LIKE QUINONE REDUCTASE 1 family protein (POPTR_0011s13310g) mRNA, complete cds	.	.	.	.	.	.	.	.	.	.	.	.	.	.	.	.	.	.	.	.	.	.	.
f4p60_914_11906	-1.04894	5.46298e-55	down	yes	0.0935153	0.100013	up	no	-0.572611	3.15431e-13	down	no	-0.568123	0.0858082	down	no	-1.63807	3.60698e-107	down	yes	.	.	gi|743867195|ref|XM_011034365.1|	1426	E:0	PREDICTED: Populus euphratica non-specific lipid-transfer protein-like protein At2g13820 (LOC105131410), mRNA	gi|224085501|ref|XP_002307597.1|	262	E:3e-84	protease inhibitor/seed storage/lipid transfer family protein [Populus trichocarpa]	.	.	.	.	.	.	.	.	.	.	.	.	.	.	.	.	.	.	.
f4p60_800_32513	2.08021	1.21136e-09	up	yes	1.24421	0.00104218	up	yes	1.47612	5.50669e-06	up	yes	0.716125	0.022125	up	no	0.224447	0.488416	up	no	Gene.15813::PuPacbio_f4p60_800_transcript32513_g3::g.15813::m.15813	2-544[+]	gi|155029564|gb|AC208046.1|	1341	E:0	Populus trichocarpa clone JGIACSB05-D15, complete sequence	gi|566159520|ref|XP_006386839.1|	312	E:3e-105	hypothetical protein POPTR_0002s22930g [Populus trichocarpa]	.	.	.	.	.	.	.	.	.	.	.	.	.	.	.	.	.	.	.
f4p60_784_32725	-2.10945	2.54102e-122	down	yes	-1.34794	4.7704e-62	down	yes	-0.267625	0.0217782	down	no	-0.358005	4.76968e-05	down	no	-0.290895	0.000512159	down	no	.	.	gi|566156628|ref|XM_006386248.1|	1068	E:0	Populus trichocarpa hypothetical protein (POPTR_0002s06870g) mRNA, complete cds	gi|566156629|ref|XP_006386310.1|	132	E:5e-36	hypothetical protein POPTR_0002s06870g [Populus trichocarpa]	.	.	.	.	.	.	.	.	.	.	.	.	.	.	.	.	.	.	.
f4p60_784_13137	9.65137	3.48159e-149	up	yes	9.72807	7.03455e-167	up	yes	7.65504	1.07943e-152	up	yes	2.09055	NA	up	no	3.89561	3.78591e-36	up	yes	Gene.6979::PuPacbio_f4p60_784_transcript13137_g1::g.6979::m.6979	1-582[+]	gi|743794327|ref|XM_011001677.1|	1295	E:0	PREDICTED: Populus euphratica uncharacterized LOC105107662 (LOC105107662), mRNA	gi|743794328|ref|XP_010999979.1|	363	E:1e-124	PREDICTED: uncharacterized protein LOC105107662 [Populus euphratica]	.	.	.	.	.	.	.	.	.	.	.	.	.	.	ExpAA=19.67^PredHel=1^Topology=o27-46i	.	.	.	.
f4p60_775_13158	-0.505228	2.57825e-09	down	no	1.09204	8.25294e-64	up	yes	0.105765	0.255904	up	no	-0.228829	NA	down	no	-0.899967	5.2459e-20	down	no	.	.	gi|566212010|ref|XM_006372972.1|	606	E:3e-170	Populus trichocarpa hypothetical protein (POPTR_0017s07470g) mRNA, complete cds	.	.	.	.	.	.	.	.	.	.	.	.	.	.	.	.	.	.	.	.	.	.	.
f4p60_691_33910	-1.16709	2.68089e-23	down	yes	-1.77977	4.90819e-52	down	yes	-0.786643	1.48625e-13	down	no	-0.904948	1.4027e-05	down	no	-0.576126	0.000289935	down	no	Gene.16232::PuPacbio_f4p60_691_transcript33910_g3::g.16232::m.16232	3-395[+]	gi|566173984|ref|XM_002307872.2|	955	E:0	Populus trichocarpa hypothetical protein (POPTR_0006s01870g) mRNA, complete cds	gi|566173985|ref|XP_002307908.2|	224	E:6e-72	hypothetical protein POPTR_0006s01870g [Populus trichocarpa]	.	.	.	.	.	.	.	.	.	.	.	.	.	.	.	.	.	.	.
f4p60_664_34298	3.02453	1.42683e-12	up	yes	2.81343	1.53327e-11	up	yes	1.53545	7.09249e-05	up	yes	0.813093	0.0143125	up	no	0.45899	0.154234	up	no	.	.	gi|743927965|ref|XR_839998.1|	904	E:0	PREDICTED: Populus euphratica uncharacterized LOC105113624 (LOC105113624), ncRNA	gi|566239171|ref|XP_006371412.1|	142	E:6e-41	hypothetical protein POPTR_0019s09970g [Populus trichocarpa]	.	.	.	.	.	.	.	.	.	.	.	.	.	.	.	.	.	.	.
f4p60_636_34689	-0.988848	4.31399e-44	down	no	0.782092	1.27983e-40	up	no	-0.280116	0.000271781	down	no	-0.424476	0.170768	down	no	-1.18825	5.24089e-50	down	yes	.	.	gi|157410312|gb|AC210551.1|	1029	E:0	Populus trichocarpa clone POP049-I23, complete sequence	gi|566211988|ref|XP_006373027.1|	53.9	E:5e-07	hypothetical protein POPTR_0017s07340g, partial [Populus trichocarpa]	.	.	.	.	.	.	.	.	.	.	.	.	.	.	.	.	.	.	.
f4p60_631_34720	1.31391	5.29894e-21	up	yes	0.766973	5.21948e-08	up	no	0.57332	0.000146633	up	no	0.576388	0.00114514	up	no	0.365677	0.0309388	up	no	.	.	gi|566151731|ref|XM_002300246.2|	1033	E:0	Populus trichocarpa hypothetical protein (POPTR_0001s29750g) mRNA, complete cds	gi|224060879|ref|XP_002300282.1|	99.4	E:4e-24	hypothetical protein POPTR_0001s29750g [Populus trichocarpa]	.	.	.	.	.	.	.	.	.	.	.	.	.	.	.	.	.	.	.
f4p60_622_14706	-1.8925	3.52493e-55	down	yes	-0.253478	0.00500528	down	no	0.489526	4.48713e-07	up	no	0.496712	NA	up	no	0.725528	7.51052e-08	up	no	.	.	gi|118489588|gb|EF148634.1|	682	E:0	Populus trichocarpa x Populus deltoides clone WS0135_G16 unknown mRNA	gi|118489589|gb|ABK96596.1|	122	E:3e-32	unknown [Populus trichocarpa x Populus deltoides]	.	.	.	.	.	.	.	.	.	.	.	.	.	.	.	.	.	.	.
f4p60_578_35326	-1.56799	6.58239e-38	down	yes	-0.851278	6.81469e-22	down	no	0.0153174	0.881726	up	no	-0.209552	0.0197907	down	no	0.326862	0.0105774	up	no	.	.	gi|118484322|gb|EF145927.1|	819	E:0	Populus trichocarpa clone WS0114_F09 unknown mRNA	gi|118484323|gb|ABK94039.1|	72.8	E:2e-14	unknown [Populus trichocarpa]	.	.	.	.	.	.	.	.	.	.	.	.	.	.	.	.	.	.	.
f4p60_572_35622	1.23118	3.01243e-22	up	yes	0.6542	2.45421e-09	up	no	0.780965	6.09946e-10	up	no	0.357366	0.0689959	up	no	0.461709	0.0434886	up	no	Gene.16555::PuPacbio_f4p60_572_transcript35622_g2::g.16555::m.16555	1-327[-]	gi|743919608|ref|XM_011005528.1|	597	E:1e-167	PREDICTED: Populus euphratica pre-mRNA polyadenylation factor fip-1-like (LOC105110473), transcript variant X1, mRNA	gi|566199152|ref|XP_006375793.1|	147	E:1e-42	hypothetical protein POPTR_0013s03225g [Populus trichocarpa]	.	.	.	.	.	.	.	.	.	.	.	.	.	.	.	.	.	.	.
f4p60_533_37100	-1.65743	5.9686e-10	down	yes	-0.460739	0.0357134	down	no	-0.892042	9.19473e-05	down	no	-0.316771	0.251318	down	no	-0.24666	0.241533	down	no	.	.	gi|118488860|gb|EF148262.1|	651	E:0	Populus trichocarpa x Populus deltoides clone WS01312_E11 unknown mRNA	gi|118488861|gb|ABK96240.1|	168	E:5e-51	unknown [Populus trichocarpa x Populus deltoides]	.	.	.	.	.	.	.	.	.	.	.	.	.	.	.	.	.	.	.
f4p60_507_36396	0.604221	0.00743593	up	no	1.25337	4.52605e-11	up	yes	0.69169	0.00100611	up	no	0.651142	0.00310152	up	no	0.536009	0.011131	up	no	.	.	gi|566202158|ref|XM_006374892.1|	782	E:0	Populus trichocarpa hypothetical protein (POPTR_0014s03060g) mRNA, complete cds	gi|566202159|ref|XP_006374954.1|	140	E:4e-40	hypothetical protein POPTR_0014s03060g [Populus trichocarpa]	.	.	.	.	.	.	.	.	.	.	.	.	.	.	.	.	.	.	.
f4p60_486_36691	-0.440843	0.067689	down	no	0.0105431	0.96091	up	no	-0.556248	0.0203949	down	no	-1.21927	1.76269e-06	down	yes	-1.95073	3.36148e-13	down	yes	.	.	gi|743939762|ref|XR_840900.1|	760	E:0	PREDICTED: Populus euphratica uncharacterized LOC105118150 (LOC105118150), ncRNA	.	.	.	.	.	.	.	.	.	.	.	.	.	.	.	.	.	.	.	.	.	.	.
f4p60_439_37157	-1.01468	0.0103485	down	yes	-0.944627	0.0122384	down	no	-0.99956	0.00328565	down	no	-0.843744	0.0106576	down	no	-0.892505	0.00587397	down	no	.	.	gi|566255261|ref|XM_006387679.1|	584	E:8e-164	Populus trichocarpa hypothetical protein (POPTR_0626s00200g) mRNA, complete cds	gi|743783775|ref|XP_011020616.1|	103	E:2e-26	PREDICTED: uncharacterized protein LOC105122928 [Populus euphratica]	.	.	.	.	.	.	.	.	.	.	.	.	.	.	.	.	.	.	.
f4p60_387_37696	-1.62191	6.59676e-18	down	yes	-0.893945	4.67472e-26	down	no	-0.100846	0.33657	down	no	-0.190529	NA	down	no	0.216778	0.112023	up	no	.	.	gi|118489470|gb|EF148574.1|	623	E:1e-175	Populus trichocarpa x Populus deltoides clone WS0134_F01 unknown mRNA	gi|118484323|gb|ABK94039.1|	72.8	E:5e-15	unknown [Populus trichocarpa]	.	.	.	.	.	.	.	.	.	.	.	.	.	.	.	.	.	.	.
f4p60_327_38643	1.36761	0.0108477	up	yes	0.723646	0.173737	up	no	0.335973	0.372235	up	no	-0.0714128	0.796708	down	no	-0.0347145	0.893906	down	no	.	.	gi|118481285|gb|EF144342.1|	405	E:5e-110	Populus trichocarpa clone PX0015_N21	.	.	.	.	.	.	.	.	.	.	.	.	.	.	.	.	.	.	.	.	.	.	.
f4p60_1229_9251	-0.0417274	0.577513	down	no	1.48104	2.52879e-152	up	yes	0.139663	0.176314	up	no	-0.643638	0.0259628	down	no	-1.34604	1.23378e-06	down	yes	Gene.5550::PuPacbio_f4p60_1229_transcript9251_g1::g.5550::m.5550	2-898[+]	gi|566163719|ref|XM_006385957.1|	806	E:0	Populus trichocarpa hypothetical protein (POPTR_0003s20340g) mRNA, partial cds	gi|743886935|ref|XP_011037985.1|	93.2	E:8e-18	PREDICTED: uncharacterized protein LOC105135011 [Populus euphratica]	.	.	.	.	.	.	.	.	.	.	.	.	.	.	ExpAA=20.18^PredHel=1^Topology=i13-35o	.	.	.	.
f4p60_1109_28901	-0.499442	4.92218e-08	down	no	0.393092	2.02366e-07	up	no	0.296693	0.000523225	up	no	0.796145	1.86205e-27	up	no	1.04089	7.36079e-11	up	yes	Gene.14361::PuPacbio_f4p60_1109_transcript28901_g2::g.14361::m.14361	77-901[+]	gi|118487788|gb|EF147712.1|	1973	E:0	Populus trichocarpa clone WS0124_H17 unknown mRNA	gi|566203457|ref|XP_002320215.2|	443	E:2e-153	hypothetical protein POPTR_0014s09800g [Populus trichocarpa]	.	.	.	.	.	.	.	.	PF13301.5	DUF4079	Protein of unknown function (DUF4079)	.	.	.	ExpAA=87.40^PredHel=4^Topology=o93-115i177-199o209-231i243-265o	.	.	.	.
f4p60_1093_10489	1.23398	0.00350634	up	yes	1.04962	0.0103448	up	yes	0.317974	0.398648	up	no	0.252536	0.448577	up	no	0.305312	0.357565	up	no	Gene.6082::PuPacbio_f4p60_1093_transcript10489_g1::g.6082::m.6082	232-666[+]	gi|743870867|ref|XM_011035396.1|	1598	E:0	PREDICTED: Populus euphratica uncharacterized LOC105132099 (LOC105132099), mRNA	gi|743870868|ref|XP_011033698.1|	207	E:8e-87	PREDICTED: uncharacterized protein LOC105132099 [Populus euphratica]	.	.	.	.	.	.	.	.	.	.	.	.	.	.	.	.	.	.	.
f3p60_922_30880	-0.206916	0.231557	down	no	-0.438429	0.0197974	down	no	-0.0325623	0.847499	down	no	0.207735	0.245864	up	no	1.02694	7.0324e-10	up	yes	Gene.15176::PuPacbio_f3p60_922_transcript30880_g2::g.15176::m.15176	106-597[+]	gi|566152693|ref|XM_006369805.1|	1515	E:0	Populus trichocarpa AWPM-19-like membrane family protein (POPTR_0001s34320g) mRNA, complete cds	gi|743923474|ref|XP_011005830.1|	255	E:3e-82	PREDICTED: uncharacterized protein LOC105111993 [Populus euphratica]	.	.	.	.	.	.	.	.	PF05512.10	AWPM-19	AWPM-19-like family	.	.	.	ExpAA=88.36^PredHel=4^Topology=i12-34o64-86i99-121o136-158i	.	.	.	.
f3p60_853_31778	-1.4451	3.56557e-15	down	yes	-0.0866155	0.581797	down	no	-0.0111253	0.937855	down	no	0.146544	0.397333	up	no	-0.368721	0.0270635	down	no	Gene.15533::PuPacbio_f3p60_853_transcript31778_g3::g.15533::m.15533	3-674[+]	gi|114158734|gb|AC182662.2|	1393	E:0	Populus trichocarpa clone Pop1-15O24, complete sequence	gi|566214672|ref|XP_006371999.1|	378	E:1e-129	hypothetical protein POPTR_0018s07110g [Populus trichocarpa]	.	.	.	.	.	.	.	.	.	.	.	.	.	.	ExpAA=88.44^PredHel=4^Topology=i21-43o58-80i87-109o129-151i	.	.	.	.
f3p60_829_32205	1.00302	3.86732e-06	up	yes	0.975052	4.37995e-06	up	no	0.320182	0.158709	up	no	0.118598	0.6276	up	no	0.343254	0.190325	up	no	Gene.15701::PuPacbio_f3p60_829_transcript32205_g4::g.15701::m.15701	125-688[+]	gi|566199118|ref|XM_002319543.2|	1382	E:0	Populus trichocarpa hypothetical protein (POPTR_0013s03030g) mRNA, complete cds	gi|224125410|ref|XP_002319579.1|	386	E:1e-133	hypothetical protein POPTR_0013s03030g [Populus trichocarpa]	.	.	.	.	.	.	.	.	PF00861.21	Ribosomal_L18p	Ribosomal L18 of archaea, bacteria, mitoch. and chloroplast	.	.	.	.	.	GO:0006412|translation	GO:0003735|structural constituent of ribosome	GO:0005622|intracellular;GO:0005840|ribosome
f3p60_826_32148	2.06832	1.40446e-09	up	yes	1.69624	2.82883e-06	up	yes	0.655833	0.0788465	up	no	0.695695	0.0384847	up	no	0.468275	0.159323	up	no	Gene.15687::PuPacbio_f3p60_826_transcript32148_g2::g.15687::m.15687	2-325[+]	gi|566196709|ref|XM_002317663.2|	536	E:4e-149	Populus trichocarpa hypothetical protein (POPTR_0012s04100g) mRNA, partial cds	gi|566196710|ref|XP_002317699.2|	185	E:2e-55	hypothetical protein POPTR_0012s04100g, partial [Populus trichocarpa]	.	.	.	.	.	.	.	.	.	.	.	.	.	.	.	.	.	.	.
f3p60_773_32869	-1.01236	4.83566e-26	down	yes	0.796555	5.31688e-28	up	no	-0.365665	0.000430361	down	no	-0.436857	NA	down	no	-1.31388	2.15505e-36	down	yes	.	.	gi|157410312|gb|AC210551.1|	1221	E:0	Populus trichocarpa clone POP049-I23, complete sequence	gi|566211988|ref|XP_006373027.1|	53.9	E:1e-06	hypothetical protein POPTR_0017s07340g, partial [Populus trichocarpa]	.	.	.	.	.	.	.	.	.	.	.	.	.	.	.	.	.	.	.
f3p60_753_33115	1.22198	1.50949e-37	up	yes	0.893854	1.14757e-22	up	no	0.400568	0.000368941	up	no	0.367681	0.00221463	up	no	-0.190488	0.0946959	down	no	.	.	gi|566184600|ref|XM_002311693.2|	1308	E:0	Populus trichocarpa hypothetical protein (POPTR_0008s17950g) mRNA, complete cds	gi|566189435|ref|XP_002314553.2|	205	E:3e-63	hypothetical protein POPTR_0010s06550g [Populus trichocarpa]	.	.	.	.	.	.	.	.	.	.	.	.	.	.	.	.	.	.	.
f3p60_751_33145	-0.681654	1.78654e-07	down	no	1.17555	5.05106e-36	up	yes	-0.229962	0.083015	down	no	-0.279373	NA	down	no	-0.781647	9.17767e-10	down	no	.	.	gi|566179399|ref|XM_002309835.2|	1181	E:0	Populus trichocarpa hypothetical protein (POPTR_0007s03400g) mRNA, complete cds	.	.	.	.	.	.	.	.	.	.	.	.	.	.	.	.	.	.	.	.	.	.	.
f3p60_727_13652	1.46638	4.76449e-08	up	yes	2.25286	2.14762e-25	up	yes	1.91529	1.2646e-14	up	yes	1.76526	2.20317e-11	up	yes	0.898198	0.000167215	up	no	.	.	gi|566190524|ref|XM_002315874.2|	228	E:3e-56	Populus trichocarpa hypothetical protein (POPTR_0010s12840g) mRNA, complete cds	gi|566190525|ref|XP_002315910.2|	59.7	E:3e-09	hypothetical protein POPTR_0010s12840g [Populus trichocarpa]	.	.	.	.	.	.	.	.	.	.	.	.	.	.	.	.	.	.	.
f3p60_703_33759	-0.981822	7.19665e-22	down	no	0.735601	3.97446e-23	up	no	-0.21217	0.0263603	down	no	-0.39771	NA	down	no	-1.091	9.18471e-20	down	yes	.	.	gi|566211999|ref|XM_002323699.2|	1120	E:0	Populus trichocarpa hypothetical protein (POPTR_0017s07400g) mRNA, complete cds	gi|566211988|ref|XP_006373027.1|	54.7	E:4e-07	hypothetical protein POPTR_0017s07340g, partial [Populus trichocarpa]	.	.	.	.	.	.	.	.	.	.	.	.	.	.	.	.	.	.	.
f3p60_703_14006	2.28991	3.32014e-38	up	yes	1.59451	1.57406e-18	up	yes	1.07287	6.51275e-08	up	yes	1.59009	1.10805e-18	up	yes	0.67697	0.00100275	up	no	Gene.7230::PuPacbio_f3p60_703_transcript14006_g1::g.7230::m.7230	96-557[+]	gi|743941579|ref|XM_011016980.1|	809	E:0	PREDICTED: Populus euphratica uncharacterized LOC105118921 (LOC105118921), mRNA	gi|743941580|ref|XP_011015282.1|	297	E:8e-100	PREDICTED: uncharacterized protein LOC105118921 [Populus euphratica]	.	.	.	.	.	.	.	.	.	.	.	.	.	.	ExpAA=18.98^PredHel=1^Topology=i117-139o	.	.	.	.
f3p60_672_34129	-0.856046	9.4392e-20	down	no	-0.390217	8.63499e-07	down	no	-1.26858	5.46171e-40	down	yes	-2.56374	2.36734e-92	down	yes	-2.04488	6.02168e-71	down	yes	.	.	gi|566179568|ref|XM_006380322.1|	538	E:1e-149	Populus trichocarpa hypothetical protein (POPTR_0007s04390g) mRNA, complete cds	gi|566179569|ref|XP_006380384.1|	92.8	E:3e-21	hypothetical protein POPTR_0007s04390g [Populus trichocarpa]	.	.	.	.	.	.	.	.	.	.	.	.	.	.	.	.	.	.	.
f3p60_618_34976	-0.897922	1.3777e-10	down	no	-1.31017	1.13351e-21	down	yes	-0.148291	0.269523	down	no	-0.177637	0.287885	down	no	0.0483301	0.749965	up	no	Gene.16469::PuPacbio_f3p60_618_transcript34976_g3::g.16469::m.16469	16-321[+]	gi|158420593|gb|AC212928.1|	802	E:0	Populus trichocarpa clone POP043-P14, complete sequence	.	.	.	.	.	.	.	.	.	.	.	.	.	.	.	.	.	.	.	.	.	.	.
f3p60_556_15220	-0.604273	0.0187619	down	no	-0.923445	0.000375099	down	no	-1.20324	2.43029e-06	down	yes	-0.983167	5.96198e-05	down	no	-1.13871	4.707e-06	down	yes	.	.	gi|566148510|ref|XM_002299360.2|	918	E:0	Populus trichocarpa hypothetical protein (POPTR_0001s12030g) mRNA, complete cds	gi|566148511|ref|XP_002299396.2|	154	E:1e-44	hypothetical protein POPTR_0001s12030g [Populus trichocarpa]	.	.	.	.	.	.	.	.	.	.	.	.	.	.	.	.	.	.	.
f3p60_535_15637	0.233251	0.231653	up	no	-0.309767	0.117035	down	no	-1.23499	2.39952e-08	down	yes	-0.590046	0.013846	down	no	-1.00311	6.0485e-06	down	yes	.	.	gi|743842947|ref|XM_011028531.1|	774	E:0	PREDICTED: Populus euphratica uncharacterized LOC105127292 (LOC105127292), mRNA	gi|743842948|ref|XP_011026833.1|	108	E:2e-27	PREDICTED: uncharacterized protein LOC105127292 [Populus euphratica]	.	.	.	.	.	.	.	.	.	.	.	.	.	.	.	.	.	.	.
f3p60_520_15770	1.3646	1.05687e-29	up	yes	1.60521	1.1666e-44	up	yes	1.16868	7.85924e-20	up	yes	0.302449	0.216271	up	no	-0.328308	0.0465957	down	no	.	.	gi|109134366|gb|AC184062.2|	414	E:1e-112	Populus trichocarpa clone Pop1-107J2, complete sequence	gi|566146954|ref|XP_006368478.1|	41.6	E:8e-07	hypothetical protein POPTR_0001s03225g [Populus trichocarpa]	.	.	.	.	.	.	.	.	.	.	.	.	.	.	.	.	.	.	.
f3p60_519_15633	1.27822	6.96829e-07	up	yes	1.27077	1.80827e-07	up	yes	1.34029	6.11234e-09	up	yes	-0.34693	0.212611	down	no	-0.699473	0.0165293	down	no	.	.	gi|224108276|ref|XM_002314749.1|	411	E:2e-111	Populus trichocarpa hypothetical protein (POPTR_0010s11750g) mRNA, complete cds	gi|224108277|ref|XP_002314785.1|	157	E:4e-47	hypothetical protein POPTR_0010s11750g [Populus trichocarpa]	.	.	.	.	.	.	.	.	.	.	.	.	.	.	.	.	.	.	.
f3p60_516_36358	-1.44355	3.3881e-18	down	yes	-1.03386	4.28283e-14	down	yes	-1.20019	2.4627e-14	down	yes	-0.0956363	0.586443	down	no	-0.460281	0.0250568	down	no	.	.	gi|743872650|ref|XR_843569.1|	750	E:0	PREDICTED: Populus euphratica uncharacterized LOC105132403 (LOC105132403), ncRNA	gi|566184943|ref|XP_006380025.1|	97.4	E:1e-23	hypothetical protein POPTR_0008s19810g [Populus trichocarpa]	.	.	.	.	.	.	.	.	.	.	.	.	.	.	.	.	.	.	.
f3p60_513_36335	-0.66247	0.160923	down	no	1.62974	3.23948e-07	up	yes	0.305917	0.381354	up	no	0.246667	0.441214	up	no	0.651213	0.0317336	up	no	.	.	gi|566170456|ref|XM_002306367.2|	780	E:0	Populus trichocarpa hypothetical protein (POPTR_0005s09890g) mRNA, complete cds	.	.	.	.	.	.	.	.	.	.	.	.	.	.	.	.	.	.	.	.	.	.	.
f3p60_511_15706	-0.628153	0.00104244	down	no	-0.910409	1.00165e-07	down	no	-1.12362	1.2355e-08	down	yes	-0.433746	0.048604	down	no	-0.89934	5.27809e-07	down	no	.	.	gi|157824249|gb|AC211804.1|	785	E:0	Populus trichocarpa clone POP017-B20, complete sequence	.	.	.	.	.	.	.	.	.	.	.	.	.	.	.	.	.	.	.	.	.	.	.
f3p60_493_36594	2.29602	9.40372e-06	up	yes	0.576565	0.281592	up	no	1.40246	0.000373697	up	yes	-0.00923373	0.962317	down	no	-0.076641	0.698649	down	no	.	.	gi|118485764|gb|EF146676.1|	824	E:0	Populus trichocarpa clone WS01211_M02 unknown mRNA	.	.	.	.	.	.	.	.	.	.	.	.	.	.	.	.	.	.	.	.	.	.	.
f3p60_471_15981	2.05009	4.11887e-09	up	yes	3.24059	7.01571e-31	up	yes	2.77069	8.39827e-25	up	yes	1.27641	8.12586e-05	up	yes	0.535384	0.0914179	up	no	.	.	gi|566189928|ref|XM_002314632.2|	695	E:0	Populus trichocarpa hypothetical protein (POPTR_0010s09290g) mRNA, complete cds	gi|224107959|ref|XP_002314668.1|	84.3	E:6e-19	hypothetical protein POPTR_0010s09290g [Populus trichocarpa]	.	.	.	.	.	.	.	.	.	.	.	.	.	.	.	.	.	.	.
f3p60_453_16162	0.596936	0.16795	up	no	1.9806	0.000223055	up	yes	0.458409	0.0946628	up	no	0.0597146	0.525983	up	no	0.209024	0.211073	up	no	.	.	gi|566213527|ref|XM_002324777.2|	527	E:1e-146	Populus trichocarpa hypothetical protein (POPTR_0018s00700g) mRNA, complete cds	gi|224143001|ref|XP_002324813.1|	101	E:1e-24	hypothetical protein POPTR_0018s00700g [Populus trichocarpa]	.	.	.	.	.	.	.	.	.	.	.	.	.	.	.	.	.	.	.
f3p60_399_16493	2.01363	4.38051e-13	up	yes	1.908	1.2518e-13	up	yes	1.10318	0.000125104	up	yes	0.424502	0.154757	up	no	-0.483372	0.117618	down	no	.	.	gi|566151350|ref|XM_002299919.2|	551	E:7e-154	Populus trichocarpa hypothetical protein (POPTR_0001s27750g) mRNA, complete cds	.	.	.	.	.	.	.	.	.	.	.	.	.	.	.	.	.	.	.	.	.	.	.
f3p60_3851_573	-1.21426	1.57265e-82	down	yes	-0.691795	1.76702e-24	down	no	-0.626101	0.00296289	down	no	-1.24332	5.18785e-21	down	yes	-1.27158	9.20592e-28	down	yes	Gene.596::PuPacbio_f3p60_3851_transcript573_g1::g.596::m.596	117-3257[+]	gi|743899006|ref|XM_011044489.1|	1687	E:0	PREDICTED: Populus euphratica extensin-2-like (LOC105138427), mRNA	gi|743899007|ref|XP_011042791.1|	241	E:5e-64	PREDICTED: extensin-2-like [Populus euphratica]	.	.	.	.	EXTN3_ARATH	53.1	E:1e-05	RecName: Full=Extensin-3 {ECO:0000303|PubMed:11475326};^Eukaryota; Viridiplantae; Streptophyta; Embryophyta; Tracheophyta; Spermatophyta; Magnoliophyta; eudicotyledons; Gunneridae; Pentapetalae; rosids; malvids; Brassicales; Brassicaceae; Camelineae; Arabidopsis	PF01190.16	Pollen_Ole_e_I	Pollen proteins Ole e I like	ENOG41104BK	Extensin-like region	.	.	.	GO:0009664|plant-type cell wall organizationGO:0009664|plant-type cell wall organization	GO:0005199|structural constituent of cell wallGO:0005199|structural constituent of cell wall	GO:0005576|extracellular region;GO:0009530|primary cell wall
f3p60_1465_25475	1.11008	1.35939e-08	up	yes	1.18571	1.478e-10	up	yes	0.860351	1.20813e-05	up	no	0.768343	1.68391e-05	up	no	0.412428	0.0278913	up	no	Gene.12808::PuPacbio_f3p60_1465_transcript25475_g7::g.12808::m.12808	124-1143[+]	gi|743924345|ref|XM_011007994.1|	1685	E:0	PREDICTED: Populus euphratica uncharacterized LOC105112322 (LOC105112322), mRNA	gi|743924346|ref|XP_011006296.1|	481	E:2e-165	PREDICTED: uncharacterized protein LOC105112322 [Populus euphratica]	.	.	.	.	.	.	.	.	.	.	.	.	.	.	ExpAA=144.37^PredHel=6^Topology=i36-58o100-122i135-157o177-199i237-259o279-301i	.	.	.	.
f3p60_1402_7782	1.14512	1.29465e-06	up	yes	0.977825	4.36675e-05	up	no	1.61772	2.1643e-16	up	yes	0.743321	0.0100746	up	no	0.10847	0.663883	up	no	.	.	gi|118482568|gb|EF145007.1|	387	E:8e-104	Populus trichocarpa clone WS0111_I05 unknown mRNA	gi|224057756|ref|XP_002299312.1|	102	E:6e-24	hypothetical protein POPTR_0001s13750g [Populus trichocarpa]	.	.	.	.	.	.	.	.	.	.	.	.	.	.	.	.	.	.	.
f3p60_1170_28184	-0.0617435	0.444648	down	no	-0.257589	0.000904591	down	no	-0.716096	2.37811e-08	down	no	-0.524072	2.24118e-06	down	no	-1.17049	9.78707e-26	down	yes	Gene.14064::PuPacbio_f3p60_1170_transcript28184_g4::g.14064::m.14064	41-853[+]	gi|566259728|ref|XM_006389358.1|	1062	E:0	Populus trichocarpa hypothetical protein (POPTR_0025s00540g) mRNA, complete cds	gi|566259729|ref|XP_006389420.1|	363	E:2e-122	hypothetical protein POPTR_0025s00540g [Populus trichocarpa]	.	.	.	.	.	.	.	.	.	.	.	.	.	.	.	.	.	.	.
f3p60_1133_28560	0.191228	0.00210982	up	no	1.28989	6.95319e-111	up	yes	0.580953	2.33438e-13	up	no	0.263143	0.00173218	up	no	0.0644288	0.389697	up	no	Gene.14218::PuPacbio_f3p60_1133_transcript28560_g2::g.14218::m.14218	1-753[+]	gi|566147396|ref|XM_006368511.1|	1701	E:0	Populus trichocarpa hypothetical protein (POPTR_0001s05720g) mRNA, complete cds	gi|743886935|ref|XP_011037985.1|	164	E:5e-42	PREDICTED: uncharacterized protein LOC105135011 [Populus euphratica]	.	.	.	.	.	.	.	.	.	.	.	.	.	.	.	.	.	.	.
f3p60_1016_29941	2.21215	1.03687e-193	up	yes	0.878373	3.5353e-33	up	no	1.06082	1.60065e-28	up	yes	0.29224	0.120985	up	no	0.268455	NA	up	no	.	.	gi|167963540|gb|AC217572.1|	835	E:0	Populus trichocarpa clone POP094-N05, complete sequence	gi|566220954|ref|XP_002325713.2|	51.6	E:7e-06	hypothetical protein POPTR_0019s00860g [Populus trichocarpa]	.	.	.	.	.	.	.	.	.	.	.	.	.	.	.	.	.	.	.
f3p60_1008_29997	3.81492	9.40357e-18	up	yes	3.6579	NA	up	no	3.10914	NA	up	no	1.82662	4.28363e-08	up	yes	0.902809	0.00655113	up	no	Gene.14811::PuPacbio_f3p60_1008_transcript29997_g4::g.14811::m.14811	1-630[+]	gi|224107866|ref|XM_002314597.1|	1027	E:0	Populus trichocarpa hypothetical protein (POPTR_0010s08290g) mRNA, complete cds	.	.	.	.	.	.	.	.	PRP2_SOYBN	103	E:2e-25	RecName: Full=Repetitive proline-rich cell wall protein 2;^Eukaryota; Viridiplantae; Streptophyta; Embryophyta; Tracheophyta; Spermatophyta; Magnoliophyta; eudicotyledons; Gunneridae; Pentapetalae; rosids; fabids; Fabales; Fabaceae; Papilionoideae; Phaseoleae; Glycine; Soja	.	.	.	.	.	.	ExpAA=20.42^PredHel=1^Topology=i12-31o	.	GO:0007275|multicellular organism development	GO:0005199|structural constituent of cell wall	GO:0005618|cell wall;GO:0005576|extracellular region
f3p52_486_36636	1.77646	7.56741e-10	up	yes	2.08528	5.22109e-15	up	yes	0.642263	0.0321004	up	no	-0.435477	0.174363	down	no	-0.478401	0.149413	down	no	.	.	gi|158420593|gb|AC212928.1|	743	E:0	Populus trichocarpa clone POP043-P14, complete sequence	gi|566258744|ref|XP_006388947.1|	129	E:2e-36	hypothetical protein POPTR_0069s00240g [Populus trichocarpa]	.	.	.	.	.	.	.	.	.	.	.	.	.	.	.	.	.	.	.
f3p52_1948_4531	-1.1796	5.09183e-19	down	yes	-1.07735	6.39005e-18	down	yes	-1.65131	5.5286e-21	down	yes	-0.89106	6.29923e-10	down	no	-0.91123	7.32129e-05	down	no	Gene.3309::PuPacbio_f3p52_1948_transcript4531_g1::g.3309::m.3309	415-1947[+]	gi|743924199|ref|XM_011007916.1|	1336	E:0	PREDICTED: Populus euphratica uncharacterized LOC105112274 (LOC105112274), mRNA	gi|743924200|ref|XP_011006218.1|	119	E:1e-25	PREDICTED: uncharacterized protein LOC105112274 [Populus euphratica]	.	.	.	.	.	.	.	.	.	.	.	.	.	.	ExpAA=35.49^PredHel=1^Topology=o482-501i	.	.	.	.
f3p43_978_11264	1.59403	1.18957e-06	up	yes	0.530971	0.156423	up	no	0.444484	0.180632	up	no	-0.0357539	0.911448	down	no	-0.171416	0.595794	down	no	.	.	gi|164498897|gb|AC216408.1|	255	E:2e-64	Populus trichocarpa clone POP002-L05, complete sequence	.	.	.	.	.	.	.	.	.	.	.	.	.	.	.	.	.	.	.	.	.	.	.
f3p22_951_11713	1.38482	4.23907e-25	up	yes	0.455087	0.00213106	up	no	0.263223	0.0981359	up	no	-0.131932	0.416513	down	no	0.107275	0.521851	up	no	Gene.6513::PuPacbio_f3p22_951_transcript11713_g1::g.6513::m.6513	72-626[+]	gi|743838249|ref|XM_011027363.1|	1339	E:0	PREDICTED: Populus euphratica uncharacterized LOC105126492 (LOC105126492), mRNA	gi|566180874|ref|XP_002310770.2|	266	E:6e-86	hypothetical protein POPTR_0007s11980g [Populus trichocarpa]	.	.	.	.	.	.	.	.	.	.	.	.	.	.	.	.	.	.	.
f2p60_998_30070	0.592017	0.167075	up	no	1.07193	0.00595264	up	yes	0.810328	0.0170703	up	no	0.307651	0.343584	up	no	0.438256	0.168374	up	no	Gene.14844::PuPacbio_f2p60_998_transcript30070_g4::g.14844::m.14844	161-763[+]	gi|566157019|ref|XM_002302227.2|	1725	E:0	Populus trichocarpa hypothetical protein (POPTR_0002s09020g) mRNA, complete cds	gi|566157020|ref|XP_002302263.2|	364	E:5e-124	hypothetical protein POPTR_0002s09020g [Populus trichocarpa]	.	.	.	.	.	.	.	.	.	.	.	.	.	.	.	.	.	.	.
f2p60_983_30209	4.57823	0	up	yes	3.0897	4.61792e-137	up	yes	2.97069	2.08633e-92	up	yes	1.71472	NA	up	no	2.75148	3.95145e-87	up	yes	Gene.14898::PuPacbio_f2p60_983_transcript30209_g5::g.14898::m.14898	1-753[+]	gi|566164920|ref|XM_002305749.2|	1591	E:0	Populus trichocarpa maturation protein pPM32 (POPTR_0004s04580g) mRNA, complete cds	gi|224079183|ref|XP_002305785.1|	220	E:3e-67	maturation protein pPM32 [Populus trichocarpa]	.	.	.	.	DRPF_CRAPL	50.1	E:4e-06	RecName: Full=Desiccation-related protein PCC3-06;^Eukaryota; Viridiplantae; Streptophyta; Embryophyta; Tracheophyta; Spermatophyta; Magnoliophyta; eudicotyledons; Gunneridae; Pentapetalae; asterids; lamiids; Lamiales; Linderniaceae; Craterostigma	PF01442.17	Apolipoprotein	Apolipoprotein A1/A4/E domain	.	.	.	.	.	GO:0071465|cellular response to desiccation;GO:1902075|cellular response to salt;GO:0009611|response to woundingGO:0006869|lipid transport;GO:0042157|lipoprotein metabolic process	GO:0008289|lipid binding	GO:0005576|extracellular region
f2p60_972_30334	-1.57849	5.03352e-19	down	yes	-1.10162	2.54663e-12	down	yes	-0.635345	1.54415e-05	down	no	-0.716046	0.000199648	down	no	-0.549806	0.000120115	down	no	Gene.14946::PuPacbio_f2p60_972_transcript30334_g8::g.14946::m.14946	136-678[+]	gi|743785621|ref|XM_011027321.1|	1491	E:0	PREDICTED: Populus euphratica uncharacterized LOC105126446 (LOC105126446), transcript variant X1, mRNA	gi|566183991|ref|XP_002311585.2|	431	E:8e-150	hypothetical protein POPTR_0008s14590g [Populus trichocarpa]	.	.	.	.	.	.	.	.	PF14009.5	DUF4228	Domain of unknown function (DUF4228)	.	.	.	.	.	.	.	.
f2p60_963_305430	1.19604	2.86827e-08	up	yes	0.630496	0.00512153	up	no	0.817412	0.000184229	up	no	0.760439	0.000264283	up	no	0.407788	0.0608139	up	no	Gene.15033::PuPacbio_f2p60_963_transcript30543_g10::g.15033::m.15033	1-423[+]	gi|743804328|ref|XM_011019015.1|	1559	E:0	PREDICTED: Populus euphratica uncharacterized LOC105120708 (LOC105120708), mRNA	gi|743804329|ref|XP_011017317.1|	255	E:2e-120	PREDICTED: uncharacterized protein LOC105120708 [Populus euphratica]	.	.	.	.	.	.	.	.	.	.	.	.	.	.	.	.	.	.	.
f2p60_962_30436	0.425072	0.00481333	up	no	-1.01496	0.00468969	down	yes	0.0539863	0.768834	up	no	0.150012	0.406421	up	no	-0.0505578	0.814395	down	no	Gene.14989::PuPacbio_f2p60_962_transcript30436_g6::g.14989::m.14989	96-647[+]	gi|566154087|ref|XM_006370237.1|	1670	E:0	Populus trichocarpa hypothetical protein (POPTR_0001s41410g) mRNA, complete cds	gi|566154088|ref|XP_006370299.1|	343	E:5e-116	hypothetical protein POPTR_0001s41410g [Populus trichocarpa]	.	.	.	.	.	.	.	.	PF06749.11	DUF1218	Protein of unknown function (DUF1218)	.	.	.	ExpAA=87.27^PredHel=4^Topology=o5-24i50-72o92-114i139-161o	.	.	.	.
f2p60_937_30756	1.32919	9.0004e-43	up	yes	0.644871	2.26412e-10	up	no	0.454048	3.75283e-05	up	no	0.0692515	0.55614	up	no	-0.26812	0.0278726	down	no	Gene.15119::PuPacbio_f2p60_937_transcript30756_g8::g.15119::m.15119	115-648[+]	gi|743793867|ref|XM_011049989.1|	1280	E:0	PREDICTED: Populus euphratica uncharacterized LOC105142384 (LOC105142384), mRNA	gi|224103403|ref|XP_002313042.1|	316	E:1e-105	universal stress family protein [Populus trichocarpa]	.	.	.	.	.	.	.	.	PF00582.25	Usp	Universal stress protein family	.	.	.	.	.	GO:0006950|response to stress	.	.
f2p60_911_31040	-0.629013	0.154757	down	no	0.36297	0.332994	up	no	0.807514	0.0118698	up	no	0.876245	0.00553818	up	no	1.2354	1.65705e-05	up	yes	Gene.15248::PuPacbio_f2p60_911_transcript31040_g6::g.15248::m.15248	120-656[+]	gi|743862016|ref|XM_011032973.1|	1456	E:0	PREDICTED: Populus euphratica uncharacterized LOC105130451 (LOC105130451), mRNA	gi|566181421|ref|XP_006380835.1|	276	E:3e-90	hypothetical protein POPTR_0007s15070g [Populus trichocarpa]	.	.	.	.	.	.	.	.	.	.	.	.	.	.	.	.	.	.	.
f2p60_909_311001	-0.569689	4.10674e-13	down	no	0.351298	3.46525e-07	up	no	-1.07304	9.65034e-29	down	yes	-1.32204	8.23037e-06	down	yes	-2.21541	1.36795e-81	down	yes	Gene.15273::PuPacbio_f2p60_909_transcript31100_g11::g.15273::m.15273	268-606[-]	gi|566163719|ref|XM_006385957.1|	383	E:7e-103	Populus trichocarpa hypothetical protein (POPTR_0003s20340g) mRNA, partial cds	.	.	.	.	.	.	.	.	.	.	.	.	.	.	.	.	.	.	.	.	.	.	.
f2p60_902_11927	-1.8242	7.75176e-09	down	yes	-0.761982	0.13899	down	no	-0.98652	0.0120115	down	no	-0.666361	0.00383355	down	no	-0.443694	0.162892	down	no	Gene.6605::PuPacbio_f2p60_902_transcript11927_g2::g.6605::m.6605	78-584[+]	gi|743939084|ref|XM_011015689.1|	1314	E:0	PREDICTED: Populus euphratica uncharacterized LOC105117888 (LOC105117888), mRNA	gi|224106331|ref|XP_002314132.1|	325	E:9e-110	hypothetical protein POPTR_0009s04580g [Populus trichocarpa]	.	.	.	.	.	.	.	.	.	.	.	.	.	.	.	.	.	.	.
f2p60_897_313650	-1.41056	7.73667e-25	down	yes	-0.337027	0.00255418	down	no	-0.102138	0.40978	down	no	0.160724	0.16198	up	no	0.641213	3.38155e-07	up	no	Gene.15365::PuPacbio_f2p60_897_transcript31365_g10::g.15365::m.15365	76-684[+]	gi|566156427|ref|XM_002300826.2|	1482	E:0	Populus trichocarpa hypothetical protein (POPTR_0002s05730g) mRNA, complete cds	gi|566156428|ref|XP_002300862.2|	370	E:5e-127	hypothetical protein POPTR_0002s05730g [Populus trichocarpa]	.	.	.	.	.	.	.	.	PF06414.11	Zeta_toxin	Zeta toxin	.	.	.	.	.	.	GO:0005524|ATP binding;GO:0016301|kinase activity	.
f2p60_886_31378	0.0993415	0.544099	up	no	0.452292	0.00185077	up	no	1.4891	2.16233e-26	up	yes	0.201832	0.413642	up	no	-0.12981	0.432897	down	no	Gene.15371::PuPacbio_f2p60_886_transcript31378_g8::g.15371::m.15371	92-610[+]	gi|566210141|ref|XM_006373972.1|	1411	E:0	Populus trichocarpa hypothetical protein (POPTR_0016s13650g) mRNA, complete cds	gi|566210142|ref|XP_006374034.1|	344	E:6e-117	hypothetical protein POPTR_0016s13650g [Populus trichocarpa]	.	.	.	.	.	.	.	.	PF14009.5	DUF4228	Domain of unknown function (DUF4228)	.	.	.	.	.	.	.	.
f2p60_873_12317	1.33207	8.10094e-09	up	yes	1.73095	8.183e-19	up	yes	1.53555	1.43869e-14	up	yes	1.63696	1.72473e-16	up	yes	1.81382	7.76442e-22	up	yes	Gene.6736::PuPacbio_f2p60_873_transcript12317_g3::g.6736::m.6736	75-788[+]	gi|566198378|ref|XM_002318213.2|	1445	E:0	Populus trichocarpa hypothetical protein (POPTR_0012s13830g) mRNA, complete cds	gi|224120126|ref|XP_002318249.1|	395	E:3e-136	hypothetical protein POPTR_0012s13830g [Populus trichocarpa]	.	.	.	.	.	.	.	.	.	.	.	.	.	.	.	.	.	.	.
f2p60_864_31649	-1.68413	3.15075e-34	down	yes	-0.394891	0.000143963	down	no	-0.140891	0.217401	down	no	-0.658408	1.11772e-05	down	no	-0.294277	0.112643	down	no	Gene.15470::PuPacbio_f2p60_864_transcript31649_g8::g.15470::m.15470	84-521[+]	gi|566173114|ref|XM_002306840.2|	959	E:0	Populus trichocarpa hypothetical protein (POPTR_0005s25020g) mRNA, complete cds	gi|224082880|ref|XP_002306876.1|	294	E:8e-98	hypothetical protein POPTR_0005s25020g [Populus trichocarpa]	.	.	.	.	.	.	.	.	.	.	.	.	.	.	.	.	.	.	.
f2p60_857_12581	-1.27276	4.31191e-06	down	yes	-0.172494	0.423705	down	no	0.675037	0.000477455	up	no	0.445041	0.091275	up	no	0.661535	0.000313149	up	no	.	.	gi|118489588|gb|EF148634.1|	704	E:0	Populus trichocarpa x Populus deltoides clone WS0135_G16 unknown mRNA	gi|118489589|gb|ABK96596.1|	81.3	E:1e-20	unknown [Populus trichocarpa x Populus deltoides]	.	.	.	.	.	.	.	.	.	.	.	.	.	.	.	.	.	.	.
f2p60_844_320467	-1.42167	2.31276e-37	down	yes	-0.716801	4.25245e-13	down	no	-0.817064	2.60173e-15	down	no	-0.492652	1.33256e-06	down	no	-0.533045	8.49679e-06	down	no	Gene.15634::PuPacbio_f2p60_844_transcript32046_g17::g.15634::m.15634	2-616[+]	gi|566187805|ref|XM_002313690.2|	1284	E:0	Populus trichocarpa 1-phosphatidylinositol phosphodiesterase-related family protein (POPTR_0009s13420g) mRNA, complete cds	gi|224105205|ref|XP_002313726.1|	411	E:2e-141	1-phosphatidylinositol phosphodiesterase-related family protein [Populus trichocarpa]	.	.	.	.	.	.	.	.	.	.	.	.	.	.	.	.	.	.	.
f2p60_840_323166	-1.1738	3.14488e-07	down	yes	-1.32975	6.45852e-10	down	yes	-0.555236	0.0129589	down	no	-0.725226	0.000298329	down	no	-0.515769	0.00740363	down	no	Gene.15743::PuPacbio_f2p60_840_transcript32316_g16::g.15743::m.15743	187-516[+]	gi|118487152|gb|EF147391.1|	1284	E:0	Populus trichocarpa clone WS01230_F05 unknown mRNA	gi|118487153|gb|ABK95405.1|	138	E:3e-38	unknown [Populus trichocarpa]	.	.	.	.	.	.	.	.	.	.	.	.	.	.	.	.	.	.	.
f2p60_829_32089	-1.32599	3.65726e-36	down	yes	-0.305993	0.000628475	down	no	-0.229511	0.0301739	down	no	-0.585712	1.28689e-06	down	no	-0.288343	0.121685	down	no	Gene.15659::PuPacbio_f2p60_829_transcript32089_g6::g.15659::m.15659	81-518[+]	gi|566173114|ref|XM_002306840.2|	1262	E:0	Populus trichocarpa hypothetical protein (POPTR_0005s25020g) mRNA, complete cds	gi|224082880|ref|XP_002306876.1|	292	E:2e-97	hypothetical protein POPTR_0005s25020g [Populus trichocarpa]	.	.	.	.	.	.	.	.	.	.	.	.	.	.	.	.	.	.	.
f2p60_827_321271	1.02054	0.0710967	up	no	2.0865	4.80049e-05	up	yes	3.33276	1.41904e-20	up	yes	0.97074	0.00175895	up	no	0.0842624	0.737748	up	no	Gene.15680::PuPacbio_f2p60_827_transcript32127_g11::g.15680::m.15680	84-590[+]	gi|118487259|gb|EF147445.1|	1267	E:0	Populus trichocarpa clone WS01231_C02 unknown mRNA	gi|224087825|ref|XP_002308239.1|	294	E:7e-98	hypothetical protein POPTR_0006s10630g [Populus trichocarpa]	.	.	.	.	.	.	.	.	PF14009.5	DUF4228	Domain of unknown function (DUF4228)	.	.	.	.	.	.	.	.
f2p60_825_12592	-1.18854	0.0157584	down	yes	-0.172002	0.680171	down	no	-0.173343	0.632988	down	no	-0.503383	0.131638	down	no	-0.368762	0.261175	down	no	Gene.6817::PuPacbio_f2p60_825_transcript12592_g1::g.6817::m.6817	2-505[+]	gi|566211030|ref|XM_006372527.1|	795	E:0	Populus trichocarpa hypothetical protein (POPTR_0017s03010g) mRNA, complete cds	gi|743927874|ref|XP_011008124.1|	271	E:2e-89	PREDICTED: uncharacterized protein LOC105113593 [Populus euphratica]	.	.	.	.	.	.	.	.	.	.	.	.	.	.	ExpAA=43.17^PredHel=2^Topology=i11-33o48-67i	.	.	.	.
f2p60_823_32158	0.964959	0.0266835	up	no	2.28468	9.09112e-12	up	yes	-0.102063	0.791587	down	no	0.121835	0.712594	up	no	-0.358267	0.278348	down	no	.	.	gi|164663926|gb|AC216602.1|	1249	E:0	Populus trichocarpa clone POP093-D16, complete sequence	gi|224055649|ref|XP_002298584.1|	189	E:4e-57	hypothetical protein POPTR_0001s36080g [Populus trichocarpa]	.	.	.	.	.	.	.	.	.	.	.	.	.	.	.	.	.	.	.
f2p60_808_324371	0.278031	0.330889	up	no	1.19927	1.12306e-07	up	yes	0.264023	0.292223	up	no	0.450465	0.0538958	up	no	-0.73081	0.00686163	down	no	Gene.15785::PuPacbio_f2p60_808_transcript32437_g11::g.15785::m.15785	1-681[+]	gi|743802321|ref|XM_011018572.1|	1295	E:0	PREDICTED: Populus euphratica uncharacterized LOC105120399 (LOC105120399), transcript variant X2, mRNA	gi|743802308|ref|XP_011016870.1|	298	E:9e-99	PREDICTED: uncharacterized protein LOC105120398 isoform X2 [Populus euphratica]	.	.	.	.	.	.	.	.	PF01442.17	Apolipoprotein	Apolipoprotein A1/A4/E domain	.	.	.	.	.	GO:0006869|lipid transport;GO:0042157|lipoprotein metabolic process	GO:0008289|lipid binding	GO:0005576|extracellular region
f2p60_783_32726	0.21013	0.209234	up	no	1.48967	9.51468e-32	up	yes	0.936519	1.81037e-06	up	no	0.651665	0.000466103	up	no	0.644994	1.99532e-05	up	no	.	.	gi|566159155|ref|XM_006386684.1|	1262	E:0	Populus trichocarpa hypothetical protein (POPTR_0002s20810g) mRNA, complete cds	gi|566159156|ref|XP_006386746.1|	164	E:4e-48	hypothetical protein POPTR_0002s20810g [Populus trichocarpa]	.	.	.	.	.	.	.	.	.	.	.	.	.	.	.	.	.	.	.
f2p60_777_32897	-0.60843	0.00905737	down	no	1.11935	3.17876e-21	up	yes	0.226465	0.262476	up	no	-0.187318	0.466331	down	no	-0.485087	0.144593	down	no	Gene.15940::PuPacbio_f2p60_777_transcript32897_g8::g.15940::m.15940	3-347[+]	gi|566213081|ref|XM_006373307.1|	1194	E:0	Populus trichocarpa hypothetical protein (POPTR_0017s13140g) mRNA, complete cds	gi|566213080|ref|XP_006373368.1|	199	E:2e-61	hypothetical protein POPTR_0017s13140g [Populus trichocarpa]	.	.	.	.	RLF27_ARATH	47.8	E:6e-07	RecName: Full=Protein RALF-like 27;^Eukaryota; Viridiplantae; Streptophyta; Embryophyta; Tracheophyta; Spermatophyta; Magnoliophyta; eudicotyledons; Gunneridae; Pentapetalae; rosids; malvids; Brassicales; Brassicaceae; Camelineae; Arabidopsis	PF05498.10	RALF	Rapid ALkalinization Factor (RALF)	.	.	.	ExpAA=22.81^PredHel=1^Topology=i13-35o	.	GO:0019722|calcium-mediated signaling;GO:0007267|cell-cell signaling	GO:0005179|hormone activity;GO:0004871|signal transducer activity	GO:0048046|apoplast;GO:0005622|intracellular
f2p60_773_32695	2.12994	1.14836e-08	up	yes	1.36503	0.000585909	up	yes	0.960279	0.00739326	up	no	0.435871	0.193637	up	no	0.0780562	0.813744	up	no	Gene.15877::PuPacbio_f2p60_773_transcript32695_g9::g.15877::m.15877	1-564[+]	gi|566254299|ref|XM_006387386.1|	1085	E:0	Populus trichocarpa hypothetical protein (POPTR_1031s00220g) mRNA, complete cds	gi|224084076|ref|XP_002307208.1|	248	E:1e-85	hypothetical protein POPTR_0005s10370g [Populus trichocarpa]	.	.	.	.	DIR5_ARATH	50.4	E:7e-07	RecName: Full=Dirigent protein 5;^Eukaryota; Viridiplantae; Streptophyta; Embryophyta; Tracheophyta; Spermatophyta; Magnoliophyta; eudicotyledons; Gunneridae; Pentapetalae; rosids; malvids; Brassicales; Brassicaceae; Camelineae; Arabidopsis	PF03018.13	Dirigent	Dirigent-like protein	ENOG410YHQS	disease resistance response protein 206-like	.	.	.	GO:1901599|(-)-pinoresinol biosynthetic process	GO:0042349|guiding stereospecific synthesis activity;GO:0016853|isomerase activity	GO:0048046|apoplast
f2p60_769_32887	-1.28954	5.44428e-28	down	yes	0.518447	9.74759e-10	up	no	-0.540656	5.58259e-07	down	no	-0.63188	NA	down	no	-1.35792	5.17623e-29	down	yes	.	.	gi|566212006|ref|XM_002323700.2|	1151	E:0	Populus trichocarpa hydroxyproline-rich glycoprotein (POPTR_0017s07440g) mRNA, complete cds	.	.	.	.	.	.	.	.	.	.	.	.	.	.	.	.	.	.	.	.	.	.	.
f2p60_768_32930	-1.4188	2.30789e-25	down	yes	-1.3862	7.12127e-27	down	yes	-0.622384	5.04201e-07	down	no	-0.597291	5.47396e-07	down	no	-0.792372	1.56893e-09	down	no	.	.	gi|118484957|gb|EF146257.1|	1083	E:0	Populus trichocarpa clone WS0116_J15 unknown mRNA	gi|566188653|ref|XP_002314381.2|	92.4	E:2e-20	hypothetical protein POPTR_0010s01670g [Populus trichocarpa]	.	.	.	.	.	.	.	.	.	.	.	.	.	.	.	.	.	.	.
f2p60_768_13289	-0.18251	0.113651	down	no	-0.931377	5.92078e-17	down	no	-0.490904	3.59869e-05	down	no	-1.30028	5.5696e-18	down	yes	-0.843513	3.4019e-11	down	no	Gene.7029::PuPacbio_f2p60_768_transcript13289_g4::g.7029::m.7029	1-420[+]	gi|743809612|ref|XM_011020239.1|	1037	E:0	PREDICTED: Populus euphratica uncharacterized LOC105121554 (LOC105121554), mRNA	gi|566146759|ref|XP_006368384.1|	229	E:6e-71	hypothetical protein POPTR_0001s02290g [Populus trichocarpa]	.	.	.	.	.	.	.	.	PF08238.11	Sel1	Sel1 repeat	.	.	.	.	.	.	.	.
f2p60_753_33095	0.382936	0.0442305	up	no	1.04247	5.33421e-11	up	yes	1.12153	2.77772e-11	up	yes	1.19607	5.42643e-14	up	yes	0.89109	6.85946e-08	up	no	Gene.16010::PuPacbio_f2p60_753_transcript33095_g6::g.16010::m.16010	113-619[+]	gi|566179288|ref|XM_006380260.1|	1219	E:0	Populus trichocarpa hypothetical protein (POPTR_0007s02820g) mRNA, complete cds	gi|566179289|ref|XP_006380322.1|	306	E:5e-103	hypothetical protein POPTR_0007s02820g [Populus trichocarpa]	.	.	.	.	.	.	.	.	PF06749.11	DUF1218	Protein of unknown function (DUF1218)	.	.	.	ExpAA=89.08^PredHel=4^Topology=i5-27o55-74i95-117o132-154i	.	.	.	.
f2p60_751_13683	1.52773	3.28594e-37	up	yes	2.29406	8.03713e-101	up	yes	1.85245	4.82677e-44	up	yes	1.5385	5.41395e-36	up	yes	1.17608	8.46955e-14	up	yes	Gene.7146::PuPacbio_f2p60_751_transcript13683_g5::g.7146::m.7146	3-395[+]	gi|566188692|ref|XM_006378017.1|	1208	E:0	Populus trichocarpa hypothetical protein (POPTR_0010s01900g) mRNA, complete cds	gi|743922015|ref|XP_011005082.1|	227	E:2e-72	PREDICTED: uncharacterized protein LOC105111436 [Populus euphratica]	.	.	.	.	.	.	.	.	.	.	.	.	.	.	.	.	.	.	.
f2p60_744_13544	2.76032	3.93888e-28	up	yes	2.78233	1.44283e-32	up	yes	1.45606	1.18217e-07	up	yes	1.78114	1.2888e-11	up	yes	1.50005	2.72499e-08	up	yes	.	.	gi|123663344|emb|AM458692.1|	106	E:1e-19	Vitis vinifera, whole genome shotgun sequence, contig VV78X217952.5, clone ENTAV 115	.	.	.	.	.	.	.	.	.	.	.	.	.	.	.	.	.	.	.	.	.	.	.
f2p60_737_13585	-1.12503	3.28454e-42	down	yes	0.666451	8.90019e-29	up	no	-0.462185	1.80718e-08	down	no	-0.431946	NA	down	no	-1.239	2.66073e-52	down	yes	.	.	gi|157410312|gb|AC210551.1|	1011	E:0	Populus trichocarpa clone POP049-I23, complete sequence	gi|566211988|ref|XP_006373027.1|	57	E:6e-08	hypothetical protein POPTR_0017s07340g, partial [Populus trichocarpa]	.	.	.	.	.	.	.	.	.	.	.	.	.	.	.	.	.	.	.
f2p60_735_13646	-1.20793	1.17268e-56	down	yes	0.323999	2.91862e-07	up	no	-0.0215279	0.786933	down	no	-0.198264	NA	down	no	-0.859221	2.16511e-23	down	no	.	.	gi|157410312|gb|AC210551.1|	538	E:1e-149	Populus trichocarpa clone POP049-I23, complete sequence	gi|566211988|ref|XP_006373027.1|	57	E:7e-08	hypothetical protein POPTR_0017s07340g, partial [Populus trichocarpa]	.	.	.	.	.	.	.	.	.	.	.	.	.	.	.	.	.	.	.
f2p60_731_334292	-2.26124	4.04104e-33	down	yes	-1.5479	6.4704e-22	down	yes	-1.25634	3.45578e-14	down	yes	-0.788557	2.03856e-06	down	no	-0.580844	0.000510914	down	no	.	.	gi|566176012|ref|XM_006381375.1|	477	E:2e-131	Populus trichocarpa hypothetical protein (POPTR_0006s12830g) mRNA, complete cds	gi|566176013|ref|XP_006381437.1|	197	E:3e-60	hypothetical protein POPTR_0006s12830g [Populus trichocarpa]	.	.	.	.	.	.	.	.	.	.	.	.	.	.	.	.	.	.	.
f2p60_729_33416	2.2031	7.27206e-08	up	yes	1.95761	1.04232e-06	up	yes	1.61134	5.56343e-06	up	yes	0.57252	0.0880014	up	no	-0.252404	0.394875	down	no	Gene.16112::PuPacbio_f2p60_729_transcript33416_g5::g.16112::m.16112	123-473[+]	gi|566199343|ref|XM_002319054.2|	1201	E:0	Populus trichocarpa hypothetical protein (POPTR_0013s04080g) mRNA, complete cds	gi|224123488|ref|XP_002319090.1|	236	E:3e-76	hypothetical protein POPTR_0013s04080g [Populus trichocarpa]	.	.	.	.	.	.	.	.	.	.	.	.	.	.	.	.	.	.	.
f2p60_727_13814	-1.35207	9.0873e-06	down	yes	-0.499868	0.0718706	down	no	-1.09615	0.000115609	down	yes	-0.485451	0.063544	down	no	-0.651597	0.00751048	down	no	.	.	gi|159459648|gb|AC214035.1|	699	E:0	Populus trichocarpa clone POP073-O07, complete sequence	gi|566259192|ref|XP_006389158.1|	157	E:2e-45	hypothetical protein POPTR_0040s00195g [Populus trichocarpa]	.	.	.	.	.	.	.	.	.	.	.	.	.	.	.	.	.	.	.
f2p60_720_33548	1.24249	6.81037e-05	up	yes	0.682153	0.0376129	up	no	0.372475	0.248272	up	no	0.247598	0.423016	up	no	0.469228	0.0944211	up	no	.	.	gi|147860047|emb|AM455786.2|	99	E:2e-17	Vitis vinifera contig VV78X270576.8, whole genome shotgun sequence	.	.	.	.	.	.	.	.	.	.	.	.	.	.	.	.	.	.	.	.	.	.	.
f2p60_719_336433	1.72677	2.50407e-15	up	yes	1.57918	1.7041e-13	up	yes	0.788962	0.000767095	up	no	0.457127	0.0535316	up	no	0.0671345	0.789865	up	no	Gene.16169::PuPacbio_f2p60_719_transcript33643_g13::g.16169::m.16169	85-564[+]	gi|566209290|ref|XM_002323392.2|	1218	E:0	Populus trichocarpa hypothetical protein (POPTR_0016s08060g) mRNA, complete cds	gi|566209291|ref|XP_002323428.2|	320	E:1e-108	hypothetical protein POPTR_0016s08060g [Populus trichocarpa]	.	.	.	.	.	.	.	.	PF14009.5	DUF4228	Domain of unknown function (DUF4228)	.	.	.	.	.	.	.	.
f2p60_717_33567	-0.710098	3.95813e-06	down	no	-1.14834	1.52426e-14	down	yes	-0.107749	0.459893	down	no	-0.633275	2.24043e-05	down	no	-0.405459	0.00612259	down	no	.	.	gi|566231958|ref|XM_002325385.2|	904	E:0	Populus trichocarpa hypothetical protein (POPTR_0019s05110g) mRNA, complete cds	gi|823195258|ref|XP_012492568.1|	50.4	E:6e-06	PREDICTED: arabinogalactan peptide 13-like [Gossypium raimondii]	.	.	.	.	.	.	.	.	.	.	.	.	.	.	.	.	.	.	.
f2p60_713_33646	-0.95111	4.18559e-49	down	no	0.393111	5.35122e-14	up	no	1.65541	7.65819e-112	up	yes	2.09531	0	up	yes	2.93833	2.18821e-170	up	yes	.	.	gi|566213289|ref|XM_006373411.1|	1035	E:0	Populus trichocarpa hypothetical protein (POPTR_0017s14100g) mRNA, complete cds	gi|566213290|ref|XP_006373473.1|	84.3	E:6e-18	hypothetical protein POPTR_0017s14100g [Populus trichocarpa]	.	.	.	.	.	.	.	.	.	.	.	.	.	.	.	.	.	.	.
f2p60_709_33863	-0.845149	1.95676e-08	down	no	-1.23478	1.07324e-16	down	yes	-0.7133	2.30972e-05	down	no	-0.281349	NA	down	no	0.0343693	0.807892	up	no	Gene.16222::PuPacbio_f2p60_709_transcript33863_g7::g.16222::m.16222	57-365[+]	gi|566166799|ref|XM_002305386.2|	1064	E:0	Populus trichocarpa hypothetical protein (POPTR_0004s16060g) mRNA, complete cds	gi|224077820|ref|XP_002305422.1|	177	E:3e-53	hypothetical protein POPTR_0004s16060g [Populus trichocarpa]	.	.	.	.	.	.	.	.	PF10950.7	Organ_specific	Organ specific protein	.	.	.	.	.	.	.	.
f2p60_701_33823	1.32108	4.18994e-09	up	yes	0.589242	0.012495	up	no	0.204523	0.427673	up	no	0.0700938	0.772466	up	no	-0.254192	0.307176	down	no	.	.	gi|743813837|ref|XM_011021296.1|	1085	E:0	PREDICTED: Populus euphratica uncharacterized LOC105122277 (LOC105122277), transcript variant X1, mRNA	gi|224092278|ref|XP_002309540.1|	148	E:2e-42	hypothetical protein POPTR_0006s25420g [Populus trichocarpa]	.	.	.	.	.	.	.	.	.	.	.	.	.	.	.	.	.	.	.
f2p60_701_33820	0.595756	0.0866557	up	no	1.18814	5.77519e-05	up	yes	0.482458	0.11696	up	no	-0.670911	0.0357514	down	no	-0.424572	0.182458	down	no	Gene.16209::PuPacbio_f2p60_701_transcript33820_g1::g.16209::m.16209	3-359[+]	gi|566227523|ref|XM_002325732.2|	845	E:0	Populus trichocarpa hypothetical protein (POPTR_0019s03420g) mRNA, complete cds	gi|566227513|ref|XP_006371085.1|	127	E:2e-33	hypothetical protein POPTR_0019s03410g [Populus trichocarpa]	.	.	.	.	.	.	.	.	.	.	.	.	.	.	ExpAA=20.59^PredHel=1^Topology=i13-35o	.	.	.	.
f2p60_676_14268	2.53832	9.10466e-71	up	yes	1.75014	2.27191e-31	up	yes	1.37526	2.72876e-15	up	yes	1.30639	1.38986e-14	up	yes	0.399549	0.0396201	up	no	Gene.7306::PuPacbio_f2p60_676_transcript14268_g2::g.7306::m.7306	45-368[+]	gi|566181068|ref|XM_006380706.1|	1037	E:0	Populus trichocarpa hypothetical protein (POPTR_0007s13150g) mRNA, complete cds	gi|224094827|ref|XP_002310254.1|	217	E:4e-69	hypothetical protein POPTR_0007s13160g [Populus trichocarpa]	.	.	.	.	.	.	.	.	.	.	.	.	.	.	.	.	.	.	.
f2p60_669_34271	2.49474	1.47805e-59	up	yes	3.26188	3.58247e-144	up	yes	2.58141	6.93139e-57	up	yes	2.27594	1.45084e-49	up	yes	1.81494	1.25946e-20	up	yes	Gene.16328::PuPacbio_f2p60_669_transcript34271_g9::g.16328::m.16328	62-472[+]	gi|566188692|ref|XM_006378017.1|	1092	E:0	Populus trichocarpa hypothetical protein (POPTR_0010s01900g) mRNA, complete cds	gi|566188693|ref|XP_006378079.1|	239	E:1e-77	hypothetical protein POPTR_0010s01900g [Populus trichocarpa]	.	.	.	.	.	.	.	.	.	.	.	.	.	.	.	.	.	.	.
f2p60_666_343173	2.73337	4.96373e-46	up	yes	2.76999	1.55803e-51	up	yes	2.19299	3.83446e-28	up	yes	1.05979	4.86581e-05	up	yes	-0.0728303	0.799108	down	no	Gene.16340::PuPacbio_f2p60_666_transcript34317_g13::g.16340::m.16340	83-421[+]	gi|566151802|ref|XM_002300231.2|	1050	E:0	Populus trichocarpa hypothetical protein (POPTR_0001s30200g) mRNA, complete cds	gi|224060774|ref|XP_002300267.1|	188	E:1e-57	hypothetical protein POPTR_0001s30200g [Populus trichocarpa]	.	.	.	.	.	.	.	.	.	.	.	.	.	.	.	.	.	.	.
f2p60_666_14400	-0.370475	0.448786	down	no	2.38941	8.55998e-15	up	yes	-0.0113129	0.976114	down	no	0.135796	0.683568	up	no	0.814199	0.0100978	up	no	.	.	gi|566157577|ref|XM_002302378.2|	1155	E:0	Populus trichocarpa hypothetical protein (POPTR_0002s12050g) mRNA, complete cds	gi|224067218|ref|XP_002302414.1|	162	E:3e-48	hypothetical protein POPTR_0002s12050g [Populus trichocarpa]	.	.	.	.	.	.	.	.	.	.	.	.	.	.	.	.	.	.	.
f2p60_663_343542	1.08787	0.00028848	up	yes	1.42313	7.92003e-08	up	yes	0.431083	0.141859	up	no	1.25228	2.04308e-06	up	yes	-0.55505	0.0685671	down	no	.	.	gi|566150631|ref|XM_006369414.1|	464	E:2e-127	Populus trichocarpa hypothetical protein (POPTR_0001s23800g) mRNA, complete cds	gi|566150632|ref|XP_006369476.1|	176	E:3e-53	hypothetical protein POPTR_0001s23800g [Populus trichocarpa]	.	.	.	.	.	.	.	.	.	.	.	.	.	.	.	.	.	.	.
f2p60_662_14421	-0.259626	0.187338	down	no	-1.24797	3.83638e-09	down	yes	-1.22466	4.44016e-09	down	yes	-0.59327	0.00181351	down	no	-0.653289	0.000686214	down	no	.	.	gi|566174295|ref|XM_006380915.1|	1085	E:0	Populus trichocarpa hypothetical protein (POPTR_0006s03620g) mRNA, complete cds	.	.	.	.	.	.	.	.	.	.	.	.	.	.	.	.	.	.	.	.	.	.	.
f2p60_651_34449	0.465577	0.000284955	up	no	1.24458	4.64635e-31	up	yes	0.747061	1.5824e-09	up	no	1.20507	2.28798e-23	up	yes	1.16835	NA	up	no	Gene.16367::PuPacbio_f2p60_651_transcript34449_g7::g.16367::m.16367	64-432[+]	gi|566166700|ref|XM_006384417.1|	1092	E:0	Populus trichocarpa cytochrome b6f complex subuni family protein (POPTR_0004s15440g) mRNA, complete cds	gi|743923166|ref|XP_011005667.1|	178	E:1e-53	PREDICTED: uncharacterized protein LOC105111889 [Populus euphratica]	.	.	.	.	PETM_SPIOL	57.8	E:8e-11	RecName: Full=Cytochrome b6-f complex subunit 7;^Eukaryota; Viridiplantae; Streptophyta; Embryophyta; Tracheophyta; Spermatophyta; Magnoliophyta; eudicotyledons; Gunneridae; Pentapetalae; Caryophyllales; Chenopodiaceae; Chenopodioideae; Anserineae; Spinacia	PF08041.10	PetM	PetM family of cytochrome b6f complex subunit 7	.	.	.	ExpAA=22.14^PredHel=1^Topology=o90-112i	.	GO:0055114|oxidation-reduction process;GO:0015979|photosynthesis	.	GO:0009535|chloroplast thylakoid membrane;GO:0009512|cytochrome b6f complex;GO:0016021|integral component of membraneGO:0009512|cytochrome b6f complex
f2p60_651_14402	-1.18752	9.14879e-13	down	yes	0.64612	1.61731e-07	up	no	-0.794398	2.24052e-07	down	no	-0.740804	NA	down	no	-1.39141	2.07222e-16	down	yes	.	.	gi|566212006|ref|XM_002323700.2|	568	E:1e-158	Populus trichocarpa hydroxyproline-rich glycoprotein (POPTR_0017s07440g) mRNA, complete cds	.	.	.	.	.	.	.	.	.	.	.	.	.	.	.	.	.	.	.	.	.	.	.
f2p60_649_34521	2.32039	3.21719e-217	up	yes	0.566648	2.16296e-19	up	no	0.565065	2.54046e-07	up	no	0.585204	7.22331e-06	up	no	0.462251	0.00280209	up	no	.	.	gi|566213347|ref|XM_006373440.1|	1033	E:0	Populus trichocarpa ABA-inducible family protein (POPTR_0017s14310g) mRNA, complete cds	gi|566213348|ref|XP_006373502.1|	145	E:2e-41	ABA-inducible family protein [Populus trichocarpa]	.	.	.	.	.	.	.	.	.	.	.	.	.	.	.	.	.	.	.
f2p60_646_346812	3.13316	4.58326e-20	up	yes	1.78206	1.2568e-05	up	yes	1.39416	2.82457e-07	up	yes	0.648062	0.0349303	up	no	1.06337	0.000435909	up	yes	.	.	gi|118488253|gb|EF147949.1|	937	E:0	Populus trichocarpa clone WS0126_C24 unknown mRNA	gi|566213348|ref|XP_006373502.1|	145	E:2e-41	ABA-inducible family protein [Populus trichocarpa]	.	.	.	.	.	.	.	.	.	.	.	.	.	.	.	.	.	.	.
f2p60_646_34614	1.27859	8.08491e-09	up	yes	1.98158	7.82879e-26	up	yes	1.96608	2.35717e-23	up	yes	1.15116	0.000133773	up	yes	0.295674	0.223738	up	no	.	.	gi|566176050|ref|XM_006381394.1|	883	E:0	Populus trichocarpa hypothetical protein (POPTR_0006s13010g) mRNA, complete cds	gi|566176051|ref|XP_006381456.1|	65.5	E:1e-11	hypothetical protein POPTR_0006s13010g [Populus trichocarpa]	.	.	.	.	.	.	.	.	.	.	.	.	.	.	.	.	.	.	.
f2p60_642_14658	0.828803	0.0391099	up	no	1.14011	0.00130614	up	yes	0.228895	0.518164	up	no	0.214344	0.511789	up	no	0.206985	0.520672	up	no	.	.	gi|743900123|ref|XR_844873.1|	1118	E:0	PREDICTED: Populus euphratica uncharacterized LOC105138841 (LOC105138841), transcript variant X1, ncRNA	gi|763742283|gb|KJB09782.1|	123	E:2e-29	hypothetical protein B456_001G165500 [Gossypium raimondii]	.	.	.	.	.	.	.	.	.	.	.	.	.	.	.	.	.	.	.
f2p60_636_15060	-1.3703	4.57196e-29	down	yes	-2.10301	4.60684e-61	down	yes	-1.16806	2.45382e-18	down	yes	-2.22898	4.98515e-57	down	yes	-1.85047	8.68715e-14	down	yes	.	.	gi|566254362|ref|XM_006387407.1|	953	E:0	Populus trichocarpa hypothetical protein (POPTR_1008s00230g) mRNA, complete cds	gi|566244355|ref|XP_006371636.1|	146	E:2e-51	hypothetical protein POPTR_0019s13960g, partial [Populus trichocarpa]	.	.	.	.	.	.	.	.	.	.	.	.	.	.	.	.	.	.	.
f2p60_631_34832	0.604268	1.86537e-05	up	no	0.949313	2.99257e-14	up	no	1.75735	4.36722e-49	up	yes	1.93005	6.68292e-58	up	yes	1.1476	1.55965e-13	up	yes	Gene.16441::PuPacbio_f2p60_631_transcript34832_g7::g.16441::m.16441	3-374[+]	gi|566191822|ref|XM_002315155.2|	955	E:0	Populus trichocarpa protease inhibitor/seed storage/lipid transfer family protein (POPTR_0010s20360g) mRNA, complete cds	gi|743879781|ref|XP_011036038.1|	241	E:7e-79	PREDICTED: putative lipid-transfer protein DIR1 [Populus euphratica]	.	.	.	.	.	.	.	.	PF00234.21	Tryp_alpha_amyl	Protease inhibitor/seed storage/LTP family	.	.	.	.	.	.	.	.
f2p60_629_14695	0.684119	4.26596e-11	up	no	1.66592	2.45517e-93	up	yes	0.983938	6.72608e-22	up	no	1.28895	NA	up	no	0.410702	NA	up	no	.	.	gi|566203580|ref|XM_002320878.2|	606	E:2e-170	Populus trichocarpa hypothetical protein (POPTR_0014s10440g) mRNA, complete cds	gi|566203582|ref|XP_006375405.1|	136	E:3e-38	hypothetical protein POPTR_0014s10450g [Populus trichocarpa]	.	.	.	.	.	.	.	.	.	.	.	.	.	.	.	.	.	.	.
f2p60_626_14752	-1.36905	0.000111281	down	yes	-1.14192	0.000466179	down	yes	-1.35164	1.26771e-05	down	yes	-0.848384	0.00631645	down	no	-1.23468	1.76949e-05	down	yes	.	.	gi|566181605|ref|XM_002310906.2|	427	E:2e-116	Populus trichocarpa hypothetical protein (POPTR_0008s00830g) mRNA, complete cds	gi|566255119|ref|XP_006387690.1|	135	E:9e-38	hypothetical protein POPTR_0672s00210g [Populus trichocarpa]	.	.	.	.	.	.	.	.	.	.	.	.	.	.	.	.	.	.	.
f2p60_624_34904	2.13918	1.00072e-14	up	yes	1.83076	6.82884e-11	up	yes	1.07324	0.000668385	up	yes	0.643064	0.0536011	up	no	0.808574	0.0105203	up	no	Gene.16461::PuPacbio_f2p60_624_transcript34904_g5::g.16461::m.16461	2-325[+]	gi|566196709|ref|XM_002317663.2|	536	E:3e-149	Populus trichocarpa hypothetical protein (POPTR_0012s04100g) mRNA, partial cds	gi|566196710|ref|XP_002317699.2|	185	E:2e-56	hypothetical protein POPTR_0012s04100g, partial [Populus trichocarpa]	.	.	.	.	.	.	.	.	.	.	.	.	.	.	.	.	.	.	.
f2p60_618_14804	-0.277539	0.30965	down	no	1.17216	3.21521e-09	up	yes	1.48953	7.05724e-15	up	yes	-0.739967	0.023613	down	no	-2.60055	8.02813e-17	down	yes	.	.	gi|743820144|ref|XM_011022763.1|	859	E:0	PREDICTED: Populus euphratica uncharacterized LOC105123251 (LOC105123251), mRNA	gi|743820145|ref|XP_011021065.1|	177	E:3e-54	PREDICTED: uncharacterized protein LOC105123251 [Populus euphratica]	.	.	.	.	.	.	.	.	.	.	.	.	.	.	.	.	.	.	.
f2p60_597_35251	-1.36938	1.18874e-30	down	yes	-0.518989	1.59665e-07	down	no	0.157965	0.171421	up	no	0.0779034	0.393618	up	no	0.26395	0.031703	up	no	.	.	gi|118484635|gb|EF146089.1|	782	E:0	Populus trichocarpa clone WS0115_H08 unknown mRNA	gi|743894075|ref|XP_011040285.1|	88.6	E:6e-20	PREDICTED: programmed cell death protein 4-like [Populus euphratica]	.	.	.	.	.	.	.	.	.	.	.	.	.	.	.	.	.	.	.
f2p60_593_353342	4.58696	1.86458e-30	up	yes	5.60141	2.00527e-56	up	yes	5.5093	2.15299e-79	up	yes	4.79093	2.08106e-67	up	yes	1.90167	8.41218e-09	up	yes	.	.	gi|566161094|ref|XM_006385433.1|	776	E:0	Populus trichocarpa hypothetical protein (POPTR_0003s05980g) mRNA, complete cds	gi|566161095|ref|XP_006385495.1|	83.2	E:6e-18	hypothetical protein POPTR_0003s05980g [Populus trichocarpa]	.	.	.	.	.	.	.	.	.	.	.	.	.	.	.	.	.	.	.
f2p60_593_35317	0.886705	2.06736e-17	up	no	2.15252	7.99995e-160	up	yes	1.65165	1.4872e-52	up	yes	1.56897	NA	up	no	0.316744	0.112267	up	no	.	.	gi|566203583|ref|XM_002320880.2|	327	E:2e-86	Populus trichocarpa hypothetical protein (POPTR_0014s10460g) mRNA, partial cds	gi|566203584|ref|XP_002320916.2|	119	E:7e-32	hypothetical protein POPTR_0014s10460g, partial [Populus trichocarpa]	.	.	.	.	.	.	.	.	.	.	.	.	.	.	.	.	.	.	.
f2p60_586_15182	-1.46812	7.38342e-07	down	yes	-1.34331	1.05592e-06	down	yes	-1.12699	2.18285e-05	down	yes	-1.0277	0.000152418	down	yes	-0.491631	0.0470335	down	no	Gene.7469::PuPacbio_f2p60_586_transcript15182_g5::g.7469::m.7469	2-328[+]	gi|566200846|ref|XM_006376277.1|	867	E:0	Populus trichocarpa hypothetical protein (POPTR_0013s12160g) mRNA, complete cds	gi|566200847|ref|XP_006376339.1|	117	E:1e-30	hypothetical protein POPTR_0013s12160g [Populus trichocarpa]	.	.	.	.	.	.	.	.	.	.	.	.	.	.	.	.	.	.	.
f2p60_569_15331	1.17197	1.69687e-07	up	yes	0.606369	0.00617299	up	no	0.3258	0.149129	up	no	0.203415	0.406294	up	no	-0.685805	0.00462994	down	no	Gene.7484::PuPacbio_f2p60_569_transcript15331_g4::g.7484::m.7484	2-421[+]	gi|158508742|gb|AC213016.1|	953	E:0	Populus trichocarpa clone POP038-D19, complete sequence	gi|224117780|ref|XP_002317666.1|	166	E:4e-50	hypothetical protein POPTR_0011s15480g [Populus trichocarpa]	.	.	.	.	.	.	.	.	.	.	.	.	.	.	.	.	.	.	.
f2p60_565_35723	1.10627	5.11099e-11	up	yes	0.446545	0.0107505	up	no	0.042581	0.819639	up	no	-0.103321	0.597047	down	no	-0.220129	0.306474	down	no	.	.	gi|118482692|gb|EF145071.1|	732	E:0	Populus trichocarpa clone WS0111_O15 unknown mRNA	gi|743856180|ref|XP_011029846.1|	95.1	E:9e-22	PREDICTED: uncharacterized protein LOC105129462 [Populus euphratica]	.	.	.	.	.	.	.	.	.	.	.	.	.	.	.	.	.	.	.
f2p60_562_35732	0.67652	0.000487835	up	no	-0.611911	0.00477833	down	no	-0.263485	0.208068	down	no	-0.600762	0.00400322	down	no	-1.27409	1.11984e-08	down	yes	.	.	gi|566208813|ref|XM_006373710.1|	911	E:0	Populus trichocarpa hypothetical protein (POPTR_0016s05260g) mRNA, complete cds	gi|566208814|ref|XP_006373772.1|	121	E:8e-33	hypothetical protein POPTR_0016s05260g [Populus trichocarpa]	.	.	.	.	.	.	.	.	.	.	.	.	.	.	.	.	.	.	.
f2p60_561_357721	0.198555	0.481523	up	no	3.30097	1.85455e-80	up	yes	4.78585	2.86131e-251	up	yes	4.31186	9.86946e-217	up	yes	5.1718	0	up	yes	Gene.16566::PuPacbio_f2p60_561_transcript35772_g11::g.16566::m.16566	1-297[-]	gi|743923349|ref|XR_839679.1|	828	E:0	PREDICTED: Populus euphratica uncharacterized LOC105111944 (LOC105111944), ncRNA	gi|224089519|ref|XP_002308743.1|	119	E:1e-41	hypothetical protein POPTR_0006s00430g [Populus trichocarpa]	.	.	.	.	.	.	.	.	.	.	.	.	.	.	.	.	.	.	.
f2p60_559_35790	2.67835	1.88364e-06	up	yes	3.33709	1.2584e-10	up	yes	1.69553	1.27614e-05	up	yes	0.576758	0.0220128	up	no	0.161603	0.277925	up	no	.	.	gi|566170373|ref|XM_002307130.2|	575	E:6e-161	Populus trichocarpa hypothetical protein (POPTR_0005s09450g) mRNA, complete cds	gi|224083900|ref|XP_002307166.1|	161	E:3e-48	hypothetical protein POPTR_0005s09450g [Populus trichocarpa]	.	.	.	.	.	.	.	.	.	.	.	.	.	.	.	.	.	.	.
f2p60_547_359674	0.577153	8.48633e-05	up	no	1.70942	1.21229e-49	up	yes	1.25251	4.49644e-19	up	yes	0.882498	8.8324e-11	up	no	1.3023	3.74182e-20	up	yes	Gene.16588::PuPacbio_f2p60_547_transcript35967_g14::g.16588::m.16588	79-414[+]	gi|566148789|ref|XM_002299282.2|	863	E:0	Populus trichocarpa hypothetical protein (POPTR_0001s13640g) mRNA, complete cds	gi|224057776|ref|XP_002299318.1|	193	E:2e-60	hypothetical protein POPTR_0001s13640g [Populus trichocarpa]	.	.	.	.	.	.	.	.	.	.	.	.	.	.	.	.	.	.	.
f2p60_547_35936	-1.25766	7.76322e-06	down	yes	-0.996371	0.000104538	down	no	-0.410891	0.0734247	down	no	0.0764259	0.717926	up	no	-0.293838	0.180476	down	no	.	.	gi|566169883|ref|XM_006382811.1|	651	E:0	Populus trichocarpa hypothetical protein (POPTR_0005s06700g) mRNA, complete cds	gi|566169884|ref|XP_006382873.1|	102	E:2e-25	hypothetical protein POPTR_0005s06700g [Populus trichocarpa]	.	.	.	.	.	.	.	.	.	.	.	.	.	.	.	.	.	.	.
f2p60_530_15646	-1.0037	0.0126272	down	yes	-1.61186	8.15529e-05	down	yes	-0.892871	0.00935456	down	no	-0.655193	0.0450471	down	no	-0.443029	0.181933	down	no	.	.	gi|111154126|gb|AC184095.2|	874	E:0	Populus trichocarpa clone Pop1-65H17, complete sequence	gi|566150548|ref|XP_006369435.1|	59.7	E:1e-15	hypothetical protein POPTR_0001s23385g [Populus trichocarpa]	.	.	.	.	.	.	.	.	.	.	.	.	.	.	.	.	.	.	.
f2p60_518_15682	1.02618	0.000730892	up	yes	1.43617	1.55242e-07	up	yes	0.102221	0.744683	up	no	0.811543	0.00300594	up	no	0.616243	0.0414981	up	no	.	.	gi|566213287|ref|XM_006373410.1|	551	E:1e-153	Populus trichocarpa hypothetical protein (POPTR_0017s14090g) mRNA, complete cds	gi|566213288|ref|XP_006373472.1|	125	E:1e-34	hypothetical protein POPTR_0017s14090g [Populus trichocarpa]	.	.	.	.	.	.	.	.	.	.	.	.	.	.	.	.	.	.	.
f2p60_514_36322	-2.39137	3.61818e-27	down	yes	-0.262662	0.124046	down	no	0.169939	0.384228	up	no	0.338627	0.0599597	up	no	0.317561	0.0706605	up	no	.	.	gi|118489836|gb|EF148760.1|	745	E:0	Populus trichocarpa x Populus deltoides clone WS0137_H13 unknown mRNA	gi|566172203|ref|XP_006383564.1|	133	E:2e-37	hypothetical protein POPTR_0005s19400g [Populus trichocarpa]	.	.	.	.	.	.	.	.	.	.	.	.	.	.	.	.	.	.	.
f2p60_502_36480	-0.376293	0.153342	down	no	-1.16663	5.58605e-05	down	yes	-0.901238	0.000396382	down	no	-0.212246	0.366959	down	no	-0.0861818	0.712782	down	no	.	.	gi|566146650|ref|XM_006368275.1|	854	E:0	Populus trichocarpa hypothetical protein (POPTR_0001s01750g) mRNA, complete cds	gi|566146651|ref|XP_006368337.1|	137	E:2e-38	hypothetical protein POPTR_0001s01750g [Populus trichocarpa]	.	.	.	.	.	.	.	.	.	.	.	.	.	.	.	.	.	.	.
f2p60_497_36602	1.08138	9.68624e-08	up	yes	0.88706	2.64621e-06	up	no	0.392623	0.0606649	up	no	0.234088	0.273238	up	no	-0.0484549	0.826067	down	no	.	.	gi|743796025|ref|XR_839491.1|	514	E:1e-142	PREDICTED: Populus euphratica uncharacterized LOC105110500 (LOC105110500), ncRNA	.	.	.	.	.	.	.	.	.	.	.	.	.	.	.	.	.	.	.	.	.	.	.
f2p60_497_15963	-0.88267	4.44825e-11	down	no	-0.558724	6.22967e-07	down	no	-1.11304	1.16768e-16	down	yes	-1.3451	4.31831e-25	down	yes	-1.42488	6.403e-19	down	yes	.	.	gi|743944558|ref|XR_841304.1|	712	E:0	PREDICTED: Populus euphratica uncharacterized LOC105120326 (LOC105120326), ncRNA	gi|566196845|ref|XP_006376732.1|	139	E:8e-40	hypothetical protein POPTR_0012s04920g [Populus trichocarpa]	.	.	.	.	.	.	.	.	.	.	.	.	.	.	.	.	.	.	.
f2p60_486_15933	-2.37667	5.37613e-79	down	yes	-4.12937	1.94128e-146	down	yes	-2.47787	1.00632e-74	down	yes	-1.3272	NA	down	no	-1.39299	1.83455e-05	down	yes	.	.	gi|566179861|ref|XM_002310552.2|	725	E:0	Populus trichocarpa hypothetical protein (POPTR_0007s06110g) mRNA, complete cds	gi|566179862|ref|XP_002310588.2|	106	E:3e-27	hypothetical protein POPTR_0007s06110g [Populus trichocarpa]	.	.	.	.	.	.	.	.	.	.	.	.	.	.	.	.	.	.	.
f2p60_483_15925	1.06521	0.00162316	up	yes	0.874054	0.00959575	up	no	0.561794	0.0750223	up	no	0.509683	0.0867379	up	no	0.281538	0.350633	up	no	.	.	gi|566189177|ref|XM_002315652.2|	763	E:0	Populus trichocarpa hypothetical protein (POPTR_0010s05250g) mRNA, complete cds	gi|743903860|ref|XP_011045288.1|	80.5	E:8e-16	PREDICTED: uncharacterized protein LOC105140244 [Populus euphratica]	.	.	.	.	.	.	.	.	.	.	.	.	.	.	.	.	.	.	.
f2p60_479_16077	1.72443	5.30159e-05	up	yes	0.511595	0.278169	up	no	0.896006	0.0163608	up	no	0.342272	0.307236	up	no	0.0425237	0.897111	up	no	.	.	gi|162952069|gb|AC215938.1|	342	E:6e-91	Populus trichocarpa clone ACSB1393-E06, complete sequence	gi|566220954|ref|XP_002325713.2|	51.6	E:8e-07	hypothetical protein POPTR_0019s00860g [Populus trichocarpa]	.	.	.	.	.	.	.	.	.	.	.	.	.	.	.	.	.	.	.
f2p60_469_16117	0.242606	0.642047	up	no	0.896654	0.0483419	up	no	1.3867	0.000139656	up	yes	0.279672	0.401727	up	no	0.304032	0.359147	up	no	.	.	gi|566210141|ref|XM_006373972.1|	625	E:5e-176	Populus trichocarpa hypothetical protein (POPTR_0016s13650g) mRNA, complete cds	gi|743866874|ref|XP_011032585.1|	58.2	E:1e-08	PREDICTED: uncharacterized protein LOC105131356 [Populus euphratica]	.	.	.	.	.	.	.	.	.	.	.	.	.	.	.	.	.	.	.
f2p60_465_371280	1.93464	2.44039e-51	up	yes	1.11268	2.61634e-19	up	yes	0.57956	0.00039251	up	no	-0.112855	0.470037	down	no	-0.172943	0.250006	down	no	.	.	gi|566152286|ref|XM_002298642.2|	658	E:0	Populus trichocarpa hypothetical protein (POPTR_0001s32770g) mRNA, complete cds	.	.	.	.	.	.	.	.	.	.	.	.	.	.	.	.	.	.	.	.	.	.	.
f2p60_460_369271	-0.480048	0.117232	down	no	-1.34837	3.44294e-05	down	yes	-0.491786	0.0931273	down	no	-0.634117	0.0299242	down	no	-0.571849	0.0396306	down	no	Gene.16649::PuPacbio_f2p60_460_transcript36927_g11::g.16649::m.16649	3-332[+]	gi|743890591|ref|XM_011040789.1|	625	E:5e-176	PREDICTED: Populus euphratica uncharacterized LOC105135762 (LOC105135762), transcript variant X3, mRNA	gi|566196832|ref|XP_002317893.2|	229	E:7e-70	hypothetical protein POPTR_0012s04840g [Populus trichocarpa]	.	.	.	.	.	.	.	.	.	.	.	.	.	.	.	.	.	.	.
f2p60_454_36984	-1.80508	1.17259e-15	down	yes	-1.72717	2.26365e-15	down	yes	-1.84248	2.33603e-16	down	yes	-0.915585	0.0013269	down	no	-1.46936	1.97585e-08	down	yes	.	.	gi|861549120|gb|KP403509.1|	719	E:0	Populus tomentosa genotype 21 miR397a miRNA gene, complete sequence	gi|566193612|ref|XP_006377298.1|	198	E:5e-63	hypothetical protein POPTR_0011s04090g [Populus trichocarpa]	.	.	.	.	.	.	.	.	.	.	.	.	.	.	.	.	.	.	.
f2p60_452_37068	1.75975	7.40345e-17	up	yes	1.64832	1.40736e-20	up	yes	1.10465	4.85462e-08	up	yes	1.02297	1.89097e-06	up	yes	0.47669	0.0204702	up	no	.	.	gi|403324483|gb|JX552713.1|	612	E:4e-172	Populus fremontii isolate COMT2_15-B_3 caffeate O-methyltransferase (COMT2) gene, partial cds	.	.	.	.	.	.	.	.	.	.	.	.	.	.	.	.	.	.	.	.	.	.	.
f2p60_423_37291	0.949289	0.0917271	up	no	1.70909	0.00090213	up	yes	0.888576	0.0231875	up	no	0.948021	0.00404249	up	no	0.972165	0.00301521	up	no	.	.	gi|743926770|ref|XM_011009258.1|	525	E:5e-146	PREDICTED: Populus euphratica probable pectinesterase/pectinesterase inhibitor 51 (LOC105113190), mRNA	gi|566169804|ref|XP_002306241.2|	59.7	E:2e-08	pectinesterase family protein [Populus trichocarpa]	.	.	.	.	.	.	.	.	.	.	.	.	.	.	.	.	.	.	.
f2p60_417_37279	-0.243039	0.365652	down	no	-1.16118	7.46888e-05	down	yes	-0.71943	0.0224595	down	no	-0.670054	0.0101299	down	no	-0.608383	0.0302659	down	no	.	.	gi|118485248|gb|EF146408.1|	708	E:0	Populus trichocarpa clone WS0117_P14 unknown mRNA	gi|118485249|gb|ABK94484.1|	84	E:3e-19	unknown [Populus trichocarpa]	.	.	.	.	.	.	.	.	.	.	.	.	.	.	.	.	.	.	.
f2p60_415_37510	-0.978215	3.92529e-07	down	no	-1.2133	3.9675e-10	down	yes	-0.599683	0.00119535	down	no	-0.29796	0.123515	down	no	0.423858	0.0195593	up	no	.	.	gi|57903496|gb|AY728388.1|	303	E:2e-79	Populus trichocarpa microRNA ptr-MIR473a gene, complete sequence	.	.	.	.	.	.	.	.	.	.	.	.	.	.	.	.	.	.	.	.	.	.	.
f2p60_408_37605	1.13628	0.0233033	up	yes	1.84874	1.78876e-05	up	yes	1.02578	0.00787582	up	yes	1.35499	5.39892e-05	up	yes	0.500392	0.124619	up	no	.	.	gi|566203580|ref|XM_002320878.2|	318	E:8e-84	Populus trichocarpa hypothetical protein (POPTR_0014s10440g) mRNA, complete cds	.	.	.	.	.	.	.	.	.	.	.	.	.	.	.	.	.	.	.	.	.	.	.
f2p60_3860_557	-1.9326	5.16623e-174	down	yes	-1.49408	1.13042e-112	down	yes	-1.05622	1.7791e-06	down	yes	-1.74634	1.04122e-60	down	yes	-1.47504	2.3316e-27	down	yes	Gene.579::PuPacbio_f2p60_3860_transcript557_g1::g.579::m.579	111-1385[+]	gi|743899006|ref|XM_011044489.1|	1688	E:0	PREDICTED: Populus euphratica extensin-2-like (LOC105138427), mRNA	gi|743899007|ref|XP_011042791.1|	242	E:3e-64	PREDICTED: extensin-2-like [Populus euphratica]	.	.	.	.	.	.	.	.	.	.	.	.	.	.	.	.	.	.	.
f2p60_380_37847	-1.35415	0.000985402	down	yes	-1.78803	1.90385e-05	down	yes	-1.94927	9.48283e-08	down	yes	-1.10061	0.000741018	down	yes	-0.213737	0.49762	down	no	.	.	gi|46850180|gb|AY594295.1|	442	E:4e-121	Populus trichocarpa x Populus deltoides metallothionein 1a (MT1a) mRNA, complete cds	.	.	.	.	.	.	.	.	.	.	.	.	.	.	.	.	.	.	.	.	.	.	.
f2p60_374_37875	1.47507	0.00253069	up	yes	3.06306	3.31592e-16	up	yes	2.94665	7.71455e-20	up	yes	3.40285	1.48508e-34	up	yes	2.4936	3.85661e-16	up	yes	.	.	gi|242346704|gb|GQ184816.1|	627	E:1e-176	Populus trichocarpa x Populus deltoides Kunitz-type protease inhibitor KPI-F4 mRNA, complete cds	gi|340008382|gb|AEK26931.1|	159	E:7e-47	Kunitz-type trypsin inhibitor C5 [Populus nigra]	.	.	.	.	.	.	.	.	.	.	.	.	.	.	.	.	.	.	.
f2p60_365_37972	-1.25561	0.00664821	down	yes	-0.764971	0.0697015	down	no	-0.712475	0.0514691	down	no	-0.207156	0.525867	down	no	-0.0310847	0.923459	down	no	.	.	gi|566195487|ref|XM_002316979.2|	606	E:1e-170	Populus trichocarpa Photosystem II 10 kDa polypeptide family protein (POPTR_0011s14540g) mRNA, complete cds	gi|743860031|ref|XP_011030749.1|	52	E:7e-07	PREDICTED: photosystem II 10 kDa polypeptide, chloroplastic-like [Populus euphratica]	.	.	.	.	.	.	.	.	.	.	.	.	.	.	.	.	.	.	.
f2p60_355_38068	-0.963647	0.00226955	down	no	-0.691948	0.0432273	down	no	-0.985183	0.00104958	down	no	-1.50127	5.5722e-06	down	yes	-0.394777	0.105862	down	no	.	.	gi|991820730|gb|KU056812.1|	580	E:8e-163	Salix suchowensis mitochondrion, complete genome	gi|527209880|gb|EPS74490.1|	191	E:1e-59	hypothetical protein M569_00256 [Genlisea aurea]	.	.	.	.	.	.	.	.	.	.	.	.	.	.	.	.	.	.	.
f2p60_354_38174	2.38271	2.75194e-28	up	yes	1.39439	7.30074e-09	up	yes	0.509462	0.065761	up	no	-0.0385778	0.891407	down	no	-0.135613	0.625456	down	no	.	.	gi|566164322|ref|XM_006383854.1|	549	E:2e-153	Populus trichocarpa hypothetical protein (POPTR_0004s01190g) mRNA, complete cds	.	.	.	.	.	.	.	.	.	.	.	.	.	.	.	.	.	.	.	.	.	.	.
f2p60_3536_18544	-1.01164	3.89407e-17	down	yes	-0.0235527	0.811108	down	no	-0.364703	0.00244894	down	no	-0.135441	0.197268	down	no	-0.186246	0.0748168	down	no	Gene.8463::PuPacbio_f2p60_3536_transcript18544_g1::g.8463::m.8463	129-3335[+]	gi|566177205|ref|XM_002309297.2|	5736	E:0	Populus trichocarpa hypothetical protein (POPTR_0006s20110g) mRNA, complete cds	gi|566177206|ref|XP_002309333.2|	1977	E:0	hypothetical protein POPTR_0006s20110g [Populus trichocarpa]	.	.	.	.	.	.	.	.	PF11145.7	DUF2921	Protein of unknown function (DUF2921)	.	.	.	ExpAA=138.45^PredHel=4^Topology=o788-807i820-842o862-884i905-924o	.	.	.	.
f2p60_332_16897	1.61779	0.00261976	up	yes	0.749808	0.159811	up	no	0.0415782	0.910012	up	no	-0.174808	0.503028	down	no	-0.00348995	0.988657	down	no	.	.	gi|118489084|gb|EF148377.1|	462	E:3e-127	Populus trichocarpa x Populus deltoides clone WS01314_B07 unknown mRNA	.	.	.	.	.	.	.	.	.	.	.	.	.	.	.	.	.	.	.	.	.	.	.
f2p60_1803_23149	5.14319	4.28204e-26	up	yes	3.64432	8.68096e-13	up	yes	2.70464	5.15704e-12	up	yes	0.134779	NA	up	no	#N/A	#N/A	#N/A	#N/A	Gene.11585::PuPacbio_f2p60_1803_transcript23149_g1::g.11585::m.11585	2-463[+]	gi|566151155|ref|XM_006369534.1|	1810	E:0	Populus trichocarpa hypothetical protein (POPTR_0001s26690g) mRNA, partial cds	gi|566151154|ref|XP_006369595.1|	89.4	E:3e-18	hypothetical protein POPTR_0001s266801g, partial [Populus trichocarpa]	.	.	.	.	.	.	.	.	.	.	.	.	.	.	.	.	.	.	.
f2p60_1399_25985	-1.31499	1.14968e-09	down	yes	-0.932706	1.5153e-06	down	no	-0.276228	0.135209	down	no	-0.720516	0.000138653	down	no	-0.501094	0.021017	down	no	Gene.13052::PuPacbio_f2p60_1399_transcript25985_g2::g.13052::m.13052	301-774[+]	gi|566151287|ref|XM_006369567.1|	822	E:0	Populus trichocarpa hypothetical protein (POPTR_0001s27400g) mRNA, complete cds	gi|566151288|ref|XP_006369629.1|	81.3	E:1e-15	hypothetical protein POPTR_0001s27400g [Populus trichocarpa]	.	.	.	.	.	.	.	.	.	.	.	.	.	.	.	.	.	.	.
f2p60_1324_26741	1.15556	2.38404e-12	up	yes	1.36272	1.35599e-19	up	yes	1.02832	3.07212e-10	up	yes	1.28619	6.12783e-10	up	yes	2.16292	3.14923e-43	up	yes	Gene.13407::PuPacbio_f2p60_1324_transcript26741_g4::g.13407::m.13407	290-856[-]	gi|156523313|gb|AC209042.1|	2331	E:0	Populus trichocarpa clone POP052-O09, complete sequence	.	.	.	.	.	.	.	.	.	.	.	.	.	.	.	.	.	.	.	.	.	.	.
f2p60_1282_27089	-1.62757	5.46169e-44	down	yes	-1.5346	6.52734e-36	down	yes	-1.72595	1.09041e-48	down	yes	-0.967912	6.35911e-18	down	no	-0.997793	2.32503e-14	down	no	.	.	gi|118489869|gb|EF148778.1|	1478	E:0	Populus trichocarpa x Populus deltoides clone WS0137_M12 unknown mRNA	gi|118489870|gb|ABK96733.1|	77.8	E:3e-15	unknown [Populus trichocarpa x Populus deltoides]	.	.	.	.	.	.	.	.	.	.	.	.	.	.	.	.	.	.	.
f2p60_1196_279300	0.121612	0.776237	up	no	1.05181	0.0027769	up	yes	0.666943	0.0496188	up	no	0.998025	0.000797345	up	no	1.05115	0.000602055	up	yes	Gene.13948::PuPacbio_f2p60_1196_transcript27930_g10::g.13948::m.13948	3-944[+]	gi|566161159|ref|XM_002304106.2|	2036	E:0	Populus trichocarpa hypothetical protein (POPTR_0003s06260g) mRNA, complete cds	gi|224073720|ref|XP_002304142.1|	604	E:0	hypothetical protein POPTR_0003s06260g [Populus trichocarpa]	.	.	.	.	.	.	.	.	PF13460.5	NAD_binding_10	NAD(P)H-binding	.	.	.	.	.	.	.	.
f2p60_1116_10049	-0.61646	7.63696e-06	down	no	-1.04526	1.851e-15	down	yes	-1.7604	1.85917e-31	down	yes	-1.26829	4.62917e-09	down	yes	-1.0907	4.1776e-05	down	yes	Gene.5895::PuPacbio_f2p60_1116_transcript10049_g1::g.5895::m.5895	3-848[+]	gi|566202710|ref|XM_006375162.1|	1940	E:0	Populus trichocarpa hypothetical protein (POPTR_0014s05430g) mRNA, complete cds	gi|566202711|ref|XP_006375224.1|	558	E:0	hypothetical protein POPTR_0014s05430g [Populus trichocarpa]	.	.	.	.	.	.	.	.	PF00300.21	His_Phos_1	Histidine phosphatase superfamily (branch 1)	.	.	.	.	.	.	.	.
f2p60_1112_10181	-1.02366	6.21087e-17	down	yes	-0.151966	0.134832	down	no	-0.466045	5.06827e-05	down	no	0.0446384	NA	up	no	-0.349183	0.00751061	down	no	.	.	gi|743935747|ref|XM_011013950.1|	1290	E:0	PREDICTED: Populus euphratica uncharacterized LOC105116542 (LOC105116542), mRNA	gi|566196328|ref|XP_002317772.2|	168	E:7e-83	hypothetical protein POPTR_0012s01950g [Populus trichocarpa]	.	.	.	.	.	.	.	.	.	.	.	.	.	.	.	.	.	.	.
f2p60_1110_28760	0.293656	1.27579e-08	up	no	1.62262	3.65181e-282	up	yes	0.96413	1.78928e-45	up	no	0.997784	NA	up	no	1.32241	1.88899e-31	up	yes	Gene.14297::PuPacbio_f2p60_1110_transcript28760_g4::g.14297::m.14297	273-716[+]	gi|743879784|ref|XM_011037737.1|	1770	E:0	PREDICTED: Populus euphratica uncharacterized LOC105133657 (LOC105133657), mRNA	gi|743879785|ref|XP_011036039.1|	254	E:5e-81	PREDICTED: uncharacterized protein LOC105133657 [Populus euphratica]	.	.	.	.	.	.	.	.	.	.	.	.	.	.	.	.	.	.	.
f2p60_1075_29264	-1.03819	0.00874331	down	yes	-0.393412	0.28884	down	no	-0.31226	0.320061	down	no	-1.14873	0.000363528	down	yes	-0.587679	0.0737984	down	no	.	.	gi|164498899|gb|AC216410.1|	1269	E:0	Populus trichocarpa clone POP030-A06, complete sequence	.	.	.	.	.	.	.	.	.	.	.	.	.	.	.	.	.	.	.	.	.	.	.
f2p60_1057_10679	-1.28685	1.62724e-121	down	yes	-0.900199	1.59844e-65	down	no	-0.639405	3.58932e-24	down	no	-0.749216	4.98459e-37	down	no	-0.298862	0.00163042	down	no	.	.	gi|566215485|ref|XM_002324547.2|	1725	E:0	Populus trichocarpa hypothetical protein (POPTR_0018s12410g) mRNA, complete cds	gi|743806450|ref|XP_011017923.1|	259	E:3e-82	PREDICTED: uncharacterized protein LOC105121103 [Populus euphratica]	.	.	.	.	.	.	.	.	.	.	.	.	.	.	.	.	.	.	.
f2p60_1034_10786	-0.656153	0.00799513	down	no	-2.53208	1.36394e-16	down	yes	-1.99579	6.46216e-13	down	yes	-1.39305	3.95241e-07	down	yes	-1.11162	6.84828e-06	down	yes	.	.	gi|743844529|ref|XR_842659.1|	1498	E:0	PREDICTED: Populus euphratica uncharacterized LOC105127574 (LOC105127574), ncRNA	gi|566174298|ref|XP_006380978.1|	70.5	E:1e-12	hypothetical protein POPTR_0006s03630g [Populus trichocarpa]	.	.	.	.	.	.	.	.	.	.	.	.	.	.	.	.	.	.	.
f2p60_1006_30003	4.16802	NA	up	no	3.63959	1.98052e-71	up	yes	3.67925	7.87528e-76	up	yes	1.99521	4.03284e-12	up	yes	0.901172	2.33044e-09	up	no	Gene.14814::PuPacbio_f2p60_1006_transcript30003_g9::g.14814::m.14814	2-631[+]	gi|224107866|ref|XM_002314597.1|	1037	E:0	Populus trichocarpa hypothetical protein (POPTR_0010s08290g) mRNA, complete cds	.	.	.	.	.	.	.	.	PRP2_SOYBN	103	E:2e-25	RecName: Full=Repetitive proline-rich cell wall protein 2;^Eukaryota; Viridiplantae; Streptophyta; Embryophyta; Tracheophyta; Spermatophyta; Magnoliophyta; eudicotyledons; Gunneridae; Pentapetalae; rosids; fabids; Fabales; Fabaceae; Papilionoideae; Phaseoleae; Glycine; Soja	.	.	.	.	.	.	ExpAA=20.42^PredHel=1^Topology=i12-31o	.	GO:0007275|multicellular organism development	GO:0005199|structural constituent of cell wall	GO:0005618|cell wall;GO:0005576|extracellular region
f2p59_1081_10388	1.45669	9.30176e-10	up	yes	0.532648	0.0588319	up	no	1.12956	2.38599e-05	up	yes	0.314487	0.342656	up	no	1.03139	4.58973e-05	up	yes	.	.	gi|162952074|gb|AC215943.1|	760	E:0	Populus trichocarpa clone POP055-B06, complete sequence	gi|566206165|ref|XP_006374344.1|	160	E:1e-42	hypothetical protein POPTR_0015s06260g [Populus trichocarpa]	.	.	.	.	.	.	.	.	.	.	.	.	.	.	.	.	.	.	.
f2p55_905_11913	-1.03793	5.09798e-22	down	yes	-0.229173	0.0128473	down	no	-0.11939	0.198044	down	no	-0.0613933	0.569079	down	no	0.0699836	0.614129	up	no	Gene.6594::PuPacbio_f2p55_905_transcript11913_g1::g.6594::m.6594	88-579[+]	gi|566209217|ref|XM_002323370.2|	1458	E:0	Populus trichocarpa hypothetical protein (POPTR_0016s07560g) mRNA, complete cds	gi|224140063|ref|XP_002323406.1|	338	E:9e-115	hypothetical protein POPTR_0016s07560g [Populus trichocarpa]	.	.	.	.	.	.	.	.	.	.	.	.	.	.	.	.	.	.	.
f2p54_247_39388	4.26569	2.01974e-17	up	yes	4.02936	6.91064e-17	up	yes	2.34203	2.74476e-09	up	yes	0.903217	0.00263014	up	no	0.952733	0.00159378	up	no	.	.	gi|566204331|ref|XM_002320416.2|	353	E:1e-94	Populus trichocarpa pirin-like family protein (POPTR_0014s14780g) mRNA, complete cds	.	.	.	.	.	.	.	.	.	.	.	.	.	.	.	.	.	.	.	.	.	.	.
f2p48_691_33944	-1.078	7.28286e-41	down	yes	0.567883	1.46589e-19	up	no	-0.18302	0.0375774	down	no	-0.297118	NA	down	no	-0.957951	5.30653e-33	down	no	Gene.16242::PuPacbio_f2p48_691_transcript33944_g1::g.16242::m.16242	3-344[-]	gi|566179402|ref|XM_002309836.2|	1140	E:0	Populus trichocarpa hydroxyproline-rich glycoprotein (POPTR_0007s03420g) mRNA, complete cds	gi|224093298|ref|XP_002309872.1|	53.9	E:7e-07	hydroxyproline-rich glycoprotein [Populus trichocarpa]	.	.	.	.	.	.	.	.	.	.	.	.	.	.	.	.	.	.	.
f2p47_843_12525	-1.36834	1.06272e-07	down	yes	-0.649758	0.00293573	down	no	0.308846	0.133032	up	no	0.516876	0.00454307	up	no	0.900421	5.12157e-05	up	no	Gene.6787::PuPacbio_f2p47_843_transcript12525_g1::g.6787::m.6787	113-694[+]	gi|566204721|ref|XM_002321183.2|	1308	E:0	Populus trichocarpa hypothetical protein (POPTR_0014s17100g) mRNA, complete cds	gi|224131954|ref|XP_002321219.1|	315	E:1e-105	hypothetical protein POPTR_0014s17100g [Populus trichocarpa]	.	.	.	.	.	.	.	.	PF11210.7	DUF2996	Protein of unknown function (DUF2996)	.	.	.	.	.	.	.	.
f2p47_705_33798	-0.336132	0.41402	down	no	1.12152	0.000323717	up	yes	0.704366	0.0268727	up	no	0.243322	0.410681	up	no	-0.197559	0.535944	down	no	.	.	gi|146149427|gb|AC184070.2|	743	E:0	Populus trichocarpa clone Pop1-31N15, complete sequence	gi|566166719|ref|XP_006384488.1|	83.2	E:9e-18	hypothetical protein POPTR_0004s15530g [Populus trichocarpa]	.	.	.	.	.	.	.	.	.	.	.	.	.	.	.	.	.	.	.
f2p44_438_37200	3.56975	7.60944e-29	up	yes	4.31117	5.98946e-51	up	yes	4.369	1.80355e-65	up	yes	3.85966	2.36954e-43	up	yes	1.94469	6.24261e-11	up	yes	.	.	gi|566203580|ref|XM_002320878.2|	689	E:0	Populus trichocarpa hypothetical protein (POPTR_0014s10440g) mRNA, complete cds	gi|224130734|ref|XP_002320914.1|	101	E:2e-25	hypothetical protein POPTR_0014s10440g [Populus trichocarpa]	.	.	.	.	.	.	.	.	.	.	.	.	.	.	.	.	.	.	.
f2p43_473_36780	1.59667	5.84804e-25	up	yes	1.84358	1.22806e-46	up	yes	1.59939	1.55688e-22	up	yes	0.980515	7.14147e-10	up	no	0.905934	1.15568e-07	up	no	.	.	gi|566227502|ref|XM_002325729.2|	645	E:0	Populus trichocarpa hypothetical protein (POPTR_0019s03400g) mRNA, complete cds	gi|566227270|ref|XP_006371084.1|	53.9	E:1e-07	hypothetical protein POPTR_0019s03370g [Populus trichocarpa]	.	.	.	.	.	.	.	.	.	.	.	.	.	.	.	.	.	.	.
f2p42_560_15343	2.19678	6.69059e-07	up	yes	2.76617	2.05374e-12	up	yes	2.30441	3.4632e-11	up	yes	0.925226	0.00585958	up	no	0.487766	0.13943	up	no	.	.	gi|566189928|ref|XM_002314632.2|	514	E:1e-142	Populus trichocarpa hypothetical protein (POPTR_0010s09290g) mRNA, complete cds	gi|224107959|ref|XP_002314668.1|	78.6	E:2e-16	hypothetical protein POPTR_0010s09290g [Populus trichocarpa]	.	.	.	.	.	.	.	.	.	.	.	.	.	.	.	.	.	.	.
f2p41_847_31755	-1.55269	2.48337e-05	down	yes	-0.684576	0.0277457	down	no	-0.669243	0.0243767	down	no	-0.842948	0.00856538	down	no	-0.498287	0.0739645	down	no	Gene.15525::PuPacbio_f2p41_847_transcript31755_g1::g.15525::m.15525	2-544[+]	gi|566174041|ref|XM_006380866.1|	1090	E:0	Populus trichocarpa hypothetical protein (POPTR_0006s02090g) mRNA, complete cds	gi|566174042|ref|XP_006380928.1|	229	E:3e-72	hypothetical protein POPTR_0006s02090g [Populus trichocarpa]	.	.	.	.	.	.	.	.	PF00403.25	HMA	Heavy-metal-associated domain	.	.	.	.	.	GO:0030001|metal ion transport	GO:0046872|metal ion binding	.
f2p40_472_16063	-1.09518	0.0314507	down	no	-1.1186	0.0225959	down	yes	0.334018	0.352705	up	no	0.0481528	0.88255	up	no	0.327454	0.298842	up	no	.	.	gi|743836538|ref|XM_011026983.1|	736	E:0	PREDICTED: Populus euphratica uncharacterized protein C24B11.05 (LOC105126196), mRNA	gi|743836539|ref|XP_011025285.1|	128	E:2e-33	PREDICTED: uncharacterized protein C24B11.05 [Populus euphratica]	.	.	.	.	.	.	.	.	.	.	.	.	.	.	.	.	.	.	.
f2p38_1134_9839	-0.325743	0.0474102	down	no	0.0713524	0.624454	up	no	0.485796	0.000418608	up	no	0.962093	1.43769e-13	up	no	1.02647	6.3423e-14	up	yes	Gene.5799::PuPacbio_f2p38_1134_transcript9839_g1::g.5799::m.5799	86-436[+]	gi|566148773|ref|XM_006368805.1|	1932	E:0	Populus trichocarpa hypothetical protein (POPTR_0001s13550g) mRNA, complete cds	gi|566148774|ref|XP_006368867.1|	331	E:2e-127	hypothetical protein POPTR_0001s13550g [Populus trichocarpa]	.	.	.	.	.	.	.	.	.	.	.	.	.	.	ExpAA=25.35^PredHel=1^Topology=i54-76o	.	.	.	.
f2p34_958_30518	0.665685	4.51874e-19	up	no	1.05418	8.75566e-46	up	yes	1.18573	7.19464e-49	up	yes	1.13502	5.91515e-44	up	yes	0.207294	0.0391402	up	no	Gene.15023::PuPacbio_f2p34_958_transcript30518_g1::g.15023::m.15023	2-676[+]	gi|743866293|ref|XM_011034119.1|	1411	E:0	PREDICTED: Populus euphratica neurogenic locus notch homolog protein 2-like (LOC105131247), mRNA	gi|743866294|ref|XP_011032421.1|	322	E:3e-107	PREDICTED: neurogenic locus notch homolog protein 2-like [Populus euphratica]	.	.	.	.	.	.	.	.	.	.	.	.	.	.	ExpAA=31.18^PredHel=1^Topology=i13-35o	.	.	.	.
f2p34_635_34718	2.04271	1.55849e-08	up	yes	2.1399	9.78204e-11	up	yes	0.526559	0.148394	up	no	-0.267881	0.424999	down	no	-1.26776	5.89367e-05	down	yes	.	.	gi|566252712|ref|XM_006387010.1|	728	E:0	Populus trichocarpa hypothetical protein (POPTR_1962s00200g) mRNA, complete cds	gi|566252713|ref|XP_006387072.1|	146	E:5e-42	hypothetical protein POPTR_1962s00200g [Populus trichocarpa]	.	.	.	.	.	.	.	.	.	.	.	.	.	.	.	.	.	.	.
f2p33_530_36162	0.936355	0.0548467	up	no	1.68699	3.52987e-05	up	yes	-0.362836	0.354287	down	no	0.0446904	0.876954	up	no	-0.625879	0.0439239	down	no	.	.	gi|566171740|ref|XM_002307366.2|	769	E:0	Populus trichocarpa hypothetical protein (POPTR_0005s16430g) mRNA, complete cds	gi|224084764|ref|XP_002307402.1|	159	E:2e-47	hypothetical protein POPTR_0005s16430g [Populus trichocarpa]	.	.	.	.	.	.	.	.	.	.	.	.	.	.	.	.	.	.	.
f2p22_1088_29111	0.195019	0.0165908	up	no	-1.00868	1.36981e-28	down	yes	-0.949201	4.40991e-21	down	no	-0.794743	9.19002e-15	down	no	-0.464291	1.09556e-05	down	no	Gene.14456::PuPacbio_f2p22_1088_transcript29111_g1::g.14456::m.14456	130-837[+]	gi|566178773|ref|XM_006382135.1|	1753	E:0	Populus trichocarpa hypothetical protein (POPTR_0006s29270g) mRNA, complete cds	gi|566178774|ref|XP_006382197.1|	471	E:5e-165	hypothetical protein POPTR_0006s29270g [Populus trichocarpa]	.	.	.	.	.	.	.	.	PF04654.11	DUF599	Protein of unknown function, DUF599	.	.	.	ExpAA=90.75^PredHel=4^Topology=o10-28i72-94o117-139i188-210o	.	.	.	.
f2p22_1066_29341	1.17222	6.26036e-20	up	yes	1.45065	4.09152e-36	up	yes	1.11754	6.14968e-18	up	yes	0.155993	NA	up	no	0.876629	0.000885938	up	no	Gene.14552::PuPacbio_f2p22_1066_transcript29341_g1::g.14552::m.14552	119-733[+]	gi|566204793|ref|XM_006375542.1|	1718	E:0	Populus trichocarpa hypothetical protein (POPTR_0014s17460g) mRNA, complete cds	gi|566204794|ref|XP_006375604.1|	389	E:2e-133	hypothetical protein POPTR_0014s17460g [Populus trichocarpa]	.	.	.	.	.	.	.	.	.	.	.	.	.	.	.	.	.	.	.
f2p20_1519_7034	0.321666	0.0967366	up	no	0.261754	0.166283	up	no	0.605659	0.00276655	up	no	0.853294	3.09407e-06	up	no	1.04016	1.42569e-09	up	yes	Gene.4590::PuPacbio_f2p20_1519_transcript7034_g1::g.4590::m.4590	605-1312[+]	gi|566153309|ref|XM_002300342.2|	2519	E:0	Populus trichocarpa hypothetical protein (POPTR_0001s37580g) mRNA, complete cds	gi|224061224|ref|XP_002300378.1|	373	E:3e-124	hypothetical protein POPTR_0001s37580g [Populus trichocarpa]	.	.	.	.	.	.	.	.	.	.	.	.	.	.	ExpAA=39.89^PredHel=2^Topology=i13-32o37-59i	.	.	.	.
f2p16_628_34852	-1.51663	3.6728e-19	down	yes	-1.62721	2.37097e-22	down	yes	-0.909031	7.54445e-10	down	no	-1.27954	2.45961e-14	down	yes	-0.694512	3.30309e-05	down	no	Gene.16445::PuPacbio_f2p16_628_transcript34852_g1::g.16445::m.16445	2-343[+]	gi|566200846|ref|XM_006376277.1|	955	E:0	Populus trichocarpa hypothetical protein (POPTR_0013s12160g) mRNA, complete cds	gi|566200847|ref|XP_006376339.1|	119	E:3e-31	hypothetical protein POPTR_0013s12160g [Populus trichocarpa]	.	.	.	.	.	.	.	.	.	.	.	.	.	.	.	.	.	.	.
f2p15_485_15912	0.990001	4.91593e-20	up	no	1.30941	5.83343e-47	up	yes	1.35671	1.92827e-39	up	yes	0.705351	2.6523e-11	up	no	0.717431	3.25777e-09	up	no	.	.	gi|566227502|ref|XM_002325729.2|	800	E:0	Populus trichocarpa hypothetical protein (POPTR_0019s03400g) mRNA, complete cds	gi|224145786|ref|XP_002325765.1|	50.1	E:5e-06	hypothetical protein POPTR_0019s03400g [Populus trichocarpa]	.	.	.	.	.	.	.	.	.	.	.	.	.	.	.	.	.	.	.
f22p60_640_35824	0.670123	0.00538958	up	no	1.4818	4.1772e-12	up	yes	0.737455	0.00175131	up	no	0.657551	0.00257469	up	no	0.527285	0.019946	up	no	.	.	gi|566213287|ref|XM_006373410.1|	723	E:0	Populus trichocarpa hypothetical protein (POPTR_0017s14090g) mRNA, complete cds	gi|566213288|ref|XP_006373472.1|	127	E:1e-34	hypothetical protein POPTR_0017s14090g [Populus trichocarpa]	.	.	.	.	.	.	.	.	.	.	.	.	.	.	.	.	.	.	.
f13p60_260_39684	-1.15525	0.00360469	down	yes	0.0693969	0.819778	up	no	-0.320292	0.311806	down	no	-0.673741	0.0207196	down	no	-0.722892	0.0139229	down	no	.	.	gi|566176272|ref|XM_006381502.1|	375	E:3e-101	Populus trichocarpa sucrose synthase family protein (POPTR_0006s13900g) mRNA, complete cds	.	.	.	.	.	.	.	.	.	.	.	.	.	.	.	.	.	.	.	.	.	.	.
f10p60_869_31577	0.463386	0.243268	up	no	1.22508	0.000175456	up	yes	2.04248	2.58607e-14	up	yes	1.18756	8.64441e-05	up	yes	1.27125	2.24259e-05	up	yes	Gene.15443::PuPacbio_f10p60_869_transcript31577_g1::g.15443::m.15443	69-557[+]	gi|118486250|gb|EF146927.1|	1539	E:0	Populus trichocarpa clone WS01225_A20 unknown mRNA	gi|224124994|ref|XP_002319476.1|	299	E:1e-99	hypothetical protein POPTR_0013s00850g [Populus trichocarpa]	.	.	.	.	.	.	.	.	PF04398.11	DUF538	Protein of unknown function, DUF538	.	.	.	.	.	.	.	.
f6p60_400_37740	-0.144939	0.556931	down	no	-0.50134	0.0342449	down	no	-1.01332	4.46616e-05	down	yes	-0.581186	0.0146242	down	no	-0.74339	0.00207291	down	no	.	.	gi|566153291|ref|XM_002300338.2|	518	E:7e-144	Populus trichocarpa Zinc transporter 11 precursor family protein (POPTR_0001s37480g) mRNA, complete cds	.	.	.	.	.	.	.	.	.	.	.	.	.	.	.	.	.	.	.	.	.	.	.
f2p60_834_12773	1.19371	1.06887e-13	up	yes	0.450542	0.00561237	up	no	0.315061	0.0578113	up	no	-0.0173341	0.922181	down	no	0.157795	0.356762	up	no	Gene.6861::PuPacbio_f2p60_834_transcript12773_g3::g.6861::m.6861	1-495[+]	gi|743918720|ref|XM_011005067.1|	1321	E:0	PREDICTED: Populus euphratica UBP1-associated proteins 1C (LOC105110130), mRNA	gi|224087965|ref|XP_002308274.1|	289	E:1e-93	hypothetical protein POPTR_0006s14820g [Populus trichocarpa]	.	.	.	.	.	.	.	.	.	.	.	.	.	.	.	.	.	.	.
f2p60_1530_6943	-1.06643	3.29781e-70	down	yes	-0.84042	3.83094e-48	down	no	-0.524264	1.047e-17	down	no	-0.334325	0.00207147	down	no	-0.310346	4.85773e-06	down	no	Gene.4559::PuPacbio_f2p60_1530_transcript6943_g2::g.4559::m.4559	149-1291[+]	gi|566150975|ref|XM_002299783.2|	2599	E:0	Populus trichocarpa hypothetical protein (POPTR_0001s25700g) mRNA, complete cds	gi|566150976|ref|XP_002299819.2|	770	E:0	hypothetical protein POPTR_0001s25700g [Populus trichocarpa]	.	.	.	.	.	.	.	.	PF00096.25	zf-C2H2	Zinc finger, C2H2 type	.	.	.	ExpAA=20.26^PredHel=1^Topology=i7-29o	.	.	.	.
f2p21_567_35709	-0.656364	0.000164177	down	no	-1.66125	8.76135e-19	down	yes	-1.2464	4.70278e-12	down	yes	-0.649037	0.000458876	down	no	-0.769521	0.000197209	down	no	.	.	gi|743920018|ref|XR_839510.1|	431	E:1e-117	PREDICTED: Populus euphratica uncharacterized LOC105110648 (LOC105110648), ncRNA	.	.	.	.	.	.	.	.	.	.	.	.	.	.	.	.	.	.	.	.	.	.	.
f2p60_564_35731	-0.192412	0.589769	down	no	-1.07976	0.00562771	down	yes	-0.484922	0.13372	down	no	-0.854877	0.00722953	down	no	-0.659457	0.0366442	down	no	Gene.16563::PuPacbio_f2p60_564_transcript35731_g8::g.16563::m.16563	2-373[+]	gi|566244362|ref|XM_006371575.1|	843	E:0	Populus trichocarpa hypothetical protein (POPTR_0019s13970g) mRNA, complete cds	gi|566244363|ref|XP_006371637.1|	184	E:4e-57	hypothetical protein POPTR_0019s13970g [Populus trichocarpa]	.	.	.	.	.	.	.	.	PF12609.7	DUF3774	Wound-induced protein	.	.	.	.	.	.	.	.
f3p60_490_36536	1.03353	0.00235147	up	yes	0.471757	0.192791	up	no	-0.0365513	0.917344	down	no	-1.11492	0.000825191	down	yes	-0.926097	0.0053521	down	no	.	.	gi|566151948|ref|XM_006369693.1|	560	E:2e-156	Populus trichocarpa hypothetical protein (POPTR_0001s31040g) mRNA, complete cds	gi|566151949|ref|XP_006369755.1|	72	E:2e-12	hypothetical protein POPTR_0001s31040g [Populus trichocarpa]	.	.	.	.	.	.	.	.	.	.	.	.	.	.	.	.	.	.	.
f2p60_425_37336	1.19316	0.011614	up	yes	0.323317	0.519783	up	no	-0.258645	0.510852	down	no	-0.233238	0.47466	down	no	-0.451451	0.150639	down	no	.	.	gi|566210102|ref|XM_002323585.2|	444	E:1e-121	Populus trichocarpa hypothetical protein (POPTR_0016s13440g) mRNA, complete cds	.	.	.	.	.	.	.	.	.	.	.	.	.	.	.	.	.	.	.	.	.	.	.
f2p38_1769_23366	-0.735517	3.29116e-25	down	no	-1.14602	9.13283e-64	down	yes	-0.538374	1.15678e-12	down	no	-0.413154	1.33932e-09	down	no	-0.240372	0.00418107	down	no	Gene.11704::PuPacbio_f2p38_1769_transcript23366_g1::g.11704::m.11704	320-1318[+]	gi|743901312|ref|XM_011045672.1|	2883	E:0	PREDICTED: Populus euphratica uncharacterized LOC105139289 (LOC105139289), transcript variant X1, mRNA	gi|743901313|ref|XP_011043974.1|	634	E:0	PREDICTED: uncharacterized protein LOC105139289 isoform X1 [Populus euphratica]	.	.	.	.	.	.	.	.	PF09177.10	Syntaxin-6_N	Syntaxin 6, N-terminal	.	.	.	ExpAA=20.94^PredHel=1^Topology=o309-331i	.	GO:0048193|Golgi vesicle transport	.	GO:0016020|membrane
f2p60_536_362051	-0.0847771	0.856254	down	no	2.29805	1.99637e-13	up	yes	0.0468374	0.900264	up	no	0.0808865	0.806507	up	no	0.481766	0.131632	up	no	.	.	gi|566165506|ref|XM_002305204.2|	902	E:0	Populus trichocarpa hypothetical protein (POPTR_0004s07940g) mRNA, complete cds	gi|313770767|gb|ADR82000.1|	78.2	E:6e-18	sucrose synthase 5 [Populus trichocarpa]	.	.	.	.	.	.	.	.	.	.	.	.	.	.	.	.	.	.	.
f3p47_1034_10758	1.06522	2.57451e-26	up	yes	0.995632	1.53169e-28	up	no	0.40127	0.000482419	up	no	0.661043	1.08447e-08	up	no	0.356731	0.00348081	up	no	Gene.6179::PuPacbio_f3p47_1034_transcript10758_g1::g.6179::m.6179	3-629[+]	gi|566160446|ref|XM_006385212.1|	1807	E:0	Populus trichocarpa hypothetical protein (POPTR_0003s02350g) mRNA, complete cds	gi|566160447|ref|XP_006385274.1|	402	E:8e-139	hypothetical protein POPTR_0003s02350g [Populus trichocarpa]	.	.	.	.	.	.	.	.	PF07647.16	SAM_2	SAM domain (Sterile alpha motif)	.	.	.	.	.	.	GO:0005515|protein binding	.
f2p60_370_37929	0.997672	0.0428345	up	no	1.63749	0.000143717	up	yes	1.083	0.00443924	up	yes	1.05811	NA	up	no	0.616418	0.0638428	up	no	.	.	gi|566240290|ref|XM_002325940.2|	597	E:9e-168	Populus trichocarpa hypothetical protein (POPTR_0019s10980g) mRNA, complete cds	gi|224146353|ref|XP_002325976.1|	110	E:4e-29	hypothetical protein POPTR_0019s10980g [Populus trichocarpa]	.	.	.	.	.	.	.	.	.	.	.	.	.	.	.	.	.	.	.
f2p60_348_16887	1.03687	0.00010507	up	yes	0.617404	0.0171739	up	no	-0.00991934	0.976045	down	no	-0.151955	0.572392	down	no	0.0511032	0.842654	up	no	.	.	gi|566156425|ref|XM_002302093.2|	501	E:6e-139	Populus trichocarpa 40S ribosomal protein S12-1 (POPTR_0002s05710g) mRNA, complete cds	.	.	.	.	.	.	.	.	.	.	.	.	.	.	.	.	.	.	.	.	.	.	.
f2p60_648_34651	-1.59518	2.42656e-46	down	yes	-1.05809	2.59035e-23	down	yes	-0.410991	6.94029e-06	down	no	-0.175793	NA	down	no	0.101922	0.409833	up	no	Gene.16411::PuPacbio_f2p60_648_transcript34651_g9::g.16411::m.16411	92-409[+]	gi|160956377|emb|CU226045.1|	654	E:0	Populus EST from leave	gi|224141529|ref|XP_002324122.1|	134	E:7e-36	hypothetical protein POPTR_0017s13120g [Populus trichocarpa]	.	.	.	.	.	.	.	.	.	.	.	.	.	.	.	.	.	.	.
f2p36_984_30202	-1.28907	2.10093e-08	down	yes	0.468451	0.00173105	up	no	0.121487	0.486877	up	no	0.227367	0.166957	up	no	0.63034	7.19363e-06	up	no	Gene.14896::PuPacbio_f2p36_984_transcript30202_g1::g.14896::m.14896	147-665[+]	gi|566176042|ref|XM_006381390.1|	1243	E:0	Populus trichocarpa hypothetical protein (POPTR_0006s12970g) mRNA, complete cds	gi|566176043|ref|XP_006381452.1|	310	E:4e-103	hypothetical protein POPTR_0006s12970g [Populus trichocarpa]	.	.	.	.	.	.	.	.	PF04520.12	Senescence_reg	Senescence regulator	.	.	.	.	.	.	.	.
f2p25_1838_5060	-1.42412	3.0951e-46	down	yes	-0.89267	7.5903e-26	down	no	-0.449548	1.48008e-07	down	no	-0.148914	0.0803306	down	no	-0.207146	0.0107677	down	no	Gene.3586::PuPacbio_f2p25_1838_transcript5060_g1::g.3586::m.3586	189-1334[+]	gi|566234858|ref|XM_002325431.2|	3219	E:0	Populus trichocarpa hypothetical protein (POPTR_0019s08010g) mRNA, complete cds	gi|566234859|ref|XP_002325467.2|	797	E:0	hypothetical protein POPTR_0019s08010g [Populus trichocarpa]	.	.	.	.	.	.	.	.	PF05212.11	DUF707	Protein of unknown function (DUF707)	.	.	.	ExpAA=22.72^PredHel=1^Topology=i21-43o	.	.	.	.
f2p60_1648_6150	0.955686	1.55148e-13	up	no	1.06196	6.77181e-19	up	yes	0.736902	2.10951e-08	up	no	0.617029	8.66761e-05	up	no	0.442707	0.00309369	up	no	Gene.4125::PuPacbio_f2p60_1648_transcript6150_g1::g.4125::m.4125	269-1558[+]	gi|566191804|ref|XM_002315150.2|	2902	E:0	Populus trichocarpa hypothetical protein (POPTR_0010s20240g) mRNA, complete cds	gi|566191805|ref|XP_002315186.2|	858	E:0	hypothetical protein POPTR_0010s20240g [Populus trichocarpa]	.	.	.	.	.	.	.	.	PF04788.11	DUF620	Protein of unknown function (DUF620)	.	.	.	.	.	.	.	.
f2p60_2532_20292	-1.30788	1.68727e-69	down	yes	-0.688296	1.47475e-28	down	no	-0.84059	7.02164e-34	down	no	-0.776143	8.47707e-22	down	no	-0.876055	8.25576e-37	down	no	Gene.9681::PuPacbio_f2p60_2532_transcript20292_g3::g.9681::m.9681	124-2313[+]	gi|566146904|ref|XM_006368394.1|	4451	E:0	Populus trichocarpa hypothetical protein (POPTR_0001s02970g) mRNA, complete cds	gi|566146905|ref|XP_006368456.1|	1379	E:0	hypothetical protein POPTR_0001s02970g [Populus trichocarpa]	.	.	.	.	.	.	.	.	PF13968.5	DUF4220	Domain of unknown function (DUF4220)	.	.	.	ExpAA=173.32^PredHel=8^Topology=o15-37i49-71o86-108i115-137o142-164i299-321o336-358i571-593o	.	.	.	.
f4p60_1996_22085	-1.37785	1.22e-92	down	yes	-1.1902	2.77279e-68	down	yes	-0.641191	1.36613e-17	down	no	-0.290163	0.0246444	down	no	-0.303434	0.00114173	down	no	Gene.10916::PuPacbio_f4p60_1996_transcript22085_g2::g.10916::m.10916	585-1751[+]	gi|743786311|ref|XM_011029084.1|	3312	E:0	PREDICTED: Populus euphratica uncharacterized LOC105127700 (LOC105127700), mRNA	gi|224099865|ref|XP_002311650.1|	725	E:0	hypothetical protein POPTR_0008s15960g [Populus trichocarpa]	.	.	.	.	.	.	.	.	PF04720.11	PDDEXK_6	PDDEXK-like family of unknown function	.	.	.	.	.	.	.	.
f2p60_630_34757	-1.78125	6.37514e-13	down	yes	-1.42026	1.29133e-10	down	yes	-0.910522	4.12479e-05	down	no	-0.239703	0.225733	down	no	-0.381718	0.0733088	down	no	Gene.16431::PuPacbio_f2p60_630_transcript34757_g4::g.16431::m.16431	3-314[+]	gi|743786311|ref|XM_011029084.1|	798	E:0	PREDICTED: Populus euphratica uncharacterized LOC105127700 (LOC105127700), mRNA	gi|224099865|ref|XP_002311650.1|	183	E:8e-53	hypothetical protein POPTR_0008s15960g [Populus trichocarpa]	.	.	.	.	.	.	.	.	.	.	.	.	.	.	.	.	.	.	.
f3p60_1192_27966	0.142934	0.561116	up	no	1.56192	6.86466e-18	up	yes	1.26653	7.74558e-11	up	yes	1.13945	1.67895e-08	up	yes	1.4075	2.9211e-13	up	yes	Gene.13961::PuPacbio_f3p60_1192_transcript27966_g4::g.13961::m.13961	2-970[+]	gi|566164889|ref|XM_002305758.2|	1980	E:0	Populus trichocarpa hypothetical protein (POPTR_0004s04420g) mRNA, complete cds	gi|566164890|ref|XP_002305794.2|	551	E:0	hypothetical protein POPTR_0004s04420g [Populus trichocarpa]	.	.	.	.	.	.	.	.	PF04720.11	PDDEXK_6	PDDEXK-like family of unknown function	.	.	.	.	.	.	.	.
f2p35_1206_9270	-1.52641	2.74315e-16	down	yes	0.193471	0.157035	up	no	0.957611	1.29392e-12	up	no	-0.00789477	0.96028	down	no	0.0181151	0.908692	up	no	Gene.5557::PuPacbio_f2p35_1206_transcript9270_g1::g.5557::m.5557	66-989[+]	gi|566193847|ref|XM_006377307.1|	2093	E:0	Populus trichocarpa hypothetical protein (POPTR_0011s05310g) mRNA, complete cds	gi|566193848|ref|XP_006377369.1|	503	E:6e-176	hypothetical protein POPTR_0011s05310g [Populus trichocarpa]	.	.	.	.	.	.	.	.	PF04720.11	PDDEXK_6	PDDEXK-like family of unknown function	.	.	.	.	.	.	.	.
f3p27_1014_10914	-1.59668	7.52522e-11	down	yes	-0.855677	3.56386e-05	down	no	0.4854	0.00496416	up	no	-0.268203	0.12634	down	no	0.168193	0.354298	up	no	Gene.6232::PuPacbio_f3p27_1014_transcript10914_g1::g.6232::m.6232	59-832[+]	gi|566169746|ref|XM_006382778.1|	1685	E:0	Populus trichocarpa hypothetical protein (POPTR_0005s05950g) mRNA, complete cds	gi|566169747|ref|XP_006382840.1|	501	E:5e-177	hypothetical protein POPTR_0005s05950g [Populus trichocarpa]	.	.	.	.	.	.	.	.	PF04720.11	PDDEXK_6	PDDEXK-like family of unknown function	.	.	.	.	.	.	.	.
f2p60_3124_1458	-1.82626	2.19488e-19	down	yes	0.180756	0.20922	up	no	-1.62484	3.08476e-17	down	yes	-1.42274	3.56659e-12	down	yes	-1.08153	4.17251e-07	down	yes	Gene.1334::PuPacbio_f2p60_3124_transcript1458_g1::g.1334::m.1334	89-2875[+]	gi|566161608|ref|XM_006385545.1|	5060	E:0	Populus trichocarpa hypothetical protein (POPTR_0003s08570g) mRNA, complete cds	gi|566161609|ref|XP_006385607.1|	1731	E:0	hypothetical protein POPTR_0003s08570g [Populus trichocarpa]	.	.	.	.	.	.	.	.	PF11145.7	DUF2921	Protein of unknown function (DUF2921)	.	.	.	ExpAA=137.11^PredHel=5^Topology=o641-663i670-692o720-742i761-780o877-899i	.	.	.	.
f4p60_1185_28012	0.355575	0.00789367	up	no	1.30958	1.44249e-34	up	yes	1.23448	3.00163e-24	up	yes	1.10857	7.76322e-21	up	yes	0.932122	4.31346e-13	up	no	Gene.13978::PuPacbio_f4p60_1185_transcript28012_g3::g.13978::m.13978	58-672[+]	gi|566211711|ref|XM_006372846.1|	1851	E:0	Populus trichocarpa hypothetical protein (POPTR_0017s06130g) mRNA, complete cds	gi|566211702|ref|XP_006372903.1|	301	E:4e-98	hypothetical protein POPTR_0017s06130g [Populus trichocarpa]	.	.	.	.	.	.	.	.	PF07939.10	DUF1685	Protein of unknown function (DUF1685)	.	.	.	.	.	.	.	.
f2p25_1083_29243	0.977694	2.86602e-12	up	no	1.16722	2.66874e-18	up	yes	0.47973	0.00158473	up	no	0.81124	0.00395389	up	no	0.559503	0.000184189	up	no	Gene.14502::PuPacbio_f2p25_1083_transcript29243_g1::g.14502::m.14502	348-743[+]	gi|566177783|ref|XM_002308478.2|	1738	E:0	Populus trichocarpa hypothetical protein (POPTR_0006s23570g) mRNA, complete cds	gi|224088689|ref|XP_002308514.1|	249	E:3e-79	hypothetical protein POPTR_0006s23570g [Populus trichocarpa]	.	.	.	.	.	.	.	.	PF07911.12	DUF1677	Protein of unknown function (DUF1677)	.	.	.	.	.	.	.	.
f3p60_928_11978	0.820326	7.92816e-16	up	no	0.89755	4.79324e-19	up	no	0.935501	1.69193e-19	up	no	0.948038	6.34115e-14	up	no	1.16574	1.10368e-32	up	yes	Gene.6626::PuPacbio_f3p60_928_transcript11978_g1::g.6626::m.6626	1-648[+]	gi|566188306|ref|XM_002313562.2|	1454	E:0	Populus trichocarpa hypothetical protein (POPTR_0009s16340g) mRNA, complete cds	gi|224104867|ref|XP_002313598.1|	270	E:3e-87	hypothetical protein POPTR_0009s16340g [Populus trichocarpa]	.	.	.	.	F210B_MOUSE	65.9	E:3e-12	RecName: Full=Protein FAM210B;^Eukaryota; Metazoa; Chordata; Craniata; Vertebrata; Euteleostomi; Mammalia; Eutheria; Euarchontoglires; Glires; Rodentia; Myomorpha; Muroidea; Muridae; Murinae; Mus; Mus	PF06916.12	DUF1279	Protein of unknown function (DUF1279)	ENOG411243X	family with sequence similarity 210, member B	.	ExpAA=29.41^PredHel=1^Topology=i130-152o	.	.	.	GO:0016021|integral component of membrane
f2p60_1026_29996	-1.07199	1.18115e-38	down	yes	-0.3728	3.19571e-07	down	no	-0.142993	0.121488	down	no	0.190383	0.0109762	up	no	0.537261	6.24625e-07	up	no	Gene.14810::PuPacbio_f2p60_1026_transcript29996_g8::g.14810::m.14810	3-659[+]	gi|566183590|ref|XM_002311435.2|	1705	E:0	Populus trichocarpa hypothetical protein (POPTR_0008s12320g) mRNA, complete cds	gi|566183591|ref|XP_002311471.2|	399	E:6e-137	hypothetical protein POPTR_0008s12320g [Populus trichocarpa]	.	.	.	.	.	.	.	.	PF06749.11	DUF1218	Protein of unknown function (DUF1218)	.	.	.	ExpAA=90.48^PredHel=4^Topology=i21-43o70-92i113-135o160-182i	.	.	.	.
f19p60_551_35977	-2.70247	2.77236e-68	down	yes	-2.63937	2.63843e-65	down	yes	-1.68138	4.64578e-38	down	yes	-1.40183	1.74324e-19	down	yes	-0.506078	0.0152389	down	no	.	.	gi|158631299|gb|AC213150.1|	893	E:0	Populus trichocarpa clone POP009-N05, complete sequence	gi|566210728|ref|XP_006372442.1|	122	E:5e-33	hypothetical protein POPTR_0017s01670g [Populus trichocarpa]	.	.	.	.	.	.	.	.	.	.	.	.	.	.	.	.	.	.	.
f10p60_812_32494	-1.39656	1.33061e-43	down	yes	-0.841513	2.50485e-25	down	no	-1.01365	2.19772e-34	down	yes	-0.4964	1.9342e-11	down	no	-0.369633	3.14299e-05	down	no	Gene.15805::PuPacbio_f10p60_812_transcript32494_g1::g.15805::m.15805	59-649[+]	gi|566211595|ref|XM_006372788.1|	1382	E:0	Populus trichocarpa hypothetical protein (POPTR_0017s05660g) mRNA, complete cds	gi|566211596|ref|XP_006372850.1|	280	E:7e-92	hypothetical protein POPTR_0017s05660g [Populus trichocarpa]	.	.	.	.	.	.	.	.	PF03208.18	PRA1	PRA1 family protein	.	.	.	ExpAA=80.83^PredHel=4^Topology=i64-81o86-108i121-138o142-164i	.	.	.	.
f2p60_1524_6917	-1.01312	2.75232e-24	down	yes	-0.225087	0.0082453	down	no	-0.219506	0.0491855	down	no	-0.147416	0.433309	down	no	-0.0736551	0.698938	down	no	Gene.4543::PuPacbio_f2p60_1524_transcript6917_g2::g.4543::m.4543	73-1302[+]	gi|566213157|ref|XM_006373345.1|	2660	E:0	Populus trichocarpa hypothetical protein (POPTR_0017s13490g) mRNA, complete cds	gi|566213158|ref|XP_006373407.1|	368	E:1e-119	hypothetical protein POPTR_0017s13490g [Populus trichocarpa]	.	.	.	.	.	.	.	.	PF01190.16	Pollen_Ole_e_I	Pollen proteins Ole e I like	.	.	.	.	.	.	.	.
f2p60_2047_21840	1.10784	6.20045e-64	up	yes	0.875701	8.96047e-45	up	no	1.05004	1.65087e-50	up	yes	1.02194	NA	up	no	0.526766	2.30229e-06	up	no	Gene.10770::PuPacbio_f2p60_2047_transcript21840_g4::g.10770::m.10770	124-1764[+]	gi|566215007|ref|XM_002324989.2|	3618	E:0	Populus trichocarpa hypothetical protein (POPTR_0018s09440g) mRNA, complete cds	gi|224143636|ref|XP_002325025.1|	1097	E:0	hypothetical protein POPTR_0018s09440g [Populus trichocarpa]	.	.	.	.	.	.	.	.	PF06101.10	Vps62	Vacuolar protein sorting-associated protein 62	.	.	.	.	.	.	.	.
f5p60_732_13875	-1.20165	1.4972e-47	down	yes	-0.175356	0.00686344	down	no	-0.082742	0.40262	down	no	0.32549	0.00165371	up	no	0.486995	2.51923e-09	up	no	Gene.7196::PuPacbio_f5p60_732_transcript13875_g3::g.7196::m.7196	192-557[+]	gi|566176442|ref|XM_006381585.1|	1171	E:0	Populus trichocarpa membrane family protein (POPTR_0006s14630g) mRNA, complete cds	gi|118485638|gb|ABK94669.1|	230	E:1e-73	unknown [Populus trichocarpa]	.	.	.	.	PSBX_SYNJB	45.4	E:2e-06	RecName: Full=Photosystem II reaction center X protein {ECO:0000255|HAMAP-Rule:MF_01386};^Bacteria; Cyanobacteria; Synechococcales; Synechococcaceae; Synechococcus	PF06596.10	PsbX	Photosystem II reaction centre X protein (PsbX)	.	.	.	ExpAA=33.68^PredHel=1^Topology=i90-112o	.	GO:0015979|photosynthesisGO:0015979|photosynthesis	.	GO:0016021|integral component of membrane;GO:0009523|photosystem II;GO:0042651|thylakoid membraneGO:0009523|photosystem II;GO:0016020|membrane
f2p60_746_33239	-1.2734	5.58908e-52	down	yes	-0.224546	0.00016982	down	no	0.0306241	0.759586	up	no	0.422316	6.56213e-05	up	no	0.452077	3.66761e-07	up	no	Gene.16057::PuPacbio_f2p60_746_transcript33239_g1::g.16057::m.16057	112-477[+]	gi|566176442|ref|XM_006381585.1|	1151	E:0	Populus trichocarpa membrane family protein (POPTR_0006s14630g) mRNA, complete cds	gi|566176443|ref|XP_006381647.1|	166	E:7e-49	membrane family protein [Populus trichocarpa]	.	.	.	.	PSBX_SYNJB	43.9	E:8e-06	RecName: Full=Photosystem II reaction center X protein {ECO:0000255|HAMAP-Rule:MF_01386};^Bacteria; Cyanobacteria; Synechococcales; Synechococcaceae; Synechococcus	PF06596.10	PsbX	Photosystem II reaction centre X protein (PsbX)	.	.	.	ExpAA=33.70^PredHel=1^Topology=i90-112o	.	GO:0015979|photosynthesisGO:0015979|photosynthesis	.	GO:0016021|integral component of membrane;GO:0009523|photosystem II;GO:0042651|thylakoid membraneGO:0009523|photosystem II;GO:0016020|membrane
f2p60_717_13796	-0.567546	0.000229904	down	no	0.375689	0.00116008	up	no	0.0975678	0.424085	up	no	0.621373	3.33873e-06	up	no	1.05788	2.17446e-07	up	yes	.	.	gi|566177832|ref|XM_002309436.2|	1230	E:0	Populus trichocarpa hypothetical protein (POPTR_0006s23890g) mRNA, complete cds	gi|224092099|ref|XP_002309472.1|	175	E:2e-52	hypothetical protein POPTR_0006s23890g [Populus trichocarpa]	.	.	.	.	.	.	.	.	.	.	.	.	.	.	.	.	.	.	.
f2p60_431_37275	0.665273	0.00100116	up	no	-0.197216	0.314185	down	no	-0.126241	0.523525	down	no	-1.16195	5.57855e-08	down	yes	-0.950157	5.41314e-06	down	no	.	.	gi|566156585|ref|XM_002302126.2|	689	E:0	Populus trichocarpa peroxidase precursor family protein (POPTR_0002s06590g) mRNA, complete cds	gi|224066611|ref|XP_002302162.1|	64.3	E:4e-10	peroxidase precursor family protein [Populus trichocarpa]	.	.	.	.	.	.	.	.	.	.	.	.	.	.	.	.	.	.	.
f2p60_380_37978	1.05543	0.000889836	up	yes	1.1563	0.000114951	up	yes	0.352676	0.264121	up	no	0.156293	0.60024	up	no	0.083909	0.778469	up	no	.	.	gi|118489116|gb|EF148393.1|	457	E:2e-125	Populus trichocarpa x Populus deltoides clone WS01314_F07 unknown mRNA	.	.	.	.	.	.	.	.	.	.	.	.	.	.	.	.	.	.	.	.	.	.	.
f5p60_867_12216	-1.027	5.24651e-15	down	yes	-0.690405	2.63527e-09	down	no	-0.188424	0.0875514	down	no	-0.47061	2.1821e-05	down	no	-0.228059	0.0661916	down	no	.	.	gi|566206785|ref|XM_002321593.2|	1417	E:0	Populus trichocarpa octicosapeptide/Phox/Bem1p domain-containing family protein (POPTR_0015s09500g) mRNA, complete cds	gi|224133658|ref|XP_002321629.1|	355	E:2e-121	octicosapeptide/Phox/Bem1p domain-containing family protein [Populus trichocarpa]	.	.	.	.	.	.	.	.	.	.	.	.	.	.	.	.	.	.	.
f3p60_1740_5653	-0.758954	7.7994e-05	down	no	0.0109535	0.94793	up	no	0.84863	9.64415e-09	up	no	1.06018	1.14859e-11	up	yes	1.6345	3.46356e-43	up	yes	.	.	gi|743872201|ref|XM_011035774.1|	800	E:0	PREDICTED: Populus euphratica uncharacterized LOC105132333 (LOC105132333), transcript variant X3, mRNA	gi|566184814|ref|XP_002312673.2|	103	E:3e-22	octicosapeptide/Phox/Bem1p domain-containing family protein [Populus trichocarpa]	.	.	.	.	.	.	.	.	.	.	.	.	.	.	.	.	.	.	.
f2p60_1166_9582	-1.69257	6.03145e-130	down	yes	-0.83865	1.13747e-43	down	no	-0.676212	2.46401e-21	down	no	-0.692615	1.26458e-12	down	no	-0.214037	0.0109712	down	no	Gene.5717::PuPacbio_f2p60_1166_transcript9582_g3::g.5717::m.5717	148-825[+]	gi|743872201|ref|XM_011035774.1|	1382	E:0	PREDICTED: Populus euphratica uncharacterized LOC105132333 (LOC105132333), transcript variant X3, mRNA	gi|566184812|ref|XP_006380005.1|	335	E:2e-111	hypothetical protein POPTR_0008s19040g [Populus trichocarpa]	.	.	.	.	.	.	.	.	PF00564.23	PB1	PB1 domain	.	.	.	.	.	.	GO:0005515|protein binding	.
f2p50_1852_22824	-1.56791	2.54981e-13	down	yes	-0.632682	0.00027094	down	no	-0.464047	0.00827687	down	no	0.086516	0.609734	up	no	0.473277	0.00348338	up	no	.	.	gi|743872201|ref|XM_011035774.1|	1639	E:0	PREDICTED: Populus euphratica uncharacterized LOC105132333 (LOC105132333), transcript variant X3, mRNA	gi|566184812|ref|XP_006380005.1|	259	E:2e-79	hypothetical protein POPTR_0008s19040g [Populus trichocarpa]	.	.	.	.	.	.	.	.	.	.	.	.	.	.	.	.	.	.	.
f2p34_1093_29056	-1.57415	2.01619e-87	down	yes	-1.04744	5.30255e-54	down	yes	-1.16347	1.59606e-52	down	yes	-1.07138	1.96377e-39	down	yes	-0.64114	6.59049e-12	down	no	Gene.14435::PuPacbio_f2p34_1093_transcript29056_g1::g.14435::m.14435	136-783[+]	gi|743872201|ref|XM_011035774.1|	1681	E:0	PREDICTED: Populus euphratica uncharacterized LOC105132333 (LOC105132333), transcript variant X3, mRNA	gi|566184812|ref|XP_006380005.1|	353	E:6e-119	hypothetical protein POPTR_0008s19040g [Populus trichocarpa]	.	.	.	.	.	.	.	.	PF00564.23	PB1	PB1 domain	.	.	.	.	.	.	GO:0005515|protein binding	.
f2p60_587_35404	-0.639134	0.257594	down	no	0.0108013	0.983624	up	no	1.22539	0.00130175	up	yes	0.361226	0.25582	up	no	-0.292172	0.336726	down	no	.	.	gi|157265589|gb|AC210129.1|	992	E:0	Populus trichocarpa clone POP009-F11, complete sequence	gi|566207945|ref|XP_006373583.1|	77.8	E:1e-15	hypothetical protein POPTR_0016s00610g [Populus trichocarpa]	.	.	.	.	.	.	.	.	.	.	.	.	.	.	.	.	.	.	.
f2p28_510_36372	-0.50631	0.320813	down	no	0.426845	0.321478	up	no	1.09894	0.00138814	up	yes	0.480362	0.142027	up	no	0.317489	0.32788	up	no	Gene.16613::PuPacbio_f2p28_510_transcript36372_g1::g.16613::m.16613	18-509[-]	gi|157265589|gb|AC210129.1|	869	E:0	Populus trichocarpa clone POP009-F11, complete sequence	gi|743893813|ref|XP_011040148.1|	75.5	E:6e-15	PREDICTED: glycine-rich cell wall structural protein-like [Populus euphratica]	.	.	.	.	.	.	.	.	.	.	.	.	.	.	ExpAA=22.64^PredHel=1^Topology=o124-146i	.	.	.	.
f2p60_536_360662	-1.12146	0.0059562	down	yes	-1.18851	0.00278646	down	yes	-1.12286	0.00132175	down	yes	-0.364395	0.235258	down	no	-0.382877	0.214607	down	no	.	.	gi|743840475|ref|XM_011027911.1|	717	E:0	PREDICTED: Populus euphratica regulatory protein NPR3-like (LOC105126893), transcript variant X1, mRNA	.	.	.	.	.	.	.	.	.	.	.	.	.	.	.	.	.	.	.	.	.	.	.
f2p60_2655_2399	-1.2571	6.26264e-40	down	yes	-1.2078	2.91333e-46	down	yes	-0.52289	2.89484e-05	down	no	-0.608893	8.16108e-08	down	no	-0.574268	1.34538e-08	down	no	Gene.1985::PuPacbio_f2p60_2655_transcript2399_g1::g.1985::m.1985	100-1509[+]	gi|566168534|ref|XM_006382190.1|	4311	E:0	Populus trichocarpa hypothetical protein (POPTR_0005s00350g) mRNA, complete cds	gi|566168535|ref|XP_006382252.1|	623	E:0	hypothetical protein POPTR_0005s00350g [Populus trichocarpa]	.	.	.	.	.	.	.	.	.	.	.	.	.	.	.	.	.	.	.
f3p60_300_17121	-1.68216	0.00292026	down	yes	-0.665002	0.194912	down	no	-0.397768	0.313007	down	no	-0.508056	0.120079	down	no	-0.0829376	0.802508	down	no	.	.	gi|566193345|ref|XM_002317255.2|	460	E:9e-127	Populus trichocarpa hypothetical protein (POPTR_0011s02560g) mRNA, complete cds	gi|566193346|ref|XP_002317291.2|	79.3	E:3e-16	hypothetical protein POPTR_0011s02560g [Populus trichocarpa]	.	.	.	.	.	.	.	.	.	.	.	.	.	.	.	.	.	.	.
f8p60_910_12226	0.191003	0.484935	up	no	1.04798	0.00164355	up	yes	0.557287	0.0437232	up	no	0.808581	4.94231e-05	up	no	0.836548	2.14169e-05	up	no	Gene.6709::PuPacbio_f8p60_910_transcript12226_g1::g.6709::m.6709	133-639[+]	gi|743865418|ref|XM_011033878.1|	1404	E:0	PREDICTED: Populus euphratica uncharacterized LOC105131087 (LOC105131087), mRNA	gi|224106331|ref|XP_002314132.1|	326	E:9e-110	hypothetical protein POPTR_0009s04580g [Populus trichocarpa]	.	.	.	.	.	.	.	.	.	.	.	.	.	.	.	.	.	.	.
f13p60_601_14927	3.01669	0	up	yes	1.5923	9.93743e-165	up	yes	1.03663	2.43592e-28	up	yes	1.07765	3.9033e-49	up	yes	0.76855	2.20273e-06	up	no	.	.	gi|118487899|gb|EF147769.1|	1002	E:0	Populus trichocarpa clone WS0124_O15 unknown mRNA	gi|566213348|ref|XP_006373502.1|	145	E:1e-41	ABA-inducible family protein [Populus trichocarpa]	.	.	.	.	.	.	.	.	.	.	.	.	.	.	.	.	.	.	.
f2p60_883_31385	-1.47212	3.71162e-41	down	yes	-1.35531	1.25882e-35	down	yes	-1.94883	1.02552e-61	down	yes	-1.46539	6.75596e-21	down	yes	-1.29868	7.00674e-13	down	yes	Gene.15373::PuPacbio_f2p60_883_transcript31385_g6::g.15373::m.15373	2-439[-]	gi|566186750|ref|XM_002313974.2|	1055	E:0	Populus trichocarpa las1-like family protein (POPTR_0009s07210g) mRNA, complete cds	gi|224106005|ref|XP_002314010.1|	372	E:5e-122	las1-like family protein [Populus trichocarpa]	.	.	.	.	.	.	.	.	.	.	.	.	.	.	.	.	.	.	.
f2p60_774_329814	-1.31298	2.23525e-06	down	yes	-1.31067	9.50296e-07	down	yes	-1.85854	9.79221e-12	down	yes	-1.079	8.01517e-06	down	yes	-1.17703	1.21833e-06	down	yes	Gene.15969::PuPacbio_f2p60_774_transcript32981_g14::g.15969::m.15969	2-313[-]	gi|566186750|ref|XM_002313974.2|	1022	E:0	Populus trichocarpa las1-like family protein (POPTR_0009s07210g) mRNA, complete cds	gi|224106005|ref|XP_002314010.1|	192	E:2e-94	las1-like family protein [Populus trichocarpa]	.	.	.	.	.	.	.	.	.	.	.	.	.	.	.	.	.	.	.
f2p60_946_30654	0.676756	0.146076	up	no	0.809389	0.062798	up	no	1.63704	1.81108e-06	up	yes	0.447875	0.181006	up	no	0.264889	0.423631	up	no	Gene.15084::PuPacbio_f2p60_946_transcript30654_g9::g.15084::m.15084	122-751[+]	gi|566259973|ref|XM_006389479.1|	1507	E:0	Populus trichocarpa hypothetical protein (POPTR_0022s00750g) mRNA, complete cds	gi|566259974|ref|XP_006389541.1|	400	E:4e-138	hypothetical protein POPTR_0022s00750g [Populus trichocarpa]	.	.	.	.	.	.	.	.	PF00903.24	Glyoxalase	Glyoxalase/Bleomycin resistance protein/Dioxygenase superfamily	.	.	.	.	.	.	.	.
f9p60_560_36082	1.6892	7.85298e-91	up	yes	1.40371	1.19253e-86	up	yes	2.8644	1.26037e-240	up	yes	1.55289	1.88104e-49	up	yes	0.826783	0.00194628	up	no	.	.	gi|165723349|gb|AC216677.1|	414	E:1e-112	Populus trichocarpa clone POP103-G02, complete sequence	.	.	.	.	.	.	.	.	.	.	.	.	.	.	.	.	.	.	.	.	.	.	.
f2p60_353_38095	1.35593	1.59336e-07	up	yes	0.5153	0.0451817	up	no	-0.469102	0.101773	down	no	-0.624774	0.0223194	down	no	-0.287836	0.284506	down	no	.	.	gi|160958603|emb|CU232220.1|	470	E:2e-129	Populus EST from mild drought-stressed leaves	.	.	.	.	.	.	.	.	.	.	.	.	.	.	.	.	.	.	.	.	.	.	.
f4p60_1169_28198	0.768231	3.49551e-34	up	no	1.11839	1.70702e-81	up	yes	1.16487	7.67039e-53	up	yes	0.55595	3.44227e-11	up	no	0.604838	3.24519e-18	up	no	Gene.14068::PuPacbio_f4p60_1169_transcript28198_g1::g.14068::m.14068	109-861[+]	gi|166157595|gb|AC216943.1|	1229	E:0	Populus trichocarpa clone POP051-N24, complete sequence	gi|566174014|ref|XP_006380915.1|	129	E:6e-32	hypothetical protein POPTR_0006s02010g [Populus trichocarpa]	.	.	.	.	NFM_CHICK	64.3	E:2e-10	RecName: Full=Neurofilament medium polypeptide;^Eukaryota; Metazoa; Chordata; Craniata; Vertebrata; Euteleostomi; Archelosauria; Archosauria; Dinosauria; Saurischia; Theropoda; Coelurosauria; Aves; Neognathae; Galloanserae; Galliformes; Phasianidae; Phasianinae; Gallus	PF00403.25	HMA	Heavy-metal-associated domain	ENOG410XPTM	Neurofilament	.	.	.	GO:0061564|axon developmentGO:0030001|metal ion transport	GO:0005198|structural molecule activityGO:0046872|metal ion binding	GO:0005883|neurofilament
f2p60_277_17204	2.5199	8.00149e-06	up	yes	2.38985	8.71226e-06	up	yes	1.08321	0.00259599	up	no	0.784068	0.00525848	up	no	0.371565	0.0812477	up	no	.	.	gi|566203344|ref|XM_002320154.2|	442	E:3e-121	Populus trichocarpa hydroquinone glucosyltransferase family protein (POPTR_0014s09180g) mRNA, complete cds	.	.	.	.	.	.	.	.	.	.	.	.	.	.	.	.	.	.	.	.	.	.	.
f2p60_337_38255	1.24813	0.0010039	up	yes	1.26216	0.000432011	up	yes	0.418416	0.235113	up	no	-0.0188271	0.954644	down	no	0.00578246	0.985781	up	no	.	.	gi|566256322|ref|XM_006388062.1|	510	E:1e-141	Populus trichocarpa hypothetical protein (POPTR_0323s00210g) mRNA, complete cds	gi|566256323|ref|XP_006388124.1|	78.6	E:1e-16	hypothetical protein POPTR_0323s00210g [Populus trichocarpa]	.	.	.	.	.	.	.	.	.	.	.	.	.	.	.	.	.	.	.
f4p60_717_33526	2.72322	6.7814e-74	up	yes	0.0954294	0.622019	up	no	1.447	2.58499e-20	up	yes	0.40395	0.101854	up	no	-0.166435	0.497615	down	no	Gene.16139::PuPacbio_f4p60_717_transcript33526_g2::g.16139::m.16139	115-519[+]	gi|743940794|ref|XM_011016569.1|	676	E:0	PREDICTED: Populus euphratica lysozyme D-like (LOC105118598), mRNA	gi|743940795|ref|XP_011014871.1|	53.1	E:2e-06	PREDICTED: lysozyme D-like [Populus euphratica]	.	.	.	.	.	.	.	.	.	.	.	.	.	.	.	.	.	.	.
f2p60_848_31877	-2.77203	9.24257e-179	down	yes	-4.40184	8.09129e-298	down	yes	-1.45654	2.54851e-53	down	yes	-1.06949	5.50194e-16	down	yes	-1.28789	9.44629e-28	down	yes	Gene.15575::PuPacbio_f2p60_848_transcript31877_g6::g.15575::m.15575	131-619[+]	gi|566215230|ref|XM_006372045.1|	1271	E:0	Populus trichocarpa hypothetical protein (POPTR_0018s10920g) mRNA, complete cds	gi|566215231|ref|XP_006372107.1|	56.6	E:3e-07	hypothetical protein POPTR_0018s10920g [Populus trichocarpa]	.	.	.	.	.	.	.	.	.	.	.	.	.	.	.	.	.	.	.
f2p60_290_38802	-1.06888	0.0243403	down	yes	-0.499241	0.215702	down	no	-0.505838	0.186866	down	no	-0.463865	0.157011	down	no	-0.232342	0.469941	down	no	.	.	gi|118485633|gb|EF146610.1|	451	E:5e-124	Populus trichocarpa clone WS01210_I16 unknown mRNA	.	.	.	.	.	.	.	.	.	.	.	.	.	.	.	.	.	.	.	.	.	.	.
f2p54_438_37163	0.635903	0.236611	up	no	1.66543	0.00190518	up	yes	0.379244	0.240213	up	no	0.412451	0.118307	up	no	0.396739	0.123626	up	no	.	.	gi|566186828|ref|XM_002313210.2|	520	E:2e-144	Populus trichocarpa asparagine synthetase family protein (POPTR_0009s07710g) mRNA, complete cds	.	.	.	.	.	.	.	.	.	.	.	.	.	.	.	.	.	.	.	.	.	.	.
f2p60_789_32711	-0.803893	0.14686	down	no	-0.560249	0.279934	down	no	2.36297	9.03095e-14	up	yes	-0.0599492	0.855506	down	no	-0.323313	0.317946	down	no	Gene.15885::PuPacbio_f2p60_789_transcript32711_g9::g.15885::m.15885	3-473[+]	gi|566178299|ref|XM_002308611.2|	1327	E:0	Populus trichocarpa hypothetical protein (POPTR_0006s26630g) mRNA, complete cds	gi|118486160|gb|ABK94923.1|	318	E:2e-104	unknown [Populus trichocarpa]	.	.	.	.	.	.	.	.	PF04862.11	DUF642	Protein of unknown function (DUF642)	.	.	.	.	.	.	.	.
f2p60_476_36748	-0.596907	0.010785	down	no	-0.432483	0.0458783	down	no	-0.220103	0.348809	down	no	-0.28871	0.319592	down	no	-1.46619	2.6763e-07	down	yes	.	.	gi|224100580|ref|XM_002311896.1|	743	E:0	Populus trichocarpa hypothetical protein (POPTR_0008s01770g) mRNA, complete cds	gi|224100581|ref|XP_002311932.1|	100	E:5e-25	hypothetical protein POPTR_0008s01770g [Populus trichocarpa]	.	.	.	.	.	.	.	.	.	.	.	.	.	.	.	.	.	.	.
f4p60_1442_25648	0.441725	NA	up	no	1.00709	3.25221e-66	up	yes	0.458309	2.63257e-08	up	no	-0.159906	0.0658747	down	no	-0.599465	1.49747e-09	down	no	Gene.12896::PuPacbio_f4p60_1442_transcript25648_g2::g.12896::m.12896	3-1070[+]	gi|566156664|ref|XM_006386254.1|	905	E:0	Populus trichocarpa hypothetical protein (POPTR_0002s070802g) mRNA, partial cds	gi|566156661|ref|XP_006386314.1|	160	E:3e-43	hypothetical protein POPTR_0002s070802g, partial [Populus trichocarpa]	.	.	.	.	EXTN3_ARATH	78.6	E:9e-15	RecName: Full=Extensin-3 {ECO:0000303|PubMed:11475326};^Eukaryota; Viridiplantae; Streptophyta; Embryophyta; Tracheophyta; Spermatophyta; Magnoliophyta; eudicotyledons; Gunneridae; Pentapetalae; rosids; malvids; Brassicales; Brassicaceae; Camelineae; Arabidopsis	.	.	.	ENOG41104BK	Extensin-like region	.	.	.	GO:0009664|plant-type cell wall organization	GO:0005199|structural constituent of cell wall	GO:0005576|extracellular region;GO:0009530|primary cell wall
f2p60_1680_23978	0.462311	8.78141e-14	up	no	1.03651	4.52078e-99	up	yes	0.436517	5.54369e-06	up	no	0.142582	0.0993611	up	no	-0.365225	0.000251617	down	no	Gene.12034::PuPacbio_f2p60_1680_transcript23978_g6::g.12034::m.12034	3-1190[+]	gi|566156660|ref|XM_006386252.1|	1035	E:0	Populus trichocarpa hypothetical protein (POPTR_0002s070802g) mRNA, partial cds	gi|566156661|ref|XP_006386314.1|	164	E:5e-44	hypothetical protein POPTR_0002s070802g, partial [Populus trichocarpa]	.	.	.	.	EXTN3_ARATH	75.5	E:1e-13	RecName: Full=Extensin-3 {ECO:0000303|PubMed:11475326};^Eukaryota; Viridiplantae; Streptophyta; Embryophyta; Tracheophyta; Spermatophyta; Magnoliophyta; eudicotyledons; Gunneridae; Pentapetalae; rosids; malvids; Brassicales; Brassicaceae; Camelineae; Arabidopsis	.	.	.	ENOG41104BK	Extensin-like region	.	.	.	GO:0009664|plant-type cell wall organization	GO:0005199|structural constituent of cell wall	GO:0005576|extracellular region;GO:0009530|primary cell wall
f2p60_398_37629	-1.11817	0.00163628	down	yes	-1.11455	0.000662693	down	yes	-1.0627	0.000395277	down	yes	-0.320011	0.213055	down	no	-0.143945	0.586787	down	no	.	.	gi|566163819|ref|XM_002304814.2|	590	E:2e-165	Populus trichocarpa hypothetical protein (POPTR_0003s20840g) mRNA, complete cds	.	.	.	.	.	.	.	.	.	.	.	.	.	.	.	.	.	.	.	.	.	.	.
f2p60_697_33859	0.650054	0.00253667	up	no	0.851705	1.31176e-05	up	no	1.31449	1.13094e-12	up	yes	0.660026	0.0112596	up	no	0.259974	0.290093	up	no	Gene.16221::PuPacbio_f2p60_697_transcript33859_g9::g.16221::m.16221	1-348[+]	gi|566179000|ref|XM_002310372.2|	1050	E:0	Populus trichocarpa hypothetical protein (POPTR_0007s01110g) mRNA, complete cds	gi|566179001|ref|XP_002310408.2|	175	E:2e-51	hypothetical protein POPTR_0007s01110g [Populus trichocarpa]	.	.	.	.	.	.	.	.	.	.	.	.	.	.	.	.	.	.	.
f5p60_1156_28414	-1.13818	1.92121e-76	down	yes	-0.803462	9.46047e-46	down	no	0.159268	0.0147778	up	no	0.299228	8.078e-08	up	no	0.420099	7.52896e-06	up	no	Gene.14163::PuPacbio_f5p60_1156_transcript28414_g1::g.14163::m.14163	96-923[+]	gi|566233330|ref|XM_002325843.2|	1914	E:0	Populus trichocarpa hypothetical protein (POPTR_0019s05950g) mRNA, complete cds	gi|224146096|ref|XP_002325879.1|	415	E:5e-142	hypothetical protein POPTR_0019s05950g [Populus trichocarpa]	.	.	.	.	.	.	.	.	.	.	.	.	.	.	ExpAA=22.69^PredHel=1^Topology=o252-274i	.	.	.	.
f4p60_3786_18292	3.4469	9.55641e-180	up	yes	2.89853	1.40291e-121	up	yes	2.92872	1.15973e-93	up	yes	1.69545	1.08473e-16	up	yes	1.53415	8.05225e-18	up	yes	Gene.8241::PuPacbio_f4p60_3786_transcript18292_g1::g.8241::m.8241	1725-2222[-]	gi|159459646|gb|AC214033.1|	4634	E:0	Populus trichocarpa clone POP046-C14, complete sequence	gi|566218296|ref|XP_006370827.1|	135	E:2e-51	hypothetical protein POPTR_0019s00405g [Populus trichocarpa]	.	.	.	.	.	.	.	.	.	.	.	.	.	.	.	.	.	.	.
f2p60_916_11786	-0.643775	4.18064e-05	down	no	-0.368695	0.0106441	down	no	-0.790986	1.50905e-06	down	no	0.36952	0.271019	up	no	-1.41487	9.36099e-17	down	yes	Gene.6550::PuPacbio_f2p60_916_transcript11786_g2::g.6550::m.6550	52-612[+]	gi|566188864|ref|XM_002315506.2|	1507	E:0	Populus trichocarpa hypothetical protein (POPTR_0010s02840g) mRNA, complete cds	gi|224110510|ref|XP_002315542.1|	278	E:1e-90	hypothetical protein POPTR_0010s02840g [Populus trichocarpa]	.	.	.	.	.	.	.	.	PF05078.11	DUF679	Protein of unknown function (DUF679)	.	.	.	ExpAA=71.92^PredHel=3^Topology=i52-74o113-135i148-170o	.	.	.	.
f2p60_364_37983	-1.24079	0.0099136	down	yes	-0.505612	0.225851	down	no	0.137256	0.693584	up	no	-0.351982	0.287356	down	no	-0.504192	0.127268	down	no	.	.	gi|566179032|ref|XM_002309727.2|	556	E:1e-155	Populus trichocarpa hypothetical protein (POPTR_0007s01310g) mRNA, complete cds	gi|566179026|ref|XP_006380278.1|	119	E:3e-34	hypothetical protein POPTR_0007s01270g [Populus trichocarpa]	.	.	.	.	.	.	.	.	.	.	.	.	.	.	.	.	.	.	.
f3p60_541_15665	2.07058	1.1247e-09	up	yes	1.60495	3.86307e-06	up	yes	1.47618	2.18251e-06	up	yes	1.0513	0.000511217	up	yes	1.0537	0.000650842	up	yes	.	.	gi|566199676|ref|XM_006375849.1|	536	E:3e-149	Populus trichocarpa hypothetical protein (POPTR_0013s05900g) mRNA, complete cds	.	.	.	.	.	.	.	.	.	.	.	.	.	.	.	.	.	.	.	.	.	.	.
f2p60_651_345120	1.85104	4.82126e-102	up	yes	1.32903	1.73579e-58	up	yes	1.31087	3.24349e-34	up	yes	0.890141	9.60221e-13	up	no	0.906521	1.69694e-16	up	no	Gene.16382::PuPacbio_f2p60_651_transcript34512_g10::g.16382::m.16382	2-355[+]	gi|566199676|ref|XM_006375849.1|	603	E:3e-169	Populus trichocarpa hypothetical protein (POPTR_0013s05900g) mRNA, complete cds	gi|743873119|ref|XP_011034314.1|	79.3	E:5e-16	PREDICTED: dehydrin DHN3 [Populus euphratica]	.	.	.	.	SRC1_SOYBN	53.1	E:8e-09	RecName: Full=Protein SRC1 {ECO:0000305};^Eukaryota; Viridiplantae; Streptophyta; Embryophyta; Tracheophyta; Spermatophyta; Magnoliophyta; eudicotyledons; Gunneridae; Pentapetalae; rosids; fabids; Fabales; Fabaceae; Papilionoideae; Phaseoleae; Glycine; Soja	.	.	.	ENOG41106RW	NA	.	.	.	.	GO:0046872|metal ion binding	.
f2p60_653_34458	-1.14463	0.0060639	down	yes	-1.67663	7.23544e-05	down	yes	-1.21947	0.000529658	down	yes	-1.31749	5.60429e-05	down	yes	-1.03892	0.00122724	down	yes	.	.	gi|566168459|ref|XM_006385093.1|	918	E:0	Populus trichocarpa cytochrome P450 family protein (POPTR_0004s24360g) mRNA, complete cds	.	.	.	.	.	.	.	.	.	.	.	.	.	.	.	.	.	.	.	.	.	.	.
f2p60_774_13373	-1.37911	5.16994e-17	down	yes	-0.403608	0.0014761	down	no	-1.82884	2.08108e-28	down	yes	-1.37578	5.18263e-09	down	yes	-1.25665	1.70831e-13	down	yes	Gene.7060::PuPacbio_f2p60_774_transcript13373_g9::g.7060::m.7060	2-436[+]	gi|566172745|ref|XM_002306715.2|	1303	E:0	Populus trichocarpa hypothetical protein (POPTR_0005s22650g) mRNA, complete cds	gi|224085387|ref|XP_002307561.1|	256	E:1e-83	hypothetical protein POPTR_0005s22660g [Populus trichocarpa]	.	.	.	.	.	.	.	.	.	.	.	.	.	.	.	.	.	.	.
f2p60_482_36687	0.599416	0.238101	up	no	2.42293	5.15041e-11	up	yes	0.900391	0.0164197	up	no	1.72305	4.02552e-08	up	yes	1.39002	1.29053e-05	up	yes	.	.	gi|118488363|gb|EF148005.1|	678	E:0	Populus trichocarpa clone WS0126_J20 unknown mRNA	gi|566202159|ref|XP_006374954.1|	154	E:9e-46	hypothetical protein POPTR_0014s03060g [Populus trichocarpa]	.	.	.	.	.	.	.	.	.	.	.	.	.	.	.	.	.	.	.
f3p60_616_35021	0.341334	0.0585881	up	no	1.28175	1.73253e-19	up	yes	1.18276	8.20284e-16	up	yes	0.87959	7.19779e-10	up	no	1.36355	2.9373e-21	up	yes	Gene.16476::PuPacbio_f3p60_616_transcript35021_g3::g.16476::m.16476	63-365[+]	gi|566157712|ref|XM_002301154.2|	1057	E:0	Populus trichocarpa hypothetical protein (POPTR_0002s12840g) mRNA, complete cds	gi|224063531|ref|XP_002301190.1|	206	E:2e-65	hypothetical protein POPTR_0002s12840g [Populus trichocarpa]	.	.	.	.	CML10_ORYSJ	45.4	E:7e-06	RecName: Full=Probable calcium-binding protein CML10;^Eukaryota; Viridiplantae; Streptophyta; Embryophyta; Tracheophyta; Spermatophyta; Magnoliophyta; Liliopsida; Poales; Poaceae; BOP clade; Oryzoideae; Oryzeae; Oryzinae; Oryza	PF13405.5	EF-hand_6	EF-hand domain	COG5126	Calcium-binding protein	.	.	.	.	GO:0005509|calcium ion bindingGO:0005509|calcium ion binding	.
f2p16_511_15749	-0.360815	0.393685	down	no	-1.11903	0.0091919	down	yes	-0.344568	0.32412	down	no	-0.302141	0.338808	down	no	0.0979804	0.752107	up	no	Gene.7528::PuPacbio_f2p16_511_transcript15749_g1::g.7528::m.7528	50-349[-]	gi|566150635|ref|XM_006369416.1|	701	E:0	Populus trichocarpa calcium-binding EF hand family protein (POPTR_0001s23820g) mRNA, complete cds	.	.	.	.	.	.	.	.	.	.	.	.	.	.	.	.	.	.	.	.	.	.	.
f10p60_905_31222	-1.15978	2.55037e-114	down	yes	-0.960268	8.15961e-116	down	no	-0.487452	4.87799e-19	down	no	-0.403886	NA	down	no	-0.173572	0.000451516	down	no	Gene.15324::PuPacbio_f10p60_905_transcript31222_g1::g.15324::m.15324	93-533[+]	gi|566150635|ref|XM_006369416.1|	1530	E:0	Populus trichocarpa calcium-binding EF hand family protein (POPTR_0001s23820g) mRNA, complete cds	gi|566150636|ref|XP_006369478.1|	295	E:3e-98	calcium-binding EF hand family protein [Populus trichocarpa]	.	.	.	.	.	.	.	.	PF00036.31	EF-hand_1	EF hand	.	.	.	.	.	.	GO:0005509|calcium ion binding	.
f2p60_1270_8723	-0.491893	2.96201e-05	down	no	-0.414485	0.0001815	down	no	-0.669228	1.8836e-07	down	no	-0.723682	1.15366e-07	down	no	-1.26618	3.03984e-19	down	yes	Gene.5344::PuPacbio_f2p60_1270_transcript8723_g1::g.5344::m.5344	89-1018[+]	gi|566186538|ref|XM_002313289.2|	1982	E:0	Populus trichocarpa hypothetical protein (POPTR_0009s06070g) mRNA, complete cds	gi|566186539|ref|XP_002313325.2|	530	E:0	hypothetical protein POPTR_0009s06070g [Populus trichocarpa]	.	.	.	.	BPS1_ARATH	60.8	E:3e-09	RecName: Full=Protein BPS1, chloroplastic;^Eukaryota; Viridiplantae; Streptophyta; Embryophyta; Tracheophyta; Spermatophyta; Magnoliophyta; eudicotyledons; Gunneridae; Pentapetalae; rosids; malvids; Brassicales; Brassicaceae; Camelineae; Arabidopsis	PF05633.10	BPS1	Protein BYPASS1-related	ENOG410YDX5	protein BPS1, chloroplastic-like	.	.	.	GO:0009793|embryo development ending in seed dormancy;GO:0048364|root development;GO:0048367|shoot system development	.	GO:0009507|chloroplast;GO:0005886|plasma membrane
f3p60_672_34222	-0.095459	0.144317	down	no	0.218366	1.47001e-05	up	no	1.29746	1.85674e-68	up	yes	1.09532	4.02612e-47	up	yes	0.674595	6.34754e-20	up	no	Gene.16319::PuPacbio_f3p60_672_transcript34222_g3::g.16319::m.16319	14-373[+]	gi|566182633|ref|XM_002312093.2|	918	E:0	Populus trichocarpa protease inhibitor/seed storage/lipid transfer family protein (POPTR_0008s06210g) mRNA, complete cds	gi|224101069|ref|XP_002312129.1|	244	E:2e-79	protease inhibitor/seed storage/lipid transfer family protein [Populus trichocarpa]	.	.	.	.	.	.	.	.	PF14368.5	LTP_2	Probable lipid transfer	.	.	.	ExpAA=18.28^PredHel=1^Topology=i7-29o	.	.	.	.
f4p60_771_32886	2.02505	2.2755e-242	up	yes	2.82912	0	up	yes	2.93717	0	up	yes	2.27353	1.8234e-248	up	yes	1.57352	5.60648e-93	up	yes	Gene.15936::PuPacbio_f4p60_771_transcript32886_g4::g.15936::m.15936	2-517[-]	gi|566183890|ref|XM_002312454.2|	1166	E:0	Populus trichocarpa hypothetical protein (POPTR_0008s14060g) mRNA, complete cds	gi|743785353|ref|XP_011024956.1|	203	E:6e-63	PREDICTED: non-specific lipid-transfer protein 4-like [Populus euphratica]	.	.	.	.	.	.	.	.	.	.	.	.	.	.	ExpAA=52.74^PredHel=2^Topology=i13-34o54-73i	.	.	.	.
f3p60_709_13906	1.90558	2.21259e-126	up	yes	2.5538	0	up	yes	2.55751	1.59199e-181	up	yes	1.98413	1.89657e-83	up	yes	1.02241	9.23497e-24	up	yes	.	.	gi|566190222|ref|XM_002314714.2|	1112	E:0	Populus trichocarpa protease inhibitor/seed storage/lipid transfer family protein (POPTR_0010s11080g) mRNA, complete cds	gi|224108181|ref|XP_002314750.1|	186	E:7e-57	protease inhibitor/seed storage/lipid transfer family protein [Populus trichocarpa]	.	.	.	.	.	.	.	.	.	.	.	.	.	.	.	.	.	.	.
f2p60_872_31557	2.30999	2.83287e-189	up	yes	2.81255	0	up	yes	3.02537	1.07725e-191	up	yes	2.51199	1.01445e-123	up	yes	2.03491	8.74375e-52	up	yes	Gene.15434::PuPacbio_f2p60_872_transcript31557_g4::g.15434::m.15434	2-517[-]	gi|566183890|ref|XM_002312454.2|	1432	E:0	Populus trichocarpa hypothetical protein (POPTR_0008s14060g) mRNA, complete cds	gi|743785353|ref|XP_011024956.1|	203	E:2e-62	PREDICTED: non-specific lipid-transfer protein 4-like [Populus euphratica]	.	.	.	.	.	.	.	.	.	.	.	.	.	.	ExpAA=52.74^PredHel=2^Topology=i13-34o54-73i	.	.	.	.
f2p60_668_14287	0.3659	1.24986e-06	up	no	0.341548	1.66735e-06	up	no	1.48079	2.65167e-48	up	yes	1.43395	1.86335e-67	up	yes	0.245631	0.381189	up	no	Gene.7308::PuPacbio_f2p60_668_transcript14287_g1::g.7308::m.7308	57-407[+]	gi|566209554|ref|XM_002323494.2|	1027	E:0	Populus trichocarpa protease inhibitor/seed storage/lipid transfer family protein (POPTR_0016s10140g) mRNA, complete cds	gi|224140319|ref|XP_002323530.1|	182	E:2e-55	protease inhibitor/seed storage/lipid transfer family protein [Populus trichocarpa]	.	.	.	.	.	.	.	.	PF14368.5	LTP_2	Probable lipid transfer	.	.	.	.	.	.	.	.
f2p23_978_30306	-0.650009	3.07104e-20	down	no	-1.17236	1.09234e-61	down	yes	0.0167031	0.809388	up	no	-0.402295	0.000933857	down	no	-0.549429	0.000116197	down	no	Gene.14935::PuPacbio_f2p23_978_transcript30306_g1::g.14935::m.14935	1-681[+]	gi|566172091|ref|XM_006383482.1|	1640	E:0	Populus trichocarpa hypothetical protein (POPTR_0005s18840g) mRNA, complete cds	.	.	.	.	.	.	.	.	AGP18_ARATH	70.9	E:1e-13	RecName: Full=Lysine-rich arabinogalactan protein 18;^Eukaryota; Viridiplantae; Streptophyta; Embryophyta; Tracheophyta; Spermatophyta; Magnoliophyta; eudicotyledons; Gunneridae; Pentapetalae; rosids; malvids; Brassicales; Brassicaceae; Camelineae; Arabidopsis	.	.	.	ENOG41119DP	NA	.	.	.	GO:0009554|megasporogenesis	.	GO:0031225|anchored component of membrane;GO:0005886|plasma membrane
f2p60_430_37245	-0.0456399	0.881674	down	no	1.51884	3.70362e-12	up	yes	0.504666	0.0386595	up	no	0.441557	0.0669366	up	no	0.514343	0.0349018	up	no	.	.	gi|118489867|gb|EF148777.1|	568	E:8e-159	Populus trichocarpa x Populus deltoides clone WS0137_M09 unknown mRNA	gi|566193768|ref|XP_006377330.1|	73.2	E:9e-14	hypothetical protein POPTR_0011s04960g [Populus trichocarpa]	.	.	.	.	.	.	.	.	.	.	.	.	.	.	.	.	.	.	.
f9p60_1299_8575	-1.04714	3.20012e-43	down	yes	-0.74679	2.3502e-27	down	no	-0.624808	2.35925e-17	down	no	-0.23677	0.000811948	down	no	0.0548059	0.490558	up	no	Gene.5270::PuPacbio_f9p60_1299_transcript8575_g1::g.5270::m.5270	126-1148[+]	gi|566167792|ref|XM_006384761.1|	2228	E:0	Populus trichocarpa hypothetical protein (POPTR_0004s21380g) mRNA, complete cds	gi|566167793|ref|XP_006384823.1|	655	E:0	hypothetical protein POPTR_0004s21380g [Populus trichocarpa]	.	.	.	.	.	.	.	.	PF12146.7	Hydrolase_4	Serine aminopeptidase, S33	.	.	.	.	.	.	.	.
f2p60_419_37399	-0.917655	0.0334551	down	no	-1.01722	0.0157727	down	yes	-0.411712	0.218566	down	no	-0.569858	0.0877022	down	no	-0.861838	0.00695521	down	no	.	.	gi|566175373|ref|XM_002309060.2|	695	E:0	Populus trichocarpa ENOD18 family protein (POPTR_0006s09380g) mRNA, complete cds	gi|224090821|ref|XP_002309096.1|	137	E:1e-38	ENOD18 family protein [Populus trichocarpa]	.	.	.	.	.	.	.	.	.	.	.	.	.	.	.	.	.	.	.
f2p60_342_38201	2.31786	2.28994e-05	up	yes	1.29247	0.0161012	up	yes	0.657407	0.0673694	up	no	0.41253	0.11531	up	no	-0.107629	0.390901	down	no	.	.	gi|162532379|gb|AC215851.1|	455	E:5e-125	Populus trichocarpa clone POP032-F08, complete sequence	gi|566201921|ref|XP_006374842.1|	52.4	E:3e-06	hypothetical protein POPTR_0014s01950g [Populus trichocarpa]	.	.	.	.	.	.	.	.	.	.	.	.	.	.	.	.	.	.	.
f2p60_511_15771	1.92883	0.000422777	up	yes	-0.0616454	0.904387	down	no	0.768174	0.0453631	up	no	0.0819546	0.786758	up	no	0.0732809	0.825686	up	no	.	.	gi|566197058|ref|XM_006376717.1|	832	E:0	Populus trichocarpa aconitate hydratase family protein (POPTR_0012s06320g) mRNA, complete cds	.	.	.	.	.	.	.	.	.	.	.	.	.	.	.	.	.	.	.	.	.	.	.
f2p60_541_15614	-1.05937	0.00074397	down	yes	-0.956968	0.00256235	down	no	-0.486827	0.0843454	down	no	-0.221092	0.443125	down	no	-0.198713	0.412975	down	no	.	.	gi|566212041|ref|XM_002323927.2|	693	E:0	Populus trichocarpa hypothetical protein (POPTR_0017s07630g) mRNA, complete cds	gi|566212042|ref|XP_002323963.2|	115	E:9e-28	hypothetical protein POPTR_0017s07630g [Populus trichocarpa]	.	.	.	.	.	.	.	.	.	.	.	.	.	.	.	.	.	.	.
f2p60_322_385861	1.58982	0.00123898	up	yes	0.99097	0.047316	up	no	0.402522	0.306038	up	no	0.128313	0.680374	up	no	-0.244226	0.398515	down	no	.	.	gi|566177848|ref|XM_002308501.2|	488	E:5e-135	Populus trichocarpa heat shock protein 17.7 (POPTR_0006s24030g) mRNA, complete cds	.	.	.	.	.	.	.	.	.	.	.	.	.	.	.	.	.	.	.	.	.	.	.
f8p60_610_35298	1.16127	0.000721112	up	yes	0.0117716	0.976902	up	no	-0.270649	0.446313	down	no	-1.4747	1.07522e-05	down	yes	-0.901905	0.00629132	down	no	.	.	gi|566187481|ref|XM_006379169.1|	797	E:0	Populus trichocarpa hypothetical protein (POPTR_0009s11500g) mRNA, complete cds	gi|566187482|ref|XP_006379231.1|	108	E:3e-27	hypothetical protein POPTR_0009s11500g [Populus trichocarpa]	.	.	.	.	.	.	.	.	.	.	.	.	.	.	.	.	.	.	.
f7p60_2798_2119	-1.03337	1.17318e-33	down	yes	-0.548296	2.62825e-12	down	no	-0.679235	2.43686e-12	down	no	-0.267219	NA	down	no	-0.377265	0.0215631	down	no	Gene.1837::PuPacbio_f7p60_2798_transcript2119_g1::g.1837::m.1837	2-2329[+]	gi|566155476|ref|XM_002300570.2|	4819	E:0	Populus trichocarpa hypothetical protein (POPTR_0002s00310g) mRNA, complete cds	gi|566155477|ref|XP_002300606.2|	1142	E:0	hypothetical protein POPTR_0002s00310g [Populus trichocarpa]	.	.	.	.	.	.	.	.	.	.	.	.	.	.	.	.	.	.	.
f7p60_1314_26860	-1.38928	0.000500363	down	yes	-0.707282	2.38746e-06	down	no	-0.234191	0.463108	down	no	0.385262	0.0875513	up	no	0.428186	0.0227532	up	no	Gene.13468::PuPacbio_f7p60_1314_transcript26860_g1::g.13468::m.13468	111-1115[+]	gi|566179536|ref|XM_002309880.2|	2141	E:0	Populus trichocarpa hypothetical protein (POPTR_0007s04180g) mRNA, complete cds	gi|743827703|ref|XP_011023091.1|	583	E:0	PREDICTED: uncharacterized protein LOC105124685 [Populus euphratica]	.	.	.	.	.	.	.	.	.	.	.	.	.	.	ExpAA=143.18^PredHel=6^Topology=i30-52o101-123i144-166o181-212i233-255o265-287i	.	.	.	.
f7p60_1063_10693	0.73682	3.36441e-26	up	no	1.87496	1.01623e-201	up	yes	1.52174	2.99615e-93	up	yes	0.943318	1.72828e-37	up	no	-0.002535	0.992315	down	no	Gene.6151::PuPacbio_f7p60_1063_transcript10693_g2::g.6151::m.6151	2-703[+]	gi|164498902|gb|AC216413.1|	1775	E:0	Populus trichocarpa clone POP035-J17, complete sequence	gi|743886935|ref|XP_011037985.1|	201	E:2e-55	PREDICTED: uncharacterized protein LOC105135011 [Populus euphratica]	.	.	.	.	.	.	.	.	.	.	.	.	.	.	.	.	.	.	.
f6p60_692_13900	-1.29368	1.323e-85	down	yes	-0.448291	4.11961e-11	down	no	-0.412895	0.000572396	down	no	-0.152018	0.218154	down	no	-0.148149	0.0806412	down	no	Gene.7204::PuPacbio_f6p60_692_transcript13900_g1::g.7204::m.7204	1-447[+]	gi|566167033|ref|XM_002305448.2|	1175	E:0	Populus trichocarpa hypothetical protein (POPTR_0004s17500g) mRNA, complete cds	gi|224078081|ref|XP_002305484.1|	219	E:1e-69	hypothetical protein POPTR_0004s17500g [Populus trichocarpa]	.	.	.	.	.	.	.	.	.	.	.	.	.	.	ExpAA=61.51^PredHel=3^Topology=o39-61i74-93o119-136i	.	.	.	.
f6p60_678_34118	4.84154	2.18433e-22	up	yes	5.1485	1.916e-28	up	yes	0.261525	0.233149	up	no	0.162911	0.281331	up	no	#N/A	#N/A	#N/A	#N/A	Gene.16284::PuPacbio_f6p60_678_transcript34118_g1::g.16284::m.16284	43-351[-]	gi|566174749|ref|XM_006381019.1|	569	E:4e-159	Populus trichocarpa hypothetical protein (POPTR_0006s06090g) mRNA, complete cds	gi|566174750|ref|XP_006381081.1|	159	E:1e-46	hypothetical protein POPTR_0006s06090g [Populus trichocarpa]	.	.	.	.	.	.	.	.	.	.	.	.	.	.	.	.	.	.	.
f6p60_617_34989	1.25829	5.70703e-16	up	yes	1.04851	1.24995e-13	up	yes	0.719417	1.82399e-05	up	no	-1.21589	0.00015351	down	yes	-1.4697	7.78093e-08	down	yes	.	.	gi|566255395|ref|XM_006387726.1|	553	E:3e-154	Populus trichocarpa hypothetical protein (POPTR_0580s00210g) mRNA, complete cds	gi|566187482|ref|XP_006379231.1|	87.4	E:2e-19	hypothetical protein POPTR_0009s11500g [Populus trichocarpa]	.	.	.	.	.	.	.	.	.	.	.	.	.	.	.	.	.	.	.
f5p60_744_33251	1.08057	0.000182537	up	yes	0.182878	0.562155	up	no	0.986541	0.000959937	up	no	0.0367038	0.904962	up	no	0.44068	0.148035	up	no	Gene.16060::PuPacbio_f5p60_744_transcript33251_g1::g.16060::m.16060	106-591[+]	.	.	.	.	gi|566198530|ref|XP_002318892.2|	127	E:2e-33	hypothetical protein POPTR_0012s14800g [Populus trichocarpa]	.	.	.	.	.	.	.	.	.	.	.	.	.	.	.	.	.	.	.
f5p60_642_34624	-1.0789	1.14059e-35	down	yes	-0.676664	1.27211e-12	down	no	-0.187056	0.0962691	down	no	-0.299726	0.00037501	down	no	-0.179441	0.122229	down	no	.	.	gi|118481788|gb|EF144599.1|	972	E:0	Populus trichocarpa clone WS01111_K14 unknown mRNA	gi|566172203|ref|XP_006383564.1|	134	E:4e-37	hypothetical protein POPTR_0005s19400g [Populus trichocarpa]	.	.	.	.	.	.	.	.	.	.	.	.	.	.	.	.	.	.	.
f5p60_638_34690	5.70569	0	up	yes	6.21815	0	up	yes	5.16242	5.20815e-269	up	yes	2.93008	2.69605e-75	up	yes	3.55152	1.74882e-109	up	yes	.	.	gi|743923350|ref|XR_839680.1|	902	E:0	PREDICTED: Populus euphratica uncharacterized LOC105111946 (LOC105111946), ncRNA	gi|224089519|ref|XP_002308743.1|	54.7	E:7e-15	hypothetical protein POPTR_0006s00430g [Populus trichocarpa]	.	.	.	.	.	.	.	.	.	.	.	.	.	.	.	.	.	.	.
f5p60_528_36195	-1.11092	0.000577241	down	yes	-0.969312	0.000423005	down	no	-0.322064	0.198861	down	no	-0.458247	0.117846	down	no	-0.593731	0.0278049	down	no	Gene.16604::PuPacbio_f5p60_528_transcript36195_g2::g.16604::m.16604	3-362[+]	gi|168176843|gb|AC217587.1|	850	E:0	Populus trichocarpa clone POP031-F05, complete sequence	gi|566208881|ref|XP_002322718.2|	189	E:8e-59	hypothetical protein POPTR_0016s05620g, partial [Populus trichocarpa]	.	.	.	.	.	.	.	.	.	.	.	.	.	.	.	.	.	.	.
f4p60_920_31025	0.391489	0.466582	up	no	1.13103	0.0354814	up	no	2.18234	2.10937e-08	up	yes	0.675075	0.0211782	up	no	0.553746	0.0552121	up	no	.	.	gi|743864590|ref|XM_011033656.1|	652	E:0	PREDICTED: Populus euphratica vegetative cell wall protein gp1 (LOC105130928), mRNA	gi|566161489|ref|XP_006385552.1|	55.1	E:2e-06	hypothetical protein POPTR_0003s08030g [Populus trichocarpa]	.	.	.	.	.	.	.	.	.	.	.	.	.	.	.	.	.	.	.
f4p60_678_14205	0.332207	6.39046e-07	up	no	1.17949	2.16826e-79	up	yes	1.74891	5.11843e-126	up	yes	1.35706	9.50718e-68	up	yes	1.2211	4.69489e-45	up	yes	Gene.7296::PuPacbio_f4p60_678_transcript14205_g2::g.7296::m.7296	1-324[+]	gi|168176841|gb|AC217585.1|	490	E:3e-135	Populus trichocarpa clone POP021-H02, complete sequence	.	.	.	.	.	.	.	.	SRC1_SOYBN	55.5	E:1e-09	RecName: Full=Protein SRC1 {ECO:0000305};^Eukaryota; Viridiplantae; Streptophyta; Embryophyta; Tracheophyta; Spermatophyta; Magnoliophyta; eudicotyledons; Gunneridae; Pentapetalae; rosids; fabids; Fabales; Fabaceae; Papilionoideae; Phaseoleae; Glycine; Soja	.	.	.	ENOG41106RW	NA	.	.	.	.	GO:0046872|metal ion binding	.
f4p60_1414_25902	1.09936	9.64209e-15	up	yes	0.269457	0.0621706	up	no	0.273814	0.150792	up	no	0.00752868	0.968593	up	no	0.0619819	0.750218	up	no	Gene.13018::PuPacbio_f4p60_1414_transcript25902_g4::g.13018::m.13018	462-791[-]	gi|167963537|gb|AC217569.1|	612	E:1e-171	Populus trichocarpa clone POP004-D09, complete sequence	gi|566208062|ref|XP_002323155.2|	142	E:3e-37	hypothetical protein POPTR_0016s01300g [Populus trichocarpa]	.	.	.	.	.	.	.	.	.	.	.	.	.	.	.	.	.	.	.
f4p60_1127_9962	1.24939	1.29446e-48	up	yes	0.251224	0.0121229	up	no	0.348259	0.0011902	up	no	-0.149425	0.248927	down	no	-0.390698	0.00044391	down	no	Gene.5855::PuPacbio_f4p60_1127_transcript9962_g1::g.5855::m.5855	131-766[+]	gi|566214986|ref|XM_002324411.2|	1773	E:0	Populus trichocarpa hypothetical protein (POPTR_0018s09360g) mRNA, complete cds	gi|566214987|ref|XP_002324447.2|	435	E:7e-151	hypothetical protein POPTR_0018s09360g [Populus trichocarpa]	.	.	.	.	.	.	.	.	PF05553.10	DUF761	Cotton fibre expressed protein	.	.	.	.	.	.	.	.
f3p60_959_30470	-1.60095	3.8916e-51	down	yes	-1.04116	1.57246e-27	down	yes	-0.0899584	0.345441	down	no	-0.786347	8.5882e-12	down	no	-0.718641	1.04325e-09	down	no	Gene.15000::PuPacbio_f3p60_959_transcript30470_g2::g.15000::m.15000	3-536[+]	gi|566208105|ref|XM_002323122.2|	1637	E:0	Populus trichocarpa hypothetical protein (POPTR_0016s01450g) mRNA, complete cds	.	.	.	.	.	.	.	.	.	.	.	.	.	.	.	.	.	.	.	.	.	.	.
f3p60_702_13975	-1.873	2.24218e-110	down	yes	-0.546183	1.46765e-17	down	no	0.137649	0.0434983	up	no	0.00464999	0.974441	up	no	0.407227	NA	up	no	Gene.7219::PuPacbio_f3p60_702_transcript13975_g3::g.7219::m.7219	2-328[+]	gi|566205672|ref|XM_002322020.2|	1162	E:0	Populus trichocarpa hypothetical protein (POPTR_0015s03670g) mRNA, complete cds	gi|566205673|ref|XP_002322056.2|	189	E:5e-57	hypothetical protein POPTR_0015s03670g [Populus trichocarpa]	.	.	.	.	.	.	.	.	.	.	.	.	.	.	.	.	.	.	.
f3p60_665_34259	1.86037	9.46743e-27	up	yes	2.94099	2.66802e-97	up	yes	1.75588	1.68831e-23	up	yes	1.74985	8.31232e-16	up	yes	0.289271	0.205649	up	no	.	.	gi|566255178|ref|XM_006387649.1|	1007	E:0	Populus trichocarpa hypothetical protein (POPTR_0650s00210g) mRNA, complete cds	gi|566255179|ref|XP_006387711.1|	181	E:2e-55	hypothetical protein POPTR_0650s00210g [Populus trichocarpa]	.	.	.	.	.	.	.	.	.	.	.	.	.	.	.	.	.	.	.
f3p60_661_14389	-0.904458	8.18757e-07	down	no	-1.33894	2.37521e-14	down	yes	-2.20403	2.55285e-28	down	yes	-1.42911	2.87925e-11	down	yes	-1.71843	1.28365e-08	down	yes	.	.	.	.	.	.	.	.	.	.	.	.	.	.	.	.	.	.	.	.	.	.	.	.	.	.	.	.	.
f3p60_638_14581	-0.370333	0.000807971	down	no	-1.6287	9.44878e-39	down	yes	-1.40992	3.62724e-28	down	yes	-1.00132	3.28673e-19	down	yes	-0.267617	0.041036	down	no	.	.	gi|566174414|ref|XM_002307962.2|	1046	E:0	Populus trichocarpa hypothetical protein (POPTR_0006s04290g) mRNA, complete cds	gi|224086894|ref|XP_002307998.1|	161	E:6e-48	hypothetical protein POPTR_0006s04290g [Populus trichocarpa]	.	.	.	.	.	.	.	.	.	.	.	.	.	.	.	.	.	.	.
f3p60_635_14626	-1.1449	1.57865e-59	down	yes	-0.931553	6.9484e-42	down	no	-0.52479	2.5593e-08	down	no	0.117067	0.40019	up	no	0.348029	0.00043917	up	no	.	.	gi|118487071|gb|EF147349.1|	942	E:0	Populus trichocarpa clone WS0122_N18 unknown mRNA	gi|566215469|ref|XP_006372139.1|	51.6	E:2e-06	hypothetical protein POPTR_0018s12270g [Populus trichocarpa]	.	.	.	.	.	.	.	.	.	.	.	.	.	.	.	.	.	.	.
f3p60_611_14973	-0.167008	0.0247949	down	no	0.399595	5.5212e-09	up	no	1.01196	3.36772e-31	up	yes	0.724051	2.55187e-14	up	no	0.88544	2.08146e-18	up	no	Gene.7446::PuPacbio_f3p60_611_transcript14973_g1::g.7446::m.7446	1-324[+]	gi|168176841|gb|AC217585.1|	568	E:1e-158	Populus trichocarpa clone POP021-H02, complete sequence	.	.	.	.	.	.	.	.	SRC1_SOYBN	65.5	E:2e-13	RecName: Full=Protein SRC1 {ECO:0000305};^Eukaryota; Viridiplantae; Streptophyta; Embryophyta; Tracheophyta; Spermatophyta; Magnoliophyta; eudicotyledons; Gunneridae; Pentapetalae; rosids; fabids; Fabales; Fabaceae; Papilionoideae; Phaseoleae; Glycine; Soja	.	.	.	ENOG41106RW	NA	.	.	.	.	GO:0046872|metal ion binding	.
f3p60_608_35236	-1.38391	3.88708e-16	down	yes	-0.729763	5.72288e-07	down	no	-0.84845	4.98695e-05	down	no	-0.817115	6.16766e-07	down	no	-0.582739	0.00107268	down	no	.	.	gi|566187395|ref|XM_006379150.1|	749	E:0	Populus trichocarpa hypothetical protein (POPTR_0009s11030g) mRNA, complete cds	gi|223538870|gb|EEF40468.1|	73.9	E:1e-14	conserved hypothetical protein [Ricinus communis]	.	.	.	.	.	.	.	.	.	.	.	.	.	.	.	.	.	.	.
f3p60_579_15104	0.740321	7.49714e-20	up	no	1.28074	5.11258e-63	up	yes	1.09842	5.68351e-16	up	yes	1.09148	3.29855e-12	up	yes	-0.353407	0.025245	down	no	.	.	gi|566151316|ref|XM_002299913.2|	366	E:4e-98	Populus trichocarpa hypothetical protein (POPTR_0001s27540g) mRNA, complete cds	gi|224059644|ref|XP_002299949.1|	99.4	E:3e-24	hypothetical protein POPTR_0001s27540g [Populus trichocarpa]	.	.	.	.	.	.	.	.	.	.	.	.	.	.	.	.	.	.	.
f3p60_532_36081	1.32163	1.3004e-19	up	yes	1.23851	9.6308e-18	up	yes	0.582468	0.000309707	up	no	0.135672	0.433557	up	no	-0.221831	0.21204	down	no	.	.	gi|165905721|gb|AC216690.1|	741	E:0	Populus trichocarpa clone POP101-O19, complete sequence	gi|224134344|ref|XP_002321796.1|	125	E:1e-34	hypothetical protein POPTR_0015s15830g [Populus trichocarpa]	.	.	.	.	.	.	.	.	.	.	.	.	.	.	.	.	.	.	.
f3p60_459_36946	1.0648	1.86986e-06	up	yes	1.03853	1.86687e-07	up	yes	1.16178	2.91251e-09	up	yes	1.21477	3.80241e-09	up	yes	0.83888	4.36112e-05	up	no	.	.	gi|118484089|gb|EF145803.1|	695	E:0	Populus trichocarpa clone WS0113_H20 unknown mRNA	gi|118484090|gb|ABK93930.1|	68.2	E:5e-13	unknown [Populus trichocarpa]	.	.	.	.	.	.	.	.	.	.	.	.	.	.	.	.	.	.	.
f3p60_449_16258	0.203871	0.439643	up	no	-0.412123	0.112595	down	no	-0.655506	0.0196686	down	no	-1.43492	3.76379e-06	down	yes	-2.27743	3.66115e-13	down	yes	.	.	gi|566187481|ref|XM_006379169.1|	628	E:4e-177	Populus trichocarpa hypothetical protein (POPTR_0009s11500g) mRNA, complete cds	gi|566187482|ref|XP_006379231.1|	107	E:7e-28	hypothetical protein POPTR_0009s11500g [Populus trichocarpa]	.	.	.	.	.	.	.	.	.	.	.	.	.	.	.	.	.	.	.
f3p60_1575_24633	0.945806	1.36165e-40	up	no	1.01518	1.40365e-73	up	yes	0.24813	0.0469124	up	no	-0.466498	5.08094e-10	down	no	-0.733707	1.22123e-09	down	no	Gene.12387::PuPacbio_f3p60_1575_transcript24633_g4::g.12387::m.12387	1-1206[+]	gi|164498902|gb|AC216413.1|	1853	E:0	Populus trichocarpa clone POP035-J17, complete sequence	gi|743886935|ref|XP_011037985.1|	318	E:3e-96	PREDICTED: uncharacterized protein LOC105135011 [Populus euphratica]	.	.	.	.	.	.	.	.	.	.	.	.	.	.	ExpAA=20.18^PredHel=1^Topology=i21-43o	.	.	.	.
f3p60_1194_9387	0.757186	7.8272e-13	up	no	0.614264	3.55703e-09	up	no	1.19389	5.0794e-29	up	yes	0.709367	2.33096e-10	up	no	0.415026	0.000398559	up	no	Gene.5619::PuPacbio_f3p60_1194_transcript9387_g2::g.5619::m.5619	356-1048[+]	gi|566236702|ref|XM_002325891.2|	1753	E:0	Populus trichocarpa hypothetical protein (POPTR_0019s08630g) mRNA, complete cds	gi|743944581|ref|XP_011016808.1|	434	E:9e-150	PREDICTED: uncharacterized protein LOC105120341 [Populus euphratica]	.	.	.	.	.	.	.	.	.	.	.	.	.	.	.	.	.	.	.
f3p57_777_32845	0.942365	3.35031e-10	up	no	2.03958	2.08247e-65	up	yes	2.11205	4.33784e-61	up	yes	2.13785	9.85911e-62	up	yes	1.98405	1.08105e-60	up	yes	.	.	gi|566214407|ref|XM_002324379.2|	1301	E:0	Populus trichocarpa hypothetical protein (POPTR_0018s05860g) mRNA, complete cds	gi|224142137|ref|XP_002324415.1|	152	E:1e-43	hypothetical protein POPTR_0018s05860g [Populus trichocarpa]	.	.	.	.	.	.	.	.	.	.	.	.	.	.	.	.	.	.	.
f3p50_1460_7347	-0.948777	8.14708e-30	down	no	-0.92225	7.39252e-20	down	no	-1.2383	7.29921e-42	down	yes	-0.913201	6.27263e-18	down	no	-1.04879	6.07608e-17	down	yes	.	.	gi|743923693|ref|XM_011007646.1|	1480	E:0	PREDICTED: Populus euphratica protein RADIALIS-like 4 (LOC105112076), mRNA	gi|566158809|ref|XP_006386690.1|	131	E:6e-34	hypothetical protein POPTR_0002s18910g [Populus trichocarpa]	.	.	.	.	.	.	.	.	.	.	.	.	.	.	.	.	.	.	.
f2p60_932_30809	-0.638144	4.90112e-12	down	no	-1.16292	8.47628e-36	down	yes	-0.933944	3.39151e-16	down	no	-0.323624	0.0139308	down	no	-0.786845	8.51925e-15	down	no	Gene.15142::PuPacbio_f2p60_932_transcript30809_g7::g.15142::m.15142	73-678[+]	gi|118485276|gb|EF146422.1|	1580	E:0	Populus trichocarpa clone WS0118_A24 unknown mRNA	gi|566200727|ref|XP_006376279.1|	291	E:1e-95	hypothetical protein POPTR_0013s11610g [Populus trichocarpa]	.	.	.	.	.	.	.	.	PF05097.11	DUF688	Protein of unknown function (DUF688)	.	.	.	.	.	.	.	.
f2p60_910_30962	-0.0818336	0.550838	down	no	0.960345	8.63385e-20	up	no	1.17466	4.51045e-28	up	yes	0.510176	4.00915e-05	up	no	0.355745	0.00448972	up	no	.	.	gi|566164752|ref|XM_002304971.2|	1415	E:0	Populus trichocarpa hypothetical protein (POPTR_0004s03670g) mRNA, complete cds	gi|566164753|ref|XP_002305007.2|	132	E:2e-34	hypothetical protein POPTR_0004s03670g [Populus trichocarpa]	.	.	.	.	.	.	.	.	.	.	.	.	.	.	.	.	.	.	.
f2p60_905_12090	0.61008	0.113371	up	no	1.58975	2.0422e-07	up	yes	0.8165	0.0133858	up	no	0.0259478	0.936467	up	no	0.452578	0.15252	up	no	Gene.6650::PuPacbio_f2p60_905_transcript12090_g3::g.6650::m.6650	1-609[+]	gi|164498902|gb|AC216413.1|	1144	E:0	Populus trichocarpa clone POP035-J17, complete sequence	gi|743886935|ref|XP_011037985.1|	183	E:1e-49	PREDICTED: uncharacterized protein LOC105135011 [Populus euphratica]	.	.	.	.	.	.	.	.	.	.	.	.	.	.	.	.	.	.	.
f2p60_841_319864	-1.991	1.54661e-156	down	yes	-0.514196	1.19698e-19	down	no	0.147877	0.0221221	up	no	0.178954	NA	up	no	0.413664	0.00767317	up	no	Gene.15613::PuPacbio_f2p60_841_transcript31986_g14::g.15613::m.15613	38-565[+]	gi|566205672|ref|XM_002322020.2|	1419	E:0	Populus trichocarpa hypothetical protein (POPTR_0015s03670g) mRNA, complete cds	gi|566205673|ref|XP_002322056.2|	291	E:2e-96	hypothetical protein POPTR_0015s03670g [Populus trichocarpa]	.	.	.	.	.	.	.	.	.	.	.	.	.	.	.	.	.	.	.
f2p60_840_12638	-1.05292	2.08277e-11	down	yes	-0.682089	1.17541e-06	down	no	0.325632	0.0150621	up	no	0.553093	5.94287e-05	up	no	0.681947	2.66139e-06	up	no	Gene.6833::PuPacbio_f2p60_840_transcript12638_g2::g.6833::m.6833	2-559[+]	gi|566191229|ref|XM_002314977.2|	1345	E:0	Populus trichocarpa hypothetical protein (POPTR_0010s16880g) mRNA, complete cds	gi|224108914|ref|XP_002315013.1|	330	E:8e-112	hypothetical protein POPTR_0010s16880g [Populus trichocarpa]	.	.	.	.	.	.	.	.	.	.	.	.	.	.	.	.	.	.	.
f2p60_835_320711	-2.10841	1.34204e-05	down	yes	-0.633996	0.103276	down	no	-1.98776	2.37001e-07	down	yes	-1.47018	1.02665e-05	down	yes	-1.37524	3.52187e-05	down	yes	Gene.15645::PuPacbio_f2p60_835_transcript32071_g11::g.15645::m.15645	1-345[+]	.	.	.	.	.	.	.	.	.	.	.	.	.	.	.	.	.	.	.	.	.	.	.	.	.	.	.
f2p60_813_12908	-1.50115	1.64624e-56	down	yes	-0.758674	6.06016e-22	down	no	-0.619053	3.92392e-12	down	no	-1.24651	6.18525e-15	down	yes	-0.987424	2.04787e-23	down	no	Gene.6921::PuPacbio_f2p60_813_transcript12908_g3::g.6921::m.6921	55-477[+]	gi|566156057|ref|XM_006386149.1|	1314	E:0	Populus trichocarpa hypothetical protein (POPTR_0002s03590g) mRNA, complete cds	gi|566156058|ref|XP_006386211.1|	255	E:6e-83	hypothetical protein POPTR_0002s03590g [Populus trichocarpa]	.	.	.	.	.	.	.	.	.	.	.	.	.	.	.	.	.	.	.
f2p60_807_32403	2.15118	7.43184e-06	up	yes	2.70331	3.26489e-10	up	yes	1.40069	0.000290409	up	yes	1.86343	1.76596e-08	up	yes	0.818919	0.0131823	up	no	Gene.15776::PuPacbio_f2p60_807_transcript32403_g5::g.15776::m.15776	69-368[+]	gi|566153697|ref|XM_006370042.1|	1325	E:0	Populus trichocarpa hypothetical protein (POPTR_0001s39530g) mRNA, complete cds	gi|566153698|ref|XP_006370104.1|	129	E:2e-34	hypothetical protein POPTR_0001s39530g [Populus trichocarpa]	.	.	.	.	.	.	.	.	.	.	.	.	.	.	.	.	.	.	.
f2p60_786_13192	0.823459	5.97555e-08	up	no	0.879735	3.2485e-10	up	no	1.05525	2.37854e-13	up	yes	1.55543	4.76849e-14	up	yes	1.59464	2.01198e-25	up	yes	Gene.7003::PuPacbio_f2p60_786_transcript13192_g4::g.7003::m.7003	107-607[+]	gi|566197925|ref|XM_006376875.1|	1282	E:0	Populus trichocarpa hypothetical protein (POPTR_0012s11280g) mRNA, complete cds	gi|566197926|ref|XP_006376937.1|	327	E:4e-111	hypothetical protein POPTR_0012s11280g [Populus trichocarpa]	.	.	.	.	.	.	.	.	.	.	.	.	.	.	ExpAA=20.26^PredHel=1^Topology=i58-77o	.	.	.	.
f2p60_763_13381	0.271641	0.594618	up	no	1.28328	0.0170488	up	yes	2.61534	6.24068e-12	up	yes	0.79675	0.00905812	up	no	0.453254	0.0954625	up	no	.	.	gi|743864590|ref|XM_011033656.1|	658	E:0	PREDICTED: Populus euphratica vegetative cell wall protein gp1 (LOC105130928), mRNA	gi|566161489|ref|XP_006385552.1|	55.5	E:7e-07	hypothetical protein POPTR_0003s08030g [Populus trichocarpa]	.	.	.	.	.	.	.	.	.	.	.	.	.	.	.	.	.	.	.
f2p60_752_33216	-0.192605	0.428234	down	no	0.144253	0.536123	up	no	1.11522	2.026e-08	up	yes	-0.416067	0.0820356	down	no	-0.816986	0.00123442	down	no	Gene.16054::PuPacbio_f2p60_752_transcript33216_g8::g.16054::m.16054	1-486[+]	gi|566178443|ref|XM_002308650.2|	1194	E:0	Populus trichocarpa hypothetical protein (POPTR_0006s27540g) mRNA, complete cds	gi|224089312|ref|XP_002308686.1|	199	E:3e-61	hypothetical protein POPTR_0006s27540g [Populus trichocarpa]	.	.	.	.	.	.	.	.	.	.	.	.	.	.	.	.	.	.	.
f2p60_750_13363	-1.42596	1.64307e-10	down	yes	-1.52003	1.04164e-11	down	yes	-0.952424	8.41572e-07	down	no	-0.978313	7.98705e-05	down	no	-1.34601	5.03809e-10	down	yes	Gene.7057::PuPacbio_f2p60_750_transcript13363_g1::g.7057::m.7057	30-503[+]	gi|566201412|ref|XM_002319369.2|	1245	E:0	Populus trichocarpa hypothetical protein (POPTR_0013s15020g) mRNA, complete cds	gi|224124720|ref|XP_002319405.1|	273	E:3e-90	hypothetical protein POPTR_0013s15020g [Populus trichocarpa]	.	.	.	.	SCRM2_ARATH	52.4	E:3e-07	RecName: Full=Transcription factor SCREAM2;^Eukaryota; Viridiplantae; Streptophyta; Embryophyta; Tracheophyta; Spermatophyta; Magnoliophyta; eudicotyledons; Gunneridae; Pentapetalae; rosids; malvids; Brassicales; Brassicaceae; Camelineae; Arabidopsis	.	.	.	ENOG4111GT2	inducer of cbf expression	.	.	.	GO:0010444|guard mother cell differentiation;GO:0006355|regulation of transcription, DNA-templated;GO:0050826|response to freezing;GO:0006351|transcription, DNA-templated	GO:0003677|DNA binding;GO:0046983|protein dimerization activity;GO:0003700|transcription factor activity, sequence-specific DNA binding	GO:0005634|nucleus
f2p60_719_335601	-0.199647	0.490619	down	no	-0.538701	0.0568932	down	no	1.67538	2.72592e-16	up	yes	1.81424	1.71146e-18	up	yes	1.69481	2.76431e-13	up	yes	Gene.16146::PuPacbio_f2p60_719_transcript33560_g11::g.16146::m.16146	22-543[+]	gi|566236004|ref|XM_002325881.2|	1256	E:0	Populus trichocarpa hypothetical protein (POPTR_0019s08420g) mRNA, complete cds	gi|224146196|ref|XP_002325917.1|	360	E:3e-124	hypothetical protein POPTR_0019s08420g [Populus trichocarpa]	.	.	.	.	.	.	.	.	PF05349.11	GATA-N	GATA-type transcription activator, N-terminal	.	.	.	.	.	GO:0045893|positive regulation of transcription, DNA-templated	GO:0003677|DNA binding;GO:0008270|zinc ion binding	GO:0005634|nucleus
f2p60_706_337502	-1.82284	1.60982e-36	down	yes	-1.45549	1.20442e-29	down	yes	-0.0926669	0.399516	down	no	0.00697593	0.952328	up	no	0.274011	0.0235508	up	no	Gene.16196::PuPacbio_f2p60_706_transcript33750_g12::g.16196::m.16196	3-509[+]	gi|743867936|ref|XM_011034566.1|	1005	E:0	PREDICTED: Populus euphratica uncharacterized LOC105131544 (LOC105131544), transcript variant X1, mRNA	gi|224100603|ref|XP_002311942.1|	231	E:4e-74	hypothetical protein POPTR_0008s02080g [Populus trichocarpa]	.	.	.	.	.	.	.	.	.	.	.	.	.	.	ExpAA=41.00^PredHel=2^Topology=i21-40o144-166i	.	.	.	.
f2p60_681_34093	1.26931	1.41572e-51	up	yes	1.00592	1.02859e-35	up	yes	0.896482	5.54918e-20	up	no	0.617682	8.74602e-10	up	no	0.764522	7.81257e-15	up	no	.	.	gi|566211032|ref|XM_006372528.1|	1022	E:0	Populus trichocarpa hypothetical protein (POPTR_0017s03020g) mRNA, complete cds	gi|566211033|ref|XP_006372590.1|	151	E:8e-44	hypothetical protein POPTR_0017s03020g [Populus trichocarpa]	.	.	.	.	.	.	.	.	.	.	.	.	.	.	.	.	.	.	.
f2p60_675_34179	2.07826	2.53651e-28	up	yes	-0.0655843	0.796312	down	no	0.0105619	0.965929	up	no	-0.047178	0.849712	down	no	0.625174	0.00422898	up	no	Gene.16304::PuPacbio_f2p60_675_transcript34179_g6::g.16304::m.16304	3-377[+]	gi|566158553|ref|XM_002302617.2|	1142	E:0	Populus trichocarpa hypothetical protein (POPTR_0002s17590g) mRNA, complete cds	gi|224068030|ref|XP_002302653.1|	214	E:1e-63	hypothetical protein POPTR_0002s17590g [Populus trichocarpa]	.	.	.	.	.	.	.	.	.	.	.	.	.	.	.	.	.	.	.
f2p60_672_14156	-0.409439	0.373759	down	no	1.06761	0.00244261	up	yes	0.823475	0.013426	up	no	1.3502	1.71553e-06	up	yes	1.26086	3.04235e-05	up	yes	Gene.7279::PuPacbio_f2p60_672_transcript14156_g1::g.7279::m.7279	89-496[+]	gi|566151763|ref|XM_002300242.2|	1166	E:0	Populus trichocarpa hypothetical protein (POPTR_0001s29940g) mRNA, complete cds	gi|224060851|ref|XP_002300278.1|	226	E:3e-72	hypothetical protein POPTR_0001s29940g [Populus trichocarpa]	.	.	.	.	.	.	.	.	PF05479.10	PsaN	Photosystem I reaction centre subunit N (PSAN or PSI-N)	.	.	.	.	.	GO:0015979|photosynthesis	.	GO:0009522|photosystem I
f2p60_670_342840	1.18488	0.0151298	up	yes	1.66067	0.000194785	up	yes	2.77065	4.46053e-17	up	yes	1.0133	0.00237504	up	yes	-0.108732	0.713149	down	no	.	.	gi|224081348|ref|XM_002306343.1|	974	E:0	Populus trichocarpa hypothetical protein (POPTR_0005s09460g) mRNA, complete cds	gi|224081349|ref|XP_002306379.1|	216	E:1e-68	hypothetical protein POPTR_0005s09460g [Populus trichocarpa]	.	.	.	.	.	.	.	.	.	.	.	.	.	.	.	.	.	.	.
f2p60_662_14537	1.26425	0.00568894	up	yes	2.05934	1.01076e-07	up	yes	1.01697	0.00610836	up	yes	0.977729	0.00336806	up	no	0.69592	0.0346498	up	no	Gene.7378::PuPacbio_f2p60_662_transcript14537_g5::g.7378::m.7378	55-408[+]	gi|566259264|ref|XM_006389131.1|	1070	E:0	Populus trichocarpa hypothetical protein (POPTR_0036s00230g) mRNA, complete cds	gi|566259265|ref|XP_006389193.1|	186	E:7e-57	hypothetical protein POPTR_0036s00230g [Populus trichocarpa]	.	.	.	.	.	.	.	.	.	.	.	.	.	.	.	.	.	.	.
f2p60_659_14340	-1.34533	8.73098e-05	down	yes	0.473775	0.0738179	up	no	0.325056	0.22317	up	no	0.261668	0.424224	up	no	0.455183	0.169839	up	no	Gene.7322::PuPacbio_f2p60_659_transcript14340_g1::g.7322::m.7322	29-385[+]	gi|566204619|ref|XM_002320485.2|	970	E:0	Populus trichocarpa hypothetical protein (POPTR_0014s16530g) mRNA, complete cds	gi|224129182|ref|XP_002320521.1|	195	E:2e-60	hypothetical protein POPTR_0014s16530g [Populus trichocarpa]	.	.	.	.	.	.	.	.	.	.	.	.	.	.	ExpAA=22.71^PredHel=1^Topology=o91-113i	.	.	.	.
f2p60_640_34676	0.972824	6.00695e-13	up	no	1.20466	3.78672e-22	up	yes	0.27008	0.0896317	up	no	-0.476761	0.13431	down	no	-2.16044	5.01549e-22	down	yes	.	.	gi|566255395|ref|XM_006387726.1|	857	E:0	Populus trichocarpa hypothetical protein (POPTR_0580s00210g) mRNA, complete cds	gi|566255396|ref|XP_006387788.1|	147	E:2e-42	hypothetical protein POPTR_0580s00210g [Populus trichocarpa]	.	.	.	.	.	.	.	.	.	.	.	.	.	.	.	.	.	.	.
f2p60_628_14757	0.877845	1.7702e-12	up	no	0.866222	3.16985e-13	up	no	1.40941	2.1966e-29	up	yes	1.56722	5.28729e-43	up	yes	2.0966	6.69918e-39	up	yes	Gene.7414::PuPacbio_f2p60_628_transcript14757_g6::g.7414::m.7414	1-414[+]	gi|566197984|ref|XM_006376899.1|	909	E:0	Populus trichocarpa glycine-rich family protein (POPTR_0012s11590g) mRNA, complete cds	gi|566197985|ref|XP_006376961.1|	58.9	E:1e-08	glycine-rich family protein [Populus trichocarpa]	.	.	.	.	.	.	.	.	.	.	.	.	.	.	.	.	.	.	.
f2p60_622_35029	0.60583	0.246224	up	no	1.1617	1.96604e-06	up	yes	0.345478	0.2823	up	no	-0.00618691	0.982799	down	no	-0.315437	0.338572	down	no	.	.	gi|566155891|ref|XM_002301954.2|	1005	E:0	Populus trichocarpa hypothetical protein (POPTR_0002s02650g) mRNA, complete cds	gi|224065968|ref|XP_002301990.1|	107	E:2e-27	hypothetical protein POPTR_0002s02650g [Populus trichocarpa]	.	.	.	.	.	.	.	.	.	.	.	.	.	.	.	.	.	.	.
f2p60_619_34924	2.57732	1.3938e-07	up	yes	2.61314	2.07995e-08	up	yes	3.07535	3.2105e-18	up	yes	2.2566	8.56063e-12	up	yes	2.60223	2.48487e-16	up	yes	Gene.16464::PuPacbio_f2p60_619_transcript34924_g4::g.16464::m.16464	3-467[+]	gi|566193676|ref|XM_002317198.2|	1009	E:0	Populus trichocarpa glycine-rich family protein (POPTR_0011s04480g) mRNA, complete cds	gi|224116186|ref|XP_002317234.1|	105	E:9e-26	glycine-rich family protein [Populus trichocarpa]	.	.	.	.	.	.	.	.	.	.	.	.	.	.	ExpAA=18.08^PredHel=1^Topology=o15-32i	.	.	.	.
f2p60_610_15056	-1.25621	2.71941e-31	down	yes	-1.12779	1.87033e-30	down	yes	-0.978021	8.17461e-17	down	no	-0.370034	0.00289401	down	no	-0.882804	1.66051e-09	down	no	.	.	gi|224130485|ref|XM_002320813.1|	422	E:9e-115	Populus trichocarpa hypothetical protein (POPTR_0014s09080g) mRNA, complete cds	gi|224130486|ref|XP_002320849.1|	164	E:3e-49	hypothetical protein POPTR_0014s09080g [Populus trichocarpa]	.	.	.	.	.	.	.	.	.	.	.	.	.	.	.	.	.	.	.
f2p60_599_14966	0.218499	0.687478	up	no	2.36943	3.45525e-09	up	yes	2.09719	1.59393e-09	up	yes	-0.141164	0.663349	down	no	-0.0408865	0.894931	down	no	.	.	gi|566197645|ref|XM_006376828.1|	955	E:0	Populus trichocarpa hypothetical protein (POPTR_0012s09560g) mRNA, complete cds	gi|566197646|ref|XP_006376890.1|	111	E:1e-28	hypothetical protein POPTR_0012s09560g [Populus trichocarpa]	.	.	.	.	.	.	.	.	.	.	.	.	.	.	.	.	.	.	.
f2p60_559_358352	-0.247624	0.411785	down	no	0.223428	0.451846	up	no	1.07197	3.08152e-06	up	yes	1.49128	1.30897e-11	up	yes	1.00343	0.00113673	up	yes	Gene.16576::PuPacbio_f2p60_559_transcript35835_g12::g.16576::m.16576	3-335[+]	gi|566150970|ref|XM_002298285.2|	784	E:0	Populus trichocarpa hypothetical protein (POPTR_0001s25670g) mRNA, complete cds	gi|224054560|ref|XP_002298321.1|	149	E:3e-43	hypothetical protein POPTR_0001s25670g [Populus trichocarpa]	.	.	.	.	.	.	.	.	PF11493.7	TSP9	Thylakoid soluble phosphoprotein TSP9	.	.	.	.	.	.	.	.
f2p60_556_15451	-1.06568	0.00129472	down	yes	-0.449922	0.13111	down	no	-0.633538	0.0355338	down	no	-0.481923	0.0728833	down	no	-0.488122	0.0603035	down	no	Gene.7504::PuPacbio_f2p60_556_transcript15451_g5::g.7504::m.7504	3-353[+]	gi|566187072|ref|XM_002313881.2|	931	E:0	Populus trichocarpa hypothetical protein (POPTR_0009s08970g) mRNA, complete cds	gi|566187073|ref|XP_002313917.2|	177	E:3e-54	hypothetical protein POPTR_0009s08970g [Populus trichocarpa]	.	.	.	.	.	.	.	.	.	.	.	.	.	.	.	.	.	.	.
f2p60_552_35873	-0.36982	0.236076	down	no	-1.40605	2.93804e-05	down	yes	-0.34176	0.211236	down	no	0.266104	0.293238	up	no	-0.158095	0.565931	down	no	.	.	gi|566208817|ref|XM_006373712.1|	763	E:0	Populus trichocarpa hypothetical protein (POPTR_0016s05280g) mRNA, complete cds	.	.	.	.	.	.	.	.	.	.	.	.	.	.	.	.	.	.	.	.	.	.	.
f2p60_549_359392	-1.09422	1.86176e-11	down	yes	0.682386	1.45908e-08	up	no	0.608059	0.000189125	up	no	1.09404	2.16816e-16	up	yes	0.996857	3.77795e-09	up	no	Gene.16583::PuPacbio_f2p60_549_transcript35939_g12::g.16583::m.16583	1-333[+]	gi|566150970|ref|XM_002298285.2|	898	E:0	Populus trichocarpa hypothetical protein (POPTR_0001s25670g) mRNA, complete cds	gi|224054560|ref|XP_002298321.1|	149	E:2e-43	hypothetical protein POPTR_0001s25670g [Populus trichocarpa]	.	.	.	.	.	.	.	.	PF11493.7	TSP9	Thylakoid soluble phosphoprotein TSP9	.	.	.	.	.	.	.	.
f2p60_547_359866	-1.69244	1.35615e-63	down	yes	-1.21625	4.05725e-35	down	yes	-0.829136	4.21111e-15	down	no	-1.14814	2.59805e-08	down	yes	-0.555226	0.0708899	down	no	.	.	gi|118482601|gb|EF145024.1|	821	E:0	Populus trichocarpa clone WS0111_J16 unknown mRNA	gi|566255262|ref|XP_006387741.1|	108	E:7e-28	hypothetical protein POPTR_0626s00200g [Populus trichocarpa]	.	.	.	.	.	.	.	.	.	.	.	.	.	.	.	.	.	.	.
f2p60_542_15668	-1.16139	5.47672e-08	down	yes	-0.506066	0.00284978	down	no	-0.797505	0.00010556	down	no	-0.764625	3.48674e-05	down	no	-0.369428	0.137469	down	no	.	.	gi|566187395|ref|XM_006379150.1|	826	E:0	Populus trichocarpa hypothetical protein (POPTR_0009s11030g) mRNA, complete cds	gi|566187396|ref|XP_006379212.1|	76.6	E:1e-15	hypothetical protein POPTR_0009s11030g [Populus trichocarpa]	.	.	.	.	.	.	.	.	.	.	.	.	.	.	.	.	.	.	.
f2p60_500_15786	0.766141	0.00153743	up	no	0.644523	0.00596096	up	no	1.01206	6.53695e-06	up	yes	1.05588	2.26572e-06	up	yes	1.02937	9.5943e-07	up	yes	Gene.7533::PuPacbio_f2p60_500_transcript15786_g1::g.7533::m.7533	1-300[+]	gi|158854074|gb|AC213494.1|	802	E:0	Populus trichocarpa clone POP025-N11, complete sequence	gi|566259269|ref|XP_006389195.1|	123	E:1e-33	hypothetical protein POPTR_0036s00250g [Populus trichocarpa]	.	.	.	.	.	.	.	.	.	.	.	.	.	.	.	.	.	.	.
f2p60_495_36555	-1.20019	0.000754798	down	yes	-0.801373	0.0251327	down	no	-0.809631	3.2124e-05	down	no	-0.454721	0.0461274	down	no	-0.229176	0.27012	down	no	.	.	gi|566187395|ref|XM_006379150.1|	695	E:0	Populus trichocarpa hypothetical protein (POPTR_0009s11030g) mRNA, complete cds	gi|223538870|gb|EEF40468.1|	73.9	E:8e-15	conserved hypothetical protein [Ricinus communis]	.	.	.	.	.	.	.	.	.	.	.	.	.	.	.	.	.	.	.
f2p60_491_15892	1.91814	1.64076e-07	up	yes	2.11697	3.00869e-10	up	yes	1.42734	1.66591e-05	up	yes	1.29334	3.18207e-05	up	yes	1.6564	2.87146e-08	up	yes	.	.	gi|158854074|gb|AC213494.1|	665	E:0	Populus trichocarpa clone POP025-N11, complete sequence	gi|566259257|ref|XP_006389189.1|	147	E:5e-43	hypothetical protein POPTR_0036s00200g [Populus trichocarpa]	.	.	.	.	.	.	.	.	.	.	.	.	.	.	.	.	.	.	.
f2p60_490_16064	-1.5283	1.40696e-05	down	yes	-0.663536	0.0123119	down	no	-0.134486	NA	down	no	0.0296639	0.897541	up	no	0.270664	0.21343	up	no	.	.	gi|566205672|ref|XM_002322020.2|	737	E:0	Populus trichocarpa hypothetical protein (POPTR_0015s03670g) mRNA, complete cds	.	.	.	.	.	.	.	.	.	.	.	.	.	.	.	.	.	.	.	.	.	.	.
f2p60_463_36930	-1.43575	1.86303e-10	down	yes	-1.69694	1.50343e-14	down	yes	-1.16082	4.97304e-08	down	yes	-1.08054	8.63913e-08	down	yes	-0.596428	0.00575375	down	no	.	.	gi|566152915|ref|XM_002300017.2|	741	E:0	Populus trichocarpa hypothetical protein (POPTR_0001s35310g) mRNA, complete cds	gi|566190977|ref|XP_006378538.1|	66.2	E:3e-11	hypothetical protein POPTR_0010s15490g [Populus trichocarpa]	.	.	.	.	.	.	.	.	.	.	.	.	.	.	.	.	.	.	.
f2p60_457_36964	-1.2842	3.6817e-19	down	yes	-1.01408	6.40726e-18	down	yes	-0.583365	2.96052e-12	down	no	0.127394	0.281879	up	no	0.324024	0.000961656	up	no	.	.	gi|118487071|gb|EF147349.1|	743	E:0	Populus trichocarpa clone WS0122_N18 unknown mRNA	gi|566215469|ref|XP_006372139.1|	51.6	E:7e-07	hypothetical protein POPTR_0018s12270g [Populus trichocarpa]	.	.	.	.	.	.	.	.	.	.	.	.	.	.	.	.	.	.	.
f2p60_452_37117	-1.21238	0.000496605	down	yes	-0.72099	0.0223107	down	no	-0.147246	0.600768	down	no	-0.045578	0.862987	down	no	0.248364	0.307884	up	no	.	.	gi|566184223|ref|XM_002312524.2|	645	E:0	Populus trichocarpa hypothetical protein (POPTR_0008s15930g) mRNA, complete cds	gi|566184224|ref|XP_002312560.2|	88.2	E:5e-18	hypothetical protein POPTR_0008s15930g [Populus trichocarpa]	.	.	.	.	.	.	.	.	.	.	.	.	.	.	.	.	.	.	.
f2p60_441_371874	-0.587876	0.0329355	down	no	-1.00516	0.000209792	down	yes	-1.44979	4.31458e-07	down	yes	-0.711448	0.0252728	down	no	-1.14609	0.000115903	down	yes	.	.	gi|566192775|ref|XM_006378794.1|	736	E:0	Populus trichocarpa hypothetical protein (POPTR_0010s25750g) mRNA, complete cds	gi|566192776|ref|XP_006378856.1|	113	E:3e-30	hypothetical protein POPTR_0010s25750g [Populus trichocarpa]	.	.	.	.	.	.	.	.	.	.	.	.	.	.	.	.	.	.	.
f2p60_406_16561	-0.678657	0.219439	down	no	-1.16267	0.0290596	down	yes	-0.321307	0.413457	down	no	-0.418482	0.20738	down	no	-0.378975	0.244368	down	no	.	.	gi|118481746|gb|EF144577.1|	577	E:1e-161	Populus trichocarpa clone WS01111_D24 unknown mRNA	gi|566201193|ref|XP_002319899.2|	70.9	E:3e-14	hypothetical protein POPTR_0013s13680g [Populus trichocarpa]	.	.	.	.	.	.	.	.	.	.	.	.	.	.	.	.	.	.	.
f2p60_374_37864	-1.18345	0.00755164	down	yes	-0.443688	0.237703	down	no	-0.38166	0.260884	down	no	-0.0783447	0.798349	down	no	-0.0992382	0.746128	down	no	.	.	gi|118489944|gb|EF148817.1|	558	E:4e-156	Populus trichocarpa x Populus deltoides clone WS0138_K02 unknown mRNA	gi|224089815|ref|XP_002308821.1|	81.6	E:3e-18	hypothetical protein POPTR_0006s02190g [Populus trichocarpa]	.	.	.	.	.	.	.	.	.	.	.	.	.	.	.	.	.	.	.
f2p60_320_38476	1.11106	0.00513847	up	yes	0.928689	0.0176244	up	no	0.487794	0.178258	up	no	0.354044	0.288503	up	no	0.144722	0.661645	up	no	.	.	gi|743909354|ref|XR_845534.1|	401	E:6e-109	PREDICTED: Populus euphratica uncharacterized LOC105142291 (LOC105142291), ncRNA	.	.	.	.	.	.	.	.	.	.	.	.	.	.	.	.	.	.	.	.	.	.	.
f2p60_2694_2321	0.669163	0.00294134	up	no	1.58822	1.57609e-18	up	yes	0.757604	0.000879373	up	no	0.56092	0.00831572	up	no	0.042946	0.84407	up	no	.	.	gi|938485524|gb|KT429213.1|	4885	E:0	Populus tremula x Populus alba mitochondrion, complete genome	.	.	.	.	.	.	.	.	.	.	.	.	.	.	.	.	.	.	.	.	.	.	.
f2p60_2561_20221	0.688633	0.0150128	up	no	1.60139	2.88977e-11	up	yes	0.404337	0.135662	up	no	0.327434	0.199435	up	no	-0.254291	0.395198	down	no	.	.	gi|938485524|gb|KT429213.1|	2632	E:0	Populus tremula x Populus alba mitochondrion, complete genome	gi|953820802|gb|ALP00640.1|	142	E:7e-45	hypothetical protein (mitochondrion) [Populus tremula]	.	.	.	.	.	.	.	.	.	.	.	.	.	.	.	.	.	.	.
f2p60_2186_21304	1.92432	2.11833e-172	up	yes	1.49995	6.1111e-122	up	yes	0.955526	2.07045e-06	up	no	-0.723528	2.22319e-24	down	no	-1.24547	1.39723e-25	down	yes	Gene.10382::PuPacbio_f2p60_2186_transcript21304_g2::g.10382::m.10382	2-1840[+]	gi|164498902|gb|AC216413.1|	2460	E:0	Populus trichocarpa clone POP035-J17, complete sequence	gi|743886935|ref|XP_011037985.1|	108	E:1e-21	PREDICTED: uncharacterized protein LOC105135011 [Populus euphratica]	.	.	.	.	MUC1_HUMAN	77.4	E:2e-13	RecName: Full=Mucin-1;^Eukaryota; Metazoa; Chordata; Craniata; Vertebrata; Euteleostomi; Mammalia; Eutheria; Euarchontoglires; Primates; Haplorrhini; Catarrhini; Hominidae; Homo	.	.	.	ENOG410ZQ7Z	Mucin 1, cell surface associated	.	ExpAA=20.24^PredHel=1^Topology=i21-43o	.	GO:0006977|DNA damage response, signal transduction by p53 class mediator resulting in cell cycle arrest;GO:0006978|DNA damage response, signal transduction by p53 class mediator resulting in transcription of p21 class mediator;GO:0033629|negative regulation of cell adhesion mediated by integrin;GO:1902166|negative regulation of intrinsic apoptotic signaling pathway in response to DNA damage by p…	GO:0002039|p53 binding;GO:0000978|RNA polymerase II core promoter proximal region sequence-specific DNA binding;GO:0003712|transcription cofactor activity	GO:0016324|apical plasma membrane;GO:0070062|extracellular exosome;GO:0005615|extracellular space;GO:0005796|Golgi lumen;GO:0005887|integral component of plasma membrane;GO:0000790|nuclear chromatin;GO:0005886|plasma membrane;GO:0031982|vesicle
f2p60_2158_3700	-1.33601	9.2656e-87	down	yes	-0.729576	4.89461e-32	down	no	-0.491466	5.36113e-12	down	no	0.13357	0.0709514	up	no	0.368234	NA	up	no	Gene.2819::PuPacbio_f2p60_2158_transcript3700_g1::g.2819::m.2819	106-1824[+]	gi|566184223|ref|XM_002312524.2|	3677	E:0	Populus trichocarpa hypothetical protein (POPTR_0008s15930g) mRNA, complete cds	gi|566184224|ref|XP_002312560.2|	931	E:0	hypothetical protein POPTR_0008s15930g [Populus trichocarpa]	.	.	.	.	.	.	.	.	.	.	.	.	.	.	.	.	.	.	.
f2p60_2130_3859	-1.22082	1.59947e-34	down	yes	-1.24279	3.05194e-48	down	yes	-1.52201	9.05318e-45	down	yes	-1.48485	2.23202e-50	down	yes	-1.29133	6.09955e-15	down	yes	.	.	gi|156447061|gb|AC208994.1|	736	E:0	Populus trichocarpa clone JGIACSB1089-D20, complete sequence	.	.	.	.	.	.	.	.	.	.	.	.	.	.	.	.	.	.	.	.	.	.	.
f2p60_1487_25289	1.01141	1.84562e-08	up	yes	0.79603	1.21291e-05	up	no	0.0680991	0.757461	up	no	0.0933052	0.668527	up	no	0.275126	0.170055	up	no	Gene.12739::PuPacbio_f2p60_1487_transcript25289_g6::g.12739::m.12739	70-1155[+]	gi|566202330|ref|XM_006374977.1|	2625	E:0	Populus trichocarpa hypothetical protein (POPTR_0014s03830g) mRNA, complete cds	gi|566202331|ref|XP_006375039.1|	678	E:0	hypothetical protein POPTR_0014s03830g [Populus trichocarpa]	.	.	.	.	.	.	.	.	.	.	.	.	.	.	ExpAA=114.93^PredHel=6^Topology=i141-163o173-195i216-238o242-264i277-296o330-352i	.	.	.	.
f2p60_1401_25969	-0.752052	2.81103e-14	down	no	-0.798486	3.78992e-15	down	no	-1.10017	1.0931e-20	down	yes	-0.811811	2.26149e-12	down	no	-0.81879	1.25016e-09	down	no	.	.	gi|743923693|ref|XM_011007646.1|	961	E:0	PREDICTED: Populus euphratica protein RADIALIS-like 4 (LOC105112076), mRNA	gi|566158809|ref|XP_006386690.1|	91.7	E:1e-19	hypothetical protein POPTR_0002s18910g [Populus trichocarpa]	.	.	.	.	.	.	.	.	.	.	.	.	.	.	.	.	.	.	.
f2p60_1386_26103	1.11825	9.00387e-18	up	yes	2.35309	5.23391e-115	up	yes	1.44879	2.15133e-26	up	yes	1.38023	NA	up	no	0.813635	1.40722e-06	up	no	Gene.13116::PuPacbio_f2p60_1386_transcript26103_g7::g.13116::m.13116	209-787[+]	gi|743784378|ref|XM_011023947.1|	2161	E:0	PREDICTED: Populus euphratica uncharacterized LOC105124081 (LOC105124081), mRNA	gi|743784379|ref|XP_011022249.1|	254	E:5e-120	PREDICTED: uncharacterized protein LOC105124081 [Populus euphratica]	.	.	.	.	.	.	.	.	.	.	.	.	.	.	ExpAA=20.47^PredHel=1^Topology=i42-61o	.	.	.	.
f2p60_1350_26412	-0.819394	2.70941e-13	down	no	-0.795601	4.06218e-12	down	no	-1.27835	2.14534e-23	down	yes	-0.795255	3.29358e-11	down	no	-0.844094	3.22934e-08	down	no	.	.	gi|743923693|ref|XM_011007646.1|	961	E:0	PREDICTED: Populus euphratica protein RADIALIS-like 4 (LOC105112076), mRNA	gi|566158809|ref|XP_006386690.1|	91.7	E:1e-19	hypothetical protein POPTR_0002s18910g [Populus trichocarpa]	.	.	.	.	.	.	.	.	.	.	.	.	.	.	.	.	.	.	.
f2p60_1346_26462	0.869616	1.21439e-09	up	no	1.03416	5.45029e-14	up	yes	1.09823	2.74573e-17	up	yes	0.576066	0.000139199	up	no	0.136409	0.421722	up	no	Gene.13282::PuPacbio_f2p60_1346_transcript26462_g3::g.13282::m.13282	96-668[+]	gi|566183526|ref|XM_002312358.2|	2331	E:0	Populus trichocarpa hypothetical protein (POPTR_0008s11850g) mRNA, complete cds	gi|224101719|ref|XP_002312394.1|	297	E:4e-96	hypothetical protein POPTR_0008s11850g [Populus trichocarpa]	.	.	.	.	.	.	.	.	.	.	.	.	.	.	.	.	.	.	.
f2p60_1302_8461	-1.46718	2.7327e-12	down	yes	-0.569731	2.09797e-07	down	no	-0.567411	0.0230756	down	no	-0.164074	0.286065	down	no	-0.0642263	0.617515	down	no	Gene.5215::PuPacbio_f2p60_1302_transcript8461_g1::g.5215::m.5215	1-1038[+]	gi|566179536|ref|XM_002309880.2|	2218	E:0	Populus trichocarpa hypothetical protein (POPTR_0007s04180g) mRNA, complete cds	gi|743827703|ref|XP_011023091.1|	584	E:0	PREDICTED: uncharacterized protein LOC105124685 [Populus euphratica]	.	.	.	.	.	.	.	.	.	.	.	.	.	.	ExpAA=142.84^PredHel=6^Topology=i41-63o112-134i155-177o192-223i244-266o276-298i	.	.	.	.
f2p60_1107_10152	1.14992	3.89081e-19	up	yes	0.573075	1.52879e-05	up	no	0.606493	8.83387e-06	up	no	0.627618	3.93815e-06	up	no	0.918143	1.63652e-12	up	no	Gene.5928::PuPacbio_f2p60_1107_transcript10152_g3::g.5928::m.5928	3-971[+]	gi|566148387|ref|XM_002297916.2|	1929	E:0	Populus trichocarpa hypothetical protein (POPTR_0001s11300g) mRNA, complete cds	gi|224053733|ref|XP_002297952.1|	634	E:0	hypothetical protein POPTR_0001s11300g [Populus trichocarpa]	.	.	.	.	.	.	.	.	.	.	.	.	.	.	ExpAA=85.96^PredHel=4^Topology=i186-208o212-234i246-268o288-310i	.	.	.	.
f2p60_1040_29559	-1.03507	1.18608e-08	down	yes	-0.676249	5.40052e-06	down	no	-0.170027	0.224215	down	no	-0.473098	0.00628521	down	no	-0.248868	0.14546	down	no	Gene.14645::PuPacbio_f2p60_1040_transcript29559_g4::g.14645::m.14645	470-955[+]	gi|743889864|ref|XM_011040577.1|	1605	E:0	PREDICTED: Populus euphratica uncharacterized LOC105135613 (LOC105135613), mRNA	gi|566153405|ref|XP_002298888.2|	310	E:6e-102	hypothetical protein POPTR_0001s38070g [Populus trichocarpa]	.	.	.	.	.	.	.	.	.	.	.	.	.	.	ExpAA=43.62^PredHel=2^Topology=i7-27o109-131i	.	.	.	.
f2p56_386_16535	0.843693	0.0801288	up	no	1.41288	0.000935885	up	yes	0.263283	0.501437	up	no	0.263182	0.433654	up	no	0.0230297	0.944663	up	no	.	.	gi|938485524|gb|KT429213.1|	636	E:2e-179	Populus tremula x Populus alba mitochondrion, complete genome	.	.	.	.	.	.	.	.	.	.	.	.	.	.	.	.	.	.	.	.	.	.	.
f2p55_333_38308	-1.29146	4.50108e-28	down	yes	-0.983922	2.87588e-30	down	no	0.026207	0.767586	up	no	0.064484	0.675687	up	no	-0.431482	0.000685686	down	no	.	.	gi|118488488|gb|EF148072.1|	531	E:8e-148	Populus trichocarpa clone WS0127_F04 unknown mRNA	gi|118488489|gb|ABK96058.1|	61.2	E:5e-10	unknown [Populus trichocarpa]	.	.	.	.	.	.	.	.	.	.	.	.	.	.	.	.	.	.	.
f2p45_3567_855	-0.776802	0.00324992	down	no	1.28488	5.36886e-13	up	yes	0.856934	5.64867e-06	up	no	1.69537	1.46552e-17	up	yes	1.66602	6.31648e-11	up	yes	Gene.876::PuPacbio_f2p45_3567_transcript855_g1::g.876::m.876	790-3435[+]	gi|743849679|ref|XM_011030232.1|	5999	E:0	PREDICTED: Populus euphratica uncharacterized LOC105128518 (LOC105128518), transcript variant X1, mRNA	gi|566206706|ref|XP_002322173.2|	1618	E:0	hypothetical protein POPTR_0015s09010g [Populus trichocarpa]	.	.	.	.	.	.	.	.	.	.	.	.	.	.	ExpAA=173.06^PredHel=7^Topology=o423-445i466-488o493-515i646-668o678-700i712-734o749-766i	.	.	.	.
f2p44_676_14160	0.843426	0.040592	up	no	1.48386	1.99738e-05	up	yes	1.37028	1.50675e-05	up	yes	1.76918	6.23753e-10	up	yes	1.61465	6.08127e-09	up	yes	.	.	gi|566214407|ref|XM_002324379.2|	601	E:1e-168	Populus trichocarpa hypothetical protein (POPTR_0018s05860g) mRNA, complete cds	gi|224142137|ref|XP_002324415.1|	144	E:4e-41	hypothetical protein POPTR_0018s05860g [Populus trichocarpa]	.	.	.	.	.	.	.	.	.	.	.	.	.	.	.	.	.	.	.
f2p40_744_33224	0.649219	2.78907e-21	up	no	1.17398	1.05882e-76	up	yes	0.883387	0.000255551	up	no	0.953375	6.91678e-12	up	no	-0.338943	0.00743173	down	no	.	.	gi|566151316|ref|XM_002299913.2|	366	E:6e-98	Populus trichocarpa hypothetical protein (POPTR_0001s27540g) mRNA, complete cds	gi|224059644|ref|XP_002299949.1|	99.4	E:1e-23	hypothetical protein POPTR_0001s27540g [Populus trichocarpa]	.	.	.	.	.	.	.	.	.	.	.	.	.	.	.	.	.	.	.
f2p40_642_14495	-1.45554	8.14491e-18	down	yes	-0.751281	2.77066e-08	down	no	-0.695053	0.00033091	down	no	-0.986623	7.97247e-12	down	no	-0.792376	6.40593e-08	down	no	.	.	gi|566187395|ref|XM_006379150.1|	760	E:0	Populus trichocarpa hypothetical protein (POPTR_0009s11030g) mRNA, complete cds	gi|223538870|gb|EEF40468.1|	73.9	E:2e-14	conserved hypothetical protein [Ricinus communis]	.	.	.	.	.	.	.	.	.	.	.	.	.	.	.	.	.	.	.
f2p38_506_36447	-0.635289	0.147575	down	no	-1.07238	0.025422	down	yes	-0.784792	0.0414899	down	no	-0.577078	0.0685664	down	no	-0.89758	0.00648702	down	no	.	.	gi|566192775|ref|XM_006378794.1|	857	E:0	Populus trichocarpa hypothetical protein (POPTR_0010s25750g) mRNA, complete cds	gi|566192776|ref|XP_006378856.1|	113	E:8e-30	hypothetical protein POPTR_0010s25750g [Populus trichocarpa]	.	.	.	.	.	.	.	.	.	.	.	.	.	.	.	.	.	.	.
f2p36_638_14617	-0.876871	0.0601655	down	no	1.00341	0.00258133	up	yes	0.634301	0.0491044	up	no	0.390772	0.191522	up	no	0.374387	0.212264	up	no	.	.	gi|743940560|ref|XR_840952.1|	987	E:0	PREDICTED: Populus euphratica uncharacterized LOC105118488 (LOC105118488), ncRNA	gi|566196485|ref|XP_006376668.1|	109	E:5e-28	hypothetical protein POPTR_0012s02840g [Populus trichocarpa]	.	.	.	.	.	.	.	.	.	.	.	.	.	.	.	.	.	.	.
f2p27_2006_4414	0.733146	0.000267999	up	no	1.70262	6.06639e-26	up	yes	0.70771	0.000377332	up	no	0.546965	0.00850697	up	no	0.115956	0.572822	up	no	.	.	gi|938485524|gb|KT429213.1|	1232	E:0	Populus tremula x Populus alba mitochondrion, complete genome	.	.	.	.	.	.	.	.	.	.	.	.	.	.	.	.	.	.	.	.	.	.	.
f2p23_673_14308	-1.11047	9.29586e-18	down	yes	-0.050389	0.619386	down	no	-0.123254	0.250755	down	no	0.062452	0.575956	up	no	0.113417	0.317414	up	no	.	.	gi|158420586|gb|AC212921.1|	1125	E:0	Populus trichocarpa clone POP003-O05, complete sequence	gi|566205028|ref|XP_002321289.2|	191	E:4e-59	hypothetical protein POPTR_0014s18830g [Populus trichocarpa]	.	.	.	.	.	.	.	.	.	.	.	.	.	.	.	.	.	.	.
f14p60_480_37061	-1.59316	3.09032e-44	down	yes	-0.809869	9.28896e-15	down	no	-0.0675571	0.499443	down	no	0.205129	0.0744053	up	no	0.317539	0.00596975	up	no	.	.	gi|743894074|ref|XM_011041983.1|	719	E:0	PREDICTED: Populus euphratica programmed cell death protein 4-like (LOC105136578), mRNA	gi|743894075|ref|XP_011040285.1|	88.6	E:2e-20	PREDICTED: programmed cell death protein 4-like [Populus euphratica]	.	.	.	.	.	.	.	.	.	.	.	.	.	.	.	.	.	.	.
f12p60_738_33252	0.370201	0.015541	up	no	1.16253	3.69114e-20	up	yes	0.732349	1.70706e-07	up	no	0.982954	8.57692e-13	up	no	1.19447	5.15211e-15	up	yes	Gene.16061::PuPacbio_f12p60_738_transcript33252_g1::g.16061::m.16061	2-568[+]	gi|566170850|ref|XM_006383054.1|	1199	E:0	Populus trichocarpa hypothetical protein (POPTR_0005s11710g) mRNA, complete cds	gi|566170851|ref|XP_006383116.1|	297	E:2e-99	hypothetical protein POPTR_0005s11710g [Populus trichocarpa]	.	.	.	.	.	.	.	.	.	.	.	.	.	.	ExpAA=21.33^PredHel=1^Topology=i147-166o	.	.	.	.
f12p60_228_39542	-1.24101	0.0185331	down	yes	-0.592262	0.207703	down	no	-0.829475	0.0341342	down	no	-0.595381	0.0705939	down	no	-0.350347	0.292004	down	no	.	.	.	.	.	.	.	.	.	.	.	.	.	.	.	.	.	.	.	.	.	.	.	.	.	.	.	.	.
f10p60_1971_22195	1.49936	2.16063e-102	up	yes	1.10999	1.30445e-64	up	yes	1.20268	4.34371e-10	up	yes	-0.396216	1.36797e-07	down	no	-1.3099	2.03996e-43	down	yes	Gene.10975::PuPacbio_f10p60_1971_transcript22195_g1::g.10975::m.10975	2-1594[+]	gi|164498902|gb|AC216413.1|	2252	E:0	Populus trichocarpa clone POP035-J17, complete sequence	gi|743886935|ref|XP_011037985.1|	226	E:3e-61	PREDICTED: uncharacterized protein LOC105135011 [Populus euphratica]	.	.	.	.	MUC1_HUMAN	74.7	E:1e-12	RecName: Full=Mucin-1;^Eukaryota; Metazoa; Chordata; Craniata; Vertebrata; Euteleostomi; Mammalia; Eutheria; Euarchontoglires; Primates; Haplorrhini; Catarrhini; Hominidae; Homo	.	.	.	ENOG410ZQ7Z	Mucin 1, cell surface associated	.	ExpAA=20.23^PredHel=1^Topology=i21-43o	.	GO:0006977|DNA damage response, signal transduction by p53 class mediator resulting in cell cycle arrest;GO:0006978|DNA damage response, signal transduction by p53 class mediator resulting in transcription of p21 class mediator;GO:0033629|negative regulation of cell adhesion mediated by integrin;GO:1902166|negative regulation of intrinsic apoptotic signaling pathway in response to DNA damage by p…	GO:0002039|p53 binding;GO:0000978|RNA polymerase II core promoter proximal region sequence-specific DNA binding;GO:0003712|transcription cofactor activity	GO:0016324|apical plasma membrane;GO:0070062|extracellular exosome;GO:0005615|extracellular space;GO:0005796|Golgi lumen;GO:0005887|integral component of plasma membrane;GO:0000790|nuclear chromatin;GO:0005886|plasma membrane;GO:0031982|vesicle
f3p60_804_32451	-1.42996	1.91822e-161	down	yes	-0.665916	4.36115e-48	down	no	-0.633097	1.91339e-20	down	no	-0.418558	1.52283e-05	down	no	-0.264615	0.0366775	down	no	Gene.15788::PuPacbio_f3p60_804_transcript32451_g3::g.15788::m.15788	1-402[+]	gi|118487489|gb|EF147559.1|	1212	E:0	Populus trichocarpa clone WS0123_H05 unknown mRNA	gi|118486841|gb|ABK95255.1|	207	E:1e-64	unknown [Populus trichocarpa]	12KD_FRAAN	129	E:2e-35	RecName: Full=Auxin-repressed 12.5 kDa protein;^Eukaryota; Viridiplantae; Streptophyta; Embryophyta; Tracheophyta; Spermatophyta; Magnoliophyta; eudicotyledons; Gunneridae; Pentapetalae; rosids; fabids; Rosales; Rosaceae; Rosoideae; Potentilleae; Fragariinae; Fragaria	DRM1_ARATH	134	E:4e-39	RecName: Full=Dormancy-associated protein 1 {ECO:0000303|Ref.1};^Eukaryota; Viridiplantae; Streptophyta; Embryophyta; Tracheophyta; Spermatophyta; Magnoliophyta; eudicotyledons; Gunneridae; Pentapetalae; rosids; malvids; Brassicales; Brassicaceae; Camelineae; Arabidopsis	PF05564.11	Auxin_repressed	Dormancy/auxin associated protein	ENOG410YV4V	Auxin-repressed 12.5 kDa	.	.	.	GO:0007275|multicellular organism development;GO:0009750|response to fructose;GO:0009749|response to glucose;GO:0009744|response to sucrose	.	.
f4p60_1131_9947	-1.13359	9.39707e-38	down	yes	-0.923953	3.16152e-30	down	no	-0.877803	8.34537e-11	down	no	-0.588863	2.15734e-11	down	no	-0.204004	0.0725735	down	no	Gene.5849::PuPacbio_f4p60_1131_transcript9947_g2::g.5849::m.5849	2-400[+]	gi|118489917|gb|EF148803.1|	1903	E:0	Populus trichocarpa x Populus deltoides clone WS0138_D01 unknown mRNA	gi|118486841|gb|ABK95255.1|	207	E:4e-63	unknown [Populus trichocarpa]	12KD_FRAAN	129	E:2e-34	RecName: Full=Auxin-repressed 12.5 kDa protein;^Eukaryota; Viridiplantae; Streptophyta; Embryophyta; Tracheophyta; Spermatophyta; Magnoliophyta; eudicotyledons; Gunneridae; Pentapetalae; rosids; fabids; Rosales; Rosaceae; Rosoideae; Potentilleae; Fragariinae; Fragaria	DRM1_ARATH	134	E:4e-39	RecName: Full=Dormancy-associated protein 1 {ECO:0000303|Ref.1};^Eukaryota; Viridiplantae; Streptophyta; Embryophyta; Tracheophyta; Spermatophyta; Magnoliophyta; eudicotyledons; Gunneridae; Pentapetalae; rosids; malvids; Brassicales; Brassicaceae; Camelineae; Arabidopsis	PF05564.11	Auxin_repressed	Dormancy/auxin associated protein	ENOG410YV4V	Auxin-repressed 12.5 kDa	.	.	.	GO:0007275|multicellular organism development;GO:0009750|response to fructose;GO:0009749|response to glucose;GO:0009744|response to sucrose	.	.
f12p60_1131_28726	0.474166	6.41388e-09	up	no	1.02358	3.62841e-42	up	yes	0.186382	0.0377947	up	no	0.0426354	0.636875	up	no	0.0825427	0.431273	up	no	Gene.14284::PuPacbio_f12p60_1131_transcript28726_g1::g.14284::m.14284	121-882[+]	gi|566157167|ref|XM_002302263.2|	1930	E:0	Populus trichocarpa 14-3-3-like protein GF14 omicron (POPTR_0002s09770g) mRNA, complete cds	gi|743802074|ref|XP_011016523.1|	518	E:0	PREDICTED: 14-3-3 protein 7 [Populus euphratica]	14337_SOLLC	455	E:1e-159	RecName: Full=14-3-3 protein 7;^Eukaryota; Viridiplantae; Streptophyta; Embryophyta; Tracheophyta; Spermatophyta; Magnoliophyta; eudicotyledons; Gunneridae; Pentapetalae; asterids; lamiids; Solanales; Solanaceae; Solanoideae; Solaneae; Solanum; Lycopersicon	14337_SOLLC	455	E:1e-161	RecName: Full=14-3-3 protein 7;^Eukaryota; Viridiplantae; Streptophyta; Embryophyta; Tracheophyta; Spermatophyta; Magnoliophyta; eudicotyledons; Gunneridae; Pentapetalae; asterids; lamiids; Solanales; Solanaceae; Solanoideae; Solaneae; Solanum; Lycopersicon	PF00244.19	41701	14-3-3 protein	COG5040	Tyrosine 3-monooxygenase tryptophan 5-monooxygenase activation protein	.	.	.	.	GO:0019904|protein domain specific binding	.
f3p60_670_34256	-1.94669	1.73761e-09	down	yes	-2.03969	9.24965e-11	down	yes	1.27894	2.40138e-11	up	yes	0.224991	0.357932	up	no	-0.0226782	0.930002	down	no	.	.	gi|566213742|ref|XM_002324833.2|	1101	E:0	Populus trichocarpa hypothetical protein (POPTR_0018s01890g) mRNA, complete cds	gi|566213743|ref|XP_002324869.2|	155	E:8e-45	hypothetical protein POPTR_0018s01890g [Populus trichocarpa]	14KD_DAUCA	78.6	E:7e-17	RecName: Full=14 kDa proline-rich protein DC2.15;^Eukaryota; Viridiplantae; Streptophyta; Embryophyta; Tracheophyta; Spermatophyta; Magnoliophyta; eudicotyledons; Gunneridae; Pentapetalae; asterids; campanulids; Apiales; Apiaceae; Apioideae; Scandiceae; Daucinae; Daucus; Daucus sect. Daucus	.	.	.	.	.	.	.	.	.	.	.	.	.	.	GO:0016021|integral component of membrane
f2p46_752_33126	0.793814	0.094282	up	no	0.182867	0.47467	up	no	2.40341	1.04147e-09	up	yes	0.166515	0.275509	up	no	#N/A	#N/A	#N/A	#N/A	.	.	gi|224092503|ref|XM_002309602.1|	1229	E:0	Populus trichocarpa hypothetical protein (POPTR_0006s27220g) mRNA, complete cds	gi|224092504|ref|XP_002309638.1|	157	E:3e-45	hypothetical protein POPTR_0006s27220g [Populus trichocarpa]	14KD_DAUCA	107	E:4e-27	RecName: Full=14 kDa proline-rich protein DC2.15;^Eukaryota; Viridiplantae; Streptophyta; Embryophyta; Tracheophyta; Spermatophyta; Magnoliophyta; eudicotyledons; Gunneridae; Pentapetalae; asterids; campanulids; Apiales; Apiaceae; Apioideae; Scandiceae; Daucinae; Daucus; Daucus sect. Daucus	.	.	.	.	.	.	.	.	.	.	.	.	.	.	GO:0016021|integral component of membrane
f2p60_1273_27139	1.16863	2.1254e-62	up	yes	0.762764	2.24446e-26	up	no	0.101927	0.240079	up	no	-0.310642	0.00080229	down	no	-0.163763	0.137794	down	no	.	.	gi|566212074|ref|XM_002323719.2|	2224	E:0	Populus trichocarpa hypothetical protein (POPTR_0017s07870g) mRNA, complete cds	gi|224140777|ref|XP_002323755.1|	551	E:0	hypothetical protein POPTR_0017s07870g [Populus trichocarpa]	2NPD_BACSU	94.4	E:3e-20	RecName: Full=Probable nitronate monooxygenase;^Bacteria; Firmicutes; Bacilli; Bacillales; Bacillaceae; Bacillus	.	.	.	.	.	.	.	COG2070	2-Nitropropane dioxygenase	.	.	.	.	GO:0018580|nitronate monooxygenase activity	.
f2p60_1350_8100	0.986552	3.81622e-72	up	no	1.06237	2.54105e-84	up	yes	0.539729	2.03094e-18	up	no	0.469321	7.74462e-08	up	no	-0.0118488	0.86819	down	no	Gene.5053::PuPacbio_f2p60_1350_transcript8100_g3::g.5053::m.5053	54-1175[+]	gi|566197810|ref|XM_002318726.2|	2298	E:0	Populus trichocarpa MATRIX METALLOproteinASE (POPTR_0012s10640g) mRNA, complete cds	gi|566197811|ref|XP_002318762.2|	671	E:0	MATRIX METALLOproteinASE [Populus trichocarpa]	3MMP_ARATH	395	E:1e-132	RecName: Full=Metalloendoproteinase 3-MMP {ECO:0000303|PubMed:10574937};^Eukaryota; Viridiplantae; Streptophyta; Embryophyta; Tracheophyta; Spermatophyta; Magnoliophyta; eudicotyledons; Gunneridae; Pentapetalae; rosids; malvids; Brassicales; Brassicaceae; Camelineae; Arabidopsis	3MMP_ARATH	415	E:1e-141	RecName: Full=Metalloendoproteinase 3-MMP {ECO:0000303|PubMed:10574937};^Eukaryota; Viridiplantae; Streptophyta; Embryophyta; Tracheophyta; Spermatophyta; Magnoliophyta; eudicotyledons; Gunneridae; Pentapetalae; rosids; malvids; Brassicales; Brassicaceae; Camelineae; Arabidopsis	PF01471.17	PG_binding_1	Putative peptidoglycan binding domain	ENOG410XQ5D	matrix metallopeptidase	.	ExpAA=23.46^PredHel=1^Topology=i7-29o	.	GO:0006508|proteolysis	GO:0004222|metalloendopeptidase activity;GO:0008270|zinc ion bindingGO:0004222|metalloendopeptidase activity;GO:0008270|zinc ion binding	GO:0031225|anchored component of membrane;GO:0031012|extracellular matrix;GO:0005886|plasma membraneGO:0031012|extracellular matrix
f2p60_2057_4103	1.54458	3.25122e-133	up	yes	1.74546	4.23058e-190	up	yes	1.783	5.59548e-153	up	yes	0.954537	1.73268e-25	up	no	0.513164	2.55142e-11	up	no	Gene.3089::PuPacbio_f2p60_2057_transcript4103_g1::g.3089::m.3089	69-1700[+]	gi|566163416|ref|XM_002304789.2|	3319	E:0	Populus trichocarpa 4-coumarate-CoA ligase family protein (POPTR_0003s18720g) mRNA, complete cds	gi|566163417|ref|XP_002304825.2|	1027	E:0	4-coumarate-CoA ligase family protein [Populus trichocarpa]	4CL1_TOBAC	831	E:0	RecName: Full=4-coumarate--CoA ligase 1;^Eukaryota; Viridiplantae; Streptophyta; Embryophyta; Tracheophyta; Spermatophyta; Magnoliophyta; eudicotyledons; Gunneridae; Pentapetalae; asterids; lamiids; Solanales; Solanaceae; Nicotianoideae; Nicotianeae; Nicotiana	4CL1_TOBAC	852	E:0	RecName: Full=4-coumarate--CoA ligase 1;^Eukaryota; Viridiplantae; Streptophyta; Embryophyta; Tracheophyta; Spermatophyta; Magnoliophyta; eudicotyledons; Gunneridae; Pentapetalae; asterids; lamiids; Solanales; Solanaceae; Nicotianoideae; Nicotianeae; Nicotiana	PF00501.27	AMP-binding	AMP-binding enzyme	.	.	.	.	.	GO:0009698|phenylpropanoid metabolic processGO:0008152|metabolic process	GO:0016207|4-coumarate-CoA ligase activity;GO:0005524|ATP bindingGO:0003824|catalytic activity	.
f2p60_2079_21713	2.79064	0	up	yes	2.5066	0	up	yes	2.10205	2.40456e-225	up	yes	0.994906	3.16645e-45	up	no	0.557293	3.1829e-15	up	no	Gene.10688::PuPacbio_f2p60_2079_transcript21713_g3::g.10688::m.10688	72-1694[+]	gi|566147723|ref|XM_002297663.2|	3517	E:0	Populus trichocarpa 4-coumarate-CoA ligase family protein (POPTR_0001s07400g) mRNA, complete cds	gi|344222904|gb|AEN02915.1|	1043	E:0	4CL3 [Populus nigra]	4CL1_TOBAC	857	E:0	RecName: Full=4-coumarate--CoA ligase 1;^Eukaryota; Viridiplantae; Streptophyta; Embryophyta; Tracheophyta; Spermatophyta; Magnoliophyta; eudicotyledons; Gunneridae; Pentapetalae; asterids; lamiids; Solanales; Solanaceae; Nicotianoideae; Nicotianeae; Nicotiana	4CL1_TOBAC	885	E:0	RecName: Full=4-coumarate--CoA ligase 1;^Eukaryota; Viridiplantae; Streptophyta; Embryophyta; Tracheophyta; Spermatophyta; Magnoliophyta; eudicotyledons; Gunneridae; Pentapetalae; asterids; lamiids; Solanales; Solanaceae; Nicotianoideae; Nicotianeae; Nicotiana	PF00501.27	AMP-binding	AMP-binding enzyme	.	.	.	.	.	GO:0009698|phenylpropanoid metabolic processGO:0008152|metabolic process	GO:0016207|4-coumarate-CoA ligase activity;GO:0005524|ATP bindingGO:0003824|catalytic activity	.
f3p60_2093_21660	1.65342	5.89372e-101	up	yes	1.48398	7.96274e-90	up	yes	1.09018	2.40646e-30	up	yes	1.02173	7.84647e-11	up	yes	0.39875	0.0063971	up	no	Gene.10643::PuPacbio_f3p60_2093_transcript21660_g1::g.10643::m.10643	93-1745[+]	gi|566197661|ref|XM_002318672.2|	3528	E:0	Populus trichocarpa hypothetical protein (POPTR_0012s09650g) mRNA, complete cds	gi|566197662|ref|XP_002318708.2|	1013	E:0	hypothetical protein POPTR_0012s09650g [Populus trichocarpa]	4CLL9_ARATH	654	E:0	RecName: Full=4-coumarate--CoA ligase-like 9;^Eukaryota; Viridiplantae; Streptophyta; Embryophyta; Tracheophyta; Spermatophyta; Magnoliophyta; eudicotyledons; Gunneridae; Pentapetalae; rosids; malvids; Brassicales; Brassicaceae; Camelineae; Arabidopsis	4CLL9_ARATH	695	E:0	RecName: Full=4-coumarate--CoA ligase-like 9;^Eukaryota; Viridiplantae; Streptophyta; Embryophyta; Tracheophyta; Spermatophyta; Magnoliophyta; eudicotyledons; Gunneridae; Pentapetalae; rosids; malvids; Brassicales; Brassicaceae; Camelineae; Arabidopsis	PF00501.27	AMP-binding	AMP-binding enzyme	COG0318	Amp-dependent synthetase and ligase	.	.	.	GO:0009695|jasmonic acid biosynthetic process;GO:0031408|oxylipin biosynthetic processGO:0008152|metabolic process	GO:0005524|ATP binding;GO:0004321|fatty-acyl-CoA synthase activity;GO:0016874|ligase activityGO:0003824|catalytic activity	GO:0005777|peroxisome
f2p60_1424_7654	2.34105	2.07809e-254	up	yes	2.27586	5.33014e-229	up	yes	1.3415	3.72246e-57	up	yes	0.804482	NA	up	no	-0.169511	0.0899175	down	no	Gene.4863::PuPacbio_f2p60_1424_transcript7654_g2::g.4863::m.4863	43-1218[+]	gi|566201920|ref|XM_006374780.1|	2527	E:0	Populus trichocarpa hypothetical protein (POPTR_0014s01950g) mRNA, complete cds	gi|566201921|ref|XP_006374842.1|	807	E:0	hypothetical protein POPTR_0014s01950g [Populus trichocarpa]	5BPOR_DIGLA	568	E:0	RecName: Full=3-oxo-Delta(4,5)-steroid 5-beta-reductase;^Eukaryota; Viridiplantae; Streptophyta; Embryophyta; Tracheophyta; Spermatophyta; Magnoliophyta; eudicotyledons; Gunneridae; Pentapetalae; asterids; lamiids; Lamiales; Plantaginaceae; Digitalideae; Digitalis	5BPOR_DIGLA	568	E:0	RecName: Full=3-oxo-Delta(4,5)-steroid 5-beta-reductase;^Eukaryota; Viridiplantae; Streptophyta; Embryophyta; Tracheophyta; Spermatophyta; Magnoliophyta; eudicotyledons; Gunneridae; Pentapetalae; asterids; lamiids; Lamiales; Plantaginaceae; Digitalideae; Digitalis	PF01370.20	Epimerase	NAD dependent epimerase/dehydratase family	.	.	.	.	.	.	GO:0050662|coenzyme binding;GO:0047787|delta4-3-oxosteroid 5beta-reductase activity;GO:0000166|nucleotide bindingGO:0003824|catalytic activity;GO:0050662|coenzyme binding	.
f2p60_1171_28150	0.0604588	0.914401	up	no	0.109522	0.837235	up	no	-0.151153	0.645449	down	no	1.1089	0.000809915	up	yes	1.15289	0.000511876	up	yes	Gene.14042::PuPacbio_f2p60_1171_transcript28150_g3::g.14042::m.14042	42-968[+]	gi|166064079|gb|AC216835.1|	2041	E:0	Populus trichocarpa clone ACSB1097-H13, complete sequence	gi|743932927|ref|XP_011010763.1|	507	E:1e-177	PREDICTED: metalloendoproteinase 1-like [Populus euphratica]	5MMP_ARATH	190	E:1e-54	RecName: Full=Metalloendoproteinase 5-MMP {ECO:0000303|PubMed:10574937};^Eukaryota; Viridiplantae; Streptophyta; Embryophyta; Tracheophyta; Spermatophyta; Magnoliophyta; eudicotyledons; Gunneridae; Pentapetalae; rosids; malvids; Brassicales; Brassicaceae; Camelineae; Arabidopsis	5MMP_ARATH	221	E:2e-67	RecName: Full=Metalloendoproteinase 5-MMP {ECO:0000303|PubMed:10574937};^Eukaryota; Viridiplantae; Streptophyta; Embryophyta; Tracheophyta; Spermatophyta; Magnoliophyta; eudicotyledons; Gunneridae; Pentapetalae; rosids; malvids; Brassicales; Brassicaceae; Camelineae; Arabidopsis	PF01471.17	PG_binding_1	Putative peptidoglycan binding domain	ENOG410XQ5D	matrix metallopeptidase	.	.	.	GO:0006508|proteolysis	GO:0004222|metalloendopeptidase activity;GO:0008270|zinc ion bindingGO:0004222|metalloendopeptidase activity;GO:0008270|zinc ion binding	GO:0031225|anchored component of membrane;GO:0031012|extracellular matrix;GO:0005886|plasma membraneGO:0031012|extracellular matrix
f3p60_1085_10495	-1.7294	4.28955e-142	down	yes	-1.38615	7.66229e-84	down	yes	-0.931631	1.31015e-28	down	no	-0.406068	1.6511e-06	down	no	-0.0458568	0.49705	down	no	Gene.6083::PuPacbio_f3p60_1085_transcript10495_g4::g.6083::m.6083	2-847[+]	gi|566183167|ref|XM_002311312.2|	1847	E:0	Populus trichocarpa hypothetical protein (POPTR_0008s09680g) mRNA, complete cds	gi|566183168|ref|XP_002311348.2|	532	E:0	hypothetical protein POPTR_0008s09680g [Populus trichocarpa]	6PGL1_ARATH	386	E:2e-132	RecName: Full=Probable 6-phosphogluconolactonase 1;^Eukaryota; Viridiplantae; Streptophyta; Embryophyta; Tracheophyta; Spermatophyta; Magnoliophyta; eudicotyledons; Gunneridae; Pentapetalae; rosids; malvids; Brassicales; Brassicaceae; Camelineae; Arabidopsis	6PGL1_ARATH	394	E:7e-137	RecName: Full=Probable 6-phosphogluconolactonase 1;^Eukaryota; Viridiplantae; Streptophyta; Embryophyta; Tracheophyta; Spermatophyta; Magnoliophyta; eudicotyledons; Gunneridae; Pentapetalae; rosids; malvids; Brassicales; Brassicaceae; Camelineae; Arabidopsis	PF01182.19	Glucosamine_iso	Glucosamine-6-phosphate isomerases/6-phosphogluconolactonase	COG0363	Catalyzes the reversible isomerization-deamination of glucosamine 6-phosphate (GlcN6P) to form fructose 6-phosphate (Fru6P) and ammonium ion (By similarity)	.	.	.	GO:0005975|carbohydrate metabolic process;GO:0009051|pentose-phosphate shunt, oxidative branchGO:0005975|carbohydrate metabolic process	GO:0017057|6-phosphogluconolactonase activity	GO:0005829|cytosol
f8p60_1239_9513	0.738439	2.58162e-22	up	no	1.81718	3.17003e-188	up	yes	1.81369	3.50502e-141	up	yes	1.68485	1.10193e-82	up	yes	0.464152	8.42245e-08	up	no	Gene.5682::PuPacbio_f8p60_1239_transcript9513_g1::g.5682::m.5682	253-1023[+]	gi|743902722|ref|XM_011046405.1|	2015	E:0	PREDICTED: Populus euphratica probable 6-phosphogluconolactonase 4, chloroplastic (LOC105139797), mRNA	gi|224132660|ref|XP_002321377.1|	518	E:0	glucosamine/galactosamine-6-phosphate isomerase family protein [Populus trichocarpa]	6PGL4_ORYSI	368	E:9e-124	RecName: Full=Probable 6-phosphogluconolactonase 4, chloroplastic;^Eukaryota; Viridiplantae; Streptophyta; Embryophyta; Tracheophyta; Spermatophyta; Magnoliophyta; Liliopsida; Poales; Poaceae; BOP clade; Oryzoideae; Oryzeae; Oryzinae; Oryza	6PGL4_ORYSI	368	E:3e-126	RecName: Full=Probable 6-phosphogluconolactonase 4, chloroplastic;^Eukaryota; Viridiplantae; Streptophyta; Embryophyta; Tracheophyta; Spermatophyta; Magnoliophyta; Liliopsida; Poales; Poaceae; BOP clade; Oryzoideae; Oryzeae; Oryzinae; Oryza	PF01182.19	Glucosamine_iso	Glucosamine-6-phosphate isomerases/6-phosphogluconolactonase	COG0363	Catalyzes the reversible isomerization-deamination of glucosamine 6-phosphate (GlcN6P) to form fructose 6-phosphate (Fru6P) and ammonium ion (By similarity)	.	.	.	GO:0005975|carbohydrate metabolic process;GO:0006098|pentose-phosphate shuntGO:0005975|carbohydrate metabolic process	GO:0017057|6-phosphogluconolactonase activity	GO:0009507|chloroplast
f2p40_1649_24163	1.63601	6.47333e-240	up	yes	2.31512	0	up	yes	2.08175	2.25756e-247	up	yes	1.67659	3.3719e-70	up	yes	0.489507	4.73666e-06	up	no	Gene.12125::PuPacbio_f2p40_1649_transcript24163_g1::g.12125::m.12125	3-1355[+]	gi|566156404|ref|XM_002302086.2|	2771	E:0	Populus trichocarpa hypothetical protein (POPTR_0002s05580g) mRNA, complete cds	gi|224066523|ref|XP_002302122.1|	802	E:0	hypothetical protein POPTR_0002s05580g [Populus trichocarpa]	7SB1_SOYBN	249	E:1e-74	RecName: Full=Basic 7S globulin;^Eukaryota; Viridiplantae; Streptophyta; Embryophyta; Tracheophyta; Spermatophyta; Magnoliophyta; eudicotyledons; Gunneridae; Pentapetalae; rosids; fabids; Fabales; Fabaceae; Papilionoideae; Phaseoleae; Glycine; Soja	7SB1_SOYBN	294	E:5e-93	RecName: Full=Basic 7S globulin;^Eukaryota; Viridiplantae; Streptophyta; Embryophyta; Tracheophyta; Spermatophyta; Magnoliophyta; eudicotyledons; Gunneridae; Pentapetalae; rosids; fabids; Fabales; Fabaceae; Papilionoideae; Phaseoleae; Glycine; Soja	PF14543.5	TAXi_N	Xylanase inhibitor N-terminal	ENOG410XNV7	aspartic	.	ExpAA=30.41^PredHel=1^Topology=i7-29o	.	GO:0030163|protein catabolic process;GO:0006508|proteolysis	GO:0004190|aspartic-type endopeptidase activity;GO:0042802|identical protein binding;GO:0045735|nutrient reservoir activity	.
f5p60_1638_24241	1.44884	6.93081e-127	up	yes	1.44458	2.52092e-141	up	yes	1.59934	6.73969e-132	up	yes	1.05761	9.55712e-30	up	yes	0.690792	8.63215e-10	up	no	Gene.12156::PuPacbio_f5p60_1638_transcript24241_g1::g.12156::m.12156	37-1389[+]	gi|118487588|gb|EF147610.1|	2844	E:0	Populus trichocarpa clone WS0123_M18 unknown mRNA	gi|566150807|ref|XP_006369525.1|	813	E:0	hypothetical protein POPTR_0001s24740g [Populus trichocarpa]	7SB1_SOYBN	143	E:6e-36	RecName: Full=Basic 7S globulin;^Eukaryota; Viridiplantae; Streptophyta; Embryophyta; Tracheophyta; Spermatophyta; Magnoliophyta; eudicotyledons; Gunneridae; Pentapetalae; rosids; fabids; Fabales; Fabaceae; Papilionoideae; Phaseoleae; Glycine; Soja	7SB1_SOYBN	181	E:6e-50	RecName: Full=Basic 7S globulin;^Eukaryota; Viridiplantae; Streptophyta; Embryophyta; Tracheophyta; Spermatophyta; Magnoliophyta; eudicotyledons; Gunneridae; Pentapetalae; rosids; fabids; Fabales; Fabaceae; Papilionoideae; Phaseoleae; Glycine; Soja	PF14543.5	TAXi_N	Xylanase inhibitor N-terminal	ENOG410XNV7	aspartic	.	.	.	GO:0030163|protein catabolic process;GO:0006508|proteolysis	GO:0004190|aspartic-type endopeptidase activity;GO:0042802|identical protein binding;GO:0045735|nutrient reservoir activity	.
f2p60_1564_24764	2.71742	1.12989e-09	up	yes	3.71941	1.75711e-22	up	yes	2.29451	2.45773e-10	up	yes	0.67565	0.0336038	up	no	0.78835	0.0168797	up	no	Gene.12452::PuPacbio_f2p60_1564_transcript24764_g9::g.12452::m.12452	41-1336[+]	gi|566174904|ref|XM_002308948.2|	2710	E:0	Populus trichocarpa hypothetical protein (POPTR_0006s06820g) mRNA, complete cds	gi|566174905|ref|XP_002308984.2|	801	E:0	hypothetical protein POPTR_0006s06820g [Populus trichocarpa]	7SBG2_SOYBN	249	E:8e-75	RecName: Full=Basic 7S globulin 2;^Eukaryota; Viridiplantae; Streptophyta; Embryophyta; Tracheophyta; Spermatophyta; Magnoliophyta; eudicotyledons; Gunneridae; Pentapetalae; rosids; fabids; Fabales; Fabaceae; Papilionoideae; Phaseoleae; Glycine; Soja	7SB1_SOYBN	268	E:5e-83	RecName: Full=Basic 7S globulin;^Eukaryota; Viridiplantae; Streptophyta; Embryophyta; Tracheophyta; Spermatophyta; Magnoliophyta; eudicotyledons; Gunneridae; Pentapetalae; rosids; fabids; Fabales; Fabaceae; Papilionoideae; Phaseoleae; Glycine; Soja	PF14543.5	TAXi_N	Xylanase inhibitor N-terminal	ENOG410XNV7	aspartic	.	.	.	GO:0030163|protein catabolic process;GO:0006508|proteolysis	GO:0004190|aspartic-type endopeptidase activity;GO:0042802|identical protein binding;GO:0045735|nutrient reservoir activity	.
f2p60_1244_27411	0.599645	0.0165216	up	no	1.15901	1.45973e-07	up	yes	-0.439913	0.0990721	down	no	0.142291	0.664947	up	no	-0.523412	0.0383241	down	no	Gene.13735::PuPacbio_f2p60_1244_transcript27411_g3::g.13735::m.13735	1-1038[+]	gi|118487891|gb|EF147765.1|	2224	E:0	Populus trichocarpa clone WS0124_N24 unknown mRNA	gi|224077380|ref|XP_002305237.1|	681	E:0	hypothetical protein POPTR_0004s08030g [Populus trichocarpa]	AAE11_ARATH	412	E:1e-137	RecName: Full=Butyrate--CoA ligase AAE11, peroxisomal;^Eukaryota; Viridiplantae; Streptophyta; Embryophyta; Tracheophyta; Spermatophyta; Magnoliophyta; eudicotyledons; Gunneridae; Pentapetalae; rosids; malvids; Brassicales; Brassicaceae; Camelineae; Arabidopsis	AAE11_ARATH	414	E:4e-139	RecName: Full=Butyrate--CoA ligase AAE11, peroxisomal;^Eukaryota; Viridiplantae; Streptophyta; Embryophyta; Tracheophyta; Spermatophyta; Magnoliophyta; eudicotyledons; Gunneridae; Pentapetalae; rosids; malvids; Brassicales; Brassicaceae; Camelineae; Arabidopsis	PF00501.27	AMP-binding	AMP-binding enzyme	COG0318	Amp-dependent synthetase and ligase	.	.	.	GO:0019605|butyrate metabolic processGO:0008152|metabolic process	GO:0047760|butyrate-CoA ligase activityGO:0003824|catalytic activity	GO:0005777|peroxisome
f2p52_2116_21547	-2.06697	1.42922e-40	down	yes	-1.37226	7.11712e-26	down	yes	-1.28916	4.49307e-24	down	yes	-0.0140636	0.89708	down	no	0.332475	0.0202816	up	no	Gene.10567::PuPacbio_f2p52_2116_transcript21547_g1::g.10567::m.10567	139-1800[+]	gi|743910524|ref|XM_011050475.1|	3465	E:0	PREDICTED: Populus euphratica probable acyl-activating enzyme 6 (LOC105142711), mRNA	gi|566207291|ref|XP_002321934.2|	1142	E:0	hypothetical protein POPTR_0015s12700g [Populus trichocarpa]	AAE6_ARATH	762	E:0	RecName: Full=Probable acyl-activating enzyme 6;^Eukaryota; Viridiplantae; Streptophyta; Embryophyta; Tracheophyta; Spermatophyta; Magnoliophyta; eudicotyledons; Gunneridae; Pentapetalae; rosids; malvids; Brassicales; Brassicaceae; Camelineae; Arabidopsis	AAE6_ARATH	762	E:0	RecName: Full=Probable acyl-activating enzyme 6;^Eukaryota; Viridiplantae; Streptophyta; Embryophyta; Tracheophyta; Spermatophyta; Magnoliophyta; eudicotyledons; Gunneridae; Pentapetalae; rosids; malvids; Brassicales; Brassicaceae; Camelineae; Arabidopsis	PF00501.27	AMP-binding	AMP-binding enzyme	COG0318	Amp-dependent synthetase and ligase	.	.	.	GO:0006631|fatty acid metabolic processGO:0008152|metabolic process	GO:0016874|ligase activityGO:0003824|catalytic activity	.
f2p42_1853_4974	0.0354791	0.94024	up	no	-2.34993	5.56688e-06	down	yes	0.253509	0.467852	up	no	-0.48253	0.150782	down	no	0.546579	0.0748306	up	no	Gene.3540::PuPacbio_f2p42_1853_transcript4974_g1::g.3540::m.3540	109-1593[+]	gi|566179619|ref|XM_006380335.1|	3105	E:0	Populus trichocarpa hypothetical protein (POPTR_0007s04710g) mRNA, complete cds	gi|566179620|ref|XP_006380397.1|	943	E:0	hypothetical protein POPTR_0007s04710g [Populus trichocarpa]	AAP2_ARATH	771	E:0	RecName: Full=Amino acid permease 2;^Eukaryota; Viridiplantae; Streptophyta; Embryophyta; Tracheophyta; Spermatophyta; Magnoliophyta; eudicotyledons; Gunneridae; Pentapetalae; rosids; malvids; Brassicales; Brassicaceae; Camelineae; Arabidopsis	AAP2_ARATH	795	E:0	RecName: Full=Amino acid permease 2;^Eukaryota; Viridiplantae; Streptophyta; Embryophyta; Tracheophyta; Spermatophyta; Magnoliophyta; eudicotyledons; Gunneridae; Pentapetalae; rosids; malvids; Brassicales; Brassicaceae; Camelineae; Arabidopsis	PF01490.17	Aa_trans	Transmembrane amino acid transporter protein	COG0814	amino acid transport	.	ExpAA=209.05^PredHel=9^Topology=i54-76o80-102i140-161o204-226i297-319o334-356i398-417o421-439i460-482o	.	GO:0015800|acidic amino acid transport;GO:0015804|neutral amino acid transport	GO:0015293|symporter activity	GO:0005887|integral component of plasma membrane
f2p31_1944_22326	-1.33487	4.80365e-137	down	yes	-1.9094	2.92222e-228	down	yes	-0.562085	5.05338e-17	down	no	-0.923657	8.9413e-22	down	no	-0.552493	5.5032e-05	down	no	Gene.11065::PuPacbio_f2p31_1944_transcript22326_g2::g.11065::m.11065	128-1612[+]	gi|566169935|ref|XM_002307017.2|	3014	E:0	Populus trichocarpa hypothetical protein (POPTR_0005s06990g) mRNA, complete cds	gi|566169936|ref|XP_002307053.2|	978	E:0	hypothetical protein POPTR_0005s06990g [Populus trichocarpa]	AAP2_ARATH	798	E:0	RecName: Full=Amino acid permease 2;^Eukaryota; Viridiplantae; Streptophyta; Embryophyta; Tracheophyta; Spermatophyta; Magnoliophyta; eudicotyledons; Gunneridae; Pentapetalae; rosids; malvids; Brassicales; Brassicaceae; Camelineae; Arabidopsis	AAP2_ARATH	801	E:0	RecName: Full=Amino acid permease 2;^Eukaryota; Viridiplantae; Streptophyta; Embryophyta; Tracheophyta; Spermatophyta; Magnoliophyta; eudicotyledons; Gunneridae; Pentapetalae; rosids; malvids; Brassicales; Brassicaceae; Camelineae; Arabidopsis	PF01490.17	Aa_trans	Transmembrane amino acid transporter protein	COG0814	amino acid transport	.	ExpAA=209.04^PredHel=9^Topology=i54-76o80-102i140-161o204-226i296-318o333-355i399-418o422-439i460-482o	.	GO:0015800|acidic amino acid transport;GO:0015804|neutral amino acid transport	GO:0015293|symporter activity	GO:0005887|integral component of plasma membrane
f2p60_2046_21834	0.335841	0.232691	up	no	-0.765823	0.00854097	down	no	1.12304	1.58504e-06	up	yes	-0.0694074	0.797892	down	no	0.500937	0.0520655	up	no	Gene.10766::PuPacbio_f2p60_2046_transcript21834_g2::g.10766::m.10766	310-1788[+]	gi|566169933|ref|XM_006382821.1|	2900	E:0	Populus trichocarpa amino acid permease AAP1 family protein (POPTR_0005s06990g) mRNA, complete cds	gi|566169936|ref|XP_002307053.2|	974	E:0	hypothetical protein POPTR_0005s06990g [Populus trichocarpa]	AAP2_ARATH	798	E:0	RecName: Full=Amino acid permease 2;^Eukaryota; Viridiplantae; Streptophyta; Embryophyta; Tracheophyta; Spermatophyta; Magnoliophyta; eudicotyledons; Gunneridae; Pentapetalae; rosids; malvids; Brassicales; Brassicaceae; Camelineae; Arabidopsis	AAP2_ARATH	801	E:0	RecName: Full=Amino acid permease 2;^Eukaryota; Viridiplantae; Streptophyta; Embryophyta; Tracheophyta; Spermatophyta; Magnoliophyta; eudicotyledons; Gunneridae; Pentapetalae; rosids; malvids; Brassicales; Brassicaceae; Camelineae; Arabidopsis	PF01490.17	Aa_trans	Transmembrane amino acid transporter protein	COG0814	amino acid transport	.	ExpAA=210.16^PredHel=9^Topology=i52-74o78-100i138-159o202-224i294-316o331-353i397-416o420-437i458-480o	.	GO:0015800|acidic amino acid transport;GO:0015804|neutral amino acid transport	GO:0015293|symporter activity	GO:0005887|integral component of plasma membrane
f2p60_2219_21164	1.0452	1.23265e-37	up	yes	1.37914	6.43934e-77	up	yes	0.893915	4.35892e-23	up	no	1.4877	1.8432e-50	up	yes	1.13304	5.32286e-22	up	yes	Gene.10295::PuPacbio_f2p60_2219_transcript21164_g2::g.10295::m.10295	394-1851[+]	gi|118487910|gb|EF147775.1|	3160	E:0	Populus trichocarpa clone WS0124_P09 unknown mRNA	gi|566172341|ref|XP_002306650.2|	942	E:0	hypothetical protein POPTR_0005s20400g [Populus trichocarpa]	AAP3_ARATH	751	E:0	RecName: Full=Amino acid permease 3;^Eukaryota; Viridiplantae; Streptophyta; Embryophyta; Tracheophyta; Spermatophyta; Magnoliophyta; eudicotyledons; Gunneridae; Pentapetalae; rosids; malvids; Brassicales; Brassicaceae; Camelineae; Arabidopsis	AAP3_ARATH	758	E:0	RecName: Full=Amino acid permease 3;^Eukaryota; Viridiplantae; Streptophyta; Embryophyta; Tracheophyta; Spermatophyta; Magnoliophyta; eudicotyledons; Gunneridae; Pentapetalae; rosids; malvids; Brassicales; Brassicaceae; Camelineae; Arabidopsis	PF01490.17	Aa_trans	Transmembrane amino acid transporter protein	COG0814	amino acid transport	.	ExpAA=200.41^PredHel=9^Topology=i44-66o71-93i131-152o196-218i286-308o318-340i389-408o412-434i446-468o	.	GO:0003333|amino acid transmembrane transport;GO:0015802|basic amino acid transport	GO:0015171|amino acid transmembrane transporter activity;GO:0015293|symporter activity	GO:0016021|integral component of membrane;GO:0031965|nuclear membrane;GO:0005886|plasma membrane
f2p60_1666_24049	-1.38281	1.4275e-193	down	yes	-0.946607	6.61715e-107	down	no	-0.370067	9.29468e-10	down	no	-0.752614	NA	down	no	-0.0246771	0.64587	down	no	Gene.12063::PuPacbio_f2p60_1666_transcript24049_g2::g.12063::m.12063	110-1333[+]	gi|566214910|ref|XM_002324961.2|	2817	E:0	Populus trichocarpa aspartate aminotransferase family protein (POPTR_0018s08910g) mRNA, complete cds	gi|224143559|ref|XP_002324997.1|	840	E:0	aspartate aminotransferase family protein [Populus trichocarpa]	AATC_DAUCA	759	E:0	RecName: Full=Aspartate aminotransferase, cytoplasmic;^Eukaryota; Viridiplantae; Streptophyta; Embryophyta; Tracheophyta; Spermatophyta; Magnoliophyta; eudicotyledons; Gunneridae; Pentapetalae; asterids; campanulids; Apiales; Apiaceae; Apioideae; Scandiceae; Daucinae; Daucus; Daucus sect. Daucus	AATC_DAUCA	759	E:0	RecName: Full=Aspartate aminotransferase, cytoplasmic;^Eukaryota; Viridiplantae; Streptophyta; Embryophyta; Tracheophyta; Spermatophyta; Magnoliophyta; eudicotyledons; Gunneridae; Pentapetalae; asterids; campanulids; Apiales; Apiaceae; Apioideae; Scandiceae; Daucinae; Daucus; Daucus sect. Daucus	PF00155.20	Aminotran_1_2	Aminotransferase class I and II	.	.	.	.	.	GO:0006103|2-oxoglutarate metabolic process;GO:0006531|aspartate metabolic process;GO:0009058|biosynthetic process;GO:0006536|glutamate metabolic processGO:0009058|biosynthetic process	GO:0004069|L-aspartate:2-oxoglutarate aminotransferase activity;GO:0080130|L-phenylalanine:2-oxoglutarate aminotransferase activity;GO:0030170|pyridoxal phosphate bindingGO:0030170|pyridoxal phosphate binding	GO:0005737|cytoplasm
f3p60_706_33620	-0.803473	0.138107	down	no	-0.692769	NA	down	no	-2.10787	2.73145e-11	down	yes	-0.303306	0.216816	down	no	-0.28263	0.237593	down	no	Gene.16162::PuPacbio_f3p60_706_transcript33620_g2::g.16162::m.16162	3-356[+]	gi|566206440|ref|XM_006374415.1|	865	E:0	Populus trichocarpa ABC transporter family protein (POPTR_0015s07470g) mRNA, complete cds	gi|566206441|ref|XP_006374477.1|	241	E:1e-70	ABC transporter family protein [Populus trichocarpa]	AB10A_ARATH	176	E:7e-49	RecName: Full=ABC transporter A family member 10;^Eukaryota; Viridiplantae; Streptophyta; Embryophyta; Tracheophyta; Spermatophyta; Magnoliophyta; eudicotyledons; Gunneridae; Pentapetalae; rosids; malvids; Brassicales; Brassicaceae; Camelineae; Arabidopsis	AB10A_ARATH	176	E:1e-50	RecName: Full=ABC transporter A family member 10;^Eukaryota; Viridiplantae; Streptophyta; Embryophyta; Tracheophyta; Spermatophyta; Magnoliophyta; eudicotyledons; Gunneridae; Pentapetalae; rosids; malvids; Brassicales; Brassicaceae; Camelineae; Arabidopsis	.	.	.	.	.	.	.	.	GO:0006869|lipid transport	GO:0005524|ATP binding;GO:0042626|ATPase activity, coupled to transmembrane movement of substances	GO:0016021|integral component of membrane;GO:0043231|intracellular membrane-bounded organelle
f5p60_2308_3207	-0.288006	3.86247e-06	down	no	0.48228	4.44296e-15	up	no	1.16801	7.27723e-75	up	yes	0.726159	1.7925e-23	up	no	0.992088	2.23858e-57	up	no	Gene.2531::PuPacbio_f5p60_2308_transcript3207_g1::g.2531::m.2531	99-665[+]	gi|566160709|ref|XM_002304077.2|	4048	E:0	Populus trichocarpa hypothetical protein (POPTR_0003s03650g) mRNA, complete cds	gi|566160710|ref|XP_002304113.2|	867	E:0	hypothetical protein POPTR_0003s03650g [Populus trichocarpa]	AB14G_ARATH	727	E:0	RecName: Full=ABC transporter G family member 14;^Eukaryota; Viridiplantae; Streptophyta; Embryophyta; Tracheophyta; Spermatophyta; Magnoliophyta; eudicotyledons; Gunneridae; Pentapetalae; rosids; malvids; Brassicales; Brassicaceae; Camelineae; Arabidopsis	AB14G_ARATH	258	E:2e-80	RecName: Full=ABC transporter G family member 14;^Eukaryota; Viridiplantae; Streptophyta; Embryophyta; Tracheophyta; Spermatophyta; Magnoliophyta; eudicotyledons; Gunneridae; Pentapetalae; rosids; malvids; Brassicales; Brassicaceae; Camelineae; Arabidopsis	PF00005.26	ABC_tran	ABC transporter	COG1131	(ABC) transporter	.	.	.	GO:0010588|cotyledon vascular tissue pattern formation;GO:0010222|stem vascular tissue pattern formation	GO:0005524|ATP binding;GO:0042626|ATPase activity, coupled to transmembrane movement of substancesGO:0005524|ATP binding;GO:0016887|ATPase activity	GO:0016021|integral component of membrane;GO:0005886|plasma membrane
f2p60_2367_20734	0.233959	0.0432784	up	no	0.990581	1.16465e-22	up	no	1.10095	2.14118e-18	up	yes	0.73943	3.44853e-09	up	no	0.947918	9.9644e-18	up	no	Gene.9994::PuPacbio_f2p60_2367_transcript20734_g2::g.9994::m.9994	1267-1596[+]	gi|566168477|ref|XM_006385102.1|	3775	E:0	Populus trichocarpa ABC transporter family protein (POPTR_0004s24450g) mRNA, complete cds	gi|743937466|ref|XP_011013139.1|	756	E:0	PREDICTED: ABC transporter G family member 14-like [Populus euphratica]	AB14G_ARATH	600	E:0	RecName: Full=ABC transporter G family member 14;^Eukaryota; Viridiplantae; Streptophyta; Embryophyta; Tracheophyta; Spermatophyta; Magnoliophyta; eudicotyledons; Gunneridae; Pentapetalae; rosids; malvids; Brassicales; Brassicaceae; Camelineae; Arabidopsis	AB14G_ARATH	84.7	E:2e-18	RecName: Full=ABC transporter G family member 14;^Eukaryota; Viridiplantae; Streptophyta; Embryophyta; Tracheophyta; Spermatophyta; Magnoliophyta; eudicotyledons; Gunneridae; Pentapetalae; rosids; malvids; Brassicales; Brassicaceae; Camelineae; Arabidopsis	.	.	.	COG1131	(ABC) transporter	.	ExpAA=22.20^PredHel=1^Topology=i56-78o	.	GO:0010588|cotyledon vascular tissue pattern formation;GO:0010222|stem vascular tissue pattern formation	GO:0005524|ATP binding;GO:0042626|ATPase activity, coupled to transmembrane movement of substances	GO:0016021|integral component of membrane;GO:0005886|plasma membrane
f4p60_2751_19739	-0.890024	7.8772e-15	down	no	0.0958825	0.309482	up	no	-0.59962	1.306e-07	down	no	-0.438591	NA	down	no	-1.15988	3.11246e-19	down	yes	Gene.9328::PuPacbio_f4p60_2751_transcript19739_g2::g.9328::m.9328	234-2519[+]	gi|743844955|ref|XM_011029044.1|	3975	E:0	PREDICTED: Populus euphratica ABC transporter G family member 6-like (LOC105127665), mRNA	gi|743844956|ref|XP_011027346.1|	1366	E:0	PREDICTED: ABC transporter G family member 6-like [Populus euphratica]	AB16G_ARATH	1016	E:0	RecName: Full=ABC transporter G family member 16;^Eukaryota; Viridiplantae; Streptophyta; Embryophyta; Tracheophyta; Spermatophyta; Magnoliophyta; eudicotyledons; Gunneridae; Pentapetalae; rosids; malvids; Brassicales; Brassicaceae; Camelineae; Arabidopsis	AB16G_ARATH	1082	E:0	RecName: Full=ABC transporter G family member 16;^Eukaryota; Viridiplantae; Streptophyta; Embryophyta; Tracheophyta; Spermatophyta; Magnoliophyta; eudicotyledons; Gunneridae; Pentapetalae; rosids; malvids; Brassicales; Brassicaceae; Camelineae; Arabidopsis	PF00005.26	ABC_tran	ABC transporter	COG1131	(ABC) transporter	.	ExpAA=146.25^PredHel=6^Topology=i474-496o507-529i549-571o584-606i613-635o734-756i	.	GO:0010208|pollen wall assembly	GO:0005524|ATP binding;GO:0042626|ATPase activity, coupled to transmembrane movement of substancesGO:0005524|ATP binding;GO:0016887|ATPase activity	GO:0016021|integral component of membrane;GO:0005886|plasma membraneGO:0016020|membrane
f2p60_910_11933	-0.426509	0.240468	down	no	0.233506	0.458768	up	no	1.56868	1.77698e-10	up	yes	0.500634	0.0758095	up	no	1.01888	0.000148027	up	yes	Gene.6610::PuPacbio_f2p60_910_transcript11933_g1::g.6610::m.6610	75-707[+]	gi|168176844|gb|AC217588.1|	1515	E:0	Populus trichocarpa clone POP047-P10, complete sequence	gi|118487720|gb|ABK95684.1|	352	E:1e-119	unknown [Populus trichocarpa]	AB19A_PRUPE	251	E:3e-81	RecName: Full=Auxin-binding protein ABP19a;^Eukaryota; Viridiplantae; Streptophyta; Embryophyta; Tracheophyta; Spermatophyta; Magnoliophyta; eudicotyledons; Gunneridae; Pentapetalae; rosids; fabids; Rosales; Rosaceae; Maloideae; Amygdaleae; Prunus	AB19A_PRUPE	281	E:2e-94	RecName: Full=Auxin-binding protein ABP19a;^Eukaryota; Viridiplantae; Streptophyta; Embryophyta; Tracheophyta; Spermatophyta; Magnoliophyta; eudicotyledons; Gunneridae; Pentapetalae; rosids; fabids; Rosales; Rosaceae; Maloideae; Amygdaleae; Prunus	PF00190.21	Cupin_1	Cupin	.	.	.	.	.	GO:0009734|auxin-activated signaling pathway	GO:0030145|manganese ion binding;GO:0045735|nutrient reservoir activityGO:0045735|nutrient reservoir activity	GO:0048046|apoplast;GO:0005618|cell wall
f2p60_1059_29388	-0.280699	0.483689	down	no	0.328455	0.342724	up	no	1.60869	3.03458e-09	up	yes	0.778074	0.00892998	up	no	1.14368	1.28717e-05	up	yes	Gene.14566::PuPacbio_f2p60_1059_transcript29388_g6::g.14566::m.14566	3-665[+]	gi|168176844|gb|AC217588.1|	1698	E:0	Populus trichocarpa clone POP047-P10, complete sequence	gi|566161176|ref|XP_002304136.2|	354	E:1e-119	germin-like family protein [Populus trichocarpa]	AB19A_PRUPE	250	E:4e-80	RecName: Full=Auxin-binding protein ABP19a;^Eukaryota; Viridiplantae; Streptophyta; Embryophyta; Tracheophyta; Spermatophyta; Magnoliophyta; eudicotyledons; Gunneridae; Pentapetalae; rosids; fabids; Rosales; Rosaceae; Maloideae; Amygdaleae; Prunus	AB19A_PRUPE	280	E:1e-93	RecName: Full=Auxin-binding protein ABP19a;^Eukaryota; Viridiplantae; Streptophyta; Embryophyta; Tracheophyta; Spermatophyta; Magnoliophyta; eudicotyledons; Gunneridae; Pentapetalae; rosids; fabids; Rosales; Rosaceae; Maloideae; Amygdaleae; Prunus	PF00190.21	Cupin_1	Cupin	.	.	.	.	.	GO:0009734|auxin-activated signaling pathway	GO:0030145|manganese ion binding;GO:0045735|nutrient reservoir activityGO:0045735|nutrient reservoir activity	GO:0048046|apoplast;GO:0005618|cell wall
f2p60_1053_10589	0.339258	0.539844	up	no	2.37742	2.61542e-08	up	yes	2.45939	1.54878e-12	up	yes	2.06128	1.54636e-10	up	yes	2.13952	1.89951e-11	up	yes	Gene.6113::PuPacbio_f2p60_1053_transcript10589_g2::g.6113::m.6113	3-665[+]	gi|566149484|ref|XM_002299555.2|	1814	E:0	Populus trichocarpa germin-like family protein (POPTR_0001s16910g) mRNA, complete cds	gi|566149485|ref|XP_002299591.2|	353	E:2e-119	germin-like family protein [Populus trichocarpa]	AB19A_PRUPE	248	E:2e-79	RecName: Full=Auxin-binding protein ABP19a;^Eukaryota; Viridiplantae; Streptophyta; Embryophyta; Tracheophyta; Spermatophyta; Magnoliophyta; eudicotyledons; Gunneridae; Pentapetalae; rosids; fabids; Rosales; Rosaceae; Maloideae; Amygdaleae; Prunus	AB19A_PRUPE	278	E:3e-93	RecName: Full=Auxin-binding protein ABP19a;^Eukaryota; Viridiplantae; Streptophyta; Embryophyta; Tracheophyta; Spermatophyta; Magnoliophyta; eudicotyledons; Gunneridae; Pentapetalae; rosids; fabids; Rosales; Rosaceae; Maloideae; Amygdaleae; Prunus	PF00190.21	Cupin_1	Cupin	.	.	.	ExpAA=46.40^PredHel=1^Topology=i9-31o	.	GO:0009734|auxin-activated signaling pathway	GO:0030145|manganese ion binding;GO:0045735|nutrient reservoir activityGO:0045735|nutrient reservoir activity	GO:0048046|apoplast;GO:0005618|cell wall
f3p28_3480_18620	-0.86417	3.35635e-17	down	no	-1.17973	1.93916e-32	down	yes	-0.457123	3.42793e-06	down	no	-0.342588	0.00806427	down	no	-0.226787	0.0200884	down	no	Gene.8533::PuPacbio_f3p28_3480_transcript18620_g1::g.8533::m.8533	1-3222[+]	gi|566212791|ref|XM_002323811.2|	6296	E:0	Populus trichocarpa multidrug resistance P-glycoprotein (POPTR_0017s11750g) mRNA, complete cds	gi|224140965|ref|XP_002323847.1|	2029	E:0	multidrug resistance P-glycoprotein [Populus trichocarpa]	AB19B_ARATH	1816	E:0	RecName: Full=ABC transporter B family member 19;^Eukaryota; Viridiplantae; Streptophyta; Embryophyta; Tracheophyta; Spermatophyta; Magnoliophyta; eudicotyledons; Gunneridae; Pentapetalae; rosids; malvids; Brassicales; Brassicaceae; Camelineae; Arabidopsis	AB19B_ARATH	1959	E:0	RecName: Full=ABC transporter B family member 19;^Eukaryota; Viridiplantae; Streptophyta; Embryophyta; Tracheophyta; Spermatophyta; Magnoliophyta; eudicotyledons; Gunneridae; Pentapetalae; rosids; malvids; Brassicales; Brassicaceae; Camelineae; Arabidopsis	PF00664.22	ABC_membrane	ABC transporter transmembrane region	COG1132	(ABC) transporter	.	ExpAA=161.88^PredHel=6^Topology=o10-32i90-112o516-538i551-573o644-666i735-757o	.	GO:0010541|acropetal auxin transport;GO:0043481|anthocyanin accumulation in tissues in response to UV light;GO:0009926|auxin polar transport;GO:0060918|auxin transport;GO:0009734|auxin-activated signaling pathway;GO:0010540|basipetal auxin transport;GO:0090691|formation of plant organ boundary;GO:0048527|lateral root development;GO:0009640|photomorphogenesis;GO:0009958|positive gravitropism;GO:00…	GO:0005524|ATP binding;GO:0042626|ATPase activity, coupled to transmembrane movement of substances;GO:0010329|auxin efflux transmembrane transporter activityGO:0005524|ATP binding;GO:0042626|ATPase activity, coupled to transmembrane movement of substances;GO:0016887|ATPase activity	GO:0016021|integral component of membrane;GO:0005886|plasma membraneGO:0016021|integral component of membrane
f3p60_2351_3129	-1.18501	1.16884e-145	down	yes	-0.787934	4.09667e-49	down	no	-0.737618	7.4176e-36	down	no	-0.40123	9.59287e-07	down	no	-0.106867	0.0709831	down	no	Gene.2477::PuPacbio_f3p60_2351_transcript3129_g1::g.2477::m.2477	109-1908[+]	gi|566185735|ref|XM_002314261.2|	4115	E:0	Populus trichocarpa ABC transporter family protein (POPTR_0009s01320g) mRNA, complete cds	gi|224106822|ref|XP_002314297.1|	1092	E:0	ABC transporter family protein [Populus trichocarpa]	AB1F_ARATH	956	E:0	RecName: Full=ABC transporter F family member 1;^Eukaryota; Viridiplantae; Streptophyta; Embryophyta; Tracheophyta; Spermatophyta; Magnoliophyta; eudicotyledons; Gunneridae; Pentapetalae; rosids; malvids; Brassicales; Brassicaceae; Camelineae; Arabidopsis	AB1F_ARATH	1021	E:0	RecName: Full=ABC transporter F family member 1;^Eukaryota; Viridiplantae; Streptophyta; Embryophyta; Tracheophyta; Spermatophyta; Magnoliophyta; eudicotyledons; Gunneridae; Pentapetalae; rosids; malvids; Brassicales; Brassicaceae; Camelineae; Arabidopsis	PF00005.26	ABC_tran	ABC transporter	COG0488	(ABC) transporter	.	.	.	.	GO:0005524|ATP binding;GO:0016887|ATPase activity;GO:0005215|transporter activityGO:0005524|ATP binding;GO:0016887|ATPase activity	GO:0005886|plasma membrane
f2p18_2380_20692	-1.21966	1.40051e-136	down	yes	-0.856904	1.59065e-68	down	no	-0.781826	4.98354e-34	down	no	-0.430043	1.73971e-08	down	no	-0.143873	0.0209596	down	no	Gene.9960::PuPacbio_f2p18_2380_transcript20692_g1::g.9960::m.9960	99-1898[+]	gi|566185735|ref|XM_002314261.2|	4133	E:0	Populus trichocarpa ABC transporter family protein (POPTR_0009s01320g) mRNA, complete cds	gi|224106822|ref|XP_002314297.1|	1092	E:0	ABC transporter family protein [Populus trichocarpa]	AB1F_ARATH	956	E:0	RecName: Full=ABC transporter F family member 1;^Eukaryota; Viridiplantae; Streptophyta; Embryophyta; Tracheophyta; Spermatophyta; Magnoliophyta; eudicotyledons; Gunneridae; Pentapetalae; rosids; malvids; Brassicales; Brassicaceae; Camelineae; Arabidopsis	AB1F_ARATH	1021	E:0	RecName: Full=ABC transporter F family member 1;^Eukaryota; Viridiplantae; Streptophyta; Embryophyta; Tracheophyta; Spermatophyta; Magnoliophyta; eudicotyledons; Gunneridae; Pentapetalae; rosids; malvids; Brassicales; Brassicaceae; Camelineae; Arabidopsis	PF00005.26	ABC_tran	ABC transporter	COG0488	(ABC) transporter	.	.	.	.	GO:0005524|ATP binding;GO:0016887|ATPase activity;GO:0005215|transporter activityGO:0005524|ATP binding;GO:0016887|ATPase activity	GO:0005886|plasma membrane
f2p60_1321_26735	1.37755	2.707e-63	up	yes	1.27026	8.21043e-58	up	yes	0.887794	4.08955e-22	up	no	0.685554	1.85283e-15	up	no	0.391383	3.79977e-05	up	no	Gene.13402::PuPacbio_f2p60_1321_transcript26735_g4::g.13402::m.13402	48-440[+]	gi|566175233|ref|XM_002308124.2|	2194	E:0	Populus trichocarpa hypothetical protein (POPTR_0006s08620g) mRNA, complete cds	gi|566175234|ref|XP_002308160.2|	366	E:2e-165	hypothetical protein POPTR_0006s08620g [Populus trichocarpa]	AB20I_ARATH	309	E:5e-141	RecName: Full=ABC transporter I family member 20;^Eukaryota; Viridiplantae; Streptophyta; Embryophyta; Tracheophyta; Spermatophyta; Magnoliophyta; eudicotyledons; Gunneridae; Pentapetalae; rosids; malvids; Brassicales; Brassicaceae; Camelineae; Arabidopsis	AB20I_ARATH	214	E:7e-68	RecName: Full=ABC transporter I family member 20;^Eukaryota; Viridiplantae; Streptophyta; Embryophyta; Tracheophyta; Spermatophyta; Magnoliophyta; eudicotyledons; Gunneridae; Pentapetalae; rosids; malvids; Brassicales; Brassicaceae; Camelineae; Arabidopsis	PF00005.26	ABC_tran	ABC transporter	.	.	.	.	.	GO:0006810|transport	GO:0005524|ATP binding;GO:0016887|ATPase activityGO:0005524|ATP binding;GO:0016887|ATPase activity	GO:0005737|cytoplasm
f3p22_4425_219	-1.18024	7.57469e-68	down	yes	-1.14309	4.24847e-105	down	yes	-0.620426	1.01179e-14	down	no	-0.252147	3.22225e-05	down	no	-0.0802335	0.335924	down	no	Gene.262::PuPacbio_f3p22_4425_transcript219_g1::g.262::m.262	341-4222[+]	gi|566188489|ref|XM_002314297.2|	7125	E:0	Populus trichocarpa hypothetical protein (POPTR_0010s00540g) mRNA, complete cds	gi|566188490|ref|XP_002314333.2|	2345	E:0	hypothetical protein POPTR_0010s00540g [Populus trichocarpa]	AB21B_ARATH	1612	E:0	RecName: Full=ABC transporter B family member 21;^Eukaryota; Viridiplantae; Streptophyta; Embryophyta; Tracheophyta; Spermatophyta; Magnoliophyta; eudicotyledons; Gunneridae; Pentapetalae; rosids; malvids; Brassicales; Brassicaceae; Camelineae; Arabidopsis	AB4B_ARATH	1770	E:0	RecName: Full=ABC transporter B family member 4;^Eukaryota; Viridiplantae; Streptophyta; Embryophyta; Tracheophyta; Spermatophyta; Magnoliophyta; eudicotyledons; Gunneridae; Pentapetalae; rosids; malvids; Brassicales; Brassicaceae; Camelineae; Arabidopsis	PF00664.22	ABC_membrane	ABC transporter transmembrane region	COG1132	(ABC) transporter	.	ExpAA=232.86^PredHel=9^Topology=i60-82o112-134i185-204o209-231i288-310o725-747i767-785o861-883i948-970o	.	GO:0010315|auxin efflux;GO:0060919|auxin influx;GO:0009926|auxin polar transport;GO:0009734|auxin-activated signaling pathway;GO:0010540|basipetal auxin transport;GO:0009630|gravitropism;GO:0009733|response to auxin;GO:0009735|response to cytokinin;GO:0048767|root hair elongationGO:0006810|transport;GO:0055085|transmembrane transport	GO:0005524|ATP binding;GO:0010329|auxin efflux transmembrane transporter activity;GO:0010328|auxin influx transmembrane transporter activity;GO:0008559|xenobiotic-transporting ATPase activityGO:0005524|ATP binding;GO:0042626|ATPase activity, coupled to transmembrane movement of substances;GO:0016887|ATPase activity	GO:0016021|integral component of membrane;GO:0016020|membrane;GO:0005886|plasma membrane;GO:0009506|plasmodesmaGO:0016021|integral component of membrane
f2p60_3154_19010	1.00196	0.051088	up	no	3.81386	9.52742e-28	up	yes	0.727999	0.0647948	up	no	1.67064	2.51597e-07	up	yes	1.34323	4.47313e-05	up	yes	Gene.8828::PuPacbio_f2p60_3154_transcript19010_g1::g.8828::m.8828	485-2719[+]	gi|743898499|ref|XM_011044238.1|	4959	E:0	PREDICTED: Populus euphratica ABC transporter G family member 22 (LOC105138201), transcript variant X4, mRNA	gi|224138238|ref|XP_002322764.1|	1382	E:0	ABC transporter family protein [Populus trichocarpa]	AB22G_ARATH	1097	E:0	RecName: Full=ABC transporter G family member 22;^Eukaryota; Viridiplantae; Streptophyta; Embryophyta; Tracheophyta; Spermatophyta; Magnoliophyta; eudicotyledons; Gunneridae; Pentapetalae; rosids; malvids; Brassicales; Brassicaceae; Camelineae; Arabidopsis	AB22G_ARATH	1194	E:0	RecName: Full=ABC transporter G family member 22;^Eukaryota; Viridiplantae; Streptophyta; Embryophyta; Tracheophyta; Spermatophyta; Magnoliophyta; eudicotyledons; Gunneridae; Pentapetalae; rosids; malvids; Brassicales; Brassicaceae; Camelineae; Arabidopsis	PF00005.26	ABC_tran	ABC transporter	COG1131	(ABC) transporter	.	ExpAA=135.49^PredHel=6^Topology=i509-528o543-565i586-608o623-645i657-679o710-732i	.	GO:0009414|response to water deprivation;GO:0010148|transpiration	GO:0005524|ATP binding;GO:0042626|ATPase activity, coupled to transmembrane movement of substancesGO:0005524|ATP binding;GO:0016887|ATPase activity	GO:0016021|integral component of membrane;GO:0005886|plasma membraneGO:0016020|membrane
f2p39_3699_691	0.988161	0.0498575	up	no	4.12736	6.65265e-17	up	yes	1.05785	0.00311668	up	no	1.17505	0.000161022	up	yes	0.966978	0.00100869	up	no	Gene.700::PuPacbio_f2p39_3699_transcript691_g1::g.700::m.700	493-1185[+]	gi|566177424|ref|XM_006381865.1|	2780	E:0	Populus trichocarpa hypothetical protein (POPTR_0006s21400g) mRNA, complete cds	gi|743898502|ref|XP_011042541.1|	900	E:0	PREDICTED: ABC transporter G family member 22 isoform X2 [Populus euphratica]	AB22G_ARATH	768	E:0	RecName: Full=ABC transporter G family member 22;^Eukaryota; Viridiplantae; Streptophyta; Embryophyta; Tracheophyta; Spermatophyta; Magnoliophyta; eudicotyledons; Gunneridae; Pentapetalae; rosids; malvids; Brassicales; Brassicaceae; Camelineae; Arabidopsis	AB22G_ARATH	286	E:1e-89	RecName: Full=ABC transporter G family member 22;^Eukaryota; Viridiplantae; Streptophyta; Embryophyta; Tracheophyta; Spermatophyta; Magnoliophyta; eudicotyledons; Gunneridae; Pentapetalae; rosids; malvids; Brassicales; Brassicaceae; Camelineae; Arabidopsis	PF00005.26	ABC_tran	ABC transporter	COG1131	(ABC) transporter	.	.	.	GO:0009414|response to water deprivation;GO:0010148|transpiration	GO:0005524|ATP binding;GO:0042626|ATPase activity, coupled to transmembrane movement of substancesGO:0005524|ATP binding;GO:0016887|ATPase activity	GO:0016021|integral component of membrane;GO:0005886|plasma membrane
f3p42_3136_1465	-1.51355	1.00129e-116	down	yes	-1.31342	1.66052e-103	down	yes	-1.57538	5.25365e-95	down	yes	-1.16232	1.00022e-57	down	yes	-1.07129	1.0277e-15	down	yes	Gene.1345::PuPacbio_f3p42_3136_transcript1465_g1::g.1345::m.1345	2-2944[+]	gi|743907468|ref|XM_011048859.1|	5131	E:0	PREDICTED: Populus euphratica ABC transporter A family member 2 (LOC105141596), mRNA	gi|743907469|ref|XP_011047161.1|	1858	E:0	PREDICTED: ABC transporter A family member 2 [Populus euphratica]	AB2A_ARATH	1288	E:0	RecName: Full=ABC transporter A family member 2;^Eukaryota; Viridiplantae; Streptophyta; Embryophyta; Tracheophyta; Spermatophyta; Magnoliophyta; eudicotyledons; Gunneridae; Pentapetalae; rosids; malvids; Brassicales; Brassicaceae; Camelineae; Arabidopsis	AB2A_ARATH	1360	E:0	RecName: Full=ABC transporter A family member 2;^Eukaryota; Viridiplantae; Streptophyta; Embryophyta; Tracheophyta; Spermatophyta; Magnoliophyta; eudicotyledons; Gunneridae; Pentapetalae; rosids; malvids; Brassicales; Brassicaceae; Camelineae; Arabidopsis	PF12698.6	ABC2_membrane_3	ABC-2 family transporter protein	ENOG410XXUP	(ABC) transporter	.	ExpAA=138.64^PredHel=7^Topology=i13-27o42-59i237-259o279-301i314-336o346-368i431-453o	.	GO:0006869|lipid transport	GO:0005524|ATP binding;GO:0042626|ATPase activity, coupled to transmembrane movement of substances;GO:0005215|transporter activityGO:0005524|ATP binding;GO:0016887|ATPase activity	GO:0016021|integral component of membrane;GO:0043231|intracellular membrane-bounded organelle
f2p30_3242_1275	1.34036	9.6233e-60	up	yes	1.22679	3.07625e-59	up	yes	0.748771	5.35093e-17	up	no	0.33876	0.0339348	up	no	-0.246889	0.443909	down	no	Gene.1190::PuPacbio_f2p30_3242_transcript1275_g1::g.1190::m.1190	201-2981[+]	gi|566197198|ref|XM_002317952.2|	5644	E:0	Populus trichocarpa ABC transporter family protein (POPTR_0012s07160g) mRNA, complete cds	gi|566197199|ref|XP_002317988.2|	1783	E:0	ABC transporter family protein [Populus trichocarpa]	AB2A_ARATH	1208	E:0	RecName: Full=ABC transporter A family member 2;^Eukaryota; Viridiplantae; Streptophyta; Embryophyta; Tracheophyta; Spermatophyta; Magnoliophyta; eudicotyledons; Gunneridae; Pentapetalae; rosids; malvids; Brassicales; Brassicaceae; Camelineae; Arabidopsis	AB2A_ARATH	1303	E:0	RecName: Full=ABC transporter A family member 2;^Eukaryota; Viridiplantae; Streptophyta; Embryophyta; Tracheophyta; Spermatophyta; Magnoliophyta; eudicotyledons; Gunneridae; Pentapetalae; rosids; malvids; Brassicales; Brassicaceae; Camelineae; Arabidopsis	PF12698.6	ABC2_membrane_3	ABC-2 family transporter protein	ENOG410XXUP	(ABC) transporter	.	ExpAA=129.94^PredHel=6^Topology=o185-207i228-250o265-287i294-316o326-345i379-401o	.	GO:0006869|lipid transport	GO:0005524|ATP binding;GO:0042626|ATPase activity, coupled to transmembrane movement of substances;GO:0005215|transporter activityGO:0005524|ATP binding;GO:0016887|ATPase activity	GO:0016021|integral component of membrane;GO:0043231|intracellular membrane-bounded organelle
f2p47_4852_110	-1.67557	1.62679e-27	down	yes	-0.723625	7.63859e-10	down	no	-0.30278	0.00753652	down	no	-0.370434	NA	down	no	-1.4351	3.22005e-14	down	yes	Gene.143::PuPacbio_f2p47_4852_transcript110_g1::g.143::m.143	250-4512[+]	gi|566214499|ref|XM_002324923.2|	8720	E:0	Populus trichocarpa ABC transporter family protein (POPTR_0018s06370g) mRNA, complete cds	gi|566214500|ref|XP_002324959.2|	2805	E:0	ABC transporter family protein [Populus trichocarpa]	AB32G_ARATH	2295	E:0	RecName: Full=ABC transporter G family member 32 {ECO:0000303|PubMed:18299247};^Eukaryota; Viridiplantae; Streptophyta; Embryophyta; Tracheophyta; Spermatophyta; Magnoliophyta; eudicotyledons; Gunneridae; Pentapetalae; rosids; malvids; Brassicales; Brassicaceae; Camelineae; Arabidopsis	AB32G_ARATH	2386	E:0	RecName: Full=ABC transporter G family member 32 {ECO:0000303|PubMed:18299247};^Eukaryota; Viridiplantae; Streptophyta; Embryophyta; Tracheophyta; Spermatophyta; Magnoliophyta; eudicotyledons; Gunneridae; Pentapetalae; rosids; malvids; Brassicales; Brassicaceae; Camelineae; Arabidopsis	PF14510.5	ABC_trans_N	ABC-transporter extracellular N-terminal	COG0842	(ABC) transporter	.	ExpAA=298.35^PredHel=13^Topology=o503-525i537-559o588-610i623-642o647-669i732-754o1164-1186i1199-1221o1241-1263i1275-1297o1307-1329i1336-1358o1390-1412i	.	GO:0042335|cuticle development;GO:0006855|drug transmembrane transport	GO:0005524|ATP binding;GO:0042626|ATPase activity, coupled to transmembrane movement of substancesGO:0005524|ATP binding;GO:0016887|ATPase activity	GO:0016021|integral component of membrane;GO:0005886|plasma membraneGO:0016020|membrane
f3p44_2143_3768	-1.66343	2.71738e-11	down	yes	-0.798726	8.25637e-05	down	no	0.588985	0.000222327	up	no	0.647627	0.000215576	up	no	0.633909	0.00265679	up	no	Gene.2867::PuPacbio_f3p44_2143_transcript3768_g1::g.2867::m.2867	1-1965[+]	gi|164663922|gb|AC216598.1|	3832	E:0	Populus trichocarpa clone POP037-D13, complete sequence	gi|566179550|ref|XP_002309921.2|	1286	E:0	hypothetical protein POPTR_0007s04270g [Populus trichocarpa]	AB5G_ARATH	937	E:0	RecName: Full=ABC transporter G family member 5;^Eukaryota; Viridiplantae; Streptophyta; Embryophyta; Tracheophyta; Spermatophyta; Magnoliophyta; eudicotyledons; Gunneridae; Pentapetalae; rosids; malvids; Brassicales; Brassicaceae; Camelineae; Arabidopsis	AB5G_ARATH	949	E:0	RecName: Full=ABC transporter G family member 5;^Eukaryota; Viridiplantae; Streptophyta; Embryophyta; Tracheophyta; Spermatophyta; Magnoliophyta; eudicotyledons; Gunneridae; Pentapetalae; rosids; malvids; Brassicales; Brassicaceae; Camelineae; Arabidopsis	PF00005.26	ABC_tran	ABC transporter	COG1131	(ABC) transporter	.	ExpAA=139.34^PredHel=6^Topology=i393-415o426-448i469-491o501-523i532-554o620-642i	.	.	GO:0005524|ATP binding;GO:0042626|ATPase activity, coupled to transmembrane movement of substancesGO:0005524|ATP binding;GO:0016887|ATPase activity	GO:0016021|integral component of membrane;GO:0005886|plasma membraneGO:0016020|membrane
f2p38_3130_19064	-1.41352	6.15371e-92	down	yes	-1.20189	4.97462e-96	down	yes	-1.52063	2.82279e-106	down	yes	-1.18695	4.25841e-70	down	yes	-1.0656	4.92508e-12	down	yes	Gene.8865::PuPacbio_f2p38_3130_transcript19064_g1::g.8865::m.8865	129-1253[+]	gi|743907470|ref|XM_011048860.1|	5162	E:0	PREDICTED: Populus euphratica ABC transporter A family member 7-like (LOC105141597), mRNA	gi|566206441|ref|XP_006374477.1|	1099	E:0	ABC transporter family protein [Populus trichocarpa]	AB7A_ARATH	810	E:0	RecName: Full=ABC transporter A family member 7;^Eukaryota; Viridiplantae; Streptophyta; Embryophyta; Tracheophyta; Spermatophyta; Magnoliophyta; eudicotyledons; Gunneridae; Pentapetalae; rosids; malvids; Brassicales; Brassicaceae; Camelineae; Arabidopsis	AB3A_ARATH	342	E:2e-107	RecName: Full=ABC transporter A family member 3;^Eukaryota; Viridiplantae; Streptophyta; Embryophyta; Tracheophyta; Spermatophyta; Magnoliophyta; eudicotyledons; Gunneridae; Pentapetalae; rosids; malvids; Brassicales; Brassicaceae; Camelineae; Arabidopsis	.	.	.	COG1131	(ABC) transporter	.	ExpAA=42.16^PredHel=2^Topology=i34-56o343-365i	.	GO:0006869|lipid transport	GO:0005524|ATP binding;GO:0042626|ATPase activity, coupled to transmembrane movement of substances;GO:0005215|transporter activity	GO:0016021|integral component of membrane;GO:0043231|intracellular membrane-bounded organelle
f7p60_892_12070	0.214237	0.455956	up	no	1.31095	8.2562e-09	up	yes	0.842867	0.00059322	up	no	1.27052	1.19183e-07	up	yes	1.24632	NA	up	no	Gene.6645::PuPacbio_f7p60_892_transcript12070_g1::g.6645::m.6645	2-721[+]	gi|566188238|ref|XM_002313587.2|	1526	E:0	Populus trichocarpa forkhead-associated domain-containing family protein (POPTR_0009s15870g) mRNA, complete cds	gi|566188239|ref|XP_002313623.2|	415	E:3e-144	forkhead-associated domain-containing family protein [Populus trichocarpa]	ABA2_SOLLC	51.2	E:6e-06	RecName: Full=Zeaxanthin epoxidase, chloroplastic;^Eukaryota; Viridiplantae; Streptophyta; Embryophyta; Tracheophyta; Spermatophyta; Magnoliophyta; eudicotyledons; Gunneridae; Pentapetalae; asterids; lamiids; Solanales; Solanaceae; Solanoideae; Solaneae; Solanum; Lycopersicon	ABA2_NICPL	57	E:4e-08	RecName: Full=Zeaxanthin epoxidase, chloroplastic;^Eukaryota; Viridiplantae; Streptophyta; Embryophyta; Tracheophyta; Spermatophyta; Magnoliophyta; eudicotyledons; Gunneridae; Pentapetalae; asterids; lamiids; Solanales; Solanaceae; Nicotianoideae; Nicotianeae; Nicotiana	PF16697.4	Yop-YscD_cpl	Inner membrane component of T3SS, cytoplasmic domain	.	.	.	.	.	GO:0009688|abscisic acid biosynthetic process	GO:0071949|FAD binding;GO:0009540|zeaxanthin epoxidase [overall] activityGO:0005515|protein binding	GO:0031969|chloroplast membrane;GO:0009535|chloroplast thylakoid membrane
f4p60_2036_4219	-0.838665	6.97874e-10	down	no	-1.46483	1.62125e-33	down	yes	-0.900516	3.2496e-14	down	no	-1.50446	1.13935e-19	down	yes	-1.25219	3.65896e-24	down	yes	Gene.3145::PuPacbio_f4p60_2036_transcript4219_g1::g.3145::m.3145	59-1474[+]	gi|566168459|ref|XM_006385093.1|	3542	E:0	Populus trichocarpa cytochrome P450 family protein (POPTR_0004s24360g) mRNA, complete cds	gi|743849533|ref|XP_011028493.1|	923	E:0	PREDICTED: abscisic acid 8'-hydroxylase 1 [Populus euphratica]	ABAH1_ARATH	777	E:0	RecName: Full=Abscisic acid 8'-hydroxylase 1;^Eukaryota; Viridiplantae; Streptophyta; Embryophyta; Tracheophyta; Spermatophyta; Magnoliophyta; eudicotyledons; Gunneridae; Pentapetalae; rosids; malvids; Brassicales; Brassicaceae; Camelineae; Arabidopsis	ABAH1_ARATH	784	E:0	RecName: Full=Abscisic acid 8'-hydroxylase 1;^Eukaryota; Viridiplantae; Streptophyta; Embryophyta; Tracheophyta; Spermatophyta; Magnoliophyta; eudicotyledons; Gunneridae; Pentapetalae; rosids; malvids; Brassicales; Brassicaceae; Camelineae; Arabidopsis	PF00067.21	p450	Cytochrome P450	.	.	.	ExpAA=19.34^PredHel=1^Topology=i7-24o	.	GO:0046345|abscisic acid catabolic process;GO:0016132|brassinosteroid biosynthetic process;GO:0010268|brassinosteroid homeostasis;GO:0016125|sterol metabolic processGO:0055114|oxidation-reduction process	GO:0010295|(+)-abscisic acid 8'-hydroxylase activity;GO:0020037|heme binding;GO:0005506|iron ion bindingGO:0005506|iron ion binding;GO:0016705|oxidoreductase activity, acting on paired donors, with incorporation or reduction of molecular oxygen;GO:0020037|heme binding	GO:0016021|integral component of membrane
f2p59_983_11096	2.83442	1.18339e-15	up	yes	3.97306	1.09864e-43	up	yes	1.66093	7.81549e-07	up	yes	0.348423	0.12386	up	no	0.1374	0.655686	up	no	Gene.6296::PuPacbio_f2p59_983_transcript11096_g1::g.6296::m.6296	3-662[+]	gi|566176412|ref|XM_006381570.1|	1735	E:0	Populus trichocarpa hypothetical protein (POPTR_0006s14510g) mRNA, complete cds	gi|566176413|ref|XP_006381632.1|	381	E:9e-130	hypothetical protein POPTR_0006s14510g [Populus trichocarpa]	ABP20_PRUPE	281	E:1e-92	RecName: Full=Auxin-binding protein ABP20;^Eukaryota; Viridiplantae; Streptophyta; Embryophyta; Tracheophyta; Spermatophyta; Magnoliophyta; eudicotyledons; Gunneridae; Pentapetalae; rosids; fabids; Rosales; Rosaceae; Maloideae; Amygdaleae; Prunus	ABP20_PRUPE	316	E:5e-108	RecName: Full=Auxin-binding protein ABP20;^Eukaryota; Viridiplantae; Streptophyta; Embryophyta; Tracheophyta; Spermatophyta; Magnoliophyta; eudicotyledons; Gunneridae; Pentapetalae; rosids; fabids; Rosales; Rosaceae; Maloideae; Amygdaleae; Prunus	PF00190.21	Cupin_1	Cupin	.	.	.	.	.	GO:0009734|auxin-activated signaling pathway	GO:0030145|manganese ion binding;GO:0045735|nutrient reservoir activityGO:0045735|nutrient reservoir activity	GO:0048046|apoplast;GO:0005618|cell wall
f2p57_4009_433	2.29238	7.13167e-140	up	yes	1.24325	2.87142e-44	up	yes	0.639769	1.18911e-09	up	no	0.553236	5.41356e-08	up	no	0.492756	1.45616e-06	up	no	Gene.505::PuPacbio_f2p57_4009_transcript433_g1::g.505::m.505	344-3631[+]	gi|743805705|ref|XM_011019402.1|	6708	E:0	PREDICTED: Populus euphratica calcium-transporting ATPase 10, plasma membrane-type-like (LOC105120955), transcript variant X1, mRNA	gi|743805708|ref|XP_011017705.1|	2083	E:0	PREDICTED: calcium-transporting ATPase 10, plasma membrane-type-like isoform X2 [Populus euphratica]	ACA10_ARATH	1570	E:0	RecName: Full=Calcium-transporting ATPase 10, plasma membrane-type;^Eukaryota; Viridiplantae; Streptophyta; Embryophyta; Tracheophyta; Spermatophyta; Magnoliophyta; eudicotyledons; Gunneridae; Pentapetalae; rosids; malvids; Brassicales; Brassicaceae; Camelineae; Arabidopsis	ACA10_ARATH	1617	E:0	RecName: Full=Calcium-transporting ATPase 10, plasma membrane-type;^Eukaryota; Viridiplantae; Streptophyta; Embryophyta; Tracheophyta; Spermatophyta; Magnoliophyta; eudicotyledons; Gunneridae; Pentapetalae; rosids; malvids; Brassicales; Brassicaceae; Camelineae; Arabidopsis	PF12515.7	CaATP_NAI	Ca2+-ATPase N terminal autoinhibitory domain	ENOG410XNNC	ATPase, Ca transporting, plasma membrane	.	ExpAA=149.79^PredHel=6^Topology=o194-216i229-246o378-400i433-455o1002-1024i1037-1059o	.	.	GO:0005524|ATP binding;GO:0005388|calcium-transporting ATPase activity;GO:0005516|calmodulin binding;GO:0046872|metal ion bindingGO:0005516|calmodulin binding	GO:0005887|integral component of plasma membrane;GO:0043231|intracellular membrane-bounded organelle;GO:0005886|plasma membrane;GO:0009506|plasmodesma
f2p20_3494_18605	0.934374	2.8404e-15	up	no	0.734069	4.11217e-10	up	no	-0.258436	0.0680963	down	no	-0.431791	0.0602657	down	no	-1.29547	9.14924e-08	down	yes	Gene.8519::PuPacbio_f2p20_3494_transcript18605_g1::g.8519::m.8519	196-3252[+]	gi|549445022|gb|KC344828.1|	6028	E:0	Populus tomentosa ACA13 gene, complete cds	gi|743786277|ref|XP_011027295.1|	1874	E:0	PREDICTED: putative calcium-transporting ATPase 13, plasma membrane-type [Populus euphratica]	ACA13_ARATH	1347	E:0	RecName: Full=Putative calcium-transporting ATPase 13, plasma membrane-type;^Eukaryota; Viridiplantae; Streptophyta; Embryophyta; Tracheophyta; Spermatophyta; Magnoliophyta; eudicotyledons; Gunneridae; Pentapetalae; rosids; malvids; Brassicales; Brassicaceae; Camelineae; Arabidopsis	ACA13_ARATH	1399	E:0	RecName: Full=Putative calcium-transporting ATPase 13, plasma membrane-type;^Eukaryota; Viridiplantae; Streptophyta; Embryophyta; Tracheophyta; Spermatophyta; Magnoliophyta; eudicotyledons; Gunneridae; Pentapetalae; rosids; malvids; Brassicales; Brassicaceae; Camelineae; Arabidopsis	PF00690.25	Cation_ATPase_N	Cation transporter/ATPase, N-terminus	ENOG410XNNC	ATPase, Ca transporting, plasma membrane	.	ExpAA=172.98^PredHel=8^Topology=i143-165o180-202i338-360o388-410i808-830o835-857i949-966o981-1000i	.	.	GO:0005524|ATP binding;GO:0005388|calcium-transporting ATPase activity;GO:0005516|calmodulin binding;GO:0046872|metal ion binding	GO:0005887|integral component of plasma membrane;GO:0043231|intracellular membrane-bounded organelle
f2p45_2507_2796	1.2907	1.70265e-51	up	yes	0.601113	5.66145e-12	up	no	0.712922	3.65252e-13	up	no	0.322972	0.00747048	up	no	0.289835	0.0429484	up	no	Gene.2293::PuPacbio_f2p45_2507_transcript2796_g1::g.2293::m.2293	165-2192[+]	gi|566198909|ref|XM_006375687.1|	4340	E:0	Populus trichocarpa hypothetical protein (POPTR_0013s01950g) mRNA, complete cds	gi|566198910|ref|XP_006375749.1|	1267	E:0	hypothetical protein POPTR_0013s01950g [Populus trichocarpa]	ACBP4_ARATH	981	E:0	RecName: Full=Acyl-CoA-binding domain-containing protein 4;^Eukaryota; Viridiplantae; Streptophyta; Embryophyta; Tracheophyta; Spermatophyta; Magnoliophyta; eudicotyledons; Gunneridae; Pentapetalae; rosids; malvids; Brassicales; Brassicaceae; Camelineae; Arabidopsis	ACBP4_ARATH	1069	E:0	RecName: Full=Acyl-CoA-binding domain-containing protein 4;^Eukaryota; Viridiplantae; Streptophyta; Embryophyta; Tracheophyta; Spermatophyta; Magnoliophyta; eudicotyledons; Gunneridae; Pentapetalae; rosids; malvids; Brassicales; Brassicaceae; Camelineae; Arabidopsis	PF00887.18	ACBP	Acyl CoA binding protein	ENOG410Y5WM	Kelch domain containing	.	.	.	GO:0006869|lipid transport;GO:0009723|response to ethylene;GO:0009753|response to jasmonic acid;GO:0009416|response to light stimulus	GO:0000062|fatty-acyl-CoA binding;GO:0008289|lipid bindingGO:0000062|fatty-acyl-CoA binding;GO:0005515|protein binding	GO:0005737|cytoplasm;GO:0005829|cytosol;GO:0005634|nucleus
f5p60_1401_7689	2.46624	2.36231e-30	up	yes	2.32915	7.6757e-30	up	yes	2.21338	1.20408e-27	up	yes	1.56139	4.82611e-13	up	yes	2.70743	7.076e-51	up	yes	Gene.4882::PuPacbio_f5p60_1401_transcript7689_g1::g.4882::m.4882	97-1053[+]	gi|566193001|ref|XM_002316553.2|	2468	E:0	Populus trichocarpa aminocyclopropane carboxylate oxidase family protein (POPTR_0011s00970g) mRNA, complete cds	gi|224113841|ref|XP_002316589.1|	613	E:0	aminocyclopropane carboxylate oxidase family protein [Populus trichocarpa]	ACCO_ACTDE	539	E:0	RecName: Full=1-aminocyclopropane-1-carboxylate oxidase;^Eukaryota; Viridiplantae; Streptophyta; Embryophyta; Tracheophyta; Spermatophyta; Magnoliophyta; eudicotyledons; Gunneridae; Pentapetalae; asterids; Ericales; Actinidiaceae; Actinidia	ACCO_ACTDE	580	E:0	RecName: Full=1-aminocyclopropane-1-carboxylate oxidase;^Eukaryota; Viridiplantae; Streptophyta; Embryophyta; Tracheophyta; Spermatophyta; Magnoliophyta; eudicotyledons; Gunneridae; Pentapetalae; asterids; Ericales; Actinidiaceae; Actinidia	PF14226.5	DIOX_N	non-haem dioxygenase in morphine synthesis N-terminal	.	.	.	.	.	GO:0009693|ethylene biosynthetic process;GO:0009835|fruit ripeningGO:0055114|oxidation-reduction process	GO:0009815|1-aminocyclopropane-1-carboxylate oxidase activity;GO:0031418|L-ascorbic acid binding;GO:0046872|metal ion bindingGO:0016491|oxidoreductase activity	.
f2p51_1479_7181	0.891023	1.40214e-38	up	no	0.315413	2.97081e-05	up	no	-0.455815	1.97711e-07	down	no	-1.31694	4.94736e-47	down	yes	-0.130253	0.286401	down	no	Gene.4652::PuPacbio_f2p51_1479_transcript7181_g1::g.4652::m.4652	90-1046[+]	gi|566164160|ref|XM_006383779.1|	2459	E:0	Populus trichocarpa aminocyclopropane carboxylate oxidase family protein (POPTR_0004s00460g) mRNA, complete cds	gi|566164161|ref|XP_006383841.1|	603	E:0	aminocyclopropane carboxylate oxidase family protein [Populus trichocarpa]	ACCO_ACTDE	528	E:0	RecName: Full=1-aminocyclopropane-1-carboxylate oxidase;^Eukaryota; Viridiplantae; Streptophyta; Embryophyta; Tracheophyta; Spermatophyta; Magnoliophyta; eudicotyledons; Gunneridae; Pentapetalae; asterids; Ericales; Actinidiaceae; Actinidia	ACCO_ACTDE	576	E:0	RecName: Full=1-aminocyclopropane-1-carboxylate oxidase;^Eukaryota; Viridiplantae; Streptophyta; Embryophyta; Tracheophyta; Spermatophyta; Magnoliophyta; eudicotyledons; Gunneridae; Pentapetalae; asterids; Ericales; Actinidiaceae; Actinidia	PF14226.5	DIOX_N	non-haem dioxygenase in morphine synthesis N-terminal	.	.	.	.	.	GO:0009693|ethylene biosynthetic process;GO:0009835|fruit ripeningGO:0055114|oxidation-reduction process	GO:0009815|1-aminocyclopropane-1-carboxylate oxidase activity;GO:0031418|L-ascorbic acid binding;GO:0046872|metal ion bindingGO:0016491|oxidoreductase activity	.
f2p53_1118_9998	-0.73441	1.183e-08	down	no	-1.34137	3.90245e-24	down	yes	0.524774	7.18262e-07	up	no	-1.16316	0.000510479	down	yes	-2.46668	3.05082e-50	down	yes	Gene.5874::PuPacbio_f2p53_1118_transcript9998_g1::g.5874::m.5874	46-957[+]	gi|566176580|ref|XM_002309191.2|	1881	E:0	Populus trichocarpa 1-aminocyclopropane-1-carboxylate oxidase family protein (POPTR_0006s15610g) mRNA, complete cds	gi|224091345|ref|XP_002309227.1|	627	E:0	1-aminocyclopropane-1-carboxylate oxidase family protein [Populus trichocarpa]	ACCO1_ARATH	463	E:8e-162	RecName: Full=1-aminocyclopropane-1-carboxylate oxidase 1;^Eukaryota; Viridiplantae; Streptophyta; Embryophyta; Tracheophyta; Spermatophyta; Magnoliophyta; eudicotyledons; Gunneridae; Pentapetalae; rosids; malvids; Brassicales; Brassicaceae; Camelineae; Arabidopsis	ACCO1_ARATH	462	E:1e-162	RecName: Full=1-aminocyclopropane-1-carboxylate oxidase 1;^Eukaryota; Viridiplantae; Streptophyta; Embryophyta; Tracheophyta; Spermatophyta; Magnoliophyta; eudicotyledons; Gunneridae; Pentapetalae; rosids; malvids; Brassicales; Brassicaceae; Camelineae; Arabidopsis	PF14226.5	DIOX_N	non-haem dioxygenase in morphine synthesis N-terminal	COG3491	2OGFe(II) oxygenase	.	.	.	GO:0071398|cellular response to fatty acid;GO:0071281|cellular response to iron ion;GO:0071732|cellular response to nitric oxide;GO:0051365|cellular response to potassium ion starvation;GO:0006952|defense response;GO:0009693|ethylene biosynthetic processGO:0055114|oxidation-reduction process	GO:0009815|1-aminocyclopropane-1-carboxylate oxidase activity;GO:0031418|L-ascorbic acid binding;GO:0046872|metal ion bindingGO:0016491|oxidoreductase activity	.
f3p60_2689_19927	-1.03764	4.55105e-09	down	yes	-1.06748	6.43292e-11	down	yes	-0.668724	2.24702e-05	down	no	-0.408939	0.00435931	down	no	-0.205437	0.138384	down	no	Gene.9438::PuPacbio_f3p60_2689_transcript19927_g1::g.9438::m.9438	579-2477[+]	gi|566214438|ref|XM_006371847.1|	2826	E:0	Populus trichocarpa hypothetical protein (POPTR_0018s06020g) mRNA, complete cds	gi|566214439|ref|XP_006371909.1|	1030	E:0	hypothetical protein POPTR_0018s06020g [Populus trichocarpa]	ACD6_ARATH	100	E:2e-20	RecName: Full=Protein ACCELERATED CELL DEATH 6 {ECO:0000303|PubMed:10488236};^Eukaryota; Viridiplantae; Streptophyta; Embryophyta; Tracheophyta; Spermatophyta; Magnoliophyta; eudicotyledons; Gunneridae; Pentapetalae; rosids; malvids; Brassicales; Brassicaceae; Camelineae; Arabidopsis	ACD6_ARATH	115	E:2e-25	RecName: Full=Protein ACCELERATED CELL DEATH 6 {ECO:0000303|PubMed:10488236};^Eukaryota; Viridiplantae; Streptophyta; Embryophyta; Tracheophyta; Spermatophyta; Magnoliophyta; eudicotyledons; Gunneridae; Pentapetalae; rosids; malvids; Brassicales; Brassicaceae; Camelineae; Arabidopsis	PF12796.6	Ank_2	Ankyrin repeats (3 copies)	COG0666	Ankyrin Repeat	.	ExpAA=89.45^PredHel=4^Topology=i467-489o509-531i543-565o575-597i	.	GO:0008219|cell death;GO:0071446|cellular response to salicylic acid stimulus;GO:0009816|defense response to bacterium, incompatible interaction;GO:1900426|positive regulation of defense response to bacterium;GO:1902290|positive regulation of defense response to oomycetes;GO:0016567|protein ubiquitination;GO:1900150|regulation of defense response to fungus;GO:2000031|regulation of salicylic acid …	GO:0005515|protein binding	GO:0030176|integral component of endoplasmic reticulum membrane;GO:0005887|integral component of plasma membrane;GO:0016020|membrane
f7p60_1367_26061	1.10075	3.65796e-20	up	yes	0.57642	4.05885e-06	up	no	0.479978	0.000329126	up	no	0.606594	4.41535e-05	up	no	0.789293	3.53212e-10	up	no	Gene.13093::PuPacbio_f7p60_1367_transcript26061_g1::g.13093::m.13093	89-1156[+]	gi|566190031|ref|XM_002314669.2|	2357	E:0	Populus trichocarpa hypothetical protein (POPTR_0010s09940g) mRNA, complete cds	gi|566190032|ref|XP_002314705.2|	702	E:0	hypothetical protein POPTR_0010s09940g [Populus trichocarpa]	ACL5_ARATH	447	E:8e-154	RecName: Full=Thermospermine synthase ACAULIS5;^Eukaryota; Viridiplantae; Streptophyta; Embryophyta; Tracheophyta; Spermatophyta; Magnoliophyta; eudicotyledons; Gunneridae; Pentapetalae; rosids; malvids; Brassicales; Brassicaceae; Camelineae; Arabidopsis	ACL5_ARATH	448	E:6e-156	RecName: Full=Thermospermine synthase ACAULIS5;^Eukaryota; Viridiplantae; Streptophyta; Embryophyta; Tracheophyta; Spermatophyta; Magnoliophyta; eudicotyledons; Gunneridae; Pentapetalae; rosids; malvids; Brassicales; Brassicaceae; Camelineae; Arabidopsis	PF17284.1	Spermine_synt_N	Spermidine synthase tetramerisation domain	COG0421	Catalyzes the production of spermidine from putrescine and decarboxylated S-adenosylmethionine (dcSAM), which serves as an aminopropyl donor (By similarity)	.	.	.	GO:0009926|auxin polar transport;GO:0010087|phloem or xylem histogenesis;GO:0006596|polyamine biosynthetic process;GO:0048759|xylem vessel member cell differentiation	GO:0016768|spermine synthase activity;GO:0010487|thermospermine synthase activity	GO:0005737|cytoplasm
f2p37_1837_4187	1.20941	2.17294e-11	up	yes	1.03377	1.37908e-09	up	yes	0.756742	0.000581408	up	no	0.309903	0.155256	up	no	-0.447777	0.0399265	down	no	Gene.3132::PuPacbio_f2p37_1837_transcript4187_g1::g.3132::m.3132	937-1386[+]	gi|566184863|ref|XM_002312650.2|	2985	E:0	Populus trichocarpa ATP citrate lyase b-subunit family protein (POPTR_0008s19320g) mRNA, complete cds	gi|224102459|ref|XP_002312686.1|	526	E:0	ATP citrate lyase b-subunit family protein [Populus trichocarpa]	ACLA2_ARATH	460	E:0	RecName: Full=ATP-citrate synthase alpha chain protein 2;^Eukaryota; Viridiplantae; Streptophyta; Embryophyta; Tracheophyta; Spermatophyta; Magnoliophyta; eudicotyledons; Gunneridae; Pentapetalae; rosids; malvids; Brassicales; Brassicaceae; Camelineae; Arabidopsis	ACLA2_ARATH	279	E:9e-92	RecName: Full=ATP-citrate synthase alpha chain protein 2;^Eukaryota; Viridiplantae; Streptophyta; Embryophyta; Tracheophyta; Spermatophyta; Magnoliophyta; eudicotyledons; Gunneridae; Pentapetalae; rosids; malvids; Brassicales; Brassicaceae; Camelineae; Arabidopsis	PF16114.4	Citrate_bind	ATP citrate lyase citrate-binding	COG0045	Succinyl-CoA synthetase subunit beta	.	.	.	GO:0006085|acetyl-CoA biosynthetic process;GO:0006633|fatty acid biosynthetic process	GO:0005524|ATP binding;GO:0003878|ATP citrate synthase activity	GO:0009346|citrate lyase complex;GO:0005829|cytosol
f2p39_1785_5424	1.04136	3.00082e-74	up	yes	0.714462	5.47723e-36	up	no	0.666219	9.27277e-25	up	no	0.179518	0.0999195	up	no	0.209116	0.153031	up	no	Gene.3782::PuPacbio_f2p39_1785_transcript5424_g1::g.3782::m.3782	208-1479[+]	gi|566198671|ref|XM_002319430.2|	3131	E:0	Populus trichocarpa subunit A of the heteromeric enzyme ATP citrate lyase family protein (POPTR_0013s00580g) mRNA, complete cds	gi|566198672|ref|XP_002319466.2|	866	E:0	subunit A of the heteromeric enzyme ATP citrate lyase family protein [Populus trichocarpa]	ACLA2_ORYSJ	800	E:0	RecName: Full=ATP-citrate synthase alpha chain protein 2;^Eukaryota; Viridiplantae; Streptophyta; Embryophyta; Tracheophyta; Spermatophyta; Magnoliophyta; Liliopsida; Poales; Poaceae; BOP clade; Oryzoideae; Oryzeae; Oryzinae; Oryza	ACLA2_ORYSJ	800	E:0	RecName: Full=ATP-citrate synthase alpha chain protein 2;^Eukaryota; Viridiplantae; Streptophyta; Embryophyta; Tracheophyta; Spermatophyta; Magnoliophyta; Liliopsida; Poales; Poaceae; BOP clade; Oryzoideae; Oryzeae; Oryzinae; Oryza	PF08442.9	ATP-grasp_2	ATP-grasp domain	COG0045	Succinyl-CoA synthetase subunit beta	.	.	.	GO:0006085|acetyl-CoA biosynthetic process;GO:0006633|fatty acid biosynthetic process	GO:0005524|ATP binding;GO:0003878|ATP citrate synthase activity	GO:0009346|citrate lyase complex;GO:0005829|cytosol
f2p60_827_32120	-0.349731	0.406458	down	no	1.30961	2.94163e-05	up	yes	1.38624	1.33834e-06	up	yes	1.16782	4.19357e-05	up	yes	1.43293	6.77111e-08	up	yes	Gene.15675::PuPacbio_f2p60_827_transcript32120_g9::g.15675::m.15675	198-617[+]	gi|566207083|ref|XM_002321706.2|	1356	E:0	Populus trichocarpa hypothetical protein (POPTR_0015s11580g) mRNA, complete cds	gi|224134124|ref|XP_002321742.1|	272	E:2e-89	hypothetical protein POPTR_0015s11580g [Populus trichocarpa]	ACP1_CASGL	135	E:1e-37	RecName: Full=Acyl carrier protein 1, chloroplastic;^Eukaryota; Viridiplantae; Streptophyta; Embryophyta; Tracheophyta; Spermatophyta; Magnoliophyta; eudicotyledons; Gunneridae; Pentapetalae; rosids; fabids; Fagales; Casuarinaceae; Casuarina	ACP1_CASGL	135	E:2e-39	RecName: Full=Acyl carrier protein 1, chloroplastic;^Eukaryota; Viridiplantae; Streptophyta; Embryophyta; Tracheophyta; Spermatophyta; Magnoliophyta; eudicotyledons; Gunneridae; Pentapetalae; rosids; fabids; Fagales; Casuarinaceae; Casuarina	PF00550.24	PP-binding	Phosphopantetheine attachment site	.	.	.	.	.	GO:0006633|fatty acid biosynthetic process	GO:0031177|phosphopantetheine binding	GO:0009507|chloroplast
f3p60_711_33653	1.10704	3.20283e-26	up	yes	0.995915	1.32103e-22	up	no	0.878026	4.69647e-13	up	no	0.262337	0.0576971	up	no	0.129263	0.295136	up	no	Gene.16174::PuPacbio_f3p60_711_transcript33653_g3::g.16174::m.16174	2-496[+]	gi|566167146|ref|XM_002305474.2|	1173	E:0	Populus trichocarpa putative actin-depolymerizing factor family protein (POPTR_0004s17950g) mRNA, complete cds	gi|224078252|ref|XP_002305510.1|	298	E:3e-100	putative actin-depolymerizing factor family protein [Populus trichocarpa]	ADF5_ARATH	255	E:7e-85	RecName: Full=Actin-depolymerizing factor 5;^Eukaryota; Viridiplantae; Streptophyta; Embryophyta; Tracheophyta; Spermatophyta; Magnoliophyta; eudicotyledons; Gunneridae; Pentapetalae; rosids; malvids; Brassicales; Brassicaceae; Camelineae; Arabidopsis	ADF5_ARATH	255	E:4e-86	RecName: Full=Actin-depolymerizing factor 5;^Eukaryota; Viridiplantae; Streptophyta; Embryophyta; Tracheophyta; Spermatophyta; Magnoliophyta; eudicotyledons; Gunneridae; Pentapetalae; rosids; malvids; Brassicales; Brassicaceae; Camelineae; Arabidopsis	PF00241.19	Cofilin_ADF	Cofilin/tropomyosin-type actin-binding protein	ENOG41122P5	actin-depolymerizing factor	.	.	.	GO:0030042|actin filament depolymerization	GO:0003779|actin bindingGO:0003779|actin binding	GO:0015629|actin cytoskeleton;GO:0005737|cytoplasmGO:0005622|intracellular
f2p60_869_31612	0.56076	3.12957e-11	up	no	-0.24932	0.00545214	down	no	0.213333	0.0155244	up	no	-1.16508	2.9141e-07	down	yes	-1.9853	9.1404e-34	down	yes	Gene.15457::PuPacbio_f2p60_869_transcript31612_g7::g.15457::m.15457	2-667[+]	gi|118487635|gb|EF147634.1|	1454	E:0	Populus trichocarpa clone WS0123_P19 unknown mRNA	gi|566179489|ref|XP_002309900.2|	391	E:2e-132	hypothetical protein POPTR_0007s03910g [Populus trichocarpa]	ADH_MALDO	344	E:2e-115	RecName: Full=Alcohol dehydrogenase;^Eukaryota; Viridiplantae; Streptophyta; Embryophyta; Tracheophyta; Spermatophyta; Magnoliophyta; eudicotyledons; Gunneridae; Pentapetalae; rosids; fabids; Rosales; Rosaceae; Maloideae; Maleae; Malus	ADH1_SOLTU	402	E:2e-139	RecName: Full=Alcohol dehydrogenase 1 {ECO:0000303|PubMed:2102855};^Eukaryota; Viridiplantae; Streptophyta; Embryophyta; Tracheophyta; Spermatophyta; Magnoliophyta; eudicotyledons; Gunneridae; Pentapetalae; asterids; lamiids; Solanales; Solanaceae; Solanoideae; Solaneae; Solanum	PF00107.25	ADH_zinc_N	Zinc-binding dehydrogenase	COG1062	alcohol dehydrogenase	.	.	.	GO:0055114|oxidation-reduction process	GO:0004022|alcohol dehydrogenase (NAD) activity;GO:0008270|zinc ion binding	GO:0005737|cytoplasm
f2p60_1559_24796	0.505414	2.04936e-08	up	no	-0.293415	0.0032067	down	no	0.342218	0.000171927	up	no	-0.738512	0.0205782	down	no	-1.39249	3.39043e-17	down	yes	Gene.12473::PuPacbio_f2p60_1559_transcript24796_g3::g.12473::m.12473	187-1224[+]	gi|566179484|ref|XM_002309863.2|	2442	E:0	Populus trichocarpa alcohol-dehydrogenase family protein (POPTR_0007s03890g) mRNA, complete cds	gi|566179485|ref|XP_002309899.2|	656	E:0	alcohol-dehydrogenase family protein [Populus trichocarpa]	ADH_MALDO	588	E:0	RecName: Full=Alcohol dehydrogenase;^Eukaryota; Viridiplantae; Streptophyta; Embryophyta; Tracheophyta; Spermatophyta; Magnoliophyta; eudicotyledons; Gunneridae; Pentapetalae; rosids; fabids; Rosales; Rosaceae; Maloideae; Maleae; Malus	ADH1_PETHY	643	E:0	RecName: Full=Alcohol dehydrogenase 1 {ECO:0000303|PubMed:1678286};^Eukaryota; Viridiplantae; Streptophyta; Embryophyta; Tracheophyta; Spermatophyta; Magnoliophyta; eudicotyledons; Gunneridae; Pentapetalae; asterids; lamiids; Solanales; Solanaceae; Petunioideae; Petunia	PF08240.11	ADH_N	Alcohol dehydrogenase GroES-like domain	.	.	.	.	.	GO:0055114|oxidation-reduction process	GO:0004022|alcohol dehydrogenase (NAD) activity;GO:0008270|zinc ion binding	GO:0005737|cytoplasm
f7p60_1504_25170	2.16196	0	up	yes	2.07846	7.82853e-304	up	yes	0.709962	8.33772e-19	up	no	0.112035	0.34191	up	no	0.25611	0.0118235	up	no	Gene.12668::PuPacbio_f7p60_1504_transcript25170_g1::g.12668::m.12668	130-1269[+]	gi|743878348|ref|XM_011037321.1|	2412	E:0	PREDICTED: Populus euphratica alcohol dehydrogenase class-3 (LOC105133363), mRNA	gi|743878349|ref|XP_011035623.1|	746	E:0	PREDICTED: alcohol dehydrogenase class-3 [Populus euphratica]	ADHX_ARATH	681	E:0	RecName: Full=Alcohol dehydrogenase class-3;^Eukaryota; Viridiplantae; Streptophyta; Embryophyta; Tracheophyta; Spermatophyta; Magnoliophyta; eudicotyledons; Gunneridae; Pentapetalae; rosids; malvids; Brassicales; Brassicaceae; Camelineae; Arabidopsis	ADHX_ARATH	707	E:0	RecName: Full=Alcohol dehydrogenase class-3;^Eukaryota; Viridiplantae; Streptophyta; Embryophyta; Tracheophyta; Spermatophyta; Magnoliophyta; eudicotyledons; Gunneridae; Pentapetalae; rosids; malvids; Brassicales; Brassicaceae; Camelineae; Arabidopsis	PF08240.11	ADH_N	Alcohol dehydrogenase GroES-like domain	COG1062	alcohol dehydrogenase	.	.	.	GO:0006069|ethanol oxidationGO:0055114|oxidation-reduction process	GO:0004022|alcohol dehydrogenase (NAD) activity;GO:0051903|S-(hydroxymethyl)glutathione dehydrogenase activity;GO:0008270|zinc ion binding	GO:0005737|cytoplasm
f7p60_1439_25688	1.39472	5.91195e-203	up	yes	1.55048	1.38317e-291	up	yes	1.03626	3.18144e-62	up	yes	0.512785	2.44636e-19	up	no	0.341186	1.56553e-07	up	no	Gene.12911::PuPacbio_f7p60_1439_transcript25688_g1::g.12911::m.12911	129-1154[+]	gi|118482011|gb|EF144718.1|	2425	E:0	Populus trichocarpa clone WS01117_F18 unknown mRNA	gi|224100781|ref|XP_002312012.1|	707	E:0	putative adenosine kinase family protein [Populus trichocarpa]	ADK2_ARATH	622	E:0	RecName: Full=Adenosine kinase 2;^Eukaryota; Viridiplantae; Streptophyta; Embryophyta; Tracheophyta; Spermatophyta; Magnoliophyta; eudicotyledons; Gunneridae; Pentapetalae; rosids; malvids; Brassicales; Brassicaceae; Camelineae; Arabidopsis	ADK2_ARATH	622	E:0	RecName: Full=Adenosine kinase 2;^Eukaryota; Viridiplantae; Streptophyta; Embryophyta; Tracheophyta; Spermatophyta; Magnoliophyta; eudicotyledons; Gunneridae; Pentapetalae; rosids; malvids; Brassicales; Brassicaceae; Camelineae; Arabidopsis	PF00294.23	PfkB	pfkB family carbohydrate kinase	COG0524	pfkb domain protein	.	.	.	GO:0006169|adenosine salvage;GO:0044209|AMP salvage;GO:0016032|viral process	GO:0004001|adenosine kinase activity;GO:0005524|ATP binding;GO:0005507|copper ion binding	GO:0005829|cytosol;GO:0005634|nucleus;GO:0005886|plasma membrane
f3p60_1000_25185	0.969625	6.46276e-34	up	no	1.03007	1.10866e-41	up	yes	0.344512	8.37052e-05	up	no	0.0833551	0.411928	up	no	-0.0574234	0.532765	down	no	Gene.12676::PuPacbio_f3p60_1000_transcript25185_g4::g.12676::m.12676	2-1000[+]	gi|118484211|gb|EF145869.1|	1808	E:0	Populus trichocarpa clone WS0113_O09 unknown mRNA	gi|118484212|gb|ABK93986.1|	622	E:0	unknown [Populus trichocarpa]	ADK2_ARATH	547	E:0	RecName: Full=Adenosine kinase 2;^Eukaryota; Viridiplantae; Streptophyta; Embryophyta; Tracheophyta; Spermatophyta; Magnoliophyta; eudicotyledons; Gunneridae; Pentapetalae; rosids; malvids; Brassicales; Brassicaceae; Camelineae; Arabidopsis	ADK2_ARATH	548	E:0	RecName: Full=Adenosine kinase 2;^Eukaryota; Viridiplantae; Streptophyta; Embryophyta; Tracheophyta; Spermatophyta; Magnoliophyta; eudicotyledons; Gunneridae; Pentapetalae; rosids; malvids; Brassicales; Brassicaceae; Camelineae; Arabidopsis	PF00294.23	PfkB	pfkB family carbohydrate kinase	COG0524	pfkb domain protein	.	.	.	GO:0006169|adenosine salvage;GO:0044209|AMP salvage;GO:0016032|viral process	GO:0004001|adenosine kinase activity;GO:0005524|ATP binding;GO:0005507|copper ion binding	GO:0005829|cytosol;GO:0005634|nucleus;GO:0005886|plasma membrane
f2p42_1380_7962	1.04811	1.26561e-47	up	yes	0.890632	7.30584e-32	up	no	0.407456	8.74727e-06	up	no	0.0995094	0.365392	up	no	-0.00558047	0.941211	down	no	Gene.5002::PuPacbio_f2p42_1380_transcript7962_g1::g.5002::m.5002	948-1259[+]	gi|118484211|gb|EF145869.1|	2401	E:0	Populus trichocarpa clone WS0113_O09 unknown mRNA	gi|118484212|gb|ABK93986.1|	692	E:0	unknown [Populus trichocarpa]	ADK2_ARATH	617	E:0	RecName: Full=Adenosine kinase 2;^Eukaryota; Viridiplantae; Streptophyta; Embryophyta; Tracheophyta; Spermatophyta; Magnoliophyta; eudicotyledons; Gunneridae; Pentapetalae; rosids; malvids; Brassicales; Brassicaceae; Camelineae; Arabidopsis	.	.	.	.	.	.	.	.	.	.	.	.	.	.	.
f2p38_591_35271	1.06016	1.77668e-13	up	yes	0.644064	4.66931e-06	up	no	0.231547	0.117841	up	no	-0.0283322	0.854922	down	no	-0.359351	0.0385986	down	no	.	.	gi|566192305|ref|XM_002315274.2|	883	E:0	Populus trichocarpa putative adenosine kinase family protein (POPTR_0010s23120g) mRNA, complete cds	gi|118486395|gb|ABK95037.1|	164	E:2e-48	unknown [Populus trichocarpa]	ADK2_ARATH	150	E:4e-42	RecName: Full=Adenosine kinase 2;^Eukaryota; Viridiplantae; Streptophyta; Embryophyta; Tracheophyta; Spermatophyta; Magnoliophyta; eudicotyledons; Gunneridae; Pentapetalae; rosids; malvids; Brassicales; Brassicaceae; Camelineae; Arabidopsis	.	.	.	.	.	.	.	COG0524	pfkb domain protein	.	.	.	GO:0006169|adenosine salvage;GO:0044209|AMP salvage;GO:0016032|viral process	GO:0004001|adenosine kinase activity;GO:0005524|ATP binding;GO:0005507|copper ion binding	GO:0005829|cytosol;GO:0005634|nucleus;GO:0005886|plasma membrane
f2p60_572_35632	2.01611	6.84443e-90	up	yes	1.82427	7.8204e-96	up	yes	1.41963	8.55868e-40	up	yes	1.01275	5.04717e-09	up	yes	0.623478	1.67156e-09	up	no	Gene.16556::PuPacbio_f2p60_572_transcript35632_g9::g.16556::m.16556	2-409[+]	gi|157385057|gb|AC210509.1|	917	E:0	Populus trichocarpa clone POP050-I20, complete sequence	gi|224123792|ref|XP_002319165.1|	273	E:3e-89	short-chain dehydrogenase/reductase family protein [Populus trichocarpa]	ADRC3_ARATH	186	E:8e-57	RecName: Full=NADPH-dependent aldehyde reductase-like protein, chloroplastic {ECO:0000250|UniProtKB:Q9SQR2};^Eukaryota; Viridiplantae; Streptophyta; Embryophyta; Tracheophyta; Spermatophyta; Magnoliophyta; eudicotyledons; Gunneridae; Pentapetalae; rosids; malvids; Brassicales; Brassicaceae; Camelineae; Arabidopsis	ADRC3_ARATH	186	E:9e-58	RecName: Full=NADPH-dependent aldehyde reductase-like protein, chloroplastic {ECO:0000250|UniProtKB:Q9SQR2};^Eukaryota; Viridiplantae; Streptophyta; Embryophyta; Tracheophyta; Spermatophyta; Magnoliophyta; eudicotyledons; Gunneridae; Pentapetalae; rosids; malvids; Brassicales; Brassicaceae; Camelineae; Arabidopsis	PF13561.5	adh_short_C2	Enoyl-(Acyl carrier protein) reductase	COG1028	Dehydrogenase reductase	.	.	.	.	GO:0016491|oxidoreductase activity	GO:0009507|chloroplast
f3p60_1057_29440	-0.073633	0.601575	down	no	0.53111	8.82011e-06	up	no	0.947021	3.72205e-15	up	no	1.03428	8.7827e-20	up	yes	0.771404	1.80045e-07	up	no	Gene.14591::PuPacbio_f3p60_1057_transcript29440_g5::g.14591::m.14591	1-807[+]	gi|566231628|ref|XM_002325376.2|	1845	E:0	Populus trichocarpa hypothetical protein (POPTR_0019s04910g) mRNA, complete cds	gi|224144781|ref|XP_002325412.1|	511	E:2e-180	hypothetical protein POPTR_0019s04910g [Populus trichocarpa]	ADRC3_ARATH	322	E:2e-107	RecName: Full=NADPH-dependent aldehyde reductase-like protein, chloroplastic {ECO:0000250|UniProtKB:Q9SQR2};^Eukaryota; Viridiplantae; Streptophyta; Embryophyta; Tracheophyta; Spermatophyta; Magnoliophyta; eudicotyledons; Gunneridae; Pentapetalae; rosids; malvids; Brassicales; Brassicaceae; Camelineae; Arabidopsis	ADRC3_ARATH	348	E:6e-119	RecName: Full=NADPH-dependent aldehyde reductase-like protein, chloroplastic {ECO:0000250|UniProtKB:Q9SQR2};^Eukaryota; Viridiplantae; Streptophyta; Embryophyta; Tracheophyta; Spermatophyta; Magnoliophyta; eudicotyledons; Gunneridae; Pentapetalae; rosids; malvids; Brassicales; Brassicaceae; Camelineae; Arabidopsis	PF00106.24	adh_short	short chain dehydrogenase	COG1028	Dehydrogenase reductase	.	.	.	.	GO:0016491|oxidoreductase activity	GO:0009507|chloroplast
f2p60_925_11740	2.26725	2.35899e-215	up	yes	2.03103	2.18215e-198	up	yes	1.16796	5.00068e-24	up	yes	0.36798	0.116595	up	no	-0.497665	0.00176553	down	no	Gene.6530::PuPacbio_f2p60_925_transcript11740_g1::g.6530::m.6530	3-587[+]	gi|566211228|ref|XM_006372626.1|	1596	E:0	Populus trichocarpa hypothetical protein (POPTR_0017s03890g) mRNA, complete cds	gi|566211229|ref|XP_006372688.1|	390	E:5e-132	hypothetical protein POPTR_0017s03890g [Populus trichocarpa]	AER_ARATH	307	E:3e-101	RecName: Full=NADPH-dependent oxidoreductase 2-alkenal reductase {ECO:0000303|PubMed:16299173};^Eukaryota; Viridiplantae; Streptophyta; Embryophyta; Tracheophyta; Spermatophyta; Magnoliophyta; eudicotyledons; Gunneridae; Pentapetalae; rosids; malvids; Brassicales; Brassicaceae; Camelineae; Arabidopsis	AER_ARATH	307	E:5e-103	RecName: Full=NADPH-dependent oxidoreductase 2-alkenal reductase {ECO:0000303|PubMed:16299173};^Eukaryota; Viridiplantae; Streptophyta; Embryophyta; Tracheophyta; Spermatophyta; Magnoliophyta; eudicotyledons; Gunneridae; Pentapetalae; rosids; malvids; Brassicales; Brassicaceae; Camelineae; Arabidopsis	PF00107.25	ADH_zinc_N	Zinc-binding dehydrogenase	COG2130	alcohol dehydrogenase	.	.	.	GO:0046686|response to cadmium ion;GO:0006979|response to oxidative stressGO:0055114|oxidation-reduction process	GO:0032440|2-alkenal reductase [NAD(P)] activity	GO:0005829|cytosol;GO:0005654|nucleoplasm;GO:0005634|nucleus
f2p60_1858_22789	1.1606	3.35894e-28	up	yes	1.23663	1.07716e-37	up	yes	0.590223	1.91377e-07	up	no	0.622394	2.15169e-05	up	no	0.513033	2.69563e-06	up	no	Gene.11344::PuPacbio_f2p60_1858_transcript22789_g1::g.11344::m.11344	525-1625[+]	gi|566214038|ref|XM_002324353.2|	3258	E:0	Populus trichocarpa kelch repeat-containing F-box family protein (POPTR_0018s03590g) mRNA, complete cds	gi|566214039|ref|XP_002324389.2|	704	E:0	kelch repeat-containing F-box family protein [Populus trichocarpa]	AFR_ARATH	395	E:2e-130	RecName: Full=F-box protein AFR;^Eukaryota; Viridiplantae; Streptophyta; Embryophyta; Tracheophyta; Spermatophyta; Magnoliophyta; eudicotyledons; Gunneridae; Pentapetalae; rosids; malvids; Brassicales; Brassicaceae; Camelineae; Arabidopsis	AFR_ARATH	425	E:4e-146	RecName: Full=F-box protein AFR;^Eukaryota; Viridiplantae; Streptophyta; Embryophyta; Tracheophyta; Spermatophyta; Magnoliophyta; eudicotyledons; Gunneridae; Pentapetalae; rosids; malvids; Brassicales; Brassicaceae; Camelineae; Arabidopsis	PF00646.32	F-box	F-box domain	ENOG4110X8D	Kelch repeat-containing F-box family protein	.	.	.	GO:0016567|protein ubiquitination;GO:0010017|red or far-red light signaling pathway;GO:0009585|red, far-red light phototransduction	GO:0005515|protein binding	.
f6p60_3349_1258	-1.12125	8.67365e-62	down	yes	-0.938489	1.55949e-58	down	no	-0.331657	2.36237e-05	down	no	-0.185551	0.00803028	down	no	0.00448088	0.948887	up	no	Gene.1175::PuPacbio_f6p60_3349_transcript1258_g1::g.1175::m.1175	39-3221[+]	gi|743808932|ref|XM_011020089.1|	5829	E:0	PREDICTED: Populus euphratica neutral alpha-glucosidase C-like (LOC105121446), transcript variant X1, mRNA	gi|566146519|ref|XP_006368273.1|	1962	E:0	glycosyl hydrolase family 31 family protein [Populus trichocarpa]	AGL2_BACTQ	439	E:2e-136	RecName: Full=Alpha-glucosidase 2;^Bacteria; Firmicutes; Bacilli; Bacillales; Bacillaceae; Bacillus	AGL2_BACTQ	460	E:6e-145	RecName: Full=Alpha-glucosidase 2;^Bacteria; Firmicutes; Bacilli; Bacillales; Bacillaceae; Bacillus	PF13802.5	Gal_mutarotas_2	Galactose mutarotase-like	.	.	.	.	.	GO:0005975|carbohydrate metabolic process	GO:0004558|alpha-1,4-glucosidase activity;GO:0030246|carbohydrate binding;GO:0032450|maltose alpha-glucosidase activityGO:0004553|hydrolase activity, hydrolyzing O-glycosyl compounds	.
f2p60_625_34888	-1.01511	2.49948e-10	down	yes	-0.872797	4.90823e-09	down	no	-0.29603	0.0349418	down	no	-0.202114	0.210301	down	no	-0.125173	0.331595	down	no	.	.	gi|566148221|ref|XM_002297952.2|	928	E:0	Populus trichocarpa hypothetical protein (POPTR_0001s10310g) mRNA, complete cds	gi|224053805|ref|XP_002297988.1|	69.3	E:6e-13	hypothetical protein POPTR_0001s10310g [Populus trichocarpa]	AGP16_ARATH	57	E:8e-10	RecName: Full=Arabinogalactan peptide 16;^Eukaryota; Viridiplantae; Streptophyta; Embryophyta; Tracheophyta; Spermatophyta; Magnoliophyta; eudicotyledons; Gunneridae; Pentapetalae; rosids; malvids; Brassicales; Brassicaceae; Camelineae; Arabidopsis	.	.	.	.	.	.	.	ENOG410Z4BH	Arabinogalactan peptide	.	.	.	.	.	GO:0031225|anchored component of membrane;GO:0005886|plasma membrane
f2p60_539_36024	1.52894	2.94494e-19	up	yes	0.943786	1.78964e-08	up	no	0.54538	0.00475647	up	no	0.214273	0.337515	up	no	-0.330218	0.240155	down	no	.	.	gi|743900310|ref|XR_844885.1|	712	E:0	PREDICTED: Populus euphratica uncharacterized LOC105138914 (LOC105138914), ncRNA	gi|224143520|ref|XP_002324983.1|	128	E:1e-35	hypothetical protein POPTR_0018s05900g [Populus trichocarpa]	AGP22_ARATH	58.5	E:1e-10	RecName: Full=Arabinogalactan peptide 22;^Eukaryota; Viridiplantae; Streptophyta; Embryophyta; Tracheophyta; Spermatophyta; Magnoliophyta; eudicotyledons; Gunneridae; Pentapetalae; rosids; malvids; Brassicales; Brassicaceae; Camelineae; Arabidopsis	.	.	.	.	.	.	.	.	.	.	.	.	.	.	GO:0031225|anchored component of membrane;GO:0005886|plasma membrane
f2p31_1812_23028	1.03298	1.12037e-16	up	yes	0.484729	4.86774e-05	up	no	0.350318	0.0055692	up	no	0.201252	0.141183	up	no	0.195928	0.127647	up	no	Gene.11506::PuPacbio_f2p31_1812_transcript23028_g1::g.11506::m.11506	238-1371[+]	gi|566146820|ref|XM_006368353.1|	3053	E:0	Populus trichocarpa hypothetical protein (POPTR_0001s02600g) mRNA, complete cds	gi|566146821|ref|XP_006368415.1|	575	E:0	hypothetical protein POPTR_0001s02600g [Populus trichocarpa]	AHL13_ARATH	244	E:7e-72	RecName: Full=AT-hook motif nuclear-localized protein 13 {ECO:0000312|EMBL:FAA00284.1};^Eukaryota; Viridiplantae; Streptophyta; Embryophyta; Tracheophyta; Spermatophyta; Magnoliophyta; eudicotyledons; Gunneridae; Pentapetalae; rosids; malvids; Brassicales; Brassicaceae; Camelineae; Arabidopsis	AHL13_ARATH	263	E:7e-82	RecName: Full=AT-hook motif nuclear-localized protein 13 {ECO:0000312|EMBL:FAA00284.1};^Eukaryota; Viridiplantae; Streptophyta; Embryophyta; Tracheophyta; Spermatophyta; Magnoliophyta; eudicotyledons; Gunneridae; Pentapetalae; rosids; malvids; Brassicales; Brassicaceae; Camelineae; Arabidopsis	PF02178.18	AT_hook	AT hook motif	ENOG4111IXN	AT-hook protein	.	.	.	GO:0006355|regulation of transcription, DNA-templated;GO:0006351|transcription, DNA-templated	GO:0003677|DNA bindingGO:0003677|DNA binding	GO:0005829|cytosol;GO:0005634|nucleus
f2p60_940_30605	2.5052	1.73562e-168	up	yes	1.3979	4.13339e-44	up	yes	1.09286	7.52982e-21	up	yes	0.50071	0.0188362	up	no	-0.136622	0.465002	down	no	Gene.15059::PuPacbio_f2p60_940_transcript30605_g4::g.15059::m.15059	32-799[+]	gi|566159868|ref|XM_002301777.2|	1559	E:0	Populus trichocarpa hypothetical protein (POPTR_0002s25070g) mRNA, complete cds	gi|224065429|ref|XP_002301813.1|	370	E:1e-125	hypothetical protein POPTR_0002s25070g [Populus trichocarpa]	AIR12_ARATH	159	E:9e-45	RecName: Full=Auxin-induced in root cultures protein 12;^Eukaryota; Viridiplantae; Streptophyta; Embryophyta; Tracheophyta; Spermatophyta; Magnoliophyta; eudicotyledons; Gunneridae; Pentapetalae; rosids; malvids; Brassicales; Brassicaceae; Camelineae; Arabidopsis	AIR12_ARATH	184	E:3e-55	RecName: Full=Auxin-induced in root cultures protein 12;^Eukaryota; Viridiplantae; Streptophyta; Embryophyta; Tracheophyta; Spermatophyta; Magnoliophyta; eudicotyledons; Gunneridae; Pentapetalae; rosids; malvids; Brassicales; Brassicaceae; Camelineae; Arabidopsis	PF04526.12	DUF568	Protein of unknown function (DUF568)	ENOG410ZM7E	Protein of unknown function (DUF568)	.	ExpAA=40.38^PredHel=2^Topology=o4-26i237-254o	.	GO:0009734|auxin-activated signaling pathway;GO:0055114|oxidation-reduction process	GO:0046872|metal ion binding	GO:0031225|anchored component of membrane;GO:0005886|plasma membrane
f2p60_2319_3196	1.86642	7.30962e-102	up	yes	1.06531	2.21646e-30	up	yes	0.348009	0.00121926	up	no	0.0591962	0.598838	up	no	-0.189603	0.134785	down	no	Gene.2522::PuPacbio_f2p60_2319_transcript3196_g1::g.2522::m.2522	330-1997[+]	gi|566159651|ref|XM_002301720.2|	3927	E:0	Populus trichocarpa hypothetical protein (POPTR_0002s23800g) mRNA, complete cds	gi|566159652|ref|XP_002301756.2|	1128	E:0	hypothetical protein POPTR_0002s23800g [Populus trichocarpa]	AK3_ARATH	853	E:0	RecName: Full=Aspartokinase 3, chloroplastic;^Eukaryota; Viridiplantae; Streptophyta; Embryophyta; Tracheophyta; Spermatophyta; Magnoliophyta; eudicotyledons; Gunneridae; Pentapetalae; rosids; malvids; Brassicales; Brassicaceae; Camelineae; Arabidopsis	AK3_ARATH	853	E:0	RecName: Full=Aspartokinase 3, chloroplastic;^Eukaryota; Viridiplantae; Streptophyta; Embryophyta; Tracheophyta; Spermatophyta; Magnoliophyta; eudicotyledons; Gunneridae; Pentapetalae; rosids; malvids; Brassicales; Brassicaceae; Camelineae; Arabidopsis	PF00696.27	AA_kinase	Amino acid kinase family	COG0527	Aspartokinase	.	.	.	GO:0009089|lysine biosynthetic process via diaminopimelate;GO:0009088|threonine biosynthetic process	GO:0004072|aspartate kinase activity;GO:0005524|ATP binding	GO:0009570|chloroplast stroma
f5p60_1220_27701	2.11136	3.5865e-307	up	yes	1.51614	1.14733e-173	up	yes	1.12546	1.19986e-54	up	yes	0.432663	8.56701e-06	up	no	0.321087	0.0516846	up	no	Gene.13852::PuPacbio_f5p60_1220_transcript27701_g3::g.13852::m.13852	2-979[+]	gi|566209594|ref|XM_002323487.2|	1964	E:0	Populus trichocarpa hypothetical protein (POPTR_0016s10400g) mRNA, complete cds	gi|224140305|ref|XP_002323523.1|	567	E:0	hypothetical protein POPTR_0016s10400g [Populus trichocarpa]	AKRC9_ARATH	437	E:5e-151	RecName: Full=NADPH-dependent aldo-keto reductase, chloroplastic {ECO:0000303|PubMed:21169366};^Eukaryota; Viridiplantae; Streptophyta; Embryophyta; Tracheophyta; Spermatophyta; Magnoliophyta; eudicotyledons; Gunneridae; Pentapetalae; rosids; malvids; Brassicales; Brassicaceae; Camelineae; Arabidopsis	AKRC9_ARATH	493	E:3e-174	RecName: Full=NADPH-dependent aldo-keto reductase, chloroplastic {ECO:0000303|PubMed:21169366};^Eukaryota; Viridiplantae; Streptophyta; Embryophyta; Tracheophyta; Spermatophyta; Magnoliophyta; eudicotyledons; Gunneridae; Pentapetalae; rosids; malvids; Brassicales; Brassicaceae; Camelineae; Arabidopsis	PF00248.20	Aldo_ket_red	Aldo/keto reductase family	COG0656	reductase	.	.	.	GO:0055114|oxidation-reduction process;GO:0009409|response to cold;GO:0009651|response to salt stress;GO:0009636|response to toxic substance;GO:0009414|response to water deprivation	GO:0008106|alcohol dehydrogenase (NADP+) activity;GO:0004033|aldo-keto reductase (NADP) activity;GO:0070401|NADP+ binding;GO:0016229|steroid dehydrogenase activity	GO:0009507|chloroplast
f2p14_1902_4696	-1.04158	2.06294e-48	down	yes	-0.245834	0.000803643	down	no	-0.187841	0.0194963	down	no	0.076853	0.402476	up	no	0.341416	0.000117816	up	no	Gene.3414::PuPacbio_f2p14_1902_transcript4696_g1::g.3414::m.3414	3-1568[+]	gi|566214446|ref|XM_002324941.2|	3179	E:0	Populus trichocarpa aldehyde dehydrogenase family protein (POPTR_0018s06060g) mRNA, complete cds	gi|743900299|ref|XP_011043446.1|	987	E:0	PREDICTED: aldehyde dehydrogenase family 2 member C4 [Populus euphratica]	AL2C4_ARATH	749	E:0	RecName: Full=Aldehyde dehydrogenase family 2 member C4;^Eukaryota; Viridiplantae; Streptophyta; Embryophyta; Tracheophyta; Spermatophyta; Magnoliophyta; eudicotyledons; Gunneridae; Pentapetalae; rosids; malvids; Brassicales; Brassicaceae; Camelineae; Arabidopsis	AL2C4_ARATH	778	E:0	RecName: Full=Aldehyde dehydrogenase family 2 member C4;^Eukaryota; Viridiplantae; Streptophyta; Embryophyta; Tracheophyta; Spermatophyta; Magnoliophyta; eudicotyledons; Gunneridae; Pentapetalae; rosids; malvids; Brassicales; Brassicaceae; Camelineae; Arabidopsis	PF00171.21	Aldedh	Aldehyde dehydrogenase family	COG1012	Dehydrogenase	.	.	.	GO:0009699|phenylpropanoid biosynthetic processGO:0008152|metabolic process;GO:0055114|oxidation-reduction process	GO:0004029|aldehyde dehydrogenase (NAD) activity;GO:0050269|coniferyl-aldehyde dehydrogenase activityGO:0016491|oxidoreductase activity	GO:0005829|cytosol
f2p20_4419_292	-1.10574	8.45487e-54	down	yes	-0.872735	6.75882e-42	down	no	-0.910067	3.88534e-19	down	no	-0.51433	1.05265e-09	down	no	-0.375307	0.000189771	down	no	Gene.344::PuPacbio_f2p20_4419_transcript292_g1::g.344::m.344	3358-4209[+]	gi|743792255|ref|XM_011045718.1|	7232	E:0	PREDICTED: Populus euphratica indole-3-acetaldehyde oxidase-like (LOC105139320), mRNA	gi|743792256|ref|XP_011044020.1|	2127	E:0	PREDICTED: LOW QUALITY PROTEIN: indole-3-acetaldehyde oxidase-like [Populus euphratica]	ALDO2_ARATH	1348	E:0	RecName: Full=Indole-3-acetaldehyde oxidase;^Eukaryota; Viridiplantae; Streptophyta; Embryophyta; Tracheophyta; Spermatophyta; Magnoliophyta; eudicotyledons; Gunneridae; Pentapetalae; rosids; malvids; Brassicales; Brassicaceae; Camelineae; Arabidopsis	ALDO3_ARATH	398	E:4e-127	RecName: Full=Abscisic-aldehyde oxidase;^Eukaryota; Viridiplantae; Streptophyta; Embryophyta; Tracheophyta; Spermatophyta; Magnoliophyta; eudicotyledons; Gunneridae; Pentapetalae; rosids; malvids; Brassicales; Brassicaceae; Camelineae; Arabidopsis	PF02738.17	Ald_Xan_dh_C2	Molybdopterin-binding domain of aldehyde dehydrogenase	COG4630	xanthine dehydrogenase	.	.	.	GO:0009688|abscisic acid biosynthetic process;GO:0009851|auxin biosynthetic processGO:0055114|oxidation-reduction process	GO:0051537|2 iron, 2 sulfur cluster binding;GO:0010293|abscisic aldehyde oxidase activity;GO:0004031|aldehyde oxidase activity;GO:0009055|electron carrier activity;GO:0050660|flavin adenine dinucleotide binding;GO:0050302|indole-3-acetaldehyde oxidase activity;GO:0005506|iron ion binding;GO:0016614|oxidoreductase activity, acting on CH-OH group of donors;GO:0031625|ubiquitin protein ligase bindin…	GO:0005829|cytosol
f4p60_1282_8662	-0.475567	0.000132675	down	no	1.51777	3.01519e-67	up	yes	0.950802	4.34001e-20	up	no	2.01159	NA	up	no	1.73699	NA	up	no	Gene.5319::PuPacbio_f4p60_1282_transcript8662_g1::g.5319::m.5319	3-1139[+]	gi|118485791|gb|EF146691.1|	2250	E:0	Populus trichocarpa clone WS01212_C04 unknown mRNA	gi|224056853|ref|XP_002299056.1|	687	E:0	fructose-1 family protein [Populus trichocarpa]	ALF1_PEA	627	E:0	RecName: Full=Fructose-bisphosphate aldolase, cytoplasmic isozyme 1;^Eukaryota; Viridiplantae; Streptophyta; Embryophyta; Tracheophyta; Spermatophyta; Magnoliophyta; eudicotyledons; Gunneridae; Pentapetalae; rosids; fabids; Fabales; Fabaceae; Papilionoideae; Fabeae; Pisum	ALFC5_ARATH	649	E:0	RecName: Full=Fructose-bisphosphate aldolase 5, cytosolic {ECO:0000305};^Eukaryota; Viridiplantae; Streptophyta; Embryophyta; Tracheophyta; Spermatophyta; Magnoliophyta; eudicotyledons; Gunneridae; Pentapetalae; rosids; malvids; Brassicales; Brassicaceae; Camelineae; Arabidopsis	PF00274.18	Glycolytic	Fructose-bisphosphate aldolase class-I	COG3588	fructose-bisphosphate aldolase	.	.	.	GO:0006094|gluconeogenesis;GO:0006096|glycolytic processGO:0006096|glycolytic process	GO:0004332|fructose-bisphosphate aldolase activityGO:0004332|fructose-bisphosphate aldolase activity	GO:0009507|chloroplast;GO:0005829|cytosol
f4p60_1583_24681	-1.24847	4.75204e-91	down	yes	-1.67008	1.06204e-189	down	yes	-0.238985	0.000107825	down	no	1.03129	1.94149e-36	up	yes	1.44077	NA	up	no	Gene.12410::PuPacbio_f4p60_1583_transcript24681_g3::g.12410::m.12410	103-1293[+]	gi|566166944|ref|XM_002305426.2|	2700	E:0	Populus trichocarpa latex plastidic aldolase-like family protein (POPTR_0004s16920g) mRNA, complete cds	gi|224077927|ref|XP_002305462.1|	814	E:0	latex plastidic aldolase-like family protein [Populus trichocarpa]	ALFP2_ARATH	704	E:0	RecName: Full=Fructose-bisphosphate aldolase 2, chloroplastic {ECO:0000305};^Eukaryota; Viridiplantae; Streptophyta; Embryophyta; Tracheophyta; Spermatophyta; Magnoliophyta; eudicotyledons; Gunneridae; Pentapetalae; rosids; malvids; Brassicales; Brassicaceae; Camelineae; Arabidopsis	ALFP2_ARATH	704	E:0	RecName: Full=Fructose-bisphosphate aldolase 2, chloroplastic {ECO:0000305};^Eukaryota; Viridiplantae; Streptophyta; Embryophyta; Tracheophyta; Spermatophyta; Magnoliophyta; eudicotyledons; Gunneridae; Pentapetalae; rosids; malvids; Brassicales; Brassicaceae; Camelineae; Arabidopsis	PF00274.18	Glycolytic	Fructose-bisphosphate aldolase class-I	COG3588	fructose-bisphosphate aldolase	.	.	.	GO:0006094|gluconeogenesis;GO:0006096|glycolytic process;GO:0009737|response to abscisic acid;GO:0046686|response to cadmium ionGO:0006096|glycolytic process	GO:0004332|fructose-bisphosphate aldolase activityGO:0004332|fructose-bisphosphate aldolase activity	GO:0048046|apoplast;GO:0009507|chloroplast;GO:0009941|chloroplast envelope;GO:0009570|chloroplast stroma;GO:0016020|membrane;GO:0010287|plastoglobule;GO:0009579|thylakoid
f5p60_1679_6100	-1.46596	2.40505e-207	down	yes	-0.521805	2.91986e-36	down	no	0.0315817	0.528584	up	no	0.747686	1.67765e-62	up	no	1.02346	NA	up	no	Gene.4109::PuPacbio_f5p60_1679_transcript6100_g1::g.4109::m.4109	112-1302[+]	gi|566187687|ref|XM_002313724.2|	2765	E:0	Populus trichocarpa latex plastidic aldolase-like family protein (POPTR_0009s12710g) mRNA, complete cds	gi|224105301|ref|XP_002313760.1|	813	E:0	latex plastidic aldolase-like family protein [Populus trichocarpa]	ALFP2_ARATH	704	E:0	RecName: Full=Fructose-bisphosphate aldolase 2, chloroplastic {ECO:0000305};^Eukaryota; Viridiplantae; Streptophyta; Embryophyta; Tracheophyta; Spermatophyta; Magnoliophyta; eudicotyledons; Gunneridae; Pentapetalae; rosids; malvids; Brassicales; Brassicaceae; Camelineae; Arabidopsis	ALFP2_ARATH	704	E:0	RecName: Full=Fructose-bisphosphate aldolase 2, chloroplastic {ECO:0000305};^Eukaryota; Viridiplantae; Streptophyta; Embryophyta; Tracheophyta; Spermatophyta; Magnoliophyta; eudicotyledons; Gunneridae; Pentapetalae; rosids; malvids; Brassicales; Brassicaceae; Camelineae; Arabidopsis	PF00274.18	Glycolytic	Fructose-bisphosphate aldolase class-I	COG3588	fructose-bisphosphate aldolase	.	.	.	GO:0006094|gluconeogenesis;GO:0006096|glycolytic process;GO:0009737|response to abscisic acid;GO:0046686|response to cadmium ionGO:0006096|glycolytic process	GO:0004332|fructose-bisphosphate aldolase activityGO:0004332|fructose-bisphosphate aldolase activity	GO:0048046|apoplast;GO:0009507|chloroplast;GO:0009941|chloroplast envelope;GO:0009570|chloroplast stroma;GO:0016020|membrane;GO:0010287|plastoglobule;GO:0009579|thylakoid
f2p60_1460_7305	-1.53474	0.000460551	down	yes	-1.27984	0.00130262	down	yes	-0.877923	0.0092214	down	no	-0.0841123	0.775432	down	no	0.167927	0.601086	up	no	Gene.4712::PuPacbio_f2p60_1460_transcript7305_g1::g.4712::m.4712	622-1263[+]	gi|566181198|ref|XM_002310255.2|	2586	E:0	Populus trichocarpa plastidic aldolase family protein (POPTR_0007s13800g) mRNA, complete cds	gi|224094919|ref|XP_002310291.1|	416	E:0	plastidic aldolase family protein [Populus trichocarpa]	ALFP2_ARATH	362	E:0	RecName: Full=Fructose-bisphosphate aldolase 2, chloroplastic {ECO:0000305};^Eukaryota; Viridiplantae; Streptophyta; Embryophyta; Tracheophyta; Spermatophyta; Magnoliophyta; eudicotyledons; Gunneridae; Pentapetalae; rosids; malvids; Brassicales; Brassicaceae; Camelineae; Arabidopsis	ALFP_ORYSJ	369	E:2e-126	RecName: Full=Fructose-bisphosphate aldolase, chloroplastic {ECO:0000305};^Eukaryota; Viridiplantae; Streptophyta; Embryophyta; Tracheophyta; Spermatophyta; Magnoliophyta; Liliopsida; Poales; Poaceae; BOP clade; Oryzoideae; Oryzeae; Oryzinae; Oryza	PF00274.18	Glycolytic	Fructose-bisphosphate aldolase class-I	COG3588	fructose-bisphosphate aldolase	.	.	.	GO:0006094|gluconeogenesis;GO:0006096|glycolytic processGO:0006096|glycolytic process	GO:0004332|fructose-bisphosphate aldolase activityGO:0004332|fructose-bisphosphate aldolase activity	GO:0005737|cytoplasm;GO:0010287|plastoglobule
f2p60_443_37121	1.1254	1.86626e-05	up	yes	0.263802	0.367455	up	no	-0.152629	0.606236	down	no	-0.210607	0.438196	down	no	0.158588	0.541054	up	no	.	.	gi|566204281|ref|XM_002321061.2|	721	E:0	Populus trichocarpa aldo/keto reductase family protein (POPTR_0014s14490g) mRNA, complete cds	gi|566204282|ref|XP_002321097.2|	64.7	E:3e-10	aldo/keto reductase family protein [Populus trichocarpa]	ALKR6_ARATH	48.5	E:4e-06	RecName: Full=Probable aldo-keto reductase 6;^Eukaryota; Viridiplantae; Streptophyta; Embryophyta; Tracheophyta; Spermatophyta; Magnoliophyta; eudicotyledons; Gunneridae; Pentapetalae; rosids; malvids; Brassicales; Brassicaceae; Camelineae; Arabidopsis	.	.	.	.	.	.	.	COG0667	Aldo keto reductase	.	.	.	.	GO:0016491|oxidoreductase activity	.
f2p60_1283_8588	3.01788	3.43471e-251	up	yes	2.68541	4.45674e-198	up	yes	2.06364	1.47468e-91	up	yes	0.322675	0.0124824	up	no	0.0640885	0.650558	up	no	Gene.5275::PuPacbio_f2p60_1283_transcript8588_g1::g.5275::m.5275	58-984[+]	gi|743793830|ref|XR_845545.1|	2074	E:0	PREDICTED: Populus euphratica isoflavone reductase homolog (LOC105142335), transcript variant X2, misc_RNA	gi|743793828|ref|XP_011048219.1|	619	E:0	PREDICTED: isoflavone reductase-like protein isoform X1 [Populus euphratica]	ALL12_OLEEU	471	E:3e-164	RecName: Full=Isoflavone reductase-like protein;^Eukaryota; Viridiplantae; Streptophyta; Embryophyta; Tracheophyta; Spermatophyta; Magnoliophyta; eudicotyledons; Gunneridae; Pentapetalae; asterids; lamiids; Lamiales; Oleaceae; Oleeae; Olea	ALL12_OLEEU	471	E:3e-166	RecName: Full=Isoflavone reductase-like protein;^Eukaryota; Viridiplantae; Streptophyta; Embryophyta; Tracheophyta; Spermatophyta; Magnoliophyta; eudicotyledons; Gunneridae; Pentapetalae; asterids; lamiids; Lamiales; Oleaceae; Oleeae; Olea	PF05368.12	NmrA	NmrA-like family	.	.	.	.	.	GO:0006694|steroid biosynthetic process;GO:0055114|oxidation-reduction process	GO:0016491|oxidoreductase activityGO:0003824|catalytic activity;GO:0050662|coenzyme binding;GO:0003854|3-beta-hydroxy-delta5-steroid dehydrogenase activity;GO:0016616|oxidoreductase activity, acting on the CH-OH group of donors, NAD or NADP as acceptor	GO:0005737|cytoplasm
f2p60_1867_22642	-1.28904	1.12487e-18	down	yes	-0.32334	0.00862615	down	no	-0.248083	0.0543542	down	no	0.0421981	0.80102	up	no	0.133752	0.272078	up	no	Gene.11281::PuPacbio_f2p60_1867_transcript22642_g4::g.11281::m.11281	3-1538[+]	gi|743846916|ref|XM_011029552.1|	2983	E:0	PREDICTED: Populus euphratica allantoinase (LOC105128047), transcript variant X3, mRNA	gi|566164850|ref|XP_002305806.2|	877	E:0	hypothetical protein POPTR_0004s04190g [Populus trichocarpa]	ALN_ARATH	666	E:0	RecName: Full=Allantoinase;^Eukaryota; Viridiplantae; Streptophyta; Embryophyta; Tracheophyta; Spermatophyta; Magnoliophyta; eudicotyledons; Gunneridae; Pentapetalae; rosids; malvids; Brassicales; Brassicaceae; Camelineae; Arabidopsis	ALN_ARATH	737	E:0	RecName: Full=Allantoinase;^Eukaryota; Viridiplantae; Streptophyta; Embryophyta; Tracheophyta; Spermatophyta; Magnoliophyta; eudicotyledons; Gunneridae; Pentapetalae; rosids; malvids; Brassicales; Brassicaceae; Camelineae; Arabidopsis	PF01979.19	Amidohydro_1	Amidohydrolase family	COG0044	Dihydroorotase	.	ExpAA=19.13^PredHel=1^Topology=i13-31o	.	GO:0000256|allantoin catabolic process;GO:0006995|cellular response to nitrogen starvation;GO:0006145|purine nucleobase catabolic process;GO:0010136|ureide catabolic process	GO:0004038|allantoinase activity;GO:0050897|cobalt ion binding;GO:0008270|zinc ion bindingGO:0016787|hydrolase activity	GO:0005783|endoplasmic reticulum
f2p44_1781_23308	-1.04759	1.61563e-12	down	yes	-0.498289	0.000107932	down	no	-0.319016	0.00718422	down	no	-0.0593972	0.671813	down	no	0.28863	0.00575478	up	no	Gene.11667::PuPacbio_f2p44_1781_transcript23308_g1::g.11667::m.11667	3-1538[+]	gi|743846912|ref|XM_011029551.1|	2915	E:0	PREDICTED: Populus euphratica allantoinase (LOC105128047), transcript variant X2, mRNA	gi|566164850|ref|XP_002305806.2|	880	E:0	hypothetical protein POPTR_0004s04190g [Populus trichocarpa]	ALN_ARATH	670	E:0	RecName: Full=Allantoinase;^Eukaryota; Viridiplantae; Streptophyta; Embryophyta; Tracheophyta; Spermatophyta; Magnoliophyta; eudicotyledons; Gunneridae; Pentapetalae; rosids; malvids; Brassicales; Brassicaceae; Camelineae; Arabidopsis	ALN_ARATH	741	E:0	RecName: Full=Allantoinase;^Eukaryota; Viridiplantae; Streptophyta; Embryophyta; Tracheophyta; Spermatophyta; Magnoliophyta; eudicotyledons; Gunneridae; Pentapetalae; rosids; malvids; Brassicales; Brassicaceae; Camelineae; Arabidopsis	PF01979.19	Amidohydro_1	Amidohydrolase family	COG0044	Dihydroorotase	.	ExpAA=19.13^PredHel=1^Topology=i13-31o	.	GO:0000256|allantoin catabolic process;GO:0006995|cellular response to nitrogen starvation;GO:0006145|purine nucleobase catabolic process;GO:0010136|ureide catabolic process	GO:0004038|allantoinase activity;GO:0050897|cobalt ion binding;GO:0008270|zinc ion bindingGO:0016787|hydrolase activity	GO:0005783|endoplasmic reticulum
f4p60_1850_22926	0.48087	0.163297	up	no	0.462013	0.1594	up	no	1.37492	3.44886e-07	up	yes	0.750449	0.021229	up	no	0.190379	0.566899	up	no	Gene.11432::PuPacbio_f4p60_1850_transcript22926_g1::g.11432::m.11432	230-1243[+]	gi|566173347|ref|XM_002307703.2|	3055	E:0	Populus trichocarpa hypothetical protein (POPTR_0005s26390g) mRNA, complete cds	gi|566173348|ref|XP_002307739.2|	641	E:0	hypothetical protein POPTR_0005s26390g [Populus trichocarpa]	ALPL_ARATH	97.8	E:3e-26	RecName: Full=Protein ALP1-like {ECO:0000305};^Eukaryota; Viridiplantae; Streptophyta; Embryophyta; Tracheophyta; Spermatophyta; Magnoliophyta; eudicotyledons; Gunneridae; Pentapetalae; rosids; malvids; Brassicales; Brassicaceae; Camelineae; Arabidopsis	ALP1_ARATH	99.4	E:4e-22	RecName: Full=Protein ANTAGONIST OF LIKE HETEROCHROMATIN PROTEIN 1 {ECO:0000303|PubMed:26642436};^Eukaryota; Viridiplantae; Streptophyta; Embryophyta; Tracheophyta; Spermatophyta; Magnoliophyta; eudicotyledons; Gunneridae; Pentapetalae; rosids; malvids; Brassicales; Brassicaceae; Camelineae; Arabidopsis	PF13359.5	DDE_Tnp_4	DDE superfamily endonuclease	ENOG411206Y	transposon protein	.	.	.	GO:0031936|negative regulation of chromatin silencing;GO:0006351|transcription, DNA-templated	GO:0003682|chromatin binding;GO:0046872|metal ion binding;GO:0004518|nuclease activity	GO:0035098|ESC/E(Z) complex;GO:0005634|nucleus;GO:0035102|PRC1 complex
f3p60_1976_22165	0.102535	0.660375	up	no	0.461897	0.0267847	up	no	1.46988	1.80934e-14	up	yes	0.84141	0.00334619	up	no	-0.115347	0.704674	down	no	Gene.10960::PuPacbio_f3p60_1976_transcript22165_g3::g.10960::m.10960	113-1684[+]	gi|566214787|ref|XM_006371966.1|	3345	E:0	Populus trichocarpa hypothetical protein (POPTR_0018s07790g) mRNA, complete cds	gi|566214788|ref|XP_006372028.1|	969	E:0	hypothetical protein POPTR_0018s07790g [Populus trichocarpa]	ALPL_ARATH	154	E:2e-39	RecName: Full=Protein ALP1-like {ECO:0000305};^Eukaryota; Viridiplantae; Streptophyta; Embryophyta; Tracheophyta; Spermatophyta; Magnoliophyta; eudicotyledons; Gunneridae; Pentapetalae; rosids; malvids; Brassicales; Brassicaceae; Camelineae; Arabidopsis	ALPL_ARATH	154	E:4e-40	RecName: Full=Protein ALP1-like {ECO:0000305};^Eukaryota; Viridiplantae; Streptophyta; Embryophyta; Tracheophyta; Spermatophyta; Magnoliophyta; eudicotyledons; Gunneridae; Pentapetalae; rosids; malvids; Brassicales; Brassicaceae; Camelineae; Arabidopsis	PF13359.5	DDE_Tnp_4	DDE superfamily endonuclease	ENOG411206Y	transposon protein	.	.	.	.	GO:0046872|metal ion binding;GO:0004518|nuclease activity	GO:0005634|nucleus
f5p60_1175_28163	-1.27917	8.99044e-20	down	yes	-1.35371	8.21252e-28	down	yes	-1.12381	1.28031e-18	down	yes	-0.736623	1.33634e-07	down	no	-0.765285	6.99151e-09	down	no	Gene.14056::PuPacbio_f5p60_1175_transcript28163_g2::g.14056::m.14056	139-978[+]	gi|743812423|ref|XM_011020975.1|	1857	E:0	PREDICTED: Populus euphratica protein ALUMINUM SENSITIVE 3 (LOC105122069), mRNA	gi|224092015|ref|XP_002309439.1|	523	E:0	hypothetical protein POPTR_0006s23220g [Populus trichocarpa]	ALS3_ARATH	417	E:4e-144	RecName: Full=Protein ALUMINUM SENSITIVE 3;^Eukaryota; Viridiplantae; Streptophyta; Embryophyta; Tracheophyta; Spermatophyta; Magnoliophyta; eudicotyledons; Gunneridae; Pentapetalae; rosids; malvids; Brassicales; Brassicaceae; Camelineae; Arabidopsis	ALS3_ARATH	438	E:4e-154	RecName: Full=Protein ALUMINUM SENSITIVE 3;^Eukaryota; Viridiplantae; Streptophyta; Embryophyta; Tracheophyta; Spermatophyta; Magnoliophyta; eudicotyledons; Gunneridae; Pentapetalae; rosids; malvids; Brassicales; Brassicaceae; Camelineae; Arabidopsis	PF03649.12	UPF0014	Uncharacterised protein family (UPF0014)	COG0390	(ABC) transporter	.	ExpAA=141.91^PredHel=7^Topology=o24-46i59-78o83-102i114-136o140-162i212-229o239-261i	.	GO:0010044|response to aluminum ion	GO:0015075|ion transmembrane transporter activity;GO:0005460|UDP-glucose transmembrane transporter activity	GO:0005887|integral component of plasma membrane;GO:0005886|plasma membrane;GO:0012506|vesicle membrane
f2p58_1148_28386	-0.630456	2.60019e-06	down	no	-1.04613	8.3973e-13	down	yes	-0.975938	1.10687e-11	down	no	-0.83181	2.1011e-09	down	no	-0.45469	0.00073947	down	no	Gene.14146::PuPacbio_f2p58_1148_transcript28386_g1::g.14146::m.14146	64-903[+]	gi|566177729|ref|XM_002309403.2|	1914	E:0	Populus trichocarpa hypothetical protein (POPTR_0006s23220g) mRNA, complete cds	gi|224092015|ref|XP_002309439.1|	523	E:0	hypothetical protein POPTR_0006s23220g [Populus trichocarpa]	ALS3_ARATH	417	E:3e-144	RecName: Full=Protein ALUMINUM SENSITIVE 3;^Eukaryota; Viridiplantae; Streptophyta; Embryophyta; Tracheophyta; Spermatophyta; Magnoliophyta; eudicotyledons; Gunneridae; Pentapetalae; rosids; malvids; Brassicales; Brassicaceae; Camelineae; Arabidopsis	ALS3_ARATH	438	E:4e-154	RecName: Full=Protein ALUMINUM SENSITIVE 3;^Eukaryota; Viridiplantae; Streptophyta; Embryophyta; Tracheophyta; Spermatophyta; Magnoliophyta; eudicotyledons; Gunneridae; Pentapetalae; rosids; malvids; Brassicales; Brassicaceae; Camelineae; Arabidopsis	PF03649.12	UPF0014	Uncharacterised protein family (UPF0014)	COG0390	(ABC) transporter	.	ExpAA=141.91^PredHel=7^Topology=o24-46i59-78o83-102i114-136o140-162i212-229o239-261i	.	GO:0010044|response to aluminum ion	GO:0015075|ion transmembrane transporter activity;GO:0005460|UDP-glucose transmembrane transporter activity	GO:0005887|integral component of plasma membrane;GO:0005886|plasma membrane;GO:0012506|vesicle membrane
f4p60_1522_25005	0.374861	0.0757556	up	no	1.18981	8.8167e-12	up	yes	1.54108	2.74368e-21	up	yes	0.826833	0.000608106	up	no	1.24231	1.0854e-07	up	yes	Gene.12578::PuPacbio_f4p60_1522_transcript25005_g2::g.12578::m.12578	2-1198[+]	gi|566199016|ref|XM_002319514.2|	2625	E:0	Populus trichocarpa hypothetical protein (POPTR_0013s02510g) mRNA, complete cds	gi|743829684|ref|XP_011023586.1|	699	E:0	PREDICTED: amidase 1-like isoform X1 [Populus euphratica]	AMI1_ARATH	438	E:4e-148	RecName: Full=Amidase 1;^Eukaryota; Viridiplantae; Streptophyta; Embryophyta; Tracheophyta; Spermatophyta; Magnoliophyta; eudicotyledons; Gunneridae; Pentapetalae; rosids; malvids; Brassicales; Brassicaceae; Camelineae; Arabidopsis	AMI1_ARATH	462	E:3e-159	RecName: Full=Amidase 1;^Eukaryota; Viridiplantae; Streptophyta; Embryophyta; Tracheophyta; Spermatophyta; Magnoliophyta; eudicotyledons; Gunneridae; Pentapetalae; rosids; malvids; Brassicales; Brassicaceae; Camelineae; Arabidopsis	PF01425.20	Amidase	Amidase	COG0154	Allows the formation of correctly charged Gln-tRNA(Gln) through the transamidation of misacylated Glu-tRNA(Gln) in organisms which lack glutaminyl-tRNA synthetase. The reaction takes place in the presence of glutamine and ATP through an activated gamma-phospho-Glu-tRNA(Gln) (By similarity)	.	.	.	GO:0009684|indoleacetic acid biosynthetic process	GO:0004040|amidase activity;GO:0016810|hydrolase activity, acting on carbon-nitrogen (but not peptide) bonds;GO:0043864|indoleacetamide hydrolase activity	GO:0005737|cytoplasm;GO:0005829|cytosol
f3p60_1524_7045	0.273341	0.07379	up	no	0.821142	9.53169e-10	up	no	1.2116	1.34133e-17	up	yes	0.700844	0.000143049	up	no	1.07767	1.52859e-07	up	yes	Gene.4595::PuPacbio_f3p60_1524_transcript7045_g1::g.4595::m.4595	524-1327[+]	gi|743829679|ref|XM_011025282.1|	2435	E:0	PREDICTED: Populus euphratica amidase 1-like (LOC105125015), mRNA	gi|743829680|ref|XP_011023584.1|	590	E:0	PREDICTED: LOW QUALITY PROTEIN: amidase 1-like [Populus euphratica]	AMI1_ARATH	395	E:1e-146	RecName: Full=Amidase 1;^Eukaryota; Viridiplantae; Streptophyta; Embryophyta; Tracheophyta; Spermatophyta; Magnoliophyta; eudicotyledons; Gunneridae; Pentapetalae; rosids; malvids; Brassicales; Brassicaceae; Camelineae; Arabidopsis	AMI1_ARATH	340	E:1e-113	RecName: Full=Amidase 1;^Eukaryota; Viridiplantae; Streptophyta; Embryophyta; Tracheophyta; Spermatophyta; Magnoliophyta; eudicotyledons; Gunneridae; Pentapetalae; rosids; malvids; Brassicales; Brassicaceae; Camelineae; Arabidopsis	PF01425.20	Amidase	Amidase	COG0154	Allows the formation of correctly charged Gln-tRNA(Gln) through the transamidation of misacylated Glu-tRNA(Gln) in organisms which lack glutaminyl-tRNA synthetase. The reaction takes place in the presence of glutamine and ATP through an activated gamma-phospho-Glu-tRNA(Gln) (By similarity)	.	.	.	GO:0009684|indoleacetic acid biosynthetic process	GO:0004040|amidase activity;GO:0016810|hydrolase activity, acting on carbon-nitrogen (but not peptide) bonds;GO:0043864|indoleacetamide hydrolase activity	GO:0005737|cytoplasm;GO:0005829|cytosol
f2p60_552_15439	-0.743219	3.23666e-11	down	no	-1.46988	2.11123e-28	down	yes	-1.67981	8.87581e-40	down	yes	-0.713624	2.00138e-11	down	no	-0.120315	0.355446	down	no	.	.	gi|743888905|ref|XM_011040285.1|	499	E:4e-138	PREDICTED: Populus euphratica uncharacterized LOC105135422 (LOC105135422), mRNA	gi|566199459|ref|XP_006375864.1|	156	E:5e-43	hypothetical protein POPTR_0013s04710g [Populus trichocarpa]	AMT12_ARATH	99.4	E:5e-23	RecName: Full=Ammonium transporter 1 member 2;^Eukaryota; Viridiplantae; Streptophyta; Embryophyta; Tracheophyta; Spermatophyta; Magnoliophyta; eudicotyledons; Gunneridae; Pentapetalae; rosids; malvids; Brassicales; Brassicaceae; Camelineae; Arabidopsis	.	.	.	.	.	.	.	COG0004	ammonium Transporter	.	.	.	GO:0072488|ammonium transmembrane transport;GO:0015696|ammonium transport;GO:0015843|methylammonium transport;GO:0009624|response to nematode	GO:0008519|ammonium transmembrane transporter activity	GO:0005887|integral component of plasma membrane;GO:0005886|plasma membrane
f3p60_245_39366	-1.95687	0.000286424	down	yes	-1.75997	0.000562678	down	yes	-0.633487	0.103184	down	no	-0.281234	0.402785	down	no	0.0481396	0.884651	up	no	.	.	gi|566229232|ref|XM_002325754.2|	357	E:1e-95	Populus trichocarpa ammonium transporter 2 family protein (POPTR_0019s04030g) mRNA, complete cds	gi|459464833|gb|AGG68787.1|	92.8	E:8e-22	putative high affinity ammonium transporter, partial [Populus simonii x (Populus nigra x Salix matsudana)]	AMT12_SOLLC	52	E:1e-07	RecName: Full=Ammonium transporter 1 member 2;^Eukaryota; Viridiplantae; Streptophyta; Embryophyta; Tracheophyta; Spermatophyta; Magnoliophyta; eudicotyledons; Gunneridae; Pentapetalae; asterids; lamiids; Solanales; Solanaceae; Solanoideae; Solaneae; Solanum; Lycopersicon	.	.	.	.	.	.	.	COG0004	ammonium Transporter	.	.	.	GO:0072488|ammonium transmembrane transport;GO:0015696|ammonium transport;GO:0015695|organic cation transport	GO:0008519|ammonium transmembrane transporter activity	GO:0005887|integral component of plasma membrane
f2p31_1645_6180	-2.00549	6.14434e-217	down	yes	-1.554	2.00736e-132	down	yes	-1.57438	8.32101e-96	down	yes	-0.190586	0.472197	down	no	0.115114	0.219356	up	no	Gene.4141::PuPacbio_f2p31_1645_transcript6180_g1::g.4141::m.4141	1-897[+]	gi|566229232|ref|XM_002325754.2|	2839	E:0	Populus trichocarpa ammonium transporter 2 family protein (POPTR_0019s04030g) mRNA, complete cds	gi|566229233|ref|XP_002325790.2|	923	E:0	ammonium transporter 2 family protein [Populus trichocarpa]	AMT12_SOLLC	739	E:0	RecName: Full=Ammonium transporter 1 member 2;^Eukaryota; Viridiplantae; Streptophyta; Embryophyta; Tracheophyta; Spermatophyta; Magnoliophyta; eudicotyledons; Gunneridae; Pentapetalae; asterids; lamiids; Solanales; Solanaceae; Solanoideae; Solaneae; Solanum; Lycopersicon	AMT12_SOLLC	451	E:3e-155	RecName: Full=Ammonium transporter 1 member 2;^Eukaryota; Viridiplantae; Streptophyta; Embryophyta; Tracheophyta; Spermatophyta; Magnoliophyta; eudicotyledons; Gunneridae; Pentapetalae; asterids; lamiids; Solanales; Solanaceae; Solanoideae; Solaneae; Solanum; Lycopersicon	PF00909.20	Ammonium_transp	Ammonium Transporter Family	COG0004	ammonium Transporter	.	ExpAA=138.55^PredHel=6^Topology=o64-86i98-120o147-166i173-195o215-237i258-277o	.	GO:0072488|ammonium transmembrane transport;GO:0015696|ammonium transport;GO:0015695|organic cation transportGO:0015696|ammonium transport	GO:0008519|ammonium transmembrane transporter activityGO:0008519|ammonium transmembrane transporter activity	GO:0005887|integral component of plasma membraneGO:0016020|membrane
f6p60_1644_24184	-0.873046	1.25915e-58	down	no	-1.59161	3.30327e-198	down	yes	-1.78769	2.74923e-155	down	yes	-0.780989	3.24174e-27	down	no	-0.0630678	0.584503	down	no	Gene.12136::PuPacbio_f6p60_1644_transcript24184_g1::g.12136::m.12136	3-1577[+]	gi|743888905|ref|XM_011040285.1|	2499	E:0	PREDICTED: Populus euphratica uncharacterized LOC105135422 (LOC105135422), mRNA	gi|743888906|ref|XP_011038587.1|	912	E:0	PREDICTED: uncharacterized protein LOC105135422 [Populus euphratica]	AMT12_SOLLC	730	E:0	RecName: Full=Ammonium transporter 1 member 2;^Eukaryota; Viridiplantae; Streptophyta; Embryophyta; Tracheophyta; Spermatophyta; Magnoliophyta; eudicotyledons; Gunneridae; Pentapetalae; asterids; lamiids; Solanales; Solanaceae; Solanoideae; Solaneae; Solanum; Lycopersicon	AMT12_SOLLC	827	E:0	RecName: Full=Ammonium transporter 1 member 2;^Eukaryota; Viridiplantae; Streptophyta; Embryophyta; Tracheophyta; Spermatophyta; Magnoliophyta; eudicotyledons; Gunneridae; Pentapetalae; asterids; lamiids; Solanales; Solanaceae; Solanoideae; Solaneae; Solanum; Lycopersicon	PF00909.20	Ammonium_transp	Ammonium Transporter Family	COG0004	ammonium Transporter	.	ExpAA=225.81^PredHel=11^Topology=o63-85i97-119o147-166i173-195o215-237i258-280o300-322i327-349o353-372i385-407o438-460i	.	GO:0072488|ammonium transmembrane transport;GO:0015696|ammonium transport;GO:0015695|organic cation transportGO:0015696|ammonium transport	GO:0008519|ammonium transmembrane transporter activityGO:0008519|ammonium transmembrane transporter activity	GO:0005887|integral component of plasma membraneGO:0016020|membrane
f2p60_1664_6176	0.390505	9.09863e-06	up	no	1.35485	5.84192e-80	up	yes	1.48224	1.5771e-79	up	yes	1.14968	1.63715e-24	up	yes	1.23142	1.3078e-25	up	yes	Gene.4138::PuPacbio_f2p60_1664_transcript6176_g1::g.4138::m.4138	68-448[+]	gi|158749683|gb|AC213413.1|	2767	E:0	Populus trichocarpa clone POP014-E15, complete sequence	gi|566206039|ref|XP_006374283.1|	702	E:0	hypothetical protein POPTR_0015s05670g [Populus trichocarpa]	ANGLT_ROSHC	372	E:3e-121	RecName: Full=Anthocyanidin 5,3-O-glucosyltransferase;^Eukaryota; Viridiplantae; Streptophyta; Embryophyta; Tracheophyta; Spermatophyta; Magnoliophyta; eudicotyledons; Gunneridae; Pentapetalae; rosids; fabids; Rosales; Rosaceae; Rosoideae; Rosoideae unplaced; Rosa	I7GT1_SOYBN	90.1	E:2e-20	RecName: Full=Isoflavone 7-O-glucosyltransferase 1;^Eukaryota; Viridiplantae; Streptophyta; Embryophyta; Tracheophyta; Spermatophyta; Magnoliophyta; eudicotyledons; Gunneridae; Pentapetalae; rosids; fabids; Fabales; Fabaceae; Papilionoideae; Phaseoleae; Glycine; Soja	.	.	.	COG1819	Transferase	.	.	.	GO:0008152|metabolic process	GO:0050004|isoflavone 7-O-glucosyltransferase activity;GO:0080043|quercetin 3-O-glucosyltransferase activity;GO:0080044|quercetin 7-O-glucosyltransferase activity	GO:0043231|intracellular membrane-bounded organelle
f2p23_2302_3270	1.26525	1.35979e-33	up	yes	0.365519	0.00157276	up	no	0.11559	0.370735	up	no	-0.047879	0.706194	down	no	0.112076	0.345347	up	no	Gene.2572::PuPacbio_f2p23_2302_transcript3270_g1::g.2572::m.2572	120-620[+]	gi|743913409|ref|XM_011002311.1|	3563	E:0	PREDICTED: Populus euphratica probable protein arginine N-methyltransferase 3 (LOC105108124), mRNA	gi|566147616|ref|XP_002299193.2|	953	E:0	arginine N-methyltransferase family protein [Populus trichocarpa]	ANM3_ARATH	547	E:0	RecName: Full=Probable protein arginine N-methyltransferase 3;^Eukaryota; Viridiplantae; Streptophyta; Embryophyta; Tracheophyta; Spermatophyta; Magnoliophyta; eudicotyledons; Gunneridae; Pentapetalae; rosids; malvids; Brassicales; Brassicaceae; Camelineae; Arabidopsis	ANM3_ARATH	132	E:5e-35	RecName: Full=Probable protein arginine N-methyltransferase 3;^Eukaryota; Viridiplantae; Streptophyta; Embryophyta; Tracheophyta; Spermatophyta; Magnoliophyta; eudicotyledons; Gunneridae; Pentapetalae; rosids; malvids; Brassicales; Brassicaceae; Camelineae; Arabidopsis	PF12756.6	zf-C2H2_2	C2H2 type zinc-finger (2 copies)	ENOG410XQYH	Protein arginine n-methyltransferase	.	.	.	GO:0006355|regulation of transcription, DNA-templated	GO:0008469|histone-arginine N-methyltransferase activity;GO:0046872|metal ion binding;GO:0003676|nucleic acid binding;GO:0035242|protein-arginine omega-N asymmetric methyltransferase activity	GO:0005829|cytosol
f8p60_1364_26293	0.4265	0.15377	up	no	-0.0771554	0.803093	down	no	1.16441	1.31413e-06	up	yes	1.74302	NA	up	no	1.14863	3.9072e-07	up	yes	Gene.13191::PuPacbio_f8p60_1364_transcript26293_g2::g.13191::m.13191	38-976[+]	gi|566147481|ref|XM_002299179.2|	2364	E:0	Populus trichocarpa annexin 4 family protein (POPTR_0001s06220g) mRNA, complete cds	gi|224057357|ref|XP_002299215.1|	635	E:0	annexin 4 family protein [Populus trichocarpa]	ANXD4_ARATH	369	E:1e-123	RecName: Full=Annexin D4;^Eukaryota; Viridiplantae; Streptophyta; Embryophyta; Tracheophyta; Spermatophyta; Magnoliophyta; eudicotyledons; Gunneridae; Pentapetalae; rosids; malvids; Brassicales; Brassicaceae; Camelineae; Arabidopsis	ANXD4_ARATH	369	E:7e-126	RecName: Full=Annexin D4;^Eukaryota; Viridiplantae; Streptophyta; Embryophyta; Tracheophyta; Spermatophyta; Magnoliophyta; eudicotyledons; Gunneridae; Pentapetalae; rosids; malvids; Brassicales; Brassicaceae; Camelineae; Arabidopsis	PF00191.19	Annexin	Annexin	ENOG410XPUN	annexin A7	.	.	.	GO:0009737|response to abscisic acid;GO:0009409|response to cold;GO:0009408|response to heat;GO:0006970|response to osmotic stress;GO:0009651|response to salt stress;GO:0009414|response to water deprivation	GO:0005509|calcium ion binding;GO:0005544|calcium-dependent phospholipid binding;GO:0003729|mRNA bindingGO:0005509|calcium ion binding;GO:0005544|calcium-dependent phospholipid binding	GO:0009506|plasmodesma
f3p60_1294_26869	-4.06046	0	down	yes	-3.31697	0	down	yes	-2.69257	8.39019e-297	down	yes	-0.94413	NA	down	no	-1.99968	3.28194e-131	down	yes	Gene.13475::PuPacbio_f3p60_1294_transcript26869_g1::g.13475::m.13475	63-1004[+]	gi|743904013|ref|XM_011047069.1|	2013	E:0	PREDICTED: Populus euphratica probable 2-oxoglutarate-dependent dioxygenase AOP1 (LOC105140289), mRNA	gi|224054172|ref|XP_002298127.1|	640	E:0	oxidoreductase family protein [Populus trichocarpa]	AOP1L_ARATH	259	E:6e-81	RecName: Full=Probable 2-oxoglutarate-dependent dioxygenase AOP1.2;^Eukaryota; Viridiplantae; Streptophyta; Embryophyta; Tracheophyta; Spermatophyta; Magnoliophyta; eudicotyledons; Gunneridae; Pentapetalae; rosids; malvids; Brassicales; Brassicaceae; Camelineae; Arabidopsis	AOP1L_ARATH	259	E:1e-82	RecName: Full=Probable 2-oxoglutarate-dependent dioxygenase AOP1.2;^Eukaryota; Viridiplantae; Streptophyta; Embryophyta; Tracheophyta; Spermatophyta; Magnoliophyta; eudicotyledons; Gunneridae; Pentapetalae; rosids; malvids; Brassicales; Brassicaceae; Camelineae; Arabidopsis	PF14226.5	DIOX_N	non-haem dioxygenase in morphine synthesis N-terminal	COG3491	2OGFe(II) oxygenase	.	.	.	GO:0055114|oxidation-reduction process	GO:0051213|dioxygenase activity;GO:0046872|metal ion bindingGO:0016491|oxidoreductase activity	.
f4p60_1149_28512	-2.12684	1.26844e-212	down	yes	-1.77574	1.15754e-182	down	yes	-1.09445	6.43343e-55	down	yes	-1.21861	1.67486e-51	down	yes	-0.897596	3.37425e-47	down	no	Gene.14198::PuPacbio_f4p60_1149_transcript28512_g3::g.14198::m.14198	2-985[+]	gi|566149598|ref|XM_002298092.2|	1727	E:0	Populus trichocarpa hypothetical protein (POPTR_0001s17630g) mRNA, complete cds	gi|566149599|ref|XP_002298128.2|	650	E:0	hypothetical protein POPTR_0001s17630g [Populus trichocarpa]	AOP1V_ARATH	220	E:6e-67	RecName: Full=Probable 2-oxoglutarate-dependent dioxygenase AOP1;^Eukaryota; Viridiplantae; Streptophyta; Embryophyta; Tracheophyta; Spermatophyta; Magnoliophyta; eudicotyledons; Gunneridae; Pentapetalae; rosids; malvids; Brassicales; Brassicaceae; Camelineae; Arabidopsis	AOP1V_ARATH	220	E:2e-67	RecName: Full=Probable 2-oxoglutarate-dependent dioxygenase AOP1;^Eukaryota; Viridiplantae; Streptophyta; Embryophyta; Tracheophyta; Spermatophyta; Magnoliophyta; eudicotyledons; Gunneridae; Pentapetalae; rosids; malvids; Brassicales; Brassicaceae; Camelineae; Arabidopsis	PF14226.5	DIOX_N	non-haem dioxygenase in morphine synthesis N-terminal	COG3491	2OGFe(II) oxygenase	.	.	.	GO:0055114|oxidation-reduction process	GO:0051213|dioxygenase activity;GO:0046872|metal ion bindingGO:0016491|oxidoreductase activity	.
f7p60_1528_6951	3.9835	0	up	yes	4.1117	0	up	yes	3.42584	2.81988e-232	up	yes	3.11525	1.09862e-189	up	yes	2.7061	3.18463e-64	up	yes	Gene.4563::PuPacbio_f7p60_1528_transcript6951_g2::g.4563::m.4563	157-1125[+]	gi|566184260|ref|XM_006379803.1|	1847	E:0	Populus trichocarpa hypothetical protein (POPTR_0008s16150g) mRNA, complete cds	gi|118481558|gb|ABK92721.1|	538	E:0	unknown [Populus trichocarpa]	AOR_ARATH	409	E:4e-137	RecName: Full=NADPH-dependent alkenal/one oxidoreductase, chloroplastic {ECO:0000303|PubMed:21169366};^Eukaryota; Viridiplantae; Streptophyta; Embryophyta; Tracheophyta; Spermatophyta; Magnoliophyta; eudicotyledons; Gunneridae; Pentapetalae; rosids; malvids; Brassicales; Brassicaceae; Camelineae; Arabidopsis	AOR_ARATH	476	E:2e-166	RecName: Full=NADPH-dependent alkenal/one oxidoreductase, chloroplastic {ECO:0000303|PubMed:21169366};^Eukaryota; Viridiplantae; Streptophyta; Embryophyta; Tracheophyta; Spermatophyta; Magnoliophyta; eudicotyledons; Gunneridae; Pentapetalae; rosids; malvids; Brassicales; Brassicaceae; Camelineae; Arabidopsis	PF08240.11	ADH_N	Alcohol dehydrogenase GroES-like domain	COG0604	alcohol dehydrogenase	.	.	.	GO:0055114|oxidation-reduction process;GO:0009409|response to coldGO:0055114|oxidation-reduction process	GO:0035798|2-alkenal reductase (NADP+) activity;GO:0035671|enone reductase activity;GO:0008270|zinc ion binding	GO:0048046|apoplast;GO:0009507|chloroplast;GO:0009941|chloroplast envelope;GO:0009570|chloroplast stroma;GO:0010319|stromule;GO:0009579|thylakoid
f3p60_1416_25856	-1.6851	5.17943e-33	down	yes	-0.850863	3.23523e-13	down	no	0.214972	0.0351829	up	no	0.997316	2.53565e-21	up	no	1.46397	1.06155e-12	up	yes	Gene.13001::PuPacbio_f3p60_1416_transcript25856_g2::g.13001::m.13001	1-1158[+]	gi|566210243|ref|XM_002323632.2|	2364	E:0	Populus trichocarpa hypothetical protein (POPTR_0016s14310g) mRNA, complete cds	gi|743917244|ref|XP_011002607.1|	704	E:0	PREDICTED: 2-methylene-furan-3-one reductase-like [Populus euphratica]	AOR_ARATH	506	E:6e-176	RecName: Full=NADPH-dependent alkenal/one oxidoreductase, chloroplastic {ECO:0000303|PubMed:21169366};^Eukaryota; Viridiplantae; Streptophyta; Embryophyta; Tracheophyta; Spermatophyta; Magnoliophyta; eudicotyledons; Gunneridae; Pentapetalae; rosids; malvids; Brassicales; Brassicaceae; Camelineae; Arabidopsis	AOR_ARATH	542	E:0	RecName: Full=NADPH-dependent alkenal/one oxidoreductase, chloroplastic {ECO:0000303|PubMed:21169366};^Eukaryota; Viridiplantae; Streptophyta; Embryophyta; Tracheophyta; Spermatophyta; Magnoliophyta; eudicotyledons; Gunneridae; Pentapetalae; rosids; malvids; Brassicales; Brassicaceae; Camelineae; Arabidopsis	PF08240.11	ADH_N	Alcohol dehydrogenase GroES-like domain	COG0604	alcohol dehydrogenase	.	.	.	GO:0055114|oxidation-reduction process;GO:0009409|response to coldGO:0055114|oxidation-reduction process	GO:0035798|2-alkenal reductase (NADP+) activity;GO:0035671|enone reductase activity;GO:0008270|zinc ion binding	GO:0048046|apoplast;GO:0009507|chloroplast;GO:0009941|chloroplast envelope;GO:0009570|chloroplast stroma;GO:0010319|stromule;GO:0009579|thylakoid
f2p28_2029_4192	2.0326	8.2539e-87	up	yes	2.57074	9.21083e-178	up	yes	1.91367	1.59766e-75	up	yes	1.68126	NA	up	no	1.30885	1.83647e-11	up	yes	Gene.3134::PuPacbio_f2p28_2029_transcript4192_g1::g.3134::m.3134	94-1674[+]	gi|566202326|ref|XM_006374975.1|	3312	E:0	Populus trichocarpa hypothetical protein (POPTR_0014s03820g) mRNA, complete cds	gi|566202327|ref|XP_006375037.1|	1027	E:0	hypothetical protein POPTR_0014s03820g [Populus trichocarpa]	AOS1_SOLLC	734	E:0	RecName: Full=Allene oxide synthase 1, chloroplastic {ECO:0000303|PubMed:12351632};^Eukaryota; Viridiplantae; Streptophyta; Embryophyta; Tracheophyta; Spermatophyta; Magnoliophyta; eudicotyledons; Gunneridae; Pentapetalae; asterids; lamiids; Solanales; Solanaceae; Solanoideae; Solaneae; Solanum; Lycopersicon	AOS1_SOLLC	745	E:0	RecName: Full=Allene oxide synthase 1, chloroplastic {ECO:0000303|PubMed:12351632};^Eukaryota; Viridiplantae; Streptophyta; Embryophyta; Tracheophyta; Spermatophyta; Magnoliophyta; eudicotyledons; Gunneridae; Pentapetalae; asterids; lamiids; Solanales; Solanaceae; Solanoideae; Solaneae; Solanum; Lycopersicon	PF00067.21	p450	Cytochrome P450	ENOG410ZAGU	Allene oxide synthase	.	.	.	GO:0006952|defense response;GO:0009695|jasmonic acid biosynthetic process;GO:0031408|oxylipin biosynthetic process;GO:0016125|sterol metabolic processGO:0055114|oxidation-reduction process	GO:0020037|heme binding;GO:0047987|hydroperoxide dehydratase activity;GO:0005506|iron ion binding;GO:0004497|monooxygenase activity;GO:0016705|oxidoreductase activity, acting on paired donors, with incorporation or reduction of molecular oxygenGO:0005506|iron ion binding;GO:0016705|oxidoreductase activity, acting on paired donors, with incorporation or reduction of molecular oxygen;GO:0020037|hem…	GO:0009941|chloroplast envelope;GO:0009535|chloroplast thylakoid membrane
f3p60_1590_24570	-1.16321	1.69836e-62	down	yes	-1.63604	1.22185e-122	down	yes	-1.66922	6.1733e-81	down	yes	-1.6008	NA	down	no	-1.31681	3.26766e-39	down	yes	Gene.12348::PuPacbio_f3p60_1590_transcript24570_g3::g.12348::m.12348	245-1300[+]	gi|743915825|ref|XM_011003570.1|	2191	E:0	PREDICTED: Populus euphratica ubiquinol oxidase 2, mitochondrial-like (LOC105109009), mRNA	gi|566196269|ref|XP_002317755.2|	653	E:0	hypothetical protein POPTR_0012s01630g [Populus trichocarpa]	AOX1A_ARATH	466	E:1e-159	RecName: Full=Ubiquinol oxidase 1a, mitochondrial;^Eukaryota; Viridiplantae; Streptophyta; Embryophyta; Tracheophyta; Spermatophyta; Magnoliophyta; eudicotyledons; Gunneridae; Pentapetalae; rosids; malvids; Brassicales; Brassicaceae; Camelineae; Arabidopsis	AOX1A_ARATH	496	E:2e-174	RecName: Full=Ubiquinol oxidase 1a, mitochondrial;^Eukaryota; Viridiplantae; Streptophyta; Embryophyta; Tracheophyta; Spermatophyta; Magnoliophyta; eudicotyledons; Gunneridae; Pentapetalae; rosids; malvids; Brassicales; Brassicaceae; Camelineae; Arabidopsis	PF01786.16	AOX	Alternative oxidase	ENOG410YFEH	alternative oxidase	.	.	.	GO:0045333|cellular respiration;GO:0031930|mitochondria-nucleus signaling pathway;GO:0009409|response to coldGO:0055114|oxidation-reduction process	GO:0009916|alternative oxidase activity;GO:0046872|metal ion bindingGO:0009916|alternative oxidase activity	GO:0016021|integral component of membrane;GO:0005743|mitochondrial inner membrane;GO:0005739|mitochondrion;GO:0070469|respiratory chain
f2p60_1635_24292	-0.304581	0.0305837	down	no	-1.03298	9.51871e-11	down	yes	-0.45258	0.00165034	down	no	-0.936898	4.9622e-07	down	no	-0.898607	8.86842e-06	down	no	Gene.12188::PuPacbio_f2p60_1635_transcript24292_g4::g.12188::m.12188	813-1340[+]	gi|743915825|ref|XM_011003570.1|	1147	E:0	PREDICTED: Populus euphratica ubiquinol oxidase 2, mitochondrial-like (LOC105109009), mRNA	gi|566196269|ref|XP_002317755.2|	637	E:0	hypothetical protein POPTR_0012s01630g [Populus trichocarpa]	AOX1A_ARATH	449	E:4e-153	RecName: Full=Ubiquinol oxidase 1a, mitochondrial;^Eukaryota; Viridiplantae; Streptophyta; Embryophyta; Tracheophyta; Spermatophyta; Magnoliophyta; eudicotyledons; Gunneridae; Pentapetalae; rosids; malvids; Brassicales; Brassicaceae; Camelineae; Arabidopsis	AOX1A_ARATH	341	E:1e-116	RecName: Full=Ubiquinol oxidase 1a, mitochondrial;^Eukaryota; Viridiplantae; Streptophyta; Embryophyta; Tracheophyta; Spermatophyta; Magnoliophyta; eudicotyledons; Gunneridae; Pentapetalae; rosids; malvids; Brassicales; Brassicaceae; Camelineae; Arabidopsis	PF01786.16	AOX	Alternative oxidase	ENOG410YFEH	alternative oxidase	.	.	.	GO:0045333|cellular respiration;GO:0031930|mitochondria-nucleus signaling pathway;GO:0009409|response to coldGO:0055114|oxidation-reduction process	GO:0009916|alternative oxidase activity;GO:0046872|metal ion bindingGO:0009916|alternative oxidase activity	GO:0016021|integral component of membrane;GO:0005743|mitochondrial inner membrane;GO:0005739|mitochondrion;GO:0070469|respiratory chain
f3p60_2065_3988	-1.39134	7.18794e-138	down	yes	-0.661282	5.66035e-27	down	no	-0.407638	1.0456e-09	down	no	0.0536398	0.5697	up	no	0.120168	0.102921	up	no	Gene.3027::PuPacbio_f3p60_2065_transcript3988_g1::g.3027::m.3027	145-1692[+]	gi|566153149|ref|XM_002298791.2|	3454	E:0	Populus trichocarpa aspartic protease family protein (POPTR_0001s36700g) mRNA, complete cds	gi|566153150|ref|XP_002298827.2|	1040	E:0	aspartic protease family protein [Populus trichocarpa]	APA1_ARATH	800	E:0	RecName: Full=Aspartic proteinase A1;^Eukaryota; Viridiplantae; Streptophyta; Embryophyta; Tracheophyta; Spermatophyta; Magnoliophyta; eudicotyledons; Gunneridae; Pentapetalae; rosids; malvids; Brassicales; Brassicaceae; Camelineae; Arabidopsis	APA1_ARATH	803	E:0	RecName: Full=Aspartic proteinase A1;^Eukaryota; Viridiplantae; Streptophyta; Embryophyta; Tracheophyta; Spermatophyta; Magnoliophyta; eudicotyledons; Gunneridae; Pentapetalae; rosids; malvids; Brassicales; Brassicaceae; Camelineae; Arabidopsis	PF00026.22	Asp	Eukaryotic aspartyl protease	ENOG410XNV7	aspartic	.	ExpAA=20.70^PredHel=1^Topology=i7-29o	.	GO:0006629|lipid metabolic process;GO:0030163|protein catabolic process;GO:0006508|proteolysis;GO:0009735|response to cytokinin;GO:0009651|response to salt stressGO:0006629|lipid metabolic process	GO:0004190|aspartic-type endopeptidase activity;GO:0004175|endopeptidase activity	GO:0005829|cytosol;GO:0009506|plasmodesma;GO:0005773|vacuole
f2p60_572_35618	-1.14466	2.40709e-07	down	yes	-0.11444	0.540941	down	no	-0.356662	0.05882	down	no	-0.117218	0.49134	down	no	-0.115804	0.478272	down	no	.	.	gi|566165118|ref|XM_002305705.2|	933	E:0	Populus trichocarpa hypothetical protein (POPTR_0004s05710g) mRNA, complete cds	gi|224079079|ref|XP_002305741.1|	94.4	E:2e-22	hypothetical protein POPTR_0004s05710g [Populus trichocarpa]	APC13_ARATH	63.9	E:2e-12	RecName: Full=Anaphase-promoting complex subunit 13 {ECO:0000303|PubMed:17627280};^Eukaryota; Viridiplantae; Streptophyta; Embryophyta; Tracheophyta; Spermatophyta; Magnoliophyta; eudicotyledons; Gunneridae; Pentapetalae; rosids; malvids; Brassicales; Brassicaceae; Camelineae; Arabidopsis	.	.	.	.	.	.	.	.	.	.	.	.	GO:0007049|cell cycle;GO:0051301|cell division;GO:0010229|inflorescence development;GO:0048827|phyllome development;GO:0010152|pollen maturation;GO:0061614|pri-miRNA transcription from RNA polymerase II promoter;GO:0016567|protein ubiquitination	.	GO:0005680|anaphase-promoting complex
f2p56_1557_6690	0.175397	0.611185	up	no	-0.471827	0.197366	down	no	1.19839	4.30598e-06	up	yes	0.514643	0.0911672	up	no	-0.00203934	0.99439	down	no	Gene.4421::PuPacbio_f2p56_1557_transcript6690_g1::g.4421::m.4421	3-1412[+]	gi|566183460|ref|XM_002311396.2|	2772	E:0	Populus trichocarpa hypothetical protein (POPTR_0008s11480g) mRNA, complete cds	gi|566183461|ref|XP_002311432.2|	811	E:0	hypothetical protein POPTR_0008s11480g [Populus trichocarpa]	APF2_ARATH	201	E:3e-56	RecName: Full=Aspartyl protease family protein 2 {ECO:0000305};^Eukaryota; Viridiplantae; Streptophyta; Embryophyta; Tracheophyta; Spermatophyta; Magnoliophyta; eudicotyledons; Gunneridae; Pentapetalae; rosids; malvids; Brassicales; Brassicaceae; Camelineae; Arabidopsis	APF2_ARATH	210	E:3e-60	RecName: Full=Aspartyl protease family protein 2 {ECO:0000305};^Eukaryota; Viridiplantae; Streptophyta; Embryophyta; Tracheophyta; Spermatophyta; Magnoliophyta; eudicotyledons; Gunneridae; Pentapetalae; rosids; malvids; Brassicales; Brassicaceae; Camelineae; Arabidopsis	PF00026.22	Asp	Eukaryotic aspartyl protease	ENOG410XNV7	aspartic	.	.	.	GO:0030163|protein catabolic process;GO:0006508|proteolysis;GO:0080167|response to karrikin	GO:0004190|aspartic-type endopeptidase activity	GO:0016020|membrane;GO:0009505|plant-type cell wall
f2p53_576_35504	0.90631	1.265e-06	up	no	1.10605	7.04041e-13	up	yes	0.759336	7.06589e-06	up	no	0.495803	0.00686325	up	no	0.330851	0.07437	up	no	.	.	gi|566158496|ref|XM_002302598.2|	922	E:0	Populus trichocarpa aspartyl protease family protein (POPTR_0002s17270g) mRNA, complete cds	gi|566158497|ref|XP_002302634.2|	97.8	E:4e-21	aspartyl protease family protein [Populus trichocarpa]	APF2_ARATH	85.9	E:4e-18	RecName: Full=Aspartyl protease family protein 2 {ECO:0000305};^Eukaryota; Viridiplantae; Streptophyta; Embryophyta; Tracheophyta; Spermatophyta; Magnoliophyta; eudicotyledons; Gunneridae; Pentapetalae; rosids; malvids; Brassicales; Brassicaceae; Camelineae; Arabidopsis	.	.	.	.	.	.	.	ENOG410XNV7	aspartic	.	.	.	GO:0030163|protein catabolic process;GO:0006508|proteolysis;GO:0080167|response to karrikin	GO:0004190|aspartic-type endopeptidase activity	GO:0016020|membrane;GO:0009505|plant-type cell wall
f2p55_1390_7772	1.36486	0.000808173	up	yes	2.10176	9.32551e-10	up	yes	4.03921	1.94309e-60	up	yes	2.2806	2.03008e-14	up	yes	1.75723	1.27103e-08	up	yes	Gene.4923::PuPacbio_f2p55_1390_transcript7772_g1::g.4923::m.4923	16-1074[+]	gi|566149860|ref|XM_002298213.2|	2244	E:0	Populus trichocarpa putative proline-rich protein APG isolog (POPTR_0001s19220g) mRNA, complete cds	gi|566149861|ref|XP_002298249.2|	687	E:0	putative proline-rich protein APG isolog [Populus trichocarpa]	APG2_ARATH	528	E:0	RecName: Full=GDSL esterase/lipase APG;^Eukaryota; Viridiplantae; Streptophyta; Embryophyta; Tracheophyta; Spermatophyta; Magnoliophyta; eudicotyledons; Gunneridae; Pentapetalae; rosids; malvids; Brassicales; Brassicaceae; Camelineae; Arabidopsis	APG2_ARATH	529	E:0	RecName: Full=GDSL esterase/lipase APG;^Eukaryota; Viridiplantae; Streptophyta; Embryophyta; Tracheophyta; Spermatophyta; Magnoliophyta; eudicotyledons; Gunneridae; Pentapetalae; rosids; malvids; Brassicales; Brassicaceae; Camelineae; Arabidopsis	PF00657.21	Lipase_GDSL	GDSL-like Lipase/Acylhydrolase	COG3240	GDSL esterase lipase	.	.	.	GO:0016042|lipid catabolic process	GO:0016788|hydrolase activity, acting on ester bondsGO:0016788|hydrolase activity, acting on ester bonds	GO:0048046|apoplast
f2p35_1882_4853	2.2321	0	up	yes	1.44683	4.53855e-223	up	yes	0.576856	1.53534e-23	up	no	0.0233657	NA	up	no	-0.17194	0.00322466	down	no	Gene.3489::PuPacbio_f2p35_1882_transcript4853_g1::g.3489::m.3489	85-1482[+]	gi|743885648|ref|XM_011039314.1|	3018	E:0	PREDICTED: Populus euphratica 5'-adenylylsulfate reductase 3, chloroplastic-like (LOC105134776), mRNA	gi|118485828|gb|ABK94761.1|	878	E:0	unknown [Populus trichocarpa]	APR1_ARATH	694	E:0	RecName: Full=5'-adenylylsulfate reductase 1, chloroplastic;^Eukaryota; Viridiplantae; Streptophyta; Embryophyta; Tracheophyta; Spermatophyta; Magnoliophyta; eudicotyledons; Gunneridae; Pentapetalae; rosids; malvids; Brassicales; Brassicaceae; Camelineae; Arabidopsis	APR3_ARATH	716	E:0	RecName: Full=5'-adenylylsulfate reductase 3, chloroplastic;^Eukaryota; Viridiplantae; Streptophyta; Embryophyta; Tracheophyta; Spermatophyta; Magnoliophyta; eudicotyledons; Gunneridae; Pentapetalae; rosids; malvids; Brassicales; Brassicaceae; Camelineae; Arabidopsis	PF01507.18	PAPS_reduct	Phosphoadenosine phosphosulfate reductase family	COG0175	Reduction of activated sulfate into sulfite (By similarity)	.	.	.	GO:0045454|cell redox homeostasis;GO:0019344|cysteine biosynthetic process;GO:0000103|sulfate assimilation;GO:0019419|sulfate reductionGO:0008152|metabolic process;GO:0045454|cell redox homeostasis	GO:0051539|4 iron, 4 sulfur cluster binding;GO:0033741|adenylyl-sulfate reductase (glutathione) activity;GO:0009973|adenylyl-sulfate reductase activity;GO:0046872|metal ion binding;GO:0004604|phosphoadenylyl-sulfate reductase (thioredoxin) activityGO:0003824|catalytic activity	GO:0009507|chloroplast
f2p60_1697_23846	4.14191	1.00962e-180	up	yes	2.65702	1.3344e-51	up	yes	1.33061	1.51854e-09	up	yes	0.173096	0.49328	up	no	0.347951	0.146291	up	no	Gene.11972::PuPacbio_f2p60_1697_transcript23846_g4::g.11972::m.11972	72-1292[+]	gi|743907645|ref|XM_011048952.1|	2593	E:0	PREDICTED: Populus euphratica 5'-adenylylsulfate reductase 3, chloroplastic-like (LOC105141663), transcript variant X1, mRNA	gi|743907646|ref|XP_011047254.1|	747	E:0	PREDICTED: 5'-adenylylsulfate reductase 3, chloroplastic-like isoform X1 [Populus euphratica]	APR3_ARATH	355	E:1e-114	RecName: Full=5'-adenylylsulfate reductase 3, chloroplastic;^Eukaryota; Viridiplantae; Streptophyta; Embryophyta; Tracheophyta; Spermatophyta; Magnoliophyta; eudicotyledons; Gunneridae; Pentapetalae; rosids; malvids; Brassicales; Brassicaceae; Camelineae; Arabidopsis	APR3_ARATH	384	E:3e-128	RecName: Full=5'-adenylylsulfate reductase 3, chloroplastic;^Eukaryota; Viridiplantae; Streptophyta; Embryophyta; Tracheophyta; Spermatophyta; Magnoliophyta; eudicotyledons; Gunneridae; Pentapetalae; rosids; malvids; Brassicales; Brassicaceae; Camelineae; Arabidopsis	PF01507.18	PAPS_reduct	Phosphoadenosine phosphosulfate reductase family	COG0175	Reduction of activated sulfate into sulfite (By similarity)	.	ExpAA=15.43^PredHel=1^Topology=i21-43o	.	GO:0045454|cell redox homeostasis;GO:0019344|cysteine biosynthetic process;GO:0000103|sulfate assimilation;GO:0019419|sulfate reductionGO:0008152|metabolic process	GO:0051539|4 iron, 4 sulfur cluster binding;GO:0033741|adenylyl-sulfate reductase (glutathione) activity;GO:0009973|adenylyl-sulfate reductase activity;GO:0046872|metal ion binding;GO:0004604|phosphoadenylyl-sulfate reductase (thioredoxin) activityGO:0003824|catalytic activity	GO:0009507|chloroplast
f3p60_1765_23380	4.09532	4.75126e-212	up	yes	2.55134	1.87856e-59	up	yes	1.58918	5.47203e-18	up	yes	0.715379	0.000357282	up	no	0.920005	3.72072e-06	up	no	Gene.11708::PuPacbio_f3p60_1765_transcript23380_g2::g.11708::m.11708	72-1274[+]	gi|743907647|ref|XM_011048953.1|	2715	E:0	PREDICTED: Populus euphratica 5'-adenylylsulfate reductase 3, chloroplastic-like (LOC105141663), transcript variant X2, mRNA	gi|743907648|ref|XP_011047255.1|	732	E:0	PREDICTED: 5'-adenylylsulfate reductase 3, chloroplastic-like isoform X2 [Populus euphratica]	APR3_ARATH	353	E:1e-113	RecName: Full=5'-adenylylsulfate reductase 3, chloroplastic;^Eukaryota; Viridiplantae; Streptophyta; Embryophyta; Tracheophyta; Spermatophyta; Magnoliophyta; eudicotyledons; Gunneridae; Pentapetalae; rosids; malvids; Brassicales; Brassicaceae; Camelineae; Arabidopsis	APR3_ARATH	383	E:1e-127	RecName: Full=5'-adenylylsulfate reductase 3, chloroplastic;^Eukaryota; Viridiplantae; Streptophyta; Embryophyta; Tracheophyta; Spermatophyta; Magnoliophyta; eudicotyledons; Gunneridae; Pentapetalae; rosids; malvids; Brassicales; Brassicaceae; Camelineae; Arabidopsis	PF01507.18	PAPS_reduct	Phosphoadenosine phosphosulfate reductase family	COG0175	Reduction of activated sulfate into sulfite (By similarity)	.	.	.	GO:0045454|cell redox homeostasis;GO:0019344|cysteine biosynthetic process;GO:0000103|sulfate assimilation;GO:0019419|sulfate reductionGO:0008152|metabolic process	GO:0051539|4 iron, 4 sulfur cluster binding;GO:0033741|adenylyl-sulfate reductase (glutathione) activity;GO:0009973|adenylyl-sulfate reductase activity;GO:0046872|metal ion binding;GO:0004604|phosphoadenylyl-sulfate reductase (thioredoxin) activityGO:0003824|catalytic activity	GO:0009507|chloroplast
f2p31_2453_2844	0.896479	0.00112044	up	no	0.879625	0.000761251	up	no	0.969491	0.000100068	up	no	0.902512	0.000244661	up	no	1.20869	5.92606e-07	up	yes	Gene.2329::PuPacbio_f2p31_2453_transcript2844_g1::g.2329::m.2329	215-1864[+]	gi|743848507|ref|XM_011029949.1|	3181	E:0	PREDICTED: Populus euphratica two-component response regulator-like APRR2 (LOC105128338), partial mRNA	gi|566161617|ref|XP_006385611.1|	1051	E:0	hypothetical protein POPTR_0003s08600g [Populus trichocarpa]	APRR2_ARATH	392	E:8e-125	RecName: Full=Two-component response regulator-like APRR2;^Eukaryota; Viridiplantae; Streptophyta; Embryophyta; Tracheophyta; Spermatophyta; Magnoliophyta; eudicotyledons; Gunneridae; Pentapetalae; rosids; malvids; Brassicales; Brassicaceae; Camelineae; Arabidopsis	APRR2_ARATH	418	E:3e-138	RecName: Full=Two-component response regulator-like APRR2;^Eukaryota; Viridiplantae; Streptophyta; Embryophyta; Tracheophyta; Spermatophyta; Magnoliophyta; eudicotyledons; Gunneridae; Pentapetalae; rosids; malvids; Brassicales; Brassicaceae; Camelineae; Arabidopsis	PF00072.23	Response_reg	Response regulator receiver domain	COG5641	Transcription factor	.	.	.	GO:0000160|phosphorelay signal transduction system;GO:0006351|transcription, DNA-templatedGO:0000160|phosphorelay signal transduction system	GO:0003677|DNA binding;GO:0003700|transcription factor activity, sequence-specific DNA binding	GO:0005634|nucleus
f2p17_2460_20530	1.08375	4.13848e-05	up	yes	1.03645	2.2342e-05	up	yes	1.18085	2.05199e-06	up	yes	0.87959	0.00045154	up	no	0.732488	0.00424516	up	no	Gene.9852::PuPacbio_f2p17_2460_transcript20530_g1::g.9852::m.9852	259-1716[+]	gi|743809951|ref|XM_011020325.1|	3819	E:0	PREDICTED: Populus euphratica two-component response regulator-like APRR2 (LOC105121606), transcript variant X1, mRNA	gi|566146891|ref|XP_006368449.1|	932	E:0	hypothetical protein POPTR_0001s02910g [Populus trichocarpa]	APRR2_ARATH	405	E:1e-129	RecName: Full=Two-component response regulator-like APRR2;^Eukaryota; Viridiplantae; Streptophyta; Embryophyta; Tracheophyta; Spermatophyta; Magnoliophyta; eudicotyledons; Gunneridae; Pentapetalae; rosids; malvids; Brassicales; Brassicaceae; Camelineae; Arabidopsis	APRR2_ARATH	411	E:1e-136	RecName: Full=Two-component response regulator-like APRR2;^Eukaryota; Viridiplantae; Streptophyta; Embryophyta; Tracheophyta; Spermatophyta; Magnoliophyta; eudicotyledons; Gunneridae; Pentapetalae; rosids; malvids; Brassicales; Brassicaceae; Camelineae; Arabidopsis	PF00072.23	Response_reg	Response regulator receiver domain	COG5641	Transcription factor	.	.	.	GO:0000160|phosphorelay signal transduction system;GO:0006351|transcription, DNA-templatedGO:0000160|phosphorelay signal transduction system	GO:0003677|DNA binding;GO:0003700|transcription factor activity, sequence-specific DNA binding	GO:0005634|nucleus
f2p42_1919_4627	2.29058	0	up	yes	0.914149	1.48656e-74	up	no	0.163387	0.00744211	up	no	0.0420902	NA	up	no	0.0728038	0.31523	up	no	Gene.3364::PuPacbio_f2p42_1919_transcript4627_g1::g.3364::m.3364	160-1548[+]	gi|566184217|ref|XM_002311611.2|	3301	E:0	Populus trichocarpa ATP sulfurylase family protein (POPTR_0008s15880g) mRNA, complete cds	gi|224099857|ref|XP_002311647.1|	944	E:0	ATP sulfurylase family protein [Populus trichocarpa]	APS1_ARATH	763	E:0	RecName: Full=ATP sulfurylase 1, chloroplastic;^Eukaryota; Viridiplantae; Streptophyta; Embryophyta; Tracheophyta; Spermatophyta; Magnoliophyta; eudicotyledons; Gunneridae; Pentapetalae; rosids; malvids; Brassicales; Brassicaceae; Camelineae; Arabidopsis	APS1_ARATH	764	E:0	RecName: Full=ATP sulfurylase 1, chloroplastic;^Eukaryota; Viridiplantae; Streptophyta; Embryophyta; Tracheophyta; Spermatophyta; Magnoliophyta; eudicotyledons; Gunneridae; Pentapetalae; rosids; malvids; Brassicales; Brassicaceae; Camelineae; Arabidopsis	PF14306.5	PUA_2	PUA-like domain	COG2046	Catalyzes the first intracellular reaction of sulfate assimilation, forming adenosine-5'-phosphosulfate (APS) from inorganic sulfate and ATP. Plays an important role in sulfate activation as a component of the biosynthesis pathway of sulfur- containing amino acids (By similarity)	.	.	.	GO:0070814|hydrogen sulfide biosynthetic process;GO:0046686|response to cadmium ion;GO:0009735|response to cytokinin;GO:0001887|selenium compound metabolic process;GO:0000103|sulfate assimilation	GO:0004020|adenylylsulfate kinase activity;GO:0005524|ATP binding;GO:0004781|sulfate adenylyltransferase (ATP) activityGO:0004781|sulfate adenylyltransferase (ATP) activity	GO:0009507|chloroplast;GO:0009570|chloroplast stroma;GO:0005886|plasma membrane
f2p60_1990_4373	1.01853	2.49553e-17	up	yes	0.539269	2.5815e-05	up	no	0.76515	1.08779e-09	up	no	0.384361	0.00236434	up	no	0.202444	0.175172	up	no	Gene.3236::PuPacbio_f2p60_1990_transcript4373_g3::g.3236::m.3236	230-1675[+]	gi|743903533|ref|XM_011046813.1|	3338	E:0	PREDICTED: Populus euphratica ATP sulfurylase 2-like (LOC105140118), mRNA	gi|566173273|ref|XP_002307709.2|	950	E:0	hypothetical protein POPTR_0005s25850g [Populus trichocarpa]	APS2_ARATH	738	E:0	RecName: Full=ATP sulfurylase 2;^Eukaryota; Viridiplantae; Streptophyta; Embryophyta; Tracheophyta; Spermatophyta; Magnoliophyta; eudicotyledons; Gunneridae; Pentapetalae; rosids; malvids; Brassicales; Brassicaceae; Camelineae; Arabidopsis	APS2_ARATH	767	E:0	RecName: Full=ATP sulfurylase 2;^Eukaryota; Viridiplantae; Streptophyta; Embryophyta; Tracheophyta; Spermatophyta; Magnoliophyta; eudicotyledons; Gunneridae; Pentapetalae; rosids; malvids; Brassicales; Brassicaceae; Camelineae; Arabidopsis	PF14306.5	PUA_2	PUA-like domain	COG2046	Catalyzes the first intracellular reaction of sulfate assimilation, forming adenosine-5'-phosphosulfate (APS) from inorganic sulfate and ATP. Plays an important role in sulfate activation as a component of the biosynthesis pathway of sulfur- containing amino acids (By similarity)	.	.	.	GO:0009970|cellular response to sulfate starvation;GO:0070814|hydrogen sulfide biosynthetic process;GO:0000103|sulfate assimilation	GO:0004020|adenylylsulfate kinase activity;GO:0005524|ATP binding;GO:0004781|sulfate adenylyltransferase (ATP) activityGO:0004781|sulfate adenylyltransferase (ATP) activity	GO:0009507|chloroplast;GO:0009570|chloroplast stroma;GO:0005829|cytosol
f2p60_1251_9106	-1.12396	4.61163e-68	down	yes	-0.67266	1.46911e-35	down	no	-0.325343	1.48912e-07	down	no	-0.123318	0.100927	down	no	-0.0542362	0.465877	down	no	Gene.5491::PuPacbio_f2p60_1251_transcript9106_g4::g.5491::m.5491	155-904[+]	gi|566176140|ref|XM_006381438.1|	1921	E:0	Populus trichocarpa ascorbate peroxidase family protein (POPTR_0006s13440g) mRNA, complete cds	gi|566176141|ref|XP_006381500.1|	503	E:2e-176	ascorbate peroxidase family protein [Populus trichocarpa]	APX2_ARATH	440	E:4e-153	RecName: Full=L-ascorbate peroxidase 2, cytosolic;^Eukaryota; Viridiplantae; Streptophyta; Embryophyta; Tracheophyta; Spermatophyta; Magnoliophyta; eudicotyledons; Gunneridae; Pentapetalae; rosids; malvids; Brassicales; Brassicaceae; Camelineae; Arabidopsis	APX2_ARATH	441	E:6e-156	RecName: Full=L-ascorbate peroxidase 2, cytosolic;^Eukaryota; Viridiplantae; Streptophyta; Embryophyta; Tracheophyta; Spermatophyta; Magnoliophyta; eudicotyledons; Gunneridae; Pentapetalae; rosids; malvids; Brassicales; Brassicaceae; Camelineae; Arabidopsis	PF00141.22	peroxidase	Peroxidase	COG0376	Bifunctional enzyme with both catalase and broad- spectrum peroxidase activity (By similarity)	.	.	.	GO:0034599|cellular response to oxidative stress;GO:0042744|hydrogen peroxide catabolic process;GO:0006979|response to oxidative stress;GO:0000302|response to reactive oxygen speciesGO:0006979|response to oxidative stress;GO:0055114|oxidation-reduction process	GO:0004130|cytochrome-c peroxidase activity;GO:0020037|heme binding;GO:0016688|L-ascorbate peroxidase activity;GO:0046872|metal ion bindingGO:0004601|peroxidase activity;GO:0020037|heme binding	GO:0009507|chloroplast;GO:0005829|cytosol
f4p60_1598_24509	3.25814	3.19995e-09	up	yes	6.16524	3.09964e-46	up	yes	#N/A	#N/A	#N/A	#N/A	0.125242	0.350845	up	no	#N/A	#N/A	#N/A	#N/A	Gene.12314::PuPacbio_f4p60_1598_transcript24509_g2::g.12314::m.12314	550-1389[+]	gi|118486127|gb|EF146864.1|	2691	E:0	Populus trichocarpa clone WS0121_D02 unknown mRNA	gi|224144743|ref|XP_002325398.1|	679	E:0	putative apyrase family protein [Populus trichocarpa]	APY2_ARATH	394	E:7e-130	RecName: Full=Apyrase 2;^Eukaryota; Viridiplantae; Streptophyta; Embryophyta; Tracheophyta; Spermatophyta; Magnoliophyta; eudicotyledons; Gunneridae; Pentapetalae; rosids; malvids; Brassicales; Brassicaceae; Camelineae; Arabidopsis	APY2_ARATH	317	E:1e-103	RecName: Full=Apyrase 2;^Eukaryota; Viridiplantae; Streptophyta; Embryophyta; Tracheophyta; Spermatophyta; Magnoliophyta; eudicotyledons; Gunneridae; Pentapetalae; rosids; malvids; Brassicales; Brassicaceae; Camelineae; Arabidopsis	PF01150.16	GDA1_CD39	GDA1/CD39 (nucleoside phosphatase) family	.	.	.	.	.	.	GO:0102490|8-oxo-dGTP phosphohydrolase activity;GO:0005524|ATP bindingGO:0016787|hydrolase activity	GO:0000139|Golgi membrane;GO:0016021|integral component of membrane
f4p60_873_12297	1.04317	4.99558e-82	up	yes	0.491792	1.17248e-18	up	no	0.738298	7.80034e-26	up	no	0.148752	NA	up	no	0.255509	0.317827	up	no	Gene.6730::PuPacbio_f4p60_873_transcript12297_g1::g.6730::m.6730	68-613[+]	gi|566198687|ref|XM_006375654.1|	1478	E:0	Populus trichocarpa hypothetical protein (POPTR_0013s00690g) mRNA, complete cds	gi|728821301|gb|KHG04267.1|	379	E:9e-130	ADP-ribosylation factor [Gossypium arboreum]	ARF_VIGUN	374	E:5e-130	RecName: Full=ADP-ribosylation factor;^Eukaryota; Viridiplantae; Streptophyta; Embryophyta; Tracheophyta; Spermatophyta; Magnoliophyta; eudicotyledons; Gunneridae; Pentapetalae; rosids; fabids; Fabales; Fabaceae; Papilionoideae; Phaseoleae; Vigna	ARF_VIGUN	374	E:4e-132	RecName: Full=ADP-ribosylation factor;^Eukaryota; Viridiplantae; Streptophyta; Embryophyta; Tracheophyta; Spermatophyta; Magnoliophyta; eudicotyledons; Gunneridae; Pentapetalae; rosids; fabids; Fabales; Fabaceae; Papilionoideae; Phaseoleae; Vigna	PF00025.20	Arf	ADP-ribosylation factor family	.	.	.	.	.	GO:0015031|protein transport;GO:0007264|small GTPase mediated signal transduction;GO:0016192|vesicle-mediated transport	GO:0005525|GTP bindingGO:0005525|GTP binding;GO:0003924|GTPase activity	GO:0005794|Golgi apparatus
f2p60_598_352883	2.93392	3.73242e-72	up	yes	1.95926	1.01266e-32	up	yes	2.58056	1.11133e-60	up	yes	0.151009	NA	up	no	0.197702	0.344728	up	no	.	.	gi|566198687|ref|XM_006375654.1|	795	E:0	Populus trichocarpa hypothetical protein (POPTR_0013s00690g) mRNA, complete cds	gi|947108260|gb|KRH56586.1|	167	E:1e-49	hypothetical protein GLYMA_05G006000 [Glycine max]	ARF1_ORYSJ	167	E:3e-50	RecName: Full=ADP-ribosylation factor 1;^Eukaryota; Viridiplantae; Streptophyta; Embryophyta; Tracheophyta; Spermatophyta; Magnoliophyta; Liliopsida; Poales; Poaceae; BOP clade; Oryzoideae; Oryzeae; Oryzinae; Oryza	.	.	.	.	.	.	.	COG1100	GTP-binding Protein	.	.	.	GO:0015031|protein transport;GO:0007264|small GTPase mediated signal transduction;GO:0016192|vesicle-mediated transport	GO:0005525|GTP binding	GO:0005794|Golgi apparatus
f5p60_2055_4083	1.55529	1.32957e-201	up	yes	1.05605	7.0743e-89	up	yes	0.486293	7.53861e-16	up	no	0.0922801	0.125031	up	no	-0.110147	0.147954	down	no	Gene.3078::PuPacbio_f5p60_2055_transcript4083_g1::g.3078::m.3078	147-1703[+]	gi|566158067|ref|XM_002301243.2|	3565	E:0	Populus trichocarpa 3-phosphoshikimate 1-carboxyvinyltransferase family protein (POPTR_0002s14740g) mRNA, complete cds	gi|224063774|ref|XP_002301279.1|	1035	E:0	3-phosphoshikimate 1-carboxyvinyltransferase family protein [Populus trichocarpa]	AROA_PETHY	803	E:0	RecName: Full=3-phosphoshikimate 1-carboxyvinyltransferase, chloroplastic;^Eukaryota; Viridiplantae; Streptophyta; Embryophyta; Tracheophyta; Spermatophyta; Magnoliophyta; eudicotyledons; Gunneridae; Pentapetalae; asterids; lamiids; Solanales; Solanaceae; Petunioideae; Petunia	AROA_ARATH	815	E:0	RecName: Full=3-phosphoshikimate 1-carboxyvinyltransferase, chloroplastic;^Eukaryota; Viridiplantae; Streptophyta; Embryophyta; Tracheophyta; Spermatophyta; Magnoliophyta; eudicotyledons; Gunneridae; Pentapetalae; rosids; malvids; Brassicales; Brassicaceae; Camelineae; Arabidopsis	PF00275.19	EPSP_synthase	EPSP synthase (3-phosphoshikimate 1-carboxyvinyltransferase)	COG0128	5-enolpyruvylshikimate-3-phosphate synthase	.	.	.	GO:0009073|aromatic amino acid family biosynthetic process;GO:0009423|chorismate biosynthetic process	GO:0003866|3-phosphoshikimate 1-carboxyvinyltransferase activityGO:0016765|transferase activity, transferring alkyl or aryl (other than methyl) groups	GO:0009507|chloroplast;GO:0009570|chloroplast stroma
f2p50_1721_5718	1.32522	6.97888e-77	up	yes	0.73347	3.86257e-27	up	no	0.000344791	0.996652	up	no	-0.269749	0.00172162	down	no	-0.228936	0.0117439	down	no	Gene.3923::PuPacbio_f2p50_1721_transcript5718_g1::g.3923::m.3923	122-1438[+]	gi|566182263|ref|XM_002311982.2|	2898	E:0	Populus trichocarpa chorismate synthase family protein (POPTR_0008s04040g) mRNA, complete cds	gi|566182264|ref|XP_002312018.2|	809	E:0	chorismate synthase family protein [Populus trichocarpa]	AROC_ARATH	672	E:0	RecName: Full=Chorismate synthase, chloroplastic;^Eukaryota; Viridiplantae; Streptophyta; Embryophyta; Tracheophyta; Spermatophyta; Magnoliophyta; eudicotyledons; Gunneridae; Pentapetalae; rosids; malvids; Brassicales; Brassicaceae; Camelineae; Arabidopsis	AROC_ARATH	748	E:0	RecName: Full=Chorismate synthase, chloroplastic;^Eukaryota; Viridiplantae; Streptophyta; Embryophyta; Tracheophyta; Spermatophyta; Magnoliophyta; eudicotyledons; Gunneridae; Pentapetalae; rosids; malvids; Brassicales; Brassicaceae; Camelineae; Arabidopsis	PF01264.20	Chorismate_synt	Chorismate synthase	COG0082	5-enolpyruvylshikimate-3-phosphate phospholyase	.	.	.	GO:0009073|aromatic amino acid family biosynthetic process;GO:0009423|chorismate biosynthetic processGO:0009073|aromatic amino acid family biosynthetic process	GO:0004107|chorismate synthase activity;GO:0010181|FMN bindingGO:0004107|chorismate synthase activity	GO:0009507|chloroplast;GO:0009570|chloroplast stroma;GO:0005829|cytosol;GO:0005730|nucleolus;GO:0009536|plastid
f3p60_518_15775	1.82969	7.31003e-18	up	yes	1.29224	6.09752e-09	up	yes	1.13391	8.67984e-06	up	yes	0.538237	0.0579629	up	no	-0.179824	0.554467	down	no	Gene.7532::PuPacbio_f3p60_518_transcript15775_g3::g.7532::m.7532	2-325[+]	gi|118487987|gb|EF147814.1|	893	E:0	Populus trichocarpa clone WS0125_D08 unknown mRNA	gi|566167475|ref|XP_006384664.1|	229	E:2e-70	prephenate dehydratase family protein [Populus trichocarpa]	AROD5_ARATH	174	E:7e-51	RecName: Full=Arogenate dehydratase 5, chloroplastic;^Eukaryota; Viridiplantae; Streptophyta; Embryophyta; Tracheophyta; Spermatophyta; Magnoliophyta; eudicotyledons; Gunneridae; Pentapetalae; rosids; malvids; Brassicales; Brassicaceae; Camelineae; Arabidopsis	AROD5_ARATH	174	E:7e-52	RecName: Full=Arogenate dehydratase 5, chloroplastic;^Eukaryota; Viridiplantae; Streptophyta; Embryophyta; Tracheophyta; Spermatophyta; Magnoliophyta; eudicotyledons; Gunneridae; Pentapetalae; rosids; malvids; Brassicales; Brassicaceae; Camelineae; Arabidopsis	.	.	.	COG0077	Prephenate dehydratase	.	.	.	GO:0009094|L-phenylalanine biosynthetic process	GO:0047769|arogenate dehydratase activity	GO:0009507|chloroplast;GO:0009570|chloroplast stroma
f2p60_602_14931	1.32336	6.88811e-27	up	yes	0.715765	1.7526e-10	up	no	0.609176	2.17345e-07	up	no	0.228569	0.194819	up	no	-0.23961	0.175395	down	no	Gene.7437::PuPacbio_f2p60_602_transcript14931_g3::g.7437::m.7437	3-434[+]	gi|566167474|ref|XM_006384602.1|	1046	E:0	Populus trichocarpa prephenate dehydratase family protein (POPTR_0004s19960g) mRNA, complete cds	gi|566167475|ref|XP_006384664.1|	302	E:3e-98	prephenate dehydratase family protein [Populus trichocarpa]	AROD6_ARATH	240	E:8e-76	RecName: Full=Arogenate dehydratase/prephenate dehydratase 6, chloroplastic;^Eukaryota; Viridiplantae; Streptophyta; Embryophyta; Tracheophyta; Spermatophyta; Magnoliophyta; eudicotyledons; Gunneridae; Pentapetalae; rosids; malvids; Brassicales; Brassicaceae; Camelineae; Arabidopsis	AROD6_ARATH	239	E:2e-76	RecName: Full=Arogenate dehydratase/prephenate dehydratase 6, chloroplastic;^Eukaryota; Viridiplantae; Streptophyta; Embryophyta; Tracheophyta; Spermatophyta; Magnoliophyta; eudicotyledons; Gunneridae; Pentapetalae; rosids; malvids; Brassicales; Brassicaceae; Camelineae; Arabidopsis	.	.	.	COG0077	Prephenate dehydratase	.	.	.	GO:0009094|L-phenylalanine biosynthetic process	GO:0047769|arogenate dehydratase activity	GO:0009507|chloroplast;GO:0009570|chloroplast stroma
f2p60_1500_22067	1.06824	5.72548e-37	up	yes	1.23463	6.40532e-74	up	yes	0.396231	1.35169e-05	up	no	0.013441	0.888948	up	no	-0.40115	0.000162679	down	no	Gene.10903::PuPacbio_f2p60_1500_transcript22067_g4::g.10903::m.10903	3-1499[+]	gi|743918066|ref|XM_011004731.1|	2606	E:0	PREDICTED: Populus euphratica phospho-2-dehydro-3-deoxyheptonate aldolase 1, chloroplastic-like (LOC105109870), mRNA	gi|743918067|ref|XP_011003033.1|	853	E:0	PREDICTED: phospho-2-dehydro-3-deoxyheptonate aldolase 1, chloroplastic-like [Populus euphratica]	AROF_TOBAC	749	E:0	RecName: Full=Phospho-2-dehydro-3-deoxyheptonate aldolase 1, chloroplastic;^Eukaryota; Viridiplantae; Streptophyta; Embryophyta; Tracheophyta; Spermatophyta; Magnoliophyta; eudicotyledons; Gunneridae; Pentapetalae; asterids; lamiids; Solanales; Solanaceae; Nicotianoideae; Nicotianeae; Nicotiana	AROF_TOBAC	769	E:0	RecName: Full=Phospho-2-dehydro-3-deoxyheptonate aldolase 1, chloroplastic;^Eukaryota; Viridiplantae; Streptophyta; Embryophyta; Tracheophyta; Spermatophyta; Magnoliophyta; eudicotyledons; Gunneridae; Pentapetalae; asterids; lamiids; Solanales; Solanaceae; Nicotianoideae; Nicotianeae; Nicotiana	PF01474.15	DAHP_synth_2	Class-II DAHP synthetase family	.	.	.	.	.	GO:0009073|aromatic amino acid family biosynthetic process;GO:0009423|chorismate biosynthetic processGO:0009073|aromatic amino acid family biosynthetic process	GO:0003849|3-deoxy-7-phosphoheptulonate synthase activityGO:0003849|3-deoxy-7-phosphoheptulonate synthase activity	GO:0009507|chloroplast
f2p60_1596_24598	1.32963	6.7448e-108	up	yes	1.15732	1.44751e-89	up	yes	0.509451	8.04204e-13	up	no	-0.0697681	0.393849	down	no	-0.447826	2.13478e-08	down	no	Gene.12366::PuPacbio_f2p60_1596_transcript24598_g8::g.12366::m.12366	1-1335[+]	gi|118486264|gb|EF146934.1|	2678	E:0	Populus trichocarpa clone WS01225_C03 unknown mRNA	gi|743918067|ref|XP_011003033.1|	930	E:0	PREDICTED: phospho-2-dehydro-3-deoxyheptonate aldolase 1, chloroplastic-like [Populus euphratica]	AROF_TOBAC	863	E:0	RecName: Full=Phospho-2-dehydro-3-deoxyheptonate aldolase 1, chloroplastic;^Eukaryota; Viridiplantae; Streptophyta; Embryophyta; Tracheophyta; Spermatophyta; Magnoliophyta; eudicotyledons; Gunneridae; Pentapetalae; asterids; lamiids; Solanales; Solanaceae; Nicotianoideae; Nicotianeae; Nicotiana	AROF_TOBAC	863	E:0	RecName: Full=Phospho-2-dehydro-3-deoxyheptonate aldolase 1, chloroplastic;^Eukaryota; Viridiplantae; Streptophyta; Embryophyta; Tracheophyta; Spermatophyta; Magnoliophyta; eudicotyledons; Gunneridae; Pentapetalae; asterids; lamiids; Solanales; Solanaceae; Nicotianoideae; Nicotianeae; Nicotiana	PF01474.15	DAHP_synth_2	Class-II DAHP synthetase family	.	.	.	.	.	GO:0009073|aromatic amino acid family biosynthetic process;GO:0009423|chorismate biosynthetic processGO:0009073|aromatic amino acid family biosynthetic process	GO:0003849|3-deoxy-7-phosphoheptulonate synthase activityGO:0003849|3-deoxy-7-phosphoheptulonate synthase activity	GO:0009507|chloroplast
f2p27_1633_6276	1.196	1.34134e-91	up	yes	1.06302	2.17192e-83	up	yes	0.402874	5.28733e-09	up	no	-0.00966909	0.900056	down	no	-0.342562	5.65186e-05	down	no	Gene.4199::PuPacbio_f2p27_1633_transcript6276_g1::g.4199::m.4199	3-1400[+]	gi|118486264|gb|EF146934.1|	2905	E:0	Populus trichocarpa clone WS01225_C03 unknown mRNA	gi|743918067|ref|XP_011003033.1|	975	E:0	PREDICTED: phospho-2-dehydro-3-deoxyheptonate aldolase 1, chloroplastic-like [Populus euphratica]	AROF_TOBAC	889	E:0	RecName: Full=Phospho-2-dehydro-3-deoxyheptonate aldolase 1, chloroplastic;^Eukaryota; Viridiplantae; Streptophyta; Embryophyta; Tracheophyta; Spermatophyta; Magnoliophyta; eudicotyledons; Gunneridae; Pentapetalae; asterids; lamiids; Solanales; Solanaceae; Nicotianoideae; Nicotianeae; Nicotiana	AROF_TOBAC	889	E:0	RecName: Full=Phospho-2-dehydro-3-deoxyheptonate aldolase 1, chloroplastic;^Eukaryota; Viridiplantae; Streptophyta; Embryophyta; Tracheophyta; Spermatophyta; Magnoliophyta; eudicotyledons; Gunneridae; Pentapetalae; asterids; lamiids; Solanales; Solanaceae; Nicotianoideae; Nicotianeae; Nicotiana	PF01474.15	DAHP_synth_2	Class-II DAHP synthetase family	.	.	.	.	.	GO:0009073|aromatic amino acid family biosynthetic process;GO:0009423|chorismate biosynthetic processGO:0009073|aromatic amino acid family biosynthetic process	GO:0003849|3-deoxy-7-phosphoheptulonate synthase activityGO:0003849|3-deoxy-7-phosphoheptulonate synthase activity	GO:0009507|chloroplast
f2p60_577_35526	1.75388	2.03229e-52	up	yes	1.33658	1.40637e-36	up	yes	0.662547	2.88856e-06	up	no	0.0588461	0.676163	up	no	-0.231132	0.130213	down	no	Gene.16546::PuPacbio_f2p60_577_transcript35526_g9::g.16546::m.16546	3-338[+]	gi|566170015|ref|XM_002307036.2|	937	E:0	Populus trichocarpa hypothetical protein (POPTR_0005s07450g) mRNA, complete cds	gi|743861165|ref|XP_011031057.1|	238	E:7e-73	PREDICTED: phospho-2-dehydro-3-deoxyheptonate aldolase 1, chloroplastic-like [Populus euphratica]	AROF_TOBAC	216	E:3e-65	RecName: Full=Phospho-2-dehydro-3-deoxyheptonate aldolase 1, chloroplastic;^Eukaryota; Viridiplantae; Streptophyta; Embryophyta; Tracheophyta; Spermatophyta; Magnoliophyta; eudicotyledons; Gunneridae; Pentapetalae; asterids; lamiids; Solanales; Solanaceae; Nicotianoideae; Nicotianeae; Nicotiana	AROF_TOBAC	216	E:1e-66	RecName: Full=Phospho-2-dehydro-3-deoxyheptonate aldolase 1, chloroplastic;^Eukaryota; Viridiplantae; Streptophyta; Embryophyta; Tracheophyta; Spermatophyta; Magnoliophyta; eudicotyledons; Gunneridae; Pentapetalae; asterids; lamiids; Solanales; Solanaceae; Nicotianoideae; Nicotianeae; Nicotiana	PF01474.15	DAHP_synth_2	Class-II DAHP synthetase family	.	.	.	.	.	GO:0009073|aromatic amino acid family biosynthetic process;GO:0009423|chorismate biosynthetic processGO:0009073|aromatic amino acid family biosynthetic process	GO:0003849|3-deoxy-7-phosphoheptulonate synthase activityGO:0003849|3-deoxy-7-phosphoheptulonate synthase activity	GO:0009507|chloroplast
f2p60_573_15264	1.68332	9.04656e-31	up	yes	1.13867	7.68475e-14	up	yes	0.571112	0.00113699	up	no	-0.186671	0.329488	down	no	-0.554632	0.00868277	down	no	.	.	gi|566170015|ref|XM_002307036.2|	737	E:0	Populus trichocarpa hypothetical protein (POPTR_0005s07450g) mRNA, complete cds	gi|743861165|ref|XP_011031057.1|	154	E:4e-41	PREDICTED: phospho-2-dehydro-3-deoxyheptonate aldolase 1, chloroplastic-like [Populus euphratica]	AROF_TOBAC	138	E:6e-37	RecName: Full=Phospho-2-dehydro-3-deoxyheptonate aldolase 1, chloroplastic;^Eukaryota; Viridiplantae; Streptophyta; Embryophyta; Tracheophyta; Spermatophyta; Magnoliophyta; eudicotyledons; Gunneridae; Pentapetalae; asterids; lamiids; Solanales; Solanaceae; Nicotianoideae; Nicotianeae; Nicotiana	.	.	.	.	.	.	.	.	.	.	.	.	GO:0009073|aromatic amino acid family biosynthetic process;GO:0009423|chorismate biosynthetic process	GO:0003849|3-deoxy-7-phosphoheptulonate synthase activity	GO:0009507|chloroplast
f2p60_1393_7775	-1.18181	5.18653e-53	down	yes	-0.771241	2.68768e-29	down	no	-0.586626	1.04969e-10	down	no	-0.293935	NA	down	no	-0.597286	1.97425e-11	down	no	Gene.4926::PuPacbio_f2p60_1393_transcript7775_g1::g.4926::m.4926	428-1111[+]	gi|743913084|ref|XM_011002137.1|	2259	E:0	PREDICTED: Populus euphratica two-component response regulator ARR8 (LOC105108010), mRNA	gi|224137712|ref|XP_002322625.1|	344	E:1e-113	hypothetical protein POPTR_0016s03750g [Populus trichocarpa]	ARR8_ARATH	243	E:7e-76	RecName: Full=Two-component response regulator ARR8;^Eukaryota; Viridiplantae; Streptophyta; Embryophyta; Tracheophyta; Spermatophyta; Magnoliophyta; eudicotyledons; Gunneridae; Pentapetalae; rosids; malvids; Brassicales; Brassicaceae; Camelineae; Arabidopsis	ARR9_ARATH	279	E:6e-93	RecName: Full=Two-component response regulator ARR9;^Eukaryota; Viridiplantae; Streptophyta; Embryophyta; Tracheophyta; Spermatophyta; Magnoliophyta; eudicotyledons; Gunneridae; Pentapetalae; rosids; malvids; Brassicales; Brassicaceae; Camelineae; Arabidopsis	PF00072.23	Response_reg	Response regulator receiver domain	COG5641	Transcription factor	.	.	.	GO:0007623|circadian rhythm;GO:0009736|cytokinin-activated signaling pathway;GO:0000160|phosphorelay signal transduction system;GO:0006355|regulation of transcription, DNA-templated;GO:0009735|response to cytokinin;GO:0006351|transcription, DNA-templatedGO:0000160|phosphorelay signal transduction system	GO:0000156|phosphorelay response regulator activity	GO:0005634|nucleus
f2p60_1749_5714	0.547191	2.60393e-19	up	no	-0.321696	2.3511e-07	down	no	-1.52178	7.29259e-68	down	yes	-1.75421	2.55502e-105	down	yes	-1.90387	6.28074e-103	down	yes	Gene.3921::PuPacbio_f2p60_1749_transcript5714_g3::g.3921::m.3921	3-1490[+]	gi|566164338|ref|XM_006383862.1|	2972	E:0	Populus trichocarpa hypothetical protein (POPTR_0004s01270g) mRNA, complete cds	gi|566164339|ref|XP_006383924.1|	877	E:0	hypothetical protein POPTR_0004s01270g [Populus trichocarpa]	ASD_ARATH	544	E:0	RecName: Full=AAA-ATPase ASD, mitochondrial;^Eukaryota; Viridiplantae; Streptophyta; Embryophyta; Tracheophyta; Spermatophyta; Magnoliophyta; eudicotyledons; Gunneridae; Pentapetalae; rosids; malvids; Brassicales; Brassicaceae; Camelineae; Arabidopsis	ASD_ARATH	577	E:0	RecName: Full=AAA-ATPase ASD, mitochondrial;^Eukaryota; Viridiplantae; Streptophyta; Embryophyta; Tracheophyta; Spermatophyta; Magnoliophyta; eudicotyledons; Gunneridae; Pentapetalae; rosids; malvids; Brassicales; Brassicaceae; Camelineae; Arabidopsis	PF14363.5	AAA_assoc	Domain associated at C-terminal with AAA	COG0465	Acts as a processive, ATP-dependent zinc metallopeptidase for both cytoplasmic and membrane proteins. Plays a role in the quality control of integral membrane proteins (By similarity)	.	.	.	GO:0010154|fruit development;GO:0009737|response to abscisic acid;GO:0009409|response to cold;GO:0009651|response to salt stress;GO:0009414|response to water deprivation;GO:0010431|seed maturation	GO:0005524|ATP binding;GO:0016887|ATPase activityGO:0005524|ATP binding	GO:0005783|endoplasmic reticulum;GO:0016021|integral component of membrane;GO:0031966|mitochondrial membrane;GO:0005739|mitochondrion
f9p60_1872_4860	1.01342	5.08105e-07	up	yes	1.18109	2.39963e-11	up	yes	0.210673	0.303694	up	no	-0.446136	0.0622608	down	no	-0.871059	0.000641794	down	no	Gene.3494::PuPacbio_f9p60_1872_transcript4860_g1::g.3494::m.3494	40-1632[+]	gi|566228586|ref|XM_002325739.2|	3217	E:0	Populus trichocarpa hypothetical protein (POPTR_0019s03730g) mRNA, complete cds	gi|566228606|ref|XP_006371099.1|	871	E:0	hypothetical protein POPTR_0019s03740g [Populus trichocarpa]	ASD_ARATH	538	E:0	RecName: Full=AAA-ATPase ASD, mitochondrial;^Eukaryota; Viridiplantae; Streptophyta; Embryophyta; Tracheophyta; Spermatophyta; Magnoliophyta; eudicotyledons; Gunneridae; Pentapetalae; rosids; malvids; Brassicales; Brassicaceae; Camelineae; Arabidopsis	ASD_ARATH	549	E:0	RecName: Full=AAA-ATPase ASD, mitochondrial;^Eukaryota; Viridiplantae; Streptophyta; Embryophyta; Tracheophyta; Spermatophyta; Magnoliophyta; eudicotyledons; Gunneridae; Pentapetalae; rosids; malvids; Brassicales; Brassicaceae; Camelineae; Arabidopsis	PF14363.5	AAA_assoc	Domain associated at C-terminal with AAA	COG0465	Acts as a processive, ATP-dependent zinc metallopeptidase for both cytoplasmic and membrane proteins. Plays a role in the quality control of integral membrane proteins (By similarity)	.	.	.	GO:0010154|fruit development;GO:0009737|response to abscisic acid;GO:0009409|response to cold;GO:0009651|response to salt stress;GO:0009414|response to water deprivation;GO:0010431|seed maturation	GO:0005524|ATP binding;GO:0016887|ATPase activityGO:0005524|ATP binding	GO:0005783|endoplasmic reticulum;GO:0016021|integral component of membrane;GO:0031966|mitochondrial membrane;GO:0005739|mitochondrion
f4p60_1905_22440	-1.2457	4.31603e-95	down	yes	-0.827079	7.67986e-46	down	no	-0.7168	1.33055e-25	down	no	-0.784136	NA	down	no	-0.430951	NA	down	no	Gene.11164::PuPacbio_f4p60_1905_transcript22440_g1::g.11164::m.11164	69-1616[+]	gi|566165674|ref|XM_002305158.2|	3223	E:0	Populus trichocarpa hypothetical protein (POPTR_0004s09040g) mRNA, complete cds	gi|566165675|ref|XP_002305194.2|	926	E:0	hypothetical protein POPTR_0004s09040g [Populus trichocarpa]	ASD_ARATH	603	E:0	RecName: Full=AAA-ATPase ASD, mitochondrial;^Eukaryota; Viridiplantae; Streptophyta; Embryophyta; Tracheophyta; Spermatophyta; Magnoliophyta; eudicotyledons; Gunneridae; Pentapetalae; rosids; malvids; Brassicales; Brassicaceae; Camelineae; Arabidopsis	ASD_ARATH	634	E:0	RecName: Full=AAA-ATPase ASD, mitochondrial;^Eukaryota; Viridiplantae; Streptophyta; Embryophyta; Tracheophyta; Spermatophyta; Magnoliophyta; eudicotyledons; Gunneridae; Pentapetalae; rosids; malvids; Brassicales; Brassicaceae; Camelineae; Arabidopsis	PF14363.5	AAA_assoc	Domain associated at C-terminal with AAA	COG0465	Acts as a processive, ATP-dependent zinc metallopeptidase for both cytoplasmic and membrane proteins. Plays a role in the quality control of integral membrane proteins (By similarity)	.	.	.	GO:0010154|fruit development;GO:0009737|response to abscisic acid;GO:0009409|response to cold;GO:0009651|response to salt stress;GO:0009414|response to water deprivation;GO:0010431|seed maturation	GO:0005524|ATP binding;GO:0016887|ATPase activityGO:0005524|ATP binding	GO:0005783|endoplasmic reticulum;GO:0016021|integral component of membrane;GO:0031966|mitochondrial membrane;GO:0005739|mitochondrion
f3p60_1719_23683	1.0704	9.20447e-36	up	yes	0.811223	7.21508e-26	up	no	0.688603	7.49537e-13	up	no	0.681581	2.96833e-14	up	no	0.609169	1.63432e-12	up	no	Gene.11880::PuPacbio_f3p60_1719_transcript23683_g3::g.11880::m.11880	1-1539[+]	gi|743888600|ref|XM_011040190.1|	2645	E:0	PREDICTED: Populus euphratica probable mitochondrial chaperone BCS1-B (LOC105135347), transcript variant X4, mRNA	gi|743888601|ref|XP_011038492.1|	907	E:0	PREDICTED: probable mitochondrial chaperone BCS1-B isoform X3 [Populus euphratica]	ASD_ARATH	537	E:0	RecName: Full=AAA-ATPase ASD, mitochondrial;^Eukaryota; Viridiplantae; Streptophyta; Embryophyta; Tracheophyta; Spermatophyta; Magnoliophyta; eudicotyledons; Gunneridae; Pentapetalae; rosids; malvids; Brassicales; Brassicaceae; Camelineae; Arabidopsis	ASD_ARATH	542	E:0	RecName: Full=AAA-ATPase ASD, mitochondrial;^Eukaryota; Viridiplantae; Streptophyta; Embryophyta; Tracheophyta; Spermatophyta; Magnoliophyta; eudicotyledons; Gunneridae; Pentapetalae; rosids; malvids; Brassicales; Brassicaceae; Camelineae; Arabidopsis	PF14363.5	AAA_assoc	Domain associated at C-terminal with AAA	COG0465	Acts as a processive, ATP-dependent zinc metallopeptidase for both cytoplasmic and membrane proteins. Plays a role in the quality control of integral membrane proteins (By similarity)	.	ExpAA=19.07^PredHel=1^Topology=i21-39o	.	GO:0010154|fruit development;GO:0009737|response to abscisic acid;GO:0009409|response to cold;GO:0009651|response to salt stress;GO:0009414|response to water deprivation;GO:0010431|seed maturation	GO:0005524|ATP binding;GO:0016887|ATPase activityGO:0005524|ATP binding	GO:0005783|endoplasmic reticulum;GO:0016021|integral component of membrane;GO:0031966|mitochondrial membrane;GO:0005739|mitochondrion
f2p60_1737_23577	-1.04633	7.92737e-16	down	yes	-0.505601	2.02987e-06	down	no	0.00866077	0.934584	up	no	0.0575089	0.602029	up	no	0.0429451	0.697667	up	no	Gene.11807::PuPacbio_f2p60_1737_transcript23577_g7::g.11807::m.11807	124-1650[+]	gi|566172573|ref|XM_002306677.2|	3072	E:0	Populus trichocarpa hypothetical protein (POPTR_0005s21720g) mRNA, complete cds	gi|566172574|ref|XP_002306713.2|	1055	E:0	hypothetical protein POPTR_0005s21720g [Populus trichocarpa]	ASHH1_ARATH	656	E:0	RecName: Full=Histone-lysine N-methyltransferase ASHH1 {ECO:0000305};^Eukaryota; Viridiplantae; Streptophyta; Embryophyta; Tracheophyta; Spermatophyta; Magnoliophyta; eudicotyledons; Gunneridae; Pentapetalae; rosids; malvids; Brassicales; Brassicaceae; Camelineae; Arabidopsis	ASHH1_ARATH	657	E:0	RecName: Full=Histone-lysine N-methyltransferase ASHH1 {ECO:0000305};^Eukaryota; Viridiplantae; Streptophyta; Embryophyta; Tracheophyta; Spermatophyta; Magnoliophyta; eudicotyledons; Gunneridae; Pentapetalae; rosids; malvids; Brassicales; Brassicaceae; Camelineae; Arabidopsis	PF00856.27	SET	SET domain	COG2940	Histone-lysine N-methyltransferase	.	.	.	GO:0006281|DNA repair;GO:0009908|flower development;GO:0016571|histone methylation;GO:0010224|response to UV-B;GO:0010228|vegetative to reproductive phase transition of meristem	GO:0018024|histone-lysine N-methyltransferase activityGO:0005515|protein binding	GO:0000775|chromosome, centromeric region;GO:0005634|nucleus
f2p60_2215_21184	-1.06147	1.22888e-06	down	yes	0.6183	3.56375e-05	up	no	-0.442934	0.0255439	down	no	0.275942	0.0957399	up	no	-0.365891	0.0288328	down	no	Gene.10306::PuPacbio_f2p60_2215_transcript21184_g3::g.10306::m.10306	220-1983[+]	gi|743835097|ref|XM_011026631.1|	3755	E:0	PREDICTED: Populus euphratica asparagine synthetase [glutamine-hydrolyzing] 1 (LOC105125953), transcript variant X1, mRNA	gi|952987712|gb|ALO24232.1|	1185	E:0	asparagine synthetase family protein 3 [Populus simonii x Populus nigra]	ASNS1_ARATH	1019	E:0	RecName: Full=Asparagine synthetase [glutamine-hydrolyzing] 1;^Eukaryota; Viridiplantae; Streptophyta; Embryophyta; Tracheophyta; Spermatophyta; Magnoliophyta; eudicotyledons; Gunneridae; Pentapetalae; rosids; malvids; Brassicales; Brassicaceae; Camelineae; Arabidopsis	ASNS1_ARATH	1048	E:0	RecName: Full=Asparagine synthetase [glutamine-hydrolyzing] 1;^Eukaryota; Viridiplantae; Streptophyta; Embryophyta; Tracheophyta; Spermatophyta; Magnoliophyta; eudicotyledons; Gunneridae; Pentapetalae; rosids; malvids; Brassicales; Brassicaceae; Camelineae; Arabidopsis	PF13522.5	GATase_6	Glutamine amidotransferase domain	COG0367	asparagine synthetase	.	.	.	GO:0006529|asparagine biosynthetic process;GO:0009063|cellular amino acid catabolic process;GO:0043617|cellular response to sucrose starvation;GO:0006541|glutamine metabolic process;GO:0070981|L-asparagine biosynthetic process;GO:0009646|response to absence of light;GO:0009750|response to fructose;GO:0009749|response to glucose;GO:0009744|response to sucroseGO:0006529|asparagine biosynthetic proc…	GO:0004066|asparagine synthase (glutamine-hydrolyzing) activity;GO:0005524|ATP binding;GO:0042803|protein homodimerization activityGO:0004066|asparagine synthase (glutamine-hydrolyzing) activity	.
f2p60_2377_3136	-0.000661477	0.992631	down	no	1.92506	8.49769e-271	up	yes	0.808364	1.40351e-30	up	no	1.48248	NA	up	no	1.32076	4.56975e-17	up	yes	Gene.2478::PuPacbio_f2p60_2377_transcript3136_g1::g.2478::m.2478	242-2011[+]	gi|566186828|ref|XM_002313210.2|	4061	E:0	Populus trichocarpa asparagine synthetase family protein (POPTR_0009s07710g) mRNA, complete cds	gi|952987708|gb|ALO24230.1|	1188	E:0	asparagine synthetase family protein 1 [Populus simonii x Populus nigra]	ASNS1_ARATH	1027	E:0	RecName: Full=Asparagine synthetase [glutamine-hydrolyzing] 1;^Eukaryota; Viridiplantae; Streptophyta; Embryophyta; Tracheophyta; Spermatophyta; Magnoliophyta; eudicotyledons; Gunneridae; Pentapetalae; rosids; malvids; Brassicales; Brassicaceae; Camelineae; Arabidopsis	ASNS1_ARATH	1057	E:0	RecName: Full=Asparagine synthetase [glutamine-hydrolyzing] 1;^Eukaryota; Viridiplantae; Streptophyta; Embryophyta; Tracheophyta; Spermatophyta; Magnoliophyta; eudicotyledons; Gunneridae; Pentapetalae; rosids; malvids; Brassicales; Brassicaceae; Camelineae; Arabidopsis	PF13522.5	GATase_6	Glutamine amidotransferase domain	COG0367	asparagine synthetase	.	.	.	GO:0006529|asparagine biosynthetic process;GO:0009063|cellular amino acid catabolic process;GO:0043617|cellular response to sucrose starvation;GO:0006541|glutamine metabolic process;GO:0070981|L-asparagine biosynthetic process;GO:0009646|response to absence of light;GO:0009750|response to fructose;GO:0009749|response to glucose;GO:0009744|response to sucroseGO:0006529|asparagine biosynthetic proc…	GO:0004066|asparagine synthase (glutamine-hydrolyzing) activity;GO:0005524|ATP binding;GO:0042803|protein homodimerization activityGO:0004066|asparagine synthase (glutamine-hydrolyzing) activity	.
f3p60_476_36812	0.0934335	0.7003	up	no	1.42387	2.8988e-15	up	yes	0.609182	0.00800351	up	no	0.984058	5.0569e-07	up	no	0.868451	4.6941e-06	up	no	.	.	gi|566186828|ref|XM_002313210.2|	778	E:0	Populus trichocarpa asparagine synthetase family protein (POPTR_0009s07710g) mRNA, complete cds	gi|743796058|ref|XP_011003961.1|	103	E:4e-23	PREDICTED: asparagine synthetase [glutamine-hydrolyzing] 1-like [Populus euphratica]	ASNS1_PEA	52.4	E:3e-07	RecName: Full=Asparagine synthetase, nodule [glutamine-hydrolyzing];^Eukaryota; Viridiplantae; Streptophyta; Embryophyta; Tracheophyta; Spermatophyta; Magnoliophyta; eudicotyledons; Gunneridae; Pentapetalae; rosids; fabids; Fabales; Fabaceae; Papilionoideae; Fabeae; Pisum	.	.	.	.	.	.	.	.	.	.	.	.	GO:0006541|glutamine metabolic process;GO:0070981|L-asparagine biosynthetic process	GO:0004066|asparagine synthase (glutamine-hydrolyzing) activity;GO:0005524|ATP binding	.
f3p60_2022_4155	0.876122	2.41684e-08	up	no	1.10687	3.18067e-14	up	yes	0.956788	2.16205e-10	up	no	0.795105	0.000202246	up	no	1.09196	4.51565e-09	up	yes	Gene.3113::PuPacbio_f3p60_2022_transcript4155_g1::g.3113::m.3113	77-1861[+]	gi|566150396|ref|XM_002299746.2|	3587	E:0	Populus trichocarpa ascorbate oxidase precursor family protein (POPTR_0001s22680g) mRNA, complete cds	gi|118488761|gb|ABK96191.1|	1207	E:0	unknown [Populus trichocarpa]	ASO_TOBAC	838	E:0	RecName: Full=L-ascorbate oxidase;^Eukaryota; Viridiplantae; Streptophyta; Embryophyta; Tracheophyta; Spermatophyta; Magnoliophyta; eudicotyledons; Gunneridae; Pentapetalae; asterids; lamiids; Solanales; Solanaceae; Nicotianoideae; Nicotianeae; Nicotiana	ASO_TOBAC	861	E:0	RecName: Full=L-ascorbate oxidase;^Eukaryota; Viridiplantae; Streptophyta; Embryophyta; Tracheophyta; Spermatophyta; Magnoliophyta; eudicotyledons; Gunneridae; Pentapetalae; asterids; lamiids; Solanales; Solanaceae; Nicotianoideae; Nicotianeae; Nicotiana	PF07732.14	Cu-oxidase_3	Multicopper oxidase	.	.	.	.	.	GO:0055114|oxidation-reduction process	GO:0005507|copper ion binding;GO:0008447|L-ascorbate oxidase activityGO:0005507|copper ion binding;GO:0016491|oxidoreductase activity	GO:0005576|extracellular region
f3p60_1916_22461	-0.713905	1.58226e-10	down	no	-1.4977	8.39283e-40	down	yes	-0.890497	6.05854e-13	down	no	-1.31863	4.80539e-25	down	yes	-1.51479	5.4164e-23	down	yes	Gene.11182::PuPacbio_f3p60_1916_transcript22461_g2::g.11182::m.11182	126-1760[+]	gi|566167287|ref|XM_002306177.2|	3354	E:0	Populus trichocarpa hypothetical protein (POPTR_0004s18730g) mRNA, complete cds	gi|743905809|ref|XP_011046313.1|	1085	E:0	PREDICTED: L-ascorbate oxidase homolog [Populus euphratica]	ASOL_BRANA	581	E:0	RecName: Full=L-ascorbate oxidase homolog;^Eukaryota; Viridiplantae; Streptophyta; Embryophyta; Tracheophyta; Spermatophyta; Magnoliophyta; eudicotyledons; Gunneridae; Pentapetalae; rosids; malvids; Brassicales; Brassicaceae; Brassiceae; Brassica	ASOL_BRANA	581	E:0	RecName: Full=L-ascorbate oxidase homolog;^Eukaryota; Viridiplantae; Streptophyta; Embryophyta; Tracheophyta; Spermatophyta; Magnoliophyta; eudicotyledons; Gunneridae; Pentapetalae; rosids; malvids; Brassicales; Brassicaceae; Brassiceae; Brassica	PF07732.14	Cu-oxidase_3	Multicopper oxidase	.	.	.	.	.	GO:0055114|oxidation-reduction process	GO:0005507|copper ion binding;GO:0016491|oxidoreductase activityGO:0005507|copper ion binding;GO:0016491|oxidoreductase activity	GO:0005576|extracellular region
f2p60_1369_26272	1.40453	8.14674e-63	up	yes	0.43434	1.35973e-06	up	no	0.788115	1.54102e-18	up	no	0.351343	0.000622299	up	no	-0.00539456	0.960129	down	no	Gene.13182::PuPacbio_f2p60_1369_transcript26272_g5::g.13182::m.13182	580-1005[+]	gi|566155693|ref|XM_002300633.2|	2377	E:0	Populus trichocarpa multi-copper oxidase type 1 family protein (POPTR_0002s01510g) mRNA, complete cds	gi|224061929|ref|XP_002300669.1|	398	E:0	multi-copper oxidase type 1 family protein [Populus trichocarpa]	ASOL_BRANA	231	E:3e-98	RecName: Full=L-ascorbate oxidase homolog;^Eukaryota; Viridiplantae; Streptophyta; Embryophyta; Tracheophyta; Spermatophyta; Magnoliophyta; eudicotyledons; Gunneridae; Pentapetalae; rosids; malvids; Brassicales; Brassicaceae; Brassiceae; Brassica	ASOL_TOBAC	147	E:6e-41	RecName: Full=L-ascorbate oxidase homolog;^Eukaryota; Viridiplantae; Streptophyta; Embryophyta; Tracheophyta; Spermatophyta; Magnoliophyta; eudicotyledons; Gunneridae; Pentapetalae; asterids; lamiids; Solanales; Solanaceae; Nicotianoideae; Nicotianeae; Nicotiana	PF07731.13	Cu-oxidase_2	Multicopper oxidase	.	.	.	.	.	GO:0055114|oxidation-reduction process	GO:0005507|copper ion binding;GO:0016491|oxidoreductase activityGO:0005507|copper ion binding;GO:0016491|oxidoreductase activity	GO:0005615|extracellular space
f4p60_2033_21893	-0.0929908	0.593869	down	no	-1.18611	1.24071e-10	down	yes	0.49858	0.000861696	up	no	-0.763215	2.14451e-05	down	no	-0.713219	0.000351314	down	no	Gene.10802::PuPacbio_f4p60_2033_transcript21893_g2::g.10802::m.10802	150-1784[+]	gi|118487966|gb|EF147803.1|	3661	E:0	Populus trichocarpa clone WS0125_C06 unknown mRNA	gi|118487967|gb|ABK95805.1|	1067	E:0	unknown [Populus trichocarpa]	ASOL_BRANA	558	E:0	RecName: Full=L-ascorbate oxidase homolog;^Eukaryota; Viridiplantae; Streptophyta; Embryophyta; Tracheophyta; Spermatophyta; Magnoliophyta; eudicotyledons; Gunneridae; Pentapetalae; rosids; malvids; Brassicales; Brassicaceae; Brassiceae; Brassica	ASOL_BRANA	571	E:0	RecName: Full=L-ascorbate oxidase homolog;^Eukaryota; Viridiplantae; Streptophyta; Embryophyta; Tracheophyta; Spermatophyta; Magnoliophyta; eudicotyledons; Gunneridae; Pentapetalae; rosids; malvids; Brassicales; Brassicaceae; Brassiceae; Brassica	PF07732.14	Cu-oxidase_3	Multicopper oxidase	.	.	.	.	.	GO:0055114|oxidation-reduction process	GO:0005507|copper ion binding;GO:0016491|oxidoreductase activityGO:0005507|copper ion binding;GO:0016491|oxidoreductase activity	GO:0005576|extracellular region
f2p60_1901_4708	-0.532784	5.54285e-10	down	no	-1.04358	6.22002e-30	down	yes	-0.913235	6.22276e-22	down	no	-0.774771	3.88617e-08	down	no	-0.749343	1.70163e-08	down	no	Gene.3419::PuPacbio_f2p60_1901_transcript4708_g1::g.3419::m.3419	67-1683[+]	gi|224094447|ref|XM_002310126.1|	3378	E:0	Populus trichocarpa multi-copper oxidase type 1 family protein (POPTR_0007s11600g) mRNA, complete cds	gi|224094448|ref|XP_002310162.1|	1080	E:0	multi-copper oxidase type 1 family protein [Populus trichocarpa]	ASOL_TOBAC	580	E:0	RecName: Full=L-ascorbate oxidase homolog;^Eukaryota; Viridiplantae; Streptophyta; Embryophyta; Tracheophyta; Spermatophyta; Magnoliophyta; eudicotyledons; Gunneridae; Pentapetalae; asterids; lamiids; Solanales; Solanaceae; Nicotianoideae; Nicotianeae; Nicotiana	ASOL_TOBAC	582	E:0	RecName: Full=L-ascorbate oxidase homolog;^Eukaryota; Viridiplantae; Streptophyta; Embryophyta; Tracheophyta; Spermatophyta; Magnoliophyta; eudicotyledons; Gunneridae; Pentapetalae; asterids; lamiids; Solanales; Solanaceae; Nicotianoideae; Nicotianeae; Nicotiana	PF07732.14	Cu-oxidase_3	Multicopper oxidase	.	.	.	.	.	GO:0055114|oxidation-reduction process	GO:0005507|copper ion binding;GO:0016491|oxidoreductase activityGO:0005507|copper ion binding;GO:0016491|oxidoreductase activity	GO:0005615|extracellular space
f3p37_1850_22845	0.18938	0.476934	up	no	1.16264	5.36871e-08	up	yes	-1.02191	0.000347437	down	yes	-0.395568	0.130751	down	no	-0.0667978	0.807844	down	no	Gene.11383::PuPacbio_f3p37_1850_transcript22845_g1::g.11383::m.11383	36-1457[+]	gi|566178010|ref|XM_002309479.2|	3096	E:0	Populus trichocarpa nucleoid DNA-binding family protein (POPTR_0006s24870g) mRNA, complete cds	gi|224092220|ref|XP_002309515.1|	912	E:0	nucleoid DNA-binding family protein [Populus trichocarpa]	ASPA_ARATH	437	E:1e-145	RecName: Full=Aspartyl protease family protein At5g10770;^Eukaryota; Viridiplantae; Streptophyta; Embryophyta; Tracheophyta; Spermatophyta; Magnoliophyta; eudicotyledons; Gunneridae; Pentapetalae; rosids; malvids; Brassicales; Brassicaceae; Camelineae; Arabidopsis	ASPA_ARATH	468	E:1e-159	RecName: Full=Aspartyl protease family protein At5g10770;^Eukaryota; Viridiplantae; Streptophyta; Embryophyta; Tracheophyta; Spermatophyta; Magnoliophyta; eudicotyledons; Gunneridae; Pentapetalae; rosids; malvids; Brassicales; Brassicaceae; Camelineae; Arabidopsis	PF14543.5	TAXi_N	Xylanase inhibitor N-terminal	ENOG410XNV7	aspartic	.	ExpAA=20.63^PredHel=1^Topology=i7-29o	.	GO:0030163|protein catabolic process;GO:0006508|proteolysis	GO:0004190|aspartic-type endopeptidase activity	GO:0031225|anchored component of membrane;GO:0005886|plasma membrane
f2p35_1879_22663	0.209466	0.196023	up	no	0.802972	9.12022e-09	up	no	1.34839	6.28955e-17	up	yes	1.27915	7.60222e-15	up	yes	-0.11597	0.50105	down	no	Gene.11297::PuPacbio_f2p35_1879_transcript22663_g1::g.11297::m.11297	1-516[+]	gi|743882381|ref|XM_011038433.1|	2713	E:0	PREDICTED: Populus euphratica protein ASPARTIC PROTEASE IN GUARD CELL 1-like (LOC105134135), mRNA	gi|224142005|ref|XP_002324351.1|	478	E:0	nucleoid DNA-binding family protein [Populus trichocarpa]	ASPA_ARATH	274	E:9e-89	RecName: Full=Aspartyl protease family protein At5g10770;^Eukaryota; Viridiplantae; Streptophyta; Embryophyta; Tracheophyta; Spermatophyta; Magnoliophyta; eudicotyledons; Gunneridae; Pentapetalae; rosids; malvids; Brassicales; Brassicaceae; Camelineae; Arabidopsis	ASPA_ARATH	76.3	E:4e-15	RecName: Full=Aspartyl protease family protein At5g10770;^Eukaryota; Viridiplantae; Streptophyta; Embryophyta; Tracheophyta; Spermatophyta; Magnoliophyta; eudicotyledons; Gunneridae; Pentapetalae; rosids; malvids; Brassicales; Brassicaceae; Camelineae; Arabidopsis	.	.	.	ENOG410XNV7	aspartic	.	.	.	GO:0030163|protein catabolic process;GO:0006508|proteolysis	GO:0004190|aspartic-type endopeptidase activity	GO:0031225|anchored component of membrane;GO:0005886|plasma membrane
f5p60_1714_5850	-0.13537	0.419683	down	no	-0.0384929	0.810272	down	no	-1.12629	9.48287e-10	down	yes	-1.38288	3.65495e-12	down	yes	-1.81375	6.25735e-19	down	yes	Gene.3998::PuPacbio_f5p60_1714_transcript5850_g1::g.3998::m.3998	58-1482[+]	gi|566178007|ref|XM_002309478.2|	2760	E:0	Populus trichocarpa nucleoid DNA-binding family protein (POPTR_0006s24850g) mRNA, complete cds	gi|224092218|ref|XP_002309514.1|	830	E:0	nucleoid DNA-binding family protein [Populus trichocarpa]	ASPA_ARATH	382	E:5e-125	RecName: Full=Aspartyl protease family protein At5g10770;^Eukaryota; Viridiplantae; Streptophyta; Embryophyta; Tracheophyta; Spermatophyta; Magnoliophyta; eudicotyledons; Gunneridae; Pentapetalae; rosids; malvids; Brassicales; Brassicaceae; Camelineae; Arabidopsis	ASPA_ARATH	443	E:7e-150	RecName: Full=Aspartyl protease family protein At5g10770;^Eukaryota; Viridiplantae; Streptophyta; Embryophyta; Tracheophyta; Spermatophyta; Magnoliophyta; eudicotyledons; Gunneridae; Pentapetalae; rosids; malvids; Brassicales; Brassicaceae; Camelineae; Arabidopsis	PF00026.22	Asp	Eukaryotic aspartyl protease	ENOG410XNV7	aspartic	.	.	.	GO:0030163|protein catabolic process;GO:0006508|proteolysis	GO:0004190|aspartic-type endopeptidase activity	GO:0031225|anchored component of membrane;GO:0005886|plasma membrane
f2p60_1658_24037	1.23886	0.00817504	up	yes	1.84485	7.28477e-06	up	yes	0.498522	0.198845	up	no	0.288857	0.389274	up	no	-0.0901629	0.779871	down	no	Gene.12056::PuPacbio_f2p60_1658_transcript24037_g4::g.12056::m.12056	1-1461[+]	gi|566213944|ref|XM_002324318.2|	2822	E:0	Populus trichocarpa nucleoid DNA-binding family protein (POPTR_0018s03020g) mRNA, complete cds	gi|224142011|ref|XP_002324354.1|	858	E:0	nucleoid DNA-binding family protein [Populus trichocarpa]	ASPA_ARATH	372	E:2e-121	RecName: Full=Aspartyl protease family protein At5g10770;^Eukaryota; Viridiplantae; Streptophyta; Embryophyta; Tracheophyta; Spermatophyta; Magnoliophyta; eudicotyledons; Gunneridae; Pentapetalae; rosids; malvids; Brassicales; Brassicaceae; Camelineae; Arabidopsis	ASPA_ARATH	389	E:9e-129	RecName: Full=Aspartyl protease family protein At5g10770;^Eukaryota; Viridiplantae; Streptophyta; Embryophyta; Tracheophyta; Spermatophyta; Magnoliophyta; eudicotyledons; Gunneridae; Pentapetalae; rosids; malvids; Brassicales; Brassicaceae; Camelineae; Arabidopsis	PF14543.5	TAXi_N	Xylanase inhibitor N-terminal	ENOG410XNV7	aspartic	.	ExpAA=23.07^PredHel=1^Topology=i13-35o	.	GO:0030163|protein catabolic process;GO:0006508|proteolysis	GO:0004190|aspartic-type endopeptidase activity	GO:0031225|anchored component of membrane;GO:0005886|plasma membrane
[truncated: 1,696 more rows]
[truncated: 2 more columns]
