# Supplementary material for: Characterization of the Gene Expression Profile Response to Drought Stress in Populus ussuriensis Using PacBio SMRT and Illumina Sequencing
Source: Int J Mol Sci. 2022 Mar 30;23(7):3840. doi: 10.3390/ijms23073840 (PMC8998571; doi:10.3390/ijms23073840)
Supplement: Supplementary file 1 [file ijms-23-03840-s001.zip › Table S7.xls]

## Sheet: Sheet1
Table S7 DEGs related to drought signals in Populus ussuriensis
geneID	6h Log2FoldChange	pval	Up/Down	Significant	12h Log2FoldChange	pval	Up/Down	Significant	24h Log2FoldChange	pval	Up/Down	Significant	48h Log2FoldChange	pval	Up/Down	Significant	120h Log2FoldChange	pval	Up/Down	Significant	Prot_ID	Prot_Coords	NT_TopHit	NT_Score	NT_Evalue	NT_Description	NR_TopHit	NR_Score	NR_Evalue	NR_Description	BLASTX_Sprot_TopHit	BLASTX_Score	BLASTX_Evalue	BLASTX_Description	BLASTP_Sprot_TopHit	BLASTP_Score	BLASTP_Evalue	BLASTP_Description	PFAM_TopHit	PFAM_Name	PFAM_Description	eggNOG_TopHit	eggNOG_Description	SignalP	TmHMM	RNAMMER	GO_biological_process	GO_molecular_function	GO_cellular_component
f3p49_2228_21048	1.15333	9.20414e-70	up	yes	0.493522	7.65469e-13	up	no	0.522652	8.43163e-13	up	no	0.334942	0.000699049	up	no	0.19291	0.0708649	up	no	Gene.10201::PuPacbio_f3p49_2228_transcript21048_g1::g.10201::m.10201	345-1658[+]	gi|162418031|gb|AC215840.1|	3768	E:0	Populus trichocarpa clone POP043-C12, complete sequence	gi|224142403|ref|XP_002324548.1|	829	E:0	CBL-interacting protein kinase 6 [Populus trichocarpa]	CIPK6_ARATH	638	E:0	RecName: Full=CBL-interacting serine/threonine-protein kinase 6;^Eukaryota; Viridiplantae; Streptophyta; Embryophyta; Tracheophyta; Spermatophyta; Magnoliophyta; eudicotyledons; Gunneridae; Pentapetalae; rosids; malvids; Brassicales; Brassicaceae; Camelineae; Arabidopsis	CIPK6_ARATH	660	E:0	RecName: Full=CBL-interacting serine/threonine-protein kinase 6;^Eukaryota; Viridiplantae; Streptophyta; Embryophyta; Tracheophyta; Spermatophyta; Magnoliophyta; eudicotyledons; Gunneridae; Pentapetalae; rosids; malvids; Brassicales; Brassicaceae; Camelineae; Arabidopsis	PF00069.24	Pkinase	Protein kinase domain	COG0515	Serine Threonine protein kinase	.	.	.	GO:0010540|basipetal auxin transport;GO:0042538|hyperosmotic salinity response;GO:0035556|intracellular signal transduction;GO:0007275|multicellular organism development;GO:0018105|peptidyl-serine phosphorylation;GO:0018107|peptidyl-threonine phosphorylation;GO:0009651|response to salt stress;GO:0009414|response to water deprivationGO:0006468|protein phosphorylation;GO:0007165|signal transduction	GO:0005524|ATP binding;GO:0004674|protein serine/threonine kinase activityGO:0004672|protein kinase activity;GO:0005524|ATP binding	GO:0005783|endoplasmic reticulum;GO:0005622|intracellular
f2p16_511_15749	-0.360815	0.393685	down	no	-1.11903	0.0091919	down	yes	-0.344568	0.32412	down	no	-0.302141	0.338808	down	no	0.0979804	0.752107	up	no	Gene.7528::PuPacbio_f2p16_511_transcript15749_g1::g.7528::m.7528	50-349[-]	gi|566150635|ref|XM_006369416.1|	701	E:0	Populus trichocarpa calcium-binding EF hand family protein (POPTR_0001s23820g) mRNA, complete cds	.	.	.	.	.	.	.	.	.	.	.	.	.	.	.	.	.	.	.	.	.	.	.
f3p60_616_35021	0.341334	0.0585881	up	no	1.28175	1.73253e-19	up	yes	1.18276	8.20284e-16	up	yes	0.87959	7.19779e-10	up	no	1.36355	2.9373e-21	up	yes	Gene.16476::PuPacbio_f3p60_616_transcript35021_g3::g.16476::m.16476	63-365[+]	gi|566157712|ref|XM_002301154.2|	1057	E:0	Populus trichocarpa hypothetical protein (POPTR_0002s12840g) mRNA, complete cds	gi|224063531|ref|XP_002301190.1|	206	E:2e-65	hypothetical protein POPTR_0002s12840g [Populus trichocarpa]	.	.	.	.	CML10_ORYSJ	45.4	E:7e-06	RecName: Full=Probable calcium-binding protein CML10;^Eukaryota; Viridiplantae; Streptophyta; Embryophyta; Tracheophyta; Spermatophyta; Magnoliophyta; Liliopsida; Poales; Poaceae; BOP clade; Oryzoideae; Oryzeae; Oryzinae; Oryza	PF13405.5	EF-hand_6	EF-hand domain	COG5126	Calcium-binding protein	.	.	.	.	GO:0005509|calcium ion bindingGO:0005509|calcium ion binding	.
f2p60_745_332685	-2.06388	6.53101e-14	down	yes	-2.34503	1.76062e-20	down	yes	-2.19989	1.47303e-15	down	yes	-1.46972	2.96956e-09	down	yes	-1.04193	2.26404e-06	down	yes	Gene.16065::PuPacbio_f2p60_745_transcript33268_g15::g.16065::m.16065	201-617[+]	gi|743920421|ref|XM_011005958.1|	1035	E:0	PREDICTED: Populus euphratica calcium-binding protein PBP1-like (LOC105110795), mRNA	gi|743920422|ref|XP_011004260.1|	322	E:4e-109	PREDICTED: calcium-binding protein PBP1-like [Populus euphratica]	PBP1_ARATH	128	E:2e-35	RecName: Full=Calcium-binding protein PBP1;^Eukaryota; Viridiplantae; Streptophyta; Embryophyta; Tracheophyta; Spermatophyta; Magnoliophyta; eudicotyledons; Gunneridae; Pentapetalae; rosids; malvids; Brassicales; Brassicaceae; Camelineae; Arabidopsis	PBP1_ARATH	128	E:9e-37	RecName: Full=Calcium-binding protein PBP1;^Eukaryota; Viridiplantae; Streptophyta; Embryophyta; Tracheophyta; Spermatophyta; Magnoliophyta; eudicotyledons; Gunneridae; Pentapetalae; rosids; malvids; Brassicales; Brassicaceae; Camelineae; Arabidopsis	PF13833.5	EF-hand_8	EF-hand domain pair	COG5126	Calcium-binding protein	.	.	.	GO:0009733|response to auxin	GO:0005509|calcium ion bindingGO:0005509|calcium ion binding	.
f2p60_721_33528	0.659126	4.01597e-05	up	no	0.0753628	0.65032	up	no	-0.267945	0.133736	down	no	-0.782313	0.000246186	down	no	-1.18501	7.22105e-05	down	yes	Gene.16140::PuPacbio_f2p60_721_transcript33528_g4::g.16140::m.16140	62-421[+]	gi|566201369|ref|XM_002319361.2|	1118	E:0	Populus trichocarpa hypothetical protein (POPTR_0013s14730g) mRNA, complete cds	gi|224124692|ref|XP_002319397.1|	232	E:1e-74	hypothetical protein POPTR_0013s14730g [Populus trichocarpa]	PBP1_ARATH	147	E:6e-43	RecName: Full=Calcium-binding protein PBP1;^Eukaryota; Viridiplantae; Streptophyta; Embryophyta; Tracheophyta; Spermatophyta; Magnoliophyta; eudicotyledons; Gunneridae; Pentapetalae; rosids; malvids; Brassicales; Brassicaceae; Camelineae; Arabidopsis	PBP1_ARATH	148	E:8e-45	RecName: Full=Calcium-binding protein PBP1;^Eukaryota; Viridiplantae; Streptophyta; Embryophyta; Tracheophyta; Spermatophyta; Magnoliophyta; eudicotyledons; Gunneridae; Pentapetalae; rosids; malvids; Brassicales; Brassicaceae; Camelineae; Arabidopsis	PF13833.5	EF-hand_8	EF-hand domain pair	COG5126	Calcium-binding protein	.	.	.	GO:0009733|response to auxin	GO:0005509|calcium ion bindingGO:0005509|calcium ion binding	.
f10p60_905_31222	-1.15978	2.55037e-114	down	yes	-0.960268	8.15961e-116	down	no	-0.487452	4.87799e-19	down	no	-0.403886	NA	down	no	-0.173572	0.000451516	down	no	Gene.15324::PuPacbio_f10p60_905_transcript31222_g1::g.15324::m.15324	93-533[+]	gi|566150635|ref|XM_006369416.1|	1530	E:0	Populus trichocarpa calcium-binding EF hand family protein (POPTR_0001s23820g) mRNA, complete cds	gi|566150636|ref|XP_006369478.1|	295	E:3e-98	calcium-binding EF hand family protein [Populus trichocarpa]	sos3	.	.	.	.	.	.	.	PF00036.31	EF-hand_1	EF hand	.	.	.	.	.	.	GO:0005509|calcium ion binding	.
f3p60_2724_19806	-1.16413	7.84636e-85	down	yes	-0.664397	6.2582e-36	down	no	-0.965391	4.35093e-50	down	no	-0.542509	5.84866e-19	down	no	-0.441124	2.0503e-12	down	no	Gene.9381::PuPacbio_f3p60_2724_transcript19806_g2::g.9381::m.9381	244-2160[+]	gi|743928064|ref|XM_011009925.1|	4065	E:0	PREDICTED: Populus euphratica vacuolar-sorting receptor 6-like (LOC105113666), mRNA	gi|566148544|ref|XP_002297915.2|	1222	E:0	hypothetical protein POPTR_0001s12220g [Populus trichocarpa]	VSR6_ARATH	919	E:0	RecName: Full=Vacuolar-sorting receptor 6;^Eukaryota; Viridiplantae; Streptophyta; Embryophyta; Tracheophyta; Spermatophyta; Magnoliophyta; eudicotyledons; Gunneridae; Pentapetalae; rosids; malvids; Brassicales; Brassicaceae; Camelineae; Arabidopsis	VSR6_ARATH	959	E:0	RecName: Full=Vacuolar-sorting receptor 6;^Eukaryota; Viridiplantae; Streptophyta; Embryophyta; Tracheophyta; Spermatophyta; Magnoliophyta; eudicotyledons; Gunneridae; Pentapetalae; rosids; malvids; Brassicales; Brassicaceae; Camelineae; Arabidopsis	PF02225.21	PA	PA domain	ENOG41105IF	calcium ion binding	.	ExpAA=39.80^PredHel=1^Topology=o572-594i	.	GO:0015031|protein transport	GO:0005509|calcium ion bindingGO:0005509|calcium ion binding	GO:0030665|clathrin-coated vesicle membrane;GO:0000139|Golgi membrane;GO:0016021|integral component of membrane;GO:0031902|late endosome membrane
f5p60_1871_5077	-1.55651	2.24167e-60	down	yes	-0.622646	4.68176e-19	down	no	-0.522343	9.07248e-13	down	no	-0.732295	1.01287e-19	down	no	-0.646906	1.05523e-15	down	no	Gene.3597::PuPacbio_f5p60_1871_transcript5077_g1::g.3597::m.3597	183-1619[+]	gi|566158706|ref|XM_002302648.2|	3338	E:0	Populus trichocarpa hypothetical protein (POPTR_0002s18330g) mRNA, complete cds	gi|566158707|ref|XP_002302684.2|	985	E:0	hypothetical protein POPTR_0002s18330g [Populus trichocarpa]	YC22_ARATH	599	E:0	RecName: Full=Uncharacterized calcium-binding protein At1g02270;^Eukaryota; Viridiplantae; Streptophyta; Embryophyta; Tracheophyta; Spermatophyta; Magnoliophyta; eudicotyledons; Gunneridae; Pentapetalae; rosids; malvids; Brassicales; Brassicaceae; Camelineae; Arabidopsis	YC22_ARATH	602	E:0	RecName: Full=Uncharacterized calcium-binding protein At1g02270;^Eukaryota; Viridiplantae; Streptophyta; Embryophyta; Tracheophyta; Spermatophyta; Magnoliophyta; eudicotyledons; Gunneridae; Pentapetalae; rosids; malvids; Brassicales; Brassicaceae; Camelineae; Arabidopsis	PF03372.22	Exo_endo_phos	Endonuclease/Exonuclease/phosphatase family	COG5239	Ccr4-NOT transcription complex, subunit	.	.	.	GO:0009409|response to cold	GO:0005509|calcium ion bindingGO:0005509|calcium ion binding	GO:0016021|integral component of membrane;GO:0005634|nucleus
f2p60_1346_26477	-0.670251	0.000184597	down	no	-2.33771	6.68679e-32	down	yes	-1.6726	2.29184e-20	down	yes	-0.353558	0.0440543	down	no	-0.703863	4.2862e-06	down	no	Gene.13288::PuPacbio_f2p60_1346_transcript26477_g7::g.13288::m.13288	41-871[+]	gi|566227856|ref|XM_002325735.2|	2348	E:0	Populus trichocarpa phosphoenolpyruvate-carboxylase kinase family protein (POPTR_0019s03480g) mRNA, complete cds	gi|566227857|ref|XP_002325771.2|	572	E:0	phosphoenolpyruvate-carboxylase kinase family protein [Populus trichocarpa]	PPCK2_ARATH	382	E:4e-129	RecName: Full=Phosphoenolpyruvate carboxylase kinase 2;^Eukaryota; Viridiplantae; Streptophyta; Embryophyta; Tracheophyta; Spermatophyta; Magnoliophyta; eudicotyledons; Gunneridae; Pentapetalae; rosids; malvids; Brassicales; Brassicaceae; Camelineae; Arabidopsis	PPCK2_ARATH	381	E:8e-132	RecName: Full=Phosphoenolpyruvate carboxylase kinase 2;^Eukaryota; Viridiplantae; Streptophyta; Embryophyta; Tracheophyta; Spermatophyta; Magnoliophyta; eudicotyledons; Gunneridae; Pentapetalae; rosids; malvids; Brassicales; Brassicaceae; Camelineae; Arabidopsis	PF00069.24	Pkinase	Protein kinase domain	ENOG410XRMJ	calcium-dependent protein kinase	.	.	.	GO:0016036|cellular response to phosphate starvation;GO:0035556|intracellular signal transduction;GO:0018105|peptidyl-serine phosphorylation;GO:0046777|protein autophosphorylation;GO:0006468|protein phosphorylation;GO:0046898|response to cycloheximide;GO:0009416|response to light stimulusGO:0006468|protein phosphorylation	GO:0005524|ATP binding;GO:0009931|calcium-dependent protein serine/threonine kinase activity;GO:0005516|calmodulin binding;GO:0004683|calmodulin-dependent protein kinase activity;GO:0004674|protein serine/threonine kinase activityGO:0004672|protein kinase activity;GO:0005524|ATP binding	GO:0005737|cytoplasm;GO:0005634|nucleus
f2p60_482_36687	0.599416	0.238101	up	no	2.42293	5.15041e-11	up	yes	0.900391	0.0164197	up	no	1.72305	4.02552e-08	up	yes	1.39002	1.29053e-05	up	yes	.	.	gi|118488363|gb|EF148005.1|	678	E:0	Populus trichocarpa clone WS0126_J20 unknown mRNA	gi|566202159|ref|XP_006374954.1|	154	E:9e-46	hypothetical protein POPTR_0014s03060g [Populus trichocarpa]	.	.	.	.	.	.	.	.	.	.	.	.	.	.	.	.	.	.	.
f3p60_2488_2863	-1.29503	3.08166e-20	down	yes	-0.704028	3.88268e-08	down	no	-0.646377	1.29901e-07	down	no	-0.429223	0.00122016	down	no	-0.358903	0.00239943	down	no	Gene.2335::PuPacbio_f3p60_2488_transcript2863_g1::g.2335::m.2335	397-1920[+]	gi|566206584|ref|XM_002321532.2|	4246	E:0	Populus trichocarpa hypothetical protein (POPTR_0015s08320g) mRNA, complete cds	gi|566206585|ref|XP_002321568.2|	998	E:0	hypothetical protein POPTR_0015s08320g [Populus trichocarpa]	CB60A_ARATH	482	E:8e-160	RecName: Full=Calmodulin-binding protein 60 A {ECO:0000303|PubMed:11782485};^Eukaryota; Viridiplantae; Streptophyta; Embryophyta; Tracheophyta; Spermatophyta; Magnoliophyta; eudicotyledons; Gunneridae; Pentapetalae; rosids; malvids; Brassicales; Brassicaceae; Camelineae; Arabidopsis	CB60A_ARATH	481	E:3e-164	RecName: Full=Calmodulin-binding protein 60 A {ECO:0000303|PubMed:11782485};^Eukaryota; Viridiplantae; Streptophyta; Embryophyta; Tracheophyta; Spermatophyta; Magnoliophyta; eudicotyledons; Gunneridae; Pentapetalae; rosids; malvids; Brassicales; Brassicaceae; Camelineae; Arabidopsis	PF07887.10	Calmodulin_bind	Calmodulin binding protein-like	ENOG410YG1A	calmodulin-binding protein	.	.	.	GO:1902478|negative regulation of defense response to bacterium, incompatible interaction;GO:0006355|regulation of transcription, DNA-templated;GO:0006950|response to stress;GO:0006351|transcription, DNA-templatedGO:0006950|response to stress	GO:0005516|calmodulin binding;GO:0003677|DNA bindingGO:0005516|calmodulin binding	GO:0005634|nucleus
f2p60_444_16225	-1.94656	6.03585e-16	down	yes	-1.16693	9.90412e-09	down	yes	-1.46758	9.68802e-12	down	yes	-1.29417	7.10278e-08	down	yes	-1.03667	3.20848e-07	down	yes	Gene.7552::PuPacbio_f2p60_444_transcript16225_g2::g.7552::m.7552	1-315[+]	gi|566203446|ref|XM_002320176.2|	760	E:0	Populus trichocarpa calcium-binding family protein (POPTR_0014s09720g) mRNA, complete cds	gi|224127983|ref|XP_002320212.1|	208	E:2e-66	calcium-binding family protein [Populus trichocarpa]	KIC_ARATH	169	E:1e-52	RecName: Full=Calcium-binding protein KIC;^Eukaryota; Viridiplantae; Streptophyta; Embryophyta; Tracheophyta; Spermatophyta; Magnoliophyta; eudicotyledons; Gunneridae; Pentapetalae; rosids; malvids; Brassicales; Brassicaceae; Camelineae; Arabidopsis	KIC_ARATH	169	E:2e-53	RecName: Full=Calcium-binding protein KIC;^Eukaryota; Viridiplantae; Streptophyta; Embryophyta; Tracheophyta; Spermatophyta; Magnoliophyta; eudicotyledons; Gunneridae; Pentapetalae; rosids; malvids; Brassicales; Brassicaceae; Camelineae; Arabidopsis	PF13833.5	EF-hand_8	EF-hand domain pair	COG5126	Calcium-binding protein	.	.	.	GO:0010091|trichome branching	GO:0005509|calcium ion bindingGO:0005509|calcium ion binding	.
f2p30_1011_11035	1.10806	1.30123e-09	up	yes	1.60918	1.1344e-23	up	yes	1.10517	9.1497e-11	up	yes	1.17017	9.64246e-09	up	yes	0.1836	0.522426	up	no	Gene.6276::PuPacbio_f2p30_1011_transcript11035_g1::g.6276::m.6276	328-921[+]	gi|566173672|ref|XM_002307796.2|	1775	E:0	Populus trichocarpa hypothetical protein (POPTR_0005s28110g) mRNA, complete cds	gi|224086146|ref|XP_002307832.1|	365	E:3e-124	hypothetical protein POPTR_0005s28110g [Populus trichocarpa]	CML38_ARATH	156	E:2e-44	RecName: Full=Calcium-binding protein CML38;^Eukaryota; Viridiplantae; Streptophyta; Embryophyta; Tracheophyta; Spermatophyta; Magnoliophyta; eudicotyledons; Gunneridae; Pentapetalae; rosids; malvids; Brassicales; Brassicaceae; Camelineae; Arabidopsis	CML38_ARATH	159	E:4e-47	RecName: Full=Calcium-binding protein CML38;^Eukaryota; Viridiplantae; Streptophyta; Embryophyta; Tracheophyta; Spermatophyta; Magnoliophyta; eudicotyledons; Gunneridae; Pentapetalae; rosids; malvids; Brassicales; Brassicaceae; Camelineae; Arabidopsis	PF13833.5	EF-hand_8	EF-hand domain pair	COG5126	Calcium-binding protein	.	.	.	GO:0009611|response to wounding	GO:0005509|calcium ion bindingGO:0005509|calcium ion binding	GO:0005886|plasma membrane
f2p60_1046_10683	1.13352	2.92122e-21	up	yes	1.08712	1.74909e-21	up	yes	0.35901	0.00585351	up	no	0.0759223	NA	up	no	-0.882168	5.01456e-08	down	no	Gene.6143::PuPacbio_f2p60_1046_transcript10683_g1::g.6143::m.6143	111-791[+]	gi|566175688|ref|XM_006381215.1|	1709	E:0	Populus trichocarpa calcium-binding family protein (POPTR_0006s11320g) mRNA, complete cds	gi|566175689|ref|XP_006381277.1|	367	E:5e-125	calcium-binding family protein [Populus trichocarpa]	CML42_ARATH	231	E:3e-73	RecName: Full=Calcium-binding protein CML42;^Eukaryota; Viridiplantae; Streptophyta; Embryophyta; Tracheophyta; Spermatophyta; Magnoliophyta; eudicotyledons; Gunneridae; Pentapetalae; rosids; malvids; Brassicales; Brassicaceae; Camelineae; Arabidopsis	CML42_ARATH	239	E:6e-78	RecName: Full=Calcium-binding protein CML42;^Eukaryota; Viridiplantae; Streptophyta; Embryophyta; Tracheophyta; Spermatophyta; Magnoliophyta; eudicotyledons; Gunneridae; Pentapetalae; rosids; malvids; Brassicales; Brassicaceae; Camelineae; Arabidopsis	PF13405.5	EF-hand_6	EF-hand domain	COG5126	Calcium-binding protein	.	.	.	GO:0010091|trichome branching	GO:0005509|calcium ion bindingGO:0005509|calcium ion binding	.
f2p60_490_36587	0.480722	0.0290754	up	no	1.59358	5.68134e-22	up	yes	0.982438	1.0538e-07	up	no	1.27233	8.08234e-10	up	yes	1.84321	6.86312e-32	up	yes	.	.	gi|566182898|ref|XM_006379587.1|	800	E:0	Populus trichocarpa hypothetical protein (POPTR_0008s07850g) mRNA, complete cds	gi|566182899|ref|XP_006379649.1|	193	E:6e-61	hypothetical protein POPTR_0008s07850g [Populus trichocarpa]	CML5_ARATH	47.8	E:8e-06	RecName: Full=Calmodulin-like protein 5;^Eukaryota; Viridiplantae; Streptophyta; Embryophyta; Tracheophyta; Spermatophyta; Magnoliophyta; eudicotyledons; Gunneridae; Pentapetalae; rosids; malvids; Brassicales; Brassicaceae; Camelineae; Arabidopsis	.	.	.	.	.	.	.	COG5126	Calcium-binding protein	.	.	.	.	GO:0005509|calcium ion binding	GO:0012505|endomembrane system;GO:0031303|integral component of endosome membrane
f2p37_2396_20662	0.37571	0.10625	up	no	1.28828	2.83432e-13	up	yes	0.852838	5.61767e-06	up	no	1.14583	1.57083e-08	up	yes	1.38871	2.27688e-15	up	yes	Gene.9942::PuPacbio_f2p37_2396_transcript20662_g1::g.9942::m.9942	2-2206[+]	gi|566212951|ref|XM_006373283.1|	4322	E:0	Populus trichocarpa hypothetical protein (POPTR_0017s12550g) mRNA, complete cds	gi|566212952|ref|XP_006373345.1|	1334	E:0	hypothetical protein POPTR_0017s12550g [Populus trichocarpa]	CNGC2_ARATH	999	E:0	RecName: Full=Cyclic nucleotide-gated ion channel 2;^Eukaryota; Viridiplantae; Streptophyta; Embryophyta; Tracheophyta; Spermatophyta; Magnoliophyta; eudicotyledons; Gunneridae; Pentapetalae; rosids; malvids; Brassicales; Brassicaceae; Camelineae; Arabidopsis	CNGC2_ARATH	1077	E:0	RecName: Full=Cyclic nucleotide-gated ion channel 2;^Eukaryota; Viridiplantae; Streptophyta; Embryophyta; Tracheophyta; Spermatophyta; Magnoliophyta; eudicotyledons; Gunneridae; Pentapetalae; rosids; malvids; Brassicales; Brassicaceae; Camelineae; Arabidopsis	PF00520.30	Ion_trans	Ion transport protein	ENOG410XPSE	Potassium voltage-gated channel, subfamily H (Eag-related), member	.	ExpAA=139.53^PredHel=4^Topology=o269-291i298-320o402-424i445-467o	.	GO:0070509|calcium ion import;GO:0006952|defense response;GO:0007263|nitric oxide mediated signal transduction;GO:0009626|plant-type hypersensitive response;GO:0042391|regulation of membrane potentialGO:0006811|ion transport;GO:0055085|transmembrane transport	GO:0005262|calcium channel activity;GO:0005516|calmodulin binding;GO:0030552|cAMP binding;GO:0030553|cGMP binding;GO:0005222|intracellular cAMP activated cation channel activity;GO:0005221|intracellular cyclic nucleotide activated cation channel activity;GO:0005242|inward rectifier potassium channel activityGO:0005216|ion channel activity	GO:0005887|integral component of plasma membrane;GO:0005622|intracellularGO:0016020|membrane
f2p60_1034_10879	-1.23565	1.46741e-32	down	yes	-1.2213	3.44302e-43	down	yes	-0.595446	4.15695e-12	down	no	-0.408666	NA	down	no	-0.52911	0.000164081	down	no	Gene.6225::PuPacbio_f2p60_1034_transcript10879_g5::g.6225::m.6225	446-781[-]	gi|743920477|ref|XM_011005986.1|	1589	E:0	PREDICTED: Populus euphratica plasma membrane-associated cation-binding protein 1-like (LOC105110821), transcript variant X1, mRNA	gi|224057896|ref|XP_002299378.1|	209	E:4e-63	DREPP plasma membrane polypeptide family protein [Populus trichocarpa]	PCAP1_ARATH	142	E:2e-38	RecName: Full=Plasma membrane-associated cation-binding protein 1;^Eukaryota; Viridiplantae; Streptophyta; Embryophyta; Tracheophyta; Spermatophyta; Magnoliophyta; eudicotyledons; Gunneridae; Pentapetalae; rosids; malvids; Brassicales; Brassicaceae; Camelineae; Arabidopsis	.	.	.	.	.	.	.	.	.	.	ExpAA=37.87^PredHel=1^Topology=i12-34o	.	.	.	.
f2p60_1106_28893	-1.17806	5.94032e-36	down	yes	-1.17323	3.65015e-41	down	yes	-0.568583	1.23033e-09	down	no	-0.265881	NA	down	no	-0.379757	0.0186678	down	no	Gene.14359::PuPacbio_f2p60_1106_transcript28893_g5::g.14359::m.14359	449-784[-]	gi|743920477|ref|XM_011005986.1|	1629	E:0	PREDICTED: Populus euphratica plasma membrane-associated cation-binding protein 1-like (LOC105110821), transcript variant X1, mRNA	gi|224057896|ref|XP_002299378.1|	211	E:8e-64	DREPP plasma membrane polypeptide family protein [Populus trichocarpa]	PCAP1_ARATH	144	E:7e-39	RecName: Full=Plasma membrane-associated cation-binding protein 1;^Eukaryota; Viridiplantae; Streptophyta; Embryophyta; Tracheophyta; Spermatophyta; Magnoliophyta; eudicotyledons; Gunneridae; Pentapetalae; rosids; malvids; Brassicales; Brassicaceae; Camelineae; Arabidopsis	.	.	.	.	.	.	.	.	.	.	ExpAA=37.87^PredHel=1^Topology=i12-34o	.	.	.	.
f2p60_1080_10564	-1.33934	1.53309e-97	down	yes	-1.24531	2.87146e-103	down	yes	-0.685161	1.72683e-27	down	no	-0.297784	0.000471629	down	no	-0.458553	4.07311e-06	down	no	Gene.6109::PuPacbio_f2p60_1080_transcript10564_g3::g.6109::m.6109	169-780[+]	gi|566162851|ref|XM_006385797.1|	1820	E:0	Populus trichocarpa DREPP plasma membrane polypeptide family protein (POPTR_0003s15580g) mRNA, complete cds	gi|566162852|ref|XP_006385859.1|	216	E:1e-65	DREPP plasma membrane polypeptide family protein [Populus trichocarpa]	PCAP1_ARATH	146	E:6e-40	RecName: Full=Plasma membrane-associated cation-binding protein 1;^Eukaryota; Viridiplantae; Streptophyta; Embryophyta; Tracheophyta; Spermatophyta; Magnoliophyta; eudicotyledons; Gunneridae; Pentapetalae; rosids; malvids; Brassicales; Brassicaceae; Camelineae; Arabidopsis	PCAP1_ARATH	190	E:9e-59	RecName: Full=Plasma membrane-associated cation-binding protein 1;^Eukaryota; Viridiplantae; Streptophyta; Embryophyta; Tracheophyta; Spermatophyta; Magnoliophyta; eudicotyledons; Gunneridae; Pentapetalae; rosids; malvids; Brassicales; Brassicaceae; Camelineae; Arabidopsis	PF05558.11	DREPP	DREPP plasma membrane polypeptide	ENOG410YIYH	salt stress root protein	.	.	.	GO:0071280|cellular response to copper ion;GO:0071281|cellular response to iron ion;GO:0071286|cellular response to magnesium ion;GO:0010350|cellular response to magnesium starvation;GO:0071325|cellular response to mannitol stimulus;GO:0071219|cellular response to molecule of bacterial origin;GO:0035865|cellular response to potassium ion;GO:0071472|cellular response to salt stress;GO:0072709|cell…	GO:0005509|calcium ion binding;GO:0005516|calmodulin binding;GO:0005507|copper ion binding;GO:0008017|microtubule binding;GO:0005547|phosphatidylinositol-3,4,5-trisphosphate binding;GO:0043325|phosphatidylinositol-3,4-bisphosphate binding;GO:0080025|phosphatidylinositol-3,5-bisphosphate binding;GO:0005546|phosphatidylinositol-4,5-bisphosphate binding	GO:0046658|anchored component of plasma membrane;GO:0009507|chloroplast;GO:0005881|cytoplasmic microtubule;GO:0005886|plasma membrane;GO:0009506|plasmodesma;GO:0005773|vacuoleGO:0046658|anchored component of plasma membrane
f2p60_2293_3245	1.54446	2.88609e-211	up	yes	0.598944	4.99445e-33	up	no	0.0616346	0.334838	up	no	-0.178721	0.00337193	down	no	-0.221897	0.00134285	down	no	Gene.2553::PuPacbio_f2p60_2293_transcript3245_g1::g.2553::m.2553	223-1176[+]	gi|743912704|ref|XM_011001939.1|	3537	E:0	PREDICTED: Populus euphratica uncharacterized LOC105107868 (LOC105107868), mRNA	gi|566153478|ref|XP_002298903.2|	506	E:0	sodium/calcium exchanger family protein [Populus trichocarpa]	NCL_ARATH	309	E:6e-175	RecName: Full=Sodium/calcium exchanger NCL {ECO:0000305};^Eukaryota; Viridiplantae; Streptophyta; Embryophyta; Tracheophyta; Spermatophyta; Magnoliophyta; eudicotyledons; Gunneridae; Pentapetalae; rosids; malvids; Brassicales; Brassicaceae; Camelineae; Arabidopsis	NCL_ARATH	375	E:2e-124	RecName: Full=Sodium/calcium exchanger NCL {ECO:0000305};^Eukaryota; Viridiplantae; Streptophyta; Embryophyta; Tracheophyta; Spermatophyta; Magnoliophyta; eudicotyledons; Gunneridae; Pentapetalae; rosids; malvids; Brassicales; Brassicaceae; Camelineae; Arabidopsis	PF01699.23	Na_Ca_ex	Sodium/calcium exchanger protein	ENOG410ZVKW	Calcium-binding EF hand family protein	.	ExpAA=132.22^PredHel=6^Topology=i12-29o83-105i118-140o155-177i214-233o243-265i	.	GO:0055074|calcium ion homeostasis;GO:0071472|cellular response to salt stressGO:0055085|transmembrane transport	GO:0005509|calcium ion binding;GO:0005432|calcium:sodium antiporter activity	GO:0016021|integral component of membrane;GO:0016020|membrane;GO:0000325|plant-type vacuole;GO:0005886|plasma membrane;GO:0009506|plasmodesma;GO:0005774|vacuolar membrane;GO:0005773|vacuoleGO:0016021|integral component of membrane
f2p21_2499_2742	2.01365	3.22348e-10	up	yes	5.50019	5.20431e-171	up	yes	0.745127	0.0235201	up	no	0.570725	0.0708055	up	no	0.7702	0.00983543	up	no	Gene.2253::PuPacbio_f2p21_2499_transcript2742_g1::g.2253::m.2253	169-1947[+]	gi|566194929|ref|XM_002316835.2|	4224	E:0	Populus trichocarpa hypothetical protein (POPTR_0011s11370g) mRNA, complete cds	gi|224114842|ref|XP_002316871.1|	1143	E:0	hypothetical protein POPTR_0011s11370g [Populus trichocarpa]	NCED1_PHAVU	886	E:0	RecName: Full=9-cis-epoxycarotenoid dioxygenase NCED1, chloroplastic;^Eukaryota; Viridiplantae; Streptophyta; Embryophyta; Tracheophyta; Spermatophyta; Magnoliophyta; eudicotyledons; Gunneridae; Pentapetalae; rosids; fabids; Fabales; Fabaceae; Papilionoideae; Phaseoleae; Phaseolus	NCED1_PHAVU	893	E:0	RecName: Full=9-cis-epoxycarotenoid dioxygenase NCED1, chloroplastic;^Eukaryota; Viridiplantae; Streptophyta; Embryophyta; Tracheophyta; Spermatophyta; Magnoliophyta; eudicotyledons; Gunneridae; Pentapetalae; rosids; fabids; Fabales; Fabaceae; Papilionoideae; Phaseoleae; Phaseolus	PF03055.14	RPE65	Retinal pigment epithelial membrane protein	.	.	.	.	.	GO:0009688|abscisic acid biosynthetic processGO:0055114|oxidation-reduction process	GO:0045549|9-cis-epoxycarotenoid dioxygenase activity;GO:0046872|metal ion bindingGO:0016702|oxidoreductase activity, acting on single donors with incorporation of molecular oxygen, incorporation of two atoms of oxygen	GO:0009535|chloroplast thylakoid membrane
f7p60_2153_21415	-0.275882	0.107073	down	no	1.41253	2.0667e-30	up	yes	0.844803	5.94709e-09	up	no	1.77529	7.00074e-43	up	yes	1.74873	1.27615e-15	up	yes	Gene.10471::PuPacbio_f7p60_2153_transcript21415_g1::g.10471::m.10471	30-1868[+]	gi|566242107|ref|XM_002326001.2|	3814	E:0	Populus trichocarpa hypothetical protein (POPTR_0019s12320g) mRNA, complete cds	gi|566242108|ref|XP_002326037.2|	1139	E:0	hypothetical protein POPTR_0019s12320g [Populus trichocarpa]	CCD4_ARATH	804	E:0	RecName: Full=Probable carotenoid cleavage dioxygenase 4, chloroplastic;^Eukaryota; Viridiplantae; Streptophyta; Embryophyta; Tracheophyta; Spermatophyta; Magnoliophyta; eudicotyledons; Gunneridae; Pentapetalae; rosids; malvids; Brassicales; Brassicaceae; Camelineae; Arabidopsis	CCD4_ARATH	841	E:0	RecName: Full=Probable carotenoid cleavage dioxygenase 4, chloroplastic;^Eukaryota; Viridiplantae; Streptophyta; Embryophyta; Tracheophyta; Spermatophyta; Magnoliophyta; eudicotyledons; Gunneridae; Pentapetalae; rosids; malvids; Brassicales; Brassicaceae; Camelineae; Arabidopsis	PF03055.14	RPE65	Retinal pigment epithelial membrane protein	COG3670	dioxygenase	.	.	.	GO:0055114|oxidation-reduction process	GO:0046872|metal ion binding;GO:0016702|oxidoreductase activity, acting on single donors with incorporation of molecular oxygen, incorporation of two atoms of oxygenGO:0016702|oxidoreductase activity, acting on single donors with incorporation of molecular oxygen, incorporation of two atoms of oxygen	GO:0009507|chloroplast;GO:0010287|plastoglobule
f2p60_1117_287682	-1.27246	7.80874e-38	down	yes	-1.18205	7.35777e-35	down	yes	-1.51553	1.01358e-42	down	yes	-1.51662	1.34507e-49	down	yes	-1.37243	3.51562e-43	down	yes	.	.	gi|566175552|ref|XM_002308200.2|	1703	E:0	Populus trichocarpa hypothetical protein (POPTR_0006s10500g) mRNA, complete cds	gi|566175553|ref|XP_002308236.2|	384	E:6e-131	hypothetical protein POPTR_0006s10500g [Populus trichocarpa]	PYL4_ARATH	251	E:2e-80	RecName: Full=Abscisic acid receptor PYL4;^Eukaryota; Viridiplantae; Streptophyta; Embryophyta; Tracheophyta; Spermatophyta; Magnoliophyta; eudicotyledons; Gunneridae; Pentapetalae; rosids; malvids; Brassicales; Brassicaceae; Camelineae; Arabidopsis	.	.	.	.	.	.	.	ENOG4111MYF	abscisic acid receptor	.	.	.	GO:0009738|abscisic acid-activated signaling pathway	GO:0010427|abscisic acid binding;GO:0042803|protein homodimerization activity;GO:0004864|protein phosphatase inhibitor activity;GO:0004872|receptor activity	GO:0005737|cytoplasm;GO:0005634|nucleus;GO:0005886|plasma membrane
f2p49_1112_10090	-0.879233	2.27287e-12	down	no	-1.09006	1.62841e-18	down	yes	-1.5	6.67961e-23	down	yes	-1.48441	4.90902e-13	down	yes	-1.33283	2.90744e-11	down	yes	.	.	gi|566175552|ref|XM_002308200.2|	1746	E:0	Populus trichocarpa hypothetical protein (POPTR_0006s10500g) mRNA, complete cds	gi|566175553|ref|XP_002308236.2|	385	E:3e-131	hypothetical protein POPTR_0006s10500g [Populus trichocarpa]	PYL4_ARATH	251	E:3e-80	RecName: Full=Abscisic acid receptor PYL4;^Eukaryota; Viridiplantae; Streptophyta; Embryophyta; Tracheophyta; Spermatophyta; Magnoliophyta; eudicotyledons; Gunneridae; Pentapetalae; rosids; malvids; Brassicales; Brassicaceae; Camelineae; Arabidopsis	.	.	.	.	.	.	.	ENOG4111MYF	abscisic acid receptor	.	.	.	GO:0009738|abscisic acid-activated signaling pathway	GO:0010427|abscisic acid binding;GO:0042803|protein homodimerization activity;GO:0004864|protein phosphatase inhibitor activity;GO:0004872|receptor activity	GO:0005737|cytoplasm;GO:0005634|nucleus;GO:0005886|plasma membrane
f2p60_1246_27481	-1.87155	4.59732e-211	down	yes	-1.51372	5.4984e-169	down	yes	-2.292	4.10947e-242	down	yes	-2.17744	NA	down	no	-3.69551	0	down	yes	.	.	gi|566182805|ref|XM_002312147.2|	1194	E:0	Populus trichocarpa hypothetical protein (POPTR_0008s07340g) mRNA, complete cds	gi|566182806|ref|XP_002312183.2|	390	E:3e-132	hypothetical protein POPTR_0008s07340g [Populus trichocarpa]	PYL4_ARATH	231	E:5e-72	RecName: Full=Abscisic acid receptor PYL4;^Eukaryota; Viridiplantae; Streptophyta; Embryophyta; Tracheophyta; Spermatophyta; Magnoliophyta; eudicotyledons; Gunneridae; Pentapetalae; rosids; malvids; Brassicales; Brassicaceae; Camelineae; Arabidopsis	.	.	.	.	.	.	.	ENOG4111MYF	abscisic acid receptor	.	.	.	GO:0009738|abscisic acid-activated signaling pathway	GO:0010427|abscisic acid binding;GO:0042803|protein homodimerization activity;GO:0004864|protein phosphatase inhibitor activity;GO:0004872|receptor activity	GO:0005737|cytoplasm;GO:0005634|nucleus;GO:0005886|plasma membrane
f2p60_1249_27389	-1.23373	1.61464e-77	down	yes	-0.456864	9.69228e-12	down	no	-1.01364	3.91587e-42	down	yes	-1.06115	2.40856e-14	down	yes	-1.64614	7.52748e-107	down	yes	Gene.13728::PuPacbio_f2p60_1249_transcript27389_g5::g.13728::m.13728	181-825[+]	gi|566191605|ref|XM_002315100.2|	2109	E:0	Populus trichocarpa hypothetical protein (POPTR_0010s19120g) mRNA, complete cds	gi|566191606|ref|XP_002315136.2|	409	E:5e-140	hypothetical protein POPTR_0010s19120g [Populus trichocarpa]	PYL6_ARATH	248	E:2e-78	RecName: Full=Abscisic acid receptor PYL6;^Eukaryota; Viridiplantae; Streptophyta; Embryophyta; Tracheophyta; Spermatophyta; Magnoliophyta; eudicotyledons; Gunneridae; Pentapetalae; rosids; malvids; Brassicales; Brassicaceae; Camelineae; Arabidopsis	PYL6_ARATH	248	E:2e-81	RecName: Full=Abscisic acid receptor PYL6;^Eukaryota; Viridiplantae; Streptophyta; Embryophyta; Tracheophyta; Spermatophyta; Magnoliophyta; eudicotyledons; Gunneridae; Pentapetalae; rosids; malvids; Brassicales; Brassicaceae; Camelineae; Arabidopsis	PF10604.8	Polyketide_cyc2	Polyketide cyclase / dehydrase and lipid transport	ENOG4111MYF	abscisic acid receptor	.	.	.	GO:0009738|abscisic acid-activated signaling pathwayGO:0006952|defense response;GO:0009607|response to biotic stimulus	GO:0010427|abscisic acid binding;GO:0042803|protein homodimerization activity;GO:0004864|protein phosphatase inhibitor activity;GO:0004872|receptor activity	GO:0005737|cytoplasm;GO:0005634|nucleus;GO:0005886|plasma membrane
f2p60_653_34458	-1.14463	0.0060639	down	yes	-1.67663	7.23544e-05	down	yes	-1.21947	0.000529658	down	yes	-1.31749	5.60429e-05	down	yes	-1.03892	0.00122724	down	yes	.	.	gi|566168459|ref|XM_006385093.1|	918	E:0	Populus trichocarpa cytochrome P450 family protein (POPTR_0004s24360g) mRNA, complete cds	.	.	.	.	.	.	.	.	.	.	.	.	.	.	.	.	.	.	.	.	.	.	.
f4p60_2036_4219	-0.838665	6.97874e-10	down	no	-1.46483	1.62125e-33	down	yes	-0.900516	3.2496e-14	down	no	-1.50446	1.13935e-19	down	yes	-1.25219	3.65896e-24	down	yes	Gene.3145::PuPacbio_f4p60_2036_transcript4219_g1::g.3145::m.3145	59-1474[+]	gi|566168459|ref|XM_006385093.1|	3542	E:0	Populus trichocarpa cytochrome P450 family protein (POPTR_0004s24360g) mRNA, complete cds	gi|743849533|ref|XP_011028493.1|	923	E:0	PREDICTED: abscisic acid 8'-hydroxylase 1 [Populus euphratica]	ABAH1_ARATH	777	E:0	RecName: Full=Abscisic acid 8'-hydroxylase 1;^Eukaryota; Viridiplantae; Streptophyta; Embryophyta; Tracheophyta; Spermatophyta; Magnoliophyta; eudicotyledons; Gunneridae; Pentapetalae; rosids; malvids; Brassicales; Brassicaceae; Camelineae; Arabidopsis	ABAH1_ARATH	784	E:0	RecName: Full=Abscisic acid 8'-hydroxylase 1;^Eukaryota; Viridiplantae; Streptophyta; Embryophyta; Tracheophyta; Spermatophyta; Magnoliophyta; eudicotyledons; Gunneridae; Pentapetalae; rosids; malvids; Brassicales; Brassicaceae; Camelineae; Arabidopsis	PF00067.21	p450	Cytochrome P450	.	.	.	ExpAA=19.34^PredHel=1^Topology=i7-24o	.	GO:0046345|abscisic acid catabolic process;GO:0016132|brassinosteroid biosynthetic process;GO:0010268|brassinosteroid homeostasis;GO:0016125|sterol metabolic processGO:0055114|oxidation-reduction process	GO:0010295|(+)-abscisic acid 8'-hydroxylase activity;GO:0020037|heme binding;GO:0005506|iron ion bindingGO:0005506|iron ion binding;GO:0016705|oxidoreductase activity, acting on paired donors, with incorporation or reduction of molecular oxygen;GO:0020037|heme binding	GO:0016021|integral component of membrane
f2p60_2264_21035	1.22082	1.53635e-07	up	yes	1.0058	8.78405e-06	up	yes	0.375541	0.124546	up	no	-0.059609	0.819922	down	no	-0.186796	0.532927	down	no	Gene.10191::PuPacbio_f2p60_2264_transcript21035_g1::g.10191::m.10191	20-2005[+]	gi|743904890|ref|XM_011047528.1|	3567	E:0	PREDICTED: Populus euphratica probable serine/threonine-protein kinase At1g18390 (LOC105140631), transcript variant X2, mRNA	gi|743904891|ref|XP_011045830.1|	1234	E:0	PREDICTED: probable serine/threonine-protein kinase At1g18390 isoform X2 [Populus euphratica]	LRL12_ARATH	498	E:7e-165	RecName: Full=LEAF RUST 10 DISEASE-RESISTANCE LOCUS RECEPTOR-LIKE PROTEIN KINASE-like 1.2 {ECO:0000303|PubMed:12805585};^Eukaryota; Viridiplantae; Streptophyta; Embryophyta; Tracheophyta; Spermatophyta; Magnoliophyta; eudicotyledons; Gunneridae; Pentapetalae; rosids; malvids; Brassicales; Brassicaceae; Camelineae; Arabidopsis	LRL12_ARATH	510	E:9e-171	RecName: Full=LEAF RUST 10 DISEASE-RESISTANCE LOCUS RECEPTOR-LIKE PROTEIN KINASE-like 1.2 {ECO:0000303|PubMed:12805585};^Eukaryota; Viridiplantae; Streptophyta; Embryophyta; Tracheophyta; Spermatophyta; Magnoliophyta; eudicotyledons; Gunneridae; Pentapetalae; rosids; malvids; Brassicales; Brassicaceae; Camelineae; Arabidopsis	PF14380.5	WAK_assoc	Wall-associated receptor kinase C-terminal	COG0515	Serine Threonine protein kinase	.	ExpAA=41.19^PredHel=2^Topology=o10-29i279-301o	.	GO:0007166|cell surface receptor signaling pathway;GO:0071215|cellular response to abscisic acid stimulus;GO:0042631|cellular response to water deprivation;GO:0048573|photoperiodism, floweringGO:0006468|protein phosphorylation	GO:0005524|ATP binding;GO:0030247|polysaccharide binding;GO:0004674|protein serine/threonine kinase activityGO:0004672|protein kinase activity;GO:0005524|ATP binding	GO:0016021|integral component of membrane;GO:0005886|plasma membrane
f2p60_1754_23479	2.04973	3.3829e-19	up	yes	3.18957	2.66221e-66	up	yes	1.80215	2.67725e-16	up	yes	1.89921	4.65602e-19	up	yes	1.74636	9.88102e-15	up	yes	Gene.11756::PuPacbio_f2p60_1754_transcript23479_g6::g.11756::m.11756	153-1481[+]	gi|743865663|ref|XM_011033940.1|	2586	E:0	PREDICTED: Populus euphratica probable protein phosphatase 2C 24 (LOC105131125), mRNA	gi|743865664|ref|XP_011032242.1|	704	E:0	PREDICTED: probable protein phosphatase 2C 24 [Populus euphratica]	P2C03_ARATH	399	E:9e-132	RecName: Full=Protein phosphatase 2C 3;^Eukaryota; Viridiplantae; Streptophyta; Embryophyta; Tracheophyta; Spermatophyta; Magnoliophyta; eudicotyledons; Gunneridae; Pentapetalae; rosids; malvids; Brassicales; Brassicaceae; Camelineae; Arabidopsis	P2C03_ARATH	451	E:6e-154	RecName: Full=Protein phosphatase 2C 3;^Eukaryota; Viridiplantae; Streptophyta; Embryophyta; Tracheophyta; Spermatophyta; Magnoliophyta; eudicotyledons; Gunneridae; Pentapetalae; rosids; malvids; Brassicales; Brassicaceae; Camelineae; Arabidopsis	PF00481.20	PP2C	Protein phosphatase 2C	COG0631	Phosphatase	.	.	.	GO:0009788|negative regulation of abscisic acid-activated signaling pathway;GO:1902039|negative regulation of seed dormancy process;GO:0009939|positive regulation of gibberellic acid mediated signaling pathway;GO:0010030|positive regulation of seed germination;GO:0048838|release of seed from dormancy	GO:0046872|metal ion binding;GO:0005267|potassium channel activity;GO:0004722|protein serine/threonine phosphatase activityGO:0003824|catalytic activity	GO:0005886|plasma membrane
f2p32_1786_23271	0.5826	0.000327881	up	no	1.12077	1.3341e-15	up	yes	0.700186	7.94924e-05	up	no	0.888254	5.7895e-07	up	no	1.05227	7.85449e-10	up	yes	Gene.11648::PuPacbio_f2p32_1786_transcript23271_g1::g.11648::m.11648	172-1497[+]	gi|743876649|ref|XM_011036952.1|	2591	E:0	PREDICTED: Populus euphratica probable protein phosphatase 2C 24 (LOC105133117), transcript variant X2, mRNA	gi|743876650|ref|XP_011035254.1|	773	E:0	PREDICTED: probable protein phosphatase 2C 24 [Populus euphratica]	P2C24_ARATH	414	E:1e-138	RecName: Full=Probable protein phosphatase 2C 24;^Eukaryota; Viridiplantae; Streptophyta; Embryophyta; Tracheophyta; Spermatophyta; Magnoliophyta; eudicotyledons; Gunneridae; Pentapetalae; rosids; malvids; Brassicales; Brassicaceae; Camelineae; Arabidopsis	P2C24_ARATH	436	E:2e-149	RecName: Full=Probable protein phosphatase 2C 24;^Eukaryota; Viridiplantae; Streptophyta; Embryophyta; Tracheophyta; Spermatophyta; Magnoliophyta; eudicotyledons; Gunneridae; Pentapetalae; rosids; malvids; Brassicales; Brassicaceae; Camelineae; Arabidopsis	PF00481.20	PP2C	Protein phosphatase 2C	COG0631	Phosphatase	.	.	.	.	GO:0046872|metal ion binding;GO:0004722|protein serine/threonine phosphatase activityGO:0003824|catalytic activity	.
f4p60_1400_7729	-0.790544	9.03052e-29	down	no	-1.05309	2.33967e-41	down	yes	-0.196761	0.00520145	down	no	0.0424659	0.574554	up	no	0.287778	0.00055013	up	no	Gene.4903::PuPacbio_f4p60_1400_transcript7729_g1::g.4903::m.4903	1-876[+]	gi|566208848|ref|XM_002322671.2|	2420	E:0	Populus trichocarpa hypothetical protein (POPTR_0016s05470g) mRNA, complete cds	gi|566208849|ref|XP_002322707.2|	435	E:2e-148	hypothetical protein POPTR_0016s05470g [Populus trichocarpa]	REM41_ORYSJ	197	E:6e-57	RecName: Full=Remorin 4.1 {ECO:0000305};^Eukaryota; Viridiplantae; Streptophyta; Embryophyta; Tracheophyta; Spermatophyta; Magnoliophyta; Liliopsida; Poales; Poaceae; BOP clade; Oryzoideae; Oryzeae; Oryzinae; Oryza	REM41_ORYSJ	241	E:5e-76	RecName: Full=Remorin 4.1 {ECO:0000305};^Eukaryota; Viridiplantae; Streptophyta; Embryophyta; Tracheophyta; Spermatophyta; Magnoliophyta; Liliopsida; Poales; Poaceae; BOP clade; Oryzoideae; Oryzeae; Oryzinae; Oryza	PF03763.12	Remorin_C	Remorin, C-terminal region	ENOG410YBQG	Remorin, C-terminal region	.	.	.	GO:0009738|abscisic acid-activated signaling pathway;GO:1900458|negative regulation of brassinosteroid mediated signaling pathway	.	GO:0005886|plasma membrane
f2p14_2283_3319	-1.44988	3.94969e-26	down	yes	-1.24969	1.98642e-22	down	yes	-0.22039	0.106528	down	no	-1.1497	1.16577e-18	down	yes	-0.596804	1.00864e-06	down	no	Gene.2598::PuPacbio_f2p14_2283_transcript3319_g1::g.2598::m.2598	3-1919[+]	gi|743809921|ref|XM_011020317.1|	3760	E:0	PREDICTED: Populus euphratica type I inositol 1,4,5-trisphosphate 5-phosphatase 2-like (LOC105121602), transcript variant X3, mRNA	gi|743809900|ref|XP_011018617.1|	1220	E:0	PREDICTED: type I inositol 1,4,5-trisphosphate 5-phosphatase 2-like [Populus euphratica]	IP5P2_ARATH	612	E:0	RecName: Full=Type I inositol polyphosphate 5-phosphatase 2 {ECO:0000303|PubMed:11402208};^Eukaryota; Viridiplantae; Streptophyta; Embryophyta; Tracheophyta; Spermatophyta; Magnoliophyta; eudicotyledons; Gunneridae; Pentapetalae; rosids; malvids; Brassicales; Brassicaceae; Camelineae; Arabidopsis	IP5P2_ARATH	664	E:0	RecName: Full=Type I inositol polyphosphate 5-phosphatase 2 {ECO:0000303|PubMed:11402208};^Eukaryota; Viridiplantae; Streptophyta; Embryophyta; Tracheophyta; Spermatophyta; Magnoliophyta; eudicotyledons; Gunneridae; Pentapetalae; rosids; malvids; Brassicales; Brassicaceae; Camelineae; Arabidopsis	PF03372.22	Exo_endo_phos	Endonuclease/Exonuclease/phosphatase family	COG5411	inositol	.	.	.	GO:0009738|abscisic acid-activated signaling pathway;GO:0046855|inositol phosphate dephosphorylation;GO:0032957|inositol trisphosphate metabolic process;GO:0046856|phosphatidylinositol dephosphorylation;GO:0009737|response to abscisic acid;GO:0009845|seed germination;GO:0090351|seedling development	GO:0052659|inositol-1,3,4,5-tetrakisphosphate 5-phosphatase activity;GO:0052658|inositol-1,4,5-trisphosphate 5-phosphatase activity;GO:0004445|inositol-polyphosphate 5-phosphatase activity;GO:0034485|phosphatidylinositol-3,4,5-trisphosphate 5-phosphatase activity;GO:0004439|phosphatidylinositol-4,5-bisphosphate 5-phosphatase activity	.
f7p60_892_12070	0.214237	0.455956	up	no	1.31095	8.2562e-09	up	yes	0.842867	0.00059322	up	no	1.27052	1.19183e-07	up	yes	1.24632	NA	up	no	Gene.6645::PuPacbio_f7p60_892_transcript12070_g1::g.6645::m.6645	2-721[+]	gi|566188238|ref|XM_002313587.2|	1526	E:0	Populus trichocarpa forkhead-associated domain-containing family protein (POPTR_0009s15870g) mRNA, complete cds	gi|566188239|ref|XP_002313623.2|	415	E:3e-144	forkhead-associated domain-containing family protein [Populus trichocarpa]	ABA2_SOLLC	51.2	E:6e-06	RecName: Full=Zeaxanthin epoxidase, chloroplastic;^Eukaryota; Viridiplantae; Streptophyta; Embryophyta; Tracheophyta; Spermatophyta; Magnoliophyta; eudicotyledons; Gunneridae; Pentapetalae; asterids; lamiids; Solanales; Solanaceae; Solanoideae; Solaneae; Solanum; Lycopersicon	ABA2_NICPL	57	E:4e-08	RecName: Full=Zeaxanthin epoxidase, chloroplastic;^Eukaryota; Viridiplantae; Streptophyta; Embryophyta; Tracheophyta; Spermatophyta; Magnoliophyta; eudicotyledons; Gunneridae; Pentapetalae; asterids; lamiids; Solanales; Solanaceae; Nicotianoideae; Nicotianeae; Nicotiana	PF16697.4	Yop-YscD_cpl	Inner membrane component of T3SS, cytoplasmic domain	.	.	.	.	.	GO:0009688|abscisic acid biosynthetic process	GO:0071949|FAD binding;GO:0009540|zeaxanthin epoxidase [overall] activityGO:0005515|protein binding	GO:0031969|chloroplast membrane;GO:0009535|chloroplast thylakoid membrane
f2p60_1454_7358	1.24543	5.29665e-06	up	yes	0.969824	0.000315558	up	no	1.39023	1.42297e-08	up	yes	0.585625	0.0369838	up	no	0.144831	0.636457	up	no	Gene.4731::PuPacbio_f2p60_1454_transcript7358_g2::g.4731::m.4731	1-1251[+]	gi|156119659|gb|AC208490.1|	2543	E:0	Populus trichocarpa clone JGIACSB261-L10, complete sequence	gi|566146986|ref|XP_006368487.1|	762	E:0	hypothetical protein POPTR_0001s03390g [Populus trichocarpa]	M3K17_ARATH	176	E:2e-48	RecName: Full=Mitogen-activated protein kinase kinase kinase 17 {ECO:0000303|PubMed:25720833};^Eukaryota; Viridiplantae; Streptophyta; Embryophyta; Tracheophyta; Spermatophyta; Magnoliophyta; eudicotyledons; Gunneridae; Pentapetalae; rosids; malvids; Brassicales; Brassicaceae; Camelineae; Arabidopsis	M3K17_ARATH	179	E:2e-50	RecName: Full=Mitogen-activated protein kinase kinase kinase 17 {ECO:0000303|PubMed:25720833};^Eukaryota; Viridiplantae; Streptophyta; Embryophyta; Tracheophyta; Spermatophyta; Magnoliophyta; eudicotyledons; Gunneridae; Pentapetalae; rosids; malvids; Brassicales; Brassicaceae; Camelineae; Arabidopsis	PF00069.24	Pkinase	Protein kinase domain	ENOG410XQGS	mitogen-activated protein kinase kinase kinase	.	.	.	GO:0009738|abscisic acid-activated signaling pathway;GO:0032147|activation of protein kinase activity;GO:0007346|regulation of mitotic cell cycle;GO:0009737|response to abscisic acid;GO:0006970|response to osmotic stress;GO:0023014|signal transduction by protein phosphorylation;GO:0031098|stress-activated protein kinase signaling cascadeGO:0006468|protein phosphorylation	GO:0005524|ATP binding;GO:0004709|MAP kinase kinase kinase activity;GO:0004674|protein serine/threonine kinase activity;GO:0004702|signal transducer, downstream of receptor, with serine/threonine kinase activityGO:0004672|protein kinase activity;GO:0005524|ATP binding	GO:0005737|cytoplasm
f3p60_1424_25791	1.27653	1.20807e-09	up	yes	0.271937	0.251778	up	no	1.38361	1.01121e-12	up	yes	0.5502	0.0642172	up	no	-0.576985	0.0237786	down	no	Gene.12975::PuPacbio_f3p60_1424_transcript25791_g2::g.12975::m.12975	51-1109[+]	gi|160333969|gb|AC214414.1|	2444	E:0	Populus trichocarpa clone POP023-G05, complete sequence	gi|566180679|ref|XP_002310721.2|	715	E:0	hypothetical protein POPTR_0007s10930g [Populus trichocarpa]	M3K17_ARATH	203	E:1e-58	RecName: Full=Mitogen-activated protein kinase kinase kinase 17 {ECO:0000303|PubMed:25720833};^Eukaryota; Viridiplantae; Streptophyta; Embryophyta; Tracheophyta; Spermatophyta; Magnoliophyta; eudicotyledons; Gunneridae; Pentapetalae; rosids; malvids; Brassicales; Brassicaceae; Camelineae; Arabidopsis	M3K17_ARATH	203	E:5e-60	RecName: Full=Mitogen-activated protein kinase kinase kinase 17 {ECO:0000303|PubMed:25720833};^Eukaryota; Viridiplantae; Streptophyta; Embryophyta; Tracheophyta; Spermatophyta; Magnoliophyta; eudicotyledons; Gunneridae; Pentapetalae; rosids; malvids; Brassicales; Brassicaceae; Camelineae; Arabidopsis	PF00069.24	Pkinase	Protein kinase domain	ENOG410XQGS	mitogen-activated protein kinase kinase kinase	.	.	.	GO:0009738|abscisic acid-activated signaling pathway;GO:0032147|activation of protein kinase activity;GO:0007346|regulation of mitotic cell cycle;GO:0009737|response to abscisic acid;GO:0006970|response to osmotic stress;GO:0023014|signal transduction by protein phosphorylation;GO:0031098|stress-activated protein kinase signaling cascadeGO:0006468|protein phosphorylation	GO:0005524|ATP binding;GO:0004709|MAP kinase kinase kinase activity;GO:0004674|protein serine/threonine kinase activity;GO:0004702|signal transducer, downstream of receptor, with serine/threonine kinase activityGO:0004672|protein kinase activity;GO:0005524|ATP binding	GO:0005737|cytoplasm
f4p60_1325_8326	0.806264	0.104078	up	no	1.00689	0.0312029	up	no	2.58242	1.56429e-15	up	yes	1.09887	0.00103764	up	yes	-0.0662428	0.838911	down	no	Gene.5146::PuPacbio_f4p60_1325_transcript8326_g2::g.5146::m.5146	66-1109[+]	gi|566171992|ref|XM_002306437.2|	1781	E:0	Populus trichocarpa hypothetical protein (POPTR_0005s18240g) mRNA, complete cds	gi|566171993|ref|XP_002306473.2|	641	E:0	hypothetical protein POPTR_0005s18240g [Populus trichocarpa]	M3K18_ARATH	174	E:3e-48	RecName: Full=Mitogen-activated protein kinase kinase kinase 18 {ECO:0000303|PubMed:26443375};^Eukaryota; Viridiplantae; Streptophyta; Embryophyta; Tracheophyta; Spermatophyta; Magnoliophyta; eudicotyledons; Gunneridae; Pentapetalae; rosids; malvids; Brassicales; Brassicaceae; Camelineae; Arabidopsis	M3K17_ARATH	196	E:3e-57	RecName: Full=Mitogen-activated protein kinase kinase kinase 17 {ECO:0000303|PubMed:25720833};^Eukaryota; Viridiplantae; Streptophyta; Embryophyta; Tracheophyta; Spermatophyta; Magnoliophyta; eudicotyledons; Gunneridae; Pentapetalae; rosids; malvids; Brassicales; Brassicaceae; Camelineae; Arabidopsis	PF00069.24	Pkinase	Protein kinase domain	ENOG410XQGS	mitogen-activated protein kinase kinase kinase	.	.	.	GO:0009738|abscisic acid-activated signaling pathway;GO:0032147|activation of protein kinase activity;GO:0007346|regulation of mitotic cell cycle;GO:0009737|response to abscisic acid;GO:0006970|response to osmotic stress;GO:0023014|signal transduction by protein phosphorylation;GO:0031098|stress-activated protein kinase signaling cascadeGO:0006468|protein phosphorylation	GO:0005524|ATP binding;GO:0004709|MAP kinase kinase kinase activity;GO:0004674|protein serine/threonine kinase activity;GO:0004702|signal transducer, downstream of receptor, with serine/threonine kinase activityGO:0004672|protein kinase activity;GO:0005524|ATP binding	GO:0005737|cytoplasm
f5p60_1300_26955	1.39818	1.37281e-21	up	yes	1.12925	9.7955e-15	up	yes	0.345109	0.0405619	up	no	0.266205	0.201336	up	no	-0.587248	0.00574459	down	no	Gene.13517::PuPacbio_f5p60_1300_transcript26955_g2::g.13517::m.13517	1-1125[+]	gi|566204417|ref|XM_002321097.2|	2261	E:0	Populus trichocarpa kinase family protein (POPTR_0014s15310g) mRNA, complete cds	gi|566204418|ref|XP_002321133.2|	667	E:0	kinase family protein [Populus trichocarpa]	M3K18_ARATH	325	E:2e-106	RecName: Full=Mitogen-activated protein kinase kinase kinase 18 {ECO:0000303|PubMed:26443375};^Eukaryota; Viridiplantae; Streptophyta; Embryophyta; Tracheophyta; Spermatophyta; Magnoliophyta; eudicotyledons; Gunneridae; Pentapetalae; rosids; malvids; Brassicales; Brassicaceae; Camelineae; Arabidopsis	M3K18_ARATH	336	E:1e-111	RecName: Full=Mitogen-activated protein kinase kinase kinase 18 {ECO:0000303|PubMed:26443375};^Eukaryota; Viridiplantae; Streptophyta; Embryophyta; Tracheophyta; Spermatophyta; Magnoliophyta; eudicotyledons; Gunneridae; Pentapetalae; rosids; malvids; Brassicales; Brassicaceae; Camelineae; Arabidopsis	PF00069.24	Pkinase	Protein kinase domain	ENOG410XQGS	mitogen-activated protein kinase kinase kinase	.	.	.	GO:0009738|abscisic acid-activated signaling pathway;GO:0032147|activation of protein kinase activity;GO:1902457|negative regulation of stomatal opening;GO:0009789|positive regulation of abscisic acid-activated signaling pathway;GO:1900057|positive regulation of leaf senescence;GO:0046777|protein autophosphorylation;GO:0007346|regulation of mitotic cell cycle;GO:2000038|regulation of stomatal com…	GO:0005524|ATP binding;GO:0004709|MAP kinase kinase kinase activity;GO:0004672|protein kinase activity;GO:0004674|protein serine/threonine kinase activity;GO:0004702|signal transducer, downstream of receptor, with serine/threonine kinase activityGO:0004672|protein kinase activity;GO:0005524|ATP binding	GO:0005737|cytoplasm;GO:0005634|nucleus
[truncated: 2 more columns]
