# Supplementary material for: Characterization of the Gene Expression Profile Response to Drought Stress in Populus ussuriensis Using PacBio SMRT and Illumina Sequencing
Source: Int J Mol Sci. 2022 Mar 30;23(7):3840. doi: 10.3390/ijms23073840 (PMC8998571; doi:10.3390/ijms23073840)
Supplement: Supplementary file 1 [file ijms-23-03840-s001.zip › Table S8.xls]

## Sheet: Sheet1
Table S8 DEGs related to ROS in Populus ussuriensis
geneID	6h Log2FoldChange	pval	Up/Down	Significant	12h Log2FoldChange	pval	Up/Down	Significant	24h Log2FoldChange	pval	Up/Down	Significant	48h Log2FoldChange	pval	Up/Down	Significant	120h Log2FoldChange	pval	Up/Down	Significant	Prot_ID	Prot_Coords	NT_TopHit	NT_Score	NT_Evalue	NT_Description	NR_TopHit	NR_Score	NR_Evalue	NR_Description	BLASTX_Sprot_TopHit	BLASTX_Score	BLASTX_Evalue	BLASTX_Description	BLASTP_Sprot_TopHit	BLASTP_Score	BLASTP_Evalue	BLASTP_Description	PFAM_TopHit	PFAM_Name	PFAM_Description	eggNOG_TopHit	eggNOG_Description	SignalP	TmHMM	RNAMMER	GO_biological_process	GO_molecular_function	GO_cellular_component
f2p60_1251_9106	-1.12396	4.61163e-68	down	yes	-0.67266	1.46911e-35	down	no	-0.325343	1.48912e-07	down	no	-0.123318	0.100927	down	no	-0.0542362	0.465877	down	no	Gene.5491::PuPacbio_f2p60_1251_transcript9106_g4::g.5491::m.5491	155-904[+]	gi|566176140|ref|XM_006381438.1|	1921	E:0	Populus trichocarpa ascorbate peroxidase family protein (POPTR_0006s13440g) mRNA, complete cds	gi|566176141|ref|XP_006381500.1|	503	E:2e-176	ascorbate peroxidase family protein [Populus trichocarpa]	APX2_ARATH	440	E:4e-153	RecName: Full=L-ascorbate peroxidase 2, cytosolic;^Eukaryota; Viridiplantae; Streptophyta; Embryophyta; Tracheophyta; Spermatophyta; Magnoliophyta; eudicotyledons; Gunneridae; Pentapetalae; rosids; malvids; Brassicales; Brassicaceae; Camelineae; Arabidopsis	APX2_ARATH	441	E:6e-156	RecName: Full=L-ascorbate peroxidase 2, cytosolic;^Eukaryota; Viridiplantae; Streptophyta; Embryophyta; Tracheophyta; Spermatophyta; Magnoliophyta; eudicotyledons; Gunneridae; Pentapetalae; rosids; malvids; Brassicales; Brassicaceae; Camelineae; Arabidopsis	PF00141.22	peroxidase	Peroxidase	COG0376	Bifunctional enzyme with both catalase and broad- spectrum peroxidase activity (By similarity)	.	.	.	GO:0034599|cellular response to oxidative stress;GO:0042744|hydrogen peroxide catabolic process;GO:0006979|response to oxidative stress;GO:0000302|response to reactive oxygen speciesGO:0006979|response to oxidative stress;GO:0055114|oxidation-reduction process	GO:0004130|cytochrome-c peroxidase activity;GO:0020037|heme binding;GO:0016688|L-ascorbate peroxidase activity;GO:0046872|metal ion bindingGO:0004601|peroxidase activity;GO:0020037|heme binding	GO:0009507|chloroplast;GO:0005829|cytosol
f2p60_1375_7966	-0.213957	0.225224	down	no	0.535408	0.000721344	up	no	0.423607	0.00436706	up	no	0.667746	1.22651e-06	up	no	1.17252	3.47795e-11	up	yes	Gene.5004::PuPacbio_f2p60_1375_transcript7966_g2::g.5004::m.5004	1-1056[+]	gi|743930633|ref|XM_011011270.1|	2326	E:0	PREDICTED: Populus euphratica thylakoid lumenal 29 kDa protein, chloroplastic (LOC105114652), transcript variant X1, mRNA	gi|743930634|ref|XP_011009572.1|	655	E:0	PREDICTED: thylakoid lumenal 29 kDa protein, chloroplastic isoform X1 [Populus euphratica]	TL29_SOLLC	491	E:6e-171	RecName: Full=Thylakoid lumenal 29 kDa protein, chloroplastic;^Eukaryota; Viridiplantae; Streptophyta; Embryophyta; Tracheophyta; Spermatophyta; Magnoliophyta; eudicotyledons; Gunneridae; Pentapetalae; asterids; lamiids; Solanales; Solanaceae; Solanoideae; Solaneae; Solanum; Lycopersicon	TL29_SOLLC	504	E:8e-178	RecName: Full=Thylakoid lumenal 29 kDa protein, chloroplastic;^Eukaryota; Viridiplantae; Streptophyta; Embryophyta; Tracheophyta; Spermatophyta; Magnoliophyta; eudicotyledons; Gunneridae; Pentapetalae; asterids; lamiids; Solanales; Solanaceae; Solanoideae; Solaneae; Solanum; Lycopersicon	PF00141.22	peroxidase	Peroxidase	ENOG410XSAA	Thylakoid lumenal 29 kDa protein	.	.	.	GO:0034599|cellular response to oxidative stress;GO:0042744|hydrogen peroxide catabolic process;GO:0000302|response to reactive oxygen speciesGO:0006979|response to oxidative stress;GO:0055114|oxidation-reduction process	GO:0004130|cytochrome-c peroxidase activity;GO:0020037|heme bindingGO:0004601|peroxidase activity;GO:0020037|heme binding	GO:0009543|chloroplast thylakoid lumen
f12p60_1963_4769	-1.04879	4.46361e-131	down	yes	-0.544445	4.8098e-41	down	no	-0.236555	7.21979e-05	down	no	-0.026669	0.553292	down	no	0.139127	0.00761344	up	no	Gene.3448::PuPacbio_f12p60_1963_transcript4769_g1::g.3448::m.3448	150-1628[+]	gi|224065684|ref|XM_002301884.1|	3317	E:0	Populus trichocarpa catalase family protein (POPTR_0002s01080g) mRNA, complete cds	gi|224065685|ref|XP_002301920.1|	1029	E:0	catalase family protein [Populus trichocarpa]	CATA1_GOSHI	987	E:0	RecName: Full=Catalase isozyme 1;^Eukaryota; Viridiplantae; Streptophyta; Embryophyta; Tracheophyta; Spermatophyta; Magnoliophyta; eudicotyledons; Gunneridae; Pentapetalae; rosids; malvids; Malvales; Malvaceae; Malvoideae; Gossypium	CATA1_GOSHI	988	E:0	RecName: Full=Catalase isozyme 1;^Eukaryota; Viridiplantae; Streptophyta; Embryophyta; Tracheophyta; Spermatophyta; Magnoliophyta; eudicotyledons; Gunneridae; Pentapetalae; rosids; malvids; Malvales; Malvaceae; Malvoideae; Gossypium	PF00199.18	Catalase	Catalase	.	.	.	.	.	GO:0042744|hydrogen peroxide catabolic process;GO:0006979|response to oxidative stress;GO:0009845|seed germinationGO:0055114|oxidation-reduction process	GO:0004096|catalase activity;GO:0020037|heme binding;GO:0046872|metal ion bindingGO:0004096|catalase activity;GO:0020037|heme binding	GO:0009514|glyoxysome;GO:0005634|nucleus
f2p60_1814_23063	-1.58996	1.0866e-113	down	yes	-0.958927	4.81834e-50	down	no	-0.291426	3.16586e-05	down	no	0.183847	0.00668046	up	no	0.563103	3.08351e-08	up	no	Gene.11537::PuPacbio_f2p60_1814_transcript23063_g1::g.11537::m.11537	2-1534[+]	gi|566170557|ref|XM_002306391.2|	3232	E:0	Populus trichocarpa hypothetical protein (POPTR_0005s10340g) mRNA, complete cds	gi|224081479|ref|XP_002306427.1|	1024	E:0	hypothetical protein POPTR_0005s10340g [Populus trichocarpa]	CATA2_ARATH	958	E:0	RecName: Full=Catalase-2;^Eukaryota; Viridiplantae; Streptophyta; Embryophyta; Tracheophyta; Spermatophyta; Magnoliophyta; eudicotyledons; Gunneridae; Pentapetalae; rosids; malvids; Brassicales; Brassicaceae; Camelineae; Arabidopsis	CATA2_ARATH	958	E:0	RecName: Full=Catalase-2;^Eukaryota; Viridiplantae; Streptophyta; Embryophyta; Tracheophyta; Spermatophyta; Magnoliophyta; eudicotyledons; Gunneridae; Pentapetalae; rosids; malvids; Brassicales; Brassicaceae; Camelineae; Arabidopsis	PF00199.18	Catalase	Catalase	COG0753	Catalase	.	.	.	GO:0008219|cell death;GO:0045454|cell redox homeostasis;GO:0006995|cellular response to nitrogen starvation;GO:0016036|cellular response to phosphate starvation;GO:0009970|cellular response to sulfate starvation;GO:0042744|hydrogen peroxide catabolic process;GO:0009648|photoperiodism;GO:0009409|response to cold;GO:0042542|response to hydrogen peroxide;GO:0009416|response to light stimulus;GO:0006…	GO:0004096|catalase activity;GO:0050897|cobalt ion binding;GO:0020037|heme bindingGO:0004096|catalase activity;GO:0020037|heme binding	GO:0009507|chloroplast;GO:0022626|cytosolic ribosome;GO:0009514|glyoxysome;GO:0005739|mitochondrion;GO:0005777|peroxisome;GO:0010319|stromule
f2p13_963_30411	-1.04547	1.43071e-39	down	yes	-0.486179	1.50415e-13	down	no	-0.20179	0.0772118	down	no	-0.158956	0.0226896	down	no	-0.131816	0.0983691	down	no	Gene.14981::PuPacbio_f2p13_963_transcript30411_g1::g.14981::m.14981	119-439[+]	gi|566148054|ref|XM_002299499.2|	1631	E:0	Populus trichocarpa hypothetical protein (POPTR_0001s09280g) mRNA, complete cds	gi|743852418|ref|XP_011029255.1|	190	E:1e-91	PREDICTED: probable glutathione peroxidase 8 [Populus euphratica]	GPX8_ARATH	160	E:7e-70	RecName: Full=Probable glutathione peroxidase 8;^Eukaryota; Viridiplantae; Streptophyta; Embryophyta; Tracheophyta; Spermatophyta; Magnoliophyta; eudicotyledons; Gunneridae; Pentapetalae; rosids; malvids; Brassicales; Brassicaceae; Camelineae; Arabidopsis	GPX4_MESCR	167	E:5e-52	RecName: Full=Probable phospholipid hydroperoxide glutathione peroxidase;^Eukaryota; Viridiplantae; Streptophyta; Embryophyta; Tracheophyta; Spermatophyta; Magnoliophyta; eudicotyledons; Gunneridae; Pentapetalae; Caryophyllales; Aizoaceae; Mesembryanthemum; Cryophytum	PF00255.18	GSHPx	Glutathione peroxidase	.	.	.	.	.	GO:0006979|response to oxidative stressGO:0006979|response to oxidative stress;GO:0055114|oxidation-reduction process	GO:0004602|glutathione peroxidase activity;GO:0047066|phospholipid-hydroperoxide glutathione peroxidase activityGO:0004602|glutathione peroxidase activity;GO:0016209|antioxidant activity;GO:0016491|oxidoreductase activity	GO:0005737|cytoplasm
f4p60_919_11774	0.329836	0.000285391	up	no	0.329754	0.000159822	up	no	-0.121703	0.231675	down	no	-0.348653	NA	down	no	-1.08622	8.39337e-09	down	yes	Gene.6545::PuPacbio_f4p60_919_transcript11774_g1::g.6545::m.6545	2-682[+]	gi|61287175|dbj|AB190439.1|	1428	E:0	Populus alba x Populus tremula var. glandulosa mRNA for glutathione S-transferase GST 18, complete cds, clone: PO3021G10	gi|61287176|dbj|BAD91093.1|	403	E:2e-139	glutathione S-transferase GST 18 [Populus alba x Populus glandulosa]	GST23_MAIZE	188	E:2e-56	RecName: Full=Glutathione transferase GST 23;^Eukaryota; Viridiplantae; Streptophyta; Embryophyta; Tracheophyta; Spermatophyta; Magnoliophyta; Liliopsida; Poales; Poaceae; PACMAD clade; Panicoideae; Andropogonodae; Andropogoneae; Tripsacinae; Zea	GST23_MAIZE	206	E:9e-65	RecName: Full=Glutathione transferase GST 23;^Eukaryota; Viridiplantae; Streptophyta; Embryophyta; Tracheophyta; Spermatophyta; Magnoliophyta; Liliopsida; Poales; Poaceae; PACMAD clade; Panicoideae; Andropogonodae; Andropogoneae; Tripsacinae; Zea	PF02798.19	GST_N	Glutathione S-transferase, N-terminal domain	ENOG410XSIX	glutathione Stransferase	.	.	.	GO:0006952|defense response	GO:0004364|glutathione transferase activityGO:0005515|protein binding	.
f2p60_903_31165	-0.353327	0.0103454	down	no	0.0347753	0.781073	up	no	-0.415399	0.00348359	down	no	0.0135642	NA	up	no	-1.18615	2.36734e-05	down	yes	Gene.15303::PuPacbio_f2p60_903_transcript31165_g5::g.15303::m.15303	1-672[+]	gi|566209944|ref|XM_002323555.2|	1491	E:0	Populus trichocarpa glutathione S-transferase GST 15 family protein (POPTR_0016s12600g) mRNA, complete cds	gi|566209945|ref|XP_002323591.2|	415	E:3e-144	glutathione S-transferase GST 15 family protein [Populus trichocarpa]	GST23_MAIZE	207	E:9e-64	RecName: Full=Glutathione transferase GST 23;^Eukaryota; Viridiplantae; Streptophyta; Embryophyta; Tracheophyta; Spermatophyta; Magnoliophyta; Liliopsida; Poales; Poaceae; PACMAD clade; Panicoideae; Andropogonodae; Andropogoneae; Tripsacinae; Zea	GST23_MAIZE	219	E:1e-69	RecName: Full=Glutathione transferase GST 23;^Eukaryota; Viridiplantae; Streptophyta; Embryophyta; Tracheophyta; Spermatophyta; Magnoliophyta; Liliopsida; Poales; Poaceae; PACMAD clade; Panicoideae; Andropogonodae; Andropogoneae; Tripsacinae; Zea	PF02798.19	GST_N	Glutathione S-transferase, N-terminal domain	ENOG410XSIX	glutathione Stransferase	.	.	.	GO:0006952|defense response	GO:0004364|glutathione transferase activityGO:0005515|protein binding	.
f2p60_822_12727	-1.5436	1.41035e-08	down	yes	-0.387359	0.0754994	down	no	-1.06828	1.58432e-05	down	yes	-0.451941	0.173699	down	no	-0.849294	0.00565631	down	no	Gene.6852::PuPacbio_f2p60_822_transcript12727_g1::g.6852::m.6852	1-678[+]	gi|743921367|ref|XM_011006444.1|	1267	E:0	PREDICTED: Populus euphratica probable glutathione S-transferase (LOC105111162), mRNA	gi|566209947|ref|XP_006373996.1|	412	E:1e-143	hypothetical protein POPTR_0016s12610g [Populus trichocarpa]	GST23_MAIZE	207	E:2e-64	RecName: Full=Glutathione transferase GST 23;^Eukaryota; Viridiplantae; Streptophyta; Embryophyta; Tracheophyta; Spermatophyta; Magnoliophyta; Liliopsida; Poales; Poaceae; PACMAD clade; Panicoideae; Andropogonodae; Andropogoneae; Tripsacinae; Zea	GST23_MAIZE	219	E:6e-70	RecName: Full=Glutathione transferase GST 23;^Eukaryota; Viridiplantae; Streptophyta; Embryophyta; Tracheophyta; Spermatophyta; Magnoliophyta; Liliopsida; Poales; Poaceae; PACMAD clade; Panicoideae; Andropogonodae; Andropogoneae; Tripsacinae; Zea	PF02798.19	GST_N	Glutathione S-transferase, N-terminal domain	ENOG410XSIX	glutathione Stransferase	.	.	.	GO:0006952|defense response	GO:0004364|glutathione transferase activityGO:0005515|protein binding	.
f3p60_1525_6924	2.51232	0	up	yes	2.03423	0	up	yes	1.21945	1.93542e-79	up	yes	0.736059	7.68608e-35	up	no	0.527322	3.99494e-10	up	no	Gene.4547::PuPacbio_f3p60_1525_transcript6924_g2::g.4547::m.4547	83-805[+]	gi|743909883|ref|XM_011050132.1|	1862	E:0	PREDICTED: Populus euphratica glutathione S-transferase L3-like (LOC105142479), transcript variant X2, mRNA	gi|566209344|ref|XP_002322845.2|	483	E:3e-167	In2-1 family protein [Populus trichocarpa]	GSTL3_ARATH	339	E:2e-112	RecName: Full=Glutathione S-transferase L3;^Eukaryota; Viridiplantae; Streptophyta; Embryophyta; Tracheophyta; Spermatophyta; Magnoliophyta; eudicotyledons; Gunneridae; Pentapetalae; rosids; malvids; Brassicales; Brassicaceae; Camelineae; Arabidopsis	GSTL3_ARATH	340	E:1e-116	RecName: Full=Glutathione S-transferase L3;^Eukaryota; Viridiplantae; Streptophyta; Embryophyta; Tracheophyta; Spermatophyta; Magnoliophyta; eudicotyledons; Gunneridae; Pentapetalae; rosids; malvids; Brassicales; Brassicaceae; Camelineae; Arabidopsis	PF02798.19	GST_N	Glutathione S-transferase, N-terminal domain	ENOG410XSIX	glutathione Stransferase	.	.	.	GO:0006749|glutathione metabolic process;GO:0010731|protein glutathionylation;GO:0046686|response to cadmium ion;GO:0009636|response to toxic substance	GO:0004364|glutathione transferase activityGO:0005515|protein binding	GO:0005829|cytosol
f2p60_1104_10166	2.43471	0	up	yes	2.06681	1.81988e-234	up	yes	1.23047	4.96365e-64	up	yes	0.727527	2.23502e-08	up	no	0.726034	6.79487e-12	up	no	Gene.5934::PuPacbio_f2p60_1104_transcript10166_g2::g.5934::m.5934	83-805[+]	gi|743909883|ref|XM_011050132.1|	1668	E:0	PREDICTED: Populus euphratica glutathione S-transferase L3-like (LOC105142479), transcript variant X2, mRNA	gi|566209344|ref|XP_002322845.2|	483	E:2e-169	In2-1 family protein [Populus trichocarpa]	GSTL3_ARATH	339	E:2e-114	RecName: Full=Glutathione S-transferase L3;^Eukaryota; Viridiplantae; Streptophyta; Embryophyta; Tracheophyta; Spermatophyta; Magnoliophyta; eudicotyledons; Gunneridae; Pentapetalae; rosids; malvids; Brassicales; Brassicaceae; Camelineae; Arabidopsis	GSTL3_ARATH	340	E:1e-116	RecName: Full=Glutathione S-transferase L3;^Eukaryota; Viridiplantae; Streptophyta; Embryophyta; Tracheophyta; Spermatophyta; Magnoliophyta; eudicotyledons; Gunneridae; Pentapetalae; rosids; malvids; Brassicales; Brassicaceae; Camelineae; Arabidopsis	PF02798.19	GST_N	Glutathione S-transferase, N-terminal domain	ENOG410XSIX	glutathione Stransferase	.	.	.	GO:0006749|glutathione metabolic process;GO:0010731|protein glutathionylation;GO:0046686|response to cadmium ion;GO:0009636|response to toxic substance	GO:0004364|glutathione transferase activityGO:0005515|protein binding	GO:0005829|cytosol
f2p40_1265_8944	1.9749	2.19324e-145	up	yes	1.47546	4.07279e-64	up	yes	1.05943	1.32949e-31	up	yes	0.692427	3.58882e-11	up	no	0.433513	9.86684e-05	up	no	Gene.5433::PuPacbio_f2p40_1265_transcript8944_g1::g.5433::m.5433	83-805[+]	gi|743909883|ref|XM_011050132.1|	1860	E:0	PREDICTED: Populus euphratica glutathione S-transferase L3-like (LOC105142479), transcript variant X2, mRNA	gi|566209344|ref|XP_002322845.2|	483	E:1e-168	In2-1 family protein [Populus trichocarpa]	GSTL3_ARATH	339	E:1e-113	RecName: Full=Glutathione S-transferase L3;^Eukaryota; Viridiplantae; Streptophyta; Embryophyta; Tracheophyta; Spermatophyta; Magnoliophyta; eudicotyledons; Gunneridae; Pentapetalae; rosids; malvids; Brassicales; Brassicaceae; Camelineae; Arabidopsis	GSTL3_ARATH	340	E:1e-116	RecName: Full=Glutathione S-transferase L3;^Eukaryota; Viridiplantae; Streptophyta; Embryophyta; Tracheophyta; Spermatophyta; Magnoliophyta; eudicotyledons; Gunneridae; Pentapetalae; rosids; malvids; Brassicales; Brassicaceae; Camelineae; Arabidopsis	PF02798.19	GST_N	Glutathione S-transferase, N-terminal domain	ENOG410XSIX	glutathione Stransferase	.	.	.	GO:0006749|glutathione metabolic process;GO:0010731|protein glutathionylation;GO:0046686|response to cadmium ion;GO:0009636|response to toxic substance	GO:0004364|glutathione transferase activityGO:0005515|protein binding	GO:0005829|cytosol
f11p60_1009_30005	0.267107	1.56233e-06	up	no	1.63362	1.11598e-278	up	yes	1.50994	2.35222e-78	up	yes	0.764185	1.3368e-17	up	no	0.305085	3.67584e-05	up	no	Gene.14816::PuPacbio_f11p60_1009_transcript30005_g1::g.14816::m.14816	102-764[+]	gi|566154413|ref|XM_002300447.2|	1731	E:0	Populus trichocarpa hypothetical protein (POPTR_0001s42760g) mRNA, complete cds	gi|566154414|ref|XP_002300483.2|	448	E:1e-156	hypothetical protein POPTR_0001s42760g [Populus trichocarpa]	GSTX4_TOBAC	348	E:2e-118	RecName: Full=Probable glutathione S-transferase;^Eukaryota; Viridiplantae; Streptophyta; Embryophyta; Tracheophyta; Spermatophyta; Magnoliophyta; eudicotyledons; Gunneridae; Pentapetalae; asterids; lamiids; Solanales; Solanaceae; Nicotianoideae; Nicotianeae; Nicotiana	GSTX4_TOBAC	347	E:4e-120	RecName: Full=Probable glutathione S-transferase;^Eukaryota; Viridiplantae; Streptophyta; Embryophyta; Tracheophyta; Spermatophyta; Magnoliophyta; eudicotyledons; Gunneridae; Pentapetalae; asterids; lamiids; Solanales; Solanaceae; Nicotianoideae; Nicotianeae; Nicotiana	PF02798.19	GST_N	Glutathione S-transferase, N-terminal domain	.	.	.	.	.	GO:0009734|auxin-activated signaling pathway	GO:0004364|glutathione transferase activityGO:0005515|protein binding	.
f2p60_972_303732	1.15052	3.48543e-110	up	yes	0.841148	4.66587e-61	up	no	0.663574	7.23452e-26	up	no	0.412052	0.131751	up	no	0.307985	0.000282585	up	no	Gene.14960::PuPacbio_f2p60_972_transcript30373_g12::g.14960::m.14960	3-713[+]	gi|743858555|ref|XM_011032193.1|	1544	E:0	PREDICTED: Populus euphratica probable glutathione S-transferase (LOC105129921), mRNA	gi|566189736|ref|XP_006378334.1|	459	E:8e-161	hypothetical protein POPTR_0010s08170g [Populus trichocarpa]	GSTX6_SOYBN	231	E:5e-73	RecName: Full=Probable glutathione S-transferase;^Eukaryota; Viridiplantae; Streptophyta; Embryophyta; Tracheophyta; Spermatophyta; Magnoliophyta; eudicotyledons; Gunneridae; Pentapetalae; rosids; fabids; Fabales; Fabaceae; Papilionoideae; Phaseoleae; Glycine; Soja	GSTX6_SOYBN	231	E:2e-74	RecName: Full=Probable glutathione S-transferase;^Eukaryota; Viridiplantae; Streptophyta; Embryophyta; Tracheophyta; Spermatophyta; Magnoliophyta; eudicotyledons; Gunneridae; Pentapetalae; rosids; fabids; Fabales; Fabaceae; Papilionoideae; Phaseoleae; Glycine; Soja	PF02798.19	GST_N	Glutathione S-transferase, N-terminal domain	ENOG410XSIX	glutathione Stransferase	.	.	.	GO:0006749|glutathione metabolic process;GO:0009737|response to abscisic acid;GO:0009733|response to auxin;GO:0009735|response to cytokinin;GO:0009739|response to gibberellin;GO:0009408|response to heat;GO:0010038|response to metal ion;GO:0009407|toxin catabolic process	GO:0004364|glutathione transferase activityGO:0005515|protein binding	GO:0005737|cytoplasm
f2p60_1054_29478	1.12381	2.02762e-99	up	yes	1.88007	1.08147e-292	up	yes	0.139966	0.0406181	up	no	0.188676	NA	up	no	-0.610269	7.82381e-16	down	no	Gene.14605::PuPacbio_f2p60_1054_transcript29478_g6::g.14605::m.14605	1-687[+]	gi|566189533|ref|XM_002314491.2|	1397	E:0	Populus trichocarpa hypothetical protein (POPTR_0010s07090g) mRNA, complete cds	gi|283135848|gb|ADB11315.1|	362	E:3e-122	tau class glutathione transferase GSTU11 [Populus trichocarpa]	GSTX6_SOYBN	189	E:2e-56	RecName: Full=Probable glutathione S-transferase;^Eukaryota; Viridiplantae; Streptophyta; Embryophyta; Tracheophyta; Spermatophyta; Magnoliophyta; eudicotyledons; Gunneridae; Pentapetalae; rosids; fabids; Fabales; Fabaceae; Papilionoideae; Phaseoleae; Glycine; Soja	GSTX6_SOYBN	224	E:1e-71	RecName: Full=Probable glutathione S-transferase;^Eukaryota; Viridiplantae; Streptophyta; Embryophyta; Tracheophyta; Spermatophyta; Magnoliophyta; eudicotyledons; Gunneridae; Pentapetalae; rosids; fabids; Fabales; Fabaceae; Papilionoideae; Phaseoleae; Glycine; Soja	PF02798.19	GST_N	Glutathione S-transferase, N-terminal domain	ENOG410XSIX	glutathione Stransferase	.	.	.	GO:0006749|glutathione metabolic process;GO:0009737|response to abscisic acid;GO:0009733|response to auxin;GO:0009735|response to cytokinin;GO:0009739|response to gibberellin;GO:0009408|response to heat;GO:0010038|response to metal ion;GO:0009407|toxin catabolic process	GO:0004364|glutathione transferase activityGO:0005515|protein binding	GO:0005737|cytoplasm
f2p60_1045_10848	1.31633	8.52024e-07	up	yes	1.70644	6.84823e-13	up	yes	0.389337	0.16416	up	no	0.65477	0.0134052	up	no	0.574604	0.022718	up	no	Gene.6209::PuPacbio_f2p60_1045_transcript10848_g7::g.6209::m.6209	99-500[+]	gi|743890609|ref|XM_011040794.1|	1592	E:0	PREDICTED: Populus euphratica probable glutathione S-transferase (LOC105135766), mRNA	gi|743890610|ref|XP_011039096.1|	248	E:6e-114	PREDICTED: probable glutathione S-transferase [Populus euphratica]	GSTX6_SOYBN	158	E:5e-53	RecName: Full=Probable glutathione S-transferase;^Eukaryota; Viridiplantae; Streptophyta; Embryophyta; Tracheophyta; Spermatophyta; Magnoliophyta; eudicotyledons; Gunneridae; Pentapetalae; rosids; fabids; Fabales; Fabaceae; Papilionoideae; Phaseoleae; Glycine; Soja	GSTU7_ARATH	158	E:2e-47	RecName: Full=Glutathione S-transferase U7;^Eukaryota; Viridiplantae; Streptophyta; Embryophyta; Tracheophyta; Spermatophyta; Magnoliophyta; eudicotyledons; Gunneridae; Pentapetalae; rosids; malvids; Brassicales; Brassicaceae; Camelineae; Arabidopsis	PF13417.5	GST_N_3	Glutathione S-transferase, N-terminal domain	ENOG410XSIX	glutathione Stransferase	.	.	.	GO:0006749|glutathione metabolic process;GO:0009751|response to salicylic acid;GO:0009636|response to toxic substance;GO:0009407|toxin catabolic process	GO:0004364|glutathione transferase activityGO:0005515|protein binding	GO:0005737|cytoplasm;GO:0005829|cytosol
f4p60_1020_29979	1.3919	1.11491e-151	up	yes	0.931435	6.78819e-70	up	no	0.672909	8.39289e-27	up	no	0.499072	NA	up	no	0.121185	0.0860564	up	no	Gene.14803::PuPacbio_f4p60_1020_transcript29979_g3::g.14803::m.14803	68-727[+]	gi|743897000|ref|XM_011043478.1|	1550	E:0	PREDICTED: Populus euphratica probable glutathione S-transferase parA (LOC105137659), transcript variant X1, mRNA	gi|283136066|gb|ADB11352.1|	434	E:3e-151	tau class glutathione transferase GSTU15 [Populus trichocarpa]	GSTXA_TOBAC	330	E:3e-111	RecName: Full=Probable glutathione S-transferase parA;^Eukaryota; Viridiplantae; Streptophyta; Embryophyta; Tracheophyta; Spermatophyta; Magnoliophyta; eudicotyledons; Gunneridae; Pentapetalae; asterids; lamiids; Solanales; Solanaceae; Nicotianoideae; Nicotianeae; Nicotiana	GSTXA_TOBAC	330	E:3e-113	RecName: Full=Probable glutathione S-transferase parA;^Eukaryota; Viridiplantae; Streptophyta; Embryophyta; Tracheophyta; Spermatophyta; Magnoliophyta; eudicotyledons; Gunneridae; Pentapetalae; asterids; lamiids; Solanales; Solanaceae; Nicotianoideae; Nicotianeae; Nicotiana	PF02798.19	GST_N	Glutathione S-transferase, N-terminal domain	.	.	.	.	.	GO:0009734|auxin-activated signaling pathway	GO:0004364|glutathione transferase activityGO:0005515|protein binding	.
f3p60_913_11828	1.86573	5.46057e-70	up	yes	1.01893	1.40249e-18	up	yes	0.434243	0.00129893	up	no	0.539567	NA	up	no	-0.0788146	0.593695	down	no	.	.	gi|566245691|ref|XM_002326034.2|	1260	E:0	Populus trichocarpa hypothetical protein (POPTR_0019s15100g) mRNA, complete cds	gi|283135854|gb|ADB11318.1|	300	E:7e-103	tau class glutathione transferase GSTU16 [Populus trichocarpa]	GSTXA_TOBAC	226	E:2e-73	RecName: Full=Probable glutathione S-transferase parA;^Eukaryota; Viridiplantae; Streptophyta; Embryophyta; Tracheophyta; Spermatophyta; Magnoliophyta; eudicotyledons; Gunneridae; Pentapetalae; asterids; lamiids; Solanales; Solanaceae; Nicotianoideae; Nicotianeae; Nicotiana	.	.	.	.	.	.	.	.	.	.	.	.	GO:0009734|auxin-activated signaling pathway	GO:0004364|glutathione transferase activity	.
f2p60_977_11315	1.40001	4.91495e-12	up	yes	0.365801	0.0737465	up	no	0.452591	0.0279647	up	no	0.313484	0.157627	up	no	-0.074185	0.754341	down	no	Gene.6369::PuPacbio_f2p60_977_transcript11315_g4::g.6369::m.6369	68-406[+]	gi|566245680|ref|XM_006371615.1|	857	E:0	Populus trichocarpa hypothetical protein (POPTR_0019s150901g) mRNA, partial cds	gi|283136066|gb|ADB11352.1|	233	E:2e-114	tau class glutathione transferase GSTU15 [Populus trichocarpa]	GSTXA_TOBAC	167	E:6e-84	RecName: Full=Probable glutathione S-transferase parA;^Eukaryota; Viridiplantae; Streptophyta; Embryophyta; Tracheophyta; Spermatophyta; Magnoliophyta; eudicotyledons; Gunneridae; Pentapetalae; asterids; lamiids; Solanales; Solanaceae; Nicotianoideae; Nicotianeae; Nicotiana	GSTUM_ARATH	171	E:9e-53	RecName: Full=Glutathione S-transferase U22;^Eukaryota; Viridiplantae; Streptophyta; Embryophyta; Tracheophyta; Spermatophyta; Magnoliophyta; eudicotyledons; Gunneridae; Pentapetalae; rosids; malvids; Brassicales; Brassicaceae; Camelineae; Arabidopsis	PF02798.19	GST_N	Glutathione S-transferase, N-terminal domain	ENOG410XSIX	glutathione Stransferase	.	.	.	GO:0006749|glutathione metabolic process;GO:0009636|response to toxic substance;GO:0009407|toxin catabolic process	GO:0004364|glutathione transferase activityGO:0005515|protein binding	GO:0005737|cytoplasm;GO:0005829|cytosol
f9p60_892_31310	1.99458	7.51818e-155	up	yes	1.38993	1.36834e-78	up	yes	0.570601	2.30922e-09	up	no	-0.320279	NA	down	no	-1.29677	4.04089e-16	down	yes	Gene.15352::PuPacbio_f9p60_892_transcript31310_g1::g.15352::m.15352	3-725[+]	gi|566194939|ref|XM_002317439.2|	1351	E:0	Populus trichocarpa hypothetical protein (POPTR_0011s11450g) mRNA, complete cds	gi|566256673|ref|XP_006388265.1|	436	E:2e-151	hypothetical protein POPTR_0256s00200g [Populus trichocarpa]	GSTXC_TOBAC	280	E:2e-92	RecName: Full=Probable glutathione S-transferase parC;^Eukaryota; Viridiplantae; Streptophyta; Embryophyta; Tracheophyta; Spermatophyta; Magnoliophyta; eudicotyledons; Gunneridae; Pentapetalae; asterids; lamiids; Solanales; Solanaceae; Nicotianoideae; Nicotianeae; Nicotiana	GSTXC_TOBAC	280	E:2e-93	RecName: Full=Probable glutathione S-transferase parC;^Eukaryota; Viridiplantae; Streptophyta; Embryophyta; Tracheophyta; Spermatophyta; Magnoliophyta; eudicotyledons; Gunneridae; Pentapetalae; asterids; lamiids; Solanales; Solanaceae; Nicotianoideae; Nicotianeae; Nicotiana	PF13417.5	GST_N_3	Glutathione S-transferase, N-terminal domain	.	.	.	.	.	GO:0009734|auxin-activated signaling pathway	GO:0004364|glutathione transferase activityGO:0005515|protein binding	.
f2p60_993_30050	1.82209	6.65372e-09	up	yes	0.795426	0.025596	up	no	0.0705331	0.84792	up	no	0.236966	0.473422	up	no	-0.0723324	0.824215	down	no	Gene.14839::PuPacbio_f2p60_993_transcript30050_g4::g.14839::m.14839	461-829[+]	gi|256782831|gb|AC237585.1|	1430	E:0	Populus trichocarpa clone POP011-E13, complete sequence	gi|566256673|ref|XP_006388265.1|	422	E:9e-146	hypothetical protein POPTR_0256s00200g [Populus trichocarpa]	GSTXC_TOBAC	266	E:3e-86	RecName: Full=Probable glutathione S-transferase parC;^Eukaryota; Viridiplantae; Streptophyta; Embryophyta; Tracheophyta; Spermatophyta; Magnoliophyta; eudicotyledons; Gunneridae; Pentapetalae; asterids; lamiids; Solanales; Solanaceae; Nicotianoideae; Nicotianeae; Nicotiana	GSTXC_TOBAC	137	E:3e-39	RecName: Full=Probable glutathione S-transferase parC;^Eukaryota; Viridiplantae; Streptophyta; Embryophyta; Tracheophyta; Spermatophyta; Magnoliophyta; eudicotyledons; Gunneridae; Pentapetalae; asterids; lamiids; Solanales; Solanaceae; Nicotianoideae; Nicotianeae; Nicotiana	PF00043.24	GST_C	Glutathione S-transferase, C-terminal domain	.	.	.	.	.	GO:0009734|auxin-activated signaling pathway	GO:0004364|glutathione transferase activity	.
f2p60_894_312621	3.14142	1.16143e-159	up	yes	2.11116	7.67945e-62	up	yes	1.13205	3.43082e-13	up	yes	-0.0274185	0.928092	down	no	-0.974205	1.66558e-06	down	no	Gene.15340::PuPacbio_f2p60_894_transcript31262_g11::g.15340::m.15340	2-721[+]	gi|566256672|ref|XM_006388203.1|	1343	E:0	Populus trichocarpa hypothetical protein (POPTR_0256s00200g) mRNA, complete cds	gi|566256673|ref|XP_006388265.1|	473	E:4e-166	hypothetical protein POPTR_0256s00200g [Populus trichocarpa]	GSTXC_TOBAC	283	E:2e-93	RecName: Full=Probable glutathione S-transferase parC;^Eukaryota; Viridiplantae; Streptophyta; Embryophyta; Tracheophyta; Spermatophyta; Magnoliophyta; eudicotyledons; Gunneridae; Pentapetalae; asterids; lamiids; Solanales; Solanaceae; Nicotianoideae; Nicotianeae; Nicotiana	GSTXC_TOBAC	283	E:2e-94	RecName: Full=Probable glutathione S-transferase parC;^Eukaryota; Viridiplantae; Streptophyta; Embryophyta; Tracheophyta; Spermatophyta; Magnoliophyta; eudicotyledons; Gunneridae; Pentapetalae; asterids; lamiids; Solanales; Solanaceae; Nicotianoideae; Nicotianeae; Nicotiana	PF02798.19	GST_N	Glutathione S-transferase, N-terminal domain	.	.	.	.	.	GO:0009734|auxin-activated signaling pathway	GO:0004364|glutathione transferase activityGO:0005515|protein binding	.
f2p42_916_30963	1.6528	7.46657e-81	up	yes	1.09324	2.01991e-25	up	yes	0.472558	3.58707e-06	up	no	-0.222482	0.275742	down	no	-0.633404	5.17706e-07	down	no	Gene.15212::PuPacbio_f2p42_916_transcript30963_g1::g.15212::m.15212	2-721[+]	gi|566256672|ref|XM_006388203.1|	1277	E:0	Populus trichocarpa hypothetical protein (POPTR_0256s00200g) mRNA, complete cds	gi|566256673|ref|XP_006388265.1|	464	E:3e-162	hypothetical protein POPTR_0256s00200g [Populus trichocarpa]	GSTXC_TOBAC	281	E:7e-93	RecName: Full=Probable glutathione S-transferase parC;^Eukaryota; Viridiplantae; Streptophyta; Embryophyta; Tracheophyta; Spermatophyta; Magnoliophyta; eudicotyledons; Gunneridae; Pentapetalae; asterids; lamiids; Solanales; Solanaceae; Nicotianoideae; Nicotianeae; Nicotiana	GSTXC_TOBAC	281	E:6e-94	RecName: Full=Probable glutathione S-transferase parC;^Eukaryota; Viridiplantae; Streptophyta; Embryophyta; Tracheophyta; Spermatophyta; Magnoliophyta; eudicotyledons; Gunneridae; Pentapetalae; asterids; lamiids; Solanales; Solanaceae; Nicotianoideae; Nicotianeae; Nicotiana	PF02798.19	GST_N	Glutathione S-transferase, N-terminal domain	.	.	.	.	.	GO:0009734|auxin-activated signaling pathway	GO:0004364|glutathione transferase activityGO:0005515|protein binding	.
f2p60_290_38802	-1.06888	0.0243403	down	yes	-0.499241	0.215702	down	no	-0.505838	0.186866	down	no	-0.463865	0.157011	down	no	-0.232342	0.469941	down	no	.	.	gi|118485633|gb|EF146610.1|	451	E:5e-124	Populus trichocarpa clone WS01210_I16 unknown mRNA	.	.	.	.	.	.	.	.	.	.	.	.	.	.	.	.	.	.	.	.	.	.	.
f3p60_1160_28302	-1.21676	1.80602e-168	down	yes	-0.383767	5.27132e-21	down	no	0.340176	8.49427e-12	up	no	0.373222	9.39475e-05	up	no	0.502064	3.14023e-06	up	no	Gene.14109::PuPacbio_f3p60_1160_transcript28302_g7::g.14109::m.14109	118-765[+]	gi|566155718|ref|XM_002301905.2|	1849	E:0	Populus trichocarpa hypothetical protein (POPTR_0002s01650g) mRNA, complete cds	gi|224065727|ref|XP_002301941.1|	445	E:1e-154	hypothetical protein POPTR_0002s01650g [Populus trichocarpa]	GSTFB_ARATH	196	E:1e-58	RecName: Full=Glutathione S-transferase F11;^Eukaryota; Viridiplantae; Streptophyta; Embryophyta; Tracheophyta; Spermatophyta; Magnoliophyta; eudicotyledons; Gunneridae; Pentapetalae; rosids; malvids; Brassicales; Brassicaceae; Camelineae; Arabidopsis	GSTFB_ARATH	196	E:6e-61	RecName: Full=Glutathione S-transferase F11;^Eukaryota; Viridiplantae; Streptophyta; Embryophyta; Tracheophyta; Spermatophyta; Magnoliophyta; eudicotyledons; Gunneridae; Pentapetalae; rosids; malvids; Brassicales; Brassicaceae; Camelineae; Arabidopsis	PF02798.19	GST_N	Glutathione S-transferase, N-terminal domain	COG0625	glutathione Stransferase	.	.	.	GO:0006749|glutathione metabolic process;GO:0006979|response to oxidative stress;GO:0009636|response to toxic substance;GO:0009407|toxin catabolic process	GO:0004364|glutathione transferase activityGO:0005515|protein binding	GO:0005737|cytoplasm;GO:0005829|cytosol
f4p60_1052_29481	0.545511	4.55449e-12	up	no	-0.270522	0.000336665	down	no	-1.10814	2.30778e-30	down	yes	0.27485	0.345402	up	no	0.0154341	0.844366	up	no	Gene.14606::PuPacbio_f4p60_1052_transcript29481_g2::g.14606::m.14606	98-742[+]	gi|566210817|ref|XM_006372423.1|	1694	E:0	Populus trichocarpa putative glutathione S-transferase family protein (POPTR_0017s02090g) mRNA, complete cds	gi|566210818|ref|XP_006372485.1|	438	E:1e-152	putative glutathione S-transferase family protein [Populus trichocarpa]	GSTFC_ARATH	265	E:9e-86	RecName: Full=Glutathione S-transferase F12;^Eukaryota; Viridiplantae; Streptophyta; Embryophyta; Tracheophyta; Spermatophyta; Magnoliophyta; eudicotyledons; Gunneridae; Pentapetalae; rosids; malvids; Brassicales; Brassicaceae; Camelineae; Arabidopsis	GSTFC_ARATH	265	E:8e-88	RecName: Full=Glutathione S-transferase F12;^Eukaryota; Viridiplantae; Streptophyta; Embryophyta; Tracheophyta; Spermatophyta; Magnoliophyta; eudicotyledons; Gunneridae; Pentapetalae; rosids; malvids; Brassicales; Brassicaceae; Camelineae; Arabidopsis	PF02798.19	GST_N	Glutathione S-transferase, N-terminal domain	COG0625	glutathione Stransferase	.	.	.	GO:0046283|anthocyanin-containing compound metabolic process;GO:0006749|glutathione metabolic process;GO:1900384|regulation of flavonol biosynthetic process;GO:0009636|response to toxic substance;GO:0009407|toxin catabolic process	GO:0043169|cation binding;GO:0004364|glutathione transferase activityGO:0005515|protein binding	GO:0005737|cytoplasm;GO:0005829|cytosol;GO:0005634|nucleus;GO:0009705|plant-type vacuole membrane
f3p60_1090_29044	0.141988	0.778763	up	no	0.115753	0.805403	up	no	2.0349	2.84657e-10	up	yes	0.283626	NA	up	no	-0.179839	0.584322	down	no	Gene.14428::PuPacbio_f3p60_1090_transcript29044_g3::g.14428::m.14428	158-817[+]	gi|118486097|gb|EF146849.1|	1844	E:0	Populus trichocarpa clone WS01214_P11 unknown mRNA	gi|283135866|gb|ADB11324.1|	448	E:5e-156	tau class glutathione transferase GSTU33 [Populus trichocarpa]	GSTX4_TOBAC	327	E:8e-110	RecName: Full=Probable glutathione S-transferase;^Eukaryota; Viridiplantae; Streptophyta; Embryophyta; Tracheophyta; Spermatophyta; Magnoliophyta; eudicotyledons; Gunneridae; Pentapetalae; asterids; lamiids; Solanales; Solanaceae; Nicotianoideae; Nicotianeae; Nicotiana	GSTX4_TOBAC	327	E:3e-112	RecName: Full=Probable glutathione S-transferase;^Eukaryota; Viridiplantae; Streptophyta; Embryophyta; Tracheophyta; Spermatophyta; Magnoliophyta; eudicotyledons; Gunneridae; Pentapetalae; asterids; lamiids; Solanales; Solanaceae; Nicotianoideae; Nicotianeae; Nicotiana	PF02798.19	GST_N	Glutathione S-transferase, N-terminal domain	.	.	.	.	.	GO:0009734|auxin-activated signaling pathway	GO:0004364|glutathione transferase activityGO:0005515|protein binding	.
f3p60_1230_9034	-0.581463	0.00302042	down	no	-0.734316	0.000110903	down	no	-1.20791	5.58473e-09	down	yes	-0.995317	9.12281e-07	down	no	-0.894615	2.08953e-05	down	no	.	.	gi|566147251|ref|XM_002299106.2|	1895	E:0	Populus trichocarpa hypothetical protein (POPTR_0001s04840g) mRNA, complete cds	gi|566147250|ref|XP_002299141.2|	330	E:2e-172	hypothetical protein POPTR_0001s04820g [Populus trichocarpa]	PER15_IPOBA	225	E:1e-103	RecName: Full=Peroxidase 15 {ECO:0000303|PubMed:17936696};^Eukaryota; Viridiplantae; Streptophyta; Embryophyta; Tracheophyta; Spermatophyta; Magnoliophyta; eudicotyledons; Gunneridae; Pentapetalae; asterids; lamiids; Solanales; Convolvulaceae; Ipomoeeae; Ipomoea	.	.	.	.	.	.	.	.	.	.	.	.	GO:0042744|hydrogen peroxide catabolic process;GO:0006979|response to oxidative stress	GO:0020037|heme binding;GO:0046872|metal ion binding;GO:0004601|peroxidase activity	GO:0005576|extracellular region
f3p60_1309_26798	0.128943	0.0227812	up	no	0.478322	2.62691e-18	up	no	-0.891903	3.43681e-41	down	no	-0.785401	4.73551e-10	down	no	-1.22806	2.26414e-20	down	yes	Gene.13427::PuPacbio_f3p60_1309_transcript26798_g2::g.13427::m.13427	56-1033[+]	gi|566201453|ref|XM_002319932.2|	2252	E:0	Populus trichocarpa peroxidase family protein (POPTR_0013s15250g) mRNA, complete cds	gi|566201454|ref|XP_002319968.2|	639	E:0	peroxidase family protein [Populus trichocarpa]	PER4_VITVI	488	E:3e-170	RecName: Full=Peroxidase 4 {ECO:0000250|UniProtKB:Q42578};^Eukaryota; Viridiplantae; Streptophyta; Embryophyta; Tracheophyta; Spermatophyta; Magnoliophyta; eudicotyledons; Gunneridae; Pentapetalae; rosids; Vitales; Vitaceae; Vitis	PER4_VITVI	507	E:7e-180	RecName: Full=Peroxidase 4 {ECO:0000250|UniProtKB:Q42578};^Eukaryota; Viridiplantae; Streptophyta; Embryophyta; Tracheophyta; Spermatophyta; Magnoliophyta; eudicotyledons; Gunneridae; Pentapetalae; rosids; Vitales; Vitaceae; Vitis	PF00141.22	peroxidase	Peroxidase	ENOG410YETZ	peroxidase	.	ExpAA=20.05^PredHel=1^Topology=i7-29o	.	GO:0042744|hydrogen peroxide catabolic process;GO:0006979|response to oxidative stressGO:0006979|response to oxidative stress;GO:0055114|oxidation-reduction process	GO:0020037|heme binding;GO:0046872|metal ion binding;GO:0004601|peroxidase activityGO:0004601|peroxidase activity;GO:0020037|heme binding	GO:0005576|extracellular region
f2p60_1352_8044	-1.50117	7.67752e-52	down	yes	-0.0756907	0.332615	down	no	-0.92577	2.23903e-24	down	no	-0.69626	NA	down	no	-1.99098	1.12132e-67	down	yes	Gene.5025::PuPacbio_f2p60_1352_transcript8044_g1::g.5025::m.5025	53-1006[+]	gi|566155771|ref|XM_002300653.2|	2023	E:0	Populus trichocarpa Peroxidase 64 precursor family protein (POPTR_0002s01960g) mRNA, complete cds	gi|225626267|gb|ACN97183.1|	603	E:0	peroxidase [Populus trichocarpa]	PER64_ARATH	482	E:5e-168	RecName: Full=Peroxidase 64;^Eukaryota; Viridiplantae; Streptophyta; Embryophyta; Tracheophyta; Spermatophyta; Magnoliophyta; eudicotyledons; Gunneridae; Pentapetalae; rosids; malvids; Brassicales; Brassicaceae; Camelineae; Arabidopsis	PER64_ARATH	496	E:7e-176	RecName: Full=Peroxidase 64;^Eukaryota; Viridiplantae; Streptophyta; Embryophyta; Tracheophyta; Spermatophyta; Magnoliophyta; eudicotyledons; Gunneridae; Pentapetalae; rosids; malvids; Brassicales; Brassicaceae; Camelineae; Arabidopsis	PF00141.22	peroxidase	Peroxidase	ENOG410YE7F	peroxidase	.	.	.	GO:0042744|hydrogen peroxide catabolic process;GO:0009664|plant-type cell wall organization;GO:0006979|response to oxidative stressGO:0006979|response to oxidative stress;GO:0055114|oxidation-reduction process	GO:0020037|heme binding;GO:0046872|metal ion binding;GO:0004601|peroxidase activityGO:0004601|peroxidase activity;GO:0020037|heme binding	GO:0005576|extracellular region;GO:0009505|plant-type cell wall;GO:0009506|plasmodesma
f4p60_1273_8677	-1.04056	1.34308e-37	down	yes	-1.68365	9.81181e-92	down	yes	-0.841515	7.21172e-24	down	no	-1.54403	1.28952e-54	down	yes	-1.71781	1.72972e-42	down	yes	Gene.5330::PuPacbio_f4p60_1273_transcript8677_g1::g.5330::m.5330	139-1089[+]	gi|566166450|ref|XM_002305315.2|	2106	E:0	Populus trichocarpa peroxidase family protein (POPTR_0004s14240g) mRNA, complete cds	gi|224077664|ref|XP_002305351.1|	640	E:0	peroxidase family protein [Populus trichocarpa]	PER47_ARATH	457	E:2e-158	RecName: Full=Peroxidase 47;^Eukaryota; Viridiplantae; Streptophyta; Embryophyta; Tracheophyta; Spermatophyta; Magnoliophyta; eudicotyledons; Gunneridae; Pentapetalae; rosids; malvids; Brassicales; Brassicaceae; Camelineae; Arabidopsis	PER47_ARATH	455	E:3e-159	RecName: Full=Peroxidase 47;^Eukaryota; Viridiplantae; Streptophyta; Embryophyta; Tracheophyta; Spermatophyta; Magnoliophyta; eudicotyledons; Gunneridae; Pentapetalae; rosids; malvids; Brassicales; Brassicaceae; Camelineae; Arabidopsis	PF00141.22	peroxidase	Peroxidase	ENOG410XUVZ	peroxidase	.	ExpAA=17.15^PredHel=1^Topology=i2-24o	.	GO:0042744|hydrogen peroxide catabolic process;GO:0009664|plant-type cell wall organization;GO:0006979|response to oxidative stressGO:0006979|response to oxidative stress;GO:0055114|oxidation-reduction process	GO:0020037|heme binding;GO:0046872|metal ion binding;GO:0004601|peroxidase activityGO:0004601|peroxidase activity;GO:0020037|heme binding	GO:0005576|extracellular region;GO:0009505|plant-type cell wall;GO:0009506|plasmodesma
f2p60_431_37275	0.665273	0.00100116	up	no	-0.197216	0.314185	down	no	-0.126241	0.523525	down	no	-1.16195	5.57855e-08	down	yes	-0.950157	5.41314e-06	down	no	.	.	gi|566156585|ref|XM_002302126.2|	689	E:0	Populus trichocarpa peroxidase precursor family protein (POPTR_0002s06590g) mRNA, complete cds	gi|224066611|ref|XP_002302162.1|	64.3	E:4e-10	peroxidase precursor family protein [Populus trichocarpa]	.	.	.	.	.	.	.	.	.	.	.	.	.	.	.	.	.	.	.
f2p39_1327_8327	-0.94507	6.8385e-61	down	no	-0.224405	1.13573e-05	down	no	-0.518635	8.96752e-14	down	no	-0.488565	NA	down	no	-1.16975	2.40869e-30	down	yes	Gene.5148::PuPacbio_f2p39_1327_transcript8327_g1::g.5148::m.5148	103-1107[+]	gi|566181122|ref|XM_002310238.2|	2257	E:0	Populus trichocarpa Peroxidase 49 precursor family protein (POPTR_0007s13420g) mRNA, complete cds	gi|591403368|gb|AHL39156.1|	613	E:0	class III peroxidase [Populus trichocarpa]	PER72_ARATH	516	E:0	RecName: Full=Peroxidase 72;^Eukaryota; Viridiplantae; Streptophyta; Embryophyta; Tracheophyta; Spermatophyta; Magnoliophyta; eudicotyledons; Gunneridae; Pentapetalae; rosids; malvids; Brassicales; Brassicaceae; Camelineae; Arabidopsis	PER72_ARATH	546	E:0	RecName: Full=Peroxidase 72;^Eukaryota; Viridiplantae; Streptophyta; Embryophyta; Tracheophyta; Spermatophyta; Magnoliophyta; eudicotyledons; Gunneridae; Pentapetalae; rosids; malvids; Brassicales; Brassicaceae; Camelineae; Arabidopsis	PF00141.22	peroxidase	Peroxidase	ENOG410YA1B	peroxidase	.	ExpAA=19.97^PredHel=1^Topology=i5-24o	.	GO:0042744|hydrogen peroxide catabolic process;GO:0009809|lignin biosynthetic process;GO:0006979|response to oxidative stressGO:0006979|response to oxidative stress;GO:0055114|oxidation-reduction process	GO:0020037|heme binding;GO:0046872|metal ion binding;GO:0004601|peroxidase activityGO:0004601|peroxidase activity;GO:0020037|heme binding	GO:0005576|extracellular region
f3p60_345_38217	-1.02374	1.8946e-16	down	yes	-0.483721	2.20903e-06	down	no	-0.597365	1.28443e-07	down	no	-0.107584	0.493733	down	no	-0.308906	0.0649738	down	no	Gene.16693::PuPacbio_f3p60_345_transcript38217_g2::g.16693::m.16693	44-343[-]	gi|566164380|ref|XM_002304873.2|	573	E:1e-160	Populus trichocarpa Peroxidase 42 precursor family protein (POPTR_0004s01510g) mRNA, complete cds	gi|224076226|ref|XP_002304909.1|	147	E:6e-41	Peroxidase 42 precursor family protein [Populus trichocarpa]	PER42_ARATH	124	E:1e-33	RecName: Full=Peroxidase 42;^Eukaryota; Viridiplantae; Streptophyta; Embryophyta; Tracheophyta; Spermatophyta; Magnoliophyta; eudicotyledons; Gunneridae; Pentapetalae; rosids; malvids; Brassicales; Brassicaceae; Camelineae; Arabidopsis	.	.	.	.	.	.	.	.	.	.	.	.	.	.	.
f2p60_1347_26489	-1.02249	7.97649e-137	down	yes	-0.690857	1.21313e-68	down	no	-0.337284	7.56647e-11	down	no	0.108249	NA	up	no	-0.200141	NA	down	no	Gene.13299::PuPacbio_f2p60_1347_transcript26489_g4::g.13299::m.13299	36-1031[+]	gi|566164380|ref|XM_002304873.2|	2196	E:0	Populus trichocarpa Peroxidase 42 precursor family protein (POPTR_0004s01510g) mRNA, complete cds	gi|224076226|ref|XP_002304909.1|	621	E:0	Peroxidase 42 precursor family protein [Populus trichocarpa]	PER42_ARATH	536	E:0	RecName: Full=Peroxidase 42;^Eukaryota; Viridiplantae; Streptophyta; Embryophyta; Tracheophyta; Spermatophyta; Magnoliophyta; eudicotyledons; Gunneridae; Pentapetalae; rosids; malvids; Brassicales; Brassicaceae; Camelineae; Arabidopsis	PER42_ARATH	567	E:0	RecName: Full=Peroxidase 42;^Eukaryota; Viridiplantae; Streptophyta; Embryophyta; Tracheophyta; Spermatophyta; Magnoliophyta; eudicotyledons; Gunneridae; Pentapetalae; rosids; malvids; Brassicales; Brassicaceae; Camelineae; Arabidopsis	PF00141.22	peroxidase	Peroxidase	ENOG4111GTW	peroxidase	.	.	.	GO:0042744|hydrogen peroxide catabolic process;GO:0009664|plant-type cell wall organization;GO:0006979|response to oxidative stress;GO:0048511|rhythmic processGO:0006979|response to oxidative stress;GO:0055114|oxidation-reduction process	GO:0020037|heme binding;GO:0046872|metal ion binding;GO:0004601|peroxidase activityGO:0004601|peroxidase activity;GO:0020037|heme binding	GO:0005576|extracellular region;GO:0009505|plant-type cell wall;GO:0009506|plasmodesma
f2p60_1193_9381	-1.42887	3.73582e-45	down	yes	-1.81803	2.93452e-88	down	yes	-0.49589	2.80069e-08	down	no	-0.778351	0.0130787	down	no	-0.987343	5.46352e-23	down	no	Gene.5612::PuPacbio_f2p60_1193_transcript9381_g2::g.5612::m.5612	84-1058[+]	gi|566179250|ref|XM_002309796.2|	2065	E:0	Populus trichocarpa peroxidase precursor family protein (POPTR_0007s02580g) mRNA, complete cds	gi|591403356|gb|AHL39150.1|	595	E:0	class III peroxidase [Populus trichocarpa]	PER3_ARATH	463	E:2e-161	RecName: Full=Peroxidase 3;^Eukaryota; Viridiplantae; Streptophyta; Embryophyta; Tracheophyta; Spermatophyta; Magnoliophyta; eudicotyledons; Gunneridae; Pentapetalae; rosids; malvids; Brassicales; Brassicaceae; Camelineae; Arabidopsis	PER3_ARATH	465	E:4e-163	RecName: Full=Peroxidase 3;^Eukaryota; Viridiplantae; Streptophyta; Embryophyta; Tracheophyta; Spermatophyta; Magnoliophyta; eudicotyledons; Gunneridae; Pentapetalae; rosids; malvids; Brassicales; Brassicaceae; Camelineae; Arabidopsis	PF00141.22	peroxidase	Peroxidase	ENOG410Y9ME	peroxidase	.	.	.	GO:0042744|hydrogen peroxide catabolic process;GO:0042538|hyperosmotic salinity response;GO:0009664|plant-type cell wall organization;GO:0009409|response to cold;GO:0009269|response to desiccation;GO:0006979|response to oxidative stressGO:0006979|response to oxidative stress;GO:0055114|oxidation-reduction process	GO:0020037|heme binding;GO:0046872|metal ion binding;GO:0004601|peroxidase activityGO:0004601|peroxidase activity;GO:0020037|heme binding	GO:0005783|endoplasmic reticulum;GO:0005576|extracellular region;GO:0009505|plant-type cell wall;GO:0009506|plasmodesma
f2p41_1289_8520	-1.54614	3.41224e-06	down	yes	-1.57311	4.32287e-07	down	yes	-1.10229	0.000133371	down	yes	0.408374	0.0809159	up	no	-1.2135	2.63999e-05	down	yes	Gene.5240::PuPacbio_f2p41_1289_transcript8520_g1::g.5240::m.5240	72-1037[+]	gi|743811496|ref|XM_011020729.1|	2036	E:0	PREDICTED: Populus euphratica peroxidase 2-like (LOC105121876), mRNA	gi|591403344|gb|AHL39144.1|	580	E:0	class III peroxidase [Populus trichocarpa]	PER1_ARAHY	345	E:2e-114	RecName: Full=Cationic peroxidase 1;^Eukaryota; Viridiplantae; Streptophyta; Embryophyta; Tracheophyta; Spermatophyta; Magnoliophyta; eudicotyledons; Gunneridae; Pentapetalae; rosids; fabids; Fabales; Fabaceae; Papilionoideae; Dalbergieae; Arachis	PER1_ARAHY	379	E:2e-129	RecName: Full=Cationic peroxidase 1;^Eukaryota; Viridiplantae; Streptophyta; Embryophyta; Tracheophyta; Spermatophyta; Magnoliophyta; eudicotyledons; Gunneridae; Pentapetalae; rosids; fabids; Fabales; Fabaceae; Papilionoideae; Dalbergieae; Arachis	PF00141.22	peroxidase	Peroxidase	.	.	.	ExpAA=18.10^PredHel=1^Topology=i2-24o	.	GO:0042744|hydrogen peroxide catabolic process;GO:0006979|response to oxidative stressGO:0006979|response to oxidative stress;GO:0055114|oxidation-reduction process	GO:0020037|heme binding;GO:0046872|metal ion binding;GO:0004601|peroxidase activityGO:0004601|peroxidase activity;GO:0020037|heme binding	GO:0005576|extracellular region
f5p60_1200_9306	-0.71744	3.59595e-16	down	no	-1.00234	8.21739e-32	down	yes	-0.717889	5.65292e-16	down	no	-0.374736	0.00130824	down	no	-0.910006	2.49442e-22	down	no	Gene.5576::PuPacbio_f5p60_1200_transcript9306_g2::g.5576::m.5576	1-1059[+]	gi|591403377|gb|KJ201822.1|	1851	E:0	Populus trichocarpa class III peroxidase (PRX57) mRNA, complete cds	gi|591403378|gb|AHL39161.1|	668	E:0	class III peroxidase [Populus trichocarpa]	PER10_ARATH	430	E:1e-147	RecName: Full=Peroxidase 10;^Eukaryota; Viridiplantae; Streptophyta; Embryophyta; Tracheophyta; Spermatophyta; Magnoliophyta; eudicotyledons; Gunneridae; Pentapetalae; rosids; malvids; Brassicales; Brassicaceae; Camelineae; Arabidopsis	PER10_ARATH	441	E:8e-153	RecName: Full=Peroxidase 10;^Eukaryota; Viridiplantae; Streptophyta; Embryophyta; Tracheophyta; Spermatophyta; Magnoliophyta; eudicotyledons; Gunneridae; Pentapetalae; rosids; malvids; Brassicales; Brassicaceae; Camelineae; Arabidopsis	PF00141.22	peroxidase	Peroxidase	ENOG41118P7	peroxidase	.	ExpAA=21.40^PredHel=1^Topology=i20-42o	.	GO:0042744|hydrogen peroxide catabolic process;GO:0006979|response to oxidative stressGO:0006979|response to oxidative stress;GO:0055114|oxidation-reduction process	GO:0020037|heme binding;GO:0046872|metal ion binding;GO:0004601|peroxidase activityGO:0004601|peroxidase activity;GO:0020037|heme binding	GO:0005576|extracellular region
f3p60_1276_8658	0.261969	5.7109e-06	up	no	0.36408	1.82631e-11	up	no	-1.09677	1.03563e-55	down	yes	-0.671107	NA	down	no	-1.13604	3.40611e-35	down	yes	Gene.5316::PuPacbio_f3p60_1276_transcript8658_g1::g.5316::m.5316	2-1015[+]	gi|743926998|ref|XM_011009370.1|	2095	E:0	PREDICTED: Populus euphratica peroxidase 10-like (LOC105113267), mRNA	gi|566171273|ref|XP_002306459.2|	592	E:0	peroxidase family protein [Populus trichocarpa]	PER10_ARATH	387	E:2e-130	RecName: Full=Peroxidase 10;^Eukaryota; Viridiplantae; Streptophyta; Embryophyta; Tracheophyta; Spermatophyta; Magnoliophyta; eudicotyledons; Gunneridae; Pentapetalae; rosids; malvids; Brassicales; Brassicaceae; Camelineae; Arabidopsis	PER10_ARATH	405	E:4e-139	RecName: Full=Peroxidase 10;^Eukaryota; Viridiplantae; Streptophyta; Embryophyta; Tracheophyta; Spermatophyta; Magnoliophyta; eudicotyledons; Gunneridae; Pentapetalae; rosids; malvids; Brassicales; Brassicaceae; Camelineae; Arabidopsis	PF00141.22	peroxidase	Peroxidase	ENOG41118P7	peroxidase	.	.	.	GO:0042744|hydrogen peroxide catabolic process;GO:0006979|response to oxidative stressGO:0006979|response to oxidative stress;GO:0055114|oxidation-reduction process	GO:0020037|heme binding;GO:0046872|metal ion binding;GO:0004601|peroxidase activityGO:0004601|peroxidase activity;GO:0020037|heme binding	GO:0005576|extracellular region
f2p60_1223_9181	-1.08861	3.47529e-28	down	yes	-1.45148	3.05176e-48	down	yes	-0.232781	0.0122661	down	no	-0.238236	0.42436	down	no	-0.137226	0.366209	down	no	Gene.5521::PuPacbio_f2p60_1223_transcript9181_g2::g.5521::m.5521	3-1058[+]	gi|566166642|ref|XM_006384388.1|	2146	E:0	Populus trichocarpa hypothetical protein (POPTR_0004s15200g) mRNA, complete cds	gi|566166643|ref|XP_006384450.1|	600	E:0	hypothetical protein POPTR_0004s15200g [Populus trichocarpa]	PER10_ARATH	402	E:7e-137	RecName: Full=Peroxidase 10;^Eukaryota; Viridiplantae; Streptophyta; Embryophyta; Tracheophyta; Spermatophyta; Magnoliophyta; eudicotyledons; Gunneridae; Pentapetalae; rosids; malvids; Brassicales; Brassicaceae; Camelineae; Arabidopsis	PER10_ARATH	451	E:1e-156	RecName: Full=Peroxidase 10;^Eukaryota; Viridiplantae; Streptophyta; Embryophyta; Tracheophyta; Spermatophyta; Magnoliophyta; eudicotyledons; Gunneridae; Pentapetalae; rosids; malvids; Brassicales; Brassicaceae; Camelineae; Arabidopsis	PF00141.22	peroxidase	Peroxidase	ENOG41118P7	peroxidase	.	ExpAA=21.25^PredHel=1^Topology=i20-42o	.	GO:0042744|hydrogen peroxide catabolic process;GO:0006979|response to oxidative stressGO:0006979|response to oxidative stress;GO:0055114|oxidation-reduction process	GO:0020037|heme binding;GO:0046872|metal ion binding;GO:0004601|peroxidase activityGO:0004601|peroxidase activity;GO:0020037|heme binding	GO:0005576|extracellular region
f2p13_1685_6026	1.00028	0.00053413	up	yes	0.503881	0.0977245	up	no	0.084167	0.789924	up	no	-0.0883589	0.7592	down	no	-0.518152	0.0777574	down	no	.	.	gi|743926998|ref|XM_011009370.1|	1055	E:0	PREDICTED: Populus euphratica peroxidase 10-like (LOC105113267), mRNA	gi|566171273|ref|XP_002306459.2|	215	E:6e-113	peroxidase family protein [Populus trichocarpa]	PER10_ARATH	134	E:1e-65	RecName: Full=Peroxidase 10;^Eukaryota; Viridiplantae; Streptophyta; Embryophyta; Tracheophyta; Spermatophyta; Magnoliophyta; eudicotyledons; Gunneridae; Pentapetalae; rosids; malvids; Brassicales; Brassicaceae; Camelineae; Arabidopsis	.	.	.	.	.	.	.	ENOG41118P7	peroxidase	.	.	.	GO:0042744|hydrogen peroxide catabolic process;GO:0006979|response to oxidative stress	GO:0020037|heme binding;GO:0046872|metal ion binding;GO:0004601|peroxidase activity	GO:0005576|extracellular region
f2p60_1243_27436	-1.24413	9.75858e-12	down	yes	0.411604	0.00217002	up	no	-0.386738	0.0141679	down	no	-0.638967	NA	down	no	-1.57007	2.03425e-18	down	yes	Gene.13743::PuPacbio_f2p60_1243_transcript27436_g7::g.13743::m.13743	3-1049[+]	gi|743783853|ref|XM_011022549.1|	2076	E:0	PREDICTED: Populus euphratica peroxidase 11-like (LOC105123077), mRNA	gi|591403376|gb|AHL39160.1|	695	E:0	class III peroxidase [Populus trichocarpa]	PER11_ARATH	489	E:8e-171	RecName: Full=Peroxidase 11;^Eukaryota; Viridiplantae; Streptophyta; Embryophyta; Tracheophyta; Spermatophyta; Magnoliophyta; eudicotyledons; Gunneridae; Pentapetalae; rosids; malvids; Brassicales; Brassicaceae; Camelineae; Arabidopsis	PER11_ARATH	489	E:7e-172	RecName: Full=Peroxidase 11;^Eukaryota; Viridiplantae; Streptophyta; Embryophyta; Tracheophyta; Spermatophyta; Magnoliophyta; eudicotyledons; Gunneridae; Pentapetalae; rosids; malvids; Brassicales; Brassicaceae; Camelineae; Arabidopsis	PF00141.22	peroxidase	Peroxidase	ENOG410YA9R	peroxidase	.	.	.	GO:0042744|hydrogen peroxide catabolic process;GO:0006979|response to oxidative stress;GO:0048511|rhythmic processGO:0006979|response to oxidative stress;GO:0055114|oxidation-reduction process	GO:0020037|heme binding;GO:0046872|metal ion binding;GO:0004601|peroxidase activityGO:0004601|peroxidase activity;GO:0020037|heme binding	GO:0005576|extracellular region
f2p60_1221_27650	-0.90215	6.17978e-14	down	no	0.317949	0.000797804	up	no	0.166407	0.148726	up	no	-0.239547	NA	down	no	-1.08145	1.15622e-17	down	yes	Gene.13828::PuPacbio_f2p60_1221_transcript27650_g4::g.13828::m.13828	1-1068[+]	gi|743797809|ref|XM_011010770.1|	2039	E:0	PREDICTED: Populus euphratica peroxidase 11 (LOC105114266), mRNA	gi|566190808|ref|XP_002315983.2|	698	E:0	Peroxidase 11 precursor family protein [Populus trichocarpa]	PER11_ARATH	486	E:5e-170	RecName: Full=Peroxidase 11;^Eukaryota; Viridiplantae; Streptophyta; Embryophyta; Tracheophyta; Spermatophyta; Magnoliophyta; eudicotyledons; Gunneridae; Pentapetalae; rosids; malvids; Brassicales; Brassicaceae; Camelineae; Arabidopsis	PER11_ARATH	486	E:6e-171	RecName: Full=Peroxidase 11;^Eukaryota; Viridiplantae; Streptophyta; Embryophyta; Tracheophyta; Spermatophyta; Magnoliophyta; eudicotyledons; Gunneridae; Pentapetalae; rosids; malvids; Brassicales; Brassicaceae; Camelineae; Arabidopsis	PF00141.22	peroxidase	Peroxidase	ENOG410YA9R	peroxidase	.	.	.	GO:0042744|hydrogen peroxide catabolic process;GO:0006979|response to oxidative stress;GO:0048511|rhythmic processGO:0006979|response to oxidative stress;GO:0055114|oxidation-reduction process	GO:0020037|heme binding;GO:0046872|metal ion binding;GO:0004601|peroxidase activityGO:0004601|peroxidase activity;GO:0020037|heme binding	GO:0005576|extracellular region
f2p60_1233_9008	0.201168	0.0286067	up	no	1.5346	3.3493e-97	up	yes	1.30121	6.73478e-51	up	yes	1.45142	1.31317e-15	up	yes	0.0712577	0.487407	up	no	Gene.5461::PuPacbio_f2p60_1233_transcript9008_g2::g.5461::m.5461	1-1077[+]	gi|566163959|ref|XM_002304848.2|	2191	E:0	Populus trichocarpa hypothetical protein (POPTR_0003s21610g) mRNA, complete cds	gi|743837024|ref|XP_011025398.1|	714	E:0	PREDICTED: uncharacterized protein LOC105126277 [Populus euphratica]	PER15_IPOBA	405	E:2e-138	RecName: Full=Peroxidase 15 {ECO:0000303|PubMed:17936696};^Eukaryota; Viridiplantae; Streptophyta; Embryophyta; Tracheophyta; Spermatophyta; Magnoliophyta; eudicotyledons; Gunneridae; Pentapetalae; asterids; lamiids; Solanales; Convolvulaceae; Ipomoeeae; Ipomoea	PER15_IPOBA	407	E:1e-139	RecName: Full=Peroxidase 15 {ECO:0000303|PubMed:17936696};^Eukaryota; Viridiplantae; Streptophyta; Embryophyta; Tracheophyta; Spermatophyta; Magnoliophyta; eudicotyledons; Gunneridae; Pentapetalae; asterids; lamiids; Solanales; Convolvulaceae; Ipomoeeae; Ipomoea	PF00141.22	peroxidase	Peroxidase	.	.	.	ExpAA=20.31^PredHel=1^Topology=i21-38o	.	GO:0042744|hydrogen peroxide catabolic process;GO:0006979|response to oxidative stressGO:0006979|response to oxidative stress;GO:0055114|oxidation-reduction process	GO:0020037|heme binding;GO:0046872|metal ion binding;GO:0004601|peroxidase activityGO:0004601|peroxidase activity;GO:0020037|heme binding	GO:0005576|extracellular region
f2p60_1215_27764	-0.419022	0.000318193	down	no	-0.845332	6.23886e-13	down	no	-1.0203	7.19566e-10	down	yes	-0.954924	9.05124e-12	down	no	-0.798459	7.40908e-11	down	no	.	.	gi|566147253|ref|XM_002299108.2|	1958	E:0	Populus trichocarpa hypothetical protein (POPTR_0001s04850g) mRNA, complete cds	gi|743886830|ref|XP_011037955.1|	346	E:2e-123	PREDICTED: peroxidase A2-like [Populus euphratica]	PER1A_ARMRU	207	E:7e-103	RecName: Full=Peroxidase C1A;^Eukaryota; Viridiplantae; Streptophyta; Embryophyta; Tracheophyta; Spermatophyta; Magnoliophyta; eudicotyledons; Gunneridae; Pentapetalae; rosids; malvids; Brassicales; Brassicaceae; Cardamineae; Armoracia	.	.	.	.	.	.	.	.	.	.	.	.	GO:0042744|hydrogen peroxide catabolic process;GO:0006979|response to oxidative stress	GO:0020037|heme binding;GO:0046872|metal ion binding;GO:0004601|peroxidase activity	GO:0005576|extracellular region;GO:0005773|vacuole
f21p60_1261_27184	0.117573	0.0315195	up	no	0.914462	4.01078e-77	up	no	1.80042	1.49782e-218	up	yes	1.22815	1.8085e-94	up	yes	0.805508	8.07809e-37	up	no	Gene.13615::PuPacbio_f21p60_1261_transcript27184_g1::g.13615::m.13615	42-353[+]	gi|566176090|ref|XM_006381414.1|	2067	E:0	Populus trichocarpa Peroxidase 21 precursor family protein (POPTR_0006s13190g) mRNA, complete cds	gi|566176091|ref|XP_006381476.1|	479	E:0	Peroxidase 21 precursor family protein [Populus trichocarpa]	PER21_ARATH	372	E:2e-132	RecName: Full=Peroxidase 21;^Eukaryota; Viridiplantae; Streptophyta; Embryophyta; Tracheophyta; Spermatophyta; Magnoliophyta; eudicotyledons; Gunneridae; Pentapetalae; rosids; malvids; Brassicales; Brassicaceae; Camelineae; Arabidopsis	PER21_ARATH	125	E:3e-34	RecName: Full=Peroxidase 21;^Eukaryota; Viridiplantae; Streptophyta; Embryophyta; Tracheophyta; Spermatophyta; Magnoliophyta; eudicotyledons; Gunneridae; Pentapetalae; rosids; malvids; Brassicales; Brassicaceae; Camelineae; Arabidopsis	PF00141.22	peroxidase	Peroxidase	ENOG410YHIH	peroxidase	.	.	.	GO:0050832|defense response to fungus;GO:0042744|hydrogen peroxide catabolic process;GO:0009664|plant-type cell wall organization;GO:0006979|response to oxidative stress;GO:0048511|rhythmic processGO:0006979|response to oxidative stress;GO:0055114|oxidation-reduction process	GO:0020037|heme binding;GO:0046872|metal ion binding;GO:0004601|peroxidase activityGO:0004601|peroxidase activity;GO:0020037|heme binding	GO:0005829|cytosol;GO:0009505|plant-type cell wall;GO:0009506|plasmodesma
f2p60_1145_28469	-0.347846	0.263778	down	no	-1.58164	1.73469e-06	down	yes	-0.326844	0.228027	down	no	-0.775215	0.00365778	down	no	-1.26976	5.36033e-06	down	yes	Gene.14186::PuPacbio_f2p60_1145_transcript28469_g4::g.14186::m.14186	35-1000[+]	gi|566174916|ref|XM_002308046.2|	1947	E:0	Populus trichocarpa Peroxidase 25 precursor family protein (POPTR_0006s06890g) mRNA, complete cds	gi|224087140|ref|XP_002308082.1|	656	E:0	Peroxidase 25 precursor family protein [Populus trichocarpa]	PER25_ARATH	493	E:3e-173	RecName: Full=Peroxidase 25;^Eukaryota; Viridiplantae; Streptophyta; Embryophyta; Tracheophyta; Spermatophyta; Magnoliophyta; eudicotyledons; Gunneridae; Pentapetalae; rosids; malvids; Brassicales; Brassicaceae; Camelineae; Arabidopsis	PER25_ARATH	493	E:3e-174	RecName: Full=Peroxidase 25;^Eukaryota; Viridiplantae; Streptophyta; Embryophyta; Tracheophyta; Spermatophyta; Magnoliophyta; eudicotyledons; Gunneridae; Pentapetalae; rosids; malvids; Brassicales; Brassicaceae; Camelineae; Arabidopsis	PF00141.22	peroxidase	Peroxidase	ENOG410YF8G	peroxidase	.	.	.	GO:0042744|hydrogen peroxide catabolic process;GO:0006979|response to oxidative stressGO:0006979|response to oxidative stress;GO:0055114|oxidation-reduction process	GO:0020037|heme binding;GO:0046872|metal ion binding;GO:0004601|peroxidase activityGO:0004601|peroxidase activity;GO:0020037|heme binding	GO:0005576|extracellular region;GO:0009505|plant-type cell wall;GO:0009506|plasmodesma
f2p59_1311_26810	4.25425	0	up	yes	4.4535	0	up	yes	4.01473	9.49279e-272	up	yes	2.27018	1.2777e-24	up	yes	0.704701	9.79429e-05	up	no	Gene.13436::PuPacbio_f2p59_1311_transcript26810_g1::g.13436::m.13436	3-1019[+]	gi|566200106|ref|XM_006375966.1|	2185	E:0	Populus trichocarpa hypothetical protein (POPTR_0013s08130g) mRNA, complete cds	gi|566200107|ref|XP_006376028.1|	632	E:0	hypothetical protein POPTR_0013s08130g [Populus trichocarpa]	PER4_VITVI	483	E:2e-168	RecName: Full=Peroxidase 4 {ECO:0000250|UniProtKB:Q42578};^Eukaryota; Viridiplantae; Streptophyta; Embryophyta; Tracheophyta; Spermatophyta; Magnoliophyta; eudicotyledons; Gunneridae; Pentapetalae; rosids; Vitales; Vitaceae; Vitis	PER4_VITVI	494	E:2e-174	RecName: Full=Peroxidase 4 {ECO:0000250|UniProtKB:Q42578};^Eukaryota; Viridiplantae; Streptophyta; Embryophyta; Tracheophyta; Spermatophyta; Magnoliophyta; eudicotyledons; Gunneridae; Pentapetalae; rosids; Vitales; Vitaceae; Vitis	PF00141.22	peroxidase	Peroxidase	ENOG410YETZ	peroxidase	.	.	.	GO:0042744|hydrogen peroxide catabolic process;GO:0006979|response to oxidative stressGO:0006979|response to oxidative stress;GO:0055114|oxidation-reduction process	GO:0020037|heme binding;GO:0046872|metal ion binding;GO:0004601|peroxidase activityGO:0004601|peroxidase activity;GO:0020037|heme binding	GO:0005576|extracellular region
f2p60_1342_8141	-0.775702	1.40646e-37	down	no	-1.00189	7.34662e-75	down	yes	-0.536321	5.50584e-15	down	no	-0.525435	NA	down	no	-0.505529	NA	down	no	Gene.5070::PuPacbio_f2p60_1342_transcript8141_g2::g.5070::m.5070	55-1041[+]	gi|566215055|ref|XM_002324427.2|	2255	E:0	Populus trichocarpa Peroxidase 16 precursor family protein (POPTR_0018s09710g) mRNA, complete cds	gi|224142233|ref|XP_002324463.1|	626	E:0	Peroxidase 16 precursor family protein [Populus trichocarpa]	PER45_ARATH	491	E:2e-171	RecName: Full=Peroxidase 45;^Eukaryota; Viridiplantae; Streptophyta; Embryophyta; Tracheophyta; Spermatophyta; Magnoliophyta; eudicotyledons; Gunneridae; Pentapetalae; rosids; malvids; Brassicales; Brassicaceae; Camelineae; Arabidopsis	PER45_ARATH	494	E:9e-175	RecName: Full=Peroxidase 45;^Eukaryota; Viridiplantae; Streptophyta; Embryophyta; Tracheophyta; Spermatophyta; Magnoliophyta; eudicotyledons; Gunneridae; Pentapetalae; rosids; malvids; Brassicales; Brassicaceae; Camelineae; Arabidopsis	PF00141.22	peroxidase	Peroxidase	ENOG4111S7R	peroxidase	.	ExpAA=16.29^PredHel=1^Topology=i7-24o	.	GO:0042744|hydrogen peroxide catabolic process;GO:0006979|response to oxidative stressGO:0006979|response to oxidative stress;GO:0055114|oxidation-reduction process	GO:0020037|heme binding;GO:0046872|metal ion binding;GO:0004601|peroxidase activityGO:0004601|peroxidase activity;GO:0020037|heme binding	GO:0005576|extracellular region
f5p60_1266_8983	0.583224	1.1791e-26	up	no	0.232345	1.3094e-05	up	no	-1.06667	2.9023e-58	down	yes	-0.851156	5.25634e-16	down	no	-1.41811	2.44775e-35	down	yes	Gene.5450::PuPacbio_f5p60_1266_transcript8983_g1::g.5450::m.5450	39-1028[+]	gi|566205236|ref|XM_002321913.2|	2137	E:0	Populus trichocarpa hypothetical protein (POPTR_0015s00580g) mRNA, complete cds	gi|591403420|gb|AHL39182.1|	662	E:0	class III peroxidase [Populus trichocarpa]	PER5_VITVI	461	E:1e-159	RecName: Full=Peroxidase 5 {ECO:0000250|UniProtKB:P22195};^Eukaryota; Viridiplantae; Streptophyta; Embryophyta; Tracheophyta; Spermatophyta; Magnoliophyta; eudicotyledons; Gunneridae; Pentapetalae; rosids; Vitales; Vitaceae; Vitis	PER5_VITVI	461	E:2e-161	RecName: Full=Peroxidase 5 {ECO:0000250|UniProtKB:P22195};^Eukaryota; Viridiplantae; Streptophyta; Embryophyta; Tracheophyta; Spermatophyta; Magnoliophyta; eudicotyledons; Gunneridae; Pentapetalae; rosids; Vitales; Vitaceae; Vitis	PF00141.22	peroxidase	Peroxidase	ENOG410YDTD	peroxidase	.	.	.	GO:0042744|hydrogen peroxide catabolic process;GO:0006979|response to oxidative stressGO:0006979|response to oxidative stress;GO:0055114|oxidation-reduction process	GO:0020037|heme binding;GO:0046872|metal ion binding;GO:0004601|peroxidase activityGO:0004601|peroxidase activity;GO:0020037|heme binding	GO:0005576|extracellular region
f4p60_1269_8729	-0.634132	9.74116e-15	down	no	-1.41524	2.78697e-63	down	yes	-0.421164	8.80284e-07	down	no	-2.25528	6.96722e-12	down	yes	-5.20607	1.58501e-194	down	yes	Gene.5349::PuPacbio_f4p60_1269_transcript8729_g1::g.5349::m.5349	2-1042[+]	gi|743900895|ref|XM_011045452.1|	2104	E:0	PREDICTED: Populus euphratica peroxidase 5-like (LOC105139121), mRNA	gi|743900896|ref|XP_011043754.1|	650	E:0	PREDICTED: peroxidase 5-like [Populus euphratica]	PER5_VITVI	444	E:3e-153	RecName: Full=Peroxidase 5 {ECO:0000250|UniProtKB:P22195};^Eukaryota; Viridiplantae; Streptophyta; Embryophyta; Tracheophyta; Spermatophyta; Magnoliophyta; eudicotyledons; Gunneridae; Pentapetalae; rosids; Vitales; Vitaceae; Vitis	PER5_VITVI	447	E:8e-156	RecName: Full=Peroxidase 5 {ECO:0000250|UniProtKB:P22195};^Eukaryota; Viridiplantae; Streptophyta; Embryophyta; Tracheophyta; Spermatophyta; Magnoliophyta; eudicotyledons; Gunneridae; Pentapetalae; rosids; Vitales; Vitaceae; Vitis	PF00141.22	peroxidase	Peroxidase	ENOG410YDTD	peroxidase	.	.	.	GO:0042744|hydrogen peroxide catabolic process;GO:0006979|response to oxidative stressGO:0006979|response to oxidative stress;GO:0055114|oxidation-reduction process	GO:0020037|heme binding;GO:0046872|metal ion binding;GO:0004601|peroxidase activityGO:0004601|peroxidase activity;GO:0020037|heme binding	GO:0005576|extracellular region
f4p60_1347_26468	-0.880984	1.12984e-37	down	no	-0.57732	4.09786e-20	down	no	-1.15464	1.74693e-49	down	yes	-1.27464	4.06025e-23	down	yes	-1.43614	2.45737e-64	down	yes	Gene.13284::PuPacbio_f4p60_1347_transcript26468_g1::g.13284::m.13284	91-1086[+]	gi|566257715|ref|XM_006388516.1|	2270	E:0	Populus trichocarpa This sequence shows homology with Cucumber peroxidase family protein (POPTR_0149s00200g) mRNA, complete cds	gi|566208923|ref|XP_006373791.1|	537	E:0	hypothetical protein POPTR_0016s05860g [Populus trichocarpa]	PER53_ARATH	428	E:2e-146	RecName: Full=Peroxidase 53;^Eukaryota; Viridiplantae; Streptophyta; Embryophyta; Tracheophyta; Spermatophyta; Magnoliophyta; eudicotyledons; Gunneridae; Pentapetalae; rosids; malvids; Brassicales; Brassicaceae; Camelineae; Arabidopsis	PER53_ARATH	497	E:1e-175	RecName: Full=Peroxidase 53;^Eukaryota; Viridiplantae; Streptophyta; Embryophyta; Tracheophyta; Spermatophyta; Magnoliophyta; eudicotyledons; Gunneridae; Pentapetalae; rosids; malvids; Brassicales; Brassicaceae; Camelineae; Arabidopsis	PF00141.22	peroxidase	Peroxidase	ENOG410YBAI	peroxidase	.	.	.	GO:0002215|defense response to nematode;GO:0009908|flower development;GO:0042744|hydrogen peroxide catabolic process;GO:0006979|response to oxidative stressGO:0006979|response to oxidative stress;GO:0055114|oxidation-reduction process	GO:0020037|heme binding;GO:0046872|metal ion binding;GO:0004601|peroxidase activityGO:0004601|peroxidase activity;GO:0020037|heme binding	GO:0005576|extracellular region;GO:0005794|Golgi apparatus
f2p60_1251_9156	-2.03964	8.35742e-209	down	yes	-0.425944	6.07979e-11	down	no	-0.371653	1.10252e-05	down	no	-0.653281	NA	down	no	-1.22063	1.08039e-27	down	yes	Gene.5510::PuPacbio_f2p60_1251_transcript9156_g5::g.5510::m.5510	39-1076[+]	gi|566156001|ref|XM_002300709.2|	2115	E:0	Populus trichocarpa hypothetical protein (POPTR_0002s03260g) mRNA, complete cds	gi|566156002|ref|XP_002300745.2|	600	E:0	hypothetical protein POPTR_0002s03260g [Populus trichocarpa]	PER9_ARATH	487	E:7e-170	RecName: Full=Peroxidase 9;^Eukaryota; Viridiplantae; Streptophyta; Embryophyta; Tracheophyta; Spermatophyta; Magnoliophyta; eudicotyledons; Gunneridae; Pentapetalae; rosids; malvids; Brassicales; Brassicaceae; Camelineae; Arabidopsis	PER9_ARATH	523	E:0	RecName: Full=Peroxidase 9;^Eukaryota; Viridiplantae; Streptophyta; Embryophyta; Tracheophyta; Spermatophyta; Magnoliophyta; eudicotyledons; Gunneridae; Pentapetalae; rosids; malvids; Brassicales; Brassicaceae; Camelineae; Arabidopsis	PF00141.22	peroxidase	Peroxidase	ENOG410YFB5	peroxidase	.	ExpAA=18.53^PredHel=1^Topology=i7-29o	.	GO:0042744|hydrogen peroxide catabolic process;GO:0006979|response to oxidative stressGO:0006979|response to oxidative stress;GO:0055114|oxidation-reduction process	GO:0020037|heme binding;GO:0046872|metal ion binding;GO:0004601|peroxidase activityGO:0004601|peroxidase activity;GO:0020037|heme binding	GO:0005576|extracellular region
f2p60_993_30125	0.114353	0.320124	up	no	1.00899	4.16976e-28	up	yes	0.797042	5.34611e-16	up	no	1.36977	5.81333e-54	up	yes	1.60285	6.46002e-17	up	yes	Gene.14865::PuPacbio_f2p60_993_transcript30125_g9::g.14865::m.14865	80-721[+]	gi|743893392|ref|XM_011041625.1|	1646	E:0	PREDICTED: Populus euphratica peroxiredoxin Q, chloroplastic (LOC105136330), mRNA	gi|566176289|ref|XP_002308370.2|	352	E:5e-119	peroxiredoxin Q family protein [Populus trichocarpa]	PRXQ_POPJC	351	E:5e-120	RecName: Full=Peroxiredoxin Q, chloroplastic;^Eukaryota; Viridiplantae; Streptophyta; Embryophyta; Tracheophyta; Spermatophyta; Magnoliophyta; eudicotyledons; Gunneridae; Pentapetalae; rosids; fabids; Malpighiales; Salicaceae; Saliceae; Populus	PRXQ_POPJC	423	E:2e-150	RecName: Full=Peroxiredoxin Q, chloroplastic;^Eukaryota; Viridiplantae; Streptophyta; Embryophyta; Tracheophyta; Spermatophyta; Magnoliophyta; eudicotyledons; Gunneridae; Pentapetalae; rosids; fabids; Malpighiales; Salicaceae; Saliceae; Populus	PF00578.20	AhpC-TSA	AhpC/TSA family	.	.	.	.	.	GO:0045454|cell redox homeostasisGO:0055114|oxidation-reduction process	GO:0004601|peroxidase activity;GO:0051920|peroxiredoxin activityGO:0016209|antioxidant activity;GO:0016491|oxidoreductase activity	GO:0009534|chloroplast thylakoid
f7p60_1490_25269	-1.01814	3.43338e-124	down	yes	-0.372866	7.50828e-22	down	no	-0.426899	2.76112e-12	down	no	-0.0131072	NA	down	no	-0.246707	NA	down	no	Gene.12717::PuPacbio_f7p60_1490_transcript25269_g2::g.12717::m.12717	38-1033[+]	gi|566164380|ref|XM_002304873.2|	2420	E:0	Populus trichocarpa Peroxidase 42 precursor family protein (POPTR_0004s01510g) mRNA, complete cds	gi|224076226|ref|XP_002304909.1|	623	E:0	Peroxidase 42 precursor family protein [Populus trichocarpa]	PER42_ARATH	537	E:0	RecName: Full=Peroxidase 42;^Eukaryota; Viridiplantae; Streptophyta; Embryophyta; Tracheophyta; Spermatophyta; Magnoliophyta; eudicotyledons; Gunneridae; Pentapetalae; rosids; malvids; Brassicales; Brassicaceae; Camelineae; Arabidopsis	PER42_ARATH	567	E:0	RecName: Full=Peroxidase 42;^Eukaryota; Viridiplantae; Streptophyta; Embryophyta; Tracheophyta; Spermatophyta; Magnoliophyta; eudicotyledons; Gunneridae; Pentapetalae; rosids; malvids; Brassicales; Brassicaceae; Camelineae; Arabidopsis	PF00141.22	peroxidase	Peroxidase	ENOG4111GTW	peroxidase	.	.	.	GO:0042744|hydrogen peroxide catabolic process;GO:0009664|plant-type cell wall organization;GO:0006979|response to oxidative stress;GO:0048511|rhythmic processGO:0006979|response to oxidative stress;GO:0055114|oxidation-reduction process	GO:0020037|heme binding;GO:0046872|metal ion binding;GO:0004601|peroxidase activityGO:0004601|peroxidase activity;GO:0020037|heme binding	GO:0005576|extracellular region;GO:0009505|plant-type cell wall;GO:0009506|plasmodesma
f2p60_1016_29886	-1.05467	1.86392e-67	down	yes	-0.78599	1.53198e-48	down	no	-0.489177	2.59739e-16	down	no	-0.117905	0.0435247	down	no	-0.044967	0.502857	down	no	Gene.14776::PuPacbio_f2p60_1016_transcript29886_g4::g.14776::m.14776	2-697[+]	gi|566200295|ref|XM_002319296.2|	1753	E:0	Populus trichocarpa hypothetical protein (POPTR_0013s09270g) mRNA, complete cds	gi|224124440|ref|XP_002319332.1|	460	E:3e-161	hypothetical protein POPTR_0013s09270g [Populus trichocarpa]	SODM_HEVBR	390	E:8e-135	RecName: Full=Superoxide dismutase [Mn], mitochondrial;^Eukaryota; Viridiplantae; Streptophyta; Embryophyta; Tracheophyta; Spermatophyta; Magnoliophyta; eudicotyledons; Gunneridae; Pentapetalae; rosids; fabids; Malpighiales; Euphorbiaceae; Crotonoideae; Micrandreae; Hevea	SODM_HEVBR	390	E:1e-136	RecName: Full=Superoxide dismutase [Mn], mitochondrial;^Eukaryota; Viridiplantae; Streptophyta; Embryophyta; Tracheophyta; Spermatophyta; Magnoliophyta; eudicotyledons; Gunneridae; Pentapetalae; rosids; fabids; Malpighiales; Euphorbiaceae; Crotonoideae; Micrandreae; Hevea	PF00081.21	Sod_Fe_N	Iron/manganese superoxide dismutases, alpha-hairpin domain	.	.	.	.	.	GO:0006801|superoxide metabolic process;GO:0055114|oxidation-reduction process	GO:0046872|metal ion binding;GO:0004784|superoxide dismutase activityGO:0004784|superoxide dismutase activity;GO:0046872|metal ion binding	GO:0005759|mitochondrial matrix
f2p28_837_12827	-0.00108713	0.994502	down	no	0.189296	0.23414	up	no	0.555239	0.000138928	up	no	0.102201	0.633831	up	no	1.04167	2.45356e-10	up	yes	Gene.6880::PuPacbio_f2p28_837_transcript12827_g1::g.6880::m.6880	1-522[+]	gi|566169464|ref|XM_006382641.1|	1219	E:0	Populus trichocarpa hypothetical protein (POPTR_0005s04590g) mRNA, complete cds	gi|566169463|ref|XP_006382702.1|	296	E:1e-98	Cu/Zn superoxide dismutase family protein [Populus trichocarpa]	SODC_IPOBA	281	E:5e-94	RecName: Full=Superoxide dismutase [Cu-Zn];^Eukaryota; Viridiplantae; Streptophyta; Embryophyta; Tracheophyta; Spermatophyta; Magnoliophyta; eudicotyledons; Gunneridae; Pentapetalae; asterids; lamiids; Solanales; Convolvulaceae; Ipomoeeae; Ipomoea	SODC_IPOBA	281	E:6e-96	RecName: Full=Superoxide dismutase [Cu-Zn];^Eukaryota; Viridiplantae; Streptophyta; Embryophyta; Tracheophyta; Spermatophyta; Magnoliophyta; eudicotyledons; Gunneridae; Pentapetalae; asterids; lamiids; Solanales; Convolvulaceae; Ipomoeeae; Ipomoea	PF00080.19	Sod_Cu	Copper/zinc superoxide dismutase (SODC)	.	.	.	.	.	GO:0006801|superoxide metabolic process;GO:0055114|oxidation-reduction process	GO:0046872|metal ion binding;GO:0004784|superoxide dismutase activityGO:0046872|metal ion binding	GO:0005737|cytoplasm
[truncated: 2 more columns]
