# Supplementary material for: Characterization of the Gene Expression Profile Response to Drought Stress in Populus ussuriensis Using PacBio SMRT and Illumina Sequencing
Source: Int J Mol Sci. 2022 Mar 30;23(7):3840. doi: 10.3390/ijms23073840 (PMC8998571; doi:10.3390/ijms23073840)
Supplement: Supplementary file 1 [file ijms-23-03840-s001.zip › Table S9.xls]

## Sheet: Sheet1
Table S9 DEGs related to ion transport in Populus ussuriensis
geneID	6h Log2FoldChange	pval	Up/Down	Significant	12h Log2FoldChange	pval	Up/Down	Significant	24h Log2FoldChange	pval	Up/Down	Significant	48h Log2FoldChange	pval	Up/Down	Significant	120h Log2FoldChange	pval	Up/Down	Significant	Prot_ID	Prot_Coords	NT_TopHit	NT_Score	NT_Evalue	NT_Description	NR_TopHit	NR_Score	NR_Evalue	NR_Description	BLASTX_Sprot_TopHit	BLASTX_Score	BLASTX_Evalue	BLASTX_Description	BLASTP_Sprot_TopHit	BLASTP_Score	BLASTP_Evalue	BLASTP_Description	PFAM_TopHit	PFAM_Name	PFAM_Description	eggNOG_TopHit	eggNOG_Description	SignalP	TmHMM	RNAMMER	GO_biological_process	GO_molecular_function	GO_cellular_component
f2p37_2396_20662	0.37571	0.10625	up	no	1.28828	2.83432e-13	up	yes	0.852838	5.61767e-06	up	no	1.14583	1.57083e-08	up	yes	1.38871	2.27688e-15	up	yes	Gene.9942::PuPacbio_f2p37_2396_transcript20662_g1::g.9942::m.9942	2-2206[+]	gi|566212951|ref|XM_006373283.1|	4322	E:0	Populus trichocarpa hypothetical protein (POPTR_0017s12550g) mRNA, complete cds	gi|566212952|ref|XP_006373345.1|	1334	E:0	hypothetical protein POPTR_0017s12550g [Populus trichocarpa]	CNGC2_ARATH	999	E:0	RecName: Full=Cyclic nucleotide-gated ion channel 2;^Eukaryota; Viridiplantae; Streptophyta; Embryophyta; Tracheophyta; Spermatophyta; Magnoliophyta; eudicotyledons; Gunneridae; Pentapetalae; rosids; malvids; Brassicales; Brassicaceae; Camelineae; Arabidopsis	CNGC2_ARATH	1077	E:0	RecName: Full=Cyclic nucleotide-gated ion channel 2;^Eukaryota; Viridiplantae; Streptophyta; Embryophyta; Tracheophyta; Spermatophyta; Magnoliophyta; eudicotyledons; Gunneridae; Pentapetalae; rosids; malvids; Brassicales; Brassicaceae; Camelineae; Arabidopsis	PF00520.30	Ion_trans	Ion transport protein	ENOG410XPSE	Potassium voltage-gated channel, subfamily H (Eag-related), member	.	ExpAA=139.53^PredHel=4^Topology=o269-291i298-320o402-424i445-467o	.	GO:0070509|calcium ion import;GO:0006952|defense response;GO:0007263|nitric oxide mediated signal transduction;GO:0009626|plant-type hypersensitive response;GO:0042391|regulation of membrane potentialGO:0006811|ion transport;GO:0055085|transmembrane transport	GO:0005262|calcium channel activity;GO:0005516|calmodulin binding;GO:0030552|cAMP binding;GO:0030553|cGMP binding;GO:0005222|intracellular cAMP activated cation channel activity;GO:0005221|intracellular cyclic nucleotide activated cation channel activity;GO:0005242|inward rectifier potassium channel activityGO:0005216|ion channel activity	GO:0005887|integral component of plasma membrane;GO:0005622|intracellularGO:0016020|membrane
f2p60_2781_19668	-1.72879	6.35027e-89	down	yes	-2.49915	1.66482e-237	down	yes	-0.971615	1.20769e-28	down	no	-0.466164	2.70154e-06	down	no	0.203837	0.0265423	up	no	Gene.9270::PuPacbio_f2p60_2781_transcript19668_g3::g.9270::m.9270	22-2490[+]	gi|743920583|ref|XM_011006041.1|	4362	E:0	PREDICTED: Populus euphratica potassium transporter 5-like (LOC105110861), mRNA	gi|743920584|ref|XP_011004343.1|	1504	E:0	PREDICTED: potassium transporter 5-like [Populus euphratica]	POT5_ARATH	969	E:0	RecName: Full=Potassium transporter 5;^Eukaryota; Viridiplantae; Streptophyta; Embryophyta; Tracheophyta; Spermatophyta; Magnoliophyta; eudicotyledons; Gunneridae; Pentapetalae; rosids; malvids; Brassicales; Brassicaceae; Camelineae; Arabidopsis	POT5_ARATH	1027	E:0	RecName: Full=Potassium transporter 5;^Eukaryota; Viridiplantae; Streptophyta; Embryophyta; Tracheophyta; Spermatophyta; Magnoliophyta; eudicotyledons; Gunneridae; Pentapetalae; rosids; malvids; Brassicales; Brassicaceae; Camelineae; Arabidopsis	PF02705.15	K_trans	K+ potassium transporter	COG3158	Transport of potassium into the cell (By similarity)	.	ExpAA=253.26^PredHel=11^Topology=i65-87o102-124i189-211o255-277i303-321o336-358i379-401o426-445i457-479o484-506i511-533o	.	GO:0010107|potassium ion importGO:0071805|potassium ion transmembrane transport	GO:0015079|potassium ion transmembrane transporter activity;GO:0009674|potassium:sodium symporter activityGO:0015079|potassium ion transmembrane transporter activity	GO:0016021|integral component of membrane;GO:0016020|membrane;GO:0005886|plasma membraneGO:0016020|membrane
f7p60_2856_19557	1.51687	6.31973e-107	up	yes	1.028	8.09372e-55	up	yes	0.727302	5.67923e-20	up	no	0.468322	8.96309e-09	up	no	0.60095	3.91928e-15	up	no	Gene.9177::PuPacbio_f7p60_2856_transcript19557_g1::g.9177::m.9177	275-2653[+]	gi|566200102|ref|XM_006375964.1|	4985	E:0	Populus trichocarpa Potassium transporter 2 family protein (POPTR_0013s08110g) mRNA, complete cds	gi|566200103|ref|XP_006376026.1|	1489	E:0	Potassium transporter 2 family protein [Populus trichocarpa]	POT2_ARATH	1223	E:0	RecName: Full=Potassium transporter 2;^Eukaryota; Viridiplantae; Streptophyta; Embryophyta; Tracheophyta; Spermatophyta; Magnoliophyta; eudicotyledons; Gunneridae; Pentapetalae; rosids; malvids; Brassicales; Brassicaceae; Camelineae; Arabidopsis	POT2_ARATH	1313	E:0	RecName: Full=Potassium transporter 2;^Eukaryota; Viridiplantae; Streptophyta; Embryophyta; Tracheophyta; Spermatophyta; Magnoliophyta; eudicotyledons; Gunneridae; Pentapetalae; rosids; malvids; Brassicales; Brassicaceae; Camelineae; Arabidopsis	PF02705.15	K_trans	K+ potassium transporter	COG3158	Transport of potassium into the cell (By similarity)	.	ExpAA=276.78^PredHel=11^Topology=i20-42o62-84i145-167o217-239i264-286o296-318i339-361o385-407i420-442o446-468i475-497o	.	GO:0071805|potassium ion transmembrane transport	GO:0015079|potassium ion transmembrane transporter activityGO:0015079|potassium ion transmembrane transporter activity	GO:0016021|integral component of membrane;GO:0005886|plasma membraneGO:0016020|membrane
f3p60_1980_22126	1.25418	4.96948e-05	up	yes	2.31906	3.10994e-21	up	yes	1.84926	2.70657e-13	up	yes	1.69524	3.92001e-09	up	yes	1.68454	2.92981e-10	up	yes	Gene.10938::PuPacbio_f3p60_1980_transcript22126_g1::g.10938::m.10938	82-1824[+]	gi|566199729|ref|XM_002319155.2|	3369	E:0	Populus trichocarpa hypothetical protein (POPTR_0013s06200g) mRNA, complete cds	gi|566199730|ref|XP_002319191.2|	874	E:0	hypothetical protein POPTR_0013s06200g [Populus trichocarpa]	CCX1_ARATH	419	E:2e-136	RecName: Full=Cation/calcium exchanger 1;^Eukaryota; Viridiplantae; Streptophyta; Embryophyta; Tracheophyta; Spermatophyta; Magnoliophyta; eudicotyledons; Gunneridae; Pentapetalae; rosids; malvids; Brassicales; Brassicaceae; Camelineae; Arabidopsis	CCX1_ARATH	596	E:0	RecName: Full=Cation/calcium exchanger 1;^Eukaryota; Viridiplantae; Streptophyta; Embryophyta; Tracheophyta; Spermatophyta; Magnoliophyta; eudicotyledons; Gunneridae; Pentapetalae; rosids; malvids; Brassicales; Brassicaceae; Camelineae; Arabidopsis	PF01699.23	Na_Ca_ex	Sodium/calcium exchanger protein	COG0530	exchanger	.	ExpAA=272.29^PredHel=13^Topology=i13-32o102-124i137-159o174-196i208-230o235-257i345-364o379-398i410-429o439-461i483-505o520-539i551-573o	.	GO:0006813|potassium ion transport;GO:0006814|sodium ion transportGO:0055085|transmembrane transport	GO:0015297|antiporter activity	GO:0016021|integral component of membrane;GO:0005774|vacuolar membraneGO:0016021|integral component of membrane
f4p60_1851_22830	-2.81593	2.75215e-57	down	yes	-0.918525	1.85398e-12	down	no	-0.0201035	0.855028	down	no	-0.0689235	NA	down	no	0.093619	0.68135	up	no	Gene.11372::PuPacbio_f4p60_1851_transcript22830_g2::g.11372::m.11372	3-1433[+]	gi|566175491|ref|XM_002309102.2|	3260	E:0	Populus trichocarpa Ca2+/H+ exchanger family protein (POPTR_0006s10080g) mRNA, complete cds	gi|566175492|ref|XP_002309138.2|	811	E:0	Ca2+/H+ exchanger family protein [Populus trichocarpa]	CAX3_ARATH	552	E:0	RecName: Full=Vacuolar cation/proton exchanger 3;^Eukaryota; Viridiplantae; Streptophyta; Embryophyta; Tracheophyta; Spermatophyta; Magnoliophyta; eudicotyledons; Gunneridae; Pentapetalae; rosids; malvids; Brassicales; Brassicaceae; Camelineae; Arabidopsis	CAX3_ARATH	590	E:0	RecName: Full=Vacuolar cation/proton exchanger 3;^Eukaryota; Viridiplantae; Streptophyta; Embryophyta; Tracheophyta; Spermatophyta; Magnoliophyta; eudicotyledons; Gunneridae; Pentapetalae; rosids; malvids; Brassicales; Brassicaceae; Camelineae; Arabidopsis	PF01699.23	Na_Ca_ex	Sodium/calcium exchanger protein	COG0387	Calcium Proton	.	ExpAA=219.36^PredHel=10^Topology=i99-121o149-171i183-205o220-242i255-277o308-330i337-356o376-398i405-426o436-453i	.	GO:0006874|cellular calcium ion homeostasis;GO:0030026|cellular manganese ion homeostasis;GO:0006882|cellular zinc ion homeostasis;GO:0055062|phosphate ion homeostasis;GO:0006793|phosphorus metabolic process;GO:0051592|response to calcium ion;GO:0009624|response to nematodeGO:0055085|transmembrane transport	GO:0015369|calcium:proton antiporter activity	GO:0016021|integral component of membrane;GO:0009705|plant-type vacuole membrane;GO:0005774|vacuolar membrane;GO:0005773|vacuoleGO:0016021|integral component of membrane
f2p55_3201_1361	-2.99819	2.42804e-43	down	yes	-1.58488	1.4397e-21	down	yes	-2.36284	9.57889e-36	down	yes	-1.77519	1.84373e-25	down	yes	-0.737158	0.00816779	down	no	Gene.1256::PuPacbio_f2p55_3201_transcript1361_g1::g.1256::m.1256	113-3040[+]	gi|743862465|ref|XM_011033097.1|	5103	E:0	PREDICTED: Populus euphratica glutamate receptor 2.8-like (LOC105130542), mRNA	gi|743862466|ref|XP_011031399.1|	1711	E:0	PREDICTED: glutamate receptor 2.8-like [Populus euphratica]	GLR27_ARATH	865	E:0	RecName: Full=Glutamate receptor 2.7;^Eukaryota; Viridiplantae; Streptophyta; Embryophyta; Tracheophyta; Spermatophyta; Magnoliophyta; eudicotyledons; Gunneridae; Pentapetalae; rosids; malvids; Brassicales; Brassicaceae; Camelineae; Arabidopsis	GLR28_ARATH	972	E:0	RecName: Full=Glutamate receptor 2.8;^Eukaryota; Viridiplantae; Streptophyta; Embryophyta; Tracheophyta; Spermatophyta; Magnoliophyta; eudicotyledons; Gunneridae; Pentapetalae; rosids; malvids; Brassicales; Brassicaceae; Camelineae; Arabidopsis	PF13458.5	Peripla_BP_6	Periplasmic binding protein	ENOG410XQQV	glutamate receptor	.	ExpAA=89.60^PredHel=4^Topology=i7-29o594-616i653-675o839-861i	.	GO:0006816|calcium ion transport;GO:0019722|calcium-mediated signaling;GO:0071230|cellular response to amino acid stimulus	GO:0005262|calcium channel activity;GO:0008066|glutamate receptor activity;GO:0004970|ionotropic glutamate receptor activityGO:0004970|ionotropic glutamate receptor activity;GO:0005234|extracellular-glutamate-gated ion channel activity	GO:0016021|integral component of membrane;GO:0005622|intracellular;GO:0005886|plasma membraneGO:0016020|membrane
f2p60_3228_18926	0.333321	0.26851	up	no	0.913337	0.000283362	up	no	0.772146	0.00238673	up	no	1.2144	1.83479e-07	up	yes	1.41454	2.99552e-09	up	yes	Gene.8774::PuPacbio_f2p60_3228_transcript18926_g1::g.8774::m.8774	164-2977[+]	gi|224081500|ref|XM_002306400.1|	5437	E:0	Populus trichocarpa glutamate receptor family protein (POPTR_0005s10570g) mRNA, complete cds	gi|224081501|ref|XP_002306436.1|	1808	E:0	glutamate receptor family protein [Populus trichocarpa]	GLR36_ARATH	1153	E:0	RecName: Full=Glutamate receptor 3.6;^Eukaryota; Viridiplantae; Streptophyta; Embryophyta; Tracheophyta; Spermatophyta; Magnoliophyta; eudicotyledons; Gunneridae; Pentapetalae; rosids; malvids; Brassicales; Brassicaceae; Camelineae; Arabidopsis	GLR36_ARATH	1211	E:0	RecName: Full=Glutamate receptor 3.6;^Eukaryota; Viridiplantae; Streptophyta; Embryophyta; Tracheophyta; Spermatophyta; Magnoliophyta; eudicotyledons; Gunneridae; Pentapetalae; rosids; malvids; Brassicales; Brassicaceae; Camelineae; Arabidopsis	PF13458.5	Peripla_BP_6	Periplasmic binding protein	ENOG410XQQV	glutamate receptor	.	ExpAA=92.48^PredHel=3^Topology=o595-612i651-673o835-854i	.	GO:0006816|calcium ion transport;GO:0019722|calcium-mediated signaling;GO:0071230|cellular response to amino acid stimulus;GO:0009864|induced systemic resistance, jasmonic acid mediated signaling pathway;GO:0009611|response to wounding	GO:0005262|calcium channel activity;GO:0008066|glutamate receptor activity;GO:0004970|ionotropic glutamate receptor activityGO:0004970|ionotropic glutamate receptor activity	GO:0016021|integral component of membrane;GO:0005622|intracellular;GO:0005886|plasma membraneGO:0016020|membrane
f2p9_3515_18575	-0.655545	0.26851	down	no	-0.951929	3.17913e-100	down	no	-1.0939	2.2577e-76	down	yes	-0.582704	1.14959e-18	down	no	-0.104229	0.207607	down	no	Gene.8486::PuPacbio_f2p9_3515_transcript18575_g1::g.8486::m.8486	235-1692[+]	gi|743901247|ref|XM_011045638.1|	5888	E:0	PREDICTED: Populus euphratica plasma membrane ATPase 4 (LOC105139263), mRNA	gi|224143678|ref|XP_002325038.1|	877	E:0	plasma membrane H+ ATPase family protein [Populus trichocarpa]	PMA4_NICPL	820	E:0	RecName: Full=Plasma membrane ATPase 4;^Eukaryota; Viridiplantae; Streptophyta; Embryophyta; Tracheophyta; Spermatophyta; Magnoliophyta; eudicotyledons; Gunneridae; Pentapetalae; asterids; lamiids; Solanales; Solanaceae; Nicotianoideae; Nicotianeae; Nicotiana	PMA4_NICPL	852	E:0	RecName: Full=Plasma membrane ATPase 4;^Eukaryota; Viridiplantae; Streptophyta; Embryophyta; Tracheophyta; Spermatophyta; Magnoliophyta; eudicotyledons; Gunneridae; Pentapetalae; asterids; lamiids; Solanales; Solanaceae; Nicotianoideae; Nicotianeae; Nicotiana	PF00690.25	Cation_ATPase_N	Cation transporter/ATPase, N-terminus	.	.	.	ExpAA=81.86^PredHel=2^Topology=o245-267i280-302o	.	GO:0006754|ATP biosynthetic process	GO:0005524|ATP binding;GO:0008553|hydrogen-exporting ATPase activity, phosphorylative mechanism;GO:0046872|metal ion binding	GO:0016021|integral component of membrane;GO:0005886|plasma membrane
f2p9_3608_18466	-0.959916	9.08607e-40	down	no	-1.54148	2.95051e-140	down	yes	-0.930222	1.62205e-43	down	no	-0.704542	2.87369e-14	down	no	-0.549077	1.3022e-10	down	no	Gene.8374::PuPacbio_f2p9_3608_transcript18466_g1::g.8374::m.8374	275-1918[+]	gi|743850328|ref|XM_011030401.1|	6091	E:0	PREDICTED: Populus euphratica ATPase 11, plasma membrane-type-like (LOC105128640), transcript variant X1, mRNA	gi|224135653|ref|XP_002322127.1|	1011	E:0	putative plasma membrane H+ ATPase family protein [Populus trichocarpa]	PMA11_ARATH	974	E:0	RecName: Full=ATPase 11, plasma membrane-type;^Eukaryota; Viridiplantae; Streptophyta; Embryophyta; Tracheophyta; Spermatophyta; Magnoliophyta; eudicotyledons; Gunneridae; Pentapetalae; rosids; malvids; Brassicales; Brassicaceae; Camelineae; Arabidopsis	PMA11_ARATH	997	E:0	RecName: Full=ATPase 11, plasma membrane-type;^Eukaryota; Viridiplantae; Streptophyta; Embryophyta; Tracheophyta; Spermatophyta; Magnoliophyta; eudicotyledons; Gunneridae; Pentapetalae; rosids; malvids; Brassicales; Brassicaceae; Camelineae; Arabidopsis	PF00690.25	Cation_ATPase_N	Cation transporter/ATPase, N-terminus	COG0474	P-type atpase	.	ExpAA=90.23^PredHel=4^Topology=i65-87o97-116i244-266o281-303i	.	GO:0006754|ATP biosynthetic process	GO:0005524|ATP binding;GO:0008553|hydrogen-exporting ATPase activity, phosphorylative mechanism;GO:0046872|metal ion binding	GO:0016021|integral component of membrane;GO:0016020|membrane;GO:0005886|plasma membrane
f3p60_597_35488	1.17838	0.00079292	up	yes	0.263241	0.425248	up	no	0.557156	0.0819698	up	no	-0.329036	0.199439	down	no	0.153379	0.504696	up	no	.	.	gi|566178707|ref|XM_006382102.1|	874	E:0	Populus trichocarpa H+-ATPase family protein (POPTR_0006s28990g) mRNA, complete cds	gi|743862321|ref|XP_011031360.1|	171	E:4e-46	PREDICTED: plasma membrane ATPase 4-like [Populus euphratica]	PMA4_NICPL	151	E:2e-40	RecName: Full=Plasma membrane ATPase 4;^Eukaryota; Viridiplantae; Streptophyta; Embryophyta; Tracheophyta; Spermatophyta; Magnoliophyta; eudicotyledons; Gunneridae; Pentapetalae; asterids; lamiids; Solanales; Solanaceae; Nicotianoideae; Nicotianeae; Nicotiana	.	.	.	.	.	.	.	.	.	.	.	.	GO:0006754|ATP biosynthetic process	GO:0005524|ATP binding;GO:0008553|hydrogen-exporting ATPase activity, phosphorylative mechanism;GO:0046872|metal ion binding	GO:0016021|integral component of membrane;GO:0005886|plasma membrane
f2p57_4009_433	2.29238	7.13167e-140	up	yes	1.24325	2.87142e-44	up	yes	0.639769	1.18911e-09	up	no	0.553236	5.41356e-08	up	no	0.492756	1.45616e-06	up	no	Gene.505::PuPacbio_f2p57_4009_transcript433_g1::g.505::m.505	344-3631[+]	gi|743805705|ref|XM_011019402.1|	6708	E:0	PREDICTED: Populus euphratica calcium-transporting ATPase 10, plasma membrane-type-like (LOC105120955), transcript variant X1, mRNA	gi|743805708|ref|XP_011017705.1|	2083	E:0	PREDICTED: calcium-transporting ATPase 10, plasma membrane-type-like isoform X2 [Populus euphratica]	ACA10_ARATH	1570	E:0	RecName: Full=Calcium-transporting ATPase 10, plasma membrane-type;^Eukaryota; Viridiplantae; Streptophyta; Embryophyta; Tracheophyta; Spermatophyta; Magnoliophyta; eudicotyledons; Gunneridae; Pentapetalae; rosids; malvids; Brassicales; Brassicaceae; Camelineae; Arabidopsis	ACA10_ARATH	1617	E:0	RecName: Full=Calcium-transporting ATPase 10, plasma membrane-type;^Eukaryota; Viridiplantae; Streptophyta; Embryophyta; Tracheophyta; Spermatophyta; Magnoliophyta; eudicotyledons; Gunneridae; Pentapetalae; rosids; malvids; Brassicales; Brassicaceae; Camelineae; Arabidopsis	PF12515.7	CaATP_NAI	Ca2+-ATPase N terminal autoinhibitory domain	ENOG410XNNC	ATPase, Ca transporting, plasma membrane	.	ExpAA=149.79^PredHel=6^Topology=o194-216i229-246o378-400i433-455o1002-1024i1037-1059o	.	.	GO:0005524|ATP binding;GO:0005388|calcium-transporting ATPase activity;GO:0005516|calmodulin binding;GO:0046872|metal ion bindingGO:0005516|calmodulin binding	GO:0005887|integral component of plasma membrane;GO:0043231|intracellular membrane-bounded organelle;GO:0005886|plasma membrane;GO:0009506|plasmodesma
f2p20_3494_18605	0.934374	2.8404e-15	up	no	0.734069	4.11217e-10	up	no	-0.258436	0.0680963	down	no	-0.431791	0.0602657	down	no	-1.29547	9.14924e-08	down	yes	Gene.8519::PuPacbio_f2p20_3494_transcript18605_g1::g.8519::m.8519	196-3252[+]	gi|549445022|gb|KC344828.1|	6028	E:0	Populus tomentosa ACA13 gene, complete cds	gi|743786277|ref|XP_011027295.1|	1874	E:0	PREDICTED: putative calcium-transporting ATPase 13, plasma membrane-type [Populus euphratica]	ACA13_ARATH	1347	E:0	RecName: Full=Putative calcium-transporting ATPase 13, plasma membrane-type;^Eukaryota; Viridiplantae; Streptophyta; Embryophyta; Tracheophyta; Spermatophyta; Magnoliophyta; eudicotyledons; Gunneridae; Pentapetalae; rosids; malvids; Brassicales; Brassicaceae; Camelineae; Arabidopsis	ACA13_ARATH	1399	E:0	RecName: Full=Putative calcium-transporting ATPase 13, plasma membrane-type;^Eukaryota; Viridiplantae; Streptophyta; Embryophyta; Tracheophyta; Spermatophyta; Magnoliophyta; eudicotyledons; Gunneridae; Pentapetalae; rosids; malvids; Brassicales; Brassicaceae; Camelineae; Arabidopsis	PF00690.25	Cation_ATPase_N	Cation transporter/ATPase, N-terminus	ENOG410XNNC	ATPase, Ca transporting, plasma membrane	.	ExpAA=172.98^PredHel=8^Topology=i143-165o180-202i338-360o388-410i808-830o835-857i949-966o981-1000i	.	.	GO:0005524|ATP binding;GO:0005388|calcium-transporting ATPase activity;GO:0005516|calmodulin binding;GO:0046872|metal ion binding	GO:0005887|integral component of plasma membrane;GO:0043231|intracellular membrane-bounded organelle
f2p60_2293_3245	1.54446	2.88609e-211	up	yes	0.598944	4.99445e-33	up	no	0.0616346	0.334838	up	no	-0.178721	0.00337193	down	no	-0.221897	0.00134285	down	no	Gene.2553::PuPacbio_f2p60_2293_transcript3245_g1::g.2553::m.2553	223-1176[+]	gi|743912704|ref|XM_011001939.1|	3537	E:0	PREDICTED: Populus euphratica uncharacterized LOC105107868 (LOC105107868), mRNA	gi|566153478|ref|XP_002298903.2|	506	E:0	sodium/calcium exchanger family protein [Populus trichocarpa]	NCL_ARATH	309	E:6e-175	RecName: Full=Sodium/calcium exchanger NCL {ECO:0000305};^Eukaryota; Viridiplantae; Streptophyta; Embryophyta; Tracheophyta; Spermatophyta; Magnoliophyta; eudicotyledons; Gunneridae; Pentapetalae; rosids; malvids; Brassicales; Brassicaceae; Camelineae; Arabidopsis	NCL_ARATH	375	E:2e-124	RecName: Full=Sodium/calcium exchanger NCL {ECO:0000305};^Eukaryota; Viridiplantae; Streptophyta; Embryophyta; Tracheophyta; Spermatophyta; Magnoliophyta; eudicotyledons; Gunneridae; Pentapetalae; rosids; malvids; Brassicales; Brassicaceae; Camelineae; Arabidopsis	PF01699.23	Na_Ca_ex	Sodium/calcium exchanger protein	ENOG410ZVKW	Calcium-binding EF hand family protein	.	ExpAA=132.22^PredHel=6^Topology=i12-29o83-105i118-140o155-177i214-233o243-265i	.	GO:0055074|calcium ion homeostasis;GO:0071472|cellular response to salt stressGO:0055085|transmembrane transport	GO:0005509|calcium ion binding;GO:0005432|calcium:sodium antiporter activity	GO:0016021|integral component of membrane;GO:0016020|membrane;GO:0000325|plant-type vacuole;GO:0005886|plasma membrane;GO:0009506|plasmodesma;GO:0005774|vacuolar membrane;GO:0005773|vacuoleGO:0016021|integral component of membrane
[truncated: 2 more columns]
