# Supplementary material for: Characterization of the Gene Expression Profile Response to Drought Stress in Populus ussuriensis Using PacBio SMRT and Illumina Sequencing
Source: Int J Mol Sci. 2022 Mar 30;23(7):3840. doi: 10.3390/ijms23073840 (PMC8998571; doi:10.3390/ijms23073840)
Supplement: Supplementary file 1 [file ijms-23-03840-s001.zip › Table S10.xls]

## Sheet: Sheet1
Table S10 DEGs encoding drought stress proteins in Populus ussuriensis
geneID	6h Log2FoldChange	pval	Up/Down	Significant	12h Log2FoldChange	pval	Up/Down	Significant	24h Log2FoldChange	pval	Up/Down	Significant	48h Log2FoldChange	pval	Up/Down	Significant	120h Log2FoldChange	pval	Up/Down	Significant	Prot_ID	Prot_Coords	NT_TopHit	NT_Score	NT_Evalue	NT_Description	NR_TopHit	NR_Score	NR_Evalue	NR_Description	BLASTX_Sprot_TopHit	BLASTX_Score	BLASTX_Evalue	BLASTX_Description	BLASTP_Sprot_TopHit	BLASTP_Score	BLASTP_Evalue	BLASTP_Description	PFAM_TopHit	PFAM_Name	PFAM_Description	eggNOG_TopHit	eggNOG_Description	SignalP	TmHMM	RNAMMER	GO_biological_process	GO_molecular_function	GO_cellular_component
f3p60_787_32671	2.87902	7.05113e-52	up	yes	3.23923	2.50515e-90	up	yes	1.60688	1.66151e-13	up	yes	1.13656	0.00047442	up	yes	0.349944	0.144732	up	no	Gene.15866::f3p60_787_transcript32671_g6::g.15866::m.15866	106-564[+]	gi|566240365|ref|XM_002325943.2|	1275	E:0	Populus trichocarpa 17.5 kd heat shock family protein (POPTR_0019s11050g) mRNA, complete cds	gi|566240366|ref|XP_002325979.2|	251	E:2e-81	17.5 kd heat shock family protein [Populus trichocarpa]	HSP11_SOYBN	209	E:3e-66	RecName: Full=17.3 kDa class I heat shock protein;^Eukaryota; Viridiplantae; Streptophyta; Embryophyta; Tracheophyta; Spermatophyta; Magnoliophyta; eudicotyledons; Gunneridae; Pentapetalae; rosids; fabids; Fabales; Fabaceae; Papilionoideae; Phaseoleae; Glycine; Soja	HSP11_SOYBN	259	E:1e-87	RecName: Full=17.3 kDa class I heat shock protein;^Eukaryota; Viridiplantae; Streptophyta; Embryophyta; Tracheophyta; Spermatophyta; Magnoliophyta; eudicotyledons; Gunneridae; Pentapetalae; rosids; fabids; Fabales; Fabaceae; Papilionoideae; Phaseoleae; Glycine; Soja	PF04969.15	CS	CS domain	COG0071	response to heat	.	.	.	.	.	GO:0005737|cytoplasm
f2p60_805_32419	1.02425	3.14761e-34	up	yes	0.362675	2.82835e-05	up	no	0.285985	0.00286173	up	no	0.0243115	0.876581	up	no	-0.0999091	0.518472	down	no	Gene.15779::f2p60_805_transcript32419_g7::g.15779::m.15779	93-563[+]	gi|566186252|ref|XM_002313374.2|	1315	E:0	Populus trichocarpa hypothetical protein (POPTR_0009s04410g) mRNA, complete cds	gi|224104357|ref|XP_002313410.1|	276	E:4e-91	hypothetical protein POPTR_0009s04410g [Populus trichocarpa]	HSP11_SOYBN	232	E:6e-75	RecName: Full=17.3 kDa class I heat shock protein;^Eukaryota; Viridiplantae; Streptophyta; Embryophyta; Tracheophyta; Spermatophyta; Magnoliophyta; eudicotyledons; Gunneridae; Pentapetalae; rosids; fabids; Fabales; Fabaceae; Papilionoideae; Phaseoleae; Glycine; Soja	HSP14_SOYBN	263	E:5e-89	RecName: Full=17.5 kDa class I heat shock protein;^Eukaryota; Viridiplantae; Streptophyta; Embryophyta; Tracheophyta; Spermatophyta; Magnoliophyta; eudicotyledons; Gunneridae; Pentapetalae; rosids; fabids; Fabales; Fabaceae; Papilionoideae; Phaseoleae; Glycine; Soja	PF04969.15	CS	CS domain	COG0071	response to heat	.	.	.	.	.	GO:0005737|cytoplasm
f2p60_797_32529	2.25829	5.08814e-21	up	yes	2.4135	8.14606e-28	up	yes	0.831657	0.00188969	up	no	0.942695	0.0039816	up	no	0.550965	0.0333055	up	no	Gene.15819::f2p60_797_transcript32529_g9::g.15819::m.15819	109-576[+]	gi|566191442|ref|XM_002316124.2|	1330	E:0	Populus trichocarpa 17.5 kd heat shock family protein (POPTR_0010s18260g) mRNA, complete cds	gi|224112349|ref|XP_002316160.1|	223	E:2e-70	17.5 kd heat shock family protein [Populus trichocarpa]	HSP11_SOYBN	110	E:4e-28	RecName: Full=17.3 kDa class I heat shock protein;^Eukaryota; Viridiplantae; Streptophyta; Embryophyta; Tracheophyta; Spermatophyta; Magnoliophyta; eudicotyledons; Gunneridae; Pentapetalae; rosids; fabids; Fabales; Fabaceae; Papilionoideae; Phaseoleae; Glycine; Soja	HS17C_ARATH	145	E:1e-42	RecName: Full=17.6 kDa class I heat shock protein 3;^Eukaryota; Viridiplantae; Streptophyta; Embryophyta; Tracheophyta; Spermatophyta; Magnoliophyta; eudicotyledons; Gunneridae; Pentapetalae; rosids; malvids; Brassicales; Brassicaceae; Camelineae; Arabidopsis	PF00011.20	HSP20	Hsp20/alpha crystallin family	COG0071	response to heat	.	.	.	.	.	GO:0005737|cytoplasm
f2p60_322_385861	1.58982	0.00123898	up	yes	0.99097	0.047316	up	no	0.402522	0.306038	up	no	0.128313	0.680374	up	no	-0.244226	0.398515	down	no	.	.	gi|566177848|ref|XM_002308501.2|	488	E:5e-135	Populus trichocarpa heat shock protein 17.7 (POPTR_0006s24030g) mRNA, complete cds	.	.	.	.	.	.	.	.	.	.	.	.	.	.	.	.	.	.	.	.	.	.	.
f4p60_842_31916	2.12168	1.50143e-110	up	yes	2.43427	4.55702e-180	up	yes	0.958658	3.31776e-15	up	no	0.336642	NA	up	no	-0.607798	4.39497e-05	down	no	Gene.15589::f4p60_842_transcript31916_g2::g.15589::m.15589	3-536[+]	gi|118482685|gb|EF145067.1|	1323	E:0	Populus trichocarpa clone WS0111_O07 unknown mRNA	gi|743812897|ref|XP_011019383.1|	254	E:4e-82	PREDICTED: 17.9 kDa class II heat shock protein-like [Populus euphratica]	HSP21_SOYBN	211	E:1e-66	RecName: Full=17.9 kDa class II heat shock protein;^Eukaryota; Viridiplantae; Streptophyta; Embryophyta; Tracheophyta; Spermatophyta; Magnoliophyta; eudicotyledons; Gunneridae; Pentapetalae; rosids; fabids; Fabales; Fabaceae; Papilionoideae; Phaseoleae; Glycine; Soja	HSP21_SOYBN	248	E:8e-83	RecName: Full=17.9 kDa class II heat shock protein;^Eukaryota; Viridiplantae; Streptophyta; Embryophyta; Tracheophyta; Spermatophyta; Magnoliophyta; eudicotyledons; Gunneridae; Pentapetalae; rosids; fabids; Fabales; Fabaceae; Papilionoideae; Phaseoleae; Glycine; Soja	PF00011.20	HSP20	Hsp20/alpha crystallin family	COG0071	response to heat	.	.	.	.	.	GO:0005737|cytoplasm
f3p60_805_32408	2.50885	6.2906e-69	up	yes	2.56302	2.90601e-85	up	yes	1.26467	3.79466e-14	up	yes	1.0808	5.18376e-05	up	yes	0.204494	0.31994	up	no	Gene.15777::f3p60_805_transcript32408_g5::g.15777::m.15777	1-591[+]	gi|566182640|ref|XM_002312096.2|	1184	E:0	Populus trichocarpa 18.2 kDa class I heat shock family protein (POPTR_0008s06260g) mRNA, complete cds	gi|224101075|ref|XP_002312132.1|	252	E:2e-81	18.2 kDa class I heat shock family protein [Populus trichocarpa]	HSP12_MEDSA	205	E:2e-64	RecName: Full=18.2 kDa class I heat shock protein;^Eukaryota; Viridiplantae; Streptophyta; Embryophyta; Tracheophyta; Spermatophyta; Magnoliophyta; eudicotyledons; Gunneridae; Pentapetalae; rosids; fabids; Fabales; Fabaceae; Papilionoideae; Trifolieae; Medicago	HSP12_MEDSA	262	E:7e-88	RecName: Full=18.2 kDa class I heat shock protein;^Eukaryota; Viridiplantae; Streptophyta; Embryophyta; Tracheophyta; Spermatophyta; Magnoliophyta; eudicotyledons; Gunneridae; Pentapetalae; rosids; fabids; Fabales; Fabaceae; Papilionoideae; Trifolieae; Medicago	PF04969.15	CS	CS domain	.	.	.	.	.	.	.	GO:0005737|cytoplasm
f2p60_864_31641	1.06229	4.2541e-46	up	yes	0.430941	2.31955e-08	up	no	0.317107	0.000937592	up	no	0.0531935	0.612686	up	no	-0.0577159	0.676628	down	no	Gene.15469::f2p60_864_transcript31641_g6::g.15469::m.15469	95-565[+]	gi|566186252|ref|XM_002313374.2|	1399	E:0	Populus trichocarpa hypothetical protein (POPTR_0009s04410g) mRNA, complete cds	gi|224104357|ref|XP_002313410.1|	291	E:2e-96	hypothetical protein POPTR_0009s04410g [Populus trichocarpa]	HSP14_SOYBN	254	E:1e-83	RecName: Full=17.5 kDa class I heat shock protein;^Eukaryota; Viridiplantae; Streptophyta; Embryophyta; Tracheophyta; Spermatophyta; Magnoliophyta; eudicotyledons; Gunneridae; Pentapetalae; rosids; fabids; Fabales; Fabaceae; Papilionoideae; Phaseoleae; Glycine; Soja	HSP12_MEDSA	263	E:7e-89	RecName: Full=18.2 kDa class I heat shock protein;^Eukaryota; Viridiplantae; Streptophyta; Embryophyta; Tracheophyta; Spermatophyta; Magnoliophyta; eudicotyledons; Gunneridae; Pentapetalae; rosids; fabids; Fabales; Fabaceae; Papilionoideae; Trifolieae; Medicago	PF04969.15	CS	CS domain	.	.	.	.	.	.	.	GO:0005737|cytoplasm
f2p60_708_13864	1.87335	1.09734e-05	up	yes	2.40954	8.27827e-11	up	yes	1.48117	3.17963e-05	up	yes	0.849893	0.011095	up	no	0.266318	0.423464	up	no	Gene.7192::f2p60_708_transcript13864_g4::g.7192::m.7192	84-413[+]	gi|566175390|ref|XM_002308156.2|	1186	E:0	Populus trichocarpa 18.2 kDa class I heat shock family protein (POPTR_0006s09460g) mRNA, complete cds	gi|743812113|ref|XP_011019192.1|	170	E:5e-58	PREDICTED: class I heat shock protein-like [Populus euphratica]	HS16B_ORYSJ	112	E:3e-38	RecName: Full=16.9 kDa class I heat shock protein 2;^Eukaryota; Viridiplantae; Streptophyta; Embryophyta; Tracheophyta; Spermatophyta; Magnoliophyta; Liliopsida; Poales; Poaceae; BOP clade; Oryzoideae; Oryzeae; Oryzinae; Oryza	HSP12_MEDSA	137	E:3e-40	RecName: Full=18.2 kDa class I heat shock protein;^Eukaryota; Viridiplantae; Streptophyta; Embryophyta; Tracheophyta; Spermatophyta; Magnoliophyta; eudicotyledons; Gunneridae; Pentapetalae; rosids; fabids; Fabales; Fabaceae; Papilionoideae; Trifolieae; Medicago	PF00011.20	HSP20	Hsp20/alpha crystallin family	.	.	.	.	.	.	.	GO:0005737|cytoplasm
f3p60_829_13603	1.13632	1.31196e-20	up	yes	1.33186	6.53766e-37	up	yes	0.531123	4.68786e-05	up	no	0.69178	0.00102111	up	no	0.136057	0.39135	up	no	Gene.7122::f3p60_829_transcript13603_g3::g.7122::m.7122	172-639[+]	gi|566186427|ref|XM_002313324.2|	1256	E:0	Populus trichocarpa 17.5 kd heat shock family protein (POPTR_0009s05440g) mRNA, complete cds	gi|224104214|ref|XP_002313360.1|	193	E:2e-58	17.5 kd heat shock family protein [Populus trichocarpa]	HSP11_MEDSA	164	E:8e-49	RecName: Full=18.1 kDa class I heat shock protein;^Eukaryota; Viridiplantae; Streptophyta; Embryophyta; Tracheophyta; Spermatophyta; Magnoliophyta; eudicotyledons; Gunneridae; Pentapetalae; rosids; fabids; Fabales; Fabaceae; Papilionoideae; Trifolieae; Medicago	HSP16_SOYBN	245	E:5e-82	RecName: Full=18.5 kDa class I heat shock protein;^Eukaryota; Viridiplantae; Streptophyta; Embryophyta; Tracheophyta; Spermatophyta; Magnoliophyta; eudicotyledons; Gunneridae; Pentapetalae; rosids; fabids; Fabales; Fabaceae; Papilionoideae; Phaseoleae; Glycine; Soja	PF04969.15	CS	CS domain	COG0071	response to heat	.	.	.	.	.	GO:0005737|cytoplasm
f3p60_839_12609	2.58336	7.20945e-44	up	yes	3.24388	4.98064e-98	up	yes	1.54282	9.7834e-13	up	yes	1.45403	NA	up	no	0.852032	0.000175219	up	no	Gene.6820::f3p60_839_transcript12609_g3::g.6820::m.6820	141-629[+]	gi|566182640|ref|XM_002312096.2|	1266	E:0	Populus trichocarpa 18.2 kDa class I heat shock family protein (POPTR_0008s06260g) mRNA, complete cds	gi|224101075|ref|XP_002312132.1|	263	E:2e-85	18.2 kDa class I heat shock family protein [Populus trichocarpa]	HSP16_SOYBN	211	E:1e-66	RecName: Full=18.5 kDa class I heat shock protein;^Eukaryota; Viridiplantae; Streptophyta; Embryophyta; Tracheophyta; Spermatophyta; Magnoliophyta; eudicotyledons; Gunneridae; Pentapetalae; rosids; fabids; Fabales; Fabaceae; Papilionoideae; Phaseoleae; Glycine; Soja	HSP16_SOYBN	263	E:5e-89	RecName: Full=18.5 kDa class I heat shock protein;^Eukaryota; Viridiplantae; Streptophyta; Embryophyta; Tracheophyta; Spermatophyta; Magnoliophyta; eudicotyledons; Gunneridae; Pentapetalae; rosids; fabids; Fabales; Fabaceae; Papilionoideae; Phaseoleae; Glycine; Soja	PF04969.15	CS	CS domain	COG0071	response to heat	.	.	.	.	.	GO:0005737|cytoplasm
f3p60_885_12148	2.81716	2.84197e-26	up	yes	3.08474	6.11323e-37	up	yes	1.03048	0.000762447	up	yes	0.696847	0.0380177	up	no	-0.176702	0.59536	down	no	Gene.6673::f3p60_885_transcript12148_g1::g.6673::m.6673	92-670[+]	gi|566200352|ref|XM_002319848.2|	1526	E:0	Populus trichocarpa hypothetical protein (POPTR_0013s09600g) mRNA, complete cds	gi|743938350|ref|XP_011013596.1|	358	E:4e-122	PREDICTED: 22.0 kDa class IV heat shock protein-like [Populus euphratica]	HSP41_SOYBN	241	E:1e-77	RecName: Full=22.0 kDa class IV heat shock protein;^Eukaryota; Viridiplantae; Streptophyta; Embryophyta; Tracheophyta; Spermatophyta; Magnoliophyta; eudicotyledons; Gunneridae; Pentapetalae; rosids; fabids; Fabales; Fabaceae; Papilionoideae; Phaseoleae; Glycine; Soja	HSP41_PEA	244	E:3e-80	RecName: Full=22.7 kDa class IV heat shock protein;^Eukaryota; Viridiplantae; Streptophyta; Embryophyta; Tracheophyta; Spermatophyta; Magnoliophyta; eudicotyledons; Gunneridae; Pentapetalae; rosids; fabids; Fabales; Fabaceae; Papilionoideae; Fabeae; Pisum	PF04969.15	CS	CS domain	.	.	.	ExpAA=21.04^PredHel=1^Topology=i5-27o	.	.	.	GO:0005788|endoplasmic reticulum lumen
f2p35_1062_29414	1.28103	0.00752508	up	yes	1.95109	2.75935e-06	up	yes	-0.0658682	0.866254	down	no	0.219905	0.476884	up	no	-0.326243	0.27882	down	no	Gene.14580::f2p35_1062_transcript29414_g1::g.14580::m.14580	3-458[+]	gi|743935625|ref|XM_011013882.1|	1580	E:0	PREDICTED: Populus euphratica 26.5 kDa heat shock protein, mitochondrial (LOC105116491), mRNA	gi|224059176|ref|XP_002299753.1|	239	E:5e-100	26.5 kDa class I small heat shock family protein [Populus trichocarpa]	HS26M_ARATH	158	E:3e-44	RecName: Full=26.5 kDa heat shock protein, mitochondrial;^Eukaryota; Viridiplantae; Streptophyta; Embryophyta; Tracheophyta; Spermatophyta; Magnoliophyta; eudicotyledons; Gunneridae; Pentapetalae; rosids; malvids; Brassicales; Brassicaceae; Camelineae; Arabidopsis	HS26M_ARATH	52	E:2e-07	RecName: Full=26.5 kDa heat shock protein, mitochondrial;^Eukaryota; Viridiplantae; Streptophyta; Embryophyta; Tracheophyta; Spermatophyta; Magnoliophyta; eudicotyledons; Gunneridae; Pentapetalae; rosids; malvids; Brassicales; Brassicaceae; Camelineae; Arabidopsis	.	.	.	COG0071	response to heat	.	.	.	GO:0009408|response to heat;GO:0009644|response to high light intensity;GO:0042542|response to hydrogen peroxide	.	GO:0005739|mitochondrion
f2p60_364_37983	-1.24079	0.0099136	down	yes	-0.505612	0.225851	down	no	0.137256	0.693584	up	no	-0.351982	0.287356	down	no	-0.504192	0.127268	down	no	.	.	gi|566179032|ref|XM_002309727.2|	556	E:1e-155	Populus trichocarpa hypothetical protein (POPTR_0007s01310g) mRNA, complete cds	gi|566179026|ref|XP_006380278.1|	119	E:3e-34	hypothetical protein POPTR_0007s01270g [Populus trichocarpa]	.	.	.	.	.	.	.	.	.	.	.	.	.	.	.	.	.	.	.
f2p60_1705_23786	-1.23441	1.05545e-60	down	yes	-0.813691	3.26253e-35	down	no	-1.0173	5.21597e-43	down	yes	-0.361574	NA	down	no	-0.554417	NA	down	no	Gene.11943::f2p60_1705_transcript23786_g4::g.11943::m.11943	90-1298[+]	gi|566155465|ref|XM_002300565.2|	3033	E:0	Populus trichocarpa hypothetical protein (POPTR_0002s00230g) mRNA, complete cds	gi|566155466|ref|XP_002300601.2|	825	E:0	hypothetical protein POPTR_0002s00230g [Populus trichocarpa]	DNJ10_ARATH	571	E:0	RecName: Full=Chaperone protein dnaJ 10;^Eukaryota; Viridiplantae; Streptophyta; Embryophyta; Tracheophyta; Spermatophyta; Magnoliophyta; eudicotyledons; Gunneridae; Pentapetalae; rosids; malvids; Brassicales; Brassicaceae; Camelineae; Arabidopsis	DNJ10_ARATH	570	E:0	RecName: Full=Chaperone protein dnaJ 10;^Eukaryota; Viridiplantae; Streptophyta; Embryophyta; Tracheophyta; Spermatophyta; Magnoliophyta; eudicotyledons; Gunneridae; Pentapetalae; rosids; malvids; Brassicales; Brassicaceae; Camelineae; Arabidopsis	PF00226.30	DnaJ	DnaJ domain	COG2214	DNAj domain protein	.	.	.	.	.	.
f3p60_810_32354	0.683035	4.1747e-06	up	no	2.79795	9.41069e-163	up	yes	1.30229	7.27306e-23	up	yes	1.35985	5.60104e-20	up	yes	1.87378	1.27784e-36	up	yes	Gene.15758::f3p60_810_transcript32354_g3::g.15758::m.15758	1-507[+]	gi|566167118|ref|XM_002305464.2|	1371	E:0	Populus trichocarpa hypothetical protein (POPTR_0004s17810g) mRNA, complete cds	gi|566167119|ref|XP_002305500.2|	294	E:4e-98	hypothetical protein POPTR_0004s17810g [Populus trichocarpa]	DNJ11_ARATH	114	E:2e-29	RecName: Full=Chaperone protein dnaJ 11, chloroplastic;^Eukaryota; Viridiplantae; Streptophyta; Embryophyta; Tracheophyta; Spermatophyta; Magnoliophyta; eudicotyledons; Gunneridae; Pentapetalae; rosids; malvids; Brassicales; Brassicaceae; Camelineae; Arabidopsis	DNJ11_ARATH	117	E:8e-32	RecName: Full=Chaperone protein dnaJ 11, chloroplastic;^Eukaryota; Viridiplantae; Streptophyta; Embryophyta; Tracheophyta; Spermatophyta; Magnoliophyta; eudicotyledons; Gunneridae; Pentapetalae; rosids; malvids; Brassicales; Brassicaceae; Camelineae; Arabidopsis	PF00226.30	DnaJ	DnaJ domain	COG2214	DNAj domain protein	.	.	.	.	.	GO:0009507|chloroplast;GO:0009570|chloroplast stroma;GO:0005634|nucleus;GO:0009536|plastid
f2p60_820_32228	1.3366	1.09197e-10	up	yes	2.97066	6.00921e-86	up	yes	2.15574	4.03233e-33	up	yes	1.87161	8.67084e-25	up	yes	2.20257	1.93738e-33	up	yes	Gene.15709::f2p60_820_transcript32228_g8::g.15709::m.15709	2-556[+]	gi|566155814|ref|XM_002301934.2|	1434	E:0	Populus trichocarpa hypothetical protein (POPTR_0002s02220g) mRNA, complete cds	gi|224065833|ref|XP_002301970.1|	305	E:4e-102	hypothetical protein POPTR_0002s02220g [Populus trichocarpa]	DNJ11_ARATH	103	E:2e-25	RecName: Full=Chaperone protein dnaJ 11, chloroplastic;^Eukaryota; Viridiplantae; Streptophyta; Embryophyta; Tracheophyta; Spermatophyta; Magnoliophyta; eudicotyledons; Gunneridae; Pentapetalae; rosids; malvids; Brassicales; Brassicaceae; Camelineae; Arabidopsis	DNJ11_ARATH	104	E:1e-26	RecName: Full=Chaperone protein dnaJ 11, chloroplastic;^Eukaryota; Viridiplantae; Streptophyta; Embryophyta; Tracheophyta; Spermatophyta; Magnoliophyta; eudicotyledons; Gunneridae; Pentapetalae; rosids; malvids; Brassicales; Brassicaceae; Camelineae; Arabidopsis	PF00226.30	DnaJ	DnaJ domain	COG2214	DNAj domain protein	.	.	.	.	.	GO:0009507|chloroplast;GO:0009570|chloroplast stroma;GO:0005634|nucleus;GO:0009536|plastid
f2p20_1486_7288	1.43124	6.63971e-105	up	yes	1.02426	1.38415e-54	up	yes	0.559556	4.72859e-13	up	no	0.183019	0.0519297	up	no	-0.0555951	0.537174	down	no	Gene.4701::f2p20_1486_transcript7288_g1::g.4701::m.4701	191-1240[+]	gi|566203836|ref|XM_002320945.2|	2641	E:0	Populus trichocarpa DNAJ heat shock family protein (POPTR_0014s11770g) mRNA, complete cds	gi|566203837|ref|XP_002320981.2|	694	E:0	DNAJ heat shock family protein [Populus trichocarpa]	DNJ19_ARATH	561	E:0	RecName: Full=DnaJ protein ERDJ3B;^Eukaryota; Viridiplantae; Streptophyta; Embryophyta; Tracheophyta; Spermatophyta; Magnoliophyta; eudicotyledons; Gunneridae; Pentapetalae; rosids; malvids; Brassicales; Brassicaceae; Camelineae; Arabidopsis	DNJ19_ARATH	564	E:0	RecName: Full=DnaJ protein ERDJ3B;^Eukaryota; Viridiplantae; Streptophyta; Embryophyta; Tracheophyta; Spermatophyta; Magnoliophyta; eudicotyledons; Gunneridae; Pentapetalae; rosids; malvids; Brassicales; Brassicaceae; Camelineae; Arabidopsis	PF00226.30	DnaJ	DnaJ domain	COG0484	ATP binding to DnaK triggers the release of the substrate protein, thus completing the reaction cycle. Several rounds of ATP-dependent interactions between DnaJ, DnaK and GrpE are required for fully efficient folding. Also involved, together with DnaK and GrpE, in the DNA replication of plasmids through activation of initiation proteins (By similarity)	.	ExpAA=19.91^PredHel=1^Topology=i9-28o	.	GO:0052033|pathogen-associated molecular pattern dependent induction by symbiont of host innate immune response;GO:0006457|protein folding	GO:0051082|unfolded protein binding	GO:0005783|endoplasmic reticulum;GO:0005788|endoplasmic reticulum lumen;GO:0005886|plasma membrane
f2p60_736_334021	-1.12564	6.05852e-26	down	yes	-0.312034	0.000823704	down	no	0.0707453	0.532298	up	no	-0.133401	0.399763	down	no	-0.151063	0.235321	down	no	Gene.16105::f2p60_736_transcript33402_g11::g.16105::m.16105	2-511[+]	gi|566179032|ref|XM_002309727.2|	1216	E:0	Populus trichocarpa hypothetical protein (POPTR_0007s01310g) mRNA, complete cds	gi|566179026|ref|XP_006380278.1|	336	E:2e-114	hypothetical protein POPTR_0007s01270g [Populus trichocarpa]	DJB13_HUMAN	170	E:4e-49	RecName: Full=DnaJ homolog subfamily B member 13;^Eukaryota; Metazoa; Chordata; Craniata; Vertebrata; Euteleostomi; Mammalia; Eutheria; Euarchontoglires; Primates; Haplorrhini; Catarrhini; Hominidae; Homo	DJB13_HUMAN	169	E:4e-50	RecName: Full=DnaJ homolog subfamily B member 13;^Eukaryota; Metazoa; Chordata; Craniata; Vertebrata; Euteleostomi; Mammalia; Eutheria; Euarchontoglires; Primates; Haplorrhini; Catarrhini; Hominidae; Homo	PF01556.17	DnaJ_C	DnaJ C terminal domain	COG0484	ATP binding to DnaK triggers the release of the substrate protein, thus completing the reaction cycle. Several rounds of ATP-dependent interactions between DnaJ, DnaK and GrpE are required for fully efficient folding. Also involved, together with DnaK and GrpE, in the DNA replication of plasmids through activation of initiation proteins (By similarity)	.	.	.	GO:1904158|axonemal central apparatus assembly;GO:0006457|protein folding	GO:0051082|unfolded protein binding	GO:0005930|axoneme;GO:0005737|cytoplasm;GO:0031514|motile cilium;GO:0036126|sperm flagellum
f2p55_825_32338	-0.440406	0.112738	down	no	-1.01105	4.45652e-16	down	yes	-0.311861	0.219247	down	no	-0.514735	0.00151656	down	no	-0.158661	0.425836	down	no	Gene.15749::f2p55_825_transcript32338_g2::g.15749::m.15749	3-512[+]	gi|566192642|ref|XM_002316443.2|	1345	E:0	Populus trichocarpa DnaJ family protein (POPTR_0010s24930g) mRNA, complete cds	gi|224113389|ref|XP_002316479.1|	301	E:8e-97	DnaJ family protein [Populus trichocarpa]	DNJH_CUCSA	265	E:2e-84	RecName: Full=DnaJ protein homolog;^Eukaryota; Viridiplantae; Streptophyta; Embryophyta; Tracheophyta; Spermatophyta; Magnoliophyta; eudicotyledons; Gunneridae; Pentapetalae; rosids; fabids; Cucurbitales; Cucurbitaceae; Benincaseae; Cucumis	DNJH2_ALLPO	309	E:3e-103	RecName: Full=DnaJ protein homolog 2;^Eukaryota; Viridiplantae; Streptophyta; Embryophyta; Tracheophyta; Spermatophyta; Magnoliophyta; Liliopsida; Asparagales; Amaryllidaceae; Allioideae; Allieae; Allium	PF01556.17	DnaJ_C	DnaJ C terminal domain	.	.	.	.	.	GO:0006457|protein folding;GO:0009408|response to heat	GO:0005524|ATP binding;GO:0031072|heat shock protein binding;GO:0046872|metal ion binding;GO:0051082|unfolded protein binding	GO:0016020|membrane
f2p60_2197_21266	-0.936651	5.26873e-19	down	no	-1.02814	1.97031e-19	down	yes	-0.719201	4.1487e-12	down	no	-0.462837	2.00112e-06	down	no	-0.405611	0.000152976	down	no	Gene.10353::f2p60_2197_transcript21266_g3::g.10353::m.10353	99-2054[+]	gi|224100974|ref|XM_002312056.1|	3341	E:0	Populus trichocarpa heat shock protein 70 cognate (POPTR_0008s05500g) mRNA, complete cds	gi|224100975|ref|XP_002312092.1|	1268	E:0	heat shock protein 70 cognate [Populus trichocarpa]	MD37C_ARATH	964	E:0	RecName: Full=Probable mediator of RNA polymerase II transcription subunit 37c;^Eukaryota; Viridiplantae; Streptophyta; Embryophyta; Tracheophyta; Spermatophyta; Magnoliophyta; eudicotyledons; Gunneridae; Pentapetalae; rosids; malvids; Brassicales; Brassicaceae; Camelineae; Arabidopsis	MD37C_ARATH	962	E:0	RecName: Full=Probable mediator of RNA polymerase II transcription subunit 37c;^Eukaryota; Viridiplantae; Streptophyta; Embryophyta; Tracheophyta; Spermatophyta; Magnoliophyta; eudicotyledons; Gunneridae; Pentapetalae; rosids; malvids; Brassicales; Brassicaceae; Camelineae; Arabidopsis	PF00012.19	HSP70	Hsp70 protein	COG0443	Heat shock protein	.	.	.	GO:0016567|protein ubiquitination;GO:0006355|regulation of transcription, DNA-templated;GO:0009617|response to bacterium;GO:0046686|response to cadmium ion;GO:0009408|response to heat;GO:0009644|response to high light intensity;GO:0042542|response to hydrogen peroxide;GO:0009266|response to temperature stimulus;GO:0009615|response to virus;GO:0006351|transcription, DNA-templatedGO:0000902|cell mo…	GO:0005524|ATP binding;GO:0031625|ubiquitin protein ligase binding	GO:0048046|apoplast;GO:0005618|cell wall;GO:0005829|cytosol;GO:0005794|Golgi apparatus;GO:0005739|mitochondrion;GO:0005634|nucleus;GO:0005886|plasma membrane;GO:0005774|vacuolar membrane
f2p20_2641_20032	2.00968	0	up	yes	1.51904	6.32232e-181	up	yes	0.812376	4.54444e-44	up	no	0.112091	NA	up	no	-0.227146	0.00308475	down	no	Gene.9520::f2p20_2641_transcript20032_g1::g.9520::m.9520	125-2125[+]	gi|566162617|ref|XM_002303636.2|	4460	E:0	Populus trichocarpa BiP isoform A family protein (POPTR_0003s14360g) mRNA, complete cds	gi|224072248|ref|XP_002303672.1|	1296	E:0	BiP isoform A family protein [Populus trichocarpa]	BIP4_TOBAC	1227	E:0	RecName: Full=Luminal-binding protein 4;^Eukaryota; Viridiplantae; Streptophyta; Embryophyta; Tracheophyta; Spermatophyta; Magnoliophyta; eudicotyledons; Gunneridae; Pentapetalae; asterids; lamiids; Solanales; Solanaceae; Nicotianoideae; Nicotianeae; Nicotiana	BIP5_TOBAC	1266	E:0	RecName: Full=Luminal-binding protein 5;^Eukaryota; Viridiplantae; Streptophyta; Embryophyta; Tracheophyta; Spermatophyta; Magnoliophyta; eudicotyledons; Gunneridae; Pentapetalae; asterids; lamiids; Solanales; Solanaceae; Nicotianoideae; Nicotianeae; Nicotiana	PF00012.19	HSP70	Hsp70 protein	.	.	.	ExpAA=19.99^PredHel=1^Topology=i7-26o	.	GO:0000902|cell morphogenesis	GO:0005524|ATP binding	GO:0005788|endoplasmic reticulum lumen
f2p35_2260_3272	1.90526	3.63365e-33	up	yes	1.46256	6.34753e-19	up	yes	0.543546	0.00549386	up	no	0.134524	0.579293	up	no	-0.391066	0.0710485	down	no	Gene.2574::f2p35_2260_transcript3272_g1::g.2574::m.2574	89-2095[+]	gi|566196409|ref|XM_002317753.2|	3823	E:0	Populus trichocarpa BiP isoform A family protein (POPTR_0012s02470g) mRNA, complete cds	gi|566196410|ref|XP_002317789.2|	1212	E:0	BiP isoform A family protein [Populus trichocarpa]	BIP5_TOBAC	1122	E:0	RecName: Full=Luminal-binding protein 5;^Eukaryota; Viridiplantae; Streptophyta; Embryophyta; Tracheophyta; Spermatophyta; Magnoliophyta; eudicotyledons; Gunneridae; Pentapetalae; asterids; lamiids; Solanales; Solanaceae; Nicotianoideae; Nicotianeae; Nicotiana	BIP5_TOBAC	1240	E:0	RecName: Full=Luminal-binding protein 5;^Eukaryota; Viridiplantae; Streptophyta; Embryophyta; Tracheophyta; Spermatophyta; Magnoliophyta; eudicotyledons; Gunneridae; Pentapetalae; asterids; lamiids; Solanales; Solanaceae; Nicotianoideae; Nicotianeae; Nicotiana	PF00012.19	HSP70	Hsp70 protein	.	.	.	ExpAA=20.01^PredHel=1^Topology=i7-29o	.	GO:0000902|cell morphogenesis	GO:0005524|ATP binding	GO:0005788|endoplasmic reticulum lumen
f3p60_2428_2921	1.66119	4.2424e-193	up	yes	1.19693	1.07965e-102	up	yes	0.580395	7.35151e-14	up	no	0.06696	0.52859	up	no	-0.186111	0.0246409	down	no	Gene.2358::f3p60_2428_transcript2921_g1::g.2358::m.2358	3-2126[+]	gi|224058096|ref|XM_002299412.1|	4119	E:0	Populus trichocarpa BiP isoform A family protein (POPTR_0001s11010g) mRNA, complete cds	gi|224058097|ref|XP_002299448.1|	1245	E:0	BiP isoform A family protein [Populus trichocarpa]	BIP5_TOBAC	1188	E:0	RecName: Full=Luminal-binding protein 5;^Eukaryota; Viridiplantae; Streptophyta; Embryophyta; Tracheophyta; Spermatophyta; Magnoliophyta; eudicotyledons; Gunneridae; Pentapetalae; asterids; lamiids; Solanales; Solanaceae; Nicotianoideae; Nicotianeae; Nicotiana	BIP5_TOBAC	1269	E:0	RecName: Full=Luminal-binding protein 5;^Eukaryota; Viridiplantae; Streptophyta; Embryophyta; Tracheophyta; Spermatophyta; Magnoliophyta; eudicotyledons; Gunneridae; Pentapetalae; asterids; lamiids; Solanales; Solanaceae; Nicotianoideae; Nicotianeae; Nicotiana	PF00012.19	HSP70	Hsp70 protein	.	.	.	ExpAA=20.25^PredHel=1^Topology=i46-68o	.	GO:0000902|cell morphogenesis	GO:0005524|ATP binding	GO:0005788|endoplasmic reticulum lumen
f15p60_2882_19544	1.13542	8.26334e-126	up	yes	0.680068	8.50527e-48	up	no	0.29827	0.000477926	up	no	-0.0805449	0.15933	down	no	-0.241646	0.00117413	down	no	Gene.9168::f15p60_2882_transcript19544_g1::g.9168::m.9168	603-2597[+]	gi|566173330|ref|XM_002307696.2|	4920	E:0	Populus trichocarpa hypothetical protein (POPTR_0005s26260g) mRNA, complete cds	gi|224085900|ref|XP_002307732.1|	1204	E:0	hypothetical protein POPTR_0005s26260g [Populus trichocarpa]	ENPL_CATRO	1072	E:0	RecName: Full=Endoplasmin homolog;^Eukaryota; Viridiplantae; Streptophyta; Embryophyta; Tracheophyta; Spermatophyta; Magnoliophyta; eudicotyledons; Gunneridae; Pentapetalae; asterids; lamiids; Gentianales; Apocynaceae; Rauvolfioideae; Vinceae; Catharanthinae; Catharanthus	ENPL_CATRO	1049	E:0	RecName: Full=Endoplasmin homolog;^Eukaryota; Viridiplantae; Streptophyta; Embryophyta; Tracheophyta; Spermatophyta; Magnoliophyta; eudicotyledons; Gunneridae; Pentapetalae; asterids; lamiids; Gentianales; Apocynaceae; Rauvolfioideae; Vinceae; Catharanthinae; Catharanthus	PF00183.17	HSP90	Hsp90 protein	.	.	.	.	.	GO:0006457|protein folding;GO:0006950|response to stressGO:0006457|protein folding;GO:0006950|response to stress	GO:0005524|ATP binding;GO:0051082|unfolded protein bindingGO:0005524|ATP binding;GO:0051082|unfolded protein binding	GO:0005788|endoplasmic reticulum lumen
f2p54_3233_18923	1.20826	2.86454e-57	up	yes	0.806844	1.80685e-25	up	no	0.425165	7.71721e-06	up	no	0.122573	0.190866	up	no	-0.152484	0.180844	down	no	Gene.8770::f2p54_3233_transcript18923_g1::g.8770::m.8770	150-2867[+]	gi|743928682|ref|XM_011010249.1|	5524	E:0	PREDICTED: Populus euphratica heat shock 70 kDa protein 17-like (LOC105113899), mRNA	gi|743928683|ref|XP_011008551.1|	1649	E:0	PREDICTED: heat shock 70 kDa protein 17-like [Populus euphratica]	HSP7R_ARATH	1170	E:0	RecName: Full=Heat shock 70 kDa protein 17;^Eukaryota; Viridiplantae; Streptophyta; Embryophyta; Tracheophyta; Spermatophyta; Magnoliophyta; eudicotyledons; Gunneridae; Pentapetalae; rosids; malvids; Brassicales; Brassicaceae; Camelineae; Arabidopsis	HSP7R_ARATH	1247	E:0	RecName: Full=Heat shock 70 kDa protein 17;^Eukaryota; Viridiplantae; Streptophyta; Embryophyta; Tracheophyta; Spermatophyta; Magnoliophyta; eudicotyledons; Gunneridae; Pentapetalae; rosids; malvids; Brassicales; Brassicaceae; Camelineae; Arabidopsis	PF00012.19	HSP70	Hsp70 protein	COG0443	Heat shock protein	.	.	.	.	GO:0005524|ATP binding	GO:0009507|chloroplast;GO:0005783|endoplasmic reticulum;GO:0005788|endoplasmic reticulum lumen;GO:0005794|Golgi apparatus;GO:0005774|vacuolar membrane
f2p52_3326_1172	1.77726	8.59784e-113	up	yes	1.18868	3.05884e-41	up	yes	0.595772	6.42249e-08	up	no	0.0312651	0.811659	up	no	-0.201061	0.11229	down	no	Gene.1113::f2p52_3326_transcript1172_g1::g.1113::m.1113	155-2854[+]	gi|566174072|ref|XM_002308790.2|	5742	E:0	Populus trichocarpa hypothetical protein (POPTR_0006s02290g) mRNA, complete cds	gi|224089829|ref|XP_002308826.1|	1751	E:0	hypothetical protein POPTR_0006s02290g [Populus trichocarpa]	HSP7R_ARATH	1229	E:0	RecName: Full=Heat shock 70 kDa protein 17;^Eukaryota; Viridiplantae; Streptophyta; Embryophyta; Tracheophyta; Spermatophyta; Magnoliophyta; eudicotyledons; Gunneridae; Pentapetalae; rosids; malvids; Brassicales; Brassicaceae; Camelineae; Arabidopsis	HSP7R_ARATH	1248	E:0	RecName: Full=Heat shock 70 kDa protein 17;^Eukaryota; Viridiplantae; Streptophyta; Embryophyta; Tracheophyta; Spermatophyta; Magnoliophyta; eudicotyledons; Gunneridae; Pentapetalae; rosids; malvids; Brassicales; Brassicaceae; Camelineae; Arabidopsis	PF00012.19	HSP70	Hsp70 protein	COG0443	Heat shock protein	.	.	.	.	GO:0005524|ATP binding	GO:0009507|chloroplast;GO:0005783|endoplasmic reticulum;GO:0005788|endoplasmic reticulum lumen;GO:0005794|Golgi apparatus;GO:0005774|vacuolar membrane
f2p60_626_34875	1.08584	2.03911e-23	up	yes	0.529706	3.35785e-07	up	no	0.284228	0.0123522	up	no	-0.160263	0.234707	down	no	-0.0694069	0.574027	down	no	Gene.16451::f2p60_626_transcript34875_g6::g.16451::m.16451	1-369[+]	gi|566186942|ref|XM_002313919.2|	1042	E:0	Populus trichocarpa heat shock protein 70 (POPTR_0009s08320g) mRNA, complete cds	gi|224105855|ref|XP_002313955.1|	191	E:6e-54	heat shock protein 70 [Populus trichocarpa]	HSP7M_PHAVU	169	E:4e-47	RecName: Full=Heat shock 70 kDa protein, mitochondrial;^Eukaryota; Viridiplantae; Streptophyta; Embryophyta; Tracheophyta; Spermatophyta; Magnoliophyta; eudicotyledons; Gunneridae; Pentapetalae; rosids; fabids; Fabales; Fabaceae; Papilionoideae; Phaseoleae; Phaseolus	HSP7M_PHAVU	177	E:1e-51	RecName: Full=Heat shock 70 kDa protein, mitochondrial;^Eukaryota; Viridiplantae; Streptophyta; Embryophyta; Tracheophyta; Spermatophyta; Magnoliophyta; eudicotyledons; Gunneridae; Pentapetalae; rosids; fabids; Fabales; Fabaceae; Papilionoideae; Phaseoleae; Phaseolus	PF00012.19	HSP70	Hsp70 protein	.	.	.	.	.	GO:0006457|protein foldingGO:0006869|lipid transport;GO:0042157|lipoprotein metabolic process	GO:0005524|ATP binding;GO:0051082|unfolded protein bindingGO:0008289|lipid binding	GO:0005739|mitochondrionGO:0005576|extracellular region
f2p38_2270_20996	1.37012	2.0299e-101	up	yes	0.513823	8.25839e-14	up	no	0.0284009	0.718516	up	no	0.0974075	0.423689	up	no	-0.059265	0.472406	down	no	Gene.10171::f2p38_2270_transcript20996_g1::g.10171::m.10171	99-2045[+]	gi|566182496|ref|XM_002311125.2|	3971	E:0	Populus trichocarpa heat shock protein 70 (POPTR_0008s05410g) mRNA, complete cds	gi|224098390|ref|XP_002311161.1|	1251	E:0	heat shock protein 70 [Populus trichocarpa]	HSP7C_PETHY	1177	E:0	RecName: Full=Heat shock cognate 70 kDa protein;^Eukaryota; Viridiplantae; Streptophyta; Embryophyta; Tracheophyta; Spermatophyta; Magnoliophyta; eudicotyledons; Gunneridae; Pentapetalae; asterids; lamiids; Solanales; Solanaceae; Petunioideae; Petunia	HSP7C_PETHY	1254	E:0	RecName: Full=Heat shock cognate 70 kDa protein;^Eukaryota; Viridiplantae; Streptophyta; Embryophyta; Tracheophyta; Spermatophyta; Magnoliophyta; eudicotyledons; Gunneridae; Pentapetalae; asterids; lamiids; Solanales; Solanaceae; Petunioideae; Petunia	PF00012.19	HSP70	Hsp70 protein	.	.	.	.	.	GO:0000902|cell morphogenesis	GO:0005524|ATP binding	.
f2p60_1109_28839	1.83413	9.81678e-41	up	yes	0.144642	0.0227386	up	no	0.208849	0.0304515	up	no	-0.0711892	0.372469	down	no	0.00402346	0.970711	up	no	Gene.14337::f2p60_1109_transcript28839_g4::g.14337::m.14337	1-771[+]	gi|566191988|ref|XM_006378652.1|	1781	E:0	Populus trichocarpa heat shock protein 70 cognate (POPTR_0010s21270g) mRNA, complete cds	gi|743844357|ref|XP_011027182.1|	406	E:1e-133	PREDICTED: heat shock cognate 70 kDa protein 2-like [Populus euphratica]	HSP72_SOLLC	387	E:2e-127	RecName: Full=Heat shock cognate 70 kDa protein 2;^Eukaryota; Viridiplantae; Streptophyta; Embryophyta; Tracheophyta; Spermatophyta; Magnoliophyta; eudicotyledons; Gunneridae; Pentapetalae; asterids; lamiids; Solanales; Solanaceae; Solanoideae; Solaneae; Solanum; Lycopersicon	HSP71_SOLLC	470	E:2e-161	RecName: Full=Heat shock cognate 70 kDa protein 1;^Eukaryota; Viridiplantae; Streptophyta; Embryophyta; Tracheophyta; Spermatophyta; Magnoliophyta; eudicotyledons; Gunneridae; Pentapetalae; asterids; lamiids; Solanales; Solanaceae; Solanoideae; Solaneae; Solanum; Lycopersicon	PF00012.19	HSP70	Hsp70 protein	COG0443	Heat shock protein	.	.	.	.	GO:0005524|ATP binding	.
f2p60_2370_3064	1.42551	1.96188e-207	up	yes	0.146593	0.0044532	up	no	0.0591985	0.320039	up	no	0.0955844	0.0924507	up	no	0.105665	0.0801432	up	no	Gene.2433::f2p60_2370_transcript3064_g1::g.2433::m.2433	81-2027[+]	gi|566182504|ref|XM_002312054.2|	3949	E:0	Populus trichocarpa heat shock protein 70 cognate (POPTR_0008s05480g) mRNA, complete cds	gi|224100971|ref|XP_002312090.1|	1185	E:0	heat shock protein 70 cognate [Populus trichocarpa]	HSP72_SOLLC	1142	E:0	RecName: Full=Heat shock cognate 70 kDa protein 2;^Eukaryota; Viridiplantae; Streptophyta; Embryophyta; Tracheophyta; Spermatophyta; Magnoliophyta; eudicotyledons; Gunneridae; Pentapetalae; asterids; lamiids; Solanales; Solanaceae; Solanoideae; Solaneae; Solanum; Lycopersicon	HSP72_SOLLC	1236	E:0	RecName: Full=Heat shock cognate 70 kDa protein 2;^Eukaryota; Viridiplantae; Streptophyta; Embryophyta; Tracheophyta; Spermatophyta; Magnoliophyta; eudicotyledons; Gunneridae; Pentapetalae; asterids; lamiids; Solanales; Solanaceae; Solanoideae; Solaneae; Solanum; Lycopersicon	PF00012.19	HSP70	Hsp70 protein	COG0443	Heat shock protein	.	.	.	GO:0000902|cell morphogenesis	GO:0005524|ATP binding	.
f2p48_2373_20709	1.40999	6.77972e-100	up	yes	0.342725	1.45918e-06	up	no	0.132578	0.0803017	up	no	0.119883	0.206187	up	no	0.121621	0.16278	up	no	Gene.9973::f2p48_2373_transcript20709_g1::g.9973::m.9973	82-2028[+]	gi|566191988|ref|XM_006378652.1|	3834	E:0	Populus trichocarpa heat shock protein 70 cognate (POPTR_0010s21270g) mRNA, complete cds	gi|566191989|ref|XP_006378714.1|	1193	E:0	heat shock protein 70 cognate [Populus trichocarpa]	HSP72_SOLLC	1146	E:0	RecName: Full=Heat shock cognate 70 kDa protein 2;^Eukaryota; Viridiplantae; Streptophyta; Embryophyta; Tracheophyta; Spermatophyta; Magnoliophyta; eudicotyledons; Gunneridae; Pentapetalae; asterids; lamiids; Solanales; Solanaceae; Solanoideae; Solaneae; Solanum; Lycopersicon	HSP72_SOLLC	1238	E:0	RecName: Full=Heat shock cognate 70 kDa protein 2;^Eukaryota; Viridiplantae; Streptophyta; Embryophyta; Tracheophyta; Spermatophyta; Magnoliophyta; eudicotyledons; Gunneridae; Pentapetalae; asterids; lamiids; Solanales; Solanaceae; Solanoideae; Solaneae; Solanum; Lycopersicon	PF00012.19	HSP70	Hsp70 protein	COG0443	Heat shock protein	.	.	.	GO:0000902|cell morphogenesis	GO:0005524|ATP binding	.
f2p60_707_338683	1.29149	2.31391e-13	up	yes	0.310072	3.31463e-05	up	no	0.438374	4.10244e-05	up	no	0.0914575	0.358664	up	no	0.1363	0.302101	up	no	Gene.16223::f2p60_707_transcript33868_g13::g.16223::m.16223	1-441[+]	gi|566155302|ref|XM_002299012.2|	1066	E:0	Populus trichocarpa hypothetical protein (POPTR_0001s47020g) mRNA, complete cds	gi|743892930|ref|XP_011039800.1|	254	E:7e-77	PREDICTED: heat shock protein 90-2 [Populus euphratica]	HSP80_SOLLC	227	E:7e-68	RecName: Full=Heat shock cognate protein 80;^Eukaryota; Viridiplantae; Streptophyta; Embryophyta; Tracheophyta; Spermatophyta; Magnoliophyta; eudicotyledons; Gunneridae; Pentapetalae; asterids; lamiids; Solanales; Solanaceae; Solanoideae; Solaneae; Solanum; Lycopersicon	HSP80_SOLLC	274	E:6e-87	RecName: Full=Heat shock cognate protein 80;^Eukaryota; Viridiplantae; Streptophyta; Embryophyta; Tracheophyta; Spermatophyta; Magnoliophyta; eudicotyledons; Gunneridae; Pentapetalae; asterids; lamiids; Solanales; Solanaceae; Solanoideae; Solaneae; Solanum; Lycopersicon	PF00183.17	HSP90	Hsp90 protein	COG0326	Molecular chaperone. Has ATPase activity (By similarity)	.	.	.	GO:0006457|protein folding;GO:0006950|response to stressGO:0006457|protein folding;GO:0006950|response to stress	GO:0005524|ATP binding;GO:0051082|unfolded protein bindingGO:0005524|ATP binding;GO:0051082|unfolded protein binding	GO:0005737|cytoplasm
f4p60_2158_3748	1.57512	5.51314e-137	up	yes	0.961938	3.28994e-55	up	no	0.791116	2.76616e-21	up	no	0.27135	0.000564809	up	no	0.163611	0.0354766	up	no	Gene.2851::f4p60_2158_transcript3748_g1::g.2851::m.2851	1776-2081[-]	gi|743916352|ref|XM_011003847.1|	3650	E:0	PREDICTED: Populus euphratica chaperonin CPN60-2, mitochondrial (LOC105109224), mRNA	gi|566148864|ref|XP_002299295.2|	1150	E:0	Chaperonin CPN60-2 family protein [Populus trichocarpa]	CH62_CUCMA	1039	E:0	RecName: Full=Chaperonin CPN60-2, mitochondrial;^Eukaryota; Viridiplantae; Streptophyta; Embryophyta; Tracheophyta; Spermatophyta; Magnoliophyta; eudicotyledons; Gunneridae; Pentapetalae; rosids; fabids; Cucurbitales; Cucurbitaceae; Cucurbiteae; Cucurbita	.	.	.	.	.	.	.	.	.	.	.	.	.	.	.
f4p60_436_16261	1.58058	9.48461e-43	up	yes	0.0316331	0.801372	up	no	0.0679471	0.642552	up	no	-0.073136	0.622141	down	no	-0.0931934	0.543001	down	no	.	.	gi|566182504|ref|XM_002312054.2|	614	E:1e-172	Populus trichocarpa heat shock protein 70 cognate (POPTR_0008s05480g) mRNA, complete cds	gi|38488582|dbj|BAD02273.1|	63.5	E:8e-11	heat shock protein 70 [Nicotiana benthamiana]	HSP7C_PETHY	60.5	E:7e-10	RecName: Full=Heat shock cognate 70 kDa protein;^Eukaryota; Viridiplantae; Streptophyta; Embryophyta; Tracheophyta; Spermatophyta; Magnoliophyta; eudicotyledons; Gunneridae; Pentapetalae; asterids; lamiids; Solanales; Solanaceae; Petunioideae; Petunia	.	.	.	.	.	.	.	.	.	.	.	.	.	GO:0005524|ATP binding	.
f2p60_492_36565	1.1871	0.00165032	up	yes	1.00473	0.0067155	up	yes	0.328789	0.361682	up	no	-0.0335022	0.920541	down	no	0.113019	0.731672	up	no	.	.	gi|566151626|ref|XM_002300275.2|	693	E:0	Populus trichocarpa heat shock protein 70 (POPTR_0001s29210g) mRNA, complete cds	gi|566151627|ref|XP_002300311.2|	107	E:2e-24	heat shock protein 70 [Populus trichocarpa]	HSP7M_PHAVU	94	E:5e-21	RecName: Full=Heat shock 70 kDa protein, mitochondrial;^Eukaryota; Viridiplantae; Streptophyta; Embryophyta; Tracheophyta; Spermatophyta; Magnoliophyta; eudicotyledons; Gunneridae; Pentapetalae; rosids; fabids; Fabales; Fabaceae; Papilionoideae; Phaseoleae; Phaseolus	.	.	.	.	.	.	.	.	.	.	.	.	GO:0006457|protein folding	GO:0005524|ATP binding;GO:0051082|unfolded protein binding	GO:0005739|mitochondrion
f2p55_422_37366	1.28936	2.05889e-07	up	yes	0.601845	0.0279985	up	no	0.0147213	0.957842	up	no	-0.469801	0.107421	down	no	-0.130566	0.631843	down	no	.	.	gi|566186942|ref|XM_002313919.2|	664	E:0	Populus trichocarpa heat shock protein 70 (POPTR_0009s08320g) mRNA, complete cds	gi|224105855|ref|XP_002313955.1|	103	E:2e-23	heat shock protein 70 [Populus trichocarpa]	HSP7M_PHAVU	91.3	E:2e-20	RecName: Full=Heat shock 70 kDa protein, mitochondrial;^Eukaryota; Viridiplantae; Streptophyta; Embryophyta; Tracheophyta; Spermatophyta; Magnoliophyta; eudicotyledons; Gunneridae; Pentapetalae; rosids; fabids; Fabales; Fabaceae; Papilionoideae; Phaseoleae; Phaseolus	.	.	.	.	.	.	.	.	.	.	.	.	GO:0006457|protein folding	GO:0005524|ATP binding;GO:0051082|unfolded protein binding	GO:0005739|mitochondrion
f2p60_634_34897	1.40382	2.97008e-16	up	yes	0.556611	0.00393658	up	no	0.525454	0.0261008	up	no	0.218807	0.376362	up	no	-0.475216	0.0285321	down	no	Gene.16458::f2p60_634_transcript34897_g9::g.16458::m.16458	1-342[+]	gi|566165381|ref|XM_002305227.2|	1098	E:0	Populus trichocarpa hypothetical protein (POPTR_0004s07190g) mRNA, complete cds	gi|566210618|ref|XP_006372391.1|	180	E:6e-50	hypothetical protein POPTR_0017s01160g [Populus trichocarpa]	HS901_ARATH	163	E:3e-45	RecName: Full=Heat shock protein 90-1 {ECO:0000305};^Eukaryota; Viridiplantae; Streptophyta; Embryophyta; Tracheophyta; Spermatophyta; Magnoliophyta; eudicotyledons; Gunneridae; Pentapetalae; rosids; malvids; Brassicales; Brassicaceae; Camelineae; Arabidopsis	HS901_ARATH	204	E:1e-61	RecName: Full=Heat shock protein 90-1 {ECO:0000305};^Eukaryota; Viridiplantae; Streptophyta; Embryophyta; Tracheophyta; Spermatophyta; Magnoliophyta; eudicotyledons; Gunneridae; Pentapetalae; rosids; malvids; Brassicales; Brassicaceae; Camelineae; Arabidopsis	PF00183.17	HSP90	Hsp90 protein	COG0326	Molecular chaperone. Has ATPase activity (By similarity)	.	.	.	GO:0061077|chaperone-mediated protein folding;GO:0009816|defense response to bacterium, incompatible interactionGO:0006457|protein folding;GO:0006950|response to stress	GO:0005524|ATP binding;GO:0051082|unfolded protein bindingGO:0005524|ATP binding;GO:0051082|unfolded protein binding	GO:0005737|cytoplasm
f2p19_857_31724	1.00887	9.57164e-27	up	yes	0.530597	7.28995e-09	up	no	0.197216	0.0651266	up	no	-0.147468	0.268754	down	no	0.016822	0.895012	up	no	Gene.15506::f2p19_857_transcript31724_g1::g.15506::m.15506	1-630[+]	gi|743910834|ref|XM_011050639.1|	1367	E:0	PREDICTED: Populus euphratica heat shock protein 83 (LOC105142827), transcript variant X3, mRNA	gi|743910835|ref|XP_011048941.1|	394	E:1e-128	PREDICTED: heat shock protein 83 isoform X3 [Populus euphratica]	HS906_ARATH	293	E:3e-91	RecName: Full=Heat shock protein 90-6, mitochondrial {ECO:0000305};^Eukaryota; Viridiplantae; Streptophyta; Embryophyta; Tracheophyta; Spermatophyta; Magnoliophyta; eudicotyledons; Gunneridae; Pentapetalae; rosids; malvids; Brassicales; Brassicaceae; Camelineae; Arabidopsis	HS906_ARATH	312	E:2e-99	RecName: Full=Heat shock protein 90-6, mitochondrial {ECO:0000305};^Eukaryota; Viridiplantae; Streptophyta; Embryophyta; Tracheophyta; Spermatophyta; Magnoliophyta; eudicotyledons; Gunneridae; Pentapetalae; rosids; malvids; Brassicales; Brassicaceae; Camelineae; Arabidopsis	PF00183.17	HSP90	Hsp90 protein	COG0326	Molecular chaperone. Has ATPase activity (By similarity)	.	.	.	GO:0006457|protein folding;GO:0006950|response to stressGO:0006457|protein folding;GO:0006950|response to stress	GO:0005524|ATP binding;GO:0051082|unfolded protein bindingGO:0005524|ATP binding;GO:0051082|unfolded protein binding	GO:0005618|cell wall;GO:0009570|chloroplast stroma;GO:0005739|mitochondrion
f2p59_732_13670	1.8538	4.40045e-74	up	yes	0.62486	8.44231e-08	up	no	-0.431617	0.00257866	down	no	0.155993	0.204327	up	no	0.20035	0.102231	up	no	Gene.7142::f2p59_732_transcript13670_g1::g.7142::m.7142	75-530[+]	gi|224064072|ref|XM_002301342.1|	1070	E:0	Populus trichocarpa seed maturation protein PM22 (POPTR_0002s16650g) mRNA, complete cds	gi|224064073|ref|XP_002301378.1|	300	E:1e-100	seed maturation protein PM22 [Populus trichocarpa]	LEA14_GOSHI	221	E:2e-71	RecName: Full=Late embryogenesis abundant protein Lea14-A;^Eukaryota; Viridiplantae; Streptophyta; Embryophyta; Tracheophyta; Spermatophyta; Magnoliophyta; eudicotyledons; Gunneridae; Pentapetalae; rosids; malvids; Malvales; Malvaceae; Malvoideae; Gossypium	LEA14_GOSHI	221	E:8e-73	RecName: Full=Late embryogenesis abundant protein Lea14-A;^Eukaryota; Viridiplantae; Streptophyta; Embryophyta; Tracheophyta; Spermatophyta; Magnoliophyta; eudicotyledons; Gunneridae; Pentapetalae; rosids; malvids; Malvales; Malvaceae; Malvoideae; Gossypium	PF03168.12	LEA_2	Late embryogenesis abundant protein	.	.	.	.	.	GO:0009269|response to desiccation	.	.
f2p37_1282_27056	1.63701	3.35663e-55	up	yes	2.11847	3.85533e-124	up	yes	1.82297	9.40066e-57	up	yes	1.26111	5.55013e-12	up	yes	1.26324	3.00338e-21	up	yes	Gene.13564::f2p37_1282_transcript27056_g1::g.13564::m.13564	183-1124[+]	gi|566188479|ref|XM_002314296.2|	1993	E:0	Populus trichocarpa hypothetical protein (POPTR_0010s00500g) mRNA, complete cds	gi|566188480|ref|XP_002314332.2|	327	E:3e-106	hypothetical protein POPTR_0010s00500g [Populus trichocarpa]	LEA29_GOSHI	85.1	E:4e-17	RecName: Full=Late embryogenesis abundant protein D-29;^Eukaryota; Viridiplantae; Streptophyta; Embryophyta; Tracheophyta; Spermatophyta; Magnoliophyta; eudicotyledons; Gunneridae; Pentapetalae; rosids; malvids; Malvales; Malvaceae; Malvoideae; Gossypium	LEA29_GOSHI	120	E:4e-30	RecName: Full=Late embryogenesis abundant protein D-29;^Eukaryota; Viridiplantae; Streptophyta; Embryophyta; Tracheophyta; Spermatophyta; Magnoliophyta; eudicotyledons; Gunneridae; Pentapetalae; rosids; malvids; Malvales; Malvaceae; Malvoideae; Gossypium	PF01442.17	Apolipoprotein	Apolipoprotein A1/A4/E domain	.	.	.	ExpAA=21.01^PredHel=1^Topology=i12-34o	.	GO:0006869|lipid transport;GO:0042157|lipoprotein metabolic process	GO:0008289|lipid binding	GO:0005576|extracellular region
f9p60_852_12520	2.20277	1.93694e-07	up	yes	6.90004	6.83624e-156	up	yes	0.152033	0.699478	up	no	0.724272	0.0310816	up	no	0.705794	0.0338018	up	no	Gene.6786::f9p60_852_transcript12520_g1::g.6786::m.6786	59-592[+]	gi|566208680|ref|XM_006373677.1|	1312	E:0	Populus trichocarpa hypothetical protein (POPTR_0016s04570g) mRNA, complete cds	gi|566208681|ref|XP_006373739.1|	248	E:4e-79	hypothetical protein POPTR_0016s04570g [Populus trichocarpa]	PM1_SOYBN	108	E:8e-27	RecName: Full=18 kDa seed maturation protein;^Eukaryota; Viridiplantae; Streptophyta; Embryophyta; Tracheophyta; Spermatophyta; Magnoliophyta; eudicotyledons; Gunneridae; Pentapetalae; rosids; fabids; Fabales; Fabaceae; Papilionoideae; Phaseoleae; Glycine; Soja	PM1_SOYBN	138	E:2e-39	RecName: Full=18 kDa seed maturation protein;^Eukaryota; Viridiplantae; Streptophyta; Embryophyta; Tracheophyta; Spermatophyta; Magnoliophyta; eudicotyledons; Gunneridae; Pentapetalae; rosids; fabids; Fabales; Fabaceae; Papilionoideae; Phaseoleae; Glycine; Soja	PF03760.14	LEA_1	Late embryogenesis abundant (LEA) group 1	ENOG410YTH0	18 kDa seed maturation	.	.	.	GO:0009793|embryo development ending in seed dormancyGO:0009793|embryo development ending in seed dormancy	GO:0048030|disaccharide binding;GO:0070492|oligosaccharide binding;GO:0031210|phosphatidylcholine binding	.
f2p60_714_33720	1.14056	0.0179554	up	yes	0.372978	0.44732	up	no	0.266064	0.492571	up	no	0.675663	0.0430722	up	no	0.162985	0.620143	up	no	.	.	gi|743934591|ref|XM_011013338.1|	828	E:0	PREDICTED: Populus euphratica protein YLS9-like (LOC105116129), mRNA	gi|224138358|ref|XP_002322794.1|	154	E:6e-43	harpin-induced family protein [Populus trichocarpa]	NHL1_ARATH	105	E:4e-26	RecName: Full=NDR1/HIN1-like protein 1 {ECO:0000303|Ref.1};^Eukaryota; Viridiplantae; Streptophyta; Embryophyta; Tracheophyta; Spermatophyta; Magnoliophyta; eudicotyledons; Gunneridae; Pentapetalae; rosids; malvids; Brassicales; Brassicaceae; Camelineae; Arabidopsis	.	.	.	.	.	.	.	ENOG41119PU	Late embryogenesis abundant protein	.	.	.	GO:0051607|defense response to virus	GO:0004871|signal transducer activity	GO:0046658|anchored component of plasma membrane;GO:0016021|integral component of membrane;GO:0009506|plasmodesma
f2p60_1056_29458	-0.449981	5.53619e-07	down	no	-0.956208	8.70574e-29	down	no	-0.926775	1.60005e-23	down	no	-1.11781	2.03867e-19	down	yes	-1.25673	9.23454e-11	down	yes	Gene.14598::f2p60_1056_transcript29458_g6::g.14598::m.14598	3-767[+]	gi|566177533|ref|XM_002308405.2|	1683	E:0	Populus trichocarpa syringolide-induced protein B13-1-9 (POPTR_0006s22070g) mRNA, complete cds	gi|566177534|ref|XP_002308441.2|	428	E:1e-148	syringolide-induced protein B13-1-9 [Populus trichocarpa]	NHL10_ARATH	209	E:8e-64	RecName: Full=NDR1/HIN1-like protein 10 {ECO:0000303|PubMed:14666423};^Eukaryota; Viridiplantae; Streptophyta; Embryophyta; Tracheophyta; Spermatophyta; Magnoliophyta; eudicotyledons; Gunneridae; Pentapetalae; rosids; malvids; Brassicales; Brassicaceae; Camelineae; Arabidopsis	NHL10_ARATH	226	E:4e-72	RecName: Full=NDR1/HIN1-like protein 10 {ECO:0000303|PubMed:14666423};^Eukaryota; Viridiplantae; Streptophyta; Embryophyta; Tracheophyta; Spermatophyta; Magnoliophyta; eudicotyledons; Gunneridae; Pentapetalae; rosids; malvids; Brassicales; Brassicaceae; Camelineae; Arabidopsis	PF03168.12	LEA_2	Late embryogenesis abundant protein	ENOG410YGQV	harpin-induced protein 1 domain containing protein, expressed	.	ExpAA=38.30^PredHel=1^Topology=i73-95o	.	GO:0051607|defense response to virus;GO:0010150|leaf senescence;GO:0051707|response to other organism	GO:0004871|signal transducer activity	GO:0046658|anchored component of plasma membrane;GO:0009507|chloroplast;GO:0016021|integral component of membrane;GO:0009506|plasmodesma
f2p60_1097_10282	-1.034	2.71397e-29	down	yes	-0.805859	1.03174e-22	down	no	0.0485693	0.515563	up	no	-0.225765	NA	down	no	-0.489054	0.00056917	down	no	Gene.5976::f2p60_1097_transcript10282_g2::g.5976::m.5976	2-748[+]	gi|566188268|ref|XM_002313579.2|	1823	E:0	Populus trichocarpa harpin-induced family protein (POPTR_0009s16050g) mRNA, complete cds	gi|224104907|ref|XP_002313615.1|	320	E:5e-105	harpin-induced family protein [Populus trichocarpa]	NHL13_ARATH	176	E:6e-62	RecName: Full=NDR1/HIN1-like protein 13 {ECO:0000303|PubMed:26206852};^Eukaryota; Viridiplantae; Streptophyta; Embryophyta; Tracheophyta; Spermatophyta; Magnoliophyta; eudicotyledons; Gunneridae; Pentapetalae; rosids; malvids; Brassicales; Brassicaceae; Camelineae; Arabidopsis	NHL13_ARATH	220	E:2e-69	RecName: Full=NDR1/HIN1-like protein 13 {ECO:0000303|PubMed:26206852};^Eukaryota; Viridiplantae; Streptophyta; Embryophyta; Tracheophyta; Spermatophyta; Magnoliophyta; eudicotyledons; Gunneridae; Pentapetalae; rosids; malvids; Brassicales; Brassicaceae; Camelineae; Arabidopsis	PF03168.12	LEA_2	Late embryogenesis abundant protein	ENOG410YIDD	Harpin-induced protein 1 containing protein, expressed	.	ExpAA=23.49^PredHel=1^Topology=i128-150o	.	GO:0042742|defense response to bacterium	.	GO:0016021|integral component of membrane;GO:0005886|plasma membrane;GO:0009506|plasmodesma
f2p49_1099_29072	1.24422	8.4167e-60	up	yes	1.57659	6.45846e-115	up	yes	1.43497	6.16226e-80	up	yes	1.02329	1.09988e-17	up	yes	0.236637	0.0224932	up	no	Gene.14440::f2p49_1099_transcript29072_g1::g.14440::m.14440	3-833[+]	gi|566198192|ref|XM_002318763.2|	1820	E:0	Populus trichocarpa NDR1/HIN1-LIKE 25 family protein (POPTR_0012s12790g) mRNA, complete cds	gi|566198193|ref|XP_002318799.2|	443	E:2e-153	NDR1/HIN1-LIKE 25 family protein [Populus trichocarpa]	NHL6_ARATH	224	E:3e-69	RecName: Full=NDR1/HIN1-like protein 6 {ECO:0000303|PubMed:26849212};^Eukaryota; Viridiplantae; Streptophyta; Embryophyta; Tracheophyta; Spermatophyta; Magnoliophyta; eudicotyledons; Gunneridae; Pentapetalae; rosids; malvids; Brassicales; Brassicaceae; Camelineae; Arabidopsis	NHL6_ARATH	276	E:5e-91	RecName: Full=NDR1/HIN1-like protein 6 {ECO:0000303|PubMed:26849212};^Eukaryota; Viridiplantae; Streptophyta; Embryophyta; Tracheophyta; Spermatophyta; Magnoliophyta; eudicotyledons; Gunneridae; Pentapetalae; rosids; malvids; Brassicales; Brassicaceae; Camelineae; Arabidopsis	PF03168.12	LEA_2	Late embryogenesis abundant protein	ENOG410YFY3	harpin-induced protein 1 domain containing protein, expressed	.	ExpAA=23.42^PredHel=1^Topology=i90-112o	.	GO:0009738|abscisic acid-activated signaling pathway;GO:0010116|positive regulation of abscisic acid biosynthetic process;GO:0009737|response to abscisic acid;GO:0006970|response to osmotic stress;GO:1902074|response to salt	.	GO:0005829|cytosol;GO:0016021|integral component of membrane;GO:0005886|plasma membrane
f13p60_601_14927	3.01669	0	up	yes	1.5923	9.93743e-165	up	yes	1.03663	2.43592e-28	up	yes	1.07765	3.9033e-49	up	yes	0.76855	2.20273e-06	up	no	.	.	gi|118487899|gb|EF147769.1|	1002	E:0	Populus trichocarpa clone WS0124_O15 unknown mRNA	gi|566213348|ref|XP_006373502.1|	145	E:1e-41	ABA-inducible family protein [Populus trichocarpa]	.	.	.	.	.	.	.	.	.	.	.	.	.	.	.	.	.	.	.
f2p45_1593_6461	0.735822	0.00246882	up	no	3.82383	4.39439e-162	up	yes	0.367443	0.11425	up	no	0.779493	0.00181896	up	no	0.750795	0.000703292	up	no	Gene.4303::f2p45_1593_transcript6461_g1::g.4303::m.4303	124-1398[+]	gi|743919414|ref|XM_011005428.1|	2599	E:0	PREDICTED: Populus euphratica late embryogenesis abundant protein D-29-like (LOC105110396), transcript variant X2, mRNA	gi|743919415|ref|XP_011003730.1|	731	E:0	PREDICTED: embryonic protein DC-8-like isoform X2 [Populus euphratica]	LEA29_GOSHI	65.9	E:2e-10	RecName: Full=Late embryogenesis abundant protein D-29;^Eukaryota; Viridiplantae; Streptophyta; Embryophyta; Tracheophyta; Spermatophyta; Magnoliophyta; eudicotyledons; Gunneridae; Pentapetalae; rosids; malvids; Malvales; Malvaceae; Malvoideae; Gossypium	LEA29_GOSHI	66.2	E:8e-11	RecName: Full=Late embryogenesis abundant protein D-29;^Eukaryota; Viridiplantae; Streptophyta; Embryophyta; Tracheophyta; Spermatophyta; Magnoliophyta; eudicotyledons; Gunneridae; Pentapetalae; rosids; malvids; Malvales; Malvaceae; Malvoideae; Gossypium	PF01442.17	Apolipoprotein	Apolipoprotein A1/A4/E domain	.	.	.	.	.	GO:0006869|lipid transport;GO:0042157|lipoprotein metabolic process	GO:0008289|lipid binding	GO:0005576|extracellular region
f2p10_527_36146	-1.73564	1.85793e-10	down	yes	-2.45404	1.89667e-19	down	yes	-1.0125	1.45275e-05	down	yes	-0.948413	0.000353016	down	no	0.0279804	0.913644	up	no	.	.	gi|118483920|gb|EF145714.1|	484	E:1e-133	Populus trichocarpa clone WS0112_O05 unknown mRNA	gi|224110412|ref|XP_002315512.1|	101	E:8e-25	hypothetical protein POPTR_0010s01590g [Populus trichocarpa]	LEA5_CITSI	74.7	E:4e-16	RecName: Full=Late embryogenesis abundant protein Lea5;^Eukaryota; Viridiplantae; Streptophyta; Embryophyta; Tracheophyta; Spermatophyta; Magnoliophyta; eudicotyledons; Gunneridae; Pentapetalae; rosids; malvids; Sapindales; Rutaceae; Aurantioideae; Citrus	.	.	.	.	.	.	.	.	.	.	.	.	GO:0006950|response to stress	.	.
f3p60_781_32678	-2.19017	3.39418e-213	down	yes	-1.91454	7.25483e-214	down	yes	-0.535006	6.60538e-15	down	no	-0.402493	9.51811e-05	down	no	0.367788	0.0149266	up	no	Gene.15871::f3p60_781_transcript32678_g1::g.15871::m.15871	144-464[+]	gi|566188644|ref|XM_002315476.2|	1026	E:0	Populus trichocarpa hypothetical protein (POPTR_0010s01590g) mRNA, complete cds	gi|224110412|ref|XP_002315512.1|	183	E:2e-55	hypothetical protein POPTR_0010s01590g [Populus trichocarpa]	LEA5_CITSI	101	E:2e-25	RecName: Full=Late embryogenesis abundant protein Lea5;^Eukaryota; Viridiplantae; Streptophyta; Embryophyta; Tracheophyta; Spermatophyta; Magnoliophyta; eudicotyledons; Gunneridae; Pentapetalae; rosids; malvids; Sapindales; Rutaceae; Aurantioideae; Citrus	LEA5_CITSI	113	E:1e-31	RecName: Full=Late embryogenesis abundant protein Lea5;^Eukaryota; Viridiplantae; Streptophyta; Embryophyta; Tracheophyta; Spermatophyta; Magnoliophyta; eudicotyledons; Gunneridae; Pentapetalae; rosids; malvids; Sapindales; Rutaceae; Aurantioideae; Citrus	PF03242.12	LEA_3	Late embryogenesis abundant protein	.	.	.	.	.	GO:0006950|response to stressGO:0006950|response to stress	.	.
f29p60_719_13862	-1.97035	3.73829e-178	down	yes	-2.2292	3.47216e-44	down	yes	-1.12024	8.03474e-48	down	yes	-0.986037	1.59355e-24	down	no	0.0403922	0.779973	up	no	Gene.7191::f29p60_719_transcript13862_g1::g.7191::m.7191	147-467[+]	gi|566188644|ref|XM_002315476.2|	987	E:0	Populus trichocarpa hypothetical protein (POPTR_0010s01590g) mRNA, complete cds	gi|224110412|ref|XP_002315512.1|	183	E:1e-55	hypothetical protein POPTR_0010s01590g [Populus trichocarpa]	LEA5_CITSI	101	E:1e-25	RecName: Full=Late embryogenesis abundant protein Lea5;^Eukaryota; Viridiplantae; Streptophyta; Embryophyta; Tracheophyta; Spermatophyta; Magnoliophyta; eudicotyledons; Gunneridae; Pentapetalae; rosids; malvids; Sapindales; Rutaceae; Aurantioideae; Citrus	LEA5_CITSI	113	E:1e-31	RecName: Full=Late embryogenesis abundant protein Lea5;^Eukaryota; Viridiplantae; Streptophyta; Embryophyta; Tracheophyta; Spermatophyta; Magnoliophyta; eudicotyledons; Gunneridae; Pentapetalae; rosids; malvids; Sapindales; Rutaceae; Aurantioideae; Citrus	PF03242.12	LEA_3	Late embryogenesis abundant protein	.	.	.	.	.	GO:0006950|response to stressGO:0006950|response to stress	.	.
f2p60_765_32980	-1.58416	9.65705e-143	down	yes	-2.54523	0	down	yes	-1.68782	1.48531e-115	down	yes	-1.97495	1.30971e-44	down	yes	-1.31125	2.44688e-26	down	yes	Gene.15968::f2p60_765_transcript32980_g7::g.15968::m.15968	2-436[+]	gi|743791697|ref|XM_011043749.1|	1197	E:0	PREDICTED: Populus euphratica indole-3-acetic acid-induced protein ARG2-like (LOC105137848), mRNA	gi|566203909|ref|XP_002321000.2|	236	E:8e-76	hypothetical protein POPTR_0014s12250g, partial [Populus trichocarpa]	SAG21_ARATH	76.6	E:2e-16	RecName: Full=Protein SENESCENCE-ASSOCIATED GENE 21, mitochondrial {ECO:0000303|PubMed:9617813};^Eukaryota; Viridiplantae; Streptophyta; Embryophyta; Tracheophyta; Spermatophyta; Magnoliophyta; eudicotyledons; Gunneridae; Pentapetalae; rosids; malvids; Brassicales; Brassicaceae; Camelineae; Arabidopsis	SAG21_ARATH	76.6	E:4e-17	RecName: Full=Protein SENESCENCE-ASSOCIATED GENE 21, mitochondrial {ECO:0000303|PubMed:9617813};^Eukaryota; Viridiplantae; Streptophyta; Embryophyta; Tracheophyta; Spermatophyta; Magnoliophyta; eudicotyledons; Gunneridae; Pentapetalae; rosids; malvids; Brassicales; Brassicaceae; Camelineae; Arabidopsis	PF03242.12	LEA_3	Late embryogenesis abundant protein	ENOG410ZEWF	late embryogenesis abundant protein	.	.	.	GO:0042631|cellular response to water deprivation;GO:0006952|defense response;GO:0010150|leaf senescence;GO:1900424|regulation of defense response to bacterium;GO:1900150|regulation of defense response to fungus;GO:1900055|regulation of leaf senescence;GO:2000028|regulation of photoperiodism, flowering;GO:0009737|response to abscisic acid;GO:0009646|response to absence of light;GO:0009409|respons…	.	GO:0005739|mitochondrion
f4p60_925_30958	1.02514	5.64889e-26	up	yes	-0.0169462	0.870062	down	no	0.308925	0.00878349	up	no	0.389126	0.0294445	up	no	-0.184207	0.252017	down	no	.	.	gi|743930374|ref|XM_011011133.1|	852	E:0	PREDICTED: Populus euphratica indole-3-acetic acid-induced protein ARG2 (LOC105114556), mRNA	gi|566159101|ref|XP_002301483.2|	170	E:8e-56	hypothetical protein POPTR_0002s20480g, partial [Populus trichocarpa]	SAG21_ARATH	73.6	E:4e-15	RecName: Full=Protein SENESCENCE-ASSOCIATED GENE 21, mitochondrial {ECO:0000303|PubMed:9617813};^Eukaryota; Viridiplantae; Streptophyta; Embryophyta; Tracheophyta; Spermatophyta; Magnoliophyta; eudicotyledons; Gunneridae; Pentapetalae; rosids; malvids; Brassicales; Brassicaceae; Camelineae; Arabidopsis	.	.	.	.	.	.	.	ENOG410ZEWF	late embryogenesis abundant protein	.	.	.	GO:0042631|cellular response to water deprivation;GO:0006952|defense response;GO:0010150|leaf senescence;GO:1900424|regulation of defense response to bacterium;GO:1900150|regulation of defense response to fungus;GO:1900055|regulation of leaf senescence;GO:2000028|regulation of photoperiodism, flowering;GO:0009737|response to abscisic acid;GO:0009646|response to absence of light;GO:0009409|respons…	.	GO:0005739|mitochondrion
f3p60_541_15665	2.07058	1.1247e-09	up	yes	1.60495	3.86307e-06	up	yes	1.47618	2.18251e-06	up	yes	1.0513	0.000511217	up	yes	1.0537	0.000650842	up	yes	.	.	gi|566199676|ref|XM_006375849.1|	536	E:3e-149	Populus trichocarpa hypothetical protein (POPTR_0013s05900g) mRNA, complete cds	.	.	.	.	.	.	.	.	.	.	.	.	.	.	.	.	.	.	.	.	.	.	.
f2p60_651_345120	1.85104	4.82126e-102	up	yes	1.32903	1.73579e-58	up	yes	1.31087	3.24349e-34	up	yes	0.890141	9.60221e-13	up	no	0.906521	1.69694e-16	up	no	Gene.16382::f2p60_651_transcript34512_g10::g.16382::m.16382	2-355[+]	gi|566199676|ref|XM_006375849.1|	603	E:3e-169	Populus trichocarpa hypothetical protein (POPTR_0013s05900g) mRNA, complete cds	gi|743873119|ref|XP_011034314.1|	79.3	E:5e-16	PREDICTED: dehydrin DHN3 [Populus euphratica]	.	.	.	.	SRC1_SOYBN	53.1	E:8e-09	RecName: Full=Protein SRC1 {ECO:0000305};^Eukaryota; Viridiplantae; Streptophyta; Embryophyta; Tracheophyta; Spermatophyta; Magnoliophyta; eudicotyledons; Gunneridae; Pentapetalae; rosids; fabids; Fabales; Fabaceae; Papilionoideae; Phaseoleae; Glycine; Soja	.	.	.	ENOG41106RW	NA	.	.	.	.	GO:0046872|metal ion binding	.
f3p60_1235_27073	1.15384	3.99306e-137	up	yes	-0.147188	0.0137938	down	no	0.113691	0.0201182	up	no	0.0478654	0.269904	up	no	0.0601846	0.406195	up	no	Gene.13584::f3p60_1235_transcript27073_g2::g.13584::m.13584	473-799[+]	gi|118485481|gb|EF146529.1|	1938	E:0	Populus trichocarpa clone WS0118_O23 unknown mRNA	gi|118483292|gb|ABK93548.1|	154	E:2e-42	unknown [Populus trichocarpa]	ERD14_ARATH	50.8	E:4e-06	RecName: Full=Dehydrin ERD14;^Eukaryota; Viridiplantae; Streptophyta; Embryophyta; Tracheophyta; Spermatophyta; Magnoliophyta; eudicotyledons; Gunneridae; Pentapetalae; rosids; malvids; Brassicales; Brassicaceae; Camelineae; Arabidopsis	ECP44_DAUCA	73.6	E:1e-15	RecName: Full=Phosphoprotein ECPP44;^Eukaryota; Viridiplantae; Streptophyta; Embryophyta; Tracheophyta; Spermatophyta; Magnoliophyta; eudicotyledons; Gunneridae; Pentapetalae; asterids; campanulids; Apiales; Apiaceae; Apioideae; Scandiceae; Daucinae; Daucus; Daucus sect. Daucus	PF00257.18	Dehydrin	Dehydrin	.	.	.	.	.	GO:0006950|response to stress;GO:0009415|response to waterGO:0006950|response to stress;GO:0009415|response to water	.	.
f2p60_1369_7946	3.5085	5.81646e-142	up	yes	2.50198	2.78867e-55	up	yes	1.20579	1.70443e-09	up	yes	1.48161	NA	up	no	1.61345	1.07599e-09	up	yes	Gene.4991::f2p60_1369_transcript7946_g1::g.4991::m.4991	16-1158[-]	gi|166091645|gb|AC216914.1|	797	E:0	Populus trichocarpa clone POP036-E01, complete sequence	gi|743873115|ref|XP_011034313.1|	196	E:4e-56	PREDICTED: dehydrin Rab18-like [Populus euphratica]	SRC1_SOYBN	52.4	E:6e-07	RecName: Full=Protein SRC1 {ECO:0000305};^Eukaryota; Viridiplantae; Streptophyta; Embryophyta; Tracheophyta; Spermatophyta; Magnoliophyta; eudicotyledons; Gunneridae; Pentapetalae; rosids; fabids; Fabales; Fabaceae; Papilionoideae; Phaseoleae; Glycine; Soja	.	.	.	.	.	.	.	.	.	.	ExpAA=170.42^PredHel=8^Topology=o5-27i48-70o80-102i128-150o189-208i229-251o278-300i332-354o	.	.	.	.
f8p60_825_32305	2.13365	6.98504e-276	up	yes	1.67098	2.11353e-166	up	yes	1.59003	7.30696e-73	up	yes	1.34266	5.43263e-33	up	yes	1.32039	4.66212e-32	up	yes	Gene.15739::f8p60_825_transcript32305_g1::g.15739::m.15739	2-484[+]	gi|566199676|ref|XM_006375849.1|	601	E:2e-168	Populus trichocarpa hypothetical protein (POPTR_0013s05900g) mRNA, complete cds	gi|566199675|ref|XP_006375910.1|	150	E:1e-41	hypothetical protein POPTR_0013s05890g [Populus trichocarpa]	SRC1_SOYBN	52	E:2e-07	RecName: Full=Protein SRC1 {ECO:0000305};^Eukaryota; Viridiplantae; Streptophyta; Embryophyta; Tracheophyta; Spermatophyta; Magnoliophyta; eudicotyledons; Gunneridae; Pentapetalae; rosids; fabids; Fabales; Fabaceae; Papilionoideae; Phaseoleae; Glycine; Soja	SRC1_SOYBN	52.4	E:3e-08	RecName: Full=Protein SRC1 {ECO:0000305};^Eukaryota; Viridiplantae; Streptophyta; Embryophyta; Tracheophyta; Spermatophyta; Magnoliophyta; eudicotyledons; Gunneridae; Pentapetalae; rosids; fabids; Fabales; Fabaceae; Papilionoideae; Phaseoleae; Glycine; Soja	.	.	.	ENOG41106RW	NA	.	.	.	.	GO:0046872|metal ion binding	.
[truncated: 2 more columns]
