# Supplementary material for: Characterization of the Gene Expression Profile Response to Drought Stress in Populus ussuriensis Using PacBio SMRT and Illumina Sequencing
Source: Int J Mol Sci. 2022 Mar 30;23(7):3840. doi: 10.3390/ijms23073840 (PMC8998571; doi:10.3390/ijms23073840)
Supplement: Supplementary file 1 [file ijms-23-03840-s001.zip › Table S11.xls]

## Sheet: Sheet1
Table S11 DEGs related to lignin biosynthetic process in Populus ussuriensis
geneID	6h Log2FoldChange	pval	Up/Down	Significant	12h Log2FoldChange	pval	Up/Down	Significant	24h Log2FoldChange	pval	Up/Down	Significant	48h Log2FoldChange	pval	Up/Down	Significant	120h Log2FoldChange	pval	Up/Down	Significant	Prot_ID	Prot_Coords	NT_TopHit	NT_Score	NT_Evalue	NT_Description	NR_TopHit	NR_Score	NR_Evalue	NR_Description	BLASTX_Sprot_TopHit	BLASTX_Score	BLASTX_Evalue	BLASTX_Description	BLASTP_Sprot_TopHit	BLASTP_Score	BLASTP_Evalue	BLASTP_Description	PFAM_TopHit	PFAM_Name	PFAM_Description	eggNOG_TopHit	eggNOG_Description	SignalP	TmHMM	RNAMMER	GO_biological_process	GO_molecular_function	GO_cellular_component
f3p60_1224_9210	4.2197	4.73659e-128	up	yes	3.88851	1.2044e-110	up	yes	3.35758	2.7252e-77	up	yes	1.79468	3.18413e-13	up	yes	1.29453	1.73485e-08	up	yes	Gene.5533::PuPacbio_f3p60_1224_transcript9210_g2::g.5533::m.5533	87-770[+]	gi|566170461|ref|XM_002307154.2|	2134	E:0	Populus trichocarpa hypothetical protein (POPTR_0005s09930g) mRNA, complete cds	gi|224083966|ref|XP_002307190.1|	346	E:0	hypothetical protein POPTR_0005s09930g [Populus trichocarpa]	MYB58_ARATH	228	E:8e-70	RecName: Full=Transcription factor MYB58 {ECO:0000303|PubMed:11597504};^Eukaryota; Viridiplantae; Streptophyta; Embryophyta; Tracheophyta; Spermatophyta; Magnoliophyta; eudicotyledons; Gunneridae; Pentapetalae; rosids; malvids; Brassicales; Brassicaceae; Camelineae; Arabidopsis	MYB58_ARATH	237	E:4e-76	RecName: Full=Transcription factor MYB58 {ECO:0000303|PubMed:11597504};^Eukaryota; Viridiplantae; Streptophyta; Embryophyta; Tracheophyta; Spermatophyta; Magnoliophyta; eudicotyledons; Gunneridae; Pentapetalae; rosids; malvids; Brassicales; Brassicaceae; Camelineae; Arabidopsis	PF00249.30	Myb_DNA-binding	Myb-like DNA-binding domain	COG5147	Myblike DNAbinding domain containing protein	.	.	.	GO:0030154|cell differentiation;GO:0009809|lignin biosynthetic process;GO:0045893|positive regulation of transcription, DNA-templated;GO:2000652|regulation of secondary cell wall biogenesis;GO:0006357|regulation of transcription from RNA polymerase II promoter;GO:0009416|response to light stimulus;GO:0006351|transcription, DNA-templated	GO:0000981|RNA polymerase II transcription factor activity, sequence-specific DNA binding;GO:0043565|sequence-specific DNA binding;GO:0001135|transcription factor activity, RNA polymerase II transcription factor recruiting;GO:0003700|transcription factor activity, sequence-specific DNA binding;GO:0044212|transcription regulatory region DNA binding	GO:0005634|nucleus
f2p39_1327_8327	-0.94507	6.8385e-61	down	no	-0.224405	1.13573e-05	down	no	-0.518635	8.96752e-14	down	no	-0.488565	NA	down	no	-1.16975	2.40869e-30	down	yes	Gene.5148::PuPacbio_f2p39_1327_transcript8327_g1::g.5148::m.5148	103-1107[+]	gi|566181122|ref|XM_002310238.2|	2257	E:0	Populus trichocarpa Peroxidase 49 precursor family protein (POPTR_0007s13420g) mRNA, complete cds	gi|591403368|gb|AHL39156.1|	613	E:0	class III peroxidase [Populus trichocarpa]	PER72_ARATH	516	E:0	RecName: Full=Peroxidase 72;^Eukaryota; Viridiplantae; Streptophyta; Embryophyta; Tracheophyta; Spermatophyta; Magnoliophyta; eudicotyledons; Gunneridae; Pentapetalae; rosids; malvids; Brassicales; Brassicaceae; Camelineae; Arabidopsis	PER72_ARATH	546	E:0	RecName: Full=Peroxidase 72;^Eukaryota; Viridiplantae; Streptophyta; Embryophyta; Tracheophyta; Spermatophyta; Magnoliophyta; eudicotyledons; Gunneridae; Pentapetalae; rosids; malvids; Brassicales; Brassicaceae; Camelineae; Arabidopsis	PF00141.22	peroxidase	Peroxidase	ENOG410YA1B	peroxidase	.	ExpAA=19.97^PredHel=1^Topology=i5-24o	.	GO:0042744|hydrogen peroxide catabolic process;GO:0009809|lignin biosynthetic process;GO:0006979|response to oxidative stressGO:0006979|response to oxidative stress;GO:0055114|oxidation-reduction process	GO:0020037|heme binding;GO:0046872|metal ion binding;GO:0004601|peroxidase activityGO:0004601|peroxidase activity;GO:0020037|heme binding	GO:0005576|extracellular region
f2p54_2528_20310	-1.08092	2.58466e-88	down	yes	-0.462194	1.14387e-13	down	no	-0.459081	5.62934e-11	down	no	-0.0448409	0.526376	down	no	-0.763916	1.34332e-12	down	no	Gene.9696::PuPacbio_f2p54_2528_transcript20310_g1::g.9696::m.9696	120-2267[+]	gi|566209468|ref|XM_002322848.2|	4394	E:0	Populus trichocarpa phenylalanine ammonia-lyase family protein (POPTR_0016s09230g) mRNA, complete cds	gi|566209469|ref|XP_002322884.2|	1476	E:0	phenylalanine ammonia-lyase family protein [Populus trichocarpa]	PALY_POPTR	1475	E:0	RecName: Full=Phenylalanine ammonia-lyase;^Eukaryota; Viridiplantae; Streptophyta; Embryophyta; Tracheophyta; Spermatophyta; Magnoliophyta; eudicotyledons; Gunneridae; Pentapetalae; rosids; fabids; Malpighiales; Salicaceae; Saliceae; Populus	PALY_POPTR	1475	E:0	RecName: Full=Phenylalanine ammonia-lyase;^Eukaryota; Viridiplantae; Streptophyta; Embryophyta; Tracheophyta; Spermatophyta; Magnoliophyta; eudicotyledons; Gunneridae; Pentapetalae; rosids; fabids; Malpighiales; Salicaceae; Saliceae; Populus	PF00221.18	Lyase_aromatic	Aromatic amino acid lyase	COG2986	histidine ammonia-lyase	.	.	.	GO:0009800|cinnamic acid biosynthetic process;GO:0006559|L-phenylalanine catabolic process	GO:0045548|phenylalanine ammonia-lyase activity	GO:0005737|cytoplasm
f2p60_1466_7341	1.64424	3.04082e-183	up	yes	1.77461	6.35129e-257	up	yes	1.60774	3.03292e-143	up	yes	1.21781	8.55421e-57	up	yes	0.866453	1.74747e-39	up	no	Gene.4725::PuPacbio_f2p60_1466_transcript7341_g5::g.4725::m.4725	130-1146[+]	gi|183585174|gb|EU603310.1|	2414	E:0	Populus trichocarpa isolate CCR2 cinnamoyl CoA reductase mRNA, complete cds	gi|190710713|gb|ACE95172.1|	653	E:0	cinnamoyl-CoA reductase [Populus tomentosa]	CCR1_ARATH	506	E:2e-176	RecName: Full=Cinnamoyl-CoA reductase 1;^Eukaryota; Viridiplantae; Streptophyta; Embryophyta; Tracheophyta; Spermatophyta; Magnoliophyta; eudicotyledons; Gunneridae; Pentapetalae; rosids; malvids; Brassicales; Brassicaceae; Camelineae; Arabidopsis	CCR1_ARATH	523	E:0	RecName: Full=Cinnamoyl-CoA reductase 1;^Eukaryota; Viridiplantae; Streptophyta; Embryophyta; Tracheophyta; Spermatophyta; Magnoliophyta; eudicotyledons; Gunneridae; Pentapetalae; rosids; malvids; Brassicales; Brassicaceae; Camelineae; Arabidopsis	PF01370.20	Epimerase	NAD dependent epimerase/dehydratase family	COG0451	Nad-dependent epimerase dehydratase	.	.	.	GO:0007623|circadian rhythm;GO:0009809|lignin biosynthetic process;GO:0009409|response to coldGO:0006694|steroid biosynthetic process;GO:0055114|oxidation-reduction process	GO:0016621|cinnamoyl-CoA reductase activity;GO:0050662|coenzyme bindingGO:0003824|catalytic activity;GO:0050662|coenzyme binding;GO:0003854|3-beta-hydroxy-delta5-steroid dehydrogenase activity;GO:0016616|oxidoreductase activity, acting on the CH-OH group of donors, NAD or NADP as acceptor	GO:0005829|cytosol
f2p60_1499_25217	2.69622	0	up	yes	2.13183	0	up	yes	1.04886	1.40992e-54	up	yes	0.344154	NA	up	no	-0.393284	1.45913e-05	down	no	Gene.12697::PuPacbio_f2p60_1499_transcript25217_g5::g.12697::m.12697	120-1184[+]	gi|743896043|ref|XM_011042996.1|	2368	E:0	PREDICTED: Populus euphratica probable cinnamyl alcohol dehydrogenase 1 (LOC105137298), mRNA	gi|743896044|ref|XP_011041298.1|	671	E:0	PREDICTED: probable cinnamyl alcohol dehydrogenase 1 [Populus euphratica]	CADH1_ARATH	491	E:3e-170	RecName: Full=Probable cinnamyl alcohol dehydrogenase 1;^Eukaryota; Viridiplantae; Streptophyta; Embryophyta; Tracheophyta; Spermatophyta; Magnoliophyta; eudicotyledons; Gunneridae; Pentapetalae; rosids; malvids; Brassicales; Brassicaceae; Camelineae; Arabidopsis	CADH1_ARATH	514	E:0	RecName: Full=Probable cinnamyl alcohol dehydrogenase 1;^Eukaryota; Viridiplantae; Streptophyta; Embryophyta; Tracheophyta; Spermatophyta; Magnoliophyta; eudicotyledons; Gunneridae; Pentapetalae; rosids; malvids; Brassicales; Brassicaceae; Camelineae; Arabidopsis	PF08240.11	ADH_N	Alcohol dehydrogenase GroES-like domain	COG1064	alcohol dehydrogenase	.	.	.	GO:0009809|lignin biosynthetic processGO:0055114|oxidation-reduction process	GO:0045551|cinnamyl-alcohol dehydrogenase activity;GO:0052747|sinapyl alcohol dehydrogenase activity;GO:0008270|zinc ion binding	GO:0005829|cytosol
f2p60_1827_22987	1.40823	3.05829e-46	up	yes	1.96589	1.6827e-118	up	yes	1.163	2.44658e-29	up	yes	0.840189	1.343e-13	up	no	0.520171	9.87097e-06	up	no	Gene.11468::PuPacbio_f2p60_1827_transcript22987_g4::g.11468::m.11468	1-1278[+]	gi|566208408|ref|XM_006373625.1|	3099	E:0	Populus trichocarpa hypothetical protein (POPTR_0016s03090g) mRNA, complete cds	gi|566208407|ref|XP_002323218.2|	793	E:0	hypothetical protein POPTR_0016s03090g [Populus trichocarpa]	C98A2_SOYBN	669	E:0	RecName: Full=Cytochrome P450 98A2;^Eukaryota; Viridiplantae; Streptophyta; Embryophyta; Tracheophyta; Spermatophyta; Magnoliophyta; eudicotyledons; Gunneridae; Pentapetalae; rosids; fabids; Fabales; Fabaceae; Papilionoideae; Phaseoleae; Glycine; Soja	C98A2_SOYBN	681	E:0	RecName: Full=Cytochrome P450 98A2;^Eukaryota; Viridiplantae; Streptophyta; Embryophyta; Tracheophyta; Spermatophyta; Magnoliophyta; eudicotyledons; Gunneridae; Pentapetalae; rosids; fabids; Fabales; Fabaceae; Papilionoideae; Phaseoleae; Glycine; Soja	PF00067.21	p450	Cytochrome P450	COG2124	Cytochrome p450	.	ExpAA=23.82^PredHel=1^Topology=i13-35o	.	GO:0009809|lignin biosynthetic processGO:0055114|oxidation-reduction process	GO:0020037|heme binding;GO:0005506|iron ion binding;GO:0016709|oxidoreductase activity, acting on paired donors, with incorporation or reduction of molecular oxygen, NAD(P)H as one donor, and incorporation of one atom of oxygenGO:0005506|iron ion binding;GO:0016705|oxidoreductase activity, acting on paired donors, with incorporation or reduction of molecular oxygen;GO:0020037|heme binding	GO:0016021|integral component of membrane;GO:0016020|membrane
f2p60_1840_22893	2.15824	0	up	yes	1.98771	0	up	yes	1.35014	1.66823e-104	up	yes	0.789254	2.00649e-19	up	no	0.250929	0.00025577	up	no	Gene.11414::PuPacbio_f2p60_1840_transcript22893_g4::g.11414::m.11414	334-1635[+]	gi|183585158|gb|EU603302.1|	3229	E:0	Populus trichocarpa isolate C4H2 trans-cinnamate 4-hydroxylase mRNA, complete cds	gi|224145423|ref|XP_002325638.1|	889	E:0	trans-cinnamate 4-monooxygenase family protein [Populus trichocarpa]	TCMO_POPKI	866	E:0	RecName: Full=Trans-cinnamate 4-monooxygenase;^Eukaryota; Viridiplantae; Streptophyta; Embryophyta; Tracheophyta; Spermatophyta; Magnoliophyta; eudicotyledons; Gunneridae; Pentapetalae; rosids; fabids; Malpighiales; Salicaceae; Saliceae; Populus	TCMO_POPTM	869	E:0	RecName: Full=Trans-cinnamate 4-monooxygenase;^Eukaryota; Viridiplantae; Streptophyta; Embryophyta; Tracheophyta; Spermatophyta; Magnoliophyta; eudicotyledons; Gunneridae; Pentapetalae; rosids; fabids; Malpighiales; Salicaceae; Saliceae; Populus	PF00067.21	p450	Cytochrome P450	.	.	.	.	.	GO:0055114|oxidation-reduction process	GO:0020037|heme binding;GO:0005506|iron ion binding;GO:0016710|trans-cinnamate 4-monooxygenase activityGO:0005506|iron ion binding;GO:0016705|oxidoreductase activity, acting on paired donors, with incorporation or reduction of molecular oxygen;GO:0020037|heme binding	.
f2p60_1935_4546	0.996774	1.24043e-79	up	no	1.4954	4.40815e-143	up	yes	0.937241	5.734e-57	up	no	0.678195	2.10812e-19	up	no	0.16019	0.0722939	up	no	Gene.3326::PuPacbio_f2p60_1935_transcript4546_g1::g.3326::m.3326	1212-1637[+]	gi|566181178|ref|XM_002310252.2|	3306	E:0	Populus trichocarpa cytochrome P450 family protein (POPTR_0007s13720g) mRNA, complete cds	gi|224094911|ref|XP_002310288.1|	633	E:0	cytochrome P450 family protein [Populus trichocarpa]	C84A1_ARATH	447	E:0	RecName: Full=Cytochrome P450 84A1;^Eukaryota; Viridiplantae; Streptophyta; Embryophyta; Tracheophyta; Spermatophyta; Magnoliophyta; eudicotyledons; Gunneridae; Pentapetalae; rosids; malvids; Brassicales; Brassicaceae; Camelineae; Arabidopsis	C84A1_ARATH	253	E:1e-80	RecName: Full=Cytochrome P450 84A1;^Eukaryota; Viridiplantae; Streptophyta; Embryophyta; Tracheophyta; Spermatophyta; Magnoliophyta; eudicotyledons; Gunneridae; Pentapetalae; rosids; malvids; Brassicales; Brassicaceae; Camelineae; Arabidopsis	PF00067.21	p450	Cytochrome P450	COG2124	Cytochrome p450	.	.	.	GO:0009809|lignin biosynthetic process;GO:0009699|phenylpropanoid biosynthetic process;GO:0010224|response to UV-BGO:0055114|oxidation-reduction process	GO:0020037|heme binding;GO:0005506|iron ion binding;GO:0004497|monooxygenase activity;GO:0016709|oxidoreductase activity, acting on paired donors, with incorporation or reduction of molecular oxygen, NAD(P)H as one donor, and incorporation of one atom of oxygenGO:0005506|iron ion binding;GO:0016705|oxidoreductase activity, acting on paired donors, with incorporation or reduction of molecular oxyg…	GO:0005783|endoplasmic reticulum;GO:0016021|integral component of membrane;GO:0016020|membrane
f2p60_2057_4103	1.54458	3.25122e-133	up	yes	1.74546	4.23058e-190	up	yes	1.783	5.59548e-153	up	yes	0.954537	1.73268e-25	up	no	0.513164	2.55142e-11	up	no	Gene.3089::PuPacbio_f2p60_2057_transcript4103_g1::g.3089::m.3089	69-1700[+]	gi|566163416|ref|XM_002304789.2|	3319	E:0	Populus trichocarpa 4-coumarate-CoA ligase family protein (POPTR_0003s18720g) mRNA, complete cds	gi|566163417|ref|XP_002304825.2|	1027	E:0	4-coumarate-CoA ligase family protein [Populus trichocarpa]	4CL1_TOBAC	831	E:0	RecName: Full=4-coumarate--CoA ligase 1;^Eukaryota; Viridiplantae; Streptophyta; Embryophyta; Tracheophyta; Spermatophyta; Magnoliophyta; eudicotyledons; Gunneridae; Pentapetalae; asterids; lamiids; Solanales; Solanaceae; Nicotianoideae; Nicotianeae; Nicotiana	4CL1_TOBAC	852	E:0	RecName: Full=4-coumarate--CoA ligase 1;^Eukaryota; Viridiplantae; Streptophyta; Embryophyta; Tracheophyta; Spermatophyta; Magnoliophyta; eudicotyledons; Gunneridae; Pentapetalae; asterids; lamiids; Solanales; Solanaceae; Nicotianoideae; Nicotianeae; Nicotiana	PF00501.27	AMP-binding	AMP-binding enzyme	.	.	.	.	.	GO:0009698|phenylpropanoid metabolic processGO:0008152|metabolic process	GO:0016207|4-coumarate-CoA ligase activity;GO:0005524|ATP bindingGO:0003824|catalytic activity	.
f2p60_2079_21713	2.79064	0	up	yes	2.5066	0	up	yes	2.10205	2.40456e-225	up	yes	0.994906	3.16645e-45	up	no	0.557293	3.1829e-15	up	no	Gene.10688::PuPacbio_f2p60_2079_transcript21713_g3::g.10688::m.10688	72-1694[+]	gi|566147723|ref|XM_002297663.2|	3517	E:0	Populus trichocarpa 4-coumarate-CoA ligase family protein (POPTR_0001s07400g) mRNA, complete cds	gi|344222904|gb|AEN02915.1|	1043	E:0	4CL3 [Populus nigra]	4CL1_TOBAC	857	E:0	RecName: Full=4-coumarate--CoA ligase 1;^Eukaryota; Viridiplantae; Streptophyta; Embryophyta; Tracheophyta; Spermatophyta; Magnoliophyta; eudicotyledons; Gunneridae; Pentapetalae; asterids; lamiids; Solanales; Solanaceae; Nicotianoideae; Nicotianeae; Nicotiana	4CL1_TOBAC	885	E:0	RecName: Full=4-coumarate--CoA ligase 1;^Eukaryota; Viridiplantae; Streptophyta; Embryophyta; Tracheophyta; Spermatophyta; Magnoliophyta; eudicotyledons; Gunneridae; Pentapetalae; asterids; lamiids; Solanales; Solanaceae; Nicotianoideae; Nicotianeae; Nicotiana	PF00501.27	AMP-binding	AMP-binding enzyme	.	.	.	.	.	GO:0009698|phenylpropanoid metabolic processGO:0008152|metabolic process	GO:0016207|4-coumarate-CoA ligase activity;GO:0005524|ATP bindingGO:0003824|catalytic activity	.
f2p60_2638_2450	2.25289	0	up	yes	2.04711	0	up	yes	1.43079	4.42349e-131	up	yes	0.841576	4.627e-59	up	no	0.636413	1.91261e-28	up	no	Gene.2024::PuPacbio_f2p60_2638_transcript2450_g1::g.2024::m.2024	213-2348[+]	gi|566182221|ref|XM_002311977.2|	4403	E:0	Populus trichocarpa phenylalanine ammonia-lyase family protein (POPTR_0008s03810g) mRNA, complete cds	gi|224100783|ref|XP_002312013.1|	1429	E:0	phenylalanine ammonia-lyase family protein [Populus trichocarpa]	PAL2_POPKI	1319	E:0	RecName: Full=Phenylalanine ammonia-lyase G2B;^Eukaryota; Viridiplantae; Streptophyta; Embryophyta; Tracheophyta; Spermatophyta; Magnoliophyta; eudicotyledons; Gunneridae; Pentapetalae; rosids; fabids; Malpighiales; Salicaceae; Saliceae; Populus	PAL2_POPKI	1345	E:0	RecName: Full=Phenylalanine ammonia-lyase G2B;^Eukaryota; Viridiplantae; Streptophyta; Embryophyta; Tracheophyta; Spermatophyta; Magnoliophyta; eudicotyledons; Gunneridae; Pentapetalae; rosids; fabids; Malpighiales; Salicaceae; Saliceae; Populus	PF00221.18	Lyase_aromatic	Aromatic amino acid lyase	.	.	.	.	.	GO:0009800|cinnamic acid biosynthetic process;GO:0006559|L-phenylalanine catabolic process	GO:0045548|phenylalanine ammonia-lyase activity	GO:0005737|cytoplasm
f2p60_452_37068	1.75975	7.40345e-17	up	yes	1.64832	1.40736e-20	up	yes	1.10465	4.85462e-08	up	yes	1.02297	1.89097e-06	up	yes	0.47669	0.0204702	up	no	.	.	gi|403324483|gb|JX552713.1|	612	E:4e-172	Populus fremontii isolate COMT2_15-B_3 caffeate O-methyltransferase (COMT2) gene, partial cds	.	.	.	.	.	.	.	.	.	.	.	.	.	.	.	.	.	.	.	.	.	.	.
f2p60_567_356833	0.990686	7.39129e-17	up	no	1.28029	1.70488e-34	up	yes	0.981134	1.68295e-14	up	no	0.32244	0.0283066	up	no	0.307159	0.0487126	up	no	Gene.16560::PuPacbio_f2p60_567_transcript35683_g13::g.16560::m.16560	2-391[+]	gi|566174116|ref|XM_006380883.1|	979	E:0	Populus trichocarpa hypothetical protein (POPTR_0006s02530g) mRNA, complete cds	gi|566174115|ref|XP_002307925.2|	263	E:2e-84	hypothetical protein POPTR_0006s02530g [Populus trichocarpa]	CADH1_ARATH	209	E:9e-65	RecName: Full=Probable cinnamyl alcohol dehydrogenase 1;^Eukaryota; Viridiplantae; Streptophyta; Embryophyta; Tracheophyta; Spermatophyta; Magnoliophyta; eudicotyledons; Gunneridae; Pentapetalae; rosids; malvids; Brassicales; Brassicaceae; Camelineae; Arabidopsis	CADH1_ARATH	209	E:1e-65	RecName: Full=Probable cinnamyl alcohol dehydrogenase 1;^Eukaryota; Viridiplantae; Streptophyta; Embryophyta; Tracheophyta; Spermatophyta; Magnoliophyta; eudicotyledons; Gunneridae; Pentapetalae; rosids; malvids; Brassicales; Brassicaceae; Camelineae; Arabidopsis	PF00107.25	ADH_zinc_N	Zinc-binding dehydrogenase	COG1064	alcohol dehydrogenase	.	.	.	GO:0009809|lignin biosynthetic processGO:0055114|oxidation-reduction process	GO:0045551|cinnamyl-alcohol dehydrogenase activity;GO:0052747|sinapyl alcohol dehydrogenase activity;GO:0008270|zinc ion binding	GO:0005829|cytosol
f2p60_653_34474	1.68809	0.000232083	up	yes	2.8122	1.49215e-13	up	yes	0.725876	0.0622504	up	no	0.84029	0.0120726	up	no	0.202899	0.521397	up	no	Gene.16377::PuPacbio_f2p60_653_transcript34474_g7::g.16377::m.16377	3-332[+]	gi|566176384|ref|XM_006381556.1|	870	E:0	Populus trichocarpa hypothetical protein (POPTR_0006s14370g) mRNA, complete cds	gi|743905227|ref|XP_011046010.1|	231	E:1e-69	PREDICTED: flavonoid 3'-monooxygenase-like [Populus euphratica]	C98A2_SOYBN	124	E:1e-31	RecName: Full=Cytochrome P450 98A2;^Eukaryota; Viridiplantae; Streptophyta; Embryophyta; Tracheophyta; Spermatophyta; Magnoliophyta; eudicotyledons; Gunneridae; Pentapetalae; rosids; fabids; Fabales; Fabaceae; Papilionoideae; Phaseoleae; Glycine; Soja	C98A2_SOYBN	124	E:3e-33	RecName: Full=Cytochrome P450 98A2;^Eukaryota; Viridiplantae; Streptophyta; Embryophyta; Tracheophyta; Spermatophyta; Magnoliophyta; eudicotyledons; Gunneridae; Pentapetalae; rosids; fabids; Fabales; Fabaceae; Papilionoideae; Phaseoleae; Glycine; Soja	PF00067.21	p450	Cytochrome P450	COG2124	Cytochrome p450	.	.	.	GO:0009809|lignin biosynthetic processGO:0055114|oxidation-reduction process	GO:0020037|heme binding;GO:0005506|iron ion binding;GO:0016709|oxidoreductase activity, acting on paired donors, with incorporation or reduction of molecular oxygen, NAD(P)H as one donor, and incorporation of one atom of oxygenGO:0005506|iron ion binding;GO:0016705|oxidoreductase activity, acting on paired donors, with incorporation or reduction of molecular oxygen;GO:0020037|heme binding	GO:0016021|integral component of membrane;GO:0016020|membrane
f2p60_956_11446	2.38623	1.2762e-231	up	yes	1.59202	2.42762e-99	up	yes	1.53344	5.68042e-81	up	yes	-0.354639	NA	down	no	-1.72763	1.89287e-33	down	yes	Gene.6425::PuPacbio_f2p60_956_transcript11446_g1::g.6425::m.6425	1-792[+]	gi|183585160|gb|EU603303.1|	1681	E:0	Populus trichocarpa isolate C4H3 trans-cinnamate 4-hydroxylase mRNA, complete cds	gi|183585161|gb|ACC63872.1|	513	E:1e-177	trans-cinnamate 4-hydroxylase [Populus trichocarpa]	C7A10_PANGI	427	E:3e-145	RecName: Full=Cytochrome P450 CYP73A100;^Eukaryota; Viridiplantae; Streptophyta; Embryophyta; Tracheophyta; Spermatophyta; Magnoliophyta; eudicotyledons; Gunneridae; Pentapetalae; asterids; campanulids; Apiales; Araliaceae; Panax	C7A10_PANGI	452	E:3e-156	RecName: Full=Cytochrome P450 CYP73A100;^Eukaryota; Viridiplantae; Streptophyta; Embryophyta; Tracheophyta; Spermatophyta; Magnoliophyta; eudicotyledons; Gunneridae; Pentapetalae; asterids; campanulids; Apiales; Araliaceae; Panax	PF00067.21	p450	Cytochrome P450	.	.	.	.	.	GO:0055114|oxidation-reduction process	GO:0020037|heme binding;GO:0005506|iron ion binding;GO:0004497|monooxygenase activity;GO:0016705|oxidoreductase activity, acting on paired donors, with incorporation or reduction of molecular oxygenGO:0005506|iron ion binding;GO:0016705|oxidoreductase activity, acting on paired donors, with incorporation or reduction of molecular oxygen;GO:0020037|heme binding	GO:0016021|integral component of membrane
f3p60_1106_10142	-1.14677	1.47033e-58	down	yes	-0.699398	1.26824e-28	down	no	0.0490969	0.520004	up	no	0.389237	0.00793901	up	no	0.0228473	0.762767	up	no	Gene.5927::PuPacbio_f3p60_1106_transcript10142_g4::g.5927::m.5927	1-918[+]	gi|566200930|ref|XM_006376319.1|	1068	E:0	Populus trichocarpa 6a-hydroxymaackiain methyltransferase family protein (POPTR_0013s12510g) mRNA, complete cds	gi|947067991|gb|KRH17134.1|	363	E:7e-122	hypothetical protein GLYMA_14G200800 [Glycine max]	ROMT_VITVI	226	E:9e-69	RecName: Full=Trans-resveratrol di-O-methyltransferase;^Eukaryota; Viridiplantae; Streptophyta; Embryophyta; Tracheophyta; Spermatophyta; Magnoliophyta; eudicotyledons; Gunneridae; Pentapetalae; rosids; Vitales; Vitaceae; Vitis	CVMT1_OCIBA	256	E:4e-81	RecName: Full=Chavicol O-methyltransferase;^Eukaryota; Viridiplantae; Streptophyta; Embryophyta; Tracheophyta; Spermatophyta; Magnoliophyta; eudicotyledons; Gunneridae; Pentapetalae; asterids; lamiids; Lamiales; Lamiaceae; Nepetoideae; Ocimeae; Ocimum	PF08100.10	Dimerisation	Dimerisation domain	.	.	.	.	.	GO:0009699|phenylpropanoid biosynthetic process	GO:0050630|(iso)eugenol O-methyltransferase activity;GO:0046983|protein dimerization activityGO:0046983|protein dimerization activity;GO:0008171|O-methyltransferase activity	.
f3p60_1267_27241	-0.21516	0.228557	down	no	-1.16941	6.44406e-10	down	yes	-0.0238756	0.886096	down	no	0.273441	0.212449	up	no	0.488258	0.0243549	up	no	Gene.13650::PuPacbio_f3p60_1267_transcript27241_g3::g.13650::m.13650	1-1110[+]	gi|743885041|ref|XM_011039140.1|	1853	E:0	PREDICTED: Populus euphratica trans-resveratrol di-O-methyltransferase-like (LOC105134656), mRNA	gi|566200953|ref|XP_006376392.1|	655	E:0	hypothetical protein POPTR_0013s12620g [Populus trichocarpa]	ROMT_VITVI	442	E:4e-152	RecName: Full=Trans-resveratrol di-O-methyltransferase;^Eukaryota; Viridiplantae; Streptophyta; Embryophyta; Tracheophyta; Spermatophyta; Magnoliophyta; eudicotyledons; Gunneridae; Pentapetalae; rosids; Vitales; Vitaceae; Vitis	ROMT_VITVI	476	E:2e-166	RecName: Full=Trans-resveratrol di-O-methyltransferase;^Eukaryota; Viridiplantae; Streptophyta; Embryophyta; Tracheophyta; Spermatophyta; Magnoliophyta; eudicotyledons; Gunneridae; Pentapetalae; rosids; Vitales; Vitaceae; Vitis	PF08100.10	Dimerisation	Dimerisation domain	ENOG410XS7T	o-methyltransferase	.	.	.	GO:0019438|aromatic compound biosynthetic process	GO:0008171|O-methyltransferase activity;GO:0046983|protein dimerization activity;GO:0102303|resveratrol 3,5-O-dimethyltransferase activity;GO:0008757|S-adenosylmethionine-dependent methyltransferase activityGO:0046983|protein dimerization activity;GO:0008171|O-methyltransferase activity	.
f3p60_1514_25096	1.27146	1.92378e-195	up	yes	1.35251	1.66648e-227	up	yes	0.946501	3.50832e-68	up	no	0.753451	9.51261e-13	up	no	0.388781	7.62052e-08	up	no	Gene.12633::PuPacbio_f3p60_1514_transcript25096_g2::g.12633::m.12633	3-1166[+]	gi|566196100|ref|XM_002317802.2|	2662	E:0	Populus trichocarpa Chain A family protein (POPTR_0012s00670g) mRNA, complete cds	gi|7332271|gb|AAF60951.1|	748	E:0	O-methyltransferase [Populus trichocarpa x Populus deltoides]	COMT1_POPTM	743	E:0	RecName: Full=Caffeic acid 3-O-methyltransferase 1;^Eukaryota; Viridiplantae; Streptophyta; Embryophyta; Tracheophyta; Spermatophyta; Magnoliophyta; eudicotyledons; Gunneridae; Pentapetalae; rosids; fabids; Malpighiales; Salicaceae; Saliceae; Populus	COMT1_POPTM	743	E:0	RecName: Full=Caffeic acid 3-O-methyltransferase 1;^Eukaryota; Viridiplantae; Streptophyta; Embryophyta; Tracheophyta; Spermatophyta; Magnoliophyta; eudicotyledons; Gunneridae; Pentapetalae; rosids; fabids; Malpighiales; Salicaceae; Saliceae; Populus	PF08100.10	Dimerisation	Dimerisation domain	.	.	.	.	.	GO:0009809|lignin biosynthetic process	GO:0047763|caffeate O-methyltransferase activity;GO:0046983|protein dimerization activityGO:0046983|protein dimerization activity;GO:0008171|O-methyltransferase activity	.
f3p60_1864_22732	1.38309	4.69399e-188	up	yes	1.45482	2.9709e-174	up	yes	0.957901	6.92642e-59	up	no	0.553714	3.85667e-11	up	no	0.276387	0.000129551	up	no	Gene.11326::PuPacbio_f3p60_1864_transcript22732_g1::g.11326::m.11326	93-1619[+]	gi|566174226|ref|XM_002308824.2|	3197	E:0	Populus trichocarpa Cytochrome P450 98A3 family protein (POPTR_0006s03180g) mRNA, complete cds	gi|224089905|ref|XP_002308860.1|	1047	E:0	Cytochrome P450 98A3 family protein [Populus trichocarpa]	C98A2_SOYBN	948	E:0	RecName: Full=Cytochrome P450 98A2;^Eukaryota; Viridiplantae; Streptophyta; Embryophyta; Tracheophyta; Spermatophyta; Magnoliophyta; eudicotyledons; Gunneridae; Pentapetalae; rosids; fabids; Fabales; Fabaceae; Papilionoideae; Phaseoleae; Glycine; Soja	C98A2_SOYBN	949	E:0	RecName: Full=Cytochrome P450 98A2;^Eukaryota; Viridiplantae; Streptophyta; Embryophyta; Tracheophyta; Spermatophyta; Magnoliophyta; eudicotyledons; Gunneridae; Pentapetalae; rosids; fabids; Fabales; Fabaceae; Papilionoideae; Phaseoleae; Glycine; Soja	PF00067.21	p450	Cytochrome P450	COG2124	Cytochrome p450	.	.	.	GO:0009809|lignin biosynthetic processGO:0055114|oxidation-reduction process	GO:0020037|heme binding;GO:0005506|iron ion binding;GO:0016709|oxidoreductase activity, acting on paired donors, with incorporation or reduction of molecular oxygen, NAD(P)H as one donor, and incorporation of one atom of oxygenGO:0005506|iron ion binding;GO:0016705|oxidoreductase activity, acting on paired donors, with incorporation or reduction of molecular oxygen;GO:0020037|heme binding	GO:0016021|integral component of membrane;GO:0016020|membrane
f3p60_2093_21660	1.65342	5.89372e-101	up	yes	1.48398	7.96274e-90	up	yes	1.09018	2.40646e-30	up	yes	1.02173	7.84647e-11	up	yes	0.39875	0.0063971	up	no	Gene.10643::PuPacbio_f3p60_2093_transcript21660_g1::g.10643::m.10643	93-1745[+]	gi|566197661|ref|XM_002318672.2|	3528	E:0	Populus trichocarpa hypothetical protein (POPTR_0012s09650g) mRNA, complete cds	gi|566197662|ref|XP_002318708.2|	1013	E:0	hypothetical protein POPTR_0012s09650g [Populus trichocarpa]	4CLL9_ARATH	654	E:0	RecName: Full=4-coumarate--CoA ligase-like 9;^Eukaryota; Viridiplantae; Streptophyta; Embryophyta; Tracheophyta; Spermatophyta; Magnoliophyta; eudicotyledons; Gunneridae; Pentapetalae; rosids; malvids; Brassicales; Brassicaceae; Camelineae; Arabidopsis	4CLL9_ARATH	695	E:0	RecName: Full=4-coumarate--CoA ligase-like 9;^Eukaryota; Viridiplantae; Streptophyta; Embryophyta; Tracheophyta; Spermatophyta; Magnoliophyta; eudicotyledons; Gunneridae; Pentapetalae; rosids; malvids; Brassicales; Brassicaceae; Camelineae; Arabidopsis	PF00501.27	AMP-binding	AMP-binding enzyme	COG0318	Amp-dependent synthetase and ligase	.	.	.	GO:0009695|jasmonic acid biosynthetic process;GO:0031408|oxylipin biosynthetic processGO:0008152|metabolic process	GO:0005524|ATP binding;GO:0004321|fatty-acyl-CoA synthase activity;GO:0016874|ligase activityGO:0003824|catalytic activity	GO:0005777|peroxisome
f3p60_2144_3723	2.4036	8.18784e-13	up	yes	2.0176	3.40457e-09	up	yes	1.27712	0.000131041	up	yes	1.08088	0.000484364	up	yes	0.620538	0.0508288	up	no	Gene.2835::PuPacbio_f3p60_2144_transcript3723_g1::g.2835::m.2835	215-604[+]	gi|183585196|gb|EU603321.1|	1090	E:0	Populus trichocarpa isolate PAL2 phenylalanine ammonia-lyase mRNA, complete cds	gi|403327289|gb|AFR41018.1|	263	E:6e-81	phenylalanine ammonia-lyase, partial [Populus trichocarpa]	PAL2_POPKI	244	E:2e-68	RecName: Full=Phenylalanine ammonia-lyase G2B;^Eukaryota; Viridiplantae; Streptophyta; Embryophyta; Tracheophyta; Spermatophyta; Magnoliophyta; eudicotyledons; Gunneridae; Pentapetalae; rosids; fabids; Malpighiales; Salicaceae; Saliceae; Populus	PAL2_POPKI	244	E:6e-76	RecName: Full=Phenylalanine ammonia-lyase G2B;^Eukaryota; Viridiplantae; Streptophyta; Embryophyta; Tracheophyta; Spermatophyta; Magnoliophyta; eudicotyledons; Gunneridae; Pentapetalae; rosids; fabids; Malpighiales; Salicaceae; Saliceae; Populus	PF00221.18	Lyase_aromatic	Aromatic amino acid lyase	.	.	.	.	.	GO:0009800|cinnamic acid biosynthetic process;GO:0006559|L-phenylalanine catabolic process	GO:0045548|phenylalanine ammonia-lyase activity	GO:0005737|cytoplasm
f3p60_2656_2364	2.11354	0	up	yes	2.05317	2.1387e-292	up	yes	1.60844	1.54568e-141	up	yes	1.15192	4.12045e-40	up	yes	0.910955	1.24423e-29	up	no	Gene.1961::PuPacbio_f3p60_2656_transcript2364_g2::g.1961::m.1961	226-2361[+]	gi|566192302|ref|XM_002315272.2|	4628	E:0	Populus trichocarpa phenylalanine ammonia-lyase family protein (POPTR_0010s23100g) mRNA, complete cds	gi|764120818|gb|AJR20994.1|	1468	E:0	phenylalanine ammonia-lyase [Populus szechuanica]	PAL2_POPKI	1414	E:0	RecName: Full=Phenylalanine ammonia-lyase G2B;^Eukaryota; Viridiplantae; Streptophyta; Embryophyta; Tracheophyta; Spermatophyta; Magnoliophyta; eudicotyledons; Gunneridae; Pentapetalae; rosids; fabids; Malpighiales; Salicaceae; Saliceae; Populus	PAL2_POPKI	1414	E:0	RecName: Full=Phenylalanine ammonia-lyase G2B;^Eukaryota; Viridiplantae; Streptophyta; Embryophyta; Tracheophyta; Spermatophyta; Magnoliophyta; eudicotyledons; Gunneridae; Pentapetalae; rosids; fabids; Malpighiales; Salicaceae; Saliceae; Populus	PF00221.18	Lyase_aromatic	Aromatic amino acid lyase	.	.	.	.	.	GO:0009800|cinnamic acid biosynthetic process;GO:0006559|L-phenylalanine catabolic process	GO:0045548|phenylalanine ammonia-lyase activity	GO:0005737|cytoplasm
f4p60_1446_8121	1.37302	5.47982e-167	up	yes	1.57629	1.39535e-236	up	yes	1.45857	4.37173e-131	up	yes	1.16913	1.0777e-100	up	yes	0.941714	1.69998e-42	up	no	Gene.5062::PuPacbio_f4p60_1446_transcript8121_g1::g.5062::m.5062	216-1232[+]	gi|183585174|gb|EU603310.1|	2302	E:0	Populus trichocarpa isolate CCR2 cinnamoyl CoA reductase mRNA, complete cds	gi|190710713|gb|ACE95172.1|	653	E:0	cinnamoyl-CoA reductase [Populus tomentosa]	CCR1_ARATH	506	E:1e-176	RecName: Full=Cinnamoyl-CoA reductase 1;^Eukaryota; Viridiplantae; Streptophyta; Embryophyta; Tracheophyta; Spermatophyta; Magnoliophyta; eudicotyledons; Gunneridae; Pentapetalae; rosids; malvids; Brassicales; Brassicaceae; Camelineae; Arabidopsis	CCR1_ARATH	523	E:0	RecName: Full=Cinnamoyl-CoA reductase 1;^Eukaryota; Viridiplantae; Streptophyta; Embryophyta; Tracheophyta; Spermatophyta; Magnoliophyta; eudicotyledons; Gunneridae; Pentapetalae; rosids; malvids; Brassicales; Brassicaceae; Camelineae; Arabidopsis	PF01370.20	Epimerase	NAD dependent epimerase/dehydratase family	COG0451	Nad-dependent epimerase dehydratase	.	.	.	GO:0007623|circadian rhythm;GO:0009809|lignin biosynthetic process;GO:0009409|response to coldGO:0006694|steroid biosynthetic process;GO:0055114|oxidation-reduction process	GO:0016621|cinnamoyl-CoA reductase activity;GO:0050662|coenzyme bindingGO:0003824|catalytic activity;GO:0050662|coenzyme binding;GO:0003854|3-beta-hydroxy-delta5-steroid dehydrogenase activity;GO:0016616|oxidoreductase activity, acting on the CH-OH group of donors, NAD or NADP as acceptor	GO:0005829|cytosol
f6p60_1412_25819	0.540345	0.0285816	up	no	1.80948	3.85395e-21	up	yes	1.88158	1.4921e-22	up	yes	1.74566	1.0265e-19	up	yes	1.4244	7.41781e-13	up	yes	Gene.12988::PuPacbio_f6p60_1412_transcript25819_g2::g.12988::m.12988	48-770[+]	gi|118485386|gb|EF146480.1|	2501	E:0	Populus trichocarpa clone WS0118_H17 unknown mRNA	gi|224060461|ref|XP_002300211.1|	449	E:0	mannitol dehydrogenase 1 family protein [Populus trichocarpa]	CADH9_ARATH	353	E:1e-155	RecName: Full=Probable cinnamyl alcohol dehydrogenase 9;^Eukaryota; Viridiplantae; Streptophyta; Embryophyta; Tracheophyta; Spermatophyta; Magnoliophyta; eudicotyledons; Gunneridae; Pentapetalae; rosids; malvids; Brassicales; Brassicaceae; Camelineae; Arabidopsis	CADH9_ARATH	371	E:4e-127	RecName: Full=Probable cinnamyl alcohol dehydrogenase 9;^Eukaryota; Viridiplantae; Streptophyta; Embryophyta; Tracheophyta; Spermatophyta; Magnoliophyta; eudicotyledons; Gunneridae; Pentapetalae; rosids; malvids; Brassicales; Brassicaceae; Camelineae; Arabidopsis	PF08240.11	ADH_N	Alcohol dehydrogenase GroES-like domain	COG1064	alcohol dehydrogenase	.	.	.	GO:0009809|lignin biosynthetic process;GO:0009735|response to cytokininGO:0055114|oxidation-reduction process	GO:0045551|cinnamyl-alcohol dehydrogenase activity;GO:0052747|sinapyl alcohol dehydrogenase activity;GO:0008270|zinc ion bindingGO:0051287|NAD binding	GO:0048046|apoplast
[truncated: 2 more columns]
