# Supplementary material for: Characterization of the Gene Expression Profile Response to Drought Stress in Populus ussuriensis Using PacBio SMRT and Illumina Sequencing
Source: Int J Mol Sci. 2022 Mar 30;23(7):3840. doi: 10.3390/ijms23073840 (PMC8998571; doi:10.3390/ijms23073840)
Supplement: Supplementary file 1 [file ijms-23-03840-s001.zip › Table S12.xls]

## Sheet: Sheet1
Table S12 Transcription factors response to drought stress in Populus ussuriensis
Family	Gene ID	6h(Log2FoldChange)	pval	Up/Down	Significant	12h(Log2FoldChange)	pval	Up/Down	Significant	24h(Log2FoldChange)	pval	Up/Down	Significant	48h(Log2FoldChange)	pval	Up/Down	Significant	120h(Log2FoldChange)	pval	Up/Down	Significant	NT_TopHit	NT_Score	NT_Evalue	NT_Description	NR_TopHit	NR_Score	NR_Evalue	NR_Description	BLASTX_Sprot_TopHit	BLASTX_Score	BLASTX_Evalue	BLASTX_Description	BLASTP_Sprot_TopHit	BLASTP_Score	BLASTP_Evalue	BLASTP_Description	PFAM_TopHit	PFAM_Name	PFAM_Description	eggNOG_TopHit	eggNOG_Description	GO_biological_process	GO_molecular_function	GO_cellular_component	KO	Map
AP2/ERF	f2p60_1109_10118	1.34904	0.0166349	up	no	1.37338	0.0104571	up	no	1.0869	0.00403457	up	yes	0.0125036	0.932604	up	no	0.0952508	0.607448	up	no	gi|700368487|gb|KM657471.1|	1539	E:0	Populus simonii genotype 32 C-repeat/dehydration-responsive element-binding factor 2 (CBF2) gene, complete cds	gi|700368488|gb|AIU93315.1|	476	E:2e-166	C-repeat/dehydration-responsive element-binding factor 2 [Populus simonii]	DRE1C_ARATH	164	E:8e-47	RecName: Full=Dehydration-responsive element-binding protein 1C;^Eukaryota; Viridiplantae; Streptophyta; Embryophyta; Tracheophyta; Spermatophyta; Magnoliophyta; eudicotyledons; Gunneridae; Pentapetalae; rosids; malvids; Brassicales; Brassicaceae; Camelineae; Arabidopsis	DRE1D_ARATH	194	E:2e-59	RecName: Full=Dehydration-responsive element-binding protein 1D;^Eukaryota; Viridiplantae; Streptophyta; Embryophyta; Tracheophyta; Spermatophyta; Magnoliophyta; eudicotyledons; Gunneridae; Pentapetalae; rosids; malvids; Brassicales; Brassicaceae; Camelineae; Arabidopsis	PF00847.19	AP2	AP2 domain	ENOG410YK37	dehydration-responsive element-binding protein	GO:0009738|abscisic acid-activated signaling pathway;GO:0019760|glucosinolate metabolic process;GO:0006351|transcription, DNA-templatedGO:0006355|regulation of transcription, DNA-templated	GO:0043565|sequence-specific DNA binding;GO:0003700|transcription factor activity, sequence-specific DNA bindingGO:0003700|transcription factor activity, sequence-specific DNA binding	GO:0005634|nucleus	.
	f13p60_1166_28203	1.7575	1.54329e-42	up	yes	1.0265	1.73549e-12	up	yes	1.11643	2.5748e-15	up	yes	0.689624	NA	up	no	-0.17521	0.337955	down	no	gi|566161469|ref|XM_002304266.2|	1845	E:0	Populus trichocarpa hypothetical protein (POPTR_0003s07910g) mRNA, complete cds	gi|224074209|ref|XP_002304302.1|	397	E:1e-134	hypothetical protein POPTR_0003s07910g [Populus trichocarpa]	EF100_ARATH	211	E:8e-64	RecName: Full=Ethylene-responsive transcription factor 1A;^Eukaryota; Viridiplantae; Streptophyta; Embryophyta; Tracheophyta; Spermatophyta; Magnoliophyta; eudicotyledons; Gunneridae; Pentapetalae; rosids; malvids; Brassicales; Brassicaceae; Camelineae; Arabidopsis	EF100_ARATH	264	E:9e-86	RecName: Full=Ethylene-responsive transcription factor 1A;^Eukaryota; Viridiplantae; Streptophyta; Embryophyta; Tracheophyta; Spermatophyta; Magnoliophyta; eudicotyledons; Gunneridae; Pentapetalae; rosids; malvids; Brassicales; Brassicaceae; Camelineae; Arabidopsis	PF00847.19	AP2	AP2 domain	ENOG410YJV7	Transcription factor	GO:0051301|cell division;GO:0006952|defense response;GO:0009873|ethylene-activated signaling pathway;GO:0010200|response to chitin;GO:0006351|transcription, DNA-templated;GO:0001944|vasculature developmentGO:0006355|regulation of transcription, DNA-templated	GO:0003677|DNA binding;GO:0003700|transcription factor activity, sequence-specific DNA bindingGO:0003700|transcription factor activity, sequence-specific DNA binding	GO:0005634|nucleus	K09286|EREBP; EREBP-like factor
	f3p60_1131_9867	1.59525	6.85658e-94	up	yes	0.877058	5.13781e-28	up	no	0.509067	1.72618e-08	up	no	0.402098	0.0264201	up	no	-0.552335	1.02935e-07	down	no	gi|156447066|gb|AC208999.1|	1967	E:0	Populus trichocarpa clone POP021-B12, complete sequence	gi|566149142|ref|XP_006368978.1|	429	E:2e-147	hypothetical protein POPTR_0001s15390g [Populus trichocarpa]	EF100_ARATH	221	E:6e-68	RecName: Full=Ethylene-responsive transcription factor 1A;^Eukaryota; Viridiplantae; Streptophyta; Embryophyta; Tracheophyta; Spermatophyta; Magnoliophyta; eudicotyledons; Gunneridae; Pentapetalae; rosids; malvids; Brassicales; Brassicaceae; Camelineae; Arabidopsis	EF100_ARATH	263	E:3e-85	RecName: Full=Ethylene-responsive transcription factor 1A;^Eukaryota; Viridiplantae; Streptophyta; Embryophyta; Tracheophyta; Spermatophyta; Magnoliophyta; eudicotyledons; Gunneridae; Pentapetalae; rosids; malvids; Brassicales; Brassicaceae; Camelineae; Arabidopsis	PF00847.19	AP2	AP2 domain	ENOG410YJV7	Transcription factor	GO:0051301|cell division;GO:0006952|defense response;GO:0009873|ethylene-activated signaling pathway;GO:0010200|response to chitin;GO:0006351|transcription, DNA-templated;GO:0001944|vasculature developmentGO:0006355|regulation of transcription, DNA-templated	GO:0003677|DNA binding;GO:0003700|transcription factor activity, sequence-specific DNA bindingGO:0003700|transcription factor activity, sequence-specific DNA binding	GO:0005634|nucleus	K09286|EREBP; EREBP-like factor
	f2p60_1376_26205	0.968071	1.11858e-35	up	no	1.05125	3.64134e-43	up	yes	1.48566	1.17148e-62	up	yes	1.36403	3.85973e-36	up	yes	1.09873	4.80324e-37	up	yes	gi|156447066|gb|AC208999.1|	2392	E:0	Populus trichocarpa clone POP021-B12, complete sequence	gi|566149144|ref|XP_006368979.1|	478	E:3e-164	Ethylene responsive element binding factor 5 family protein [Populus trichocarpa]	EF103_ARATH	158	E:8e-43	RecName: Full=Ethylene-responsive transcription factor 6;^Eukaryota; Viridiplantae; Streptophyta; Embryophyta; Tracheophyta; Spermatophyta; Magnoliophyta; eudicotyledons; Gunneridae; Pentapetalae; rosids; malvids; Brassicales; Brassicaceae; Camelineae; Arabidopsis	EF102_ARATH	211	E:5e-64	RecName: Full=Ethylene-responsive transcription factor 5;^Eukaryota; Viridiplantae; Streptophyta; Embryophyta; Tracheophyta; Spermatophyta; Magnoliophyta; eudicotyledons; Gunneridae; Pentapetalae; rosids; malvids; Brassicales; Brassicaceae; Camelineae; Arabidopsis	PF00847.19	AP2	AP2 domain	ENOG410Z37D	Transcription factor	GO:0006952|defense response;GO:0009873|ethylene-activated signaling pathway;GO:0010200|response to chitin;GO:0009409|response to cold;GO:0006351|transcription, DNA-templatedGO:0006355|regulation of transcription, DNA-templated	GO:0043565|sequence-specific DNA binding;GO:0003700|transcription factor activity, sequence-specific DNA bindingGO:0003700|transcription factor activity, sequence-specific DNA binding	GO:0005634|nucleus	K09286|EREBP; EREBP-like factor
	f2p59_1051_10671	-1.12025	8.39271e-05	down	yes	-1.25872	1.241e-05	down	yes	-1.05265	0.000136019	down	yes	-1.12911	1.38394e-05	down	yes	-1.29371	2.6654e-06	down	yes	gi|164663918|gb|AC216594.1|	1849	E:0	Populus trichocarpa clone POP017-A13, complete sequence	gi|566162743|ref|XP_006385827.1|	311	E:4e-116	hypothetical protein POPTR_0003s15060g [Populus trichocarpa]	EF106_ARATH	139	E:2e-37	RecName: Full=Ethylene-responsive transcription factor ERF106;^Eukaryota; Viridiplantae; Streptophyta; Embryophyta; Tracheophyta; Spermatophyta; Magnoliophyta; eudicotyledons; Gunneridae; Pentapetalae; rosids; malvids; Brassicales; Brassicaceae; Camelineae; Arabidopsis	EF106_ARATH	138	E:9e-40	RecName: Full=Ethylene-responsive transcription factor ERF106;^Eukaryota; Viridiplantae; Streptophyta; Embryophyta; Tracheophyta; Spermatophyta; Magnoliophyta; eudicotyledons; Gunneridae; Pentapetalae; rosids; malvids; Brassicales; Brassicaceae; Camelineae; Arabidopsis	PF00847.19	AP2	AP2 domain	ENOG4111416	Transcription factor	GO:0009873|ethylene-activated signaling pathway;GO:0006351|transcription, DNA-templatedGO:0006355|regulation of transcription, DNA-templated	GO:0003677|DNA binding;GO:0003700|transcription factor activity, sequence-specific DNA bindingGO:0003700|transcription factor activity, sequence-specific DNA binding	GO:0005634|nucleus	.
	f2p49_1082_29161	0.852173	0.124148	up	no	0.754371	0.149373	up	no	2.09504	9.44396e-08	up	yes	0.229196	0.310711	up	no	0.157975	0.458155	up	no	gi|743794509|ref|XM_011002160.1|	1727	E:0	PREDICTED: Populus euphratica ethylene-responsive transcription factor ERF109-like (LOC105108020), mRNA	gi|224105547|ref|XP_002313851.1|	403	E:7e-138	hypothetical protein POPTR_0009s10470g [Populus trichocarpa]	EF109_ARATH	120	E:4e-30	RecName: Full=Ethylene-responsive transcription factor ERF109;^Eukaryota; Viridiplantae; Streptophyta; Embryophyta; Tracheophyta; Spermatophyta; Magnoliophyta; eudicotyledons; Gunneridae; Pentapetalae; rosids; malvids; Brassicales; Brassicaceae; Camelineae; Arabidopsis	EF109_ARATH	132	E:2e-35	RecName: Full=Ethylene-responsive transcription factor ERF109;^Eukaryota; Viridiplantae; Streptophyta; Embryophyta; Tracheophyta; Spermatophyta; Magnoliophyta; eudicotyledons; Gunneridae; Pentapetalae; rosids; malvids; Brassicales; Brassicaceae; Camelineae; Arabidopsis	PF00847.19	AP2	AP2 domain	ENOG410YN6X	transcription factor	GO:0051301|cell division;GO:0050832|defense response to fungus;GO:0009873|ethylene-activated signaling pathway;GO:0010200|response to chitin;GO:0006351|transcription, DNA-templated;GO:0001944|vasculature developmentGO:0006355|regulation of transcription, DNA-templated	GO:0003677|DNA binding;GO:0003700|transcription factor activity, sequence-specific DNA bindingGO:0003700|transcription factor activity, sequence-specific DNA binding	GO:0005634|nucleus	.
	f3p60_1183_28027	-0.997815	0.00010671	down	no	-1.06072	1.61111e-05	down	yes	0.452196	0.0189232	up	no	-0.241596	0.438791	down	no	-0.29382	0.208214	down	no	gi|743845751|ref|XM_011029265.1|	1862	E:0	PREDICTED: Populus euphratica ethylene-responsive transcription factor ERF014-like (LOC105127823), mRNA	gi|566156958|ref|XP_006386376.1|	327	E:4e-108	AP2 domain-containing transcription factor family protein [Populus trichocarpa]	ERF13_ARATH	125	E:1e-31	RecName: Full=Ethylene-responsive transcription factor ERF013;^Eukaryota; Viridiplantae; Streptophyta; Embryophyta; Tracheophyta; Spermatophyta; Magnoliophyta; eudicotyledons; Gunneridae; Pentapetalae; rosids; malvids; Brassicales; Brassicaceae; Camelineae; Arabidopsis	ERF12_ARATH	151	E:2e-43	RecName: Full=Ethylene-responsive transcription factor ERF012;^Eukaryota; Viridiplantae; Streptophyta; Embryophyta; Tracheophyta; Spermatophyta; Magnoliophyta; eudicotyledons; Gunneridae; Pentapetalae; rosids; malvids; Brassicales; Brassicaceae; Camelineae; Arabidopsis	PF00847.19	AP2	AP2 domain	ENOG410YX49	Transcription factor	GO:0071497|cellular response to freezing;GO:0034605|cellular response to heat;GO:0009873|ethylene-activated signaling pathway;GO:0045893|positive regulation of transcription, DNA-templated;GO:0009753|response to jasmonic acid;GO:0009751|response to salicylic acid;GO:0006351|transcription, DNA-templatedGO:0006355|regulation of transcription, DNA-templated	GO:0043565|sequence-specific DNA binding;GO:0003700|transcription factor activity, sequence-specific DNA binding;GO:0044212|transcription regulatory region DNA bindingGO:0003700|transcription factor activity, sequence-specific DNA binding	GO:0005634|nucleus	.
	f13p60_1056_30338	0.971421	0.0563693	up	no	2.16196	2.38482e-07	up	yes	3.86111	1.90492e-40	up	yes	1.14912	NA	up	no	0.264044	0.404017	up	no	gi|566176320|ref|XM_006381525.1|	1694	E:0	Populus trichocarpa AP2 domain-containing transcription factor family protein (POPTR_0006s14100g) mRNA, complete cds	gi|148372128|gb|ABQ62995.1|	419	E:7e-145	RAP2-like protein [Populus trichocarpa]	ERF17_ARATH	182	E:3e-54	RecName: Full=Ethylene-responsive transcription factor ERF017;^Eukaryota; Viridiplantae; Streptophyta; Embryophyta; Tracheophyta; Spermatophyta; Magnoliophyta; eudicotyledons; Gunneridae; Pentapetalae; rosids; malvids; Brassicales; Brassicaceae; Camelineae; Arabidopsis	ERF17_ARATH	189	E:6e-59	RecName: Full=Ethylene-responsive transcription factor ERF017;^Eukaryota; Viridiplantae; Streptophyta; Embryophyta; Tracheophyta; Spermatophyta; Magnoliophyta; eudicotyledons; Gunneridae; Pentapetalae; rosids; malvids; Brassicales; Brassicaceae; Camelineae; Arabidopsis	PF00847.19	AP2	AP2 domain	ENOG410YNX4	Transcription factor	GO:0009873|ethylene-activated signaling pathway;GO:0006351|transcription, DNA-templatedGO:0006355|regulation of transcription, DNA-templated	GO:0003677|DNA binding;GO:0003700|transcription factor activity, sequence-specific DNA bindingGO:0003700|transcription factor activity, sequence-specific DNA binding	GO:0005634|nucleus	.
	f2p60_697_33859	0.650054	0.00253667	up	no	0.851705	1.31176e-05	up	no	1.31449	1.13094e-12	up	yes	0.660026	0.0112596	up	no	0.259974	0.290093	up	no	gi|566179000|ref|XM_002310372.2|	1050	E:0	Populus trichocarpa hypothetical protein (POPTR_0007s01110g) mRNA, complete cds	gi|566179001|ref|XP_002310408.2|	175	E:2e-51	hypothetical protein POPTR_0007s01110g [Populus trichocarpa]	.	.	.	.	.	.	.	.	.	.	.	.	.	.	.	.	.
	f2p12_1146_9968	0.727045	0.115375	up	no	1.76712	0.000904628	up	no	2.82501	4.25672e-13	up	yes	0.725762	0.00768955	up	no	0.0586288	0.524768	up	no	gi|224088648|ref|XM_002308472.1|	1906	E:0	Populus trichocarpa hypothetical protein (POPTR_0006s23480g) mRNA, complete cds	gi|224088649|ref|XP_002308508.1|	338	E:1e-112	hypothetical protein POPTR_0006s23480g [Populus trichocarpa]	ERF17_ARATH	177	E:7e-52	RecName: Full=Ethylene-responsive transcription factor ERF017;^Eukaryota; Viridiplantae; Streptophyta; Embryophyta; Tracheophyta; Spermatophyta; Magnoliophyta; eudicotyledons; Gunneridae; Pentapetalae; rosids; malvids; Brassicales; Brassicaceae; Camelineae; Arabidopsis	ERF17_ARATH	182	E:3e-56	RecName: Full=Ethylene-responsive transcription factor ERF017;^Eukaryota; Viridiplantae; Streptophyta; Embryophyta; Tracheophyta; Spermatophyta; Magnoliophyta; eudicotyledons; Gunneridae; Pentapetalae; rosids; malvids; Brassicales; Brassicaceae; Camelineae; Arabidopsis	PF00847.19	AP2	AP2 domain	ENOG410YNX4	Transcription factor	GO:0009873|ethylene-activated signaling pathway;GO:0006351|transcription, DNA-templatedGO:0006355|regulation of transcription, DNA-templated	GO:0003677|DNA binding;GO:0003700|transcription factor activity, sequence-specific DNA bindingGO:0003700|transcription factor activity, sequence-specific DNA binding	GO:0005634|nucleus	.
	f5p60_1049_10884	1.21677	0.0273507	up	yes	1.18364	0.0248492	up	yes	3.69734	1.21664e-28	up	yes	1.01383	0.00145933	up	yes	0.285266	0.325242	up	no	gi|566176318|ref|XM_006381524.1|	1493	E:0	Populus trichocarpa AP2 domain-containing transcription factor family protein (POPTR_0006s14090g) mRNA, complete cds	gi|743893424|ref|XP_011039943.1|	417	E:2e-144	PREDICTED: ethylene-responsive transcription factor ERF017-like [Populus euphratica]	ERF17_ARATH	173	E:1e-50	RecName: Full=Ethylene-responsive transcription factor ERF017;^Eukaryota; Viridiplantae; Streptophyta; Embryophyta; Tracheophyta; Spermatophyta; Magnoliophyta; eudicotyledons; Gunneridae; Pentapetalae; rosids; malvids; Brassicales; Brassicaceae; Camelineae; Arabidopsis	ERF17_ARATH	173	E:2e-52	RecName: Full=Ethylene-responsive transcription factor ERF017;^Eukaryota; Viridiplantae; Streptophyta; Embryophyta; Tracheophyta; Spermatophyta; Magnoliophyta; eudicotyledons; Gunneridae; Pentapetalae; rosids; malvids; Brassicales; Brassicaceae; Camelineae; Arabidopsis	PF00847.19	AP2	AP2 domain	ENOG410YNX4	Transcription factor	GO:0009873|ethylene-activated signaling pathway;GO:0006351|transcription, DNA-templatedGO:0006355|regulation of transcription, DNA-templated	GO:0003677|DNA binding;GO:0003700|transcription factor activity, sequence-specific DNA bindingGO:0003700|transcription factor activity, sequence-specific DNA binding	GO:0005634|nucleus	.
	f8p60_1108_28852	3.49372	3.41828e-16	up	yes	3.72952	4.30819e-21	up	yes	5.45773	3.1086e-83	up	yes	1.18315	0.000208932	up	yes	0.198097	0.504128	up	no	gi|743917668|ref|XM_011004525.1|	1513	E:0	PREDICTED: Populus euphratica ethylene-responsive transcription factor ERF017-like (LOC105109735), mRNA	gi|224142933|ref|XP_002324785.1|	362	E:2e-122	hypothetical protein POPTR_0018s08320g [Populus trichocarpa]	ERF17_ARATH	167	E:3e-48	RecName: Full=Ethylene-responsive transcription factor ERF017;^Eukaryota; Viridiplantae; Streptophyta; Embryophyta; Tracheophyta; Spermatophyta; Magnoliophyta; eudicotyledons; Gunneridae; Pentapetalae; rosids; malvids; Brassicales; Brassicaceae; Camelineae; Arabidopsis	ERF17_ARATH	169	E:3e-51	RecName: Full=Ethylene-responsive transcription factor ERF017;^Eukaryota; Viridiplantae; Streptophyta; Embryophyta; Tracheophyta; Spermatophyta; Magnoliophyta; eudicotyledons; Gunneridae; Pentapetalae; rosids; malvids; Brassicales; Brassicaceae; Camelineae; Arabidopsis	PF00847.19	AP2	AP2 domain	ENOG410YNX4	Transcription factor	GO:0009873|ethylene-activated signaling pathway;GO:0006351|transcription, DNA-templatedGO:0006355|regulation of transcription, DNA-templated	GO:0003677|DNA binding;GO:0003700|transcription factor activity, sequence-specific DNA bindingGO:0003700|transcription factor activity, sequence-specific DNA binding	GO:0005634|nucleus	.
	f3p60_1106_28890	0.377731	2.31966e-05	up	no	0.170574	0.0515173	up	no	-0.405289	8.65741e-05	down	no	-0.754639	1.15978e-12	down	no	-1.27668	8.52513e-22	down	yes	gi|743824884|ref|XM_011024063.1|	1736	E:0	PREDICTED: Populus euphratica ethylene-responsive transcription factor 2-like (LOC105124170), mRNA	gi|566162737|ref|XP_002304592.2|	469	E:6e-164	hypothetical protein POPTR_0003s15030g [Populus trichocarpa]	ERF2_NICSY	271	E:7e-88	RecName: Full=Ethylene-responsive transcription factor 2;^Eukaryota; Viridiplantae; Streptophyta; Embryophyta; Tracheophyta; Spermatophyta; Magnoliophyta; eudicotyledons; Gunneridae; Pentapetalae; asterids; lamiids; Solanales; Solanaceae; Nicotianoideae; Nicotianeae; Nicotiana	ERF2_NICSY	272	E:7e-90	RecName: Full=Ethylene-responsive transcription factor 2;^Eukaryota; Viridiplantae; Streptophyta; Embryophyta; Tracheophyta; Spermatophyta; Magnoliophyta; eudicotyledons; Gunneridae; Pentapetalae; asterids; lamiids; Solanales; Solanaceae; Nicotianoideae; Nicotianeae; Nicotiana	PF00847.19	AP2	AP2 domain	.	.	GO:0006952|defense response;GO:0009873|ethylene-activated signaling pathway;GO:0006351|transcription, DNA-templatedGO:0006355|regulation of transcription, DNA-templated	GO:0003677|DNA binding;GO:0003700|transcription factor activity, sequence-specific DNA bindingGO:0003700|transcription factor activity, sequence-specific DNA binding	GO:0005634|nucleus	.
	f3p48_1206_9192	0.521242	9.72224e-06	up	no	0.691592	3.47449e-09	up	no	1.06929	8.15798e-21	up	yes	0.599008	0.00365381	up	no	0.331382	0.0371424	up	no	gi|743901042|ref|XM_011045531.1|	1877	E:0	PREDICTED: Populus euphratica ethylene-responsive transcription factor 4-like (LOC105139171), mRNA	gi|402810643|gb|AFR11379.1|	239	E:2e-73	ERF4 [Populus x canadensis]	ERF78_ARATH	91.3	E:8e-20	RecName: Full=Ethylene-responsive transcription factor 4;^Eukaryota; Viridiplantae; Streptophyta; Embryophyta; Tracheophyta; Spermatophyta; Magnoliophyta; eudicotyledons; Gunneridae; Pentapetalae; rosids; malvids; Brassicales; Brassicaceae; Camelineae; Arabidopsis	ERF78_ARATH	141	E:1e-39	RecName: Full=Ethylene-responsive transcription factor 4;^Eukaryota; Viridiplantae; Streptophyta; Embryophyta; Tracheophyta; Spermatophyta; Magnoliophyta; eudicotyledons; Gunneridae; Pentapetalae; rosids; malvids; Brassicales; Brassicaceae; Camelineae; Arabidopsis	PF00847.19	AP2	AP2 domain	ENOG410YQ8J	Transcription factor	GO:0009873|ethylene-activated signaling pathway;GO:0009864|induced systemic resistance, jasmonic acid mediated signaling pathway;GO:0010105|negative regulation of ethylene-activated signaling pathway;GO:0045892|negative regulation of transcription, DNA-templated;GO:0009737|response to abscisic acid;GO:0010200|response to chitin;GO:0009723|response to ethylene;GO:0006351|transcription, DNA-templat…	GO:0043565|sequence-specific DNA binding;GO:0003700|transcription factor activity, sequence-specific DNA bindingGO:0003700|transcription factor activity, sequence-specific DNA binding	GO:0016604|nuclear body;GO:0005634|nucleus	K09286|EREBP; EREBP-like factor
	f2p60_925_11810	0.5071	1.65759e-05	up	no	0.790831	4.33926e-12	up	no	1.40949	2.00835e-42	up	yes	0.549856	0.0140987	up	no	0.109025	0.559103	up	no	gi|566179000|ref|XM_002310372.2|	1618	E:0	Populus trichocarpa hypothetical protein (POPTR_0007s01110g) mRNA, complete cds	gi|566179001|ref|XP_002310408.2|	365	E:2e-124	hypothetical protein POPTR_0007s01110g [Populus trichocarpa]	ERF80_ARATH	149	E:1e-41	RecName: Full=Ethylene-responsive transcription factor 9;^Eukaryota; Viridiplantae; Streptophyta; Embryophyta; Tracheophyta; Spermatophyta; Magnoliophyta; eudicotyledons; Gunneridae; Pentapetalae; rosids; malvids; Brassicales; Brassicaceae; Camelineae; Arabidopsis	ERF80_ARATH	154	E:4e-45	RecName: Full=Ethylene-responsive transcription factor 9;^Eukaryota; Viridiplantae; Streptophyta; Embryophyta; Tracheophyta; Spermatophyta; Magnoliophyta; eudicotyledons; Gunneridae; Pentapetalae; rosids; malvids; Brassicales; Brassicaceae; Camelineae; Arabidopsis	PF00847.19	AP2	AP2 domain	ENOG41116MF	Transcription factor	GO:0006952|defense response;GO:0009873|ethylene-activated signaling pathway;GO:0019760|glucosinolate metabolic process;GO:0006351|transcription, DNA-templatedGO:0006355|regulation of transcription, DNA-templated	GO:0043565|sequence-specific DNA binding;GO:0003700|transcription factor activity, sequence-specific DNA bindingGO:0003700|transcription factor activity, sequence-specific DNA binding	GO:0016020|membrane;GO:0005634|nucleus	K09286|EREBP; EREBP-like factor
	f8p60_993_30012	0.946905	3.02643e-18	up	no	0.712994	2.75317e-11	up	no	1.12071	1.24261e-24	up	yes	0.786712	9.62706e-10	up	no	0.405567	0.00606612	up	no	gi|566211361|ref|XM_006372671.1|	1626	E:0	Populus trichocarpa hypothetical protein (POPTR_0017s04540g) mRNA, complete cds	gi|566211362|ref|XP_006372733.1|	232	E:5e-72	hypothetical protein POPTR_0017s04540g [Populus trichocarpa]	ERF80_ARATH	103	E:2e-24	RecName: Full=Ethylene-responsive transcription factor 9;^Eukaryota; Viridiplantae; Streptophyta; Embryophyta; Tracheophyta; Spermatophyta; Magnoliophyta; eudicotyledons; Gunneridae; Pentapetalae; rosids; malvids; Brassicales; Brassicaceae; Camelineae; Arabidopsis	ERF80_ARATH	161	E:1e-47	RecName: Full=Ethylene-responsive transcription factor 9;^Eukaryota; Viridiplantae; Streptophyta; Embryophyta; Tracheophyta; Spermatophyta; Magnoliophyta; eudicotyledons; Gunneridae; Pentapetalae; rosids; malvids; Brassicales; Brassicaceae; Camelineae; Arabidopsis	PF00847.19	AP2	AP2 domain	ENOG41116MF	Transcription factor	GO:0006952|defense response;GO:0009873|ethylene-activated signaling pathway;GO:0019760|glucosinolate metabolic process;GO:0006351|transcription, DNA-templatedGO:0006355|regulation of transcription, DNA-templated	GO:0043565|sequence-specific DNA binding;GO:0003700|transcription factor activity, sequence-specific DNA bindingGO:0003700|transcription factor activity, sequence-specific DNA binding	GO:0016020|membrane;GO:0005634|nucleus	K09286|EREBP; EREBP-like factor
	f2p60_1381_26225	-0.565842	6.22332e-21	down	no	-1.09235	3.3665e-88	down	yes	-0.885039	1.28783e-42	down	no	-1.72576	NA	down	no	-1.81909	NA	down	no	gi|743791654|ref|XM_011043613.1|	2036	E:0	PREDICTED: Populus euphratica ethylene-responsive transcription factor ERF071-like (LOC105137755), mRNA	gi|224131080|ref|XP_002320996.1|	513	E:8e-179	hypothetical protein POPTR_0014s12090g [Populus trichocarpa]	RAP23_ARATH	122	E:3e-30	RecName: Full=Ethylene-responsive transcription factor RAP2-3;^Eukaryota; Viridiplantae; Streptophyta; Embryophyta; Tracheophyta; Spermatophyta; Magnoliophyta; eudicotyledons; Gunneridae; Pentapetalae; rosids; malvids; Brassicales; Brassicaceae; Camelineae; Arabidopsis	RAP23_ARATH	140	E:6e-38	RecName: Full=Ethylene-responsive transcription factor RAP2-3;^Eukaryota; Viridiplantae; Streptophyta; Embryophyta; Tracheophyta; Spermatophyta; Magnoliophyta; eudicotyledons; Gunneridae; Pentapetalae; rosids; malvids; Brassicales; Brassicaceae; Camelineae; Arabidopsis	PF00847.19	AP2	AP2 domain	ENOG41113EY	Transcription factor	GO:0008219|cell death;GO:0009873|ethylene-activated signaling pathway;GO:0010286|heat acclimation;GO:0045893|positive regulation of transcription, DNA-templated;GO:0009735|response to cytokinin;GO:0009723|response to ethylene;GO:0009753|response to jasmonic acid;GO:0051707|response to other organism;GO:0006351|transcription, DNA-templatedGO:0006355|regulation of transcription, DNA-templated	GO:0003677|DNA binding;GO:0043565|sequence-specific DNA binding;GO:0003700|transcription factor activity, sequence-specific DNA bindingGO:0003700|transcription factor activity, sequence-specific DNA binding	GO:0005737|cytoplasm;GO:0005634|nucleus;GO:0005886|plasma membrane	K09286|EREBP; EREBP-like factor
	f3p60_1128_28605	-1.27509	7.39379e-121	down	yes	-2.19955	0	down	yes	-2.46048	2.37269e-285	down	yes	-1.82869	1.9404e-196	down	yes	-1.39407	1.2788e-72	down	yes	gi|566185522|ref|XM_006380178.1|	1832	E:0	Populus trichocarpa AP2 domain transcription factor family protein (POPTR_0008s23260g) mRNA, complete cds	gi|566185523|ref|XP_006380240.1|	476	E:2e-166	AP2 domain transcription factor family protein [Populus trichocarpa]	RAP23_ARATH	146	E:2e-39	RecName: Full=Ethylene-responsive transcription factor RAP2-3;^Eukaryota; Viridiplantae; Streptophyta; Embryophyta; Tracheophyta; Spermatophyta; Magnoliophyta; eudicotyledons; Gunneridae; Pentapetalae; rosids; malvids; Brassicales; Brassicaceae; Camelineae; Arabidopsis	RAP23_ARATH	175	E:1e-51	RecName: Full=Ethylene-responsive transcription factor RAP2-3;^Eukaryota; Viridiplantae; Streptophyta; Embryophyta; Tracheophyta; Spermatophyta; Magnoliophyta; eudicotyledons; Gunneridae; Pentapetalae; rosids; malvids; Brassicales; Brassicaceae; Camelineae; Arabidopsis	PF00847.19	AP2	AP2 domain	ENOG41113EY	Transcription factor	GO:0008219|cell death;GO:0009873|ethylene-activated signaling pathway;GO:0010286|heat acclimation;GO:0045893|positive regulation of transcription, DNA-templated;GO:0009735|response to cytokinin;GO:0009723|response to ethylene;GO:0009753|response to jasmonic acid;GO:0051707|response to other organism;GO:0006351|transcription, DNA-templatedGO:0006355|regulation of transcription, DNA-templated	GO:0003677|DNA binding;GO:0043565|sequence-specific DNA binding;GO:0003700|transcription factor activity, sequence-specific DNA bindingGO:0003700|transcription factor activity, sequence-specific DNA binding	GO:0005737|cytoplasm;GO:0005634|nucleus;GO:0005886|plasma membrane	K09286|EREBP; EREBP-like factor
	f3p60_1327_26651	-0.978139	9.22159e-62	down	no	-1.29108	3.09819e-113	down	yes	-0.798218	1.09463e-19	down	no	-1.84821	2.13502e-13	down	yes	-2.4301	6.72811e-135	down	yes	gi|566159069|ref|XM_002301454.2|	2196	E:0	Populus trichocarpa hypothetical protein (POPTR_0002s20270g) mRNA, complete cds	gi|566159070|ref|XP_002301490.2|	522	E:0	hypothetical protein POPTR_0002s20270g [Populus trichocarpa]	RAP23_ARATH	122	E:3e-30	RecName: Full=Ethylene-responsive transcription factor RAP2-3;^Eukaryota; Viridiplantae; Streptophyta; Embryophyta; Tracheophyta; Spermatophyta; Magnoliophyta; eudicotyledons; Gunneridae; Pentapetalae; rosids; malvids; Brassicales; Brassicaceae; Camelineae; Arabidopsis	RAP23_ARATH	140	E:6e-38	RecName: Full=Ethylene-responsive transcription factor RAP2-3;^Eukaryota; Viridiplantae; Streptophyta; Embryophyta; Tracheophyta; Spermatophyta; Magnoliophyta; eudicotyledons; Gunneridae; Pentapetalae; rosids; malvids; Brassicales; Brassicaceae; Camelineae; Arabidopsis	PF00847.19	AP2	AP2 domain	ENOG41113EY	Transcription factor	GO:0008219|cell death;GO:0009873|ethylene-activated signaling pathway;GO:0010286|heat acclimation;GO:0045893|positive regulation of transcription, DNA-templated;GO:0009735|response to cytokinin;GO:0009723|response to ethylene;GO:0009753|response to jasmonic acid;GO:0051707|response to other organism;GO:0006351|transcription, DNA-templatedGO:0006355|regulation of transcription, DNA-templated	GO:0003677|DNA binding;GO:0043565|sequence-specific DNA binding;GO:0003700|transcription factor activity, sequence-specific DNA bindingGO:0003700|transcription factor activity, sequence-specific DNA binding	GO:0005737|cytoplasm;GO:0005634|nucleus;GO:0005886|plasma membrane	K09286|EREBP; EREBP-like factor
AUX/IAA	f2p60_1238_27497	-1.36033	3.57596e-21	down	yes	-1.68728	1.66531e-31	down	yes	-0.665192	1.31497e-06	down	no	-1.08603	2.37901e-08	down	yes	-0.871733	6.37918e-08	down	no	gi|566156228|ref|XM_002302039.2|	1988	E:0	Populus trichocarpa auxin-induced protein aux28 (POPTR_0002s04580g) mRNA, complete cds	gi|224066307|ref|XP_002302075.1|	447	E:9e-155	auxin-induced protein aux28 [Populus trichocarpa]	AUX28_SOYBN	307	E:5e-101	RecName: Full=Auxin-induced protein AUX28;^Eukaryota; Viridiplantae; Streptophyta; Embryophyta; Tracheophyta; Spermatophyta; Magnoliophyta; eudicotyledons; Gunneridae; Pentapetalae; rosids; fabids; Fabales; Fabaceae; Papilionoideae; Phaseoleae; Glycine; Soja	AUX28_SOYBN	337	E:2e-115	RecName: Full=Auxin-induced protein AUX28;^Eukaryota; Viridiplantae; Streptophyta; Embryophyta; Tracheophyta; Spermatophyta; Magnoliophyta; eudicotyledons; Gunneridae; Pentapetalae; rosids; fabids; Fabales; Fabaceae; Papilionoideae; Phaseoleae; Glycine; Soja	PF02309.15	AUX_IAA	AUX/IAA family	ENOG410YEC3	Aux IAA proteins are short-lived transcriptional factors that function as repressors of early auxin response genes at low auxin concentrations. Repression is thought to result from the interaction with auxin response factors (ARFs), proteins that bind to the auxin-responsive promoter element (AuxRE). Formation of heterodimers with ARF proteins may alter their ability to modulate early auxin respo…	GO:0009734|auxin-activated signaling pathway;GO:0006355|regulation of transcription, DNA-templated;GO:0006351|transcription, DNA-templated	.	GO:0005634|nucleus	K14484|IAA; auxin-responsive protein IAA
	f2p35_1291_8541	-0.382801	0.000629506	down	no	-1.81625	2.56027e-44	down	yes	-0.508018	3.1253e-05	down	no	-0.598309	0.00169691	down	no	-0.831315	1.97268e-10	down	no	gi|566184253|ref|XM_006379802.1|	2298	E:0	Populus trichocarpa hypothetical protein (POPTR_0008s16100g) mRNA, complete cds	gi|566184254|ref|XP_006379864.1|	466	E:4e-162	hypothetical protein POPTR_0008s16100g [Populus trichocarpa]	AX22B_VIGRR	253	E:2e-80	RecName: Full=Auxin-induced protein 22B;^Eukaryota; Viridiplantae; Streptophyta; Embryophyta; Tracheophyta; Spermatophyta; Magnoliophyta; eudicotyledons; Gunneridae; Pentapetalae; rosids; fabids; Fabales; Fabaceae; Papilionoideae; Phaseoleae; Vigna	AX22B_VIGRR	253	E:1e-82	RecName: Full=Auxin-induced protein 22B;^Eukaryota; Viridiplantae; Streptophyta; Embryophyta; Tracheophyta; Spermatophyta; Magnoliophyta; eudicotyledons; Gunneridae; Pentapetalae; rosids; fabids; Fabales; Fabaceae; Papilionoideae; Phaseoleae; Vigna	PF02309.15	AUX_IAA	AUX/IAA family	.	.	GO:0009734|auxin-activated signaling pathway;GO:0006355|regulation of transcription, DNA-templated;GO:0006351|transcription, DNA-templated	.	GO:0005634|nucleus	.
	f2p60_1154_28359	-1.12276	1.40945e-38	down	yes	-1.64177	1.4139e-81	down	yes	-0.691469	3.03741e-16	down	no	-0.597918	0.000664647	down	no	-0.672595	3.19436e-15	down	no	gi|566199307|ref|XM_002319606.2|	1834	E:0	Populus trichocarpa auxin-induced protein IAA4 (POPTR_0013s03860g) mRNA, complete cds	gi|224125652|ref|XP_002319642.1|	395	E:3e-135	auxin-induced protein IAA4 [Populus trichocarpa]	AX22B_VIGRR	251	E:4e-80	RecName: Full=Auxin-induced protein 22B;^Eukaryota; Viridiplantae; Streptophyta; Embryophyta; Tracheophyta; Spermatophyta; Magnoliophyta; eudicotyledons; Gunneridae; Pentapetalae; rosids; fabids; Fabales; Fabaceae; Papilionoideae; Phaseoleae; Vigna	AX22B_VIGRR	256	E:6e-85	RecName: Full=Auxin-induced protein 22B;^Eukaryota; Viridiplantae; Streptophyta; Embryophyta; Tracheophyta; Spermatophyta; Magnoliophyta; eudicotyledons; Gunneridae; Pentapetalae; rosids; fabids; Fabales; Fabaceae; Papilionoideae; Phaseoleae; Vigna	PF02309.15	AUX_IAA	AUX/IAA family	.	.	GO:0009734|auxin-activated signaling pathway;GO:0006355|regulation of transcription, DNA-templated;GO:0006351|transcription, DNA-templated	.	GO:0005634|nucleus	.
	f3p60_1198_27882	-0.56401	0.00111548	down	no	-1.2563	3.15149e-11	down	yes	-0.202915	0.208735	down	no	-0.499994	0.0020961	down	no	-0.35459	0.0226648	down	no	gi|566169660|ref|XM_006382735.1|	1877	E:0	Populus trichocarpa auxin-induced protein IAA4 (POPTR_0005s05550g) mRNA, complete cds	gi|506954080|gb|AGM20676.1|	415	E:2e-141	IAA4 [Populus tomentosa]	AX22B_VIGRR	244	E:3e-77	RecName: Full=Auxin-induced protein 22B;^Eukaryota; Viridiplantae; Streptophyta; Embryophyta; Tracheophyta; Spermatophyta; Magnoliophyta; eudicotyledons; Gunneridae; Pentapetalae; rosids; fabids; Fabales; Fabaceae; Papilionoideae; Phaseoleae; Vigna	AX22B_VIGRR	257	E:2e-85	RecName: Full=Auxin-induced protein 22B;^Eukaryota; Viridiplantae; Streptophyta; Embryophyta; Tracheophyta; Spermatophyta; Magnoliophyta; eudicotyledons; Gunneridae; Pentapetalae; rosids; fabids; Fabales; Fabaceae; Papilionoideae; Phaseoleae; Vigna	PF02309.15	AUX_IAA	AUX/IAA family	.	.	GO:0009734|auxin-activated signaling pathway;GO:0006355|regulation of transcription, DNA-templated;GO:0006351|transcription, DNA-templated	.	GO:0005634|nucleus	.
	f2p60_795_32509	-0.637163	1.54708e-06	down	no	-1.30103	1.15712e-23	down	yes	-0.840503	4.01429e-10	down	no	-0.396444	0.0018535	down	no	-0.701424	1.15911e-07	down	no	gi|566184452|ref|XM_002311662.2|	1362	E:0	Populus trichocarpa bodenlos family protein (POPTR_0008s17220g) mRNA, complete cds	gi|566184453|ref|XP_002311698.2|	318	E:7e-106	bodenlos family protein [Populus trichocarpa]	IAA13_ARATH	182	E:2e-54	RecName: Full=Auxin-responsive protein IAA13;^Eukaryota; Viridiplantae; Streptophyta; Embryophyta; Tracheophyta; Spermatophyta; Magnoliophyta; eudicotyledons; Gunneridae; Pentapetalae; rosids; malvids; Brassicales; Brassicaceae; Camelineae; Arabidopsis	IAA13_ARATH	182	E:4e-56	RecName: Full=Auxin-responsive protein IAA13;^Eukaryota; Viridiplantae; Streptophyta; Embryophyta; Tracheophyta; Spermatophyta; Magnoliophyta; eudicotyledons; Gunneridae; Pentapetalae; rosids; malvids; Brassicales; Brassicaceae; Camelineae; Arabidopsis	PF02309.15	AUX_IAA	AUX/IAA family	ENOG410YK71	auxin-responsive protein	GO:0009734|auxin-activated signaling pathway;GO:0009733|response to auxin;GO:0006351|transcription, DNA-templated	GO:0003700|transcription factor activity, sequence-specific DNA binding	GO:0005634|nucleus	K14484|IAA; auxin-responsive protein IAA
	f2p60_1260_27281	-1.45043	2.58083e-73	down	yes	-1.69487	1.29638e-93	down	yes	-0.793796	4.47297e-23	down	no	-0.978215	NA	down	no	-0.7897	1.53008e-11	down	no	gi|566184255|ref|XM_002311622.2|	2143	E:0	Populus trichocarpa aux/IAA family protein (POPTR_0008s16110g) mRNA, complete cds	gi|224099883|ref|XP_002311658.1|	506	E:1e-177	aux/IAA family protein [Populus trichocarpa]	IAA14_ARATH	342	E:1e-114	RecName: Full=Auxin-responsive protein IAA14;^Eukaryota; Viridiplantae; Streptophyta; Embryophyta; Tracheophyta; Spermatophyta; Magnoliophyta; eudicotyledons; Gunneridae; Pentapetalae; rosids; malvids; Brassicales; Brassicaceae; Camelineae; Arabidopsis	IAA14_ARATH	343	E:8e-118	RecName: Full=Auxin-responsive protein IAA14;^Eukaryota; Viridiplantae; Streptophyta; Embryophyta; Tracheophyta; Spermatophyta; Magnoliophyta; eudicotyledons; Gunneridae; Pentapetalae; rosids; malvids; Brassicales; Brassicaceae; Camelineae; Arabidopsis	PF02309.15	AUX_IAA	AUX/IAA family	ENOG410YEC3	Aux IAA proteins are short-lived transcriptional factors that function as repressors of early auxin response genes at low auxin concentrations. Repression is thought to result from the interaction with auxin response factors (ARFs), proteins that bind to the auxin-responsive promoter element (AuxRE). Formation of heterodimers with ARF proteins may alter their ability to modulate early auxin respo…	GO:0009734|auxin-activated signaling pathway;GO:0010102|lateral root morphogenesis;GO:0045892|negative regulation of transcription, DNA-templated;GO:0009733|response to auxin;GO:0006351|transcription, DNA-templated	GO:0003700|transcription factor activity, sequence-specific DNA binding	GO:0005634|nucleus	K14484|IAA; auxin-responsive protein IAA
	f4p60_1581_24629	1.25435	5.10241e-32	up	yes	-0.135407	0.281709	down	no	0.00933736	0.941468	up	no	-0.0666158	0.591302	down	no	-0.165283	0.199122	down	no	gi|566160907|ref|XM_002303261.2|	2665	E:0	Populus trichocarpa auxin-responsive protein IAA27 (POPTR_0003s04980g) mRNA, complete cds	gi|224070929|ref|XP_002303297.1|	605	E:0	auxin-responsive protein IAA27 [Populus trichocarpa]	IAA27_ARATH	298	E:5e-95	RecName: Full=Auxin-responsive protein IAA27;^Eukaryota; Viridiplantae; Streptophyta; Embryophyta; Tracheophyta; Spermatophyta; Magnoliophyta; eudicotyledons; Gunneridae; Pentapetalae; rosids; malvids; Brassicales; Brassicaceae; Camelineae; Arabidopsis	IAA27_ARATH	326	E:2e-108	RecName: Full=Auxin-responsive protein IAA27;^Eukaryota; Viridiplantae; Streptophyta; Embryophyta; Tracheophyta; Spermatophyta; Magnoliophyta; eudicotyledons; Gunneridae; Pentapetalae; rosids; malvids; Brassicales; Brassicaceae; Camelineae; Arabidopsis	PF02309.15	AUX_IAA	AUX/IAA family	ENOG410YEX5	auxin-responsive protein	GO:0009734|auxin-activated signaling pathway;GO:0009733|response to auxin;GO:0006351|transcription, DNA-templated	GO:0003700|transcription factor activity, sequence-specific DNA binding	GO:0005634|nucleus	K14484|IAA; auxin-responsive protein IAA
BHLH	f2p56_3115_1603	-0.675234	3.31792e-32	down	no	-1.19738	7.56389e-85	down	yes	-0.882982	6.68488e-38	down	no	-0.266628	0.00046187	down	no	-0.235341	0.00537775	down	no	gi|566175313|ref|XM_002309048.2|	5463	E:0	Populus trichocarpa hypothetical protein (POPTR_0006s09100g) mRNA, complete cds	gi|224090793|ref|XP_002309084.1|	1416	E:0	hypothetical protein POPTR_0006s09100g [Populus trichocarpa]	LHWL1_ARATH	196	E:9e-51	RecName: Full=Transcription factor EMB1444 {ECO:0000303|PubMed:12586866};^Eukaryota; Viridiplantae; Streptophyta; Embryophyta; Tracheophyta; Spermatophyta; Magnoliophyta; eudicotyledons; Gunneridae; Pentapetalae; rosids; malvids; Brassicales; Brassicaceae; Camelineae; Arabidopsis	LHWL1_ARATH	196	E:6e-52	RecName: Full=Transcription factor EMB1444 {ECO:0000303|PubMed:12586866};^Eukaryota; Viridiplantae; Streptophyta; Embryophyta; Tracheophyta; Spermatophyta; Magnoliophyta; eudicotyledons; Gunneridae; Pentapetalae; rosids; malvids; Brassicales; Brassicaceae; Camelineae; Arabidopsis	PF14215.5	bHLH-MYC_N	bHLH-MYC and R2R3-MYB transcription factors N-terminal	ENOG410Z7Z7	Pentatricopeptide repeat-containing protein	GO:0035556|intracellular signal transduction;GO:0006468|protein phosphorylation;GO:0006355|regulation of transcription, DNA-templated;GO:0048364|root development;GO:0006351|transcription, DNA-templated	GO:0003677|DNA binding;GO:0046983|protein dimerization activity;GO:0004674|protein serine/threonine kinase activity	GO:0005829|cytosol;GO:0005634|nucleus	.
	f2p60_1567_24745	1.18307	6.1358e-70	up	yes	0.511597	9.74036e-13	up	no	0.159706	0.0462695	up	no	0.305433	0.000625571	up	no	0.367043	0.000139471	up	no	gi|566214937|ref|XM_002324972.2|	2772	E:0	Populus trichocarpa hypothetical protein (POPTR_0018s09060g) mRNA, complete cds	gi|566214938|ref|XP_002325008.2|	647	E:0	hypothetical protein POPTR_0018s09060g [Populus trichocarpa]	BH068_ARATH	280	E:7e-87	RecName: Full=Transcription factor bHLH68;^Eukaryota; Viridiplantae; Streptophyta; Embryophyta; Tracheophyta; Spermatophyta; Magnoliophyta; eudicotyledons; Gunneridae; Pentapetalae; rosids; malvids; Brassicales; Brassicaceae; Camelineae; Arabidopsis	BH068_ARATH	314	E:1e-101	RecName: Full=Transcription factor bHLH68;^Eukaryota; Viridiplantae; Streptophyta; Embryophyta; Tracheophyta; Spermatophyta; Magnoliophyta; eudicotyledons; Gunneridae; Pentapetalae; rosids; malvids; Brassicales; Brassicaceae; Camelineae; Arabidopsis	.	.	.	ENOG410YDA0	Transcription factor	GO:0006355|regulation of transcription, DNA-templated;GO:0006366|transcription from RNA polymerase II promoter	GO:0001046|core promoter sequence-specific DNA binding;GO:0046983|protein dimerization activity;GO:0003700|transcription factor activity, sequence-specific DNA binding;GO:0001228|transcriptional activator activity, RNA polymerase II transcription regulatory region sequence-specific binding	GO:0005634|nucleus	.
	f2p60_750_13363	-1.42596	1.64307e-10	down	yes	-1.52003	1.04164e-11	down	yes	-0.952424	8.41572e-07	down	no	-0.978313	7.98705e-05	down	no	-1.34601	5.03809e-10	down	yes	gi|566201412|ref|XM_002319369.2|	1245	E:0	Populus trichocarpa hypothetical protein (POPTR_0013s15020g) mRNA, complete cds	gi|224124720|ref|XP_002319405.1|	273	E:3e-90	hypothetical protein POPTR_0013s15020g [Populus trichocarpa]	.	.	.	.	SCRM2_ARATH	52.4	E:3e-07	RecName: Full=Transcription factor SCREAM2;^Eukaryota; Viridiplantae; Streptophyta; Embryophyta; Tracheophyta; Spermatophyta; Magnoliophyta; eudicotyledons; Gunneridae; Pentapetalae; rosids; malvids; Brassicales; Brassicaceae; Camelineae; Arabidopsis	.	.	.	ENOG4111GT2	inducer of cbf expression	GO:0010444|guard mother cell differentiation;GO:0006355|regulation of transcription, DNA-templated;GO:0050826|response to freezing;GO:0006351|transcription, DNA-templated	GO:0003677|DNA binding;GO:0046983|protein dimerization activity;GO:0003700|transcription factor activity, sequence-specific DNA binding	GO:0005634|nucleus	.
	f2p60_450_37002	-0.411695	0.289995	down	no	-0.794099	0.0513806	down	no	-0.440738	0.211777	down	no	-1.04204	0.00134966	down	yes	-0.556383	0.0906071	down	no	gi|566195313|ref|XM_002316935.2|	769	E:0	Populus trichocarpa basic helix-loop-helix family protein (POPTR_0011s13580g) mRNA, complete cds	gi|224115202|ref|XP_002316971.1|	112	E:5e-28	basic helix-loop-helix family protein [Populus trichocarpa]	ILR3_ARATH	87.8	E:4e-20	RecName: Full=Transcription factor ILR3;^Eukaryota; Viridiplantae; Streptophyta; Embryophyta; Tracheophyta; Spermatophyta; Magnoliophyta; eudicotyledons; Gunneridae; Pentapetalae; rosids; malvids; Brassicales; Brassicaceae; Camelineae; Arabidopsis	.	.	.	.	.	.	.	ENOG4111M4Q	Transcription factor	GO:0019760|glucosinolate metabolic process;GO:0006355|regulation of transcription, DNA-templated;GO:0006351|transcription, DNA-templated	GO:0046983|protein dimerization activity;GO:0043565|sequence-specific DNA binding;GO:0003700|transcription factor activity, sequence-specific DNA binding	GO:0005634|nucleus	.
	f2p60_1358_26343	-0.254601	0.00149207	down	no	-0.687327	4.04144e-18	down	no	-0.630119	1.18409e-12	down	no	-0.908605	2.64236e-08	down	no	-1.04844	9.77283e-25	down	yes	gi|566157370|ref|XM_002302317.2|	2314	E:0	Populus trichocarpa hypothetical protein (POPTR_0002s10910g) mRNA, complete cds	gi|224067096|ref|XP_002302353.1|	662	E:0	hypothetical protein POPTR_0002s10910g [Populus trichocarpa]	BH093_ARATH	235	E:4e-71	RecName: Full=Transcription factor bHLH93;^Eukaryota; Viridiplantae; Streptophyta; Embryophyta; Tracheophyta; Spermatophyta; Magnoliophyta; eudicotyledons; Gunneridae; Pentapetalae; rosids; malvids; Brassicales; Brassicaceae; Camelineae; Arabidopsis	BH093_ARATH	268	E:4e-85	RecName: Full=Transcription factor bHLH93;^Eukaryota; Viridiplantae; Streptophyta; Embryophyta; Tracheophyta; Spermatophyta; Magnoliophyta; eudicotyledons; Gunneridae; Pentapetalae; rosids; malvids; Brassicales; Brassicaceae; Camelineae; Arabidopsis	PF00010.25	HLH	Helix-loop-helix DNA-binding domain	ENOG410YB4F	Transcription factor	GO:0045487|gibberellin catabolic process;GO:0007275|multicellular organism development;GO:0010371|regulation of gibberellin biosynthetic process;GO:0006351|transcription, DNA-templated	GO:0003677|DNA binding;GO:0046983|protein dimerization activity;GO:0003700|transcription factor activity, sequence-specific DNA bindingGO:0046983|protein dimerization activity	GO:0005634|nucleus	.
	f2p47_1948_22288	0.341113	0.00562504	up	no	-1.31179	5.3334e-20	down	yes	-0.916109	2.19803e-10	down	no	-1.26158	4.8746e-17	down	yes	-1.2571	4.8584e-18	down	yes	gi|566151340|ref|XM_002298410.2|	3267	E:0	Populus trichocarpa hypothetical protein (POPTR_0001s27680g) mRNA, complete cds	gi|224055255|ref|XP_002298446.1|	793	E:0	hypothetical protein POPTR_0001s27680g [Populus trichocarpa]	BH130_ARATH	198	E:1e-55	RecName: Full=Transcription factor bHLH130;^Eukaryota; Viridiplantae; Streptophyta; Embryophyta; Tracheophyta; Spermatophyta; Magnoliophyta; eudicotyledons; Gunneridae; Pentapetalae; rosids; malvids; Brassicales; Brassicaceae; Camelineae; Arabidopsis	BH130_ARATH	199	E:7e-58	RecName: Full=Transcription factor bHLH130;^Eukaryota; Viridiplantae; Streptophyta; Embryophyta; Tracheophyta; Spermatophyta; Magnoliophyta; eudicotyledons; Gunneridae; Pentapetalae; rosids; malvids; Brassicales; Brassicaceae; Camelineae; Arabidopsis	PF00010.25	HLH	Helix-loop-helix DNA-binding domain	ENOG410YDYN	Transcription factor	GO:0048573|photoperiodism, flowering;GO:0006355|regulation of transcription, DNA-templated;GO:0006366|transcription from RNA polymerase II promoter	GO:0001046|core promoter sequence-specific DNA binding;GO:0046983|protein dimerization activity;GO:0003700|transcription factor activity, sequence-specific DNA binding;GO:0001228|transcriptional activator activity, RNA polymerase II transcription regulatory region sequence-specific bindingGO:0046983|protein dimerization activity	GO:0005634|nucleus	.
	f3p60_3154_19036	-0.398214	0.0260403	down	no	-1.09211	5.57199e-09	down	yes	-0.812233	2.24788e-05	down	no	-0.390146	0.0195931	down	no	-0.190677	0.301639	down	no	gi|566162634|ref|XM_002303643.2|	5413	E:0	Populus trichocarpa hypothetical protein (POPTR_0003s14480g) mRNA, complete cds	gi|224072264|ref|XP_002303679.1|	1642	E:0	hypothetical protein POPTR_0003s14480g [Populus trichocarpa]	LHWL2_ARATH	243	E:2e-68	RecName: Full=Transcription factor bHLH157;^Eukaryota; Viridiplantae; Streptophyta; Embryophyta; Tracheophyta; Spermatophyta; Magnoliophyta; eudicotyledons; Gunneridae; Pentapetalae; rosids; malvids; Brassicales; Brassicaceae; Camelineae; Arabidopsis	LHWL2_ARATH	243	E:3e-69	RecName: Full=Transcription factor bHLH157;^Eukaryota; Viridiplantae; Streptophyta; Embryophyta; Tracheophyta; Spermatophyta; Magnoliophyta; eudicotyledons; Gunneridae; Pentapetalae; rosids; malvids; Brassicales; Brassicaceae; Camelineae; Arabidopsis	PF14215.5	bHLH-MYC_N	bHLH-MYC and R2R3-MYB transcription factors N-terminal	ENOG41104WK	Transcription factor	GO:0071365|cellular response to auxin stimulus;GO:0035556|intracellular signal transduction;GO:0007140|male meiotic nuclear division;GO:0051321|meiotic cell cycle;GO:0090058|metaxylem development;GO:0006468|protein phosphorylation;GO:0048364|root development;GO:0048316|seed development;GO:0006351|transcription, DNA-templated	GO:0003677|DNA binding;GO:0046983|protein dimerization activity;GO:0004674|protein serine/threonine kinase activity;GO:0003700|transcription factor activity, sequence-specific DNA binding	GO:0005829|cytosol;GO:0005634|nucleus	.
	f2p20_1522_6925	1.1363	1.53803e-06	up	yes	0.907215	8.14687e-05	up	no	1.31026	4.80459e-10	up	yes	0.738478	0.00485281	up	no	0.990336	3.61178e-05	up	no	gi|743822275|ref|XM_011023352.1|	2507	E:0	PREDICTED: Populus euphratica transcription factor EMB1444-like (LOC105123658), transcript variant X2, mRNA	gi|224108141|ref|XP_002314734.1|	710	E:0	hypothetical protein POPTR_0010s10650g [Populus trichocarpa]	RSS3_ORYSJ	134	E:4e-33	RecName: Full=Protein RICE SALT SENSITIVE 3 {ECO:0000303|PubMed:23715469};^Eukaryota; Viridiplantae; Streptophyta; Embryophyta; Tracheophyta; Spermatophyta; Magnoliophyta; Liliopsida; Poales; Poaceae; BOP clade; Oryzoideae; Oryzeae; Oryzinae; Oryza	RSS3_ORYSJ	135	E:6e-34	RecName: Full=Protein RICE SALT SENSITIVE 3 {ECO:0000303|PubMed:23715469};^Eukaryota; Viridiplantae; Streptophyta; Embryophyta; Tracheophyta; Spermatophyta; Magnoliophyta; Liliopsida; Poales; Poaceae; BOP clade; Oryzoideae; Oryzeae; Oryzinae; Oryza	PF14215.5	bHLH-MYC_N	bHLH-MYC and R2R3-MYB transcription factors N-terminal	ENOG410YAU9	NA	GO:0035556|intracellular signal transduction;GO:0006468|protein phosphorylation	GO:0004674|protein serine/threonine kinase activity	GO:0005829|cytosol	.
bZip	f5p60_870_31556	-0.710645	2.73905e-07	down	no	-0.575229	6.87397e-06	down	no	1.08658	8.66809e-25	up	yes	1.07217	1.87205e-14	up	yes	1.86082	2.49213e-84	up	yes	gi|743797841|ref|XM_011010838.1|	1443	E:0	PREDICTED: Populus euphratica basic leucine zipper 43-like (LOC105114321), mRNA	gi|224111822|ref|XP_002315989.1|	377	E:1e-129	bZIP family protein [Populus trichocarpa]	BZP43_ARATH	109	E:3e-27	RecName: Full=Basic leucine zipper 43 {ECO:0000303|PubMed:11906833};^Eukaryota; Viridiplantae; Streptophyta; Embryophyta; Tracheophyta; Spermatophyta; Magnoliophyta; eudicotyledons; Gunneridae; Pentapetalae; rosids; malvids; Brassicales; Brassicaceae; Camelineae; Arabidopsis	BZP43_ARATH	127	E:4e-35	RecName: Full=Basic leucine zipper 43 {ECO:0000303|PubMed:11906833};^Eukaryota; Viridiplantae; Streptophyta; Embryophyta; Tracheophyta; Spermatophyta; Magnoliophyta; eudicotyledons; Gunneridae; Pentapetalae; rosids; malvids; Brassicales; Brassicaceae; Camelineae; Arabidopsis	PF07716.14	bZIP_2	Basic region leucine zipper	ENOG410YWTI	Transcription factor	GO:0006351|transcription, DNA-templatedGO:0006355|regulation of transcription, DNA-templated	GO:0003677|DNA binding;GO:0003700|transcription factor activity, sequence-specific DNA bindingGO:0003700|transcription factor activity, sequence-specific DNA binding	GO:0005634|nucleus	.
C2C2	f2p60_1469_7402	-1.83907	2.36069e-28	down	yes	0.128226	0.27384	up	no	0.480857	2.88895e-05	up	no	0.678218	1.56858e-08	up	no	1.08653	2.04074e-23	up	yes	gi|41323975|gb|AY515150.1|	2536	E:0	Populus deltoides CONSTANS-like protein CO1 mRNA, complete cds	gi|41323976|gb|AAS00054.1|	693	E:0	CONSTANS-like protein CO1 [Populus deltoides]	COL2_ARATH	338	E:2e-110	RecName: Full=Zinc finger protein CONSTANS-LIKE 2;^Eukaryota; Viridiplantae; Streptophyta; Embryophyta; Tracheophyta; Spermatophyta; Magnoliophyta; eudicotyledons; Gunneridae; Pentapetalae; rosids; malvids; Brassicales; Brassicaceae; Camelineae; Arabidopsis	COL2_ARATH	425	E:2e-145	RecName: Full=Zinc finger protein CONSTANS-LIKE 2;^Eukaryota; Viridiplantae; Streptophyta; Embryophyta; Tracheophyta; Spermatophyta; Magnoliophyta; eudicotyledons; Gunneridae; Pentapetalae; rosids; malvids; Brassicales; Brassicaceae; Camelineae; Arabidopsis	PF00643.23	zf-B_box	B-box zinc finger	COG5641	Transcription factor	GO:0009658|chloroplast organization;GO:0009909|regulation of flower development;GO:0009416|response to light stimulus;GO:0006351|transcription, DNA-templated	GO:0003677|DNA binding;GO:0003700|transcription factor activity, sequence-specific DNA binding;GO:0008270|zinc ion bindingGO:0008270|zinc ion binding;GO:0005515|protein binding	GO:0005634|nucleusGO:0005622|intracellular	.
	f3p60_1428_7616	-1.72482	1.60035e-26	down	yes	0.379846	0.000780917	up	no	0.472587	5.87113e-05	up	no	0.419114	0.000294732	up	no	0.809868	2.27725e-13	up	no	gi|41323975|gb|AY515150.1|	2305	E:0	Populus deltoides CONSTANS-like protein CO1 mRNA, complete cds	gi|41323976|gb|AAS00054.1|	641	E:0	CONSTANS-like protein CO1 [Populus deltoides]	COL2_ARATH	340	E:2e-111	RecName: Full=Zinc finger protein CONSTANS-LIKE 2;^Eukaryota; Viridiplantae; Streptophyta; Embryophyta; Tracheophyta; Spermatophyta; Magnoliophyta; eudicotyledons; Gunneridae; Pentapetalae; rosids; malvids; Brassicales; Brassicaceae; Camelineae; Arabidopsis	COL2_ARATH	427	E:3e-147	RecName: Full=Zinc finger protein CONSTANS-LIKE 2;^Eukaryota; Viridiplantae; Streptophyta; Embryophyta; Tracheophyta; Spermatophyta; Magnoliophyta; eudicotyledons; Gunneridae; Pentapetalae; rosids; malvids; Brassicales; Brassicaceae; Camelineae; Arabidopsis	PF00643.23	zf-B_box	B-box zinc finger	COG5641	Transcription factor	GO:0009658|chloroplast organization;GO:0009909|regulation of flower development;GO:0009416|response to light stimulus;GO:0006351|transcription, DNA-templated	GO:0003677|DNA binding;GO:0003700|transcription factor activity, sequence-specific DNA binding;GO:0008270|zinc ion bindingGO:0008270|zinc ion binding;GO:0005515|protein binding	GO:0005634|nucleusGO:0005622|intracellular	.
	f8p60_1473_7558	-1.1926	1.72558e-76	down	yes	-0.766537	2.48982e-41	down	no	-0.166844	0.00851615	down	no	-0.0528896	0.514254	down	no	0.0667691	0.360616	up	no	gi|566213962|ref|XM_002324900.2|	2556	E:0	Populus trichocarpa CONSTANS-like protein 2 (POPTR_0018s03110g) mRNA, complete cds	gi|224143378|ref|XP_002324936.1|	632	E:0	CONSTANS-like protein 2 [Populus trichocarpa]	COL4_ARATH	341	E:2e-111	RecName: Full=Zinc finger protein CONSTANS-LIKE 4;^Eukaryota; Viridiplantae; Streptophyta; Embryophyta; Tracheophyta; Spermatophyta; Magnoliophyta; eudicotyledons; Gunneridae; Pentapetalae; rosids; malvids; Brassicales; Brassicaceae; Camelineae; Arabidopsis	COL4_ARATH	380	E:3e-128	RecName: Full=Zinc finger protein CONSTANS-LIKE 4;^Eukaryota; Viridiplantae; Streptophyta; Embryophyta; Tracheophyta; Spermatophyta; Magnoliophyta; eudicotyledons; Gunneridae; Pentapetalae; rosids; malvids; Brassicales; Brassicaceae; Camelineae; Arabidopsis	PF00643.23	zf-B_box	B-box zinc finger	COG5641	Transcription factor	GO:0009909|regulation of flower development;GO:0009416|response to light stimulus	GO:0008270|zinc ion bindingGO:0008270|zinc ion binding;GO:0005515|protein binding	GO:0005634|nucleusGO:0005622|intracellular	.
	f4p60_1731_23714	-0.972433	2.03995e-32	down	no	-1.66693	3.18174e-90	down	yes	-0.188726	0.0146953	down	no	0.113138	0.114077	up	no	0.514249	2.00969e-10	up	no	gi|743936589|ref|XM_011014383.1|	2848	E:0	PREDICTED: Populus euphratica zinc finger protein CONSTANS-LIKE 5-like (LOC105116882), mRNA	gi|743936590|ref|XP_011012685.1|	694	E:0	PREDICTED: zinc finger protein CONSTANS-LIKE 5-like [Populus euphratica]	COL5_ARATH	316	E:1e-100	RecName: Full=Zinc finger protein CONSTANS-LIKE 5;^Eukaryota; Viridiplantae; Streptophyta; Embryophyta; Tracheophyta; Spermatophyta; Magnoliophyta; eudicotyledons; Gunneridae; Pentapetalae; rosids; malvids; Brassicales; Brassicaceae; Camelineae; Arabidopsis	COL5_ARATH	364	E:4e-122	RecName: Full=Zinc finger protein CONSTANS-LIKE 5;^Eukaryota; Viridiplantae; Streptophyta; Embryophyta; Tracheophyta; Spermatophyta; Magnoliophyta; eudicotyledons; Gunneridae; Pentapetalae; rosids; malvids; Brassicales; Brassicaceae; Camelineae; Arabidopsis	PF00643.23	zf-B_box	B-box zinc finger	COG5641	Transcription factor	GO:0009909|regulation of flower development;GO:0006355|regulation of transcription, DNA-templated;GO:0009416|response to light stimulus	GO:0003700|transcription factor activity, sequence-specific DNA binding;GO:0008270|zinc ion bindingGO:0008270|zinc ion binding;GO:0005515|protein binding	GO:0005634|nucleusGO:0005622|intracellular	.
	f2p60_1604_24470	-0.182027	0.560732	down	no	-2.17069	2.35883e-08	down	yes	-1.04521	0.000761277	down	yes	-1.7555	1.78609e-08	down	yes	-1.56062	3.76858e-07	down	yes	gi|743825794|ref|XM_011024336.1|	2582	E:0	PREDICTED: Populus euphratica uncharacterized LOC105124351 (LOC105124351), mRNA	gi|224075000|ref|XP_002304512.1|	624	E:0	hypothetical protein POPTR_0003s13050g [Populus trichocarpa]	COL3_ARATH	60.8	E:7e-09	RecName: Full=Zinc finger protein CONSTANS-LIKE 3;^Eukaryota; Viridiplantae; Streptophyta; Embryophyta; Tracheophyta; Spermatophyta; Magnoliophyta; eudicotyledons; Gunneridae; Pentapetalae; rosids; malvids; Brassicales; Brassicaceae; Camelineae; Arabidopsis	COL3_ARATH	62	E:2e-09	RecName: Full=Zinc finger protein CONSTANS-LIKE 3;^Eukaryota; Viridiplantae; Streptophyta; Embryophyta; Tracheophyta; Spermatophyta; Magnoliophyta; eudicotyledons; Gunneridae; Pentapetalae; rosids; malvids; Brassicales; Brassicaceae; Camelineae; Arabidopsis	PF06203.13	CCT	CCT motif	COG5641	Transcription factor	GO:0010161|red light signaling pathway;GO:0009909|regulation of flower development;GO:0010099|regulation of photomorphogenesis	GO:0043565|sequence-specific DNA binding;GO:0003700|transcription factor activity, sequence-specific DNA binding;GO:0008270|zinc ion bindingGO:0005515|protein binding	GO:0005634|nucleus	.
	f3p60_1878_4842	-1.93988	1.41562e-08	down	yes	-0.454698	0.095964	down	no	-0.519469	0.0477478	down	no	-0.375377	0.128602	down	no	-0.243593	0.350347	down	no	gi|566206212|ref|XM_006374306.1|	3325	E:0	Populus trichocarpa hypothetical protein (POPTR_0015s06480g) mRNA, complete cds	gi|566206213|ref|XP_006374368.1|	858	E:0	hypothetical protein POPTR_0015s06480g [Populus trichocarpa]	COL6_ARATH	273	E:3e-83	RecName: Full=Zinc finger protein CONSTANS-LIKE 6;^Eukaryota; Viridiplantae; Streptophyta; Embryophyta; Tracheophyta; Spermatophyta; Magnoliophyta; eudicotyledons; Gunneridae; Pentapetalae; rosids; malvids; Brassicales; Brassicaceae; Camelineae; Arabidopsis	COL6_ARATH	274	E:1e-85	RecName: Full=Zinc finger protein CONSTANS-LIKE 6;^Eukaryota; Viridiplantae; Streptophyta; Embryophyta; Tracheophyta; Spermatophyta; Magnoliophyta; eudicotyledons; Gunneridae; Pentapetalae; rosids; malvids; Brassicales; Brassicaceae; Camelineae; Arabidopsis	PF00643.23	zf-B_box	B-box zinc finger	COG5641	Transcription factor	GO:0006355|regulation of transcription, DNA-templated	GO:0003700|transcription factor activity, sequence-specific DNA binding;GO:0008270|zinc ion bindingGO:0008270|zinc ion binding;GO:0005515|protein binding	GO:0005634|nucleusGO:0005622|intracellular	.
	f2p60_1586_24574	-0.077282	0.671276	down	no	0.949408	7.25781e-11	up	no	0.982171	8.58682e-11	up	no	1.05615	3.46094e-13	up	yes	1.20687	2.81573e-19	up	yes	gi|566165980|ref|XM_002305271.2|	2521	E:0	Populus trichocarpa CONSTANS-like protein CO2 (POPTR_0004s10800g) mRNA, complete cds	gi|224077570|ref|XP_002305307.1|	585	E:0	CONSTANS-like protein CO2 [Populus trichocarpa]	CONS_ARATH	299	E:1e-94	RecName: Full=Zinc finger protein CONSTANS {ECO:0000303|PubMed:7697715};^Eukaryota; Viridiplantae; Streptophyta; Embryophyta; Tracheophyta; Spermatophyta; Magnoliophyta; eudicotyledons; Gunneridae; Pentapetalae; rosids; malvids; Brassicales; Brassicaceae; Camelineae; Arabidopsis	COL2_ARATH	404	E:4e-138	RecName: Full=Zinc finger protein CONSTANS-LIKE 2;^Eukaryota; Viridiplantae; Streptophyta; Embryophyta; Tracheophyta; Spermatophyta; Magnoliophyta; eudicotyledons; Gunneridae; Pentapetalae; rosids; malvids; Brassicales; Brassicaceae; Camelineae; Arabidopsis	PF00643.23	zf-B_box	B-box zinc finger	COG5641	Transcription factor	GO:0009658|chloroplast organization;GO:0009909|regulation of flower development;GO:0009416|response to light stimulus;GO:0006351|transcription, DNA-templated	GO:0003677|DNA binding;GO:0003700|transcription factor activity, sequence-specific DNA binding;GO:0008270|zinc ion bindingGO:0008270|zinc ion binding;GO:0005515|protein binding	GO:0005634|nucleusGO:0005622|intracellular	.
	f3p60_1089_29115	0.246796	0.306413	up	no	-0.126419	0.612763	down	no	1.47247	2.52334e-15	up	yes	1.5377	3.20093e-19	up	yes	1.88565	7.88273e-23	up	yes	gi|566154213|ref|XM_006370300.1|	1716	E:0	Populus trichocarpa hypothetical protein (POPTR_0001s41970g) mRNA, complete cds	gi|566154214|ref|XP_006370362.1|	402	E:3e-137	hypothetical protein POPTR_0001s41970g [Populus trichocarpa]	MIP1A_ARATH	59.3	E:2e-09	RecName: Full=B-box domain protein 30 {ECO:0000303|PubMed:19920209};^Eukaryota; Viridiplantae; Streptophyta; Embryophyta; Tracheophyta; Spermatophyta; Magnoliophyta; eudicotyledons; Gunneridae; Pentapetalae; rosids; malvids; Brassicales; Brassicaceae; Camelineae; Arabidopsis	MIP1A_ARATH	60.1	E:3e-10	RecName: Full=B-box domain protein 30 {ECO:0000303|PubMed:19920209};^Eukaryota; Viridiplantae; Streptophyta; Embryophyta; Tracheophyta; Spermatophyta; Magnoliophyta; eudicotyledons; Gunneridae; Pentapetalae; rosids; malvids; Brassicales; Brassicaceae; Camelineae; Arabidopsis	PF00643.23	zf-B_box	B-box zinc finger	ENOG411168W	BBOX	GO:0007623|circadian rhythm;GO:0009909|regulation of flower development	GO:0030674|protein binding, bridging;GO:0008270|zinc ion bindingGO:0008270|zinc ion binding	GO:0005634|nucleusGO:0005622|intracellular	.
	f2p60_996_11381	1.06237	4.50328e-09	up	yes	0.890027	2.0465e-07	up	no	1.00152	4.6025e-09	up	yes	0.832531	8.24856e-07	up	no	0.650676	0.00022092	up	no	gi|566188454|ref|XM_006377965.1|	1628	E:0	Populus trichocarpa hypothetical protein (POPTR_0010s00360g) mRNA, complete cds	gi|566188457|ref|XP_006378028.1|	214	E:9e-66	hypothetical protein POPTR_0010s00360g [Populus trichocarpa]	GAT15_ARATH	137	E:1e-37	RecName: Full=GATA transcription factor 15;^Eukaryota; Viridiplantae; Streptophyta; Embryophyta; Tracheophyta; Spermatophyta; Magnoliophyta; eudicotyledons; Gunneridae; Pentapetalae; rosids; malvids; Brassicales; Brassicaceae; Camelineae; Arabidopsis	GAT15_ARATH	152	E:2e-45	RecName: Full=GATA transcription factor 15;^Eukaryota; Viridiplantae; Streptophyta; Embryophyta; Tracheophyta; Spermatophyta; Magnoliophyta; eudicotyledons; Gunneridae; Pentapetalae; rosids; malvids; Brassicales; Brassicaceae; Camelineae; Arabidopsis	PF00320.26	GATA	GATA zinc finger	COG5641	Transcription factor	GO:0030154|cell differentiationGO:0006355|regulation of transcription, DNA-templated	GO:0003682|chromatin binding;GO:0000977|RNA polymerase II regulatory region sequence-specific DNA binding;GO:0001085|RNA polymerase II transcription factor binding;GO:0003700|transcription factor activity, sequence-specific DNA binding;GO:0001228|transcriptional activator activity, RNA polymerase II transcription regulatory region sequence-specific binding;GO:0008270|zinc ion bindingGO:0003700|tr…	GO:0005634|nucleus;GO:0005667|transcription factor complex	.
	f3p60_1620_24355	-1.70089	2.33354e-48	down	yes	-0.983743	6.11836e-22	down	no	-1.35231	1.35481e-23	down	yes	-0.723239	1.40363e-06	down	no	-0.550821	1.95488e-08	down	no	gi|566187675|ref|XM_002313727.2|	2832	E:0	Populus trichocarpa hypothetical protein (POPTR_0009s12620g) mRNA, complete cds	gi|566187676|ref|XP_002313763.2|	573	E:0	hypothetical protein POPTR_0009s12620g [Populus trichocarpa]	GATA5_ARATH	178	E:4e-49	RecName: Full=GATA transcription factor 5;^Eukaryota; Viridiplantae; Streptophyta; Embryophyta; Tracheophyta; Spermatophyta; Magnoliophyta; eudicotyledons; Gunneridae; Pentapetalae; rosids; malvids; Brassicales; Brassicaceae; Camelineae; Arabidopsis	GATA5_ARATH	203	E:1e-60	RecName: Full=GATA transcription factor 5;^Eukaryota; Viridiplantae; Streptophyta; Embryophyta; Tracheophyta; Spermatophyta; Magnoliophyta; eudicotyledons; Gunneridae; Pentapetalae; rosids; malvids; Brassicales; Brassicaceae; Camelineae; Arabidopsis	PF00320.26	GATA	GATA zinc finger	COG5641	Transcription factor	GO:0030154|cell differentiationGO:0006355|regulation of transcription, DNA-templated	GO:0003682|chromatin binding;GO:0000977|RNA polymerase II regulatory region sequence-specific DNA binding;GO:0001085|RNA polymerase II transcription factor binding;GO:0003700|transcription factor activity, sequence-specific DNA binding;GO:0001228|transcriptional activator activity, RNA polymerase II transcription regulatory region sequence-specific binding;GO:0008270|zinc ion bindingGO:0003700|tr…	GO:0005634|nucleus;GO:0005667|transcription factor complex	.
C2H2	f2p60_1530_6943	-1.06643	3.29781e-70	down	yes	-0.84042	3.83094e-48	down	no	-0.524264	1.047e-17	down	no	-0.334325	0.00207147	down	no	-0.310346	4.85773e-06	down	no	gi|566150975|ref|XM_002299783.2|	2599	E:0	Populus trichocarpa hypothetical protein (POPTR_0001s25700g) mRNA, complete cds	gi|566150976|ref|XP_002299819.2|	770	E:0	hypothetical protein POPTR_0001s25700g [Populus trichocarpa]	.	.	.	.	.	.	.	.	PF00096.25	zf-C2H2	Zinc finger, C2H2 type	.	.	.	.	.	.
	f3p60_2366_3070	-1.2206	7.34676e-70	down	yes	-0.998429	1.28423e-61	down	no	-1.27385	4.08332e-46	down	yes	-0.961468	1.02216e-33	down	no	-0.940734	4.24194e-24	down	no	gi|743840035|ref|XM_011027796.1|	3897	E:0	PREDICTED: Populus euphratica zinc finger protein NUTCRACKER-like (LOC105126807), mRNA	gi|566156284|ref|XP_002302090.2|	867	E:0	hypothetical protein POPTR_0002s04880g [Populus trichocarpa]	IDD12_ARATH	361	E:6e-115	RecName: Full=Protein indeterminate-domain 12 {ECO:0000303|PubMed:16784536};^Eukaryota; Viridiplantae; Streptophyta; Embryophyta; Tracheophyta; Spermatophyta; Magnoliophyta; eudicotyledons; Gunneridae; Pentapetalae; rosids; malvids; Brassicales; Brassicaceae; Camelineae; Arabidopsis	IDD12_ARATH	386	E:9e-129	RecName: Full=Protein indeterminate-domain 12 {ECO:0000303|PubMed:16784536};^Eukaryota; Viridiplantae; Streptophyta; Embryophyta; Tracheophyta; Spermatophyta; Magnoliophyta; eudicotyledons; Gunneridae; Pentapetalae; rosids; malvids; Brassicales; Brassicaceae; Camelineae; Arabidopsis	PF00096.25	zf-C2H2	Zinc finger, C2H2 type	COG5048	Zinc finger protein	GO:0006355|regulation of transcription, DNA-templated;GO:0006351|transcription, DNA-templated	GO:0003677|DNA binding;GO:0046872|metal ion binding;GO:0003700|transcription factor activity, sequence-specific DNA binding	.	.
	f2p23_2302_3270	1.26525	1.35979e-33	up	yes	0.365519	0.00157276	up	no	0.11559	0.370735	up	no	-0.047879	0.706194	down	no	0.112076	0.345347	up	no	gi|743913409|ref|XM_011002311.1|	3563	E:0	PREDICTED: Populus euphratica probable protein arginine N-methyltransferase 3 (LOC105108124), mRNA	gi|566147616|ref|XP_002299193.2|	953	E:0	arginine N-methyltransferase family protein [Populus trichocarpa]	ANM3_ARATH	547	E:0	RecName: Full=Probable protein arginine N-methyltransferase 3;^Eukaryota; Viridiplantae; Streptophyta; Embryophyta; Tracheophyta; Spermatophyta; Magnoliophyta; eudicotyledons; Gunneridae; Pentapetalae; rosids; malvids; Brassicales; Brassicaceae; Camelineae; Arabidopsis	ANM3_ARATH	132	E:5e-35	RecName: Full=Probable protein arginine N-methyltransferase 3;^Eukaryota; Viridiplantae; Streptophyta; Embryophyta; Tracheophyta; Spermatophyta; Magnoliophyta; eudicotyledons; Gunneridae; Pentapetalae; rosids; malvids; Brassicales; Brassicaceae; Camelineae; Arabidopsis	PF12756.6	zf-C2H2_2	C2H2 type zinc-finger (2 copies)	ENOG410XQYH	Protein arginine n-methyltransferase	GO:0006355|regulation of transcription, DNA-templated	GO:0008469|histone-arginine N-methyltransferase activity;GO:0046872|metal ion binding;GO:0003676|nucleic acid binding;GO:0035242|protein-arginine omega-N asymmetric methyltransferase activity	GO:0005829|cytosol	K11436|PRMT3; protein arginine N-methyltransferase 3 [EC:2.1.1.-];K11436|PRMT3; protein arginine N-methyltransferase 3 [EC:2.1.1.-]
	f2p60_1123_10067	0.863716	2.80233e-13	up	no	1.16339	3.35733e-27	up	yes	1.0573	2.95694e-19	up	yes	0.908759	2.55456e-07	up	no	0.125634	0.505499	up	no	gi|566187114|ref|XM_002313871.2|	1886	E:0	Populus trichocarpa hypothetical protein (POPTR_0009s09250g) mRNA, complete cds	gi|224105711|ref|XP_002313907.1|	275	E:2e-87	hypothetical protein POPTR_0009s09250g [Populus trichocarpa]	AZF2_ARATH	120	E:1e-29	RecName: Full=Zinc finger protein AZF2;^Eukaryota; Viridiplantae; Streptophyta; Embryophyta; Tracheophyta; Spermatophyta; Magnoliophyta; eudicotyledons; Gunneridae; Pentapetalae; rosids; malvids; Brassicales; Brassicaceae; Camelineae; Arabidopsis	ZAT10_ARATH	175	E:2e-51	RecName: Full=Zinc finger protein ZAT10;^Eukaryota; Viridiplantae; Streptophyta; Embryophyta; Tracheophyta; Spermatophyta; Magnoliophyta; eudicotyledons; Gunneridae; Pentapetalae; rosids; malvids; Brassicales; Brassicaceae; Camelineae; Arabidopsis	PF13912.5	zf-C2H2_6	C2H2-type zinc finger	COG5048	Zinc finger protein	GO:0035264|multicellular organism growth;GO:0045892|negative regulation of transcription, DNA-templated;GO:0010117|photoprotection;GO:0015979|photosynthesis;GO:0009737|response to abscisic acid;GO:0010200|response to chitin;GO:0009409|response to cold;GO:0009644|response to high light intensity;GO:0006979|response to oxidative stress;GO:0009651|response to salt stress;GO:0009414|response to water…	GO:0046872|metal ion binding;GO:0043565|sequence-specific DNA binding;GO:0003700|transcription factor activity, sequence-specific DNA binding	GO:0005634|nucleus	.
	f2p60_1926_22412	-0.600524	4.6336e-17	down	no	-1.01763	1.82162e-47	down	yes	-0.724181	7.86745e-21	down	no	-0.580421	1.66725e-13	down	no	-0.454299	1.81653e-06	down	no	gi|566240884|ref|XM_002325527.2|	3408	E:0	Populus trichocarpa zinc finger family protein (POPTR_0019s11520g) mRNA, complete cds	gi|224145204|ref|XP_002325563.1|	875	E:0	zinc finger family protein [Populus trichocarpa]	STOP1_ARATH	480	E:2e-161	RecName: Full=Protein SENSITIVE TO PROTON RHIZOTOXICITY 1 {ECO:0000303|PubMed:17535918};^Eukaryota; Viridiplantae; Streptophyta; Embryophyta; Tracheophyta; Spermatophyta; Magnoliophyta; eudicotyledons; Gunneridae; Pentapetalae; rosids; malvids; Brassicales; Brassicaceae; Camelineae; Arabidopsis	STOP1_ARATH	553	E:0	RecName: Full=Protein SENSITIVE TO PROTON RHIZOTOXICITY 1 {ECO:0000303|PubMed:17535918};^Eukaryota; Viridiplantae; Streptophyta; Embryophyta; Tracheophyta; Spermatophyta; Magnoliophyta; eudicotyledons; Gunneridae; Pentapetalae; rosids; malvids; Brassicales; Brassicaceae; Camelineae; Arabidopsis	PF13912.5	zf-C2H2_6	C2H2-type zinc finger	COG5048	Zinc finger protein	GO:0006355|regulation of transcription, DNA-templated;GO:0010447|response to acidic pH;GO:0010044|response to aluminum ion;GO:0006351|transcription, DNA-templated	GO:0046872|metal ion binding;GO:0003676|nucleic acid binding;GO:0003700|transcription factor activity, sequence-specific DNA binding	GO:0005634|nucleus	.
	f2p17_1128_9942	1.06793	6.94619e-31	up	yes	1.18859	4.90877e-43	up	yes	0.5858	4.48464e-08	up	no	0.240091	0.143332	up	no	-0.452974	0.0364401	down	no	gi|743936089|ref|XM_011014128.1|	1663	E:0	PREDICTED: Populus euphratica zinc finger protein ZAT10 (LOC105116680), mRNA	gi|566151811|ref|XP_002300263.2|	330	E:2e-108	hypothetical protein POPTR_0001s30260g [Populus trichocarpa]	ZAT10_ARATH	123	E:3e-31	RecName: Full=Zinc finger protein ZAT10;^Eukaryota; Viridiplantae; Streptophyta; Embryophyta; Tracheophyta; Spermatophyta; Magnoliophyta; eudicotyledons; Gunneridae; Pentapetalae; rosids; malvids; Brassicales; Brassicaceae; Camelineae; Arabidopsis	ZAT10_ARATH	177	E:3e-52	RecName: Full=Zinc finger protein ZAT10;^Eukaryota; Viridiplantae; Streptophyta; Embryophyta; Tracheophyta; Spermatophyta; Magnoliophyta; eudicotyledons; Gunneridae; Pentapetalae; rosids; malvids; Brassicales; Brassicaceae; Camelineae; Arabidopsis	PF13912.5	zf-C2H2_6	C2H2-type zinc finger	COG5048	Zinc finger protein	GO:0035264|multicellular organism growth;GO:0045892|negative regulation of transcription, DNA-templated;GO:0010117|photoprotection;GO:0015979|photosynthesis;GO:0009737|response to abscisic acid;GO:0010200|response to chitin;GO:0009409|response to cold;GO:0009644|response to high light intensity;GO:0006979|response to oxidative stress;GO:0009651|response to salt stress;GO:0009414|response to water…	GO:0046872|metal ion binding;GO:0043565|sequence-specific DNA binding;GO:0003700|transcription factor activity, sequence-specific DNA binding	GO:0005634|nucleus	.
	f2p60_1062_10514	1.11517	2.24367e-15	up	yes	0.45209	0.00287356	up	no	1.01342	1.43171e-12	up	yes	0.287442	0.328907	up	no	-0.337674	0.177703	down	no	gi|743786677|ref|XM_011030499.1|	1616	E:0	PREDICTED: Populus euphratica zinc finger protein ZAT10-like (LOC105128710), mRNA	gi|743786678|ref|XP_011028801.1|	466	E:9e-163	PREDICTED: zinc finger protein ZAT10-like [Populus euphratica]	ZAT10_ARATH	190	E:2e-56	RecName: Full=Zinc finger protein ZAT10;^Eukaryota; Viridiplantae; Streptophyta; Embryophyta; Tracheophyta; Spermatophyta; Magnoliophyta; eudicotyledons; Gunneridae; Pentapetalae; rosids; malvids; Brassicales; Brassicaceae; Camelineae; Arabidopsis	ZAT10_ARATH	194	E:9e-60	RecName: Full=Zinc finger protein ZAT10;^Eukaryota; Viridiplantae; Streptophyta; Embryophyta; Tracheophyta; Spermatophyta; Magnoliophyta; eudicotyledons; Gunneridae; Pentapetalae; rosids; malvids; Brassicales; Brassicaceae; Camelineae; Arabidopsis	PF13912.5	zf-C2H2_6	C2H2-type zinc finger	COG5048	Zinc finger protein	GO:0035264|multicellular organism growth;GO:0045892|negative regulation of transcription, DNA-templated;GO:0010117|photoprotection;GO:0015979|photosynthesis;GO:0009737|response to abscisic acid;GO:0010200|response to chitin;GO:0009409|response to cold;GO:0009644|response to high light intensity;GO:0006979|response to oxidative stress;GO:0009651|response to salt stress;GO:0009414|response to water…	GO:0046872|metal ion binding;GO:0043565|sequence-specific DNA binding;GO:0003700|transcription factor activity, sequence-specific DNA binding	GO:0005634|nucleus	.
	f2p24_969_11433	2.27239	2.77233e-50	up	yes	2.2597	1.0403e-54	up	yes	1.36749	3.40643e-16	up	yes	0.731186	0.00159297	up	no	-0.885618	0.000278145	down	no	gi|566150725|ref|XM_002299855.2|	1365	E:0	Populus trichocarpa zinc finger family protein (POPTR_0001s24250g) mRNA, complete cds	gi|743912805|ref|XP_011000297.1|	351	E:4e-119	PREDICTED: zinc finger protein ZAT11 [Populus euphratica]	ZAT11_ARATH	129	E:2e-34	RecName: Full=Zinc finger protein ZAT11;^Eukaryota; Viridiplantae; Streptophyta; Embryophyta; Tracheophyta; Spermatophyta; Magnoliophyta; eudicotyledons; Gunneridae; Pentapetalae; rosids; malvids; Brassicales; Brassicaceae; Camelineae; Arabidopsis	ZAT11_ARATH	131	E:2e-36	RecName: Full=Zinc finger protein ZAT11;^Eukaryota; Viridiplantae; Streptophyta; Embryophyta; Tracheophyta; Spermatophyta; Magnoliophyta; eudicotyledons; Gunneridae; Pentapetalae; rosids; malvids; Brassicales; Brassicaceae; Camelineae; Arabidopsis	PF13912.5	zf-C2H2_6	C2H2-type zinc finger	COG5048	Zinc finger protein	GO:0071289|cellular response to nickel ion;GO:2000280|regulation of root development;GO:0006355|regulation of transcription, DNA-templated;GO:0010200|response to chitin;GO:0006351|transcription, DNA-templated	GO:0046872|metal ion binding;GO:0003676|nucleic acid binding;GO:0003700|transcription factor activity, sequence-specific DNA binding	GO:0005634|nucleus	.
	f2p60_1084_29151	1.9966	3.60208e-06	up	yes	1.67406	6.72766e-05	up	yes	0.823189	0.0314878	up	no	0.608486	0.070019	up	no	-0.419046	0.132694	down	no	gi|566150725|ref|XM_002299855.2|	1448	E:0	Populus trichocarpa zinc finger family protein (POPTR_0001s24250g) mRNA, complete cds	gi|743912805|ref|XP_011000297.1|	350	E:3e-118	PREDICTED: zinc finger protein ZAT11 [Populus euphratica]	ZAT11_ARATH	129	E:4e-34	RecName: Full=Zinc finger protein ZAT11;^Eukaryota; Viridiplantae; Streptophyta; Embryophyta; Tracheophyta; Spermatophyta; Magnoliophyta; eudicotyledons; Gunneridae; Pentapetalae; rosids; malvids; Brassicales; Brassicaceae; Camelineae; Arabidopsis	ZAT11_ARATH	131	E:2e-36	RecName: Full=Zinc finger protein ZAT11;^Eukaryota; Viridiplantae; Streptophyta; Embryophyta; Tracheophyta; Spermatophyta; Magnoliophyta; eudicotyledons; Gunneridae; Pentapetalae; rosids; malvids; Brassicales; Brassicaceae; Camelineae; Arabidopsis	PF13912.5	zf-C2H2_6	C2H2-type zinc finger	COG5048	Zinc finger protein	GO:0071289|cellular response to nickel ion;GO:2000280|regulation of root development;GO:0006355|regulation of transcription, DNA-templated;GO:0010200|response to chitin;GO:0006351|transcription, DNA-templated	GO:0046872|metal ion binding;GO:0003676|nucleic acid binding;GO:0003700|transcription factor activity, sequence-specific DNA binding	GO:0005634|nucleus	.
	f2p60_839_31992	0.88198	6.79914e-15	up	no	1.08934	8.49483e-28	up	yes	0.640133	1.1127e-05	up	no	0.720032	4.83217e-08	up	no	0.251219	0.0245078	up	no	gi|743844135|ref|XM_011028829.1|	1349	E:0	PREDICTED: Populus euphratica zinc finger protein ZAT11-like (LOC105127501), mRNA	gi|355477194|gb|AES12473.1|	372	E:2e-128	C2H2-type zinc finger protein 1 [Populus trichocarpa]	ZAT11_ARATH	129	E:6e-35	RecName: Full=Zinc finger protein ZAT11;^Eukaryota; Viridiplantae; Streptophyta; Embryophyta; Tracheophyta; Spermatophyta; Magnoliophyta; eudicotyledons; Gunneridae; Pentapetalae; rosids; malvids; Brassicales; Brassicaceae; Camelineae; Arabidopsis	ZAT11_ARATH	130	E:3e-36	RecName: Full=Zinc finger protein ZAT11;^Eukaryota; Viridiplantae; Streptophyta; Embryophyta; Tracheophyta; Spermatophyta; Magnoliophyta; eudicotyledons; Gunneridae; Pentapetalae; rosids; malvids; Brassicales; Brassicaceae; Camelineae; Arabidopsis	PF13912.5	zf-C2H2_6	C2H2-type zinc finger	COG5048	Zinc finger protein	GO:0071289|cellular response to nickel ion;GO:2000280|regulation of root development;GO:0006355|regulation of transcription, DNA-templated;GO:0010200|response to chitin;GO:0006351|transcription, DNA-templated	GO:0046872|metal ion binding;GO:0003676|nucleic acid binding;GO:0003700|transcription factor activity, sequence-specific DNA binding	GO:0005634|nucleus	.
	f4p60_1631_24311	1.23648	4.48263e-26	up	yes	0.987009	6.98704e-17	up	no	0.034019	0.805581	up	no	-0.241487	0.225192	down	no	-0.675119	8.19343e-06	down	no	gi|566214054|ref|XM_002324919.2|	2796	E:0	Populus trichocarpa zinc finger family protein (POPTR_0018s03670g) mRNA, complete cds	gi|566214055|ref|XP_002324955.2|	717	E:0	zinc finger family protein [Populus trichocarpa]	REIL1_ARATH	475	E:2e-162	RecName: Full=Cytoplasmic 60S subunit biogenesis factor REI1 homolog 1 {ECO:0000305};^Eukaryota; Viridiplantae; Streptophyta; Embryophyta; Tracheophyta; Spermatophyta; Magnoliophyta; eudicotyledons; Gunneridae; Pentapetalae; rosids; malvids; Brassicales; Brassicaceae; Camelineae; Arabidopsis	REIL1_ARATH	517	E:1e-180	RecName: Full=Cytoplasmic 60S subunit biogenesis factor REI1 homolog 1 {ECO:0000305};^Eukaryota; Viridiplantae; Streptophyta; Embryophyta; Tracheophyta; Spermatophyta; Magnoliophyta; eudicotyledons; Gunneridae; Pentapetalae; rosids; malvids; Brassicales; Brassicaceae; Camelineae; Arabidopsis	PF12171.7	zf-C2H2_jaz	Zinc-finger double-stranded RNA-binding	ENOG410XPH0	Zinc finger protein	GO:0042273|ribosomal large subunit biogenesis	GO:0003676|nucleic acid binding;GO:0008270|zinc ion binding	GO:0005737|cytoplasm	K14816|REI1; pre-60S factor REI1
	f3p60_1127_9905	1.10975	1.75773e-13	up	yes	0.457652	0.00496566	up	no	0.750104	5.60647e-06	up	no	0.0418567	0.841496	up	no	0.519721	0.0202549	up	no	gi|566198754|ref|XM_002319451.2|	1977	E:0	Populus trichocarpa hypothetical protein (POPTR_0013s01160g) mRNA, complete cds	gi|566198755|ref|XP_002319487.2|	281	E:2e-90	hypothetical protein POPTR_0013s01160g [Populus trichocarpa]	ZMAT2_MOUSE	146	E:4e-40	RecName: Full=Zinc finger matrin-type protein 2;^Eukaryota; Metazoa; Chordata; Craniata; Vertebrata; Euteleostomi; Mammalia; Eutheria; Euarchontoglires; Glires; Rodentia; Myomorpha; Muroidea; Muridae; Murinae; Mus; Mus	ZMAT2_MOUSE	169	E:1e-50	RecName: Full=Zinc finger matrin-type protein 2;^Eukaryota; Metazoa; Chordata; Craniata; Vertebrata; Euteleostomi; Mammalia; Eutheria; Euarchontoglires; Glires; Rodentia; Myomorpha; Muroidea; Muridae; Murinae; Mus; Mus	PF12171.7	zf-C2H2_jaz	Zinc-finger double-stranded RNA-binding	ENOG4111GW4	Zinc finger, matrin-type	GO:0000398|mRNA splicing, via spliceosome	GO:0003677|DNA binding;GO:0003723|RNA binding;GO:0008270|zinc ion binding	GO:0046540|U4/U6 x U5 tri-snRNP complex	K12848|SNU23; U4/U6.U5 tri-snRNP component SNU23
C3H	f9p60_1914_22738	-1.08907	1.94188e-76	down	yes	-0.811322	5.18895e-51	down	no	-0.36976	6.3028e-09	down	no	-0.306613	1.32166e-06	down	no	-0.214127	0.0388381	down	no	gi|118486133|gb|EF146867.1|	3280	E:0	Populus trichocarpa clone WS0121_F02 unknown mRNA	gi|118486134|gb|ABK94910.1|	698	E:0	unknown [Populus trichocarpa]	PRT1_ARATH	258	E:1e-83	RecName: Full=E3 ubiquitin-protein ligase PRT1;^Eukaryota; Viridiplantae; Streptophyta; Embryophyta; Tracheophyta; Spermatophyta; Magnoliophyta; eudicotyledons; Gunneridae; Pentapetalae; rosids; malvids; Brassicales; Brassicaceae; Camelineae; Arabidopsis	PRT1_ARATH	258	E:6e-80	RecName: Full=E3 ubiquitin-protein ligase PRT1;^Eukaryota; Viridiplantae; Streptophyta; Embryophyta; Tracheophyta; Spermatophyta; Magnoliophyta; eudicotyledons; Gunneridae; Pentapetalae; rosids; malvids; Brassicales; Brassicaceae; Camelineae; Arabidopsis	PF13920.5	zf-C3HC4_3	Zinc finger, C3HC4 type (RING finger)	ENOG410Y7D6	Zinc finger, ZZ type	GO:0071596|ubiquitin-dependent protein catabolic process via the N-end rule pathway	GO:0061630|ubiquitin protein ligase activity;GO:0008270|zinc ion bindingGO:0046872|metal ion binding	GO:0005737|cytoplasm	.
	f2p15_1769_5447	-1.19231	1.86547e-32	down	yes	-0.805855	8.34557e-23	down	no	-0.48949	5.67297e-08	down	no	-0.20979	0.0231515	down	no	0.0365021	0.638427	up	no	gi|566157971|ref|XM_006386490.1|	2863	E:0	Populus trichocarpa hypothetical protein (POPTR_0002s14140g) mRNA, complete cds	gi|566157972|ref|XP_006386552.1|	763	E:0	hypothetical protein POPTR_0002s14140g [Populus trichocarpa]	RNF12_HUMAN	73.9	E:2e-12	RecName: Full=E3 ubiquitin-protein ligase RLIM;^Eukaryota; Metazoa; Chordata; Craniata; Vertebrata; Euteleostomi; Mammalia; Eutheria; Euarchontoglires; Primates; Haplorrhini; Catarrhini; Hominidae; Homo	RF12B_XENLA	77.4	E:1e-13	RecName: Full=E3 ubiquitin-protein ligase RNF12-B;^Eukaryota; Metazoa; Chordata; Craniata; Vertebrata; Euteleostomi; Amphibia; Batrachia; Anura; Pipoidea; Pipidae; Xenopodinae; Xenopus; Xenopus	PF12678.6	zf-rbx1	RING-H2 zinc finger domain	.	.	GO:0000578|embryonic axis specification;GO:0016567|protein ubiquitination;GO:0042787|protein ubiquitination involved in ubiquitin-dependent protein catabolic process;GO:0006511|ubiquitin-dependent protein catabolic process	GO:0042802|identical protein binding;GO:0046872|metal ion binding;GO:0008134|transcription factor binding;GO:0004842|ubiquitin-protein transferase activityGO:0008270|zinc ion binding;GO:0046872|metal ion binding	GO:0005634|nucleus	K16271|RLIM, RNF12; E3 ubiquitin-protein ligase RLIM [EC:2.3.2.27]
	f3p60_1782_23294	-1.5288	1.09742e-77	down	yes	-0.583802	1.02028e-17	down	no	-0.830018	4.51148e-25	down	no	-0.458209	2.6295e-08	down	no	-0.261922	0.00109787	down	no	gi|743826623|ref|XR_842056.1|	2693	E:0	PREDICTED: Populus euphratica E3 ubiquitin-protein ligase RING1-like (LOC105124498), transcript variant X1, misc_RNA	gi|224096141|ref|XP_002310548.1|	681	E:0	hypothetical protein POPTR_0007s04960g [Populus trichocarpa]	ATL55_ARATH	145	E:2e-37	RecName: Full=E3 ubiquitin-protein ligase RING1;^Eukaryota; Viridiplantae; Streptophyta; Embryophyta; Tracheophyta; Spermatophyta; Magnoliophyta; eudicotyledons; Gunneridae; Pentapetalae; rosids; malvids; Brassicales; Brassicaceae; Camelineae; Arabidopsis	ATL55_ARATH	146	E:9e-39	RecName: Full=E3 ubiquitin-protein ligase RING1;^Eukaryota; Viridiplantae; Streptophyta; Embryophyta; Tracheophyta; Spermatophyta; Magnoliophyta; eudicotyledons; Gunneridae; Pentapetalae; rosids; malvids; Brassicales; Brassicaceae; Camelineae; Arabidopsis	PF13639.5	zf-RING_2	Ring finger domain	ENOG41121N2	zinc ion binding	GO:0006952|defense response;GO:0043068|positive regulation of programmed cell death;GO:0012501|programmed cell death;GO:0043161|proteasome-mediated ubiquitin-dependent protein catabolic process;GO:0051865|protein autoubiquitination;GO:0016567|protein ubiquitination;GO:0009617|response to bacterium;GO:0010200|response to chitin;GO:0002238|response to molecule of fungal origin	GO:0046872|metal ion binding;GO:0061630|ubiquitin protein ligase activity;GO:0004842|ubiquitin-protein transferase activityGO:0008270|zinc ion binding;GO:0046872|metal ion binding;GO:0004842|ubiquitin-protein transferase activity	GO:0016021|integral component of membrane;GO:0005886|plasma membraneGO:0005680|anaphase-promoting complex	K10664|ATL6S; E3 ubiquitin-protein ligase ATL6/9/15/31/42/55 [EC:2.3.2.27]
	f2p60_1292_26965	0.64765	0.0279311	up	no	0.969741	0.000373926	up	no	0.712364	0.00807353	up	no	1.52896	1.52702e-11	up	yes	1.58939	3.57103e-08	up	yes	gi|566177734|ref|XM_002308461.2|	2191	E:0	Populus trichocarpa hypothetical protein (POPTR_0006s23270g) mRNA, complete cds	gi|224088615|ref|XP_002308497.1|	374	E:6e-125	hypothetical protein POPTR_0006s23270g [Populus trichocarpa]	SHGR9_ARATH	170	E:1e-47	RecName: Full=E3 ubiquitin-protein ligase SGR9, amyloplastic;^Eukaryota; Viridiplantae; Streptophyta; Embryophyta; Tracheophyta; Spermatophyta; Magnoliophyta; eudicotyledons; Gunneridae; Pentapetalae; rosids; malvids; Brassicales; Brassicaceae; Camelineae; Arabidopsis	SHGR9_ARATH	228	E:2e-71	RecName: Full=E3 ubiquitin-protein ligase SGR9, amyloplastic;^Eukaryota; Viridiplantae; Streptophyta; Embryophyta; Tracheophyta; Spermatophyta; Magnoliophyta; eudicotyledons; Gunneridae; Pentapetalae; rosids; malvids; Brassicales; Brassicaceae; Camelineae; Arabidopsis	PF13639.5	zf-RING_2	Ring finger domain	ENOG41121N2	zinc ion binding	GO:0009630|gravitropism;GO:0043161|proteasome-mediated ubiquitin-dependent protein catabolic process;GO:0000209|protein polyubiquitination;GO:0042787|protein ubiquitination involved in ubiquitin-dependent protein catabolic process	GO:0046872|metal ion binding;GO:0061630|ubiquitin protein ligase activity;GO:0004842|ubiquitin-protein transferase activity	GO:0009501|amyloplast	.
	f2p6_1632_24035	-1.48424	3.69286e-26	down	yes	-0.984195	7.07003e-14	down	no	-0.948331	2.39717e-11	down	no	-0.551371	8.91874e-06	down	no	-0.616749	3.90503e-05	down	no	gi|566191435|ref|XM_002316121.2|	2625	E:0	Populus trichocarpa hypothetical protein (POPTR_0010s18200g) mRNA, complete cds	gi|566191436|ref|XP_002316157.2|	338	E:8e-159	hypothetical protein POPTR_0010s18200g [Populus trichocarpa]	RGLG4_ARATH	234	E:2e-93	RecName: Full=E3 ubiquitin-protein ligase RGLG4 {ECO:0000305};^Eukaryota; Viridiplantae; Streptophyta; Embryophyta; Tracheophyta; Spermatophyta; Magnoliophyta; eudicotyledons; Gunneridae; Pentapetalae; rosids; malvids; Brassicales; Brassicaceae; Camelineae; Arabidopsis	RGLG4_ARATH	133	E:2e-36	RecName: Full=E3 ubiquitin-protein ligase RGLG4 {ECO:0000305};^Eukaryota; Viridiplantae; Streptophyta; Embryophyta; Tracheophyta; Spermatophyta; Magnoliophyta; eudicotyledons; Gunneridae; Pentapetalae; rosids; malvids; Brassicales; Brassicaceae; Camelineae; Arabidopsis	PF13920.5	zf-C3HC4_3	Zinc finger, C3HC4 type (RING finger)	ENOG410XPC8	copine family	GO:0042742|defense response to bacterium;GO:0009867|jasmonic acid mediated signaling pathway;GO:0009611|response to wounding	GO:0046872|metal ion binding;GO:0004842|ubiquitin-protein transferase activity	GO:0005737|cytoplasm;GO:0005634|nucleus	K16280|RGLG; E3 ubiquitin-protein ligase RGLG [EC:2.3.2.27];K16280|RGLG; E3 ubiquitin-protein ligase RGLG [EC:2.3.2.27]
	f2p60_1939_22319	-1.24605	7.25982e-99	down	yes	-1.12691	5.15402e-91	down	yes	-1.06398	3.73078e-62	down	yes	-0.68033	8.30902e-29	down	no	-0.38464	1.39787e-09	down	no	gi|743858561|ref|XM_011032195.1|	2623	E:0	PREDICTED: Populus euphratica putative E3 ubiquitin-protein ligase XBAT34 (LOC105129923), transcript variant X1, mRNA	gi|743858562|ref|XP_011030497.1|	686	E:0	PREDICTED: putative E3 ubiquitin-protein ligase XBAT34 [Populus euphratica]	XB34_ORYSJ	339	E:6e-120	RecName: Full=Probable E3 ubiquitin-protein ligase XBOS34;^Eukaryota; Viridiplantae; Streptophyta; Embryophyta; Tracheophyta; Spermatophyta; Magnoliophyta; Liliopsida; Poales; Poaceae; BOP clade; Oryzoideae; Oryzeae; Oryzinae; Oryza	XB35_ARATH	392	E:3e-131	RecName: Full=Putative E3 ubiquitin-protein ligase XBAT35;^Eukaryota; Viridiplantae; Streptophyta; Embryophyta; Tracheophyta; Spermatophyta; Magnoliophyta; eudicotyledons; Gunneridae; Pentapetalae; rosids; malvids; Brassicales; Brassicaceae; Camelineae; Arabidopsis	PF13920.5	zf-C3HC4_3	Zinc finger, C3HC4 type (RING finger)	ENOG410XNPA	protein ubiquitination	.	GO:0046872|metal ion binding;GO:0031625|ubiquitin protein ligase binding;GO:0004842|ubiquitin-protein transferase activity	GO:0005737|cytoplasm;GO:0005634|nucleus;GO:0000151|ubiquitin ligase complex	.
	f2p25_564_35839	0.23699	0.328052	up	no	1.16527	1.56282e-09	up	yes	0.145058	0.51623	up	no	0.163253	0.453638	up	no	0.483277	0.0202329	up	no	gi|566204681|ref|XM_006375523.1|	976	E:0	Populus trichocarpa hypothetical protein (POPTR_0014s16830g) mRNA, complete cds	gi|224131904|ref|XP_002321207.1|	219	E:6e-70	hypothetical protein POPTR_0014s16830g [Populus trichocarpa]	XERIC_ARATH	124	E:6e-34	RecName: Full=Probable E3 ubiquitin-protein ligase XERICO;^Eukaryota; Viridiplantae; Streptophyta; Embryophyta; Tracheophyta; Spermatophyta; Magnoliophyta; eudicotyledons; Gunneridae; Pentapetalae; rosids; malvids; Brassicales; Brassicaceae; Camelineae; Arabidopsis	XERIC_ARATH	123	E:6e-35	RecName: Full=Probable E3 ubiquitin-protein ligase XERICO;^Eukaryota; Viridiplantae; Streptophyta; Embryophyta; Tracheophyta; Spermatophyta; Magnoliophyta; eudicotyledons; Gunneridae; Pentapetalae; rosids; malvids; Brassicales; Brassicaceae; Camelineae; Arabidopsis	PF13920.5	zf-C3HC4_3	Zinc finger, C3HC4 type (RING finger)	ENOG41121N2	zinc ion binding	GO:0009688|abscisic acid biosynthetic process;GO:0009687|abscisic acid metabolic process;GO:0043161|proteasome-mediated ubiquitin-dependent protein catabolic process;GO:0010200|response to chitin;GO:0009739|response to gibberellin;GO:0006970|response to osmotic stress;GO:0009651|response to salt stress	GO:0046872|metal ion binding;GO:0061630|ubiquitin protein ligase activityGO:0046872|metal ion binding	GO:0016021|integral component of membrane	K16285|XERICO; RING/U-box domain-containing protein [EC:2.3.2.27]
GRAS	f2p60_2444_20532	-0.300356	0.00375578	down	no	-0.470961	3.03325e-07	down	no	-0.725791	8.36708e-14	down	no	-1.13082	7.43155e-30	down	yes	-1.07562	4.47708e-20	down	yes	gi|566154747|ref|XM_006370534.1|	4161	E:0	Populus trichocarpa hypothetical protein (POPTR_0001s44090g) mRNA, complete cds	gi|566154748|ref|XP_006370596.1|	1152	E:0	hypothetical protein POPTR_0001s44090g [Populus trichocarpa]	CIGR1_ORYSJ	634	E:0	RecName: Full=Chitin-inducible gibberellin-responsive protein 1;^Eukaryota; Viridiplantae; Streptophyta; Embryophyta; Tracheophyta; Spermatophyta; Magnoliophyta; Liliopsida; Poales; Poaceae; BOP clade; Oryzoideae; Oryzeae; Oryzinae; Oryza	CIGR1_ORYSJ	648	E:0	RecName: Full=Chitin-inducible gibberellin-responsive protein 1;^Eukaryota; Viridiplantae; Streptophyta; Embryophyta; Tracheophyta; Spermatophyta; Magnoliophyta; Liliopsida; Poales; Poaceae; BOP clade; Oryzoideae; Oryzeae; Oryzinae; Oryza	PF03514.13	GRAS	GRAS domain family	ENOG4111JS8	chitin-inducible gibberellin-responsive protein	GO:0006355|regulation of transcription, DNA-templated;GO:0006351|transcription, DNA-templated	GO:0043565|sequence-specific DNA binding;GO:0003700|transcription factor activity, sequence-specific DNA binding	GO:0005634|nucleus	.
	f2p22_2567_2590	-1.76057	5.14055e-134	down	yes	-0.956181	6.44818e-50	down	no	-1.15994	2.33579e-58	down	yes	-0.664234	4.27345e-14	down	no	-0.420394	5.20732e-09	down	no	gi|743942886|ref|XM_011017643.1|	3452	E:0	PREDICTED: Populus euphratica DELLA protein GAIP-B-like (LOC105119498), mRNA	gi|743942887|ref|XP_011015945.1|	1296	E:0	PREDICTED: DELLA protein GAIP-B-like [Populus euphratica]	GAI1_VITVI	224	E:1e-61	RecName: Full=DELLA protein GAI1;^Eukaryota; Viridiplantae; Streptophyta; Embryophyta; Tracheophyta; Spermatophyta; Magnoliophyta; eudicotyledons; Gunneridae; Pentapetalae; rosids; Vitales; Vitaceae; Vitis	GAI1_VITVI	234	E:6e-66	RecName: Full=DELLA protein GAI1;^Eukaryota; Viridiplantae; Streptophyta; Embryophyta; Tracheophyta; Spermatophyta; Magnoliophyta; eudicotyledons; Gunneridae; Pentapetalae; rosids; Vitales; Vitaceae; Vitis	PF03514.13	GRAS	GRAS domain family	ENOG410YBFY	DELLA protein	GO:0009740|gibberellic acid mediated signaling pathway;GO:0006355|regulation of transcription, DNA-templated;GO:0006351|transcription, DNA-templated	GO:0000989|transcription factor activity, transcription factor binding	GO:0005634|nucleus	K14494|DELLA; DELLA protein
	f2p60_4017_18105	-1.03342	7.1422e-17	down	yes	-0.00785382	0.936574	down	no	-0.21114	0.0472986	down	no	0.0457703	0.702814	up	no	0.00218074	0.98604	up	no	gi|743896123|ref|XM_011043033.1|	4543	E:0	PREDICTED: Populus euphratica zinc finger BED domain-containing protein RICESLEEPER 2-like (LOC105137325), transcript variant X2, mRNA	gi|743896131|ref|XP_011041340.1|	1986	E:0	PREDICTED: zinc finger BED domain-containing protein RICESLEEPER 2-like isoform X5 [Populus euphratica]	RSLE1_ORYSJ	259	E:1e-71	RecName: Full=Zinc finger BED domain-containing protein RICESLEEPER 1;^Eukaryota; Viridiplantae; Streptophyta; Embryophyta; Tracheophyta; Spermatophyta; Magnoliophyta; Liliopsida; Poales; Poaceae; BOP clade; Oryzoideae; Oryzeae; Oryzinae; Oryza	RSLE1_ORYSJ	274	E:8e-77	RecName: Full=Zinc finger BED domain-containing protein RICESLEEPER 1;^Eukaryota; Viridiplantae; Streptophyta; Embryophyta; Tracheophyta; Spermatophyta; Magnoliophyta; Liliopsida; Poales; Poaceae; BOP clade; Oryzoideae; Oryzeae; Oryzinae; Oryza	PF03514.13	GRAS	GRAS domain family	ENOG410Y37V	transposon protein	GO:0009791|post-embryonic development;GO:0006357|regulation of transcription from RNA polymerase II promoter;GO:0006351|transcription, DNA-templated	GO:0046872|metal ion binding;GO:0046983|protein dimerization activity;GO:0000977|RNA polymerase II regulatory region sequence-specific DNA binding;GO:0003700|transcription factor activity, sequence-specific DNA bindingGO:0003677|DNA binding;GO:0046983|protein dimerization activity	GO:0005634|nucleus	.
	f2p60_2497_20390	-0.448952	0.0142418	down	no	-1.14034	2.07372e-09	down	yes	-0.269664	0.13056	down	no	-0.636974	0.00184135	down	no	-0.948982	3.07203e-07	down	no	gi|743876771|ref|XM_011036984.1|	4237	E:0	PREDICTED: Populus euphratica scarecrow-like protein 30 (LOC105133142), mRNA	gi|224059472|ref|XP_002299863.1|	1436	E:0	hypothetical protein POPTR_0001s24890g [Populus trichocarpa]	SCL33_ARATH	560	E:0	RecName: Full=Scarecrow-like protein 33;^Eukaryota; Viridiplantae; Streptophyta; Embryophyta; Tracheophyta; Spermatophyta; Magnoliophyta; eudicotyledons; Gunneridae; Pentapetalae; rosids; malvids; Brassicales; Brassicaceae; Camelineae; Arabidopsis	SCL33_ARATH	561	E:0	RecName: Full=Scarecrow-like protein 33;^Eukaryota; Viridiplantae; Streptophyta; Embryophyta; Tracheophyta; Spermatophyta; Magnoliophyta; eudicotyledons; Gunneridae; Pentapetalae; rosids; malvids; Brassicales; Brassicaceae; Camelineae; Arabidopsis	PF03514.13	GRAS	GRAS domain family	ENOG410YMPH	transcription, DNA-dependent	GO:0006355|regulation of transcription, DNA-templated;GO:0006351|transcription, DNA-templated	GO:0043565|sequence-specific DNA binding;GO:0003700|transcription factor activity, sequence-specific DNA binding	GO:0005634|nucleus	.
	f2p23_2137_3798	1.00648	7.46975e-34	up	yes	0.991168	3.35297e-38	up	no	0.846592	1.45867e-23	up	no	0.241648	0.0132553	up	no	0.102032	0.286602	up	no	gi|566153245|ref|XM_006369927.1|	3740	E:0	Populus trichocarpa hypothetical protein (POPTR_0001s37270g) mRNA, complete cds	gi|566153242|ref|XP_002300358.2|	1093	E:0	hypothetical protein POPTR_0001s37270g [Populus trichocarpa]	SCL5_ARATH	641	E:0	RecName: Full=Scarecrow-like protein 5;^Eukaryota; Viridiplantae; Streptophyta; Embryophyta; Tracheophyta; Spermatophyta; Magnoliophyta; eudicotyledons; Gunneridae; Pentapetalae; rosids; malvids; Brassicales; Brassicaceae; Camelineae; Arabidopsis	SCL5_ARATH	642	E:0	RecName: Full=Scarecrow-like protein 5;^Eukaryota; Viridiplantae; Streptophyta; Embryophyta; Tracheophyta; Spermatophyta; Magnoliophyta; eudicotyledons; Gunneridae; Pentapetalae; rosids; malvids; Brassicales; Brassicaceae; Camelineae; Arabidopsis	PF03514.13	GRAS	GRAS domain family	ENOG4111JS8	chitin-inducible gibberellin-responsive protein	GO:0006355|regulation of transcription, DNA-templated;GO:0006351|transcription, DNA-templated	GO:0043565|sequence-specific DNA binding;GO:0003700|transcription factor activity, sequence-specific DNA binding	GO:0005829|cytosol;GO:0005634|nucleus	.
HB	f9p60_560_36082	1.6892	7.85298e-91	up	yes	1.40371	1.19253e-86	up	yes	2.8644	1.26037e-240	up	yes	1.55289	1.88104e-49	up	yes	0.826783	0.00194628	up	no	gi|165723349|gb|AC216677.1|	414	E:1e-112	Populus trichocarpa clone POP103-G02, complete sequence	.	.	.	.	.	.	.	.	.	.	.	.	.	.	.	.	.	.	.	.	.
	f2p60_1403_7712	1.17823	2.09835e-11	up	yes	2.4415	1.96131e-72	up	yes	0.0893988	0.665801	up	no	0.106263	0.659043	up	no	0.266939	0.174047	up	no	gi|566203467|ref|XM_002320853.2|	2429	E:0	Populus trichocarpa homeobox leucine zipper family protein (POPTR_0014s09860g) mRNA, complete cds	gi|224130632|ref|XP_002320889.1|	479	E:3e-166	homeobox leucine zipper family protein [Populus trichocarpa]	ATHB7_ARATH	229	E:4e-70	RecName: Full=Homeobox-leucine zipper protein ATHB-7;^Eukaryota; Viridiplantae; Streptophyta; Embryophyta; Tracheophyta; Spermatophyta; Magnoliophyta; eudicotyledons; Gunneridae; Pentapetalae; rosids; malvids; Brassicales; Brassicaceae; Camelineae; Arabidopsis	ATHB7_ARATH	229	E:6e-73	RecName: Full=Homeobox-leucine zipper protein ATHB-7;^Eukaryota; Viridiplantae; Streptophyta; Embryophyta; Tracheophyta; Spermatophyta; Magnoliophyta; eudicotyledons; Gunneridae; Pentapetalae; rosids; malvids; Brassicales; Brassicaceae; Camelineae; Arabidopsis	PF00046.28	Homeobox	Homeobox domain	ENOG410Z2UE	homeobox-leucine zipper protein	GO:0045893|positive regulation of transcription, DNA-templated;GO:0009737|response to abscisic acid;GO:0009414|response to water deprivation;GO:0006351|transcription, DNA-templatedGO:0006355|regulation of transcription, DNA-templated	GO:0043565|sequence-specific DNA binding;GO:0003700|transcription factor activity, sequence-specific DNA bindingGO:0003677|DNA binding;GO:0003700|transcription factor activity, sequence-specific DNA binding;GO:0043565|sequence-specific DNA binding	GO:0005634|nucleus	.
	f2p60_859_12333	1.22282	0.00710996	up	yes	2.05309	6.41492e-08	up	yes	0.826595	0.0275684	up	no	0.564602	0.0925018	up	no	0.918176	0.00489391	up	no	gi|566196521|ref|XM_002317777.2|	1480	E:0	Populus trichocarpa hypothetical protein (POPTR_0012s03080g) mRNA, complete cds	gi|566196522|ref|XP_002317813.2|	518	E:0	hypothetical protein POPTR_0012s03080g [Populus trichocarpa]	ATHB7_ARATH	149	E:1e-41	RecName: Full=Homeobox-leucine zipper protein ATHB-7;^Eukaryota; Viridiplantae; Streptophyta; Embryophyta; Tracheophyta; Spermatophyta; Magnoliophyta; eudicotyledons; Gunneridae; Pentapetalae; rosids; malvids; Brassicales; Brassicaceae; Camelineae; Arabidopsis	ATHB7_ARATH	154	E:1e-43	RecName: Full=Homeobox-leucine zipper protein ATHB-7;^Eukaryota; Viridiplantae; Streptophyta; Embryophyta; Tracheophyta; Spermatophyta; Magnoliophyta; eudicotyledons; Gunneridae; Pentapetalae; rosids; malvids; Brassicales; Brassicaceae; Camelineae; Arabidopsis	PF00046.28	Homeobox	Homeobox domain	ENOG410Z2UE	homeobox-leucine zipper protein	GO:0045893|positive regulation of transcription, DNA-templated;GO:0009737|response to abscisic acid;GO:0009414|response to water deprivation;GO:0006351|transcription, DNA-templatedGO:0006355|regulation of transcription, DNA-templated	GO:0043565|sequence-specific DNA binding;GO:0003700|transcription factor activity, sequence-specific DNA bindingGO:0003677|DNA binding;GO:0003700|transcription factor activity, sequence-specific DNA binding;GO:0043565|sequence-specific DNA binding	GO:0005634|nucleus	.
	f2p60_3166_1405	1.21115	4.73577e-74	up	yes	0.0405344	0.566155	up	no	0.0134732	0.870569	up	no	0.15469	0.0415137	up	no	0.117251	0.189285	up	no	gi|743813798|ref|XM_011021293.1|	5363	E:0	PREDICTED: Populus euphratica homeobox-leucine zipper protein ATHB-8 (LOC105122272), mRNA	gi|743813799|ref|XP_011019595.1|	1681	E:0	PREDICTED: homeobox-leucine zipper protein ATHB-8 [Populus euphratica]	ATHB8_ARATH	1412	E:0	RecName: Full=Homeobox-leucine zipper protein ATHB-8;^Eukaryota; Viridiplantae; Streptophyta; Embryophyta; Tracheophyta; Spermatophyta; Magnoliophyta; eudicotyledons; Gunneridae; Pentapetalae; rosids; malvids; Brassicales; Brassicaceae; Camelineae; Arabidopsis	ATHB8_ARATH	1449	E:0	RecName: Full=Homeobox-leucine zipper protein ATHB-8;^Eukaryota; Viridiplantae; Streptophyta; Embryophyta; Tracheophyta; Spermatophyta; Magnoliophyta; eudicotyledons; Gunneridae; Pentapetalae; rosids; malvids; Brassicales; Brassicaceae; Camelineae; Arabidopsis	PF00046.28	Homeobox	Homeobox domain	ENOG410XQ3R	homeobox-leucine zipper protein	GO:0030154|cell differentiation;GO:0010014|meristem initiation;GO:0045597|positive regulation of cell differentiation;GO:0008284|positive regulation of cell proliferation;GO:0010072|primary shoot apical meristem specification;GO:0010067|procambium histogenesis;GO:0009733|response to auxin;GO:0006351|transcription, DNA-templated;GO:0010089|xylem development	GO:0003677|DNA binding;GO:0008289|lipid binding;GO:0003700|transcription factor activity, sequence-specific DNA bindingGO:0003677|DNA binding;GO:0008289|lipid binding	GO:0005634|nucleus	K09338|HD-ZIP; homeobox-leucine zipper protein
	f2p60_1398_7750	0.997185	0.0473422	up	no	1.4241	0.00138186	up	yes	2.03601	4.0827e-09	up	yes	2.02176	7.77719e-11	up	yes	1.4533	7.35346e-06	up	yes	gi|743917158|ref|XM_011004262.1|	2290	E:0	PREDICTED: Populus euphratica homeobox protein SBH1 (LOC105109526), mRNA	gi|54042995|gb|AAV28488.1|	643	E:0	homeodomain protein ARBORKNOX1 [Populus tremula x Populus alba]	HSBH1_SOYBN	408	E:1e-137	RecName: Full=Homeobox protein SBH1;^Eukaryota; Viridiplantae; Streptophyta; Embryophyta; Tracheophyta; Spermatophyta; Magnoliophyta; eudicotyledons; Gunneridae; Pentapetalae; rosids; fabids; Fabales; Fabaceae; Papilionoideae; Phaseoleae; Glycine; Soja	HSBH1_SOYBN	446	E:6e-154	RecName: Full=Homeobox protein SBH1;^Eukaryota; Viridiplantae; Streptophyta; Embryophyta; Tracheophyta; Spermatophyta; Magnoliophyta; eudicotyledons; Gunneridae; Pentapetalae; rosids; fabids; Fabales; Fabaceae; Papilionoideae; Phaseoleae; Glycine; Soja	PF03790.12	KNOX1	KNOX1 domain	ENOG410XPMQ	homeobox	GO:0006355|regulation of transcription, DNA-templated;GO:0006351|transcription, DNA-templatedGO:0006355|regulation of transcription, DNA-templated	GO:0043565|sequence-specific DNA bindingGO:0003677|DNA binding	GO:0005634|nucleusGO:0005634|nucleus	.
	f2p19_1149_28405	-0.0739815	0.498259	down	no	-1.03277	2.56483e-17	down	yes	-0.494124	0.000140584	down	no	-0.108106	0.353465	down	no	0.128864	0.293918	up	no	gi|566194684|ref|XM_006377605.1|	1938	E:0	Populus trichocarpa PHABULOSA family protein (POPTR_0011s10070g) mRNA, complete cds	gi|60327625|gb|AAX19052.1|	414	E:3e-176	class III HD-Zip protein 3 [Populus trichocarpa]	HOX33_ORYSJ	277	E:7e-119	RecName: Full=Homeobox-leucine zipper protein HOX33;^Eukaryota; Viridiplantae; Streptophyta; Embryophyta; Tracheophyta; Spermatophyta; Magnoliophyta; Liliopsida; Poales; Poaceae; BOP clade; Oryzoideae; Oryzeae; Oryzinae; Oryza	ATB14_ARATH	306	E:4e-97	RecName: Full=Homeobox-leucine zipper protein ATHB-14;^Eukaryota; Viridiplantae; Streptophyta; Embryophyta; Tracheophyta; Spermatophyta; Magnoliophyta; eudicotyledons; Gunneridae; Pentapetalae; rosids; malvids; Brassicales; Brassicaceae; Camelineae; Arabidopsis	PF08670.10	MEKHLA	MEKHLA domain	ENOG410XQ3R	homeobox-leucine zipper protein	GO:0009955|adaxial/abaxial pattern specification;GO:0030154|cell differentiation;GO:0009855|determination of bilateral symmetry;GO:0080060|integument development;GO:0010014|meristem initiation;GO:0009944|polarity specification of adaxial/abaxial axis;GO:0010072|primary shoot apical meristem specification;GO:0006351|transcription, DNA-templated	GO:0003677|DNA binding;GO:0008289|lipid binding;GO:0003700|transcription factor activity, sequence-specific DNA binding	GO:0005634|nucleus	K09338|HD-ZIP; homeobox-leucine zipper protein;K09338|HD-ZIP; homeobox-leucine zipper protein
	f2p30_2928_1805	1.33979	1.84941e-39	up	yes	0.939783	2.79645e-22	up	no	0.822649	7.26437e-15	up	no	1.07792	NA	up	no	1.20054	2.47735e-34	up	yes	gi|566150353|ref|XM_002299737.2|	5310	E:0	Populus trichocarpa hypothetical protein (POPTR_0001s22430g) mRNA, complete cds	gi|566150354|ref|XP_002299773.2|	1348	E:0	hypothetical protein POPTR_0001s22430g [Populus trichocarpa]	BLH1_ARATH	378	E:5e-116	RecName: Full=BEL1-like homeodomain protein 1;^Eukaryota; Viridiplantae; Streptophyta; Embryophyta; Tracheophyta; Spermatophyta; Magnoliophyta; eudicotyledons; Gunneridae; Pentapetalae; rosids; malvids; Brassicales; Brassicaceae; Camelineae; Arabidopsis	BLH1_ARATH	430	E:1e-138	RecName: Full=BEL1-like homeodomain protein 1;^Eukaryota; Viridiplantae; Streptophyta; Embryophyta; Tracheophyta; Spermatophyta; Magnoliophyta; eudicotyledons; Gunneridae; Pentapetalae; rosids; malvids; Brassicales; Brassicaceae; Camelineae; Arabidopsis	PF07526.10	POX	Associated with HOX	ENOG410XPMQ	homeobox	GO:0010197|polar nucleus fusion;GO:0009737|response to abscisic acid;GO:0010201|response to continuous far red light stimulus by the high-irradiance response system;GO:0009610|response to symbiotic fungus;GO:0006351|transcription, DNA-templatedGO:0006355|regulation of transcription, DNA-templated	GO:0003677|DNA binding;GO:0046982|protein heterodimerization activity;GO:0042803|protein homodimerization activity;GO:0003700|transcription factor activity, sequence-specific DNA bindingGO:0003677|DNA binding	GO:0005737|cytoplasm;GO:0005634|nucleus	.
	f2p60_2894_1826	1.24442	7.6322e-77	up	yes	0.972135	7.2686e-60	up	no	0.781602	1.71031e-15	up	no	0.768809	6.44111e-13	up	no	0.712016	1.43269e-18	up	no	gi|566177498|ref|XM_002308287.2|	5142	E:0	Populus trichocarpa hypothetical protein (POPTR_0006s21950g) mRNA, complete cds	gi|566177493|ref|XP_006381943.1|	1092	E:0	hypothetical protein POPTR_0006s21950g [Populus trichocarpa]	BLH1_ARATH	499	E:2e-162	RecName: Full=BEL1-like homeodomain protein 1;^Eukaryota; Viridiplantae; Streptophyta; Embryophyta; Tracheophyta; Spermatophyta; Magnoliophyta; eudicotyledons; Gunneridae; Pentapetalae; rosids; malvids; Brassicales; Brassicaceae; Camelineae; Arabidopsis	BLH1_ARATH	583	E:0	RecName: Full=BEL1-like homeodomain protein 1;^Eukaryota; Viridiplantae; Streptophyta; Embryophyta; Tracheophyta; Spermatophyta; Magnoliophyta; eudicotyledons; Gunneridae; Pentapetalae; rosids; malvids; Brassicales; Brassicaceae; Camelineae; Arabidopsis	PF07526.10	POX	Associated with HOX	ENOG410XPMQ	homeobox	GO:0010197|polar nucleus fusion;GO:0009737|response to abscisic acid;GO:0010201|response to continuous far red light stimulus by the high-irradiance response system;GO:0009610|response to symbiotic fungus;GO:0006351|transcription, DNA-templatedGO:0006355|regulation of transcription, DNA-templated	GO:0003677|DNA binding;GO:0046982|protein heterodimerization activity;GO:0042803|protein homodimerization activity;GO:0003700|transcription factor activity, sequence-specific DNA bindingGO:0003677|DNA binding	GO:0005737|cytoplasm;GO:0005634|nucleus	.
	f2p60_3018_19255	1.00772	1.60729e-07	up	yes	1.29376	1.6399e-96	up	yes	1.07795	1.16124e-31	up	yes	0.707332	1.86218e-22	up	no	0.614873	3.93738e-05	up	no	gi|743898588|ref|XM_011044285.1|	5142	E:0	PREDICTED: Populus euphratica BEL1-like homeodomain protein 1 (LOC105138242), transcript variant X1, mRNA	gi|566209132|ref|XP_006373820.1|	1189	E:0	hypothetical protein POPTR_0016s07040g [Populus trichocarpa]	BLH1_ARATH	494	E:8e-160	RecName: Full=BEL1-like homeodomain protein 1;^Eukaryota; Viridiplantae; Streptophyta; Embryophyta; Tracheophyta; Spermatophyta; Magnoliophyta; eudicotyledons; Gunneridae; Pentapetalae; rosids; malvids; Brassicales; Brassicaceae; Camelineae; Arabidopsis	BLH1_ARATH	568	E:0	RecName: Full=BEL1-like homeodomain protein 1;^Eukaryota; Viridiplantae; Streptophyta; Embryophyta; Tracheophyta; Spermatophyta; Magnoliophyta; eudicotyledons; Gunneridae; Pentapetalae; rosids; malvids; Brassicales; Brassicaceae; Camelineae; Arabidopsis	PF07526.10	POX	Associated with HOX	ENOG410XPMQ	homeobox	GO:0010197|polar nucleus fusion;GO:0009737|response to abscisic acid;GO:0010201|response to continuous far red light stimulus by the high-irradiance response system;GO:0009610|response to symbiotic fungus;GO:0006351|transcription, DNA-templatedGO:0006355|regulation of transcription, DNA-templated	GO:0003677|DNA binding;GO:0046982|protein heterodimerization activity;GO:0042803|protein homodimerization activity;GO:0003700|transcription factor activity, sequence-specific DNA bindingGO:0003677|DNA binding	GO:0005737|cytoplasm;GO:0005634|nucleus	.
LBD	f5p60_1318_8262	-0.962364	5.86629e-43	down	no	-1.8274	2.01156e-142	down	yes	-1.41753	7.24183e-58	down	yes	-2.02488	NA	down	no	-2.53051	NA	down	no	gi|566171614|ref|XM_006383396.1|	2161	E:0	Populus trichocarpa hypothetical protein (POPTR_0005s15670g) mRNA, complete cds	gi|566171615|ref|XP_006383458.1|	532	E:0	hypothetical protein POPTR_0005s15670g [Populus trichocarpa]	LBD41_ARATH	292	E:1e-94	RecName: Full=LOB domain-containing protein 41;^Eukaryota; Viridiplantae; Streptophyta; Embryophyta; Tracheophyta; Spermatophyta; Magnoliophyta; eudicotyledons; Gunneridae; Pentapetalae; rosids; malvids; Brassicales; Brassicaceae; Camelineae; Arabidopsis	LBD41_ARATH	323	E:1e-108	RecName: Full=LOB domain-containing protein 41;^Eukaryota; Viridiplantae; Streptophyta; Embryophyta; Tracheophyta; Spermatophyta; Magnoliophyta; eudicotyledons; Gunneridae; Pentapetalae; rosids; malvids; Brassicales; Brassicaceae; Camelineae; Arabidopsis	PF03195.13	LOB	Lateral organ boundaries (LOB) domain	ENOG410YBK4	lob domain-containing protein	GO:0006355|regulation of transcription, DNA-templated	.	.	.
MADS	f2p22_763_32729	-1.22062	5.98132e-11	down	yes	-1.23639	3.36684e-12	down	yes	-0.320332	0.0524919	down	no	-0.0581847	0.741237	down	no	0.0312979	0.847069	up	no	gi|743818988|ref|XM_011022470.1|	1092	E:0	PREDICTED: Populus euphratica MADS-box transcription factor 14-like (LOC105123027), transcript variant X2, mRNA	gi|743818989|ref|XP_011020772.1|	328	E:3e-111	PREDICTED: MADS-box transcription factor 14-like isoform X2 [Populus euphratica]	MAD18_ORYSJ	153	E:3e-43	RecName: Full=MADS-box transcription factor 18;^Eukaryota; Viridiplantae; Streptophyta; Embryophyta; Tracheophyta; Spermatophyta; Magnoliophyta; Liliopsida; Poales; Poaceae; BOP clade; Oryzoideae; Oryzeae; Oryzinae; Oryza	MAD18_ORYSJ	153	E:3e-44	RecName: Full=MADS-box transcription factor 18;^Eukaryota; Viridiplantae; Streptophyta; Embryophyta; Tracheophyta; Spermatophyta; Magnoliophyta; Liliopsida; Poales; Poaceae; BOP clade; Oryzoideae; Oryzeae; Oryzinae; Oryza	PF00319.17	SRF-TF	SRF-type transcription factor (DNA-binding and dimerisation domain)	COG5068	Transcription factor	GO:0030154|cell differentiation;GO:0009908|flower development;GO:0045944|positive regulation of transcription from RNA polymerase II promoter;GO:0006351|transcription, DNA-templatedGO:0006355|regulation of transcription, DNA-templated	GO:0046983|protein dimerization activity;GO:0000977|RNA polymerase II regulatory region sequence-specific DNA binding;GO:0003700|transcription factor activity, sequence-specific DNA bindingGO:0003677|DNA binding;GO:0046983|protein dimerization activity;GO:0003700|transcription factor activity, sequence-specific DNA binding	GO:0005634|nucleusGO:0005634|nucleus	.
	f2p60_940_30685	-1.55321	6.03854e-12	down	yes	-1.16798	8.2538e-09	down	yes	-0.264017	0.140812	down	no	-0.196877	0.254667	down	no	0.101576	0.542034	up	no	gi|743818992|ref|XM_011022471.1|	1349	E:0	PREDICTED: Populus euphratica MADS-box transcription factor 14-like (LOC105123027), transcript variant X3, mRNA	gi|743819009|ref|XP_011020774.1|	329	E:7e-111	PREDICTED: MADS-box transcription factor 14-like isoform X4 [Populus euphratica]	MAD18_ORYSJ	154	E:7e-43	RecName: Full=MADS-box transcription factor 18;^Eukaryota; Viridiplantae; Streptophyta; Embryophyta; Tracheophyta; Spermatophyta; Magnoliophyta; Liliopsida; Poales; Poaceae; BOP clade; Oryzoideae; Oryzeae; Oryzinae; Oryza	MAD18_ORYSJ	154	E:9e-45	RecName: Full=MADS-box transcription factor 18;^Eukaryota; Viridiplantae; Streptophyta; Embryophyta; Tracheophyta; Spermatophyta; Magnoliophyta; Liliopsida; Poales; Poaceae; BOP clade; Oryzoideae; Oryzeae; Oryzinae; Oryza	PF00319.17	SRF-TF	SRF-type transcription factor (DNA-binding and dimerisation domain)	COG5068	Transcription factor	GO:0030154|cell differentiation;GO:0009908|flower development;GO:0045944|positive regulation of transcription from RNA polymerase II promoter;GO:0006351|transcription, DNA-templatedGO:0006355|regulation of transcription, DNA-templated	GO:0046983|protein dimerization activity;GO:0000977|RNA polymerase II regulatory region sequence-specific DNA binding;GO:0003700|transcription factor activity, sequence-specific DNA bindingGO:0003677|DNA binding;GO:0046983|protein dimerization activity;GO:0003700|transcription factor activity, sequence-specific DNA binding	GO:0005634|nucleusGO:0005634|nucleus	.
	f3p60_1097_29028	-1.30587	2.82288e-66	down	yes	-1.26024	1.38159e-45	down	yes	-0.410233	1.0885e-08	down	no	-0.110202	0.115695	down	no	-0.0424978	0.600379	down	no	gi|743818984|ref|XM_011022469.1|	1624	E:0	PREDICTED: Populus euphratica MADS-box transcription factor 14-like (LOC105123027), transcript variant X1, mRNA	gi|743818985|ref|XP_011020771.1|	384	E:3e-131	PREDICTED: MADS-box transcription factor 14-like isoform X1 [Populus euphratica]	MAD18_ORYSJ	149	E:1e-40	RecName: Full=MADS-box transcription factor 18;^Eukaryota; Viridiplantae; Streptophyta; Embryophyta; Tracheophyta; Spermatophyta; Magnoliophyta; Liliopsida; Poales; Poaceae; BOP clade; Oryzoideae; Oryzeae; Oryzinae; Oryza	MAD18_ORYSJ	149	E:2e-42	RecName: Full=MADS-box transcription factor 18;^Eukaryota; Viridiplantae; Streptophyta; Embryophyta; Tracheophyta; Spermatophyta; Magnoliophyta; Liliopsida; Poales; Poaceae; BOP clade; Oryzoideae; Oryzeae; Oryzinae; Oryza	PF00319.17	SRF-TF	SRF-type transcription factor (DNA-binding and dimerisation domain)	COG5068	Transcription factor	GO:0030154|cell differentiation;GO:0009908|flower development;GO:0045944|positive regulation of transcription from RNA polymerase II promoter;GO:0006351|transcription, DNA-templatedGO:0006355|regulation of transcription, DNA-templated	GO:0046983|protein dimerization activity;GO:0000977|RNA polymerase II regulatory region sequence-specific DNA binding;GO:0003700|transcription factor activity, sequence-specific DNA bindingGO:0003677|DNA binding;GO:0046983|protein dimerization activity;GO:0003700|transcription factor activity, sequence-specific DNA binding	GO:0005634|nucleusGO:0005634|nucleus	.
MYB	f4p60_3026_19232	-2.36999	8.47048e-118	down	yes	-1.95443	4.88346e-98	down	yes	0.653309	4.95548e-11	up	no	1.01045	1.58841e-42	up	yes	1.01414	2.90768e-10	up	yes	gi|566158674|ref|XM_006386602.1|	5422	E:0	Populus trichocarpa hypothetical protein (POPTR_0002s18190g) mRNA, complete cds	gi|566158673|ref|XP_006386663.1|	1342	E:0	hypothetical protein POPTR_0002s18190g [Populus trichocarpa]	LHY_ARATH	368	E:2e-112	RecName: Full=Protein LHY {ECO:0000303|PubMed:9657154};^Eukaryota; Viridiplantae; Streptophyta; Embryophyta; Tracheophyta; Spermatophyta; Magnoliophyta; eudicotyledons; Gunneridae; Pentapetalae; rosids; malvids; Brassicales; Brassicaceae; Camelineae; Arabidopsis	LHY_ARATH	434	E:3e-140	RecName: Full=Protein LHY {ECO:0000303|PubMed:9657154};^Eukaryota; Viridiplantae; Streptophyta; Embryophyta; Tracheophyta; Spermatophyta; Magnoliophyta; eudicotyledons; Gunneridae; Pentapetalae; rosids; malvids; Brassicales; Brassicaceae; Camelineae; Arabidopsis	PF00249.30	Myb_DNA-binding	Myb-like DNA-binding domain	ENOG4111HV1	Transcription factor	GO:0007623|circadian rhythm;GO:0048574|long-day photoperiodism, flowering;GO:0042754|negative regulation of circadian rhythm;GO:0043433|negative regulation of sequence-specific DNA binding transcription factor activity;GO:0042752|regulation of circadian rhythm;GO:0006355|regulation of transcription, DNA-templated;GO:0009737|response to abscisic acid;GO:0009733|response to auxin;GO:0046686|respons…	GO:0003700|transcription factor activity, sequence-specific DNA binding;GO:0044212|transcription regulatory region DNA binding	GO:0005634|nucleus	K12133|LHY; MYB-related transcription factor LHY
	f3p60_1169_28079	1.33509	1.54375e-11	up	yes	1.19915	4.1889e-10	up	yes	1.08796	1.02041e-08	up	yes	1.21936	1.78406e-09	up	yes	0.88408	3.99462e-05	up	no	gi|566167159|ref|XM_002306144.2|	2025	E:0	Populus trichocarpa myb family transcription factor family protein (POPTR_0004s18020g) mRNA, complete cds	gi|224080616|ref|XP_002306180.1|	439	E:1e-151	myb family transcription factor family protein [Populus trichocarpa]	MYB08_ANTMA	330	E:2e-110	RecName: Full=Myb-related protein 308;^Eukaryota; Viridiplantae; Streptophyta; Embryophyta; Tracheophyta; Spermatophyta; Magnoliophyta; eudicotyledons; Gunneridae; Pentapetalae; asterids; lamiids; Lamiales; Plantaginaceae; Antirrhineae; Antirrhinum	MYB08_ANTMA	364	E:8e-126	RecName: Full=Myb-related protein 308;^Eukaryota; Viridiplantae; Streptophyta; Embryophyta; Tracheophyta; Spermatophyta; Magnoliophyta; eudicotyledons; Gunneridae; Pentapetalae; asterids; lamiids; Lamiales; Plantaginaceae; Antirrhineae; Antirrhinum	PF00249.30	Myb_DNA-binding	Myb-like DNA-binding domain	.	.	GO:0006355|regulation of transcription, DNA-templated;GO:0006351|transcription, DNA-templated	GO:0003677|DNA binding	GO:0005634|nucleus	.
	f2p60_1165_28240	-1.07716	2.68915e-37	down	yes	-1.25177	1.07785e-12	down	yes	-0.289552	0.00142512	down	no	-0.32135	0.0077655	down	no	-0.0769068	0.510983	down	no	gi|566186065|ref|XM_002313416.2|	1544	E:0	Populus trichocarpa myb family transcription factor family protein (POPTR_0009s03240g) mRNA, complete cds	gi|566186066|ref|XP_002313452.2|	354	E:1e-118	myb family transcription factor family protein [Populus trichocarpa]	MYB48_ARATH	211	E:5e-64	RecName: Full=Transcription factor MYB48;^Eukaryota; Viridiplantae; Streptophyta; Embryophyta; Tracheophyta; Spermatophyta; Magnoliophyta; eudicotyledons; Gunneridae; Pentapetalae; rosids; malvids; Brassicales; Brassicaceae; Camelineae; Arabidopsis	MYB48_ARATH	169	E:2e-50	RecName: Full=Transcription factor MYB48;^Eukaryota; Viridiplantae; Streptophyta; Embryophyta; Tracheophyta; Spermatophyta; Magnoliophyta; eudicotyledons; Gunneridae; Pentapetalae; rosids; malvids; Brassicales; Brassicaceae; Camelineae; Arabidopsis	PF00249.30	Myb_DNA-binding	Myb-like DNA-binding domain	COG5147	Myblike DNAbinding domain containing protein	GO:0030154|cell differentiation;GO:0006357|regulation of transcription from RNA polymerase II promoter;GO:0006355|regulation of transcription, DNA-templated;GO:0009751|response to salicylic acid;GO:0006351|transcription, DNA-templated	GO:0000981|RNA polymerase II transcription factor activity, sequence-specific DNA binding;GO:0043565|sequence-specific DNA binding;GO:0001135|transcription factor activity, RNA polymerase II transcription factor recruiting;GO:0003700|transcription factor activity, sequence-specific DNA binding;GO:0044212|transcription regulatory region DNA binding	GO:0005634|nucleus	.
	f2p60_582_15223	-0.490939	2.55939e-05	down	no	0.89277	6.68968e-23	up	no	0.889063	1.0417e-16	up	no	0.856263	2.7813e-16	up	no	1.02735	4.8411e-23	up	yes	gi|743885736|ref|XM_011039339.1|	885	E:0	PREDICTED: Populus euphratica MYB-like transcription factor ETC1 (LOC105134794), mRNA	gi|743885737|ref|XP_011037641.1|	156	E:4e-46	PREDICTED: MYB-like transcription factor ETC1 [Populus euphratica]	CPC_ARATH	70.9	E:1e-14	RecName: Full=Transcription factor CPC;^Eukaryota; Viridiplantae; Streptophyta; Embryophyta; Tracheophyta; Spermatophyta; Magnoliophyta; eudicotyledons; Gunneridae; Pentapetalae; rosids; malvids; Brassicales; Brassicaceae; Camelineae; Arabidopsis	.	.	.	.	.	.	.	ENOG411043T	Myb-like DNA-binding domain	GO:0009913|epidermal cell differentiation;GO:0007275|multicellular organism development;GO:0010063|positive regulation of trichoblast fate specification;GO:0006357|regulation of transcription from RNA polymerase II promoter;GO:0009753|response to jasmonic acid;GO:0009751|response to salicylic acid;GO:0006351|transcription, DNA-templated	GO:0000981|RNA polymerase II transcription factor activity, sequence-specific DNA binding;GO:0043565|sequence-specific DNA binding;GO:0001135|transcription factor activity, RNA polymerase II transcription factor recruiting;GO:0003700|transcription factor activity, sequence-specific DNA binding;GO:0044212|transcription regulatory region DNA binding	GO:0005634|nucleus	K09422|MYBP; myb proto-oncogene protein, plant
	f2p60_925_30878	-2.77232	2.91569e-72	down	yes	-2.27801	4.40359e-62	down	yes	0.485292	4.37679e-05	up	no	0.742289	2.9372e-13	up	no	1.00575	NA	up	no	gi|566203542|ref|XM_002320202.2|	1543	E:0	Populus trichocarpa hypothetical protein (POPTR_0014s10260g) mRNA, complete cds	gi|566203543|ref|XP_002320238.2|	333	E:1e-105	hypothetical protein POPTR_0014s10260g [Populus trichocarpa]	LHY_ARATH	147	E:2e-38	RecName: Full=Protein LHY {ECO:0000303|PubMed:9657154};^Eukaryota; Viridiplantae; Streptophyta; Embryophyta; Tracheophyta; Spermatophyta; Magnoliophyta; eudicotyledons; Gunneridae; Pentapetalae; rosids; malvids; Brassicales; Brassicaceae; Camelineae; Arabidopsis	LHY_ARATH	156	E:5e-43	RecName: Full=Protein LHY {ECO:0000303|PubMed:9657154};^Eukaryota; Viridiplantae; Streptophyta; Embryophyta; Tracheophyta; Spermatophyta; Magnoliophyta; eudicotyledons; Gunneridae; Pentapetalae; rosids; malvids; Brassicales; Brassicaceae; Camelineae; Arabidopsis	.	.	.	ENOG4111HV1	Transcription factor	GO:0007623|circadian rhythm;GO:0048574|long-day photoperiodism, flowering;GO:0042754|negative regulation of circadian rhythm;GO:0043433|negative regulation of sequence-specific DNA binding transcription factor activity;GO:0042752|regulation of circadian rhythm;GO:0006355|regulation of transcription, DNA-templated;GO:0009737|response to abscisic acid;GO:0009733|response to auxin;GO:0046686|respons…	GO:0003700|transcription factor activity, sequence-specific DNA binding;GO:0044212|transcription regulatory region DNA binding	GO:0005634|nucleus	K12133|LHY; MYB-related transcription factor LHY
	f2p60_1066_29362	2.72059	3.09965e-07	up	yes	1.19753	0.025665	up	no	0.408889	0.226152	up	no	0.222059	0.376484	up	no	-0.0894254	0.592626	down	no	gi|743839591|ref|XM_011027681.1|	339	E:2e-89	PREDICTED: Populus euphratica myb-related protein Myb4-like (LOC105126725), mRNA	gi|743839592|ref|XP_011025983.1|	102	E:2e-22	PREDICTED: myb-related protein Myb4-like [Populus euphratica]	MYB4_ORYSJ	96.7	E:1e-21	RecName: Full=Transcription factor MYB4 {ECO:0000305};^Eukaryota; Viridiplantae; Streptophyta; Embryophyta; Tracheophyta; Spermatophyta; Magnoliophyta; Liliopsida; Poales; Poaceae; BOP clade; Oryzoideae; Oryzeae; Oryzinae; Oryza	.	.	.	.	.	.	.	COG5147	Myblike DNAbinding domain containing protein	GO:0030154|cell differentiation;GO:0006357|regulation of transcription from RNA polymerase II promoter;GO:0006351|transcription, DNA-templated	GO:0000981|RNA polymerase II transcription factor activity, sequence-specific DNA binding;GO:0043565|sequence-specific DNA binding;GO:0001135|transcription factor activity, RNA polymerase II transcription factor recruiting;GO:0044212|transcription regulatory region DNA binding	GO:0005634|nucleus	K09422|MYBP; myb proto-oncogene protein, plant
	f3p60_1448_25567	-1.04929	3.79111e-37	down	yes	-1.23349	8.91676e-43	down	yes	-0.369682	2.2255e-05	down	no	-0.24263	0.0312727	down	no	-0.0514665	0.568898	down	no	gi|566186065|ref|XM_002313416.2|	1284	E:0	Populus trichocarpa myb family transcription factor family protein (POPTR_0009s03240g) mRNA, complete cds	gi|566186066|ref|XP_002313452.2|	262	E:3e-81	myb family transcription factor family protein [Populus trichocarpa]	MYB48_ARATH	122	E:3e-30	RecName: Full=Transcription factor MYB48;^Eukaryota; Viridiplantae; Streptophyta; Embryophyta; Tracheophyta; Spermatophyta; Magnoliophyta; eudicotyledons; Gunneridae; Pentapetalae; rosids; malvids; Brassicales; Brassicaceae; Camelineae; Arabidopsis	.	.	.	.	.	.	.	COG5147	Myblike DNAbinding domain containing protein	GO:0030154|cell differentiation;GO:0006357|regulation of transcription from RNA polymerase II promoter;GO:0006355|regulation of transcription, DNA-templated;GO:0009751|response to salicylic acid;GO:0006351|transcription, DNA-templated	GO:0000981|RNA polymerase II transcription factor activity, sequence-specific DNA binding;GO:0043565|sequence-specific DNA binding;GO:0001135|transcription factor activity, RNA polymerase II transcription factor recruiting;GO:0003700|transcription factor activity, sequence-specific DNA binding;GO:0044212|transcription regulatory region DNA binding	GO:0005634|nucleus	.
	f3p60_1224_9210	4.2197	4.73659e-128	up	yes	3.88851	1.2044e-110	up	yes	3.35758	2.7252e-77	up	yes	1.79468	3.18413e-13	up	yes	1.29453	1.73485e-08	up	yes	gi|566170461|ref|XM_002307154.2|	2134	E:0	Populus trichocarpa hypothetical protein (POPTR_0005s09930g) mRNA, complete cds	gi|224083966|ref|XP_002307190.1|	346	E:0	hypothetical protein POPTR_0005s09930g [Populus trichocarpa]	MYB58_ARATH	228	E:8e-70	RecName: Full=Transcription factor MYB58 {ECO:0000303|PubMed:11597504};^Eukaryota; Viridiplantae; Streptophyta; Embryophyta; Tracheophyta; Spermatophyta; Magnoliophyta; eudicotyledons; Gunneridae; Pentapetalae; rosids; malvids; Brassicales; Brassicaceae; Camelineae; Arabidopsis	MYB58_ARATH	237	E:4e-76	RecName: Full=Transcription factor MYB58 {ECO:0000303|PubMed:11597504};^Eukaryota; Viridiplantae; Streptophyta; Embryophyta; Tracheophyta; Spermatophyta; Magnoliophyta; eudicotyledons; Gunneridae; Pentapetalae; rosids; malvids; Brassicales; Brassicaceae; Camelineae; Arabidopsis	PF00249.30	Myb_DNA-binding	Myb-like DNA-binding domain	COG5147	Myblike DNAbinding domain containing protein	GO:0030154|cell differentiation;GO:0009809|lignin biosynthetic process;GO:0045893|positive regulation of transcription, DNA-templated;GO:2000652|regulation of secondary cell wall biogenesis;GO:0006357|regulation of transcription from RNA polymerase II promoter;GO:0009416|response to light stimulus;GO:0006351|transcription, DNA-templated	GO:0000981|RNA polymerase II transcription factor activity, sequence-specific DNA binding;GO:0043565|sequence-specific DNA binding;GO:0001135|transcription factor activity, RNA polymerase II transcription factor recruiting;GO:0003700|transcription factor activity, sequence-specific DNA binding;GO:0044212|transcription regulatory region DNA binding	GO:0005634|nucleus	.
	f2p60_1329_26646	-0.0342231	0.907343	down	no	-1.13681	0.00116524	down	yes	-0.699616	0.0167183	down	no	-0.991635	0.000753163	down	no	-1.26161	1.36937e-05	down	yes	gi|743905620|ref|XM_011047913.1|	2217	E:0	PREDICTED: Populus euphratica protein ODORANT1-like (LOC105140877), mRNA	gi|224133650|ref|XP_002321627.1|	753	E:0	hypothetical protein POPTR_0015s09430g [Populus trichocarpa]	MYB86_ARATH	249	E:1e-76	RecName: Full=Transcription factor MYB86;^Eukaryota; Viridiplantae; Streptophyta; Embryophyta; Tracheophyta; Spermatophyta; Magnoliophyta; eudicotyledons; Gunneridae; Pentapetalae; rosids; malvids; Brassicales; Brassicaceae; Camelineae; Arabidopsis	MYB86_ARATH	249	E:8e-78	RecName: Full=Transcription factor MYB86;^Eukaryota; Viridiplantae; Streptophyta; Embryophyta; Tracheophyta; Spermatophyta; Magnoliophyta; eudicotyledons; Gunneridae; Pentapetalae; rosids; malvids; Brassicales; Brassicaceae; Camelineae; Arabidopsis	PF00249.30	Myb_DNA-binding	Myb-like DNA-binding domain	COG5147	Myblike DNAbinding domain containing protein	GO:0030154|cell differentiation;GO:0006357|regulation of transcription from RNA polymerase II promoter;GO:0006351|transcription, DNA-templated	GO:0000981|RNA polymerase II transcription factor activity, sequence-specific DNA binding;GO:0043565|sequence-specific DNA binding;GO:0001135|transcription factor activity, RNA polymerase II transcription factor recruiting;GO:0044212|transcription regulatory region DNA binding	GO:0005634|nucleus	K09422|MYBP; myb proto-oncogene protein, plant
	f4p60_1284_27065	1.15524	3.93422e-45	up	yes	1.11689	1.16856e-45	up	yes	1.28823	1.69858e-51	up	yes	0.897025	7.97136e-18	up	no	0.607291	6.98646e-07	up	no	gi|566198496|ref|XM_002318842.2|	2141	E:0	Populus trichocarpa hypothetical protein (POPTR_0012s14540g) mRNA, complete cds	gi|743856630|ref|XP_011029963.1|	503	E:4e-176	PREDICTED: protein ODORANT1-like [Populus euphratica]	ODO1_PETHY	270	E:8e-86	RecName: Full=Protein ODORANT1;^Eukaryota; Viridiplantae; Streptophyta; Embryophyta; Tracheophyta; Spermatophyta; Magnoliophyta; eudicotyledons; Gunneridae; Pentapetalae; asterids; lamiids; Solanales; Solanaceae; Petunioideae; Petunia	ODO1_PETHY	278	E:4e-91	RecName: Full=Protein ODORANT1;^Eukaryota; Viridiplantae; Streptophyta; Embryophyta; Tracheophyta; Spermatophyta; Magnoliophyta; eudicotyledons; Gunneridae; Pentapetalae; asterids; lamiids; Solanales; Solanaceae; Petunioideae; Petunia	PF00249.30	Myb_DNA-binding	Myb-like DNA-binding domain	.	.	GO:0006355|regulation of transcription, DNA-templated;GO:0006351|transcription, DNA-templated	GO:0003677|DNA binding	GO:0005634|nucleus	.
	f2p60_1263_8777	-1.48374	1.36832e-77	down	yes	-0.797214	2.60293e-29	down	no	-0.384684	2.42319e-06	down	no	-0.120584	0.275521	down	no	-0.018819	0.859702	down	no	gi|566152160|ref|XM_006369739.1|	2237	E:0	Populus trichocarpa hypothetical protein (POPTR_0001s32200g) mRNA, complete cds	gi|566152161|ref|XP_006369801.1|	579	E:0	hypothetical protein POPTR_0001s32200g [Populus trichocarpa]	PHL3_ARATH	343	E:2e-114	RecName: Full=Protein PHR1-LIKE 3 {ECO:0000303|PubMed:26586833};^Eukaryota; Viridiplantae; Streptophyta; Embryophyta; Tracheophyta; Spermatophyta; Magnoliophyta; eudicotyledons; Gunneridae; Pentapetalae; rosids; malvids; Brassicales; Brassicaceae; Camelineae; Arabidopsis	PHL3_ARATH	392	E:2e-134	RecName: Full=Protein PHR1-LIKE 3 {ECO:0000303|PubMed:26586833};^Eukaryota; Viridiplantae; Streptophyta; Embryophyta; Tracheophyta; Spermatophyta; Magnoliophyta; eudicotyledons; Gunneridae; Pentapetalae; rosids; malvids; Brassicales; Brassicaceae; Camelineae; Arabidopsis	PF00249.30	Myb_DNA-binding	Myb-like DNA-binding domain	ENOG410YGB1	Myb-like DNA-binding domain	GO:0009567|double fertilization forming a zygote and endosperm;GO:0010628|positive regulation of gene expression;GO:0006351|transcription, DNA-templated	GO:0043565|sequence-specific DNA binding;GO:0003700|transcription factor activity, sequence-specific DNA binding	GO:0005634|nucleus	.
	f2p60_1457_7420	-0.484855	5.52066e-09	down	no	-0.989287	2.78067e-29	down	no	-1.02439	3.03528e-23	down	yes	-0.949245	7.83592e-15	down	no	-1.17875	3.10483e-11	down	yes	gi|566255871|ref|XM_006387901.1|	2193	E:0	Populus trichocarpa hypothetical protein (POPTR_0453s00230g) mRNA, complete cds	gi|566255872|ref|XP_006387963.1|	589	E:0	hypothetical protein POPTR_0453s00230g [Populus trichocarpa]	PHL5_ARATH	166	E:1e-44	RecName: Full=Myb family transcription factor PHL5 {ECO:0000305};^Eukaryota; Viridiplantae; Streptophyta; Embryophyta; Tracheophyta; Spermatophyta; Magnoliophyta; eudicotyledons; Gunneridae; Pentapetalae; rosids; malvids; Brassicales; Brassicaceae; Camelineae; Arabidopsis	PHL5_ARATH	171	E:3e-48	RecName: Full=Myb family transcription factor PHL5 {ECO:0000305};^Eukaryota; Viridiplantae; Streptophyta; Embryophyta; Tracheophyta; Spermatophyta; Magnoliophyta; eudicotyledons; Gunneridae; Pentapetalae; rosids; malvids; Brassicales; Brassicaceae; Camelineae; Arabidopsis	PF00249.30	Myb_DNA-binding	Myb-like DNA-binding domain	ENOG410YGDG	Myb-like DNA-binding domain	GO:0006355|regulation of transcription, DNA-templated;GO:0006351|transcription, DNA-templated	GO:0003677|DNA binding;GO:0003700|transcription factor activity, sequence-specific DNA binding	GO:0005634|nucleus	.
NAC	f7p60_1432_25632	1.62607	2.01592e-132	up	yes	0.143993	0.0503673	up	no	-0.0329898	0.706586	down	no	-0.406962	1.28985e-06	down	no	-0.552924	3.43388e-10	down	no	gi|566169947|ref|XM_002306244.2|	2438	E:0	Populus trichocarpa hypothetical protein (POPTR_0005s07060g) mRNA, complete cds	gi|224081060|ref|XP_002306280.1|	611	E:0	hypothetical protein POPTR_0005s07060g [Populus trichocarpa]	NAC2_ARATH	357	E:8e-119	RecName: Full=NAC domain-containing protein 2;^Eukaryota; Viridiplantae; Streptophyta; Embryophyta; Tracheophyta; Spermatophyta; Magnoliophyta; eudicotyledons; Gunneridae; Pentapetalae; rosids; malvids; Brassicales; Brassicaceae; Camelineae; Arabidopsis	NAC2_ARATH	364	E:3e-124	RecName: Full=NAC domain-containing protein 2;^Eukaryota; Viridiplantae; Streptophyta; Embryophyta; Tracheophyta; Spermatophyta; Magnoliophyta; eudicotyledons; Gunneridae; Pentapetalae; rosids; malvids; Brassicales; Brassicaceae; Camelineae; Arabidopsis	PF02365.14	NAM	No apical meristem (NAM) protein	ENOG410YE96	Nac domain-containing protein	GO:0009788|negative regulation of abscisic acid-activated signaling pathway;GO:0009611|response to wounding;GO:0006351|transcription, DNA-templatedGO:0006355|regulation of transcription, DNA-templated	GO:0003677|DNA binding;GO:0003700|transcription factor activity, sequence-specific DNA bindingGO:0003677|DNA binding	GO:0005634|nucleus	.
	f2p60_1906_22508	-1.29314	1.15534e-13	down	yes	-0.712787	4.75923e-06	down	no	-0.69491	1.10876e-05	down	no	-0.258961	0.099299	down	no	-0.423729	0.0083199	down	no	gi|566202056|ref|XM_006374845.1|	2475	E:0	Populus trichocarpa hypothetical protein (POPTR_0014s02580g) mRNA, complete cds	gi|566202057|ref|XP_006374907.1|	534	E:0	hypothetical protein POPTR_0014s02580g [Populus trichocarpa]	NAC29_ARATH	88.6	E:6e-18	RecName: Full=NAC transcription factor 29;^Eukaryota; Viridiplantae; Streptophyta; Embryophyta; Tracheophyta; Spermatophyta; Magnoliophyta; eudicotyledons; Gunneridae; Pentapetalae; rosids; malvids; Brassicales; Brassicaceae; Camelineae; Arabidopsis	NAC72_ARATH	100	E:4e-23	RecName: Full=NAC domain-containing protein 72;^Eukaryota; Viridiplantae; Streptophyta; Embryophyta; Tracheophyta; Spermatophyta; Magnoliophyta; eudicotyledons; Gunneridae; Pentapetalae; rosids; malvids; Brassicales; Brassicaceae; Camelineae; Arabidopsis	PF02365.14	NAM	No apical meristem (NAM) protein	.	.	GO:0006355|regulation of transcription, DNA-templated;GO:0006351|transcription, DNA-templatedGO:0006355|regulation of transcription, DNA-templated	GO:0003677|DNA bindingGO:0003677|DNA binding	GO:0005634|nucleus	.
	f3p60_1826_22964	-1.17239	1.89665e-26	down	yes	-0.820945	1.32831e-16	down	no	-0.664327	3.40894e-10	down	no	-0.327788	0.000598704	down	no	-0.175941	0.0887828	down	no	gi|566202056|ref|XM_006374845.1|	3177	E:0	Populus trichocarpa hypothetical protein (POPTR_0014s02580g) mRNA, complete cds	gi|566202057|ref|XP_006374907.1|	534	E:0	hypothetical protein POPTR_0014s02580g [Populus trichocarpa]	NAC29_ARATH	88.6	E:6e-18	RecName: Full=NAC transcription factor 29;^Eukaryota; Viridiplantae; Streptophyta; Embryophyta; Tracheophyta; Spermatophyta; Magnoliophyta; eudicotyledons; Gunneridae; Pentapetalae; rosids; malvids; Brassicales; Brassicaceae; Camelineae; Arabidopsis	NAC72_ARATH	100	E:4e-23	RecName: Full=NAC domain-containing protein 72;^Eukaryota; Viridiplantae; Streptophyta; Embryophyta; Tracheophyta; Spermatophyta; Magnoliophyta; eudicotyledons; Gunneridae; Pentapetalae; rosids; malvids; Brassicales; Brassicaceae; Camelineae; Arabidopsis	PF02365.14	NAM	No apical meristem (NAM) protein	.	.	GO:0006355|regulation of transcription, DNA-templated;GO:0006351|transcription, DNA-templatedGO:0006355|regulation of transcription, DNA-templated	GO:0003677|DNA bindingGO:0003677|DNA binding	GO:0005634|nucleus	.
	f2p13_719_13897	1.02213	2.09003e-35	up	yes	0.696264	4.24891e-19	up	no	0.458384	1.75771e-06	up	no	0.119697	0.194303	up	no	0.16907	0.0720025	up	no	gi|566205992|ref|XM_006374198.1|	1242	E:0	Populus trichocarpa nascent polypeptide-associated complex domain-containing family protein (POPTR_0015s05470g) mRNA, complete cds	gi|429326398|gb|AFZ78539.1|	297	E:4e-99	basic transcription factor 3 [Populus tomentosa]	BTF3L_ARATH	235	E:2e-76	RecName: Full=Nascent polypeptide-associated complex subunit beta {ECO:0000255|RuleBase:RU361272};^Eukaryota; Viridiplantae; Streptophyta; Embryophyta; Tracheophyta; Spermatophyta; Magnoliophyta; eudicotyledons; Gunneridae; Pentapetalae; rosids; malvids; Brassicales; Brassicaceae; Camelineae; Arabidopsis	BTF3_ARATH	256	E:8e-86	RecName: Full=Basic transcription factor 3 {ECO:0000303|PubMed:2320128};^Eukaryota; Viridiplantae; Streptophyta; Embryophyta; Tracheophyta; Spermatophyta; Magnoliophyta; eudicotyledons; Gunneridae; Pentapetalae; rosids; malvids; Brassicales; Brassicaceae; Camelineae; Arabidopsis	PF01849.17	NAC	NAC domain	ENOG4111JBG	Component of the nascent polypeptide-associated complex (NAC), a dynamic component of the ribosomal exit tunnel, protecting the emerging polypeptides from interaction with other cytoplasmic proteins to ensure appropriate nascent protein targeting (By similarity). The NAC complex also promotes mitochondrial protein import by enhancing productive ribosome interactions with the outer mitochondrial m…	GO:0006355|regulation of transcription, DNA-templated;GO:0009651|response to salt stress;GO:0006351|transcription, DNA-templated	.	.	K01527|EGD1, BTF3; nascent polypeptide-associated complex subunit beta
	f2p60_1228_9087	-2.66561	2.23549e-12	down	yes	-1.74385	5.37045e-08	down	yes	-1.98684	3.68774e-10	down	yes	-1.39565	1.69078e-06	down	yes	-0.972182	0.00138235	down	no	gi|566187960|ref|XM_002313644.2|	2124	E:0	Populus trichocarpa no apical meristem family protein (POPTR_0009s14370g) mRNA, complete cds	gi|224105083|ref|XP_002313680.1|	557	E:0	no apical meristem family protein [Populus trichocarpa]	NAC35_ARATH	193	E:5e-55	RecName: Full=NAC domain-containing protein 35 {ECO:0000303|PubMed:15029955};^Eukaryota; Viridiplantae; Streptophyta; Embryophyta; Tracheophyta; Spermatophyta; Magnoliophyta; eudicotyledons; Gunneridae; Pentapetalae; rosids; malvids; Brassicales; Brassicaceae; Camelineae; Arabidopsis	NAC35_ARATH	194	E:9e-57	RecName: Full=NAC domain-containing protein 35 {ECO:0000303|PubMed:15029955};^Eukaryota; Viridiplantae; Streptophyta; Embryophyta; Tracheophyta; Spermatophyta; Magnoliophyta; eudicotyledons; Gunneridae; Pentapetalae; rosids; malvids; Brassicales; Brassicaceae; Camelineae; Arabidopsis	PF02365.14	NAM	No apical meristem (NAM) protein	ENOG410YIMX	nac domain	GO:0009908|flower development;GO:0006351|transcription, DNA-templatedGO:0006355|regulation of transcription, DNA-templated	GO:0003677|DNA binding;GO:0003700|transcription factor activity, sequence-specific DNA bindingGO:0003677|DNA binding	GO:0005634|nucleus	.
	f4p60_1183_28033	-1.93486	3.58806e-06	down	yes	-0.713738	0.0304607	down	no	-1.78697	2.1056e-07	down	yes	-1.37119	1.43984e-05	down	yes	-0.930151	0.00253821	down	no	gi|566167310|ref|XM_002305511.2|	2052	E:0	Populus trichocarpa no apical meristem family protein (POPTR_0004s18860g) mRNA, complete cds	gi|224078478|ref|XP_002305547.1|	564	E:0	no apical meristem family protein [Populus trichocarpa]	NAC35_ARATH	192	E:9e-55	RecName: Full=NAC domain-containing protein 35 {ECO:0000303|PubMed:15029955};^Eukaryota; Viridiplantae; Streptophyta; Embryophyta; Tracheophyta; Spermatophyta; Magnoliophyta; eudicotyledons; Gunneridae; Pentapetalae; rosids; malvids; Brassicales; Brassicaceae; Camelineae; Arabidopsis	NAC35_ARATH	192	E:3e-56	RecName: Full=NAC domain-containing protein 35 {ECO:0000303|PubMed:15029955};^Eukaryota; Viridiplantae; Streptophyta; Embryophyta; Tracheophyta; Spermatophyta; Magnoliophyta; eudicotyledons; Gunneridae; Pentapetalae; rosids; malvids; Brassicales; Brassicaceae; Camelineae; Arabidopsis	PF02365.14	NAM	No apical meristem (NAM) protein	ENOG410YIMX	nac domain	GO:0009908|flower development;GO:0006351|transcription, DNA-templatedGO:0006355|regulation of transcription, DNA-templated	GO:0003677|DNA binding;GO:0003700|transcription factor activity, sequence-specific DNA bindingGO:0003677|DNA binding	GO:0005634|nucleus	.
	f2p60_1234_9281	1.43262	3.23948e-33	up	yes	0.714128	1.93174e-08	up	no	0.234572	0.104957	up	no	0.715656	0.00568749	up	no	-0.262977	0.194209	down	no	gi|743824933|ref|XM_011024078.1|	2109	E:0	PREDICTED: Populus euphratica transcription factor JUNGBRUNNEN 1-like (LOC105124178), mRNA	gi|743824934|ref|XP_011022380.1|	587	E:0	PREDICTED: transcription factor JUNGBRUNNEN 1-like [Populus euphratica]	NAC42_ARATH	244	E:3e-76	RecName: Full=Transcription factor JUNGBRUNNEN 1;^Eukaryota; Viridiplantae; Streptophyta; Embryophyta; Tracheophyta; Spermatophyta; Magnoliophyta; eudicotyledons; Gunneridae; Pentapetalae; rosids; malvids; Brassicales; Brassicaceae; Camelineae; Arabidopsis	NAC42_ARATH	250	E:4e-80	RecName: Full=Transcription factor JUNGBRUNNEN 1;^Eukaryota; Viridiplantae; Streptophyta; Embryophyta; Tracheophyta; Spermatophyta; Magnoliophyta; eudicotyledons; Gunneridae; Pentapetalae; rosids; malvids; Brassicales; Brassicaceae; Camelineae; Arabidopsis	PF02365.14	NAM	No apical meristem (NAM) protein	ENOG410YFHY	(NAC) domain-containing protein	GO:0009718|anthocyanin-containing compound biosynthetic process;GO:0010120|camalexin biosynthetic process;GO:0042538|hyperosmotic salinity response;GO:0010150|leaf senescence;GO:1900056|negative regulation of leaf senescence;GO:0006561|proline biosynthetic process;GO:0006351|transcription, DNA-templated;GO:0005992|trehalose biosynthetic processGO:0006355|regulation of transcription, DNA-templated	GO:0003677|DNA binding;GO:0003700|transcription factor activity, sequence-specific DNA bindingGO:0003677|DNA binding	GO:0005634|nucleus	.
	f2p60_1192_9367	1.67365	3.78026e-10	up	yes	3.46092	6.26311e-75	up	yes	1.10191	1.97422e-05	up	yes	1.03474	0.000965634	up	yes	1.22176	5.53683e-07	up	yes	gi|566154097|ref|XM_006370242.1|	2115	E:0	Populus trichocarpa no apical meristem family protein (POPTR_0001s41460g) mRNA, complete cds	gi|566154098|ref|XP_006370304.1|	577	E:0	no apical meristem family protein [Populus trichocarpa]	NAC72_ARATH	280	E:8e-90	RecName: Full=NAC domain-containing protein 72;^Eukaryota; Viridiplantae; Streptophyta; Embryophyta; Tracheophyta; Spermatophyta; Magnoliophyta; eudicotyledons; Gunneridae; Pentapetalae; rosids; malvids; Brassicales; Brassicaceae; Camelineae; Arabidopsis	NAC72_ARATH	287	E:3e-94	RecName: Full=NAC domain-containing protein 72;^Eukaryota; Viridiplantae; Streptophyta; Embryophyta; Tracheophyta; Spermatophyta; Magnoliophyta; eudicotyledons; Gunneridae; Pentapetalae; rosids; malvids; Brassicales; Brassicaceae; Camelineae; Arabidopsis	PF02365.14	NAM	No apical meristem (NAM) protein	.	.	GO:0006355|regulation of transcription, DNA-templated;GO:0006351|transcription, DNA-templatedGO:0006355|regulation of transcription, DNA-templated	GO:0003677|DNA bindingGO:0003677|DNA binding	GO:0005634|nucleus	.
	f2p60_1426_25757	0.90754	3.01248e-16	up	no	1.63455	9.11043e-59	up	yes	0.977632	8.92417e-20	up	no	1.09915	2.24494e-10	up	yes	1.13309	7.50032e-26	up	yes	gi|118486671|gb|EF147142.1|	2481	E:0	Populus trichocarpa clone WS01228_D08 unknown mRNA	gi|224115014|ref|XP_002316917.1|	648	E:0	no apical meristem family protein [Populus trichocarpa]	NAC72_ARATH	351	E:1e-116	RecName: Full=NAC domain-containing protein 72;^Eukaryota; Viridiplantae; Streptophyta; Embryophyta; Tracheophyta; Spermatophyta; Magnoliophyta; eudicotyledons; Gunneridae; Pentapetalae; rosids; malvids; Brassicales; Brassicaceae; Camelineae; Arabidopsis	NAC72_ARATH	374	E:2e-127	RecName: Full=NAC domain-containing protein 72;^Eukaryota; Viridiplantae; Streptophyta; Embryophyta; Tracheophyta; Spermatophyta; Magnoliophyta; eudicotyledons; Gunneridae; Pentapetalae; rosids; malvids; Brassicales; Brassicaceae; Camelineae; Arabidopsis	PF02365.14	NAM	No apical meristem (NAM) protein	.	.	GO:0006355|regulation of transcription, DNA-templated;GO:0006351|transcription, DNA-templatedGO:0006355|regulation of transcription, DNA-templated	GO:0003677|DNA bindingGO:0003677|DNA binding	GO:0005634|nucleus	.
	f2p60_1123_9939	1.00059	2.44776e-08	up	yes	0.983843	4.72047e-09	up	no	1.20554	2.98888e-12	up	yes	0.813178	0.000265292	up	no	0.495857	0.00906581	up	no	gi|743935566|ref|XM_011013852.1|	1650	E:0	PREDICTED: Populus euphratica NAC domain-containing protein 68-like (LOC105116469), mRNA	gi|566212303|ref|XP_006373134.1|	481	E:2e-168	hypothetical protein POPTR_0017s09030g [Populus trichocarpa]	NAC83_ARATH	149	E:1e-40	RecName: Full=NAC domain-containing protein 83 {ECO:0000303|PubMed:15029955};^Eukaryota; Viridiplantae; Streptophyta; Embryophyta; Tracheophyta; Spermatophyta; Magnoliophyta; eudicotyledons; Gunneridae; Pentapetalae; rosids; malvids; Brassicales; Brassicaceae; Camelineae; Arabidopsis	NAC83_ARATH	149	E:4e-42	RecName: Full=NAC domain-containing protein 83 {ECO:0000303|PubMed:15029955};^Eukaryota; Viridiplantae; Streptophyta; Embryophyta; Tracheophyta; Spermatophyta; Magnoliophyta; eudicotyledons; Gunneridae; Pentapetalae; rosids; malvids; Brassicales; Brassicaceae; Camelineae; Arabidopsis	PF02365.14	NAM	No apical meristem (NAM) protein	ENOG410YED8	nac domain	GO:0010150|leaf senescence;GO:0045892|negative regulation of transcription, DNA-templated;GO:0009737|response to abscisic acid;GO:0009651|response to salt stress;GO:0006351|transcription, DNA-templated;GO:0016032|viral process;GO:0010089|xylem developmentGO:0006355|regulation of transcription, DNA-templated	GO:0003677|DNA binding;GO:0003700|transcription factor activity, sequence-specific DNA bindingGO:0003677|DNA binding	GO:0005634|nucleus	.
	f6p60_949_11466	-2.12347	1.9904e-08	down	yes	-1.43995	1.69079e-05	down	yes	-0.701232	0.0339623	down	no	-1.06777	0.000160037	down	yes	-0.413607	0.111097	down	no	gi|743919665|ref|XM_011005558.1|	1563	E:0	PREDICTED: Populus euphratica NAC domain-containing protein 90-like (LOC105110489), mRNA	gi|743919666|ref|XP_011003860.1|	507	E:1e-178	PREDICTED: NAC domain-containing protein 90-like [Populus euphratica]	NAC90_ARATH	255	E:3e-82	RecName: Full=NAC domain-containing protein 90;^Eukaryota; Viridiplantae; Streptophyta; Embryophyta; Tracheophyta; Spermatophyta; Magnoliophyta; eudicotyledons; Gunneridae; Pentapetalae; rosids; malvids; Brassicales; Brassicaceae; Camelineae; Arabidopsis	NAC90_ARATH	258	E:5e-84	RecName: Full=NAC domain-containing protein 90;^Eukaryota; Viridiplantae; Streptophyta; Embryophyta; Tracheophyta; Spermatophyta; Magnoliophyta; eudicotyledons; Gunneridae; Pentapetalae; rosids; malvids; Brassicales; Brassicaceae; Camelineae; Arabidopsis	PF02365.14	NAM	No apical meristem (NAM) protein	ENOG410YGJ5	NAC domain-containing protein	GO:0006351|transcription, DNA-templatedGO:0006355|regulation of transcription, DNA-templated	GO:0003677|DNA binding;GO:0003700|transcription factor activity, sequence-specific DNA bindingGO:0003677|DNA binding	GO:0005634|nucleus	.
NF-Y	f2p28_510_36372	-0.50631	0.320813	down	no	0.426845	0.321478	up	no	1.09894	0.00138814	up	yes	0.480362	0.142027	up	no	0.317489	0.32788	up	no	gi|157265589|gb|AC210129.1|	869	E:0	Populus trichocarpa clone POP009-F11, complete sequence	gi|743893813|ref|XP_011040148.1|	75.5	E:6e-15	PREDICTED: glycine-rich cell wall structural protein-like [Populus euphratica]	.	.	.	.	.	.	.	.	.	.	.	.	.	.	.	.	.
	f2p60_587_35404	-0.639134	0.257594	down	no	0.0108013	0.983624	up	no	1.22539	0.00130175	up	yes	0.361226	0.25582	up	no	-0.292172	0.336726	down	no	gi|157265589|gb|AC210129.1|	992	E:0	Populus trichocarpa clone POP009-F11, complete sequence	gi|566207945|ref|XP_006373583.1|	77.8	E:1e-15	hypothetical protein POPTR_0016s00610g [Populus trichocarpa]	.	.	.	.	.	.	.	.	.	.	.	.	.	.	.	.	.
NIN	f2p41_1986_22115	0.00776518	0.901248	up	no	-1.36306	1.36939e-63	down	yes	-1.29353	4.98843e-66	down	yes	-0.746982	NA	down	no	-0.457075	0.00447111	down	no	gi|743795218|ref|XM_011003759.1|	3356	E:0	PREDICTED: Populus euphratica protein NLP2-like (LOC105109144), transcript variant X2, mRNA	gi|566187092|ref|XP_002313184.2|	1006	E:0	RWP-RK domain-containing family protein [Populus trichocarpa]	NLP2_ARATH	300	E:1e-87	RecName: Full=Protein NLP2;^Eukaryota; Viridiplantae; Streptophyta; Embryophyta; Tracheophyta; Spermatophyta; Magnoliophyta; eudicotyledons; Gunneridae; Pentapetalae; rosids; malvids; Brassicales; Brassicaceae; Camelineae; Arabidopsis	NLP2_ARATH	313	E:4e-94	RecName: Full=Protein NLP2;^Eukaryota; Viridiplantae; Streptophyta; Embryophyta; Tracheophyta; Spermatophyta; Magnoliophyta; eudicotyledons; Gunneridae; Pentapetalae; rosids; malvids; Brassicales; Brassicaceae; Camelineae; Arabidopsis	PF02042.14	RWP-RK	RWP-RK domain	ENOG41129QX	RWP-RK domain-containing protein	GO:0006355|regulation of transcription, DNA-templated;GO:0006351|transcription, DNA-templated	GO:0003677|DNA binding;GO:0003700|transcription factor activity, sequence-specific DNA bindingGO:0005515|protein binding	GO:0005634|nucleus	.
	f2p60_2341_20816	-0.678946	2.04091e-34	down	no	-1.22081	8.17938e-74	down	yes	-0.837374	1.89387e-34	down	no	-0.720693	9.05172e-11	down	no	-0.374844	0.0025842	down	no	gi|566151784|ref|XM_002298741.2|	3480	E:0	Populus trichocarpa hypothetical protein (POPTR_0001s30040g) mRNA, complete cds	gi|566151785|ref|XP_002298777.2|	950	E:0	hypothetical protein POPTR_0001s30040g [Populus trichocarpa]	NLP2_ARATH	298	E:1e-85	RecName: Full=Protein NLP2;^Eukaryota; Viridiplantae; Streptophyta; Embryophyta; Tracheophyta; Spermatophyta; Magnoliophyta; eudicotyledons; Gunneridae; Pentapetalae; rosids; malvids; Brassicales; Brassicaceae; Camelineae; Arabidopsis	NLP2_ARATH	304	E:9e-91	RecName: Full=Protein NLP2;^Eukaryota; Viridiplantae; Streptophyta; Embryophyta; Tracheophyta; Spermatophyta; Magnoliophyta; eudicotyledons; Gunneridae; Pentapetalae; rosids; malvids; Brassicales; Brassicaceae; Camelineae; Arabidopsis	PF02042.14	RWP-RK	RWP-RK domain	ENOG41129QX	RWP-RK domain-containing protein	GO:0006355|regulation of transcription, DNA-templated;GO:0006351|transcription, DNA-templated	GO:0003677|DNA binding;GO:0003700|transcription factor activity, sequence-specific DNA bindingGO:0005515|protein binding	GO:0005634|nucleus	.
TCP	f2p21_2379_20693	-1.65403	1.22744e-19	down	yes	-0.722647	1.76212e-06	down	no	-0.230996	0.103853	down	no	-0.490168	0.000581744	down	no	0.192803	0.17668	up	no	gi|566241783|ref|XM_002325547.2|	4229	E:0	Populus trichocarpa hypothetical protein (POPTR_0019s12110g) mRNA, complete cds	gi|224145265|ref|XP_002325583.1|	645	E:0	hypothetical protein POPTR_0019s12110g [Populus trichocarpa]	TCP4_ARATH	226	E:2e-64	RecName: Full=Transcription factor TCP4;^Eukaryota; Viridiplantae; Streptophyta; Embryophyta; Tracheophyta; Spermatophyta; Magnoliophyta; eudicotyledons; Gunneridae; Pentapetalae; rosids; malvids; Brassicales; Brassicaceae; Camelineae; Arabidopsis	TCP4_ARATH	233	E:9e-71	RecName: Full=Transcription factor TCP4;^Eukaryota; Viridiplantae; Streptophyta; Embryophyta; Tracheophyta; Spermatophyta; Magnoliophyta; eudicotyledons; Gunneridae; Pentapetalae; rosids; malvids; Brassicales; Brassicaceae; Camelineae; Arabidopsis	PF03634.12	TCP	TCP family transcription factor	ENOG410YG88	Transcription factor	GO:0030154|cell differentiation;GO:0009793|embryo development ending in seed dormancy;GO:0048366|leaf development;GO:0009965|leaf morphogenesis;GO:0045962|positive regulation of development, heterochronic;GO:0006355|regulation of transcription, DNA-templated;GO:0006351|transcription, DNA-templated	GO:0003677|DNA binding;GO:0003700|transcription factor activity, sequence-specific DNA binding	GO:0005634|nucleus	.
WRKY	f2p53_770_33148	-0.719952	0.086376	down	no	-1.04092	0.0117249	down	yes	-0.979832	0.00763976	down	no	-0.743109	0.0269676	down	no	-0.267937	0.420665	down	no	gi|224089359|ref|XM_002308668.1|	1166	E:0	Populus trichocarpa putative WRKY transcription factor family protein (POPTR_0006s27950g) mRNA, complete cds	gi|224089360|ref|XP_002308704.1|	317	E:8e-105	putative WRKY transcription factor family protein [Populus trichocarpa]	WRK18_ARATH	187	E:2e-55	RecName: Full=WRKY transcription factor 18;^Eukaryota; Viridiplantae; Streptophyta; Embryophyta; Tracheophyta; Spermatophyta; Magnoliophyta; eudicotyledons; Gunneridae; Pentapetalae; rosids; malvids; Brassicales; Brassicaceae; Camelineae; Arabidopsis	WRK40_ARATH	201	E:2e-62	RecName: Full=Probable WRKY transcription factor 40;^Eukaryota; Viridiplantae; Streptophyta; Embryophyta; Tracheophyta; Spermatophyta; Magnoliophyta; eudicotyledons; Gunneridae; Pentapetalae; rosids; malvids; Brassicales; Brassicaceae; Camelineae; Arabidopsis	PF03106.14	WRKY	WRKY DNA -binding domain	ENOG410YHES	WRKY transcription factor	GO:0042742|defense response to bacterium;GO:0050832|defense response to fungus;GO:0045892|negative regulation of transcription, DNA-templated;GO:0031347|regulation of defense response;GO:0010200|response to chitin;GO:0002237|response to molecule of bacterial origin;GO:0009751|response to salicylic acid;GO:0009611|response to wounding;GO:0006351|transcription, DNA-templatedGO:0006355|regulation of…	GO:0043565|sequence-specific DNA binding;GO:0003700|transcription factor activity, sequence-specific DNA binding;GO:0044212|transcription regulatory region DNA bindingGO:0003700|transcription factor activity, sequence-specific DNA binding;GO:0043565|sequence-specific DNA binding	GO:0005634|nucleus	.
	f4p60_1249_9006	-0.820681	0.00020935	down	no	-0.802061	0.000172167	down	no	-0.644345	0.0043021	down	no	-1.02187	3.19038e-06	down	yes	-0.324178	NA	down	no	gi|224089359|ref|XM_002308668.1|	2154	E:0	Populus trichocarpa putative WRKY transcription factor family protein (POPTR_0006s27950g) mRNA, complete cds	gi|224089360|ref|XP_002308704.1|	573	E:0	putative WRKY transcription factor family protein [Populus trichocarpa]	WRK18_ARATH	238	E:2e-73	RecName: Full=WRKY transcription factor 18;^Eukaryota; Viridiplantae; Streptophyta; Embryophyta; Tracheophyta; Spermatophyta; Magnoliophyta; eudicotyledons; Gunneridae; Pentapetalae; rosids; malvids; Brassicales; Brassicaceae; Camelineae; Arabidopsis	WRK18_ARATH	259	E:1e-82	RecName: Full=WRKY transcription factor 18;^Eukaryota; Viridiplantae; Streptophyta; Embryophyta; Tracheophyta; Spermatophyta; Magnoliophyta; eudicotyledons; Gunneridae; Pentapetalae; rosids; malvids; Brassicales; Brassicaceae; Camelineae; Arabidopsis	PF03106.14	WRKY	WRKY DNA -binding domain	ENOG410YHES	WRKY transcription factor	GO:0042742|defense response to bacterium;GO:0050832|defense response to fungus;GO:0031347|regulation of defense response;GO:0010200|response to chitin;GO:0002237|response to molecule of bacterial origin;GO:0009751|response to salicylic acid;GO:0006351|transcription, DNA-templatedGO:0006355|regulation of transcription, DNA-templated	GO:0042802|identical protein binding;GO:0043565|sequence-specific DNA binding;GO:0003700|transcription factor activity, sequence-specific DNA bindingGO:0003700|transcription factor activity, sequence-specific DNA binding;GO:0043565|sequence-specific DNA binding	GO:0005634|nucleus	.
	f2p35_1482_25329	2.28857	1.24572e-52	up	yes	0.983155	5.86569e-08	up	no	0.417791	0.0335265	up	no	-0.178905	0.382808	down	no	-0.621644	0.00489576	down	no	gi|118487934|gb|EF147787.1|	2549	E:0	Populus trichocarpa clone WS0125_A17 unknown mRNA	gi|118487935|gb|ABK95789.1|	572	E:0	unknown [Populus trichocarpa]	WRK40_ARATH	292	E:3e-93	RecName: Full=Probable WRKY transcription factor 40;^Eukaryota; Viridiplantae; Streptophyta; Embryophyta; Tracheophyta; Spermatophyta; Magnoliophyta; eudicotyledons; Gunneridae; Pentapetalae; rosids; malvids; Brassicales; Brassicaceae; Camelineae; Arabidopsis	WRK40_ARATH	321	E:6e-107	RecName: Full=Probable WRKY transcription factor 40;^Eukaryota; Viridiplantae; Streptophyta; Embryophyta; Tracheophyta; Spermatophyta; Magnoliophyta; eudicotyledons; Gunneridae; Pentapetalae; rosids; malvids; Brassicales; Brassicaceae; Camelineae; Arabidopsis	PF03106.14	WRKY	WRKY DNA -binding domain	ENOG410YHES	WRKY transcription factor	GO:0042742|defense response to bacterium;GO:0050832|defense response to fungus;GO:0045892|negative regulation of transcription, DNA-templated;GO:0031347|regulation of defense response;GO:0010200|response to chitin;GO:0002237|response to molecule of bacterial origin;GO:0009751|response to salicylic acid;GO:0009611|response to wounding;GO:0006351|transcription, DNA-templatedGO:0006355|regulation of…	GO:0043565|sequence-specific DNA binding;GO:0003700|transcription factor activity, sequence-specific DNA binding;GO:0044212|transcription regulatory region DNA bindingGO:0003700|transcription factor activity, sequence-specific DNA binding;GO:0043565|sequence-specific DNA binding	GO:0005634|nucleus	.
	f4p60_2032_21887	1.10195	6.685e-09	up	yes	0.999232	2.72432e-08	up	no	0.387596	0.0509957	up	no	0.165759	0.42142	up	no	0.271228	NA	up	no	gi|566210132|ref|XM_002323601.2|	3214	E:0	Populus trichocarpa WRKY family transcription factor family protein (POPTR_0016s13600g) mRNA, complete cds	gi|566210133|ref|XP_002323637.2|	799	E:0	WRKY family transcription factor family protein [Populus trichocarpa]	WRK33_ARATH	378	E:3e-121	RecName: Full=Probable WRKY transcription factor 33;^Eukaryota; Viridiplantae; Streptophyta; Embryophyta; Tracheophyta; Spermatophyta; Magnoliophyta; eudicotyledons; Gunneridae; Pentapetalae; rosids; malvids; Brassicales; Brassicaceae; Camelineae; Arabidopsis	WRK26_ARATH	57	E:9e-09	RecName: Full=Probable WRKY transcription factor 26;^Eukaryota; Viridiplantae; Streptophyta; Embryophyta; Tracheophyta; Spermatophyta; Magnoliophyta; eudicotyledons; Gunneridae; Pentapetalae; rosids; malvids; Brassicales; Brassicaceae; Camelineae; Arabidopsis	.	.	.	ENOG4112BTF	WRKY transcription factor	GO:0070370|cellular heat acclimation;GO:0034605|cellular response to heat;GO:0006351|transcription, DNA-templated	GO:0043565|sequence-specific DNA binding;GO:0003700|transcription factor activity, sequence-specific DNA binding	GO:0005634|nucleus	K13424|WRKY33; WRKY transcription factor 33
	f2p60_1831_5110	1.96255	3.74449e-65	up	yes	-0.128241	0.408608	down	no	-0.639868	0.000145224	down	no	-0.720848	0.000409847	down	no	-0.946586	1.90875e-07	down	no	gi|566147037|ref|XM_006368449.1|	1777	E:0	Populus trichocarpa WRKY transcription factor 40 family protein (POPTR_0001s03620g) mRNA, complete cds	gi|566147038|ref|XP_006368511.1|	456	E:4e-154	WRKY transcription factor 40 family protein [Populus trichocarpa]	WRK40_ARATH	281	E:1e-87	RecName: Full=Probable WRKY transcription factor 40;^Eukaryota; Viridiplantae; Streptophyta; Embryophyta; Tracheophyta; Spermatophyta; Magnoliophyta; eudicotyledons; Gunneridae; Pentapetalae; rosids; malvids; Brassicales; Brassicaceae; Camelineae; Arabidopsis	WRK40_ARATH	273	E:1e-89	RecName: Full=Probable WRKY transcription factor 40;^Eukaryota; Viridiplantae; Streptophyta; Embryophyta; Tracheophyta; Spermatophyta; Magnoliophyta; eudicotyledons; Gunneridae; Pentapetalae; rosids; malvids; Brassicales; Brassicaceae; Camelineae; Arabidopsis	PF03106.14	WRKY	WRKY DNA -binding domain	ENOG410YHES	WRKY transcription factor	GO:0042742|defense response to bacterium;GO:0050832|defense response to fungus;GO:0045892|negative regulation of transcription, DNA-templated;GO:0031347|regulation of defense response;GO:0010200|response to chitin;GO:0002237|response to molecule of bacterial origin;GO:0009751|response to salicylic acid;GO:0009611|response to wounding;GO:0006351|transcription, DNA-templatedGO:0006355|regulation of…	GO:0043565|sequence-specific DNA binding;GO:0003700|transcription factor activity, sequence-specific DNA binding;GO:0044212|transcription regulatory region DNA bindingGO:0003700|transcription factor activity, sequence-specific DNA binding;GO:0043565|sequence-specific DNA binding	GO:0005634|nucleus	.
	f3p60_1311_8503	1.85038	3.2269e-94	up	yes	2.00238	3.26463e-121	up	yes	1.8012	1.47583e-81	up	yes	0.549111	5.60358e-06	up	no	0.107373	0.413779	up	no	gi|566213852|ref|XM_006371700.1|	2215	E:0	Populus trichocarpa hypothetical protein (POPTR_0018s02470g) mRNA, complete cds	gi|566213853|ref|XP_006371762.1|	657	E:0	hypothetical protein POPTR_0018s02470g [Populus trichocarpa]	WRK40_ARATH	265	E:2e-83	RecName: Full=Probable WRKY transcription factor 40;^Eukaryota; Viridiplantae; Streptophyta; Embryophyta; Tracheophyta; Spermatophyta; Magnoliophyta; eudicotyledons; Gunneridae; Pentapetalae; rosids; malvids; Brassicales; Brassicaceae; Camelineae; Arabidopsis	WRK40_ARATH	265	E:4e-85	RecName: Full=Probable WRKY transcription factor 40;^Eukaryota; Viridiplantae; Streptophyta; Embryophyta; Tracheophyta; Spermatophyta; Magnoliophyta; eudicotyledons; Gunneridae; Pentapetalae; rosids; malvids; Brassicales; Brassicaceae; Camelineae; Arabidopsis	PF03106.14	WRKY	WRKY DNA -binding domain	ENOG410YHES	WRKY transcription factor	GO:0042742|defense response to bacterium;GO:0050832|defense response to fungus;GO:0045892|negative regulation of transcription, DNA-templated;GO:0031347|regulation of defense response;GO:0010200|response to chitin;GO:0002237|response to molecule of bacterial origin;GO:0009751|response to salicylic acid;GO:0009611|response to wounding;GO:0006351|transcription, DNA-templatedGO:0006355|regulation of…	GO:0043565|sequence-specific DNA binding;GO:0003700|transcription factor activity, sequence-specific DNA binding;GO:0044212|transcription regulatory region DNA bindingGO:0003700|transcription factor activity, sequence-specific DNA binding;GO:0043565|sequence-specific DNA binding	GO:0005634|nucleus	.
	f2p60_1004_30166	1.41713	0.00689504	up	yes	0.751833	0.153635	up	no	0.306785	0.422952	up	no	-0.0306029	0.916508	down	no	-0.102142	0.702552	down	no	gi|566162537|ref|XM_002304513.2|	1522	E:0	Populus trichocarpa WRKY transcription factor 53 family protein (POPTR_0003s13840g) mRNA, complete cds	gi|224075078|ref|XP_002304549.1|	251	E:2e-106	WRKY transcription factor 53 family protein [Populus trichocarpa]	WRK41_ARATH	171	E:9e-49	RecName: Full=Probable WRKY transcription factor 41;^Eukaryota; Viridiplantae; Streptophyta; Embryophyta; Tracheophyta; Spermatophyta; Magnoliophyta; eudicotyledons; Gunneridae; Pentapetalae; rosids; malvids; Brassicales; Brassicaceae; Camelineae; Arabidopsis	WRK41_ARATH	174	E:1e-52	RecName: Full=Probable WRKY transcription factor 41;^Eukaryota; Viridiplantae; Streptophyta; Embryophyta; Tracheophyta; Spermatophyta; Magnoliophyta; eudicotyledons; Gunneridae; Pentapetalae; rosids; malvids; Brassicales; Brassicaceae; Camelineae; Arabidopsis	PF03106.14	WRKY	WRKY DNA -binding domain	ENOG410YZU1	Transcription factor	GO:0006351|transcription, DNA-templatedGO:0006355|regulation of transcription, DNA-templated	GO:0043565|sequence-specific DNA binding;GO:0003700|transcription factor activity, sequence-specific DNA bindingGO:0003700|transcription factor activity, sequence-specific DNA binding;GO:0043565|sequence-specific DNA binding	GO:0005634|nucleus	.
	f2p50_1323_8348	-3.95819	3.17313e-37	down	yes	-2.59739	5.25112e-28	down	yes	-3.77636	7.0746e-40	down	yes	-2.30639	8.55191e-20	down	yes	-2.06442	1.69923e-15	down	yes	gi|566175618|ref|XM_002309150.2|	2052	E:0	Populus trichocarpa hypothetical protein (POPTR_0006s10950g) mRNA, complete cds	gi|566175619|ref|XP_002309186.2|	623	E:0	hypothetical protein POPTR_0006s10950g [Populus trichocarpa]	WRK70_ARATH	130	E:7e-33	RecName: Full=Probable WRKY transcription factor 70;^Eukaryota; Viridiplantae; Streptophyta; Embryophyta; Tracheophyta; Spermatophyta; Magnoliophyta; eudicotyledons; Gunneridae; Pentapetalae; rosids; malvids; Brassicales; Brassicaceae; Camelineae; Arabidopsis	WRK70_ARATH	144	E:1e-38	RecName: Full=Probable WRKY transcription factor 70;^Eukaryota; Viridiplantae; Streptophyta; Embryophyta; Tracheophyta; Spermatophyta; Magnoliophyta; eudicotyledons; Gunneridae; Pentapetalae; rosids; malvids; Brassicales; Brassicaceae; Camelineae; Arabidopsis	PF03106.14	WRKY	WRKY DNA -binding domain	ENOG410YZZY	Transcription factor	GO:0042742|defense response to bacterium;GO:0050832|defense response to fungus;GO:0009864|induced systemic resistance, jasmonic acid mediated signaling pathway;GO:1900056|negative regulation of leaf senescence;GO:0045892|negative regulation of transcription, DNA-templated;GO:0031347|regulation of defense response;GO:0010200|response to chitin;GO:0009753|response to jasmonic acid;GO:0009751|respon…	GO:0043565|sequence-specific DNA binding;GO:0003700|transcription factor activity, sequence-specific DNA bindingGO:0003700|transcription factor activity, sequence-specific DNA binding;GO:0043565|sequence-specific DNA binding	GO:0005634|nucleus	.
	f2p60_1345_26474	-1.63756	9.75054e-07	down	yes	-1.42035	7.08426e-06	down	yes	-2.45546	3.19081e-14	down	yes	-1.11312	0.000916649	down	yes	-2.17849	1.77997e-12	down	yes	gi|566210277|ref|XM_002323639.2|	2314	E:0	Populus trichocarpa hypothetical protein (POPTR_0016s14490g) mRNA, complete cds	gi|224140611|ref|XP_002323675.1|	537	E:0	hypothetical protein POPTR_0016s14490g [Populus trichocarpa]	WRK70_ARATH	125	E:6e-31	RecName: Full=Probable WRKY transcription factor 70;^Eukaryota; Viridiplantae; Streptophyta; Embryophyta; Tracheophyta; Spermatophyta; Magnoliophyta; eudicotyledons; Gunneridae; Pentapetalae; rosids; malvids; Brassicales; Brassicaceae; Camelineae; Arabidopsis	WRK70_ARATH	140	E:2e-37	RecName: Full=Probable WRKY transcription factor 70;^Eukaryota; Viridiplantae; Streptophyta; Embryophyta; Tracheophyta; Spermatophyta; Magnoliophyta; eudicotyledons; Gunneridae; Pentapetalae; rosids; malvids; Brassicales; Brassicaceae; Camelineae; Arabidopsis	PF03106.14	WRKY	WRKY DNA -binding domain	ENOG410YZZY	Transcription factor	GO:0042742|defense response to bacterium;GO:0050832|defense response to fungus;GO:0009864|induced systemic resistance, jasmonic acid mediated signaling pathway;GO:1900056|negative regulation of leaf senescence;GO:0045892|negative regulation of transcription, DNA-templated;GO:0031347|regulation of defense response;GO:0010200|response to chitin;GO:0009753|response to jasmonic acid;GO:0009751|respon…	GO:0043565|sequence-specific DNA binding;GO:0003700|transcription factor activity, sequence-specific DNA bindingGO:0003700|transcription factor activity, sequence-specific DNA binding;GO:0043565|sequence-specific DNA binding	GO:0005634|nucleus	.
	f2p37_1325_26690	3.04794	4.59392e-38	up	yes	2.30657	1.42936e-19	up	yes	1.55146	1.06208e-08	up	yes	1.37668	3.75466e-05	up	yes	1.35714	4.6576e-07	up	yes	gi|566207011|ref|XM_002322238.2|	2183	E:0	Populus trichocarpa hypothetical protein (POPTR_0015s11130g) mRNA, complete cds	gi|224136217|ref|XP_002322274.1|	340	E:2e-113	hypothetical protein POPTR_0015s11130g [Populus trichocarpa]	WRK75_ARATH	154	E:4e-43	RecName: Full=Probable WRKY transcription factor 75;^Eukaryota; Viridiplantae; Streptophyta; Embryophyta; Tracheophyta; Spermatophyta; Magnoliophyta; eudicotyledons; Gunneridae; Pentapetalae; rosids; malvids; Brassicales; Brassicaceae; Camelineae; Arabidopsis	WRK75_ARATH	155	E:2e-46	RecName: Full=Probable WRKY transcription factor 75;^Eukaryota; Viridiplantae; Streptophyta; Embryophyta; Tracheophyta; Spermatophyta; Magnoliophyta; eudicotyledons; Gunneridae; Pentapetalae; rosids; malvids; Brassicales; Brassicaceae; Camelineae; Arabidopsis	PF03106.14	WRKY	WRKY DNA -binding domain	ENOG410YM5M	WRKY	GO:0010055|atrichoblast differentiation;GO:0048527|lateral root development;GO:0000122|negative regulation of transcription from RNA polymerase II promoter;GO:0043620|regulation of DNA-templated transcription in response to stress;GO:0032107|regulation of response to nutrient levels;GO:0006351|transcription, DNA-templatedGO:0006355|regulation of transcription, DNA-templated	GO:0001046|core promoter sequence-specific DNA binding;GO:0003700|transcription factor activity, sequence-specific DNA binding;GO:0044212|transcription regulatory region DNA bindingGO:0003700|transcription factor activity, sequence-specific DNA binding;GO:0043565|sequence-specific DNA binding	GO:0005634|nucleus	.
YABB	f3p60_1037_29655	1.60331	0.00457582	up	yes	2.43902	3.4653e-06	up	yes	1.1649	0.00228806	up	yes	0.722587	0.00912923	up	no	-0.0289453	0.833223	down	no	1698	gi|566215592|ref|XP_002324648.2|	393	E:3e-135	hypothetical protein POPTR_0018s12990g [Populus trichocarpa]	YAB5_ARATH	251	E:4e-81	RecName: Full=Axial regulator YABBY 5;^Eukaryota; Viridiplantae; Streptophyta; Embryophyta; Tracheophyta; Spermatophyta; Magnoliophyta; eudicotyledons; Gunneridae; Pentapetalae; rosids; malvids; Brassicales; Brassicaceae; Camelineae; Arabidopsis	YAB5_ARATH	251	E:7e-84	RecName: Full=Axial regulator YABBY 5;^Eukaryota; Viridiplantae; Streptophyta; Embryophyta; Tracheophyta; Spermatophyta; Magnoliophyta; eudicotyledons; Gunneridae; Pentapetalae; rosids; malvids; Brassicales; Brassicaceae; Camelineae; Arabidopsis	PF04690.12	YABBY	YABBY protein	ENOG41115SR	axial regulator YABBY	.	.	.	GO:0009944|polarity specification of adaxial/abaxial axis;GO:2000024|regulation of leaf development;GO:1902183|regulation of shoot apical meristem development;GO:0006355|regulation of transcription, DNA-templatedGO:0007275|multicellular organism development	GO:0003677|DNA binding;GO:0046872|metal ion binding;GO:0003700|transcription factor activity, sequence-specific DNA binding	GO:0005634|nucleus	.
	f3p60_734_33370	2.07482	3.01213e-16	up	yes	3.64147	1.02215e-80	up	yes	4.01688	3.79591e-99	up	yes	2.6906	7.69498e-36	up	yes	0.349926	0.226998	up	no	1103	gi|566150320|ref|XP_002299656.2|	334	E:9e-114	hypothetical protein POPTR_0001s22170g [Populus trichocarpa]	DIR23_ARATH	165	E:1e-48	RecName: Full=Dirigent protein 23;^Eukaryota; Viridiplantae; Streptophyta; Embryophyta; Tracheophyta; Spermatophyta; Magnoliophyta; eudicotyledons; Gunneridae; Pentapetalae; rosids; malvids; Brassicales; Brassicaceae; Camelineae; Arabidopsis	DIR23_ARATH	166	E:5e-50	RecName: Full=Dirigent protein 23;^Eukaryota; Viridiplantae; Streptophyta; Embryophyta; Tracheophyta; Spermatophyta; Magnoliophyta; eudicotyledons; Gunneridae; Pentapetalae; rosids; malvids; Brassicales; Brassicaceae; Camelineae; Arabidopsis	PF03018.13	Dirigent	Dirigent-like protein	ENOG410YZUA	Disease resistance response protein	.	ExpAA=40.48^PredHel=1^Topology=i7-29o	.	.	GO:0016853|isomerase activity	GO:0048046|apoplast	.
